# Supplementary material for: A seven-transmembrane methyltransferase catalysing N-terminal histidine methylation of lytic polysaccharide monooxygenases
Source: Research Square preprint supplement (doi:10.21203/rs.3.rs-2289157/v1), 2022-12-21
Supplement: Supplementary file 1 [file 03b174a8ccb82c6a6e5475e7.xlsx]

## Sheet: Info
Supplementary table 7
	This sheet contains MS1 precursor quantitation of the N-terminal peptide HGSVINPATR (charge state 2) of in-gel digested samples of the TfAA10A protein as displayed in Figure 6E.
	Quantitation was performed in Skyline and the identification was confirmed by data dependent acquisition analysis.

## Sheet: Sheet1
	TfLPMO		HGSVINPATR - 526.2858++
				precursor - 526.2858++	precursor [M+1] - 526.7872++	precursor [M+2] - 527.2884++
			Replicate	Peak Area	Peak Area	Peak Area		Sum
			TfAA10A	1112076800	635299904	245607312		1992984016
			TfAA10A + AN4663 Rep 1	831047168	417071296	168530896		1416649360
			TfAA10A + AN4663 Rep 2	699433344	416161760	159559264		1275154368
			TfAA10A + AN4663 Rep 3	1611970560	894410880	347388576		2853770016
			H(meth)GSVINPATR - 533.2936++
				precursor - 533.2936++	precursor [M+1] - 533.7950++	precursor [M+2] - 534.2963++
			Replicate	Peak Area	Peak Area	Peak Area		Sum					Stochiometry (%)
			TfAA10A	2.78378e+06	6.71561e+06	3.94705e+06		1.34464e+07				TfAA10A	0.670167
			TfAA10A + AN4663 Rep 1	181467328	103524272	31907852		316899452				TfAA10A + AN4663 Rep 1	18.2804
			TfAA10A + AN4663 Rep 2	138053008	76212632	20941646		235207286				TfAA10A + AN4663 Rep 2	15.5729
			TfAA10A + AN4663 Rep 3	255428832	149587168	45598516		450614516				TfAA10A + AN4663 Rep 3	13.6369
