# Supplementary material for: A seven-transmembrane methyltransferase catalysing N-terminal histidine methylation of lytic polysaccharide monooxygenases
Source: Research Square preprint supplement (doi:10.21203/rs.3.rs-2289157/v1), 2022-12-21
Supplement: Supplementary file 2 [file 382860b18fc760fd6f41cfb5.xlsx]

## Sheet: Info
This table contains methyltransferases candidates which were short listed based on differential abundance.
Candidates were selected based on those which displayed higher statistical protein abundance when Aspergillus nidulans cells were grown on cellulose (CE) vs when grown on glucose in minimal media (MM) or potato dextrose (PD).
Fold change difference in abundance is represented under fold change columns. Ie. Fold change of "2" means the particular methyltransferase was 2 times higher in abundance in cellulose (CE) grown cells.
Candidates were also selected if they were found to contain histidine methylation sites.

## Sheet: Candidate list
T: Protein.IDs	C: Gene names	LFQ	TMT	Site Regulation	Protein regulation	Regulated vs MM	Regulated vs PD	LFQ Fold CE vs MM	LFQ Fold CE vs PD	TMT Fold CE vs MM	TMT Fold CE vs PD	Mtase type	C: Protein names	C: Pfam	C: Interpro	C: Interpro name	C: Gene ontology (molecular function)	C: Cross-reference (PROSITE)	C: Cross-reference (Pfam)
Q5BFB9	ANIA_00761	x	x		x	x	x	6.4505	6.55765	5.46098	3.30106	O	Methyltransf_2 domain-containing protein	Methyltransf_2	IPR001077;IPR011991;IPR016461;IPR029063	O_MeTrfase_2;O-MeTrfase_COMT;SAM-dependent_MTases;WHTH_DNA-bd_dom	O-methyltransferase activity [GO:0008171];S-adenosylmethionine-dependent methyltransferase activity [GO:0008757]	PS51683	PF00891
Q5ARS5;Q5B768	ANIA_03612;ANIA_09005	x	x		x	x	x	5.45239	27.4613	2.44849	3.19929	N	Polyketide synthase, putative (JCVI)	Acyl_transf_1;ADH_zinc_N;ketoacyl-synt;Ketoacyl-synt_C;KR;Methyltransf_12;PP-binding;PS-DH	IPR001227;IPR006162;IPR009081;IPR011032;IPR013149;IPR013217;IPR013968;IPR014030;IPR014031;IPR014043;IPR016035;IPR016036;IPR016038;IPR016039;IPR016040;IPR018201;IPR020801;IPR020807;IPR020841;IPR020843;IPR029063	Ac_transferase_dom;Acyl_carrier_prot-like;Acyl_transferase;Acyl_Trfase/lysoPLipase;ADH_C;GroES-like;Ketoacyl_synth_AS;Ketoacyl_synth_C;Ketoacyl_synth_N;Malonyl_transacylase_ACP-bd;Methyltransf_12;NAD(P)-bd_dom;PKS_acyl_transferase;PKS_Beta-ketoAc_synthase_dom;PKS_dehydratase;PKS_ER;PKS_KR;Ppantetheine_attach_site;SAM-dependent_MTases;Thiolase-like;Thiolase-like_subgr	methyltransferase activity [GO:0008168];oxidoreductase activity [GO:0016491];phosphopantetheine binding [GO:0031177];transferase activity [GO:0016740]	PS00012;PS00606;PS50075	PF00109;PF00550;PF00698;PF02801;PF08242;PF08659;PF14765;PF16197
Q5B4A5	ANIA_04625		x		x	x	x			2.23738	2.13205		Arsenic methyltransferase Cyt19, putative (AFU_orthologue AFUA_5G15020)	Methyltransf_31	IPR025714;IPR026669;IPR029063	Arsenite_MeTrfase;Methyltranfer_dom;SAM-dependent_MTases	methyltransferase activity [GO:0008168]		PF13847
Q5B622	ANIA_04008	x	x		x	x	x	3.56371	2.94123	2.03041	2.0775	O	Hypothetical O-methyltransferase (Eurofung)	Methyltransf_2	IPR001077;IPR011991;IPR016461;IPR029063	O_MeTrfase_2;O-MeTrfase_COMT;SAM-dependent_MTases;WHTH_DNA-bd_dom	O-methyltransferase activity [GO:0008171]	PS51683	PF00891
C8VM99	ANIA_02165	x	x		x		x		6.14682	1.05904	2.0385		TAM domain methyltransferase, putative (AFU_orthologue AFUA_2G15860)		IPR029063	SAM-dependent_MTases
Q5AWR6	ANIA_07264	x	x		x	x	x	1.98434	3.4941	1.34905	1.92298		Methyltransf_25 domain-containing protein		IPR029063	SAM-dependent_MTases			PF13649
C8VQG9	laeA ANIA_00807	x	x		x	x	x		2.11753	1.30249	1.89792		Secondary metabolism regulator laeA (Methyltransferase laeA) (EC 2.1.1.-) (Velvet complex subunit laeA)		IPR029063	SAM-dependent_MTases
Q5B7L6	ANIA_03464		x		x	x	x			1.42199	1.82036	O	Protein-L-isoaspartate O-methyltransferase (EC 2.1.1.77)	PCMT	IPR000682;IPR029063	PCMT;SAM-dependent_MTases	protein-L-isoaspartate (D-aspartate) O-methyltransferase activity [GO:0004719]	PS01279
C8VB33	ANIA_10889		x		x	x	x			1.53695	1.65302	O	Methyltransf_2 domain-containing protein	Methyltransf_2	IPR001077;IPR011991;IPR016461;IPR029063	O_MeTrfase_2;O-MeTrfase_COMT;SAM-dependent_MTases;WHTH_DNA-bd_dom	O-methyltransferase activity [GO:0008171]	PS51683	PF00891
Q5AZ49	ANIA_06431		x		x	x	x			2.08829	1.53309	N	Polyketide synthase, putative (JCVI)	Acyl_transf_1;ADH_zinc_N;ketoacyl-synt;Ketoacyl-synt_C;KR;Methyltransf_12;PS-DH	IPR001227;IPR011032;IPR013149;IPR013217;IPR013968;IPR014030;IPR014031;IPR014043;IPR016035;IPR016036;IPR016038;IPR016039;IPR016040;IPR020801;IPR020807;IPR020843;IPR029063	Ac_transferase_dom;Acyl_transferase;Acyl_Trfase/lysoPLipase;ADH_C;GroES-like;Ketoacyl_synth_C;Ketoacyl_synth_N;Malonyl_transacylase_ACP-bd;Methyltransf_12;NAD(P)-bd_dom;PKS_acyl_transferase;PKS_dehydratase;PKS_ER;PKS_KR;SAM-dependent_MTases;Thiolase-like;Thiolase-like_subgr	oxidoreductase activity [GO:0016491];transferase activity [GO:0016740]		PF00107;PF00109;PF00698;PF02801;PF08242;PF08659;PF14765
C8UZY1	ANIA_05874		x		x	x	x			1.54856	1.50093		Uncharacterized protein		IPR029063	SAM-dependent_MTases	methyltransferase activity [GO:0008168]
Q5BH46	ANIA_00134	x	x		x	x	x	1.68873	1.79078	1.23854	1.4218	N	Protein arginine N-methyltransferase	PRMT5	IPR007857;IPR025799;IPR029063	Arg_MeTrfase;Arg_MeTrfase_PRMT5;SAM-dependent_MTases	histone-arginine N-methyltransferase activity [GO:0008469]	PS51678	PF05185;PF17285;PF17286
C8V246	ANIA_06162		x		x		x				1.35604	O	Protein-S-isoprenylcysteine O-methyltransferase	ICMT	IPR007269;IPR025770	ICMT_MeTrfase;PPMT_MeTrfase	carboxyl-O-methyltransferase activity;catalytic activity;methyltransferase activity;O-methyltransferase activity;protein carboxyl O-methyltransferase activity;protein C-terminal carboxyl O-methyltransferase activity;protein C-terminal S-isoprenylcysteine carboxyl O-methyltransferase activity;protein methyltransferase activity;S-adenosylmethionine-dependent methyltransferase activity;transferase a…	PS51564	PF04140
C8VLB4	ANIA_08945	x	x		x	x	x	1.28085	1.72412	1.12527	1.33663		Methyltransferase LaeA-like, putative (AFU_orthologue AFUA_8G01930)		IPR029063	SAM-dependent_MTases
C8VH48	ANIA_09098		x		x	x	x			1.29009	1.33055	N	Uncharacterized protein	Methyltransf_16	IPR019410;IPR029063	Nicotinamide_N-MeTfrase-like;SAM-dependent_MTases			PF10294
Q5B054	ANIA_06076		x		x		x				1.28235		SNF2 family helicase	SNF2_N	IPR000330;IPR014001;IPR027417;IPR029063	Helicase_ATP-bd;P-loop_NTPase;SAM-dependent_MTases;SNF2_N	adenyl nucleotide binding;adenyl ribonucleotide binding;ATP binding;binding;DNA binding;nucleic acid binding;nucleotide binding;purine nucleotide binding;purine ribonucleoside triphosphate binding;purine ribonucleotide binding;ribonucleotide binding		PF00145;PF00176;PF00271
Q5ASA5	set2 ANIA_08825		x		x	x	x			1.05836	1.25444	N	Histone-lysine N-methyltransferase, H3 lysine-36 specific	SET;SRI	IPR001202;IPR001214;IPR003616;IPR006560;IPR013257;IPR025788	AWS_dom;Hist-Lys_N-MeTrfase_SET2_fun;Post-SET_dom;SET_dom;SRI;WW_dom	catalytic activity;histone methyltransferase activity;histone methyltransferase activity (H3-K36 specific);histone-lysine N-methyltransferase activity;lysine N-methyltransferase activity;methyltransferase activity;N-methyltransferase activity;protein methyltransferase activity;protein-lysine N-methyltransferase activity;S-adenosylmethionine-dependent methyltransferase activity;transferase activit…	PS01159;PS50020;PS50280;PS50868;PS51215;PS51568
Q5B036	ANIA_06094		x		x	x	x			1.18922	1.13903		Thiol methyltransferase, putative (AFU_orthologue AFUA_4G13570)	TPMT	IPR008854;IPR029063	SAM-dependent_MTases;TPMT	thiopurine S-methyltransferase activity [GO:0008119]	PS51585	PF05724
C8V1Q1	ANIA_06713		x		x	x	x			1.50672	1.11571		DUF890 domain protein (AFU_orthologue AFUA_7G05590)	Methyltransf_10	IPR010286;IPR029063	rRNA_lsu_MeTfrase_F-like;SAM-dependent_MTases	23S rRNA (adenine(1618)-N(6))-methyltransferase activity [GO:0052907]		PF05971
C8VAQ8	ANIA_04764		x		x		x				1.10252	N	Histone-lysine N-methyltransferase	SET	IPR001214;IPR003616;IPR006560	AWS_dom;Post-SET_dom;SET_dom	catalytic activity;histone methyltransferase activity;histone-lysine N-methyltransferase activity;lysine N-methyltransferase activity;methyltransferase activity;N-methyltransferase activity;protein methyltransferase activity;protein-lysine N-methyltransferase activity;S-adenosylmethionine-dependent methyltransferase activity;transferase activity;transferase activity, transferring one-carbon groups	PS50280;PS50868;PS51215	PF00856;PF17907
C8V0A9	ANIA_10829		x		x		x				1.10095		MTS domain-containing protein	MTS	IPR002052;IPR029063	DNA_methylase_N6_adenine_CS;SAM-dependent_MTases	binding;catalytic activity;methyltransferase activity;nucleic acid binding;S-adenosylmethionine-dependent methyltransferase activity;transferase activity;transferase activity, transferring one-carbon groups	PS00092	PF05175
Q5ASK9	trm44 AN8721		x		x	x	x			1.28645	1.09631		tRNA (uracil-O(2)-)-methyltransferase (EC 2.1.1.211)	AdoMet_MTase	IPR011671	tRNA_uracil_MeTrfase	tRNA (uracil) methyltransferase activity [GO:0016300]		PF07757
C8VCZ0	ANIA_10909	x			x		x		13.9714				Methyltransf_25 domain-containing protein		IPR023149;IPR029063	SAM-dependent_MTases;Trans_acon_MeTrfase_C
C8VFV1	ANIA_10700	x			x		x		2.69398				DlpA domain protein (AFU_orthologue AFUA_4G10940)	Methyltransf_6	IPR005493	RNase_E_inh/diMeMenaQ_MeTrfase
C8VJU3	ANIA_09193	x			x		x		3.31951				LaeA-like methyltransferase, putative (AFU_orthologue AFUA_2G04380)		IPR029063	SAM-dependent_MTases
C8VN06	ANIA_01566	x			x		x		5.89781				Methyltransf_25 domain-containing protein	Methyltransf_11	IPR013216;IPR029063	Methyltransf_11;SAM-dependent_MTases
C8VQ72	mdpA ANIA_10021		x		x	x			2.11753	1.22847			Monodictyphenone cluster transcriptional coactivator mdpA (Monodictyphenone synthesis protein A)		IPR011991;IPR029063	SAM-dependent_MTases;WHTH_DNA-bd_dom	DNA binding [GO:0003677]
C8VQ78	ANIA_00141		x		x	x				1.35999			tRNA methyltransferase (Eurofung)	tRNA_U5-meth_tr	IPR010280;IPR012340;IPR025795;IPR029063;IPR030390;IPR030391	MeTrfase_TrmA_AS;MeTrfase_TrmA_CS;NA-bd_OB-fold;SAM-dependent_MTases;tRNA_(uracil-5-)_MeTrfase;U5_MeTrfase_fam	S-adenosylmethionine-dependent tRNA (m5U54) methyltransferase activity [GO:0030697];tRNA (m5U54) methyltransferase activity [GO:0030696]	PS01230;PS01231;PS51622;PS51687	PF05958
C8VRU2	ANIA_10189	x			x	x		1.29038					DUF431 domain protein (AFU_orthologue AFUA_1G08950)	RNA_Me_trans	IPR007364	SAM-dep_RNA_MeTrfase_prd
Q5AQN1	ANIA_09399		x		x	x				1.06545		N	Histone-lysine N-methyltransferase (Bre2), putative (AFU_orthologue AFUA_3G04120)		IPR001870;IPR013320	B30.2/SPRY;ConA-like_dom	methyltransferase activity [GO:0008168];transcription regulatory region DNA binding [GO:0044212]	PS50188
Q5AS81	ANIA_08849		x		x	x				1.346			DUF2431 domain-containing protein	DUF2431	IPR019446	DUF2431	rRNA (uridine-N3-)-methyltransferase activity [GO:0070042]		PF10354
Q5AT88	ANIA_08492	x		x		x	x						Uncharacterized protein	Methyltransf_23	IPR029063	SAM-dependent_MTases			PF13489
Q5AZ33	ANIA_06447		x		x	x				2.3098		O	O-methyltransferase, putative (AFU_orthologue AFUA_4G14580)	Methyltransf_2	IPR001077;IPR011991;IPR016461;IPR029063	O_MeTrfase_2;O-MeTrfase_COMT;SAM-dependent_MTases;WHTH_DNA-bd_dom	O-methyltransferase activity [GO:0008171]	PS51683	PF00891
Q5B089	ANIA_06041	x			x		x		1.89497				Protein arginine methyltransferase NDUFAF7 (EC 2.1.1.320)	Methyltransf_28	IPR003788;IPR029063	MidA;SAM-dependent_MTases
Q5B192	ANIA_05688	x			x		x		1.33				Cyclopropane-fatty-acyl-phospholipid synthase, putative (AFU_orthologue AFUA_7G04190)	CMAS	IPR003333;IPR029063	Mycolic_cyclopropane_synthase;SAM-dependent_MTases
Q5B1F0	ANIA_05630		x		x	x				1.2396		N	SET domain protein (AFU_orthologue AFUA_4G11040)				protein-lysine N-methyltransferase activity [GO:0016279]		PF00856
Q5B3G2	ANIA_04918		x		x	x				1.07525			Methyltransf_11 domain-containing protein	Methyltransf_11	IPR013216;IPR029063	Methyltransf_11;SAM-dependent_MTases	catalytic activity;methyltransferase activity;transferase activity;transferase activity, transferring one-carbon groups
Q5B467	ANIA_04663		x		x	x				1.09703			Spermine/spermidine synthase family protein	Spermine_synth	IPR001045;IPR029063	SAM-dependent_MTases;Spermi_synthase	catalytic activity
Q5BA21	ANIA_02609		x		x	x				1.85429		O	Methyltransf_2 domain-containing protein	Methyltransf_2	IPR001077;IPR011991;IPR016461;IPR029063	O_MeTrfase_2;O-MeTrfase_COMT;SAM-dependent_MTases;WHTH_DNA-bd_dom	O-methyltransferase activity [GO:0008171]	PS51683	PF00891
Q5BBC6	choA AN2154		x	x		x							Phosphatidylethanolamine N-methyltransferase (PE methyltransferase) (PEAMT) (PEMT) (EC 2.1.1.17)	PEMT	IPR007318;IPR016219	Phopholipid_MeTrfase;Phosphatid-EA_MeTrfase_fun	phosphatidylethanolamine N-methyltransferase activity [GO:0004608]	PS51598	PF04191
Q9Y7B6	AN1778		x		x	x	x			1.17688			3-methyl-2-oxobutanoate hydroxymethyltransferase (EC 2.1.2.11) (Ketopantoate hydroxymethyltransferase)	Pantoate_transf	IPR003700;IPR015813	Pantoate_hydroxy_MeTrfase;Pyrv/PenolPyrv_Kinase-like_dom	3-methyl-2-oxobutanoate hydroxymethyltransferase activity [GO:0003864];magnesium ion binding [GO:0000287]		PF02548
