# Supplementary material for: A seven-transmembrane methyltransferase catalysing N-terminal histidine methylation of lytic polysaccharide monooxygenases
Source: Research Square preprint supplement (doi:10.21203/rs.3.rs-2289157/v1), 2022-12-21
Supplement: Supplementary file 3 [file 4d7c584265c0a314a1532132.xlsx]

## Sheet: mainAnnot.emericella_nidulans_(
UniProt	Mtase	GOBP name	GOMF name	GOCC name	GOBP slim name	GOCC slim name	KEGG name	Pfam	GSEA	Keywords	Corum	GOBP	GOMF	GOCC	GOBP slim	GOCC slim	ENSG	ENSP	ENST	Isoform ID	Flybase	Gene name	Interpro	Interpro name	KEGG	MGI	MIM	PDB	Pfam	PRINTS	PRINTS name	Prosite	Prosite name	Protein name	Reactome	SGD	SMART	SMART name	Taxonomy	UniProt names	WormBase	EC	eggNOG
Q5BH89;C8VQY5	+	cell cycle checkpoint;DNA damage checkpoint;recombinational repair;nucleobase-containing compound metabolic process;DNA metabolic process;DNA repair;nucleotide-excision repair;postreplication repair;DNA recombination;chromatin silencing;chromatin silencing at telomere;transcription, DNA-dependent;regulation of transcription, DNA-dependent;nitrogen compound metabolic process;response to stress;res…	catalytic activity;methyltransferase activity;N-methyltransferase activity;protein methyltransferase activity;S-adenosylmethionine-dependent methyltransferase activity;lysine N-methyltransferase activity;protein-lysine N-methyltransferase activity;transferase activity;transferase activity, transferring one-carbon groups;histone-lysine N-methyltransferase activity;histone methyltransferase activit…	nucleus;organelle;membrane-bounded organelle;intracellular organelle;intracellular membrane-bounded organelle;intracellular part;cell part	nucleobase-containing compound metabolic process;DNA metabolic process;DNA repair;DNA recombination;nitrogen compound metabolic process;response to stress;response to DNA damage stimulus;metabolic process;biosynthetic process;cellular process;RNA metabolic process;gene silencing;cellular nitrogen compound metabolic process;regulation of gene expression, epigenetic;macromolecule metabolic process;…	nucleus;organelle;intracellular organelle;intracellular membrane-bounded organelle;cell part	Lysine degradation	DOT1		Chromatinregulator;Completeproteome;Methyltransferase;Nucleus;Referenceproteome;Repeat;S-adenosyl-L-methionine;Transcription;Transcriptionregulation;Transferase		GO:0000075;GO:0000077;GO:0000725;GO:0006139;GO:0006259;GO:0006281;GO:0006289;GO:0006301;GO:0006310;GO:0006342;GO:0006348;GO:0006351;GO:0006355;GO:0006807;GO:0006950;GO:0006974;GO:0008152;GO:0009058;GO:0009059;GO:0009889;GO:0009890;GO:0009892;GO:0009987;GO:0010468;GO:0010556;GO:0010558;GO:0010564;GO:0010605;GO:0010629;GO:0010948;GO:0016070;GO:0016458;GO:0019219;GO:0019222;GO:0031323;GO:0031324;GO:…	GO:0003824;GO:0008168;GO:0008170;GO:0008276;GO:0008757;GO:0016278;GO:0016279;GO:0016740;GO:0016741;GO:0018024;GO:0031151;GO:0042054	GO:0005634;GO:0043226;GO:0043227;GO:0043229;GO:0043231;GO:0044424;GO:0044464	GO:0006139;GO:0006259;GO:0006281;GO:0006310;GO:0006807;GO:0006950;GO:0006974;GO:0008152;GO:0009058;GO:0009987;GO:0016070;GO:0016458;GO:0034641;GO:0040029;GO:0043170;GO:0044237;GO:0044238;GO:0050896;GO:0051726;GO:0065007	GO:0005634;GO:0043226;GO:0043229;GO:0043231;GO:0044464	CADANIAG00002659	CADANIAP00002659	CADANIAT00002659			dot1	IPR021162;IPR025789;IPR013110;IPR030445;IPR029063	Dot1;DOT1_dom;DOT1_dom_Pfam;H3-K79_meTrfase;SAM-dependent_MTases	ko00310				PF08123			PS51569	DOT1	Histone-lysine N-methyltransferase, H3 lysine-79 specific					Emericella nidulans (strain FGSC A4 / ATCC 38163 / CBS 112.46 / NRRL 194 / M139)	DOT1_EMENI		2.1.1.43	NOG294902
Q5AZY3;C8V2A8	+	chromatin silencing;regulation of transcription, DNA-dependent;protein localization;regulation of biosynthetic process;negative regulation of biosynthetic process;negative regulation of metabolic process;cellular process;regulation of gene expression;regulation of macromolecule biosynthetic process;negative regulation of macromolecule biosynthetic process;negative regulation of macromolecule meta…	catalytic activity;methyltransferase activity;N-methyltransferase activity;protein methyltransferase activity;S-adenosylmethionine-dependent methyltransferase activity;lysine N-methyltransferase activity;protein-lysine N-methyltransferase activity;transferase activity;transferase activity, transferring one-carbon groups;histone-lysine N-methyltransferase activity;histone methyltransferase activit…	nucleus;chromosome;cytosol;cell division site;organelle;membrane-bounded organelle;non-membrane-bounded organelle;intracellular organelle;intracellular membrane-bounded organelle;intracellular non-membrane-bounded organelle;intracellular part;cytoplasmic part;cell part	cellular process;gene silencing;regulation of gene expression, epigenetic;localization;cellular localization;biological regulation	nucleus;chromosome;cytosol;cell division site;organelle;intracellular organelle;intracellular membrane-bounded organelle;intracellular non-membrane-bounded organelle;cell part	Lysine degradation	SET		Chromatinregulator;Chromosome;Completeproteome;Methyltransferase;Nucleus;Referenceproteome;S-adenosyl-L-methionine;Transferase		GO:0006342;GO:0006355;GO:0008104;GO:0009889;GO:0009890;GO:0009892;GO:0009987;GO:0010468;GO:0010556;GO:0010558;GO:0010605;GO:0010629;GO:0016458;GO:0019219;GO:0019222;GO:0031323;GO:0031324;GO:0031326;GO:0031327;GO:0033036;GO:0034613;GO:0040029;GO:0045814;GO:0045892;GO:0045934;GO:0048519;GO:0048523;GO:0050789;GO:0050794;GO:0051171;GO:0051172;GO:0051179;GO:0051252;GO:0051253;GO:0051641;GO:0060255;GO:…	GO:0003824;GO:0008168;GO:0008170;GO:0008276;GO:0008757;GO:0016278;GO:0016279;GO:0016740;GO:0016741;GO:0018024;GO:0042054;GO:0042799	GO:0005634;GO:0005694;GO:0005829;GO:0032153;GO:0043226;GO:0043227;GO:0043228;GO:0043229;GO:0043231;GO:0043232;GO:0044424;GO:0044444;GO:0044464	GO:0009987;GO:0016458;GO:0040029;GO:0051179;GO:0051641;GO:0065007	GO:0005634;GO:0005694;GO:0005829;GO:0032153;GO:0043226;GO:0043229;GO:0043231;GO:0043232;GO:0044464	CADANIAG00006863	CADANIAP00006863	CADANIAT00006863			set9	IPR025783;IPR001214	Hist-Lys_N-MeTrfase_SET9;SET_dom	ko00310				PF00856			PS51567;PS50280	SAM_MT43_SUVAR420_1;SET	Histone-lysine N-methyltransferase set9			SM00317	SET	Emericella nidulans (strain FGSC A4 / ATCC 38163 / CBS 112.46 / NRRL 194 / M139)	SET9_EMENI		2.1.1.43	NOG325204
Q5BAD0;C8VPH9	+	chromatin silencing at rDNA;nucleobase-containing compound metabolic process;chromatin silencing;regulation of transcription, DNA-dependent;coenzyme metabolic process;oxidoreduction coenzyme metabolic process;nucleoside phosphate metabolic process;nicotinamide metabolic process;nitrogen compound metabolic process;metabolic process;nucleotide metabolic process;alkaloid metabolic process;regulation…	catalytic activity;methyltransferase activity;S-adenosylmethionine-dependent methyltransferase activity;transferase activity;transferase activity, transferring one-carbon groups	cytosol;intracellular part;cytoplasmic part;cell part	nucleobase-containing compound metabolic process;nitrogen compound metabolic process;metabolic process;nucleotide metabolic process;cellular process;gene silencing;cellular nitrogen compound metabolic process;regulation of gene expression, epigenetic;cellular amide metabolic process;cellular metabolic process;primary metabolic process;small molecule metabolic process;heterocycle metabolic process…	cytosol;cell part		Methyltransf_16		Completeproteome;Cytoplasm;Methyltransferase;Referenceproteome;S-adenosyl-L-methionine;Transferase		GO:0000183;GO:0006139;GO:0006342;GO:0006355;GO:0006732;GO:0006733;GO:0006753;GO:0006769;GO:0006807;GO:0008152;GO:0009117;GO:0009820;GO:0009889;GO:0009890;GO:0009892;GO:0009987;GO:0010468;GO:0010556;GO:0010558;GO:0010605;GO:0010629;GO:0016458;GO:0019219;GO:0019222;GO:0019362;GO:0031323;GO:0031324;GO:0031326;GO:0031327;GO:0034641;GO:0040029;GO:0043603;GO:0044237;GO:0044238;GO:0044281;GO:0045814;GO:…	GO:0003824;GO:0008168;GO:0008757;GO:0016740;GO:0016741	GO:0005829;GO:0044424;GO:0044444;GO:0044464	GO:0006139;GO:0006807;GO:0008152;GO:0009117;GO:0009987;GO:0016458;GO:0034641;GO:0040029;GO:0043603;GO:0044237;GO:0044238;GO:0044281;GO:0046483;GO:0051186;GO:0055086;GO:0065007	GO:0005829;GO:0044464	CADANIAG00009225	CADANIAP00009225	CADANIAT00009225			nnt1	IPR019410;IPR025784;IPR029063	Nicotinamide_N-MeTfrase-like;Nicotinamide_N-MeTfrase_put;SAM-dependent_MTases					PF10294			PS51560	SAM_MT_NNT1	Protein N-methyltransferase nnt1					Emericella nidulans (strain FGSC A4 / ATCC 38163 / CBS 112.46 / NRRL 194 / M139)	NNT1_EMENI		2.1.1.-	COG3897
Q9Y7B6;C8VPD6;Q5BCF2	+	organic acid metabolic process;cellular amino acid metabolic process;cellular modified amino acid metabolic process;coenzyme metabolic process;vitamin metabolic process;water-soluble vitamin metabolic process;nitrogen compound metabolic process;metabolic process;cellular amino acid biosynthetic process;biosynthetic process;coenzyme biosynthetic process;vitamin biosynthetic process;amine metabolic…	catalytic activity;3-methyl-2-oxobutanoate hydroxymethyltransferase activity;transferase activity;transferase activity, transferring one-carbon groups;hydroxymethyl-, formyl- and related transferase activity	mitochondrion;organelle;membrane-bounded organelle;intracellular organelle;intracellular membrane-bounded organelle;intracellular part;cytoplasmic part;cell part	organic acid metabolic process;cellular amino acid metabolic process;vitamin metabolic process;nitrogen compound metabolic process;metabolic process;biosynthetic process;amine metabolic process;cellular process;cellular nitrogen compound metabolic process;cellular ketone metabolic process;cellular metabolic process;primary metabolic process;small molecule metabolic process;cofactor metabolic proc…	mitochondrion;organelle;intracellular organelle;intracellular membrane-bounded organelle;cell part	Pantothenate and CoA biosynthesis	Pantoate_transf		Completeproteome;Pantothenatebiosynthesis;Referenceproteome;Transferase		GO:0006082;GO:0006520;GO:0006575;GO:0006732;GO:0006766;GO:0006767;GO:0006807;GO:0008152;GO:0008652;GO:0009058;GO:0009108;GO:0009110;GO:0009308;GO:0009309;GO:0009987;GO:0015939;GO:0015940;GO:0016053;GO:0019752;GO:0034641;GO:0042180;GO:0042364;GO:0042398;GO:0043436;GO:0044106;GO:0044237;GO:0044238;GO:0044249;GO:0044271;GO:0044281;GO:0044283;GO:0046394;GO:0051186;GO:0051188	GO:0003824;GO:0003864;GO:0016740;GO:0016741;GO:0016742	GO:0005739;GO:0043226;GO:0043227;GO:0043229;GO:0043231;GO:0044424;GO:0044444;GO:0044464	GO:0006082;GO:0006520;GO:0006766;GO:0006807;GO:0008152;GO:0009058;GO:0009308;GO:0009987;GO:0034641;GO:0042180;GO:0044237;GO:0044238;GO:0044281;GO:0051186	GO:0005739;GO:0043226;GO:0043229;GO:0043231;GO:0044464	CADANIAG00008425	CADANIAP00008425	CADANIAT00008425			panB	IPR003700;IPR015813	Pantoate_hydroxy_MeTrfase;Pyrv/PenolPyrv_Kinase-like_dom	ko00770				PF02548					3-methyl-2-oxobutanoate hydroxymethyltransferase					Emericella nidulans (strain FGSC A4 / ATCC 38163 / CBS 112.46 / NRRL 194 / M139)	PANB_EMENI		2.1.2.11	COG0413
Q5AQJ2;C8VRB1	+	protein complex assembly;regulation of catabolic process;cellular process;regulation of autophagy;cellular component organization;regulation of metabolic process;cellular component assembly;regulation of cellular metabolic process;regulation of cellular catabolic process;cellular macromolecular complex subunit organization;cellular macromolecular complex assembly;cellular protein complex assembly…	catalytic activity;protein C-terminal carboxyl O-methyltransferase activity;methyltransferase activity;O-methyltransferase activity;protein methyltransferase activity;S-adenosylmethionine-dependent methyltransferase activity;carboxyl-O-methyltransferase activity;transferase activity;transferase activity, transferring one-carbon groups;protein C-terminal leucine carboxyl O-methyltransferase activi…	mitochondrion;organelle;membrane-bounded organelle;intracellular organelle;intracellular membrane-bounded organelle;intracellular part;cytoplasmic part;cell part	protein complex assembly;cellular process;cellular component organization;cellular component assembly;cellular macromolecular complex assembly;macromolecular complex assembly;biological regulation	mitochondrion;organelle;intracellular organelle;intracellular membrane-bounded organelle;cell part	Histidine metabolism;Tyrosine metabolism;Polycyclic aromatic hydrocarbon degradation	LCM		Completeproteome;Methyltransferase;Referenceproteome;S-adenosyl-L-methionine;Transferase		GO:0006461;GO:0009894;GO:0009987;GO:0010506;GO:0016043;GO:0019222;GO:0022607;GO:0031323;GO:0031329;GO:0034621;GO:0034622;GO:0043623;GO:0043933;GO:0050789;GO:0050794;GO:0065003;GO:0065007;GO:0071822;GO:0071840;GO:0071841;GO:0071842;GO:0071844	GO:0003824;GO:0003880;GO:0008168;GO:0008171;GO:0008276;GO:0008757;GO:0010340;GO:0016740;GO:0016741;GO:0018423;GO:0051998	GO:0005739;GO:0043226;GO:0043227;GO:0043229;GO:0043231;GO:0044424;GO:0044444;GO:0044464	GO:0006461;GO:0009987;GO:0016043;GO:0022607;GO:0034622;GO:0065003;GO:0065007	GO:0005739;GO:0043226;GO:0043229;GO:0043231;GO:0044464	CADANIAG00001940	CADANIAP00001940	CADANIAT00001940			ppm1	IPR007213;IPR016651;IPR029063	LCM_MeTrfase;Leu_CO_MeTrfase_LCMT1;SAM-dependent_MTases	ko00340;ko00350;ko00624				PF04072					Leucine carboxyl methyltransferase 1					Emericella nidulans (strain FGSC A4 / ATCC 38163 / CBS 112.46 / NRRL 194 / M139)	LCMT1_EMENI		2.1.1.233	NOG329644
Q5ASA5;C8V9K8	+	reproduction;regulation of DNA recombination;developmental process involved in reproduction;nucleobase-containing compound metabolic process;regulation of DNA replication;chromatin organization;transcription termination, DNA-dependent;transcription elongation, DNA-dependent;regulation of transcription, DNA-dependent;transcription elongation from RNA polymerase II promoter;protein modification pro…	catalytic activity;methyltransferase activity;N-methyltransferase activity;protein methyltransferase activity;S-adenosylmethionine-dependent methyltransferase activity;lysine N-methyltransferase activity;protein-lysine N-methyltransferase activity;transferase activity;transferase activity, transferring one-carbon groups;histone-lysine N-methyltransferase activity;histone methyltransferase activit…	chromosome;cytosol;DNA-directed RNA polymerase II, holoenzyme;macromolecular complex;organelle;non-membrane-bounded organelle;intracellular organelle;intracellular non-membrane-bounded organelle;protein complex;organelle part;intracellular part;nuclear part;cytoplasmic part;intracellular organelle part;nucleoplasm part;cell part	reproduction;nucleobase-containing compound metabolic process;chromatin organization;transcription termination, DNA-dependent;transcription elongation, DNA-dependent;protein modification process;nitrogen compound metabolic process;organelle organization;metabolic process;biosynthetic process;cellular process;cellular component organization;RNA metabolic process;chromatin modification;histone modi…	chromosome;cytosol;DNA-directed RNA polymerase II, holoenzyme;macromolecular complex;organelle;intracellular organelle;intracellular non-membrane-bounded organelle;protein complex;cell part	Lysine degradation	SET;SRI		Chromosome;Completeproteome;Methyltransferase;Nucleus;Referenceproteome;Repressor;S-adenosyl-L-methionine;Transcription;Transcriptionregulation;Transferase		GO:0000003;GO:0000018;GO:0003006;GO:0006139;GO:0006275;GO:0006325;GO:0006353;GO:0006354;GO:0006355;GO:0006368;GO:0006464;GO:0006476;GO:0006807;GO:0006996;GO:0008152;GO:0009058;GO:0009889;GO:0009890;GO:0009892;GO:0009893;GO:0009987;GO:0010468;GO:0010520;GO:0010556;GO:0010558;GO:0010564;GO:0010604;GO:0010605;GO:0010629;GO:0010638;GO:0010639;GO:0010948;GO:0016043;GO:0016070;GO:0016568;GO:0016569;GO:…	GO:0003824;GO:0008168;GO:0008170;GO:0008276;GO:0008757;GO:0016278;GO:0016279;GO:0016740;GO:0016741;GO:0018024;GO:0042054;GO:0046975	GO:0005694;GO:0005829;GO:0016591;GO:0032991;GO:0043226;GO:0043228;GO:0043229;GO:0043232;GO:0043234;GO:0044422;GO:0044424;GO:0044428;GO:0044444;GO:0044446;GO:0044451;GO:0044464	GO:0000003;GO:0006139;GO:0006325;GO:0006353;GO:0006354;GO:0006464;GO:0006807;GO:0006996;GO:0008152;GO:0009058;GO:0009987;GO:0016043;GO:0016070;GO:0016568;GO:0016570;GO:0019538;GO:0030154;GO:0030437;GO:0031399;GO:0032502;GO:0033043;GO:0034641;GO:0043170;GO:0043412;GO:0043934;GO:0044237;GO:0044238;GO:0048468;GO:0048646;GO:0048856;GO:0051052;GO:0051276;GO:0051726;GO:0065007	GO:0005694;GO:0005829;GO:0016591;GO:0032991;GO:0043226;GO:0043229;GO:0043232;GO:0043234;GO:0044464	CADANIAG00006232	CADANIAP00006232	CADANIAT00006232			set2	IPR006560;IPR025788;IPR003616;IPR001214;IPR013257;IPR001202	AWS_dom;Hist-Lys_N-MeTrfase_SET2_fun;Post-SET_dom;SET_dom;SRI;WW_dom	ko00310				PF00856;PF08236			PS51215;PS50868;PS51568;PS50280;PS01159;PS50020	AWS;POST_SET;SAM_MT43_SET2_1;SET;WW_DOMAIN_1;WW_DOMAIN_2	Histone-lysine N-methyltransferase, H3 lysine-36 specific			SM00570;SM00508;SM00317	AWS;PostSET;SET	Emericella nidulans (strain FGSC A4 / ATCC 38163 / CBS 112.46 / NRRL 194 / M139)	SET2_EMENI		2.1.1.43	COG2940
Q5BH88;C8VQY4	+	rRNA modification;rRNA 2'-O-methylation;enzyme-directed rRNA 2'-O-methylation;maturation of 5.8S rRNA;maturation of LSU-rRNA from tricistronic rRNA transcript (SSU-rRNA, 5.8S rRNA, LSU-rRNA);maturation of 5.8S rRNA from tricistronic rRNA transcript (SSU-rRNA, 5.8S rRNA, LSU-rRNA);maturation of LSU-rRNA;RNA methylation;nucleobase-containing compound metabolic process;rRNA processing;RNA processing…	catalytic activity;methyltransferase activity;O-methyltransferase activity;RNA methyltransferase activity;rRNA methyltransferase activity;rRNA (uridine-2'-O-)-methyltransferase activity;S-adenosylmethionine-dependent methyltransferase activity;rRNA (guanine) methyltransferase activity;rRNA (uridine) methyltransferase activity;transferase activity;transferase activity, transferring one-carbon grou…	nucleolus;ribonucleoprotein complex;preribosome;preribosome, large subunit precursor;macromolecular complex;organelle;non-membrane-bounded organelle;intracellular organelle;intracellular non-membrane-bounded organelle;organelle part;intracellular part;nuclear part;intracellular organelle part;cell part	nucleobase-containing compound metabolic process;rRNA processing;RNA processing;one-carbon metabolic process;nitrogen compound metabolic process;metabolic process;RNA modification;cellular process;RNA metabolic process;cellular nitrogen compound metabolic process;macromolecule metabolic process;macromolecule modification;cellular metabolic process;primary metabolic process;small molecule metaboli…	nucleolus;ribonucleoprotein complex;preribosome;macromolecular complex;organelle;intracellular organelle;intracellular non-membrane-bounded organelle;cell part		DUF3381;FtsJ;Spb1_C		Completeproteome;Methyltransferase;Nucleus;Referenceproteome;Ribosomebiogenesis;rRNAprocessing;S-adenosyl-L-methionine;Transferase		GO:0000154;GO:0000451;GO:0000453;GO:0000460;GO:0000463;GO:0000466;GO:0000470;GO:0001510;GO:0006139;GO:0006364;GO:0006396;GO:0006730;GO:0006807;GO:0008152;GO:0009451;GO:0009987;GO:0016070;GO:0016072;GO:0031167;GO:0032259;GO:0034470;GO:0034641;GO:0034660;GO:0043170;GO:0043412;GO:0043414;GO:0044237;GO:0044238;GO:0044260;GO:0044281;GO:0090304	GO:0003824;GO:0008168;GO:0008171;GO:0008173;GO:0008649;GO:0008650;GO:0008757;GO:0016435;GO:0016436;GO:0016740;GO:0016741;GO:0070039	GO:0005730;GO:0030529;GO:0030684;GO:0030687;GO:0032991;GO:0043226;GO:0043228;GO:0043229;GO:0043232;GO:0044422;GO:0044424;GO:0044428;GO:0044446;GO:0044464	GO:0006139;GO:0006364;GO:0006396;GO:0006730;GO:0006807;GO:0008152;GO:0009451;GO:0009987;GO:0016070;GO:0034641;GO:0043170;GO:0043412;GO:0044237;GO:0044238;GO:0044281	GO:0005730;GO:0030529;GO:0030684;GO:0032991;GO:0043226;GO:0043229;GO:0043232;GO:0044464	CADANIAG00002658	CADANIAP00002658	CADANIAT00002658			spb1	IPR015507;IPR012920;IPR024576;IPR002877;IPR029063;IPR028589	rRNA-MeTfrase_E;rRNA_MeTfrase_Spb1_C;rRNA_MeTfrase_Spb1_DUF3381;rRNA_MeTrfase_FtsJ_dom;SAM-dependent_MTases;Spb1					PF11861;PF01728;PF07780					AdoMet-dependent rRNA methyltransferase spb1					Emericella nidulans (strain FGSC A4 / ATCC 38163 / CBS 112.46 / NRRL 194 / M139)	SPB1_EMENI		2.1.1.-	COG0293
Q5BBC6	+	alcohol metabolic process;cellular biogenic amine metabolic process;lipid metabolic process;phospholipid metabolic process;glycerophospholipid metabolic process;phosphatidylcholine biosynthetic process;nitrogen compound metabolic process;metabolic process;lipid biosynthetic process;phospholipid biosynthetic process;biosynthetic process;amine metabolic process;cellular process;organophosphate meta…	catalytic activity;phosphatidylethanolamine N-methyltransferase activity;methyltransferase activity;N-methyltransferase activity;S-adenosylmethionine-dependent methyltransferase activity;transferase activity;transferase activity, transferring one-carbon groups	integral to membrane;intrinsic to membrane;membrane part;cell part	alcohol metabolic process;lipid metabolic process;nitrogen compound metabolic process;metabolic process;biosynthetic process;amine metabolic process;cellular process;cellular nitrogen compound metabolic process;cellular metabolic process;primary metabolic process;cellular lipid metabolic process;small molecule metabolic process	cell part	Glycerophospholipid metabolism	PEMT		Completeproteome;Lipidbiosynthesis;Lipidmetabolism;Membrane;Methyltransferase;Phospholipidbiosynthesis;Phospholipidmetabolism;Referenceproteome;S-adenosyl-L-methionine;Transferase;Transmembrane;Transmembranehelix		GO:0006066;GO:0006576;GO:0006629;GO:0006644;GO:0006650;GO:0006656;GO:0006807;GO:0008152;GO:0008610;GO:0008654;GO:0009058;GO:0009308;GO:0009987;GO:0019637;GO:0034641;GO:0042439;GO:0044106;GO:0044237;GO:0044238;GO:0044249;GO:0044255;GO:0044281;GO:0045017;GO:0046470;GO:0046474;GO:0046486	GO:0003824;GO:0004608;GO:0008168;GO:0008170;GO:0008757;GO:0016740;GO:0016741	GO:0016021;GO:0031224;GO:0044425;GO:0044464	GO:0006066;GO:0006629;GO:0006807;GO:0008152;GO:0009058;GO:0009308;GO:0009987;GO:0034641;GO:0044237;GO:0044238;GO:0044255;GO:0044281	GO:0044464						cho2	IPR007318;IPR016219	Phopholipid_MeTrfase;Phosphatid-EA_MeTrfase_fun	ko00564				PF04191			PS51598	SAM_CHO2	Phosphatidylethanolamine N-methyltransferase					Emericella nidulans (strain FGSC A4 / ATCC 38163 / CBS 112.46 / NRRL 194 / M139)	CHO2_EMENI		2.1.1.17
Q5ASK9;C8VA24	+		catalytic activity;methyltransferase activity;RNA methyltransferase activity;tRNA methyltransferase activity;tRNA (uracil) methyltransferase activity;transferase activity;transferase activity, transferring one-carbon groups	nucleus;cytosol;organelle;membrane-bounded organelle;intracellular organelle;intracellular membrane-bounded organelle;intracellular part;cytoplasmic part;cell part		nucleus;cytosol;organelle;intracellular organelle;intracellular membrane-bounded organelle;cell part		AdoMet_MTase		Completeproteome;Cytoplasm;Methyltransferase;Referenceproteome;S-adenosyl-L-methionine;Transferase;tRNAprocessing			GO:0003824;GO:0008168;GO:0008173;GO:0008175;GO:0016300;GO:0016740;GO:0016741	GO:0005634;GO:0005829;GO:0043226;GO:0043227;GO:0043229;GO:0043231;GO:0044424;GO:0044444;GO:0044464		GO:0005634;GO:0005829;GO:0043226;GO:0043229;GO:0043231;GO:0044464	CADANIAG00006348	CADANIAP00006348	CADANIAT00006348			trm44	IPR011671	tRNA_uracil_MeTrfase					PF07757					tRNA (uracil-O(2)-)-methyltransferase					Emericella nidulans (strain FGSC A4 / ATCC 38163 / CBS 112.46 / NRRL 194 / M139)	TRM44_EMENI		2.1.1.211	NOG259667
Q5B0Y5;C8VFD2	+	reproduction;telomere maintenance;developmental process involved in reproduction;nucleobase-containing compound metabolic process;DNA metabolic process;chromatin silencing;chromatin silencing at telomere;regulation of transcription, DNA-dependent;regulation of transcription from RNA polymerase II promoter;protein modification process;protein methylation;one-carbon metabolic process;nitrogen compo…	nucleotide binding;nucleic acid binding;RNA binding;catalytic activity;binding;methyltransferase activity;N-methyltransferase activity;protein methyltransferase activity;S-adenosylmethionine-dependent methyltransferase activity;lysine N-methyltransferase activity;protein-lysine N-methyltransferase activity;transferase activity;transferase activity, transferring one-carbon groups;histone-lysine N-…	chromosome;cytoplasm;chromatin remodeling complex;macromolecular complex;methyltransferase complex;histone methyltransferase complex;organelle;non-membrane-bounded organelle;intracellular organelle;intracellular non-membrane-bounded organelle;protein complex;organelle part;intracellular part;nuclear part;intracellular organelle part;nucleoplasm part;cell part;Set1C/COMPASS complex	reproduction;nucleobase-containing compound metabolic process;DNA metabolic process;protein modification process;one-carbon metabolic process;nitrogen compound metabolic process;response to stress;organelle organization;metabolic process;protein alkylation;cellular process;cellular component organization;gene silencing;peptidyl-amino acid modification;protein metabolic process;cell differentiatio…	chromosome;cytoplasm;chromatin remodeling complex;macromolecular complex;histone methyltransferase complex;organelle;intracellular organelle;intracellular non-membrane-bounded organelle;protein complex;cell part	Lysine degradation	N-SET;RRM_1;SET;SET_assoc		Chromatinregulator;Chromosome;Completeproteome;Methyltransferase;Nucleus;Referenceproteome;S-adenosyl-L-methionine;Transferase		GO:0000003;GO:0000723;GO:0003006;GO:0006139;GO:0006259;GO:0006342;GO:0006348;GO:0006355;GO:0006357;GO:0006464;GO:0006479;GO:0006730;GO:0006807;GO:0006950;GO:0006996;GO:0008152;GO:0008213;GO:0009889;GO:0009890;GO:0009892;GO:0009893;GO:0009987;GO:0010468;GO:0010556;GO:0010558;GO:0010604;GO:0010605;GO:0010629;GO:0010638;GO:0016043;GO:0016458;GO:0018022;GO:0018027;GO:0018193;GO:0018205;GO:0019219;GO:…	GO:0000166;GO:0003676;GO:0003723;GO:0003824;GO:0005488;GO:0008168;GO:0008170;GO:0008276;GO:0008757;GO:0016278;GO:0016279;GO:0016740;GO:0016741;GO:0018024;GO:0042054;GO:0042800	GO:0005694;GO:0005737;GO:0016585;GO:0032991;GO:0034708;GO:0035097;GO:0043226;GO:0043228;GO:0043229;GO:0043232;GO:0043234;GO:0044422;GO:0044424;GO:0044428;GO:0044446;GO:0044451;GO:0044464;GO:0048188	GO:0000003;GO:0006139;GO:0006259;GO:0006464;GO:0006730;GO:0006807;GO:0006950;GO:0006996;GO:0008152;GO:0008213;GO:0009987;GO:0016043;GO:0016458;GO:0018193;GO:0019538;GO:0030154;GO:0030437;GO:0031399;GO:0032200;GO:0032502;GO:0033043;GO:0034641;GO:0040029;GO:0042592;GO:0043170;GO:0043412;GO:0043934;GO:0044237;GO:0044238;GO:0044281;GO:0048468;GO:0048646;GO:0048856;GO:0050896;GO:0051276;GO:0065007	GO:0005694;GO:0005737;GO:0016585;GO:0032991;GO:0035097;GO:0043226;GO:0043229;GO:0043232;GO:0043234;GO:0044464	CADANIAG00003254	CADANIAP00003254	CADANIAT00003254			set1	IPR024657;IPR017111;IPR012677;IPR003616;IPR000504;IPR024636;IPR001214	COMPASS_Set1_N-SET;Hist_H3-K4_MeTrfase_1_fun;Nucleotide-bd_a/b_plait;Post-SET_dom;RRM_dom;SET_assoc;SET_dom	ko00310				PF11764;PF00076;PF00856;PF11767			PS50868;PS51572;PS50280	POST_SET;SAM_MT43_1;SET	Histone-lysine N-methyltransferase, H3 lysine-4 specific			SM00508;SM00360;SM00317	PostSET;RRM;SET	Emericella nidulans (strain FGSC A4 / ATCC 38163 / CBS 112.46 / NRRL 194 / M139)	SET1_EMENI		2.1.1.43	COG2940
C8VJ35;Q5B935	+			nucleus;mitochondrial matrix;membrane-enclosed lumen;organelle;membrane-bounded organelle;intracellular organelle;intracellular membrane-bounded organelle;organelle lumen;organelle part;intracellular part;mitochondrial part;cytoplasmic part;intracellular organelle part;cell part;intracellular organelle lumen		nucleus;organelle;intracellular organelle;intracellular membrane-bounded organelle;cell part		Met_10		Completeproteome;Cytoplasm;Methyltransferase;Mitochondrion;Nucleus;Referenceproteome;S-adenosyl-L-methionine;Transferase;tRNAprocessing				GO:0005634;GO:0005759;GO:0031974;GO:0043226;GO:0043227;GO:0043229;GO:0043231;GO:0043233;GO:0044422;GO:0044424;GO:0044429;GO:0044444;GO:0044446;GO:0044464;GO:0070013		GO:0005634;GO:0043226;GO:0043229;GO:0043231;GO:0044464	CADANIAG00010141	CADANIAP00010141	CADANIAT00010141			trm5	IPR030382;IPR029063;IPR025792	MeTrfase_TRM5/TYW2;SAM-dependent_MTases;tRNA_Gua_MeTrfase_euk					PF02475			PS51684	SAM_MT_TRM5_TYW2	tRNA (guanine(37)-N1)-methyltransferase					Emericella nidulans (strain FGSC A4 / ATCC 38163 / CBS 112.46 / NRRL 194 / M139)	TRM5_EMENI		2.1.1.228	NOG256497
Q5BFM4;C8VRZ7	+	one-carbon metabolic process;response to stress;response to osmotic stress;metabolic process;response to abiotic stimulus;cellular process;methylation;cellular response to stress;cellular metabolic process;small molecule metabolic process;response to stimulus;cellular response to stimulus;cellular response to abiotic stimulus;cellular response to osmotic stress	catalytic activity;methyltransferase activity;S-adenosylmethionine-dependent methyltransferase activity;transferase activity;transferase activity, transferring one-carbon groups	cytoplasm;intracellular part;cell part	one-carbon metabolic process;response to stress;response to osmotic stress;metabolic process;response to abiotic stimulus;cellular process;cellular metabolic process;small molecule metabolic process;response to stimulus	cytoplasm;cell part		Methyltransf_31		Completeproteome;Methyltransferase;Referenceproteome;Stressresponse;Transferase		GO:0006730;GO:0006950;GO:0006970;GO:0008152;GO:0009628;GO:0009987;GO:0032259;GO:0033554;GO:0044237;GO:0044281;GO:0050896;GO:0051716;GO:0071214;GO:0071470	GO:0003824;GO:0008168;GO:0008757;GO:0016740;GO:0016741	GO:0005737;GO:0044424;GO:0044464	GO:0006730;GO:0006950;GO:0006970;GO:0008152;GO:0009628;GO:0009987;GO:0044237;GO:0044281;GO:0050896	GO:0005737;GO:0044464	CADANIAG00002019	CADANIAP00002019	CADANIAT00002019			AN0656	IPR025714;IPR029063	Methyltranfer_dom;SAM-dependent_MTases					PF13847					Uncharacterized methyltransferase AN0656					Emericella nidulans (strain FGSC A4 / ATCC 38163 / CBS 112.46 / NRRL 194 / M139)	Y0656_EMENI		2.1.1.-	NOG71304
Q5B8X0;C8VIW3	+			nucleolus;cytoplasm;organelle;non-membrane-bounded organelle;intracellular organelle;intracellular non-membrane-bounded organelle;organelle part;intracellular part;nuclear part;intracellular organelle part;cell part		nucleolus;cytoplasm;organelle;intracellular organelle;intracellular non-membrane-bounded organelle;cell part		tRNA_m1G_MT		Completeproteome;Cytoplasm;Methyltransferase;Nucleus;Referenceproteome;S-adenosyl-L-methionine;Transferase;tRNAprocessing				GO:0005730;GO:0005737;GO:0043226;GO:0043228;GO:0043229;GO:0043232;GO:0044422;GO:0044424;GO:0044428;GO:0044446;GO:0044464		GO:0005730;GO:0005737;GO:0043226;GO:0043229;GO:0043232;GO:0044464	CADANIAG00010069	CADANIAP00010069	CADANIAT00010069			trm10	IPR028564;IPR007356;IPR016009	MT_TRM10-typ;tRNA_m1G_MeTrfase_euk;tRNA_MeTrfase_TRMD/TRM10					PF01746			PS51675	SAM_MT_TRM10	tRNA (guanine(9)-N1)-methyltransferase					Emericella nidulans (strain FGSC A4 / ATCC 38163 / CBS 112.46 / NRRL 194 / M139)	TRM10_EMENI		2.1.1.221	NOG254597
Q5BFG0;C8VRB9	+	protein modification process;metabolic process;biosynthetic process;cellular process;peptidyl-diphthamide metabolic process;peptidyl-diphthamide biosynthetic process from peptidyl-histidine;peptidyl-amino acid modification;peptidyl-histidine modification;protein metabolic process;macromolecule metabolic process;macromolecule modification;cellular metabolic process;primary metabolic process;cellul…	catalytic activity;diphthine synthase activity;methyltransferase activity;S-adenosylmethionine-dependent methyltransferase activity;transferase activity;transferase activity, transferring one-carbon groups	nucleus;cytosol;organelle;membrane-bounded organelle;intracellular organelle;intracellular membrane-bounded organelle;intracellular part;cytoplasmic part;cell part	protein modification process;metabolic process;biosynthetic process;cellular process;peptidyl-amino acid modification;protein metabolic process;macromolecule metabolic process;macromolecule modification;cellular metabolic process;primary metabolic process	nucleus;cytosol;organelle;intracellular organelle;intracellular membrane-bounded organelle;cell part		TP_methylase	ACEVEDO_LIVER_CANCER_UP;ACEVEDO_LIVER_TUMOR_VS_NORMAL_ADJACENT_TISSUE_UP;BLALOCK_ALZHEIMERS_DISEASE_UP;BRUINS_UVC_RESPONSE_LATE;CAIRO_HEPATOBLASTOMA_CLASSES_UP;chr1p21;COLDREN_GEFITINIB_RESISTANCE_UP;CREIGHTON_ENDOCRINE_THERAPY_RESISTANCE_1;CTTTGA_V$LEF1_Q2;DELACROIX_RARG_BOUND_MEF;DODD_NASOPHARYNGEAL_CARCINOMA_DN;FORTSCHEGGER_PHF8_TARGETS_DN;GAZDA_DIAMOND_BLACKFAN_ANEMIA_ERYTHROID_DN;GOLDRATH_EF…	Completeproteome;Cytoplasm;Methyltransferase;Referenceproteome;S-adenosyl-L-methionine;Transferase		GO:0006464;GO:0008152;GO:0009058;GO:0009987;GO:0017182;GO:0017183;GO:0018193;GO:0018202;GO:0019538;GO:0043170;GO:0043412;GO:0044237;GO:0044238;GO:0044249;GO:0044260;GO:0044267	GO:0003824;GO:0004164;GO:0008168;GO:0008757;GO:0016740;GO:0016741	GO:0005634;GO:0005829;GO:0043226;GO:0043227;GO:0043229;GO:0043231;GO:0044424;GO:0044444;GO:0044464	GO:0006464;GO:0008152;GO:0009058;GO:0009987;GO:0018193;GO:0019538;GO:0043170;GO:0043412;GO:0044237;GO:0044238	GO:0005634;GO:0005829;GO:0043226;GO:0043229;GO:0043231;GO:0044464	CADANIAG00001948	CADANIAP00001948	CADANIAT00001948			dph5	IPR000878;IPR014777;IPR014776;IPR004551	4pyrrol_Mease;4pyrrole_Mease_sub1;4pyrrole_Mease_sub2;Dphthn_synthase					PF00590					Diphthine synthase					Emericella nidulans (strain FGSC A4 / ATCC 38163 / CBS 112.46 / NRRL 194 / M139)	DPH5_EMENI		2.1.1.98	COG1798
Q5BH52;C8VQJ5	+	nucleobase-containing compound metabolic process;RNA processing;tRNA metabolic process;tRNA modification;nitrogen compound metabolic process;tRNA processing;metabolic process;guanosine metabolic process;nucleoside metabolic process;ribonucleoside metabolic process;RNA modification;cellular process;RNA metabolic process;wybutosine metabolic process;wybutosine biosynthetic process;ncRNA processing;…	catalytic activity;methyltransferase activity;RNA methyltransferase activity;tRNA methyltransferase activity;transferase activity;transferase activity, transferring one-carbon groups	nucleus;cytosol;organelle;membrane-bounded organelle;intracellular organelle;intracellular membrane-bounded organelle;intracellular part;cytoplasmic part;cell part	nucleobase-containing compound metabolic process;RNA processing;tRNA metabolic process;nitrogen compound metabolic process;tRNA processing;metabolic process;nucleoside metabolic process;RNA modification;cellular process;RNA metabolic process;cellular nitrogen compound metabolic process;macromolecule metabolic process;macromolecule modification;cellular metabolic process;primary metabolic process;…	nucleus;cytosol;organelle;intracellular organelle;intracellular membrane-bounded organelle;cell part		LCM		Completeproteome;Methyltransferase;Referenceproteome;S-adenosyl-L-methionine;Transferase;tRNAprocessing		GO:0006139;GO:0006396;GO:0006399;GO:0006400;GO:0006807;GO:0008033;GO:0008152;GO:0008617;GO:0009116;GO:0009119;GO:0009451;GO:0009987;GO:0016070;GO:0031590;GO:0031591;GO:0034470;GO:0034641;GO:0034660;GO:0042278;GO:0043170;GO:0043412;GO:0044237;GO:0044238;GO:0044260;GO:0044281;GO:0046128;GO:0046483;GO:0055086;GO:0072521;GO:0090304	GO:0003824;GO:0008168;GO:0008173;GO:0008175;GO:0016740;GO:0016741	GO:0005634;GO:0005829;GO:0043226;GO:0043227;GO:0043229;GO:0043231;GO:0044424;GO:0044444;GO:0044464	GO:0006139;GO:0006396;GO:0006399;GO:0006807;GO:0008033;GO:0008152;GO:0009116;GO:0009451;GO:0009987;GO:0016070;GO:0034641;GO:0043170;GO:0043412;GO:0044237;GO:0044238;GO:0044281;GO:0046483;GO:0055086	GO:0005634;GO:0005829;GO:0043226;GO:0043229;GO:0043231;GO:0044464	CADANIAG00002618	CADANIAP00002618	CADANIAT00002618			ppm2	IPR003347;IPR015915;IPR007213;IPR029063	JmjC_dom;Kelch-typ_b-propeller;LCM_MeTrfase;SAM-dependent_MTases					PF04072			PS51184	JMJC	tRNA wybutosine-synthesizing protein 4			SM00558	JmjC	Emericella nidulans (strain FGSC A4 / ATCC 38163 / CBS 112.46 / NRRL 194 / M139)	TYW4_EMENI		2.1.1.290;2.3.1.231	NOG329644
Q5B058;C8V2T0	+		catalytic activity;methyltransferase activity;N-methyltransferase activity;protein methyltransferase activity;S-adenosylmethionine-dependent methyltransferase activity;arginine N-methyltransferase activity;protein-arginine N-methyltransferase activity;transferase activity;transferase activity, transferring one-carbon groups;protein-arginine N5-methyltransferase activity	nucleus;cytosol;organelle;membrane-bounded organelle;intracellular organelle;intracellular membrane-bounded organelle;intracellular part;cytoplasmic part;cell part		nucleus;cytosol;organelle;intracellular organelle;intracellular membrane-bounded organelle;cell part	Histidine metabolism;Tyrosine metabolism;Polycyclic aromatic hydrocarbon degradation			Completeproteome;Cytoplasm;Methyltransferase;Nucleus;Referenceproteome;S-adenosyl-L-methionine;Transferase			GO:0003824;GO:0008168;GO:0008170;GO:0008276;GO:0008757;GO:0016273;GO:0016274;GO:0016740;GO:0016741;GO:0019702	GO:0005634;GO:0005829;GO:0043226;GO:0043227;GO:0043229;GO:0043231;GO:0044424;GO:0044444;GO:0044464		GO:0005634;GO:0005829;GO:0043226;GO:0043229;GO:0043231;GO:0044464	CADANIAG00006945	CADANIAP00006945	CADANIAT00006945			rmt2	IPR020683;IPR017408;IPR026480;IPR029063	Ankyrin_rpt-contain_dom;Arginine_N-MeTrfase_2;RMT2_dom;SAM-dependent_MTases	ko00340;ko00350;ko00624							PS51559	SAM_RMT2	Protein arginine N-methyltransferase 2					Emericella nidulans (strain FGSC A4 / ATCC 38163 / CBS 112.46 / NRRL 194 / M139)	RMT2_EMENI		2.1.1.-	NOG235457
Q5AUX6;C8V4K4	+	one-carbon metabolic process;metabolic process;cellular process;methylation;cellular metabolic process;small molecule metabolic process	catalytic activity;methyltransferase activity;S-adenosylmethionine-dependent methyltransferase activity;transferase activity;transferase activity, transferring one-carbon groups	cytoplasm;intracellular part;cell part	one-carbon metabolic process;metabolic process;cellular process;cellular metabolic process;small molecule metabolic process	cytoplasm;cell part		Methyltransf_11		Completeproteome;Referenceproteome		GO:0006730;GO:0008152;GO:0009987;GO:0032259;GO:0044237;GO:0044281	GO:0003824;GO:0008168;GO:0008757;GO:0016740;GO:0016741	GO:0005737;GO:0044424;GO:0044464	GO:0006730;GO:0008152;GO:0009987;GO:0044237;GO:0044281	GO:0005737;GO:0044464	CADANIAG00003923	CADANIAP00003923	CADANIAT00003923				IPR013216;IPR029063	Methyltransf_11;SAM-dependent_MTases					PF08241										Emericella nidulans (strain FGSC A4 / ATCC 38163 / CBS 112.46 / NRRL 194 / M139)	Q5AUX6_EMENI			NOG282864
Q5B2E5;C8VGZ9	+		catalytic activity;methyltransferase activity;O-methyltransferase activity;transferase activity;transferase activity, transferring one-carbon groups					Methyltransf_2		Completeproteome;Referenceproteome;S-adenosyl-L-methionine			GO:0003824;GO:0008168;GO:0008171;GO:0016740;GO:0016741				CADANIAG00003818	CADANIAP00003818	CADANIAT00003818				IPR016461;IPR001077;IPR029063	O-MeTrfase_COMT;O_MeTrfase_2;SAM-dependent_MTases					PF00891			PS51683	SAM_OMT_II						Emericella nidulans (strain FGSC A4 / ATCC 38163 / CBS 112.46 / NRRL 194 / M139)	Q5B2E5_EMENI			NOG116168
C8V494	+	chromatin organization;regulation of transcription, DNA-dependent;regulation of transcription from RNA polymerase II promoter;RNA export from nucleus;mRNA export from nucleus;protein modification process;protein methylation;one-carbon metabolic process;transport;nucleocytoplasmic transport;organelle organization;metabolic process;protein alkylation;regulation of biosynthetic process;negative regu…	catalytic activity;methyltransferase activity;N-methyltransferase activity;protein methyltransferase activity;histone-arginine N-methyltransferase activity;S-adenosylmethionine-dependent methyltransferase activity;arginine N-methyltransferase activity;protein-arginine N-methyltransferase activity;transferase activity;transferase activity, transferring one-carbon groups;protein-arginine omega-N mo…	nucleus;cytosol;organelle;membrane-bounded organelle;intracellular organelle;intracellular membrane-bounded organelle;intracellular part;cytoplasmic part;cell part	chromatin organization;protein modification process;one-carbon metabolic process;transport;nucleocytoplasmic transport;organelle organization;metabolic process;protein alkylation;cellular process;nucleobase-containing compound transport;cellular component organization;chromatin modification;histone modification;peptidyl-amino acid modification;protein metabolic process;macromolecule metabolic pro…	nucleus;cytosol;organelle;intracellular organelle;intracellular membrane-bounded organelle;cell part		Methyltransf_31		Completeproteome;Methyltransferase;Referenceproteome;S-adenosyl-L-methionine;Transferase		GO:0006325;GO:0006355;GO:0006357;GO:0006405;GO:0006406;GO:0006464;GO:0006479;GO:0006730;GO:0006810;GO:0006913;GO:0006996;GO:0008152;GO:0008213;GO:0009889;GO:0009890;GO:0009891;GO:0009892;GO:0009893;GO:0009987;GO:0010468;GO:0010556;GO:0010558;GO:0010604;GO:0010605;GO:0010629;GO:0015931;GO:0016043;GO:0016568;GO:0016569;GO:0016570;GO:0016571;GO:0018193;GO:0018195;GO:0018216;GO:0019219;GO:0019222;GO:…	GO:0003824;GO:0008168;GO:0008170;GO:0008276;GO:0008469;GO:0008757;GO:0016273;GO:0016274;GO:0016740;GO:0016741;GO:0035241;GO:0035242;GO:0042054;GO:0044020	GO:0005634;GO:0005829;GO:0043226;GO:0043227;GO:0043229;GO:0043231;GO:0044424;GO:0044444;GO:0044464	GO:0006325;GO:0006464;GO:0006730;GO:0006810;GO:0006913;GO:0006996;GO:0008152;GO:0008213;GO:0009987;GO:0015931;GO:0016043;GO:0016568;GO:0016570;GO:0018193;GO:0019538;GO:0043170;GO:0043412;GO:0044237;GO:0044238;GO:0044281;GO:0051169;GO:0051234;GO:0051276;GO:0065007	GO:0005634;GO:0005829;GO:0043226;GO:0043229;GO:0043231;GO:0044464	CADANIAG00004424	CADANIAP00004424	CADANIAT00004424			ANIA_10526	IPR025799;IPR025714;IPR029063	Arg_MeTrfase;Methyltranfer_dom;SAM-dependent_MTases					PF13847			PS51678	SAM_MT_PRMT						Emericella nidulans (strain FGSC A4 / ATCC 38163 / CBS 112.46 / NRRL 194 / M139)	C8V494_EMENI
C8VE82	+									Completeproteome;Referenceproteome							CADANIAG00002855	CADANIAP00002855	CADANIAT00002855			ANIA_08384	IPR029063	SAM-dependent_MTases															Emericella nidulans (strain FGSC A4 / ATCC 38163 / CBS 112.46 / NRRL 194 / M139)	C8VE82_EMENI
Q5AZ49;C8V0F6	+		catalytic activity;binding;zinc ion binding;oxidoreductase activity;transferase activity;ion binding;cation binding;metal ion binding;transition metal ion binding					Acyl_transf_1;ADH_zinc_N;ketoacyl-synt;Ketoacyl-synt_C;KR;Methyltransf_12;PS-DH		Completeproteome;Phosphoprotein;Referenceproteome			GO:0003824;GO:0005488;GO:0008270;GO:0016491;GO:0016740;GO:0043167;GO:0043169;GO:0046872;GO:0046914				CADANIAG00006547	CADANIAP00006547	CADANIAT00006547				IPR001227;IPR014043;IPR016035;IPR013149;IPR011032;IPR014031;IPR014030;IPR016036;IPR013217;IPR016040;IPR020801;IPR020807;IPR020843;IPR013968;IPR029063;IPR016039;IPR016038	Ac_transferase_dom;Acyl_transferase;Acyl_Trfase/lysoPLipase;ADH_C;GroES-like;Ketoacyl_synth_C;Ketoacyl_synth_N;Malonyl_transacylase_ACP-bd;Methyltransf_12;NAD(P)-bd_dom;PKS_acyl_transferase;PKS_dehydratase;PKS_ER;PKS_KR;SAM-dependent_MTases;Thiolase-like;Thiolase-like_subgr					PF00698;PF00107;PF00109;PF02801;PF08659;PF08242;PF14765								SM00827;SM00826;SM00829;SM00822	PKS_AT;PKS_DH;PKS_ER;PKS_KR	Emericella nidulans (strain FGSC A4 / ATCC 38163 / CBS 112.46 / NRRL 194 / M139)	Q5AZ49_EMENI			COG0604
Q5B4S7;C8V8I7	+	protein modification process;protein acetylation;N-terminal protein amino acid acetylation;metabolic process;cellular process;N-terminal peptidyl-methionine acetylation;peptidyl-amino acid modification;peptidyl-methionine modification;protein metabolic process;N-terminal protein amino acid modification;macromolecule metabolic process;macromolecule modification;protein acylation;cellular metabolic…	catalytic activity;methyltransferase activity;protein methyltransferase activity;transferase activity;transferase activity, transferring one-carbon groups;N-terminal protein N-methyltransferase activity	cytosol;intracellular part;cytoplasmic part;cell part	protein modification process;metabolic process;cellular process;peptidyl-amino acid modification;protein metabolic process;macromolecule metabolic process;macromolecule modification;protein acylation;cellular metabolic process;primary metabolic process	cytosol;cell part		NatB_MDM20		Completeproteome;Referenceproteome		GO:0006464;GO:0006473;GO:0006474;GO:0008152;GO:0009987;GO:0017196;GO:0018193;GO:0018206;GO:0019538;GO:0031365;GO:0043170;GO:0043412;GO:0043543;GO:0044237;GO:0044238;GO:0044260;GO:0044267	GO:0003824;GO:0008168;GO:0008276;GO:0016740;GO:0016741;GO:0071885	GO:0005829;GO:0044424;GO:0044444;GO:0044464	GO:0006464;GO:0008152;GO:0009987;GO:0018193;GO:0019538;GO:0043170;GO:0043412;GO:0043543;GO:0044237;GO:0044238	GO:0005829;GO:0044464	CADANIAG00005998	CADANIAP00005998	CADANIAT00005998				IPR019183	N-acetylTrfase_B_cplx_non-cat					PF09797										Emericella nidulans (strain FGSC A4 / ATCC 38163 / CBS 112.46 / NRRL 194 / M139)	Q5B4S7_EMENI			NOG259643
Q5B634;C8V5U8	+	one-carbon metabolic process;metabolic process;cellular process;methylation;cellular metabolic process;small molecule metabolic process	catalytic activity;methyltransferase activity;S-adenosylmethionine-dependent methyltransferase activity;transferase activity;transferase activity, transferring one-carbon groups	cytoplasm;intracellular part;cell part	one-carbon metabolic process;metabolic process;cellular process;cellular metabolic process;small molecule metabolic process	cytoplasm;cell part		Methyltransf_11		Completeproteome;Referenceproteome		GO:0006730;GO:0008152;GO:0009987;GO:0032259;GO:0044237;GO:0044281	GO:0003824;GO:0008168;GO:0008757;GO:0016740;GO:0016741	GO:0005737;GO:0044424;GO:0044464	GO:0006730;GO:0008152;GO:0009987;GO:0044237;GO:0044281	GO:0005737;GO:0044464	CADANIAG00004691	CADANIAP00004691	CADANIAT00004691				IPR013216;IPR029063	Methyltransf_11;SAM-dependent_MTases					PF08241										Emericella nidulans (strain FGSC A4 / ATCC 38163 / CBS 112.46 / NRRL 194 / M139)	Q5B634_EMENI			NOG282864
Q5B1F0;C8VFW8	+		catalytic activity;methyltransferase activity;N-methyltransferase activity;protein methyltransferase activity;S-adenosylmethionine-dependent methyltransferase activity;lysine N-methyltransferase activity;protein-lysine N-methyltransferase activity;transferase activity;transferase activity, transferring one-carbon groups	nucleus;cytosol;organelle;membrane-bounded organelle;intracellular organelle;intracellular membrane-bounded organelle;intracellular part;cytoplasmic part;cell part		nucleus;cytosol;organelle;intracellular organelle;intracellular membrane-bounded organelle;cell part				Completeproteome;Referenceproteome			GO:0003824;GO:0008168;GO:0008170;GO:0008276;GO:0008757;GO:0016278;GO:0016279;GO:0016740;GO:0016741	GO:0005634;GO:0005829;GO:0043226;GO:0043227;GO:0043229;GO:0043231;GO:0044424;GO:0044444;GO:0044464		GO:0005634;GO:0005829;GO:0043226;GO:0043229;GO:0043231;GO:0044464	CADANIAG00003440	CADANIAP00003440	CADANIAT00003440																				Emericella nidulans (strain FGSC A4 / ATCC 38163 / CBS 112.46 / NRRL 194 / M139)	Q5B1F0_EMENI			NOG265033
Q5AU65;C8V6X8	+							Methyltransf_32		Completeproteome;Referenceproteome							CADANIAG00004205	CADANIAP00004205	CADANIAT00004205				IPR025714	Methyltranfer_dom					PF13679										Emericella nidulans (strain FGSC A4 / ATCC 38163 / CBS 112.46 / NRRL 194 / M139)	Q5AU65_EMENI			NOG313369
C8VT24	+	negative regulation of transcription from RNA polymerase II promoter;chromatin silencing at rDNA;microtubule cytoskeleton organization;developmental process involved in reproduction;chromatin organization;chromatin silencing;chromatin silencing at telomere;regulation of transcription, DNA-dependent;regulation of transcription from RNA polymerase II promoter;protein modification process;protein ac…	nucleic acid binding;DNA binding;double-stranded DNA binding;single-stranded DNA binding;RNA binding;single-stranded RNA binding;catalytic activity;binding;methyltransferase activity;N-methyltransferase activity;zinc ion binding;protein methyltransferase activity;S-adenosylmethionine-dependent methyltransferase activity;lysine N-methyltransferase activity;protein-lysine N-methyltransferase activi…	ubiquitin ligase complex;chromosome;cullin-RING ubiquitin ligase complex;Cul4B-RING ubiquitin ligase complex;macromolecular complex;organelle;non-membrane-bounded organelle;intracellular organelle;intracellular non-membrane-bounded organelle;protein complex;CLRC ubiquitin ligase complex;intracellular part;cell part;CUL4 RING ubiquitin ligase complex	chromatin organization;protein modification process;one-carbon metabolic process;organelle organization;cytoskeleton organization;metabolic process;protein alkylation;cellular process;cellular component organization;gene silencing;chromatin modification;histone modification;peptidyl-amino acid modification;protein metabolic process;developmental process;regulation of gene expression, epigenetic;m…	ubiquitin ligase complex;chromosome;macromolecular complex;organelle;intracellular organelle;intracellular non-membrane-bounded organelle;protein complex;cell part		Pre-SET;SET		Chromosome;Completeproteome;Methyltransferase;Nucleus;Referenceproteome;S-adenosyl-L-methionine;Transferase		GO:0000122;GO:0000183;GO:0000226;GO:0003006;GO:0006325;GO:0006342;GO:0006348;GO:0006355;GO:0006357;GO:0006464;GO:0006473;GO:0006475;GO:0006479;GO:0006730;GO:0006996;GO:0007010;GO:0007017;GO:0007535;GO:0008152;GO:0008213;GO:0008608;GO:0009889;GO:0009890;GO:0009892;GO:0009987;GO:0010468;GO:0010556;GO:0010558;GO:0010605;GO:0010629;GO:0016043;GO:0016458;GO:0016568;GO:0016569;GO:0016570;GO:0016571;GO:…	GO:0003676;GO:0003677;GO:0003690;GO:0003697;GO:0003723;GO:0003727;GO:0003824;GO:0005488;GO:0008168;GO:0008170;GO:0008270;GO:0008276;GO:0008757;GO:0016278;GO:0016279;GO:0016740;GO:0016741;GO:0018024;GO:0042054;GO:0043167;GO:0043169;GO:0043566;GO:0046872;GO:0046914;GO:0046974	GO:0000151;GO:0005694;GO:0031461;GO:0031465;GO:0032991;GO:0043226;GO:0043228;GO:0043229;GO:0043232;GO:0043234;GO:0043494;GO:0044424;GO:0044464;GO:0080008	GO:0006325;GO:0006464;GO:0006730;GO:0006996;GO:0007010;GO:0008152;GO:0008213;GO:0009987;GO:0016043;GO:0016458;GO:0016568;GO:0016570;GO:0018193;GO:0019538;GO:0032502;GO:0040029;GO:0043170;GO:0043412;GO:0043543;GO:0044237;GO:0044238;GO:0044281;GO:0051179;GO:0051276;GO:0051641;GO:0065007	GO:0000151;GO:0005694;GO:0032991;GO:0043226;GO:0043229;GO:0043232;GO:0043234;GO:0044464	CADANIAG00001456	CADANIAP00001456	CADANIAT00001456			ANIA_01170	IPR003616;IPR007728;IPR001214	Post-SET_dom;Pre-SET_dom;SET_dom					PF05033;PF00856			PS50868;PS50867;PS50280	POST_SET;PRE_SET;SET	Histone-lysine N-methyltransferase			SM00508;SM00317	PostSET;SET	Emericella nidulans (strain FGSC A4 / ATCC 38163 / CBS 112.46 / NRRL 194 / M139)	C8VT24_EMENI		2.1.1.43
Q5BBH6	+		nucleic acid binding;catalytic activity;binding;methyltransferase activity;transferase activity;transferase activity, transferring one-carbon groups										GO:0003676;GO:0003824;GO:0005488;GO:0008168;GO:0016740;GO:0016741									AN2104.2	IPR002052;IPR029063	DNA_methylase_N6_adenine_CS;SAM-dependent_MTases								PS00092	N6_MTASE						Emericella nidulans (strain FGSC A4 / ATCC 38163 / CBS 112.46 / NRRL 194 / M139)	Q5BBH6_EMENI			COG2890
Q5BH35	+	melanin metabolic process;metabolic process;secondary metabolic process;pigment metabolic process	catalytic activity;acid phosphatase activity;hydrolase activity;hydrolase activity, acting on ester bonds;phosphatase activity;lyase activity;carbon-oxygen lyase activity;hydro-lyase activity;scytalone dehydratase activity;phosphoric ester hydrolase activity		metabolic process;secondary metabolic process;pigment metabolic process			His_Phos_2;Scytalone_dh				GO:0006582;GO:0008152;GO:0019748;GO:0042440	GO:0003824;GO:0003993;GO:0016787;GO:0016788;GO:0016791;GO:0016829;GO:0016835;GO:0016836;GO:0030411;GO:0042578		GO:0008152;GO:0019748;GO:0042440							AN0145.2	IPR000560;IPR029033;IPR029063;IPR004235;IPR011991	His_Pase_superF_clade-2;His_PPase_superfam;SAM-dependent_MTases;Scytalone_dehydratase;WHTH_DNA-bd_dom					PF00328;PF02982										Emericella nidulans (strain FGSC A4 / ATCC 38163 / CBS 112.46 / NRRL 194 / M139)	Q5BH35_EMENI			NOG128411
Q5B4T7	+	sulfur amino acid metabolic process;sulfur amino acid biosynthetic process;organic acid metabolic process;cellular amino acid metabolic process;methionine metabolic process;sulfur compound metabolic process;nitrogen compound metabolic process;metabolic process;cellular amino acid biosynthetic process;biosynthetic process;aspartate family amino acid metabolic process;aspartate family amino acid bi…	catalytic activity;5-methyltetrahydropteroyltriglutamate-homocysteine S-methyltransferase activity;binding;methyltransferase activity;S-methyltransferase activity;zinc ion binding;transferase activity;transferase activity, transferring one-carbon groups;5-methyltetrahydropteroyltri-L-glutamate-dependent methyltransferase activity;ion binding;cation binding;metal ion binding;transition metal ion b…		organic acid metabolic process;cellular amino acid metabolic process;sulfur compound metabolic process;nitrogen compound metabolic process;metabolic process;biosynthetic process;amine metabolic process;cellular process;cellular nitrogen compound metabolic process;cellular ketone metabolic process;cellular metabolic process;primary metabolic process;small molecule metabolic process		Cysteine and methionine metabolism;Selenocompound metabolism	Meth_synt_1;Meth_synt_2				GO:0000096;GO:0000097;GO:0006082;GO:0006520;GO:0006555;GO:0006790;GO:0006807;GO:0008152;GO:0008652;GO:0009058;GO:0009066;GO:0009067;GO:0009086;GO:0009308;GO:0009309;GO:0009987;GO:0016053;GO:0019752;GO:0034641;GO:0042180;GO:0043436;GO:0044106;GO:0044237;GO:0044238;GO:0044249;GO:0044271;GO:0044272;GO:0044281;GO:0044283;GO:0046394	GO:0003824;GO:0003871;GO:0005488;GO:0008168;GO:0008172;GO:0008270;GO:0016740;GO:0016741;GO:0042085;GO:0043167;GO:0043169;GO:0046872;GO:0046914		GO:0006082;GO:0006520;GO:0006790;GO:0006807;GO:0008152;GO:0009058;GO:0009308;GO:0009987;GO:0034641;GO:0042180;GO:0044237;GO:0044238;GO:0044281							AN4443.2	IPR013215;IPR006276;IPR002629	Cbl-indep_Met_Synth_N;Cobalamin-indep_Met_synthase;Met_Synth_C/arc	ko00270;ko00450				PF08267;PF01717										Emericella nidulans (strain FGSC A4 / ATCC 38163 / CBS 112.46 / NRRL 194 / M139)	Q5B4T7_EMENI			COG0620
Q5B894	+		catalytic activity;methyltransferase activity;O-methyltransferase activity;transferase activity;transferase activity, transferring one-carbon groups										GO:0003824;GO:0008168;GO:0008171;GO:0016740;GO:0016741									AN3236.2	IPR002935;IPR029063	O-MeTrfase_3;SAM-dependent_MTases															Emericella nidulans (strain FGSC A4 / ATCC 38163 / CBS 112.46 / NRRL 194 / M139)	Q5B894_EMENI			COG4122
Q5AQM4;C8VRK9	+		nucleic acid binding;RNA binding;catalytic activity;tRNA (guanine-N2-)-methyltransferase activity;binding;methyltransferase activity;N-methyltransferase activity;RNA methyltransferase activity;tRNA methyltransferase activity;S-adenosylmethionine-dependent methyltransferase activity;tRNA (guanine) methyltransferase activity;transferase activity;transferase activity, transferring one-carbon groups	nucleus;nuclear inner membrane;mitochondrion;membrane;organelle inner membrane;organelle membrane;nuclear membrane;organelle;membrane-bounded organelle;intracellular organelle;intracellular membrane-bounded organelle;organelle part;intracellular part;nuclear part;cytoplasmic part;intracellular organelle part;cell part		nucleus;mitochondrion;membrane;organelle;intracellular organelle;intracellular membrane-bounded organelle;cell part		TRM		Completeproteome;Referenceproteome			GO:0003676;GO:0003723;GO:0003824;GO:0004809;GO:0005488;GO:0008168;GO:0008170;GO:0008173;GO:0008175;GO:0008757;GO:0016423;GO:0016740;GO:0016741	GO:0005634;GO:0005637;GO:0005739;GO:0016020;GO:0019866;GO:0031090;GO:0031965;GO:0043226;GO:0043227;GO:0043229;GO:0043231;GO:0044422;GO:0044424;GO:0044428;GO:0044444;GO:0044446;GO:0044464		GO:0005634;GO:0005739;GO:0016020;GO:0043226;GO:0043229;GO:0043231;GO:0044464	CADANIAG00001193	CADANIAP00001193	CADANIAT00001193				IPR029063;IPR002905	SAM-dependent_MTases;Trm1					PF02005			PS51626	SAM_MT_TRM1						Emericella nidulans (strain FGSC A4 / ATCC 38163 / CBS 112.46 / NRRL 194 / M139)	Q5AQM4_EMENI			COG1867
Q5AS20;C8VLK6	+	metabolic process;secondary metabolic process	catalytic activity;binding;zinc ion binding;oxidoreductase activity;transferase activity;ion binding;cation binding;metal ion binding;transition metal ion binding		metabolic process;secondary metabolic process			Acyl_transf_1;ADH_N;ADH_zinc_N;ketoacyl-synt;Ketoacyl-synt_C;KR;Methyltransf_12;PP-binding;PS-DH		Completeproteome;Phosphopantetheine;Referenceproteome		GO:0008152;GO:0019748	GO:0003824;GO:0005488;GO:0008270;GO:0016491;GO:0016740;GO:0043167;GO:0043169;GO:0046872;GO:0046914		GO:0008152;GO:0019748		CADANIAG00007957	CADANIAP00007957	CADANIAT00007957				IPR001227;IPR009081;IPR014043;IPR016035;IPR013149;IPR013154;IPR011032;IPR014031;IPR014030;IPR016036;IPR013217;IPR016040;IPR020801;IPR020807;IPR020843;IPR013968;IPR006162;IPR029063;IPR016039;IPR016038	Ac_transferase_dom;Acyl_carrier_prot-like;Acyl_transferase;Acyl_Trfase/lysoPLipase;ADH_C;ADH_GroES-like;GroES-like;Ketoacyl_synth_C;Ketoacyl_synth_N;Malonyl_transacylase_ACP-bd;Methyltransf_12;NAD(P)-bd_dom;PKS_acyl_transferase;PKS_dehydratase;PKS_ER;PKS_KR;Ppantetheine_attach_site;SAM-dependent_MTases;Thiolase-like;Thiolase-like_subgr					PF00698;PF08240;PF00107;PF00109;PF02801;PF08659;PF08242;PF00550;PF14765			PS50075;PS00012	ACP_DOMAIN;PHOSPHOPANTETHEINE				SM00827;SM00826;SM00829;SM00822	PKS_AT;PKS_DH;PKS_ER;PKS_KR	Emericella nidulans (strain FGSC A4 / ATCC 38163 / CBS 112.46 / NRRL 194 / M139)	Q5AS20_EMENI			COG3321
Q5BD14	+																					AN1566.2	IPR029063	SAM-dependent_MTases															Emericella nidulans (strain FGSC A4 / ATCC 38163 / CBS 112.46 / NRRL 194 / M139)	Q5BD14_EMENI			COG0500
Q5B8S2	+	organic acid metabolic process;cellular amino acid metabolic process;glycine metabolic process;L-serine metabolic process;cellular aromatic compound metabolic process;one-carbon metabolic process;coenzyme metabolic process;folic acid-containing compound metabolic process;nitrogen compound metabolic process;metabolic process;serine family amino acid metabolic process;amine metabolic process;cellul…	catalytic activity;glycine hydroxymethyltransferase activity;binding;transferase activity;transferase activity, transferring one-carbon groups;hydroxymethyl-, formyl- and related transferase activity;vitamin binding;pyridoxal phosphate binding;cofactor binding;vitamin B6 binding		organic acid metabolic process;cellular amino acid metabolic process;cellular aromatic compound metabolic process;one-carbon metabolic process;nitrogen compound metabolic process;metabolic process;amine metabolic process;cellular process;cellular nitrogen compound metabolic process;cellular ketone metabolic process;cellular metabolic process;primary metabolic process;small molecule metabolic proc…		Glycine, serine and threonine metabolism;Cyanoamino acid metabolism;One carbon pool by folate;Methane metabolism	SHMT		One-carbonmetabolism;Pyridoxalphosphate;Transferase		GO:0006082;GO:0006520;GO:0006544;GO:0006563;GO:0006725;GO:0006730;GO:0006732;GO:0006760;GO:0006807;GO:0008152;GO:0009069;GO:0009308;GO:0009987;GO:0019752;GO:0034641;GO:0035999;GO:0042180;GO:0042558;GO:0043436;GO:0044106;GO:0044237;GO:0044238;GO:0044281;GO:0046483;GO:0046653;GO:0051186	GO:0003824;GO:0004372;GO:0005488;GO:0016740;GO:0016741;GO:0016742;GO:0019842;GO:0030170;GO:0048037;GO:0070279		GO:0006082;GO:0006520;GO:0006725;GO:0006730;GO:0006807;GO:0008152;GO:0009308;GO:0009987;GO:0034641;GO:0042180;GO:0044237;GO:0044238;GO:0044281;GO:0046483;GO:0051186							AN3058.2	IPR015424;IPR015421;IPR015422;IPR001085;IPR019798	PyrdxlP-dep_Trfase;PyrdxlP-dep_Trfase_major_sub1;PyrdxlP-dep_Trfase_major_sub2;Ser_HO-MeTrfase;Ser_HO-MeTrfase_PLP_BS	ko00260;ko00460;ko00670;ko00680				PF00464			PS00096	SHMT	Serine hydroxymethyltransferase					Emericella nidulans (strain FGSC A4 / ATCC 38163 / CBS 112.46 / NRRL 194 / M139)	Q5B8S2_EMENI		2.1.2.1	COG0112
C8VAI0	+							Methyltransf_33		Completeproteome;Referenceproteome							CADANIAG00006458	CADANIAP00006458	CADANIAT00006458			ANIA_11095	IPR019257;IPR017804;IPR017805	MeTrfase_dom;MeTrfase_EgtD-like;SAM_MeTrfase_EsaF-type_put					PF10017										Emericella nidulans (strain FGSC A4 / ATCC 38163 / CBS 112.46 / NRRL 194 / M139)	C8VAI0_EMENI
C8VMP4	+							Methyltransf_28		Completeproteome;Referenceproteome							CADANIAG00008138	CADANIAP00008138	CADANIAT00008138			ANIA_10212	IPR003788;IPR029063	MidA;SAM-dependent_MTases					PF02636										Emericella nidulans (strain FGSC A4 / ATCC 38163 / CBS 112.46 / NRRL 194 / M139)	C8VMP4_EMENI
Q5B777;C8V476	+		catalytic activity;methyltransferase activity;RNA methyltransferase activity;tRNA methyltransferase activity;S-adenosylmethionine-dependent methyltransferase activity;tRNA (adenine) methyltransferase activity;tRNA (adenine-N1-)-methyltransferase activity;transferase activity;transferase activity, transferring one-carbon groups	tRNA (m1A) methyltransferase complex;macromolecular complex;methyltransferase complex;protein complex;tRNA methyltransferase complex;intracellular part;cytoplasmic part;cell part		macromolecular complex;protein complex;tRNA methyltransferase complex;cell part				Completeproteome;Referenceproteome			GO:0003824;GO:0008168;GO:0008173;GO:0008175;GO:0008757;GO:0016426;GO:0016429;GO:0016740;GO:0016741	GO:0031515;GO:0032991;GO:0034708;GO:0043234;GO:0043527;GO:0044424;GO:0044444;GO:0044464		GO:0032991;GO:0043234;GO:0043527;GO:0044464	CADANIAG00005141	CADANIAP00005141	CADANIAT00005141				IPR029063;IPR014816	SAM-dependent_MTases;tRNA_MeTrfase_Gcd14								PS51620	SAM_TRM61						Emericella nidulans (strain FGSC A4 / ATCC 38163 / CBS 112.46 / NRRL 194 / M139)	Q5B777_EMENI			NOG75487
Q5AT11;C8VEU0	+		catalytic activity;methyltransferase activity;O-methyltransferase activity;transferase activity;transferase activity, transferring one-carbon groups					Methyltransf_2		Completeproteome;Referenceproteome;S-adenosyl-L-methionine			GO:0003824;GO:0008168;GO:0008171;GO:0016740;GO:0016741				CADANIAG00003063	CADANIAP00003063	CADANIAT00003063				IPR016461;IPR001077;IPR029063	O-MeTrfase_COMT;O_MeTrfase_2;SAM-dependent_MTases					PF00891			PS51683	SAM_OMT_II						Emericella nidulans (strain FGSC A4 / ATCC 38163 / CBS 112.46 / NRRL 194 / M139)	Q5AT11_EMENI			NOG328931
Q5B054;C8V2S6	+		nucleotide binding;nucleic acid binding;DNA binding;binding;ATP binding;purine nucleotide binding;adenyl nucleotide binding;ribonucleotide binding;purine ribonucleotide binding;adenyl ribonucleotide binding;purine ribonucleoside triphosphate binding					SNF2_N		Completeproteome;Referenceproteome			GO:0000166;GO:0003676;GO:0003677;GO:0005488;GO:0005524;GO:0017076;GO:0030554;GO:0032553;GO:0032555;GO:0032559;GO:0035639				CADANIAG00006941	CADANIAP00006941	CADANIAT00006941				IPR014001;IPR027417;IPR029063;IPR000330	Helicase_ATP-bd;P-loop_NTPase;SAM-dependent_MTases;SNF2_N					PF00176								SM00487	DEXDc	Emericella nidulans (strain FGSC A4 / ATCC 38163 / CBS 112.46 / NRRL 194 / M139)	Q5B054_EMENI			NOG288965
Q5AS81;C8V9I0	+	rRNA modification;RNA methylation;nucleobase-containing compound metabolic process;rRNA processing;RNA processing;one-carbon metabolic process;nitrogen compound metabolic process;metabolic process;RNA modification;cellular process;RNA metabolic process;rRNA metabolic process;rRNA methylation;methylation;ncRNA processing;cellular nitrogen compound metabolic process;ncRNA metabolic process;macromol…	catalytic activity;methyltransferase activity;N-methyltransferase activity;RNA methyltransferase activity;rRNA methyltransferase activity;S-adenosylmethionine-dependent methyltransferase activity;rRNA (uridine) methyltransferase activity;transferase activity;transferase activity, transferring one-carbon groups;rRNA (uridine-N3-)-methyltransferase activity	nucleolus;cytoplasm;organelle;non-membrane-bounded organelle;intracellular organelle;intracellular non-membrane-bounded organelle;organelle part;intracellular part;nuclear part;intracellular organelle part;cell part	nucleobase-containing compound metabolic process;rRNA processing;RNA processing;one-carbon metabolic process;nitrogen compound metabolic process;metabolic process;RNA modification;cellular process;RNA metabolic process;cellular nitrogen compound metabolic process;macromolecule metabolic process;macromolecule modification;cellular metabolic process;primary metabolic process;small molecule metaboli…	nucleolus;cytoplasm;organelle;intracellular organelle;intracellular non-membrane-bounded organelle;cell part		DUF2431		Completeproteome;Referenceproteome		GO:0000154;GO:0001510;GO:0006139;GO:0006364;GO:0006396;GO:0006730;GO:0006807;GO:0008152;GO:0009451;GO:0009987;GO:0016070;GO:0016072;GO:0031167;GO:0032259;GO:0034470;GO:0034641;GO:0034660;GO:0043170;GO:0043412;GO:0043414;GO:0044237;GO:0044238;GO:0044260;GO:0044281;GO:0070475;GO:0090304	GO:0003824;GO:0008168;GO:0008170;GO:0008173;GO:0008649;GO:0008757;GO:0016436;GO:0016740;GO:0016741;GO:0070042	GO:0005730;GO:0005737;GO:0043226;GO:0043228;GO:0043229;GO:0043232;GO:0044422;GO:0044424;GO:0044428;GO:0044446;GO:0044464	GO:0006139;GO:0006364;GO:0006396;GO:0006730;GO:0006807;GO:0008152;GO:0009451;GO:0009987;GO:0016070;GO:0034641;GO:0043170;GO:0043412;GO:0044237;GO:0044238;GO:0044281	GO:0005730;GO:0005737;GO:0043226;GO:0043229;GO:0043232;GO:0044464	CADANIAG00006204	CADANIAP00006204	CADANIAT00006204				IPR019446	DUF2431					PF10354										Emericella nidulans (strain FGSC A4 / ATCC 38163 / CBS 112.46 / NRRL 194 / M139)	Q5AS81_EMENI			NOG284598
C8VR90	+	box C/D snoRNA 3'-end processing;nucleobase-containing compound metabolic process;regulation of transcription, DNA-dependent;regulation of transcription from RNA polymerase I promoter;RNA processing;tRNA metabolic process;nitrogen compound metabolic process;tRNA processing;metabolic process;regulation of biosynthetic process;cellular process;regulation of gene expression;regulation of macromolecu…	nucleic acid binding;RNA binding;mRNA binding;catalytic activity;binding;methyltransferase activity;RNA methyltransferase activity;rRNA methyltransferase activity;S-adenosylmethionine-dependent methyltransferase activity;transferase activity;transferase activity, transferring one-carbon groups	small nucleolar ribonucleoprotein complex;spindle;ribosome;ribonucleoprotein complex;preribosome;90S preribosome;box C/D snoRNP complex;small-subunit processome;macromolecular complex;organelle;non-membrane-bounded organelle;intracellular organelle;intracellular non-membrane-bounded organelle;organelle part;intracellular part;nuclear part;cytoskeletal part;cytoplasmic part;intracellular organelle…	nucleobase-containing compound metabolic process;RNA processing;tRNA metabolic process;nitrogen compound metabolic process;tRNA processing;metabolic process;cellular process;RNA metabolic process;cellular nitrogen compound metabolic process;snoRNA processing;macromolecule metabolic process;cellular metabolic process;primary metabolic process;biological regulation	small nucleolar ribonucleoprotein complex;ribosome;ribonucleoprotein complex;preribosome;macromolecular complex;organelle;intracellular organelle;intracellular non-membrane-bounded organelle;cell part		Fibrillarin		Completeproteome;Referenceproteome		GO:0000494;GO:0006139;GO:0006355;GO:0006356;GO:0006396;GO:0006399;GO:0006807;GO:0008033;GO:0008152;GO:0009889;GO:0009987;GO:0010468;GO:0010556;GO:0016070;GO:0016074;GO:0019219;GO:0019222;GO:0031123;GO:0031126;GO:0031323;GO:0031326;GO:0033967;GO:0034470;GO:0034641;GO:0034660;GO:0034963;GO:0043144;GO:0043170;GO:0043628;GO:0044237;GO:0044238;GO:0044260;GO:0050789;GO:0050794;GO:0051171;GO:0051252;GO:…	GO:0003676;GO:0003723;GO:0003729;GO:0003824;GO:0005488;GO:0008168;GO:0008173;GO:0008649;GO:0008757;GO:0016740;GO:0016741	GO:0005732;GO:0005819;GO:0005840;GO:0030529;GO:0030684;GO:0030686;GO:0031428;GO:0032040;GO:0032991;GO:0043226;GO:0043228;GO:0043229;GO:0043232;GO:0044422;GO:0044424;GO:0044428;GO:0044430;GO:0044444;GO:0044446;GO:0044452;GO:0044464;GO:0072686	GO:0006139;GO:0006396;GO:0006399;GO:0006807;GO:0008033;GO:0008152;GO:0009987;GO:0016070;GO:0034641;GO:0043144;GO:0043170;GO:0044237;GO:0044238;GO:0065007	GO:0005732;GO:0005840;GO:0030529;GO:0030684;GO:0032991;GO:0043226;GO:0043229;GO:0043232;GO:0044464	CADANIAG00001919	CADANIAP00001919	CADANIAT00001919			ANIA_00745	IPR000692;IPR029063	Fibrillarin;SAM-dependent_MTases					PF01269	PR00052	FIBRILLARIN								Emericella nidulans (strain FGSC A4 / ATCC 38163 / CBS 112.46 / NRRL 194 / M139)	C8VR90_EMENI
C8VLB4	+			cytoplasm;intracellular part;cell part		cytoplasm;cell part				Completeproteome;Referenceproteome				GO:0005737;GO:0044424;GO:0044464		GO:0005737;GO:0044464	CADANIAG00007917	CADANIAP00007917	CADANIAT00007917			ANIA_08945	IPR029063	SAM-dependent_MTases															Emericella nidulans (strain FGSC A4 / ATCC 38163 / CBS 112.46 / NRRL 194 / M139)	C8VLB4_EMENI
C8VUH6	+	regulation of translation;regulation of translational termination;protein modification process;protein methylation;one-carbon metabolic process;metabolic process;protein alkylation;regulation of biosynthetic process;positive regulation of biosynthetic process;positive regulation of metabolic process;cellular process;regulation of gene expression;regulation of macromolecule biosynthetic process;po…	catalytic activity;methyltransferase activity;N-methyltransferase activity;protein methyltransferase activity;S-adenosylmethionine-dependent methyltransferase activity;lysine N-methyltransferase activity;protein-lysine N-methyltransferase activity;transferase activity;transferase activity, transferring one-carbon groups	nucleus;cytosol;organelle;membrane-bounded organelle;intracellular organelle;intracellular membrane-bounded organelle;intracellular part;cytoplasmic part;cell part	regulation of translation;protein modification process;one-carbon metabolic process;metabolic process;protein alkylation;cellular process;peptidyl-amino acid modification;protein metabolic process;macromolecule metabolic process;macromolecule modification;cellular metabolic process;primary metabolic process;small molecule metabolic process;biological regulation	nucleus;cytosol;organelle;intracellular organelle;intracellular membrane-bounded organelle;cell part		Methyltransf_16		Completeproteome;Referenceproteome		GO:0006417;GO:0006449;GO:0006464;GO:0006479;GO:0006730;GO:0008152;GO:0008213;GO:0009889;GO:0009891;GO:0009893;GO:0009987;GO:0010468;GO:0010556;GO:0010557;GO:0010604;GO:0010608;GO:0018022;GO:0018027;GO:0018193;GO:0018205;GO:0019222;GO:0019538;GO:0031323;GO:0031325;GO:0031326;GO:0031328;GO:0032259;GO:0032268;GO:0032270;GO:0043170;GO:0043243;GO:0043244;GO:0043412;GO:0043414;GO:0044237;GO:0044238;GO:…	GO:0003824;GO:0008168;GO:0008170;GO:0008276;GO:0008757;GO:0016278;GO:0016279;GO:0016740;GO:0016741	GO:0005634;GO:0005829;GO:0043226;GO:0043227;GO:0043229;GO:0043231;GO:0044424;GO:0044444;GO:0044464	GO:0006417;GO:0006464;GO:0006730;GO:0008152;GO:0008213;GO:0009987;GO:0018193;GO:0019538;GO:0043170;GO:0043412;GO:0044237;GO:0044238;GO:0044281;GO:0065007	GO:0005634;GO:0005829;GO:0043226;GO:0043229;GO:0043231;GO:0044464	CADANIAG00001710	CADANIAP00001710	CADANIAT00001710			ANIA_10134	IPR019410;IPR029063	Nicotinamide_N-MeTfrase-like;SAM-dependent_MTases					PF10294										Emericella nidulans (strain FGSC A4 / ATCC 38163 / CBS 112.46 / NRRL 194 / M139)	C8VUH6_EMENI
Q5BC14	+		binding;zinc ion binding;ion binding;cation binding;metal ion binding;transition metal ion binding	nucleus;organelle;membrane-bounded organelle;intracellular organelle;intracellular membrane-bounded organelle;intracellular part;cell part		nucleus;organelle;intracellular organelle;intracellular membrane-bounded organelle;cell part	mRNA surveillance pathway	Pox_MCEL;Rsm1;zf-C3HC					GO:0005488;GO:0008270;GO:0043167;GO:0043169;GO:0046872;GO:0046914	GO:0005634;GO:0043226;GO:0043227;GO:0043229;GO:0043231;GO:0044424;GO:0044464		GO:0005634;GO:0043226;GO:0043229;GO:0043231;GO:0044464						AN1916.2	IPR004971;IPR013909;IPR029063;IPR012935;IPR004181;IPR013083	mRNA_G-N7_MeTrfase_dom;NIPA/Rsm1;SAM-dependent_MTases;Znf_C3HC-like;Znf_MIZ;Znf_RING/FYVE/PHD	ko03015				PF03291;PF08600;PF07967			PS51562;PS51044	RNA_CAP0_MT;ZF_SP_RING						Emericella nidulans (strain FGSC A4 / ATCC 38163 / CBS 112.46 / NRRL 194 / M139)	Q5BC14_EMENI			COG0500
Q5B8X8;C8VIX1	+									Completeproteome;Referenceproteome							CADANIAG00010077	CADANIAP00010077	CADANIAT00010077				IPR029063	SAM-dependent_MTases															Emericella nidulans (strain FGSC A4 / ATCC 38163 / CBS 112.46 / NRRL 194 / M139)	Q5B8X8_EMENI			NOG72762
Q5BH46;C8VQI9	+	G2/M transition of mitotic cell cycle;cell morphogenesis;chromatin organization;regulation of transcription, DNA-dependent;protein modification process;protein methylation;one-carbon metabolic process;response to stress;response to osmotic stress;organelle organization;regulation of mitosis;establishment or maintenance of cell polarity;regulation of mitotic cell cycle;metabolic process;protein al…	catalytic activity;methyltransferase activity;N-methyltransferase activity;protein methyltransferase activity;histone-arginine N-methyltransferase activity;S-adenosylmethionine-dependent methyltransferase activity;arginine N-methyltransferase activity;protein-arginine N-methyltransferase activity;transferase activity;transferase activity, transferring one-carbon groups;protein-arginine omega-N mo…	cellular bud neck septin structure;nucleus;cytosol;cytoskeleton;cell division site part;septin cytoskeleton;cleavage apparatus septin structure;septin collar;cellular bud neck septin collar;macromolecular complex;organelle;membrane-bounded organelle;non-membrane-bounded organelle;intracellular organelle;intracellular membrane-bounded organelle;intracellular non-membrane-bounded organelle;protein …	cell morphogenesis;chromatin organization;protein modification process;one-carbon metabolic process;response to stress;response to osmotic stress;organelle organization;establishment or maintenance of cell polarity;regulation of mitotic cell cycle;metabolic process;protein alkylation;catabolic process;response to abiotic stimulus;anatomical structure morphogenesis;cellular process;cellular compon…	nucleus;cytosol;cytoskeleton;macromolecular complex;organelle;intracellular organelle;intracellular membrane-bounded organelle;intracellular non-membrane-bounded organelle;protein complex;cell part	RNA transport;Cell cycle - yeast	PRMT5		Completeproteome;Methyltransferase;Referenceproteome;S-adenosyl-L-methionine;Transferase		GO:0000086;GO:0000902;GO:0006325;GO:0006355;GO:0006464;GO:0006479;GO:0006730;GO:0006950;GO:0006970;GO:0006996;GO:0007088;GO:0007163;GO:0007346;GO:0008152;GO:0008213;GO:0008360;GO:0009056;GO:0009057;GO:0009628;GO:0009653;GO:0009889;GO:0009987;GO:0010468;GO:0010556;GO:0010564;GO:0010638;GO:0016043;GO:0016568;GO:0016569;GO:0016570;GO:0016571;GO:0018193;GO:0018195;GO:0018216;GO:0019219;GO:0019222;GO:…	GO:0003824;GO:0008168;GO:0008170;GO:0008276;GO:0008469;GO:0008757;GO:0016273;GO:0016274;GO:0016740;GO:0016741;GO:0035241;GO:0035243;GO:0042054	GO:0000399;GO:0005634;GO:0005829;GO:0005856;GO:0032155;GO:0032156;GO:0032161;GO:0032173;GO:0032174;GO:0032991;GO:0043226;GO:0043227;GO:0043228;GO:0043229;GO:0043231;GO:0043232;GO:0043234;GO:0044422;GO:0044424;GO:0044430;GO:0044444;GO:0044446;GO:0044448;GO:0044464;GO:0051286;GO:0060187;GO:0071521	GO:0000902;GO:0006325;GO:0006464;GO:0006730;GO:0006950;GO:0006970;GO:0006996;GO:0007163;GO:0007346;GO:0008152;GO:0008213;GO:0009056;GO:0009628;GO:0009653;GO:0009987;GO:0016043;GO:0016568;GO:0016570;GO:0018193;GO:0019538;GO:0030163;GO:0032502;GO:0032989;GO:0033043;GO:0043170;GO:0043412;GO:0044237;GO:0044238;GO:0044281;GO:0050896;GO:0051276;GO:0051726;GO:0065007	GO:0005634;GO:0005829;GO:0005856;GO:0032991;GO:0043226;GO:0043229;GO:0043231;GO:0043232;GO:0043234;GO:0044464	CADANIAG00002612	CADANIAP00002612	CADANIAT00002612				IPR025799;IPR007857;IPR029063	Arg_MeTrfase;Arg_MeTrfase_PRMT5;SAM-dependent_MTases	ko03013;ko04111				PF05185			PS51678	SAM_MT_PRMT	Protein arginine N-methyltransferase					Emericella nidulans (strain FGSC A4 / ATCC 38163 / CBS 112.46 / NRRL 194 / M139)	Q5BH46_EMENI			NOG291156
Q5B6H9;C8V6I1	+			nucleus;cytosol;organelle;membrane-bounded organelle;intracellular organelle;intracellular membrane-bounded organelle;intracellular part;cytoplasmic part;cell part		nucleus;cytosol;organelle;intracellular organelle;intracellular membrane-bounded organelle;cell part		Methyltransf_16		Completeproteome;Referenceproteome				GO:0005634;GO:0005829;GO:0043226;GO:0043227;GO:0043229;GO:0043231;GO:0044424;GO:0044444;GO:0044464		GO:0005634;GO:0005829;GO:0043226;GO:0043229;GO:0043231;GO:0044464	CADANIAG00004854	CADANIAP00004854	CADANIAT00004854				IPR019410;IPR029063	Nicotinamide_N-MeTfrase-like;SAM-dependent_MTases					PF10294										Emericella nidulans (strain FGSC A4 / ATCC 38163 / CBS 112.46 / NRRL 194 / M139)	Q5B6H9_EMENI			COG0500
Q5BA21;C8VKN1	+		catalytic activity;methyltransferase activity;O-methyltransferase activity;transferase activity;transferase activity, transferring one-carbon groups					Methyltransf_2		Completeproteome;Referenceproteome;S-adenosyl-L-methionine			GO:0003824;GO:0008168;GO:0008171;GO:0016740;GO:0016741				CADANIAG00009347	CADANIAP00009347	CADANIAT00009347				IPR016461;IPR001077;IPR029063;IPR011991	O-MeTrfase_COMT;O_MeTrfase_2;SAM-dependent_MTases;WHTH_DNA-bd_dom					PF00891			PS51683	SAM_OMT_II						Emericella nidulans (strain FGSC A4 / ATCC 38163 / CBS 112.46 / NRRL 194 / M139)	Q5BA21_EMENI			NOG330932
C8V246	+	protein modification process;protein methylation;one-carbon metabolic process;peptide pheromone maturation;protein localization;metabolic process;protein alkylation;cellular process;peptidyl-cysteine methylation;peptidyl-amino acid modification;peptidyl-cysteine modification;peptidyl-L-cysteine methyl ester biosynthetic process from peptidyl-cysteine;protein esterification;peptidyl-cysteine ester…	catalytic activity;protein C-terminal carboxyl O-methyltransferase activity;protein C-terminal S-isoprenylcysteine carboxyl O-methyltransferase activity;methyltransferase activity;O-methyltransferase activity;protein methyltransferase activity;S-adenosylmethionine-dependent methyltransferase activity;carboxyl-O-methyltransferase activity;transferase activity;transferase activity, transferring one…	nuclear inner membrane;endoplasmic reticulum membrane;membrane;integral to membrane;organelle inner membrane;organelle membrane;intrinsic to membrane;nuclear membrane;organelle part;intracellular part;membrane part;nuclear part;endoplasmic reticulum part;cytoplasmic part;intracellular organelle part;cell part	protein modification process;one-carbon metabolic process;metabolic process;protein alkylation;cellular process;peptidyl-amino acid modification;protein metabolic process;macromolecule metabolic process;macromolecule modification;cellular metabolic process;primary metabolic process;small molecule metabolic process;localization;protein maturation;cellular localization	membrane;cell part		ICMT		Completeproteome;Endoplasmicreticulum;Membrane;Methyltransferase;Referenceproteome;S-adenosyl-L-methionine;Transferase;Transmembrane;Transmembranehelix		GO:0006464;GO:0006479;GO:0006730;GO:0007323;GO:0008104;GO:0008152;GO:0008213;GO:0009987;GO:0018125;GO:0018193;GO:0018198;GO:0018229;GO:0018350;GO:0018351;GO:0019538;GO:0032259;GO:0033036;GO:0034613;GO:0043170;GO:0043412;GO:0043414;GO:0044237;GO:0044238;GO:0044260;GO:0044267;GO:0044281;GO:0051179;GO:0051604;GO:0051641;GO:0070727;GO:0071432	GO:0003824;GO:0003880;GO:0004671;GO:0008168;GO:0008171;GO:0008276;GO:0008757;GO:0010340;GO:0016740;GO:0016741;GO:0051998	GO:0005637;GO:0005789;GO:0016020;GO:0016021;GO:0019866;GO:0031090;GO:0031224;GO:0031965;GO:0044422;GO:0044424;GO:0044425;GO:0044428;GO:0044432;GO:0044444;GO:0044446;GO:0044464	GO:0006464;GO:0006730;GO:0008152;GO:0008213;GO:0009987;GO:0018193;GO:0019538;GO:0043170;GO:0043412;GO:0044237;GO:0044238;GO:0044281;GO:0051179;GO:0051604;GO:0051641	GO:0016020;GO:0044464	CADANIAG00006848	CADANIAP00006848	CADANIAT00006848			ANIA_06162	IPR007269;IPR025770	ICMT_MeTrfase;PPMT_MeTrfase					PF04140			PS51564	SAM_ICMT	Protein-S-isoprenylcysteine O-methyltransferase					Emericella nidulans (strain FGSC A4 / ATCC 38163 / CBS 112.46 / NRRL 194 / M139)	C8V246_EMENI		2.1.1.100
Q5AZW8	+		catalytic activity;protein C-terminal carboxyl O-methyltransferase activity;protein C-terminal S-isoprenylcysteine carboxyl O-methyltransferase activity;methyltransferase activity;O-methyltransferase activity;protein methyltransferase activity;S-adenosylmethionine-dependent methyltransferase activity;carboxyl-O-methyltransferase activity;transferase activity;transferase activity, transferring one…	endoplasmic reticulum membrane;membrane;integral to membrane;organelle membrane;intrinsic to membrane;organelle part;intracellular part;membrane part;endoplasmic reticulum part;cytoplasmic part;intracellular organelle part;cell part		membrane;cell part		ICMT		Endoplasmicreticulum;Membrane;Methyltransferase;S-adenosyl-L-methionine;Transferase;Transmembrane;Transmembranehelix			GO:0003824;GO:0003880;GO:0004671;GO:0008168;GO:0008171;GO:0008276;GO:0008757;GO:0010340;GO:0016740;GO:0016741;GO:0051998	GO:0005789;GO:0016020;GO:0016021;GO:0031090;GO:0031224;GO:0044422;GO:0044424;GO:0044425;GO:0044432;GO:0044444;GO:0044446;GO:0044464		GO:0016020;GO:0044464						AN6162.2	IPR007269;IPR025770	ICMT_MeTrfase;PPMT_MeTrfase					PF04140			PS51564	SAM_ICMT	Protein-S-isoprenylcysteine O-methyltransferase					Emericella nidulans (strain FGSC A4 / ATCC 38163 / CBS 112.46 / NRRL 194 / M139)	Q5AZW8_EMENI		2.1.1.100	COG2020
C8V8J7	+	sulfur amino acid metabolic process;sulfur amino acid biosynthetic process;organic acid metabolic process;nucleobase-containing compound metabolic process;purine base metabolic process;cellular amino acid metabolic process;methionine metabolic process;cellular aromatic compound metabolic process;sulfur compound metabolic process;nitrogen compound metabolic process;metabolic process;cellular amino…	catalytic activity;5-methyltetrahydropteroyltriglutamate-homocysteine S-methyltransferase activity;binding;methyltransferase activity;S-methyltransferase activity;zinc ion binding;methionine synthase activity;transferase activity;transferase activity, transferring one-carbon groups;5-methyltetrahydrofolate-dependent methyltransferase activity;5-methyltetrahydropteroyltri-L-glutamate-dependent met…	extracellular region;nucleus;cytosol;organelle;membrane-bounded organelle;intracellular organelle;intracellular membrane-bounded organelle;intracellular part;cytoplasmic part;cell part	organic acid metabolic process;nucleobase-containing compound metabolic process;cellular amino acid metabolic process;cellular aromatic compound metabolic process;sulfur compound metabolic process;nitrogen compound metabolic process;metabolic process;biosynthetic process;amine metabolic process;cellular process;cellular nitrogen compound metabolic process;cellular ketone metabolic process;pigment…	extracellular region;nucleus;cytosol;organelle;intracellular organelle;intracellular membrane-bounded organelle;cell part		Meth_synt_1;Meth_synt_2		Completeproteome;Referenceproteome		GO:0000096;GO:0000097;GO:0006082;GO:0006139;GO:0006144;GO:0006520;GO:0006555;GO:0006725;GO:0006790;GO:0006807;GO:0008152;GO:0008652;GO:0009058;GO:0009066;GO:0009067;GO:0009069;GO:0009086;GO:0009092;GO:0009112;GO:0009113;GO:0009308;GO:0009309;GO:0009987;GO:0016053;GO:0019279;GO:0019280;GO:0019752;GO:0034641;GO:0034654;GO:0042180;GO:0042440;GO:0043436;GO:0044106;GO:0044237;GO:0044238;GO:0044249;GO:…	GO:0003824;GO:0003871;GO:0005488;GO:0008168;GO:0008172;GO:0008270;GO:0008705;GO:0016740;GO:0016741;GO:0042084;GO:0042085;GO:0043167;GO:0043169;GO:0046872;GO:0046914	GO:0005576;GO:0005634;GO:0005829;GO:0043226;GO:0043227;GO:0043229;GO:0043231;GO:0044424;GO:0044444;GO:0044464	GO:0006082;GO:0006139;GO:0006520;GO:0006725;GO:0006790;GO:0006807;GO:0008152;GO:0009058;GO:0009308;GO:0009987;GO:0034641;GO:0042180;GO:0042440;GO:0044237;GO:0044238;GO:0044281;GO:0046483;GO:0055086	GO:0005576;GO:0005634;GO:0005829;GO:0043226;GO:0043229;GO:0043231;GO:0044464	CADANIAG00006008	CADANIAP00006008	CADANIAT00006008			ANIA_04443	IPR013215;IPR006276;IPR002629	Cbl-indep_Met_Synth_N;Cobalamin-indep_Met_synthase;Met_Synth_C/arc					PF08267;PF01717										Emericella nidulans (strain FGSC A4 / ATCC 38163 / CBS 112.46 / NRRL 194 / M139)	C8V8J7_EMENI
Q5AX05	+							Methyltransf_31														AN7175.2	IPR025714;IPR029063	Methyltranfer_dom;SAM-dependent_MTases					PF13847										Emericella nidulans (strain FGSC A4 / ATCC 38163 / CBS 112.46 / NRRL 194 / M139)	Q5AX05_EMENI			COG0500
Q5AXF2	+	nucleobase-containing compound metabolic process;pyrimidine nucleotide metabolic process;pyrimidine nucleotide biosynthetic process;dTMP biosynthetic process;RNA processing;tRNA metabolic process;tRNA modification;nucleoside phosphate metabolic process;nitrogen compound metabolic process;tRNA processing;metabolic process;queuosine biosynthetic process;guanosine metabolic process;7-methylguanosine…	catalytic activity;thymidylate synthase activity;methyltransferase activity;queuine tRNA-ribosyltransferase activity;transferase activity;transferase activity, transferring one-carbon groups;transferase activity, transferring glycosyl groups;transferase activity, transferring pentosyl groups;5,10-methylenetetrahydrofolate-dependent methyltransferase activity		nucleobase-containing compound metabolic process;RNA processing;tRNA metabolic process;nitrogen compound metabolic process;tRNA processing;metabolic process;biosynthetic process;nucleoside metabolic process;nucleotide metabolic process;RNA modification;cellular process;RNA metabolic process;cellular nitrogen compound metabolic process;macromolecule metabolic process;macromolecule modification;cel…		Pyrimidine metabolism;One carbon pool by folate	TGT;Thymidylat_synt				GO:0006139;GO:0006220;GO:0006221;GO:0006231;GO:0006396;GO:0006399;GO:0006400;GO:0006753;GO:0006807;GO:0008033;GO:0008152;GO:0008616;GO:0008617;GO:0008618;GO:0009058;GO:0009116;GO:0009117;GO:0009119;GO:0009123;GO:0009124;GO:0009129;GO:0009130;GO:0009157;GO:0009162;GO:0009163;GO:0009165;GO:0009176;GO:0009177;GO:0009219;GO:0009221;GO:0009262;GO:0009263;GO:0009265;GO:0009394;GO:0009451;GO:0009987;GO:…	GO:0003824;GO:0004799;GO:0008168;GO:0008479;GO:0016740;GO:0016741;GO:0016757;GO:0016763;GO:0042083		GO:0006139;GO:0006396;GO:0006399;GO:0006807;GO:0008033;GO:0008152;GO:0009058;GO:0009116;GO:0009117;GO:0009451;GO:0009987;GO:0016070;GO:0034641;GO:0043170;GO:0043412;GO:0044237;GO:0044238;GO:0044281;GO:0046483;GO:0055086							AN7028.2	IPR004803;IPR023451;IPR000398;IPR020940;IPR002616	Queuine_tRNA-ribosylTrfase;Thymidate_synth/dCMP_Mease;Thymidylate_synthase;Thymidylate_synthase_AS;tRNA_ribo_trans-like	ko00240;ko00670				PF01702;PF00303	PR00108	THYMDSNTHASE	PS00091	THYMIDYLATE_SYNTHASE						Emericella nidulans (strain FGSC A4 / ATCC 38163 / CBS 112.46 / NRRL 194 / M139)	Q5AXF2_EMENI			COG0343
Q5BG07;C8VSV1	+	metabolic process;secondary metabolic process	catalytic activity;transferase activity		metabolic process;secondary metabolic process			Acyl_transf_1;ketoacyl-synt;Ketoacyl-synt_C;NAD_binding_4;PP-binding		Completeproteome;Phosphopantetheine;Referenceproteome		GO:0008152;GO:0019748	GO:0003824;GO:0016740		GO:0008152;GO:0019748		CADANIAG00002162	CADANIAP00002162	CADANIAT00002162				IPR001227;IPR009081;IPR014043;IPR016035;IPR014031;IPR014030;IPR013120;IPR016036;IPR016040;IPR006162;IPR029063;IPR016039;IPR016038	Ac_transferase_dom;Acyl_carrier_prot-like;Acyl_transferase;Acyl_Trfase/lysoPLipase;Ketoacyl_synth_C;Ketoacyl_synth_N;Male_sterile_NAD-bd;Malonyl_transacylase_ACP-bd;NAD(P)-bd_dom;Ppantetheine_attach_site;SAM-dependent_MTases;Thiolase-like;Thiolase-like_subgr					PF00698;PF00109;PF02801;PF07993;PF00550			PS50075;PS00012	ACP_DOMAIN;PHOSPHOPANTETHEINE						Emericella nidulans (strain FGSC A4 / ATCC 38163 / CBS 112.46 / NRRL 194 / M139)	Q5BG07_EMENI			COG3320
Q5BDD5;C8VM60	+	protein modification process;protein methylation;one-carbon metabolic process;metabolic process;protein alkylation;cellular process;peptidyl-histidine methylation;peptidyl-amino acid modification;peptidyl-histidine modification;protein metabolic process;methylation;peptidyl-histidine methylation, to form tele-methylhistidine;macromolecule metabolic process;macromolecule modification;macromolecule…	catalytic activity;methyltransferase activity;N-methyltransferase activity;S-adenosylmethionine-dependent methyltransferase activity;transferase activity;transferase activity, transferring one-carbon groups;protein-histidine N-methyltransferase activity	cytosol;intracellular part;cytoplasmic part;cell part	protein modification process;one-carbon metabolic process;metabolic process;protein alkylation;cellular process;peptidyl-amino acid modification;protein metabolic process;macromolecule metabolic process;macromolecule modification;cellular metabolic process;primary metabolic process;small molecule metabolic process	cytosol;cell part				Completeproteome;Referenceproteome		GO:0006464;GO:0006479;GO:0006730;GO:0008152;GO:0008213;GO:0009987;GO:0018021;GO:0018193;GO:0018202;GO:0019538;GO:0032259;GO:0042038;GO:0043170;GO:0043412;GO:0043414;GO:0044237;GO:0044238;GO:0044260;GO:0044267;GO:0044281	GO:0003824;GO:0008168;GO:0008170;GO:0008757;GO:0016740;GO:0016741;GO:0018064	GO:0005829;GO:0044424;GO:0044444;GO:0044464	GO:0006464;GO:0006730;GO:0008152;GO:0008213;GO:0009987;GO:0018193;GO:0019538;GO:0043170;GO:0043412;GO:0044237;GO:0044238;GO:0044281	GO:0005829;GO:0044464	CADANIAG00008058	CADANIAP00008058	CADANIAT00008058				IPR029063	SAM-dependent_MTases															Emericella nidulans (strain FGSC A4 / ATCC 38163 / CBS 112.46 / NRRL 194 / M139)	Q5BDD5_EMENI			NOG274683
Q5B2W1;C8VEY1	+	chronological cell aging;tRNA wobble base modification;tRNA wobble uridine modification;nucleobase-containing compound metabolic process;RNA processing;tRNA metabolic process;tRNA modification;nitrogen compound metabolic process;aging;cell aging;tRNA processing;metabolic process;RNA modification;cellular process;RNA metabolic process;developmental process;ncRNA processing;cellular nitrogen compou…	catalytic activity;methyltransferase activity;RNA methyltransferase activity;tRNA methyltransferase activity;tRNA (uracil) methyltransferase activity;transferase activity;transferase activity, transferring one-carbon groups	nucleus;cytosol;organelle;membrane-bounded organelle;intracellular organelle;intracellular membrane-bounded organelle;intracellular part;cytoplasmic part;cell part	nucleobase-containing compound metabolic process;RNA processing;tRNA metabolic process;nitrogen compound metabolic process;aging;tRNA processing;metabolic process;RNA modification;cellular process;RNA metabolic process;developmental process;cellular nitrogen compound metabolic process;response to chemical stimulus;response to drug;macromolecule metabolic process;macromolecule modification;cellula…	nucleus;cytosol;organelle;intracellular organelle;intracellular membrane-bounded organelle;cell part		Methyltransf_11		Completeproteome;Referenceproteome		GO:0001300;GO:0002097;GO:0002098;GO:0006139;GO:0006396;GO:0006399;GO:0006400;GO:0006807;GO:0007568;GO:0007569;GO:0008033;GO:0008152;GO:0009451;GO:0009987;GO:0016070;GO:0032502;GO:0034470;GO:0034641;GO:0034660;GO:0035690;GO:0042221;GO:0042493;GO:0043170;GO:0043412;GO:0044237;GO:0044238;GO:0044260;GO:0050896;GO:0051716;GO:0070887;GO:0090304	GO:0003824;GO:0008168;GO:0008173;GO:0008175;GO:0016300;GO:0016740;GO:0016741	GO:0005634;GO:0005829;GO:0043226;GO:0043227;GO:0043229;GO:0043231;GO:0044424;GO:0044444;GO:0044464	GO:0006139;GO:0006396;GO:0006399;GO:0006807;GO:0007568;GO:0008033;GO:0008152;GO:0009451;GO:0009987;GO:0016070;GO:0032502;GO:0034641;GO:0042221;GO:0042493;GO:0043170;GO:0043412;GO:0044237;GO:0044238;GO:0050896	GO:0005634;GO:0005829;GO:0043226;GO:0043229;GO:0043231;GO:0044464	CADANIAG00003103	CADANIAP00003103	CADANIAT00003103				IPR013216;IPR029063	Methyltransf_11;SAM-dependent_MTases					PF08241										Emericella nidulans (strain FGSC A4 / ATCC 38163 / CBS 112.46 / NRRL 194 / M139)	Q5B2W1_EMENI			COG0500
Q5AWR6;C8VCU6	+									Completeproteome;Referenceproteome							CADANIAG00000178	CADANIAP00000178	CADANIAT00000178				IPR029063	SAM-dependent_MTases															Emericella nidulans (strain FGSC A4 / ATCC 38163 / CBS 112.46 / NRRL 194 / M139)	Q5AWR6_EMENI			NOG323835
C8VQG9	+	reproduction;developmental process involved in reproduction;organic acid metabolic process;cellular aromatic compound metabolic process;one-carbon metabolic process;sulfur compound metabolic process;nitrogen compound metabolic process;metabolic process;amine metabolic process;toxin metabolic process;regulation of biosynthetic process;positive regulation of biosynthetic process;positive regulation…	catalytic activity;methyltransferase activity;S-adenosylmethionine-dependent methyltransferase activity;transferase activity;transferase activity, transferring one-carbon groups	nucleus;cytoplasm;organelle;membrane-bounded organelle;intracellular organelle;intracellular membrane-bounded organelle;intracellular part;cell part	reproduction;organic acid metabolic process;cellular aromatic compound metabolic process;one-carbon metabolic process;sulfur compound metabolic process;nitrogen compound metabolic process;metabolic process;amine metabolic process;toxin metabolic process;cellular process;drug metabolic process;secondary metabolic process;cell differentiation;ascospore formation;developmental process;cellular nitro…	nucleus;cytoplasm;organelle;intracellular organelle;intracellular membrane-bounded organelle;cell part				Completeproteome;Referenceproteome		GO:0000003;GO:0003006;GO:0006082;GO:0006725;GO:0006730;GO:0006790;GO:0006807;GO:0008152;GO:0009308;GO:0009404;GO:0009889;GO:0009891;GO:0009893;GO:0009987;GO:0010565;GO:0010720;GO:0010913;GO:0010914;GO:0016999;GO:0017144;GO:0019222;GO:0019748;GO:0019752;GO:0019953;GO:0022413;GO:0022414;GO:0022603;GO:0030154;GO:0030435;GO:0030437;GO:0030653;GO:0031323;GO:0031325;GO:0031326;GO:0031328;GO:0032259;GO:…	GO:0003824;GO:0008168;GO:0008757;GO:0016740;GO:0016741	GO:0005634;GO:0005737;GO:0043226;GO:0043227;GO:0043229;GO:0043231;GO:0044424;GO:0044464	GO:0000003;GO:0006082;GO:0006725;GO:0006730;GO:0006790;GO:0006807;GO:0008152;GO:0009308;GO:0009404;GO:0009987;GO:0017144;GO:0019748;GO:0030154;GO:0030437;GO:0032502;GO:0034641;GO:0042180;GO:0043603;GO:0043934;GO:0044237;GO:0044281;GO:0044419;GO:0046483;GO:0048468;GO:0048646;GO:0048856;GO:0051704;GO:0065007	GO:0005634;GO:0005737;GO:0043226;GO:0043229;GO:0043231;GO:0044464	CADANIAG00001854	CADANIAP00001854	CADANIAT00001854			laeA	IPR029063	SAM-dependent_MTases															Emericella nidulans (strain FGSC A4 / ATCC 38163 / CBS 112.46 / NRRL 194 / M139)	C8VQG9_EMENI
C8UZY1	+	one-carbon metabolic process;metabolic process;cellular process;methylation;cellular metabolic process;small molecule metabolic process	catalytic activity;methyltransferase activity;S-adenosylmethionine-dependent methyltransferase activity;transferase activity;transferase activity, transferring one-carbon groups	mitochondrion;organelle;membrane-bounded organelle;intracellular organelle;intracellular membrane-bounded organelle;intracellular part;cytoplasmic part;cell part	one-carbon metabolic process;metabolic process;cellular process;cellular metabolic process;small molecule metabolic process	mitochondrion;organelle;intracellular organelle;intracellular membrane-bounded organelle;cell part				Completeproteome;Referenceproteome		GO:0006730;GO:0008152;GO:0009987;GO:0032259;GO:0044237;GO:0044281	GO:0003824;GO:0008168;GO:0008757;GO:0016740;GO:0016741	GO:0005739;GO:0043226;GO:0043227;GO:0043229;GO:0043231;GO:0044424;GO:0044444;GO:0044464	GO:0006730;GO:0008152;GO:0009987;GO:0044237;GO:0044281	GO:0005739;GO:0043226;GO:0043229;GO:0043231;GO:0044464	CADANIAG00007163	CADANIAP00007163	CADANIAT00007163			ANIA_05874	IPR029063	SAM-dependent_MTases															Emericella nidulans (strain FGSC A4 / ATCC 38163 / CBS 112.46 / NRRL 194 / M139)	C8UZY1_EMENI
Q5BCE6;C8VPE2	+		catalytic activity;transferase activity					Acyl_transf_1;ketoacyl-synt;Ketoacyl-synt_C;KR;Methyltransf_12;PP-binding;PS-DH		Completeproteome;Phosphopantetheine;Referenceproteome;Transferase			GO:0003824;GO:0016740				CADANIAG00008431	CADANIAP00008431	CADANIAT00008431				IPR001227;IPR009081;IPR014043;IPR016035;IPR018201;IPR014031;IPR014030;IPR016036;IPR013217;IPR016040;IPR020801;IPR020841;IPR020807;IPR013968;IPR006162;IPR029063;IPR016039;IPR016038	Ac_transferase_dom;Acyl_carrier_prot-like;Acyl_transferase;Acyl_Trfase/lysoPLipase;Ketoacyl_synth_AS;Ketoacyl_synth_C;Ketoacyl_synth_N;Malonyl_transacylase_ACP-bd;Methyltransf_12;NAD(P)-bd_dom;PKS_acyl_transferase;PKS_Beta-ketoAc_synthase_dom;PKS_dehydratase;PKS_KR;Ppantetheine_attach_site;SAM-dependent_MTases;Thiolase-like;Thiolase-like_subgr					PF00698;PF00109;PF02801;PF08659;PF08242;PF00550;PF14765			PS50075;PS00606;PS00012	ACP_DOMAIN;B_KETOACYL_SYNTHASE;PHOSPHOPANTETHEINE				SM00827;SM00826;SM00822;SM00825	PKS_AT;PKS_DH;PKS_KR;PKS_KS	Emericella nidulans (strain FGSC A4 / ATCC 38163 / CBS 112.46 / NRRL 194 / M139)	Q5BCE6_EMENI			COG3321
Q5B0Z1;C8VFD9	+	ribosomal subunit export from nucleus;ribosomal small subunit export from nucleus;rRNA modification;cellular bud site selection;endonucleolytic cleavage in ITS1 to separate SSU-rRNA from 5.8S rRNA and LSU-rRNA from tricistronic rRNA transcript (SSU-rRNA, 5.8S rRNA, LSU-rRNA);cleavage involved in rRNA processing;endonucleolytic cleavage involved in rRNA processing;endonucleolytic cleavage of trici…	catalytic activity;methyltransferase activity;RNA methyltransferase activity;rRNA methyltransferase activity;S-adenosylmethionine-dependent methyltransferase activity;rRNA (guanine) methyltransferase activity;transferase activity;transferase activity, transferring one-carbon groups	nucleolus;cytosol;organelle;non-membrane-bounded organelle;intracellular organelle;intracellular non-membrane-bounded organelle;organelle part;intracellular part;nuclear part;cytoplasmic part;intracellular organelle part;cell part	ribosomal subunit export from nucleus;nucleobase-containing compound metabolic process;rRNA processing;RNA processing;one-carbon metabolic process;nitrogen compound metabolic process;transport;nucleocytoplasmic transport;establishment or maintenance of cell polarity;metabolic process;RNA modification;cellular process;RNA metabolic process;cellular nitrogen compound metabolic process;macromolecule…	nucleolus;cytosol;organelle;intracellular organelle;intracellular non-membrane-bounded organelle;cell part		Methyltransf_11;WBS_methylT		Completeproteome;Referenceproteome		GO:0000054;GO:0000056;GO:0000154;GO:0000282;GO:0000447;GO:0000469;GO:0000478;GO:0000479;GO:0001510;GO:0006139;GO:0006364;GO:0006396;GO:0006730;GO:0006807;GO:0006810;GO:0006913;GO:0007105;GO:0007163;GO:0008152;GO:0009451;GO:0009987;GO:0016070;GO:0016072;GO:0030010;GO:0031167;GO:0032259;GO:0032506;GO:0033753;GO:0034470;GO:0034641;GO:0034660;GO:0043170;GO:0043412;GO:0043414;GO:0044237;GO:0044238;GO:…	GO:0003824;GO:0008168;GO:0008173;GO:0008649;GO:0008757;GO:0016435;GO:0016740;GO:0016741	GO:0005730;GO:0005829;GO:0043226;GO:0043228;GO:0043229;GO:0043232;GO:0044422;GO:0044424;GO:0044428;GO:0044444;GO:0044446;GO:0044464	GO:0000054;GO:0006139;GO:0006364;GO:0006396;GO:0006730;GO:0006807;GO:0006810;GO:0006913;GO:0007163;GO:0008152;GO:0009451;GO:0009987;GO:0016070;GO:0034641;GO:0043170;GO:0043412;GO:0044237;GO:0044238;GO:0044281;GO:0051169;GO:0051179;GO:0051234;GO:0051641	GO:0005730;GO:0005829;GO:0043226;GO:0043229;GO:0043232;GO:0044464	CADANIAG00003261	CADANIAP00003261	CADANIAT00003261				IPR013216;IPR029063;IPR022238	Methyltransf_11;SAM-dependent_MTases;Unchr_MeTrfase_Williams-Beuren					PF08241;PF12589										Emericella nidulans (strain FGSC A4 / ATCC 38163 / CBS 112.46 / NRRL 194 / M139)	Q5B0Z1_EMENI			COG0500
Q5B7E3;C8V4S0	+		catalytic activity;methyltransferase activity;O-methyltransferase activity;transferase activity;transferase activity, transferring one-carbon groups					Methyltransf_3		Completeproteome;Referenceproteome			GO:0003824;GO:0008168;GO:0008171;GO:0016740;GO:0016741				CADANIAG00005211	CADANIAP00005211	CADANIAT00005211				IPR002935;IPR029063	O-MeTrfase_3;SAM-dependent_MTases					PF01596			PS51682	SAM_OMT_I						Emericella nidulans (strain FGSC A4 / ATCC 38163 / CBS 112.46 / NRRL 194 / M139)	Q5B7E3_EMENI			COG4122
Q5B655;C8V5X1	+	one-carbon metabolic process;metabolic process;cellular process;methylation;cellular metabolic process;small molecule metabolic process	catalytic activity;methyltransferase activity;S-adenosylmethionine-dependent methyltransferase activity;transferase activity;transferase activity, transferring one-carbon groups	cytoplasm;intracellular part;cell part	one-carbon metabolic process;metabolic process;cellular process;cellular metabolic process;small molecule metabolic process	cytoplasm;cell part				Completeproteome;Referenceproteome		GO:0006730;GO:0008152;GO:0009987;GO:0032259;GO:0044237;GO:0044281	GO:0003824;GO:0008168;GO:0008757;GO:0016740;GO:0016741	GO:0005737;GO:0044424;GO:0044464	GO:0006730;GO:0008152;GO:0009987;GO:0044237;GO:0044281	GO:0005737;GO:0044464	CADANIAG00004714	CADANIAP00004714	CADANIAT00004714				IPR029063	SAM-dependent_MTases															Emericella nidulans (strain FGSC A4 / ATCC 38163 / CBS 112.46 / NRRL 194 / M139)	Q5B655_EMENI			NOG248563
Q5AWF5;C8VCH1	+	lipid metabolic process;one-carbon metabolic process;metabolic process;lipid biosynthetic process;biosynthetic process;cellular process;methylation;cellular metabolic process;primary metabolic process;small molecule metabolic process	catalytic activity;methyltransferase activity;S-adenosylmethionine-dependent methyltransferase activity;transferase activity;transferase activity, transferring one-carbon groups	cytoplasm;intracellular part;cell part	lipid metabolic process;one-carbon metabolic process;metabolic process;biosynthetic process;cellular process;cellular metabolic process;primary metabolic process;small molecule metabolic process	cytoplasm;cell part		CMAS		Completeproteome;Referenceproteome		GO:0006629;GO:0006730;GO:0008152;GO:0008610;GO:0009058;GO:0009987;GO:0032259;GO:0044237;GO:0044238;GO:0044281	GO:0003824;GO:0008168;GO:0008757;GO:0016740;GO:0016741	GO:0005737;GO:0044424;GO:0044464	GO:0006629;GO:0006730;GO:0008152;GO:0009058;GO:0009987;GO:0044237;GO:0044238;GO:0044281	GO:0005737;GO:0044464	CADANIAG00000053	CADANIAP00000053	CADANIAT00000053				IPR003333;IPR029063	Mycolic_cyclopropane_synthase;SAM-dependent_MTases					PF02353										Emericella nidulans (strain FGSC A4 / ATCC 38163 / CBS 112.46 / NRRL 194 / M139)	Q5AWF5_EMENI			COG2230
Q5B3V6;C8VAP4	+	sulfur amino acid metabolic process;sulfur amino acid biosynthetic process;sulfate assimilation;organic acid metabolic process;cellular amino acid metabolic process;methionine metabolic process;porphyrin-containing compound metabolic process;porphyrin-containing compound biosynthetic process;heme biosynthetic process;sulfur compound metabolic process;nitrogen compound metabolic process;metabolic …	catalytic activity;uroporphyrin-III C-methyltransferase activity;methyltransferase activity;C-methyltransferase activity;S-adenosylmethionine-dependent methyltransferase activity;oxidoreductase activity;oxidoreductase activity, acting on the CH-CH group of donors;oxidoreductase activity, acting on the CH-CH group of donors, NAD or NADP as acceptor;transferase activity;transferase activity, transf…		organic acid metabolic process;cellular amino acid metabolic process;sulfur compound metabolic process;nitrogen compound metabolic process;metabolic process;biosynthetic process;amine metabolic process;cellular process;cellular nitrogen compound metabolic process;cellular ketone metabolic process;pigment metabolic process;cellular metabolic process;primary metabolic process;small molecule metabol…		Porphyrin and chlorophyll metabolism	NAD_binding_7;Sirohm_synth_C;TP_methylase		Completeproteome;Methyltransferase;Referenceproteome;Transferase		GO:0000096;GO:0000097;GO:0000103;GO:0006082;GO:0006520;GO:0006555;GO:0006778;GO:0006779;GO:0006783;GO:0006790;GO:0006807;GO:0008152;GO:0008652;GO:0009058;GO:0009066;GO:0009067;GO:0009086;GO:0009308;GO:0009309;GO:0009987;GO:0016053;GO:0018130;GO:0019354;GO:0019752;GO:0033013;GO:0033014;GO:0034641;GO:0042168;GO:0042180;GO:0042440;GO:0043436;GO:0044106;GO:0044237;GO:0044238;GO:0044249;GO:0044271;GO:…	GO:0003824;GO:0004851;GO:0008168;GO:0008169;GO:0008757;GO:0016491;GO:0016627;GO:0016628;GO:0016740;GO:0016741;GO:0043115		GO:0006082;GO:0006520;GO:0006790;GO:0006807;GO:0008152;GO:0009058;GO:0009308;GO:0009987;GO:0034641;GO:0042180;GO:0042440;GO:0044237;GO:0044238;GO:0044281;GO:0046483;GO:0051186		CADANIAG00005648	CADANIAP00005648	CADANIAT00005648				IPR000878;IPR014777;IPR014776;IPR028162;IPR016040;IPR006367;IPR012066;IPR003043	4pyrrol_Mease;4pyrrole_Mease_sub1;4pyrrole_Mease_sub2;Met8_C;NAD(P)-bd_dom;Sirohaem_synthase_N;SUMT_yeast;Uropor_MeTrfase_CS	ko00860				PF13241;PF14823;PF00590			PS00840	SUMT_2						Emericella nidulans (strain FGSC A4 / ATCC 38163 / CBS 112.46 / NRRL 194 / M139)	Q5B3V6_EMENI			COG0007
C8VKT7	+	nucleobase-containing compound metabolic process;transcription, DNA-dependent;transcription from RNA polymerase II promoter;nitrogen compound metabolic process;metabolic process;biosynthetic process;macromolecule biosynthetic process;cellular process;RNA metabolic process;RNA biosynthetic process;cellular nitrogen compound metabolic process;cellular macromolecule biosynthetic process;macromolecul…	nucleic acid binding;RNA binding;catalytic activity;mRNA (guanine-N7-)-methyltransferase activity;binding;methyltransferase activity;N-methyltransferase activity;RNA methyltransferase activity;mRNA methyltransferase activity;S-adenosylmethionine-dependent methyltransferase activity;transferase activity;transferase activity, transferring one-carbon groups	cytosol;DNA-directed RNA polymerase II, holoenzyme;cell division site;macromolecular complex;protein complex;organelle part;intracellular part;nuclear part;cytoplasmic part;intracellular organelle part;nucleoplasm part;cell part;P-TEFb-cap methyltransferase complex	nucleobase-containing compound metabolic process;transcription from RNA polymerase II promoter;nitrogen compound metabolic process;metabolic process;biosynthetic process;cellular process;RNA metabolic process;cellular nitrogen compound metabolic process;macromolecule metabolic process;cellular metabolic process;primary metabolic process	cytosol;DNA-directed RNA polymerase II, holoenzyme;cell division site;macromolecular complex;protein complex;cell part		Pox_MCEL		Completeproteome;Methyltransferase;mRNAcapping;mRNAprocessing;Nucleus;Referenceproteome;RNA-binding;S-adenosyl-L-methionine;Transferase		GO:0006139;GO:0006351;GO:0006366;GO:0006807;GO:0008152;GO:0009058;GO:0009059;GO:0009987;GO:0016070;GO:0032774;GO:0034641;GO:0034645;GO:0043170;GO:0044237;GO:0044238;GO:0044249;GO:0044260;GO:0090304	GO:0003676;GO:0003723;GO:0003824;GO:0004482;GO:0005488;GO:0008168;GO:0008170;GO:0008173;GO:0008174;GO:0008757;GO:0016740;GO:0016741	GO:0005829;GO:0016591;GO:0032153;GO:0032991;GO:0043234;GO:0044422;GO:0044424;GO:0044428;GO:0044444;GO:0044446;GO:0044451;GO:0044464;GO:0070693	GO:0006139;GO:0006366;GO:0006807;GO:0008152;GO:0009058;GO:0009987;GO:0016070;GO:0034641;GO:0043170;GO:0044237;GO:0044238	GO:0005829;GO:0016591;GO:0032153;GO:0032991;GO:0043234;GO:0044464	CADANIAG00008575	CADANIAP00008575	CADANIAT00008575			ANIA_10239	IPR016899;IPR004971;IPR029063	mRNA_G-N7_MeTrfase;mRNA_G-N7_MeTrfase_dom;SAM-dependent_MTases					PF03291			PS51562	RNA_CAP0_MT	mRNA cap guanine-N7 methyltransferase					Emericella nidulans (strain FGSC A4 / ATCC 38163 / CBS 112.46 / NRRL 194 / M139)	C8VKT7_EMENI		2.1.1.56
Q5B0Q9	+		catalytic activity;methyltransferase activity;transferase activity;transferase activity, transferring one-carbon groups					Methyltransf_8					GO:0003824;GO:0008168;GO:0016740;GO:0016741									AN5871.2	IPR007823;IPR029063	Methyltransferase-rel;SAM-dependent_MTases					PF05148										Emericella nidulans (strain FGSC A4 / ATCC 38163 / CBS 112.46 / NRRL 194 / M139)	Q5B0Q9_EMENI
C8VIR5	+	organic acid metabolic process;cellular amino acid metabolic process;glycine metabolic process;L-serine metabolic process;cellular aromatic compound metabolic process;one-carbon metabolic process;coenzyme metabolic process;folic acid-containing compound metabolic process;nitrogen compound metabolic process;metabolic process;serine family amino acid metabolic process;amine metabolic process;cellul…	catalytic activity;glycine hydroxymethyltransferase activity;binding;transferase activity;transferase activity, transferring one-carbon groups;hydroxymethyl-, formyl- and related transferase activity;vitamin binding;pyridoxal phosphate binding;cofactor binding;vitamin B6 binding	cytoplasm;intracellular part;cell part	organic acid metabolic process;cellular amino acid metabolic process;cellular aromatic compound metabolic process;one-carbon metabolic process;nitrogen compound metabolic process;metabolic process;amine metabolic process;cellular process;cellular nitrogen compound metabolic process;cellular ketone metabolic process;cellular metabolic process;primary metabolic process;small molecule metabolic proc…	cytoplasm;cell part		SHMT		Completeproteome;One-carbonmetabolism;Pyridoxalphosphate;Referenceproteome;Transferase		GO:0006082;GO:0006520;GO:0006544;GO:0006563;GO:0006725;GO:0006730;GO:0006732;GO:0006760;GO:0006807;GO:0008152;GO:0009069;GO:0009308;GO:0009987;GO:0019752;GO:0034641;GO:0035999;GO:0042180;GO:0042558;GO:0043436;GO:0044106;GO:0044237;GO:0044238;GO:0044281;GO:0046483;GO:0046653;GO:0051186	GO:0003824;GO:0004372;GO:0005488;GO:0016740;GO:0016741;GO:0016742;GO:0019842;GO:0030170;GO:0048037;GO:0070279	GO:0005737;GO:0044424;GO:0044464	GO:0006082;GO:0006520;GO:0006725;GO:0006730;GO:0006807;GO:0008152;GO:0009308;GO:0009987;GO:0034641;GO:0042180;GO:0044237;GO:0044238;GO:0044281;GO:0046483;GO:0051186	GO:0005737;GO:0044464	CADANIAG00010021	CADANIAP00010021	CADANIAT00010021			ANIA_03058	IPR015424;IPR015421;IPR015422;IPR001085;IPR019798	PyrdxlP-dep_Trfase;PyrdxlP-dep_Trfase_major_sub1;PyrdxlP-dep_Trfase_major_sub2;Ser_HO-MeTrfase;Ser_HO-MeTrfase_PLP_BS					PF00464			PS00096	SHMT	Serine hydroxymethyltransferase					Emericella nidulans (strain FGSC A4 / ATCC 38163 / CBS 112.46 / NRRL 194 / M139)	C8VIR5_EMENI		2.1.2.1
C8V1Q1	+	rRNA modification;RNA methylation;nucleobase-containing compound metabolic process;rRNA processing;RNA processing;one-carbon metabolic process;nitrogen compound metabolic process;metabolic process;RNA modification;cellular process;RNA metabolic process;rRNA metabolic process;rRNA methylation;methylation;ncRNA processing;cellular nitrogen compound metabolic process;ncRNA metabolic process;macromol…		nucleus;cytosol;organelle;membrane-bounded organelle;intracellular organelle;intracellular membrane-bounded organelle;intracellular part;cytoplasmic part;cell part	nucleobase-containing compound metabolic process;rRNA processing;RNA processing;one-carbon metabolic process;nitrogen compound metabolic process;metabolic process;RNA modification;cellular process;RNA metabolic process;cellular nitrogen compound metabolic process;macromolecule metabolic process;macromolecule modification;cellular metabolic process;primary metabolic process;small molecule metaboli…	nucleus;cytosol;organelle;intracellular organelle;intracellular membrane-bounded organelle;cell part		Methyltransf_10		Completeproteome;Referenceproteome		GO:0000154;GO:0001510;GO:0006139;GO:0006364;GO:0006396;GO:0006730;GO:0006807;GO:0008152;GO:0009451;GO:0009987;GO:0016070;GO:0016072;GO:0031167;GO:0032259;GO:0034470;GO:0034641;GO:0034660;GO:0043170;GO:0043412;GO:0043414;GO:0044237;GO:0044238;GO:0044260;GO:0044281;GO:0070475;GO:0090304		GO:0005634;GO:0005829;GO:0043226;GO:0043227;GO:0043229;GO:0043231;GO:0044424;GO:0044444;GO:0044464	GO:0006139;GO:0006364;GO:0006396;GO:0006730;GO:0006807;GO:0008152;GO:0009451;GO:0009987;GO:0016070;GO:0034641;GO:0043170;GO:0043412;GO:0044237;GO:0044238;GO:0044281	GO:0005634;GO:0005829;GO:0043226;GO:0043229;GO:0043231;GO:0044464	CADANIAG00007501	CADANIAP00007501	CADANIAT00007501			ANIA_06713	IPR010286;IPR029063	rRNA_lsu_MeTfrase_F-like;SAM-dependent_MTases					PF05971										Emericella nidulans (strain FGSC A4 / ATCC 38163 / CBS 112.46 / NRRL 194 / M139)	C8V1Q1_EMENI
C8VJU3	+	one-carbon metabolic process;metabolic process;cellular process;methylation;cellular metabolic process;small molecule metabolic process	catalytic activity;methyltransferase activity;S-adenosylmethionine-dependent methyltransferase activity;transferase activity;transferase activity, transferring one-carbon groups	cytoplasm;intracellular part;cell part	one-carbon metabolic process;metabolic process;cellular process;cellular metabolic process;small molecule metabolic process	cytoplasm;cell part				Completeproteome;Referenceproteome		GO:0006730;GO:0008152;GO:0009987;GO:0032259;GO:0044237;GO:0044281	GO:0003824;GO:0008168;GO:0008757;GO:0016740;GO:0016741	GO:0005737;GO:0044424;GO:0044464	GO:0006730;GO:0008152;GO:0009987;GO:0044237;GO:0044281	GO:0005737;GO:0044464	CADANIAG00009404	CADANIAP00009404	CADANIAT00009404			ANIA_09193	IPR029063	SAM-dependent_MTases															Emericella nidulans (strain FGSC A4 / ATCC 38163 / CBS 112.46 / NRRL 194 / M139)	C8VJU3_EMENI
Q5BF73	+																					AN0807.2	IPR029063	SAM-dependent_MTases															Emericella nidulans (strain FGSC A4 / ATCC 38163 / CBS 112.46 / NRRL 194 / M139)	Q5BF73_EMENI			NOG135044
C8VBS8	+	one-carbon metabolic process;metabolic process;cellular process;methylation;cellular metabolic process;small molecule metabolic process	catalytic activity;methyltransferase activity;S-adenosylmethionine-dependent methyltransferase activity;transferase activity;transferase activity, transferring one-carbon groups	cytoplasm;intracellular part;cell part	one-carbon metabolic process;metabolic process;cellular process;cellular metabolic process;small molecule metabolic process	cytoplasm;cell part		Methyltransf_11		Completeproteome;Referenceproteome		GO:0006730;GO:0008152;GO:0009987;GO:0032259;GO:0044237;GO:0044281	GO:0003824;GO:0008168;GO:0008757;GO:0016740;GO:0016741	GO:0005737;GO:0044424;GO:0044464	GO:0006730;GO:0008152;GO:0009987;GO:0044237;GO:0044281	GO:0005737;GO:0044464	CADANIAG00000698	CADANIAP00000698	CADANIAT00000698			ANIA_10964	IPR013216;IPR029063	Methyltransf_11;SAM-dependent_MTases					PF08241										Emericella nidulans (strain FGSC A4 / ATCC 38163 / CBS 112.46 / NRRL 194 / M139)	C8VBS8_EMENI
C8VM99	+	one-carbon metabolic process;metabolic process;cellular process;methylation;cellular metabolic process;small molecule metabolic process	catalytic activity;methyltransferase activity;S-adenosylmethionine-dependent methyltransferase activity;transferase activity;transferase activity, transferring one-carbon groups	cytoplasm;intracellular part;cell part	one-carbon metabolic process;metabolic process;cellular process;cellular metabolic process;small molecule metabolic process	cytoplasm;cell part				Completeproteome;Referenceproteome		GO:0006730;GO:0008152;GO:0009987;GO:0032259;GO:0044237;GO:0044281	GO:0003824;GO:0008168;GO:0008757;GO:0016740;GO:0016741	GO:0005737;GO:0044424;GO:0044464	GO:0006730;GO:0008152;GO:0009987;GO:0044237;GO:0044281	GO:0005737;GO:0044464	CADANIAG00008843	CADANIAP00008843	CADANIAT00008843			ANIA_02165	IPR029063	SAM-dependent_MTases															Emericella nidulans (strain FGSC A4 / ATCC 38163 / CBS 112.46 / NRRL 194 / M139)	C8VM99_EMENI
Q5ASD1;C8V9N9	+		catalytic activity;methyltransferase activity;RNA methyltransferase activity;tRNA methyltransferase activity;S-adenosylmethionine-dependent methyltransferase activity;tRNA (adenine) methyltransferase activity;tRNA (adenine-N1-)-methyltransferase activity;transferase activity;transferase activity, transferring one-carbon groups	nucleus;cytosol;tRNA (m1A) methyltransferase complex;macromolecular complex;methyltransferase complex;organelle;membrane-bounded organelle;intracellular organelle;intracellular membrane-bounded organelle;protein complex;tRNA methyltransferase complex;intracellular part;cytoplasmic part;cell part		nucleus;cytosol;macromolecular complex;organelle;intracellular organelle;intracellular membrane-bounded organelle;protein complex;tRNA methyltransferase complex;cell part		GCD14		Completeproteome;Referenceproteome			GO:0003824;GO:0008168;GO:0008173;GO:0008175;GO:0008757;GO:0016426;GO:0016429;GO:0016740;GO:0016741	GO:0005634;GO:0005829;GO:0031515;GO:0032991;GO:0034708;GO:0043226;GO:0043227;GO:0043229;GO:0043231;GO:0043234;GO:0043527;GO:0044424;GO:0044444;GO:0044464		GO:0005634;GO:0005829;GO:0032991;GO:0043226;GO:0043229;GO:0043231;GO:0043234;GO:0043527;GO:0044464	CADANIAG00006263	CADANIAP00006263	CADANIAT00006263				IPR029063;IPR014816	SAM-dependent_MTases;tRNA_MeTrfase_Gcd14					PF08704			PS51620	SAM_TRM61						Emericella nidulans (strain FGSC A4 / ATCC 38163 / CBS 112.46 / NRRL 194 / M139)	Q5ASD1_EMENI			COG2519
Q5B6W3;C8V7D4	+	one-carbon metabolic process;metabolic process;cellular process;methylation;cellular metabolic process;small molecule metabolic process	catalytic activity;methyltransferase activity;S-adenosylmethionine-dependent methyltransferase activity;transferase activity;transferase activity, transferring one-carbon groups	nucleus;cytoplasm;cytosol;organelle;membrane-bounded organelle;intracellular organelle;intracellular membrane-bounded organelle;intracellular part;cytoplasmic part;cell part	one-carbon metabolic process;metabolic process;cellular process;cellular metabolic process;small molecule metabolic process	nucleus;cytoplasm;cytosol;organelle;intracellular organelle;intracellular membrane-bounded organelle;cell part				Completeproteome;Referenceproteome		GO:0006730;GO:0008152;GO:0009987;GO:0032259;GO:0044237;GO:0044281	GO:0003824;GO:0008168;GO:0008757;GO:0016740;GO:0016741	GO:0005634;GO:0005737;GO:0005829;GO:0043226;GO:0043227;GO:0043229;GO:0043231;GO:0044424;GO:0044444;GO:0044464	GO:0006730;GO:0008152;GO:0009987;GO:0044237;GO:0044281	GO:0005634;GO:0005737;GO:0005829;GO:0043226;GO:0043229;GO:0043231;GO:0044464	CADANIAG00005008	CADANIAP00005008	CADANIAT00005008				IPR029063	SAM-dependent_MTases															Emericella nidulans (strain FGSC A4 / ATCC 38163 / CBS 112.46 / NRRL 194 / M139)	Q5B6W3_EMENI			COG0500
Q5BEJ4;C8VTX6	+	metabolic process;secondary metabolic process	catalytic activity;oxidoreductase activity;transferase activity		metabolic process;secondary metabolic process			Acyl_transf_1;ketoacyl-synt;Ketoacyl-synt_C;KR;Methyltransf_12;PP-binding;PS-DH		Completeproteome;Phosphopantetheine;Referenceproteome		GO:0008152;GO:0019748	GO:0003824;GO:0016491;GO:0016740		GO:0008152;GO:0019748		CADANIAG00001610	CADANIAP00001610	CADANIAT00001610				IPR001227;IPR009081;IPR014043;IPR016035;IPR011032;IPR014031;IPR014030;IPR016036;IPR013217;IPR016040;IPR020801;IPR020841;IPR020807;IPR020843;IPR013968;IPR006162;IPR029063;IPR016039;IPR016038	Ac_transferase_dom;Acyl_carrier_prot-like;Acyl_transferase;Acyl_Trfase/lysoPLipase;GroES-like;Ketoacyl_synth_C;Ketoacyl_synth_N;Malonyl_transacylase_ACP-bd;Methyltransf_12;NAD(P)-bd_dom;PKS_acyl_transferase;PKS_Beta-ketoAc_synthase_dom;PKS_dehydratase;PKS_ER;PKS_KR;Ppantetheine_attach_site;SAM-dependent_MTases;Thiolase-like;Thiolase-like_subgr					PF00698;PF00109;PF02801;PF08659;PF08242;PF00550;PF14765			PS50075;PS00012	ACP_DOMAIN;PHOSPHOPANTETHEINE				SM00827;SM00826;SM00829;SM00822;SM00825	PKS_AT;PKS_DH;PKS_ER;PKS_KR;PKS_KS	Emericella nidulans (strain FGSC A4 / ATCC 38163 / CBS 112.46 / NRRL 194 / M139)	Q5BEJ4_EMENI			COG3321
Q5AS01	+	transport;cellular process;establishment of localization;transmembrane transport		integral to membrane;intrinsic to membrane;membrane part;cell part	transport;cellular process;establishment of localization;transmembrane transport	cell part		MFS_1;N2227				GO:0006810;GO:0009987;GO:0051234;GO:0055085		GO:0016021;GO:0031224;GO:0044425;GO:0044464	GO:0006810;GO:0009987;GO:0051234;GO:0055085	GO:0044464						AN8929.2	IPR002678;IPR011701;IPR020846;IPR012901;IPR029063	GTP_cyclohydrolase_I/Nif3;MFS;MFS_dom;N2227;SAM-dependent_MTases					PF07690;PF07942										Emericella nidulans (strain FGSC A4 / ATCC 38163 / CBS 112.46 / NRRL 194 / M139)	Q5AS01_EMENI			NOG304711
Q5BFD5	+	nucleobase-containing compound metabolic process;rRNA processing;RNA processing;tRNA metabolic process;nitrogen compound metabolic process;tRNA processing;metabolic process;cellular process;RNA metabolic process;rRNA metabolic process;ncRNA processing;cellular nitrogen compound metabolic process;ncRNA metabolic process;macromolecule metabolic process;cellular metabolic process;primary metabolic p…	nucleic acid binding;RNA binding;catalytic activity;binding;methyltransferase activity;transferase activity;transferase activity, transferring one-carbon groups		nucleobase-containing compound metabolic process;rRNA processing;RNA processing;tRNA metabolic process;nitrogen compound metabolic process;tRNA processing;metabolic process;cellular process;RNA metabolic process;cellular nitrogen compound metabolic process;macromolecule metabolic process;cellular metabolic process;primary metabolic process		Ribosome biogenesis in eukaryotes	Fibrillarin				GO:0006139;GO:0006364;GO:0006396;GO:0006399;GO:0006807;GO:0008033;GO:0008152;GO:0009987;GO:0016070;GO:0016072;GO:0034470;GO:0034641;GO:0034660;GO:0043170;GO:0044237;GO:0044238;GO:0044260;GO:0090304	GO:0003676;GO:0003723;GO:0003824;GO:0005488;GO:0008168;GO:0016740;GO:0016741		GO:0006139;GO:0006364;GO:0006396;GO:0006399;GO:0006807;GO:0008033;GO:0008152;GO:0009987;GO:0016070;GO:0034641;GO:0043170;GO:0044237;GO:0044238							AN0745.2	IPR000692;IPR029063	Fibrillarin;SAM-dependent_MTases	ko03008				PF01269										Emericella nidulans (strain FGSC A4 / ATCC 38163 / CBS 112.46 / NRRL 194 / M139)	Q5BFD5_EMENI			COG1889
C8VI69	+		catalytic activity;methyltransferase activity;O-methyltransferase activity;transferase activity;transferase activity, transferring one-carbon groups							Completeproteome;Referenceproteome			GO:0003824;GO:0008168;GO:0008171;GO:0016740;GO:0016741				CADANIAG00009825	CADANIAP00009825	CADANIAT00009825			ANIA_03236	IPR002935;IPR029063	O-MeTrfase_3;SAM-dependent_MTases								PS51682	SAM_OMT_I						Emericella nidulans (strain FGSC A4 / ATCC 38163 / CBS 112.46 / NRRL 194 / M139)	C8VI69_EMENI
Q5BDK4	+	lipid metabolic process;phospholipid metabolic process;metabolic process;cellular process;organophosphate metabolic process;cellular metabolic process;primary metabolic process;cellular lipid metabolic process	catalytic activity;methyltransferase activity;N-methyltransferase activity;oxidoreductase activity;oxidoreductase activity, acting on the CH-CH group of donors;transferase activity;transferase activity, transferring one-carbon groups	cytoplasm;integral to membrane;intrinsic to membrane;intracellular part;membrane part;cell part	lipid metabolic process;metabolic process;cellular process;cellular metabolic process;primary metabolic process;cellular lipid metabolic process	cytoplasm;cell part		PEMT				GO:0006629;GO:0006644;GO:0008152;GO:0009987;GO:0019637;GO:0044237;GO:0044238;GO:0044255	GO:0003824;GO:0008168;GO:0008170;GO:0016491;GO:0016627;GO:0016740;GO:0016741	GO:0005737;GO:0016021;GO:0031224;GO:0044424;GO:0044425;GO:0044464	GO:0006629;GO:0008152;GO:0009987;GO:0044237;GO:0044238;GO:0044255	GO:0005737;GO:0044464						AN1376.2	IPR001104;IPR024960;IPR007318	3-oxo-5_a-steroid_4-DH_C;PEMT/MFAP;Phopholipid_MeTrfase					PF04191			PS50244;PS51599	S5A_REDUCTASE;SAM_PEMT_PEM2						Emericella nidulans (strain FGSC A4 / ATCC 38163 / CBS 112.46 / NRRL 194 / M139)	Q5BDK4_EMENI			NOG261676
Q5B1P1;C8VG72	+		catalytic activity;methyltransferase activity;transferase activity;transferase activity, transferring one-carbon groups					FtsJ		Completeproteome;Referenceproteome			GO:0003824;GO:0008168;GO:0016740;GO:0016741				CADANIAG00003542	CADANIAP00003542	CADANIAT00003542				IPR002877;IPR029063	rRNA_MeTrfase_FtsJ_dom;SAM-dependent_MTases					PF01728										Emericella nidulans (strain FGSC A4 / ATCC 38163 / CBS 112.46 / NRRL 194 / M139)	Q5B1P1_EMENI			NOG258716
Q5B467;C8VB16	+		catalytic activity					Spermine_synth		Completeproteome;Referenceproteome			GO:0003824				CADANIAG00005770	CADANIAP00005770	CADANIAT00005770				IPR029063;IPR001045	SAM-dependent_MTases;Spermi_synthase					PF01564										Emericella nidulans (strain FGSC A4 / ATCC 38163 / CBS 112.46 / NRRL 194 / M139)	Q5B467_EMENI			NOG45877
Q5AZ78;C8V0N4	+		nucleotide binding;catalytic activity;binding;ATP binding;methyltransferase activity;O-methyltransferase activity;transferase activity;transferase activity, transferring one-carbon groups;purine nucleotide binding;adenyl nucleotide binding;ribonucleotide binding;purine ribonucleotide binding;adenyl ribonucleotide binding;purine ribonucleoside triphosphate binding;ion binding;cation binding;metal …				Steroid hormone biosynthesis;Tyrosine metabolism;Betalain biosynthesis	Methyltransf_3		Completeproteome;Referenceproteome			GO:0000166;GO:0003824;GO:0005488;GO:0005524;GO:0008168;GO:0008171;GO:0016740;GO:0016741;GO:0017076;GO:0030554;GO:0032553;GO:0032555;GO:0032559;GO:0035639;GO:0043167;GO:0043169;GO:0046872				CADANIAG00006577	CADANIAP00006577	CADANIAT00006577				IPR011761;IPR013816;IPR002935;IPR029063	ATP-grasp;ATP_grasp_subdomain_2;O-MeTrfase_3;SAM-dependent_MTases	ko00140;ko00350;ko00965				PF01596			PS50975;PS51682	ATP_GRASP;SAM_OMT_I						Emericella nidulans (strain FGSC A4 / ATCC 38163 / CBS 112.46 / NRRL 194 / M139)	Q5AZ78_EMENI			COG4122
Q5ARS5;C8VKZ6	+		catalytic activity;binding;zinc ion binding;oxidoreductase activity;transferase activity;ion binding;cation binding;metal ion binding;transition metal ion binding					Acyl_transf_1;ADH_zinc_N;ketoacyl-synt;Ketoacyl-synt_C;KR;Methyltransf_12;PS-DH		Completeproteome;Phosphoprotein;Referenceproteome;Transferase			GO:0003824;GO:0005488;GO:0008270;GO:0016491;GO:0016740;GO:0043167;GO:0043169;GO:0046872;GO:0046914				CADANIAG00007849	CADANIAP00007849	CADANIAT00007849				IPR001227;IPR009081;IPR014043;IPR016035;IPR013149;IPR011032;IPR018201;IPR014031;IPR014030;IPR016036;IPR013217;IPR016040;IPR020801;IPR020841;IPR020807;IPR020843;IPR013968;IPR029063;IPR016039;IPR016038	Ac_transferase_dom;Acyl_carrier_prot-like;Acyl_transferase;Acyl_Trfase/lysoPLipase;ADH_C;GroES-like;Ketoacyl_synth_AS;Ketoacyl_synth_C;Ketoacyl_synth_N;Malonyl_transacylase_ACP-bd;Methyltransf_12;NAD(P)-bd_dom;PKS_acyl_transferase;PKS_Beta-ketoAc_synthase_dom;PKS_dehydratase;PKS_ER;PKS_KR;SAM-dependent_MTases;Thiolase-like;Thiolase-like_subgr					PF00698;PF00107;PF00109;PF02801;PF08659;PF08242;PF14765			PS50075;PS00606	ACP_DOMAIN;B_KETOACYL_SYNTHASE				SM00827;SM00826;SM00829;SM00822;SM00825	PKS_AT;PKS_DH;PKS_ER;PKS_KR;PKS_KS	Emericella nidulans (strain FGSC A4 / ATCC 38163 / CBS 112.46 / NRRL 194 / M139)	Q5ARS5_EMENI			COG3321
C8VIM6	+	chromatin organization;regulation of transcription, DNA-dependent;protein modification process;protein methylation;one-carbon metabolic process;organelle organization;metabolic process;protein alkylation;regulation of biosynthetic process;cellular process;regulation of gene expression;regulation of macromolecule biosynthetic process;cellular component organization;chromatin modification;covalent …	catalytic activity;binding;methyltransferase activity;N-methyltransferase activity;protein methyltransferase activity;histone-arginine N-methyltransferase activity;S-adenosylmethionine-dependent methyltransferase activity;arginine N-methyltransferase activity;protein-arginine N-methyltransferase activity;transferase activity;transferase activity, transferring one-carbon groups;protein-arginine om…	cytosol;small ribosomal subunit;cytosolic small ribosomal subunit;ribonucleoprotein complex;macromolecular complex;organelle part;intracellular part;cytoplasmic part;intracellular organelle part;cell part	chromatin organization;protein modification process;one-carbon metabolic process;organelle organization;metabolic process;protein alkylation;cellular process;cellular component organization;chromatin modification;histone modification;peptidyl-amino acid modification;protein metabolic process;ribosome biogenesis;macromolecule metabolic process;macromolecule modification;cellular metabolic process;…	cytosol;small ribosomal subunit;ribonucleoprotein complex;macromolecular complex;cell part		Methyltransf_31		Completeproteome;Methyltransferase;Referenceproteome;S-adenosyl-L-methionine;Transferase		GO:0006325;GO:0006355;GO:0006464;GO:0006479;GO:0006730;GO:0006996;GO:0008152;GO:0008213;GO:0009889;GO:0009987;GO:0010468;GO:0010556;GO:0016043;GO:0016568;GO:0016569;GO:0016570;GO:0016571;GO:0018193;GO:0018195;GO:0018216;GO:0019219;GO:0019222;GO:0019538;GO:0019919;GO:0022613;GO:0031323;GO:0031326;GO:0032259;GO:0034969;GO:0035246;GO:0035247;GO:0042254;GO:0043170;GO:0043412;GO:0043414;GO:0044085;GO:…	GO:0003824;GO:0005488;GO:0008168;GO:0008170;GO:0008276;GO:0008469;GO:0008757;GO:0016273;GO:0016274;GO:0016740;GO:0016741;GO:0035242;GO:0042054;GO:0043021;GO:0043022	GO:0005829;GO:0015935;GO:0022627;GO:0030529;GO:0032991;GO:0044422;GO:0044424;GO:0044444;GO:0044446;GO:0044464	GO:0006325;GO:0006464;GO:0006730;GO:0006996;GO:0008152;GO:0008213;GO:0009987;GO:0016043;GO:0016568;GO:0016570;GO:0018193;GO:0019538;GO:0042254;GO:0043170;GO:0043412;GO:0044237;GO:0044238;GO:0044281;GO:0051276;GO:0065007	GO:0005829;GO:0015935;GO:0030529;GO:0032991;GO:0044464	CADANIAG00009982	CADANIAP00009982	CADANIAT00009982			ANIA_03096	IPR025799;IPR025714;IPR029063	Arg_MeTrfase;Methyltranfer_dom;SAM-dependent_MTases					PF13847			PS51678	SAM_MT_PRMT						Emericella nidulans (strain FGSC A4 / ATCC 38163 / CBS 112.46 / NRRL 194 / M139)	C8VIM6_EMENI
C8VD48	+	one-carbon metabolic process;metabolic process;cellular process;methylation;cellular metabolic process;small molecule metabolic process	catalytic activity;methyltransferase activity;S-adenosylmethionine-dependent methyltransferase activity;transferase activity;transferase activity, transferring one-carbon groups	nucleus;cytoplasm;cytosol;organelle;membrane-bounded organelle;intracellular organelle;intracellular membrane-bounded organelle;intracellular part;cytoplasmic part;cell part	one-carbon metabolic process;metabolic process;cellular process;cellular metabolic process;small molecule metabolic process	nucleus;cytoplasm;cytosol;organelle;intracellular organelle;intracellular membrane-bounded organelle;cell part		Methyltransf_31		Completeproteome;Referenceproteome		GO:0006730;GO:0008152;GO:0009987;GO:0032259;GO:0044237;GO:0044281	GO:0003824;GO:0008168;GO:0008757;GO:0016740;GO:0016741	GO:0005634;GO:0005737;GO:0005829;GO:0043226;GO:0043227;GO:0043229;GO:0043231;GO:0044424;GO:0044444;GO:0044464	GO:0006730;GO:0008152;GO:0009987;GO:0044237;GO:0044281	GO:0005634;GO:0005737;GO:0005829;GO:0043226;GO:0043229;GO:0043231;GO:0044464	CADANIAG00000280	CADANIAP00000280	CADANIAT00000280			ANIA_07175	IPR025714;IPR029063	Methyltranfer_dom;SAM-dependent_MTases					PF13847										Emericella nidulans (strain FGSC A4 / ATCC 38163 / CBS 112.46 / NRRL 194 / M139)	C8VD48_EMENI
C8V0A9	+	translational elongation;regulation of translation;translational readthrough;metabolic process;biosynthetic process;macromolecule biosynthetic process;regulation of biosynthetic process;cellular process;regulation of gene expression;regulation of macromolecule biosynthetic process;posttranscriptional regulation of gene expression;regulation of metabolic process;regulation of cellular metabolic pr…	nucleic acid binding;catalytic activity;binding;methyltransferase activity;S-adenosylmethionine-dependent methyltransferase activity;transferase activity;transferase activity, transferring one-carbon groups	cytoplasm;intracellular part;cell part	translational elongation;regulation of translation;metabolic process;biosynthetic process;cellular process;macromolecule metabolic process;cellular metabolic process;biological regulation	cytoplasm;cell part				Completeproteome;Referenceproteome		GO:0006414;GO:0006417;GO:0006451;GO:0008152;GO:0009058;GO:0009059;GO:0009889;GO:0009987;GO:0010468;GO:0010556;GO:0010608;GO:0019222;GO:0031323;GO:0031326;GO:0032268;GO:0034645;GO:0043170;GO:0044237;GO:0044249;GO:0044260;GO:0050789;GO:0050794;GO:0051246;GO:0060255;GO:0065007;GO:0080090;GO:2000112	GO:0003676;GO:0003824;GO:0005488;GO:0008168;GO:0008757;GO:0016740;GO:0016741	GO:0005737;GO:0044424;GO:0044464	GO:0006414;GO:0006417;GO:0008152;GO:0009058;GO:0009987;GO:0043170;GO:0044237;GO:0065007	GO:0005737;GO:0044464	CADANIAG00007252	CADANIAP00007252	CADANIAT00007252			ANIA_10829	IPR002052;IPR029063	DNA_methylase_N6_adenine_CS;SAM-dependent_MTases								PS00092	N6_MTASE						Emericella nidulans (strain FGSC A4 / ATCC 38163 / CBS 112.46 / NRRL 194 / M139)	C8V0A9_EMENI
C8VFV1	+	alcohol metabolic process;organic acid metabolic process;cellular aromatic compound metabolic process;metabolic process;catabolic process;catechol-containing compound metabolic process;cellular process;organic acid catabolic process;phenol-containing compound metabolic process;catechol-containing compound catabolic process;protocatechuate catabolic process;carboxylic acid metabolic process;monoca…	catalytic activity;oxaloacetate decarboxylase activity;lyase activity;carbon-carbon lyase activity;carboxy-lyase activity;oxo-acid-lyase activity;4-hydroxy-4-methyl-2-oxoglutarate aldolase activity		alcohol metabolic process;organic acid metabolic process;cellular aromatic compound metabolic process;metabolic process;catabolic process;cellular process;cellular ketone metabolic process;cellular metabolic process;small molecule metabolic process			Methyltransf_6		Completeproteome;Referenceproteome		GO:0006066;GO:0006082;GO:0006725;GO:0008152;GO:0009056;GO:0009712;GO:0009987;GO:0016054;GO:0018958;GO:0019614;GO:0019619;GO:0019752;GO:0032787;GO:0034311;GO:0034313;GO:0042180;GO:0042537;GO:0043436;GO:0044237;GO:0044248;GO:0044281;GO:0044282;GO:0046164;GO:0046278;GO:0046395;GO:0072329	GO:0003824;GO:0008948;GO:0016829;GO:0016830;GO:0016831;GO:0016833;GO:0047443		GO:0006066;GO:0006082;GO:0006725;GO:0008152;GO:0009056;GO:0009987;GO:0042180;GO:0044237;GO:0044281		CADANIAG00003423	CADANIAP00003423	CADANIAT00003423			ANIA_10700	IPR005493	RNase_E_inh/diMeMenaQ_MeTrfase					PF03737										Emericella nidulans (strain FGSC A4 / ATCC 38163 / CBS 112.46 / NRRL 194 / M139)	C8VFV1_EMENI
C8VBW6	+							Methyltransf_33		Completeproteome;Referenceproteome							CADANIAG00000735	CADANIAP00000735	CADANIAT00000735			ANIA_10974	IPR019257;IPR017804;IPR029063;IPR017805	MeTrfase_dom;MeTrfase_EgtD-like;SAM-dependent_MTases;SAM_MeTrfase_EsaF-type_put					PF10017										Emericella nidulans (strain FGSC A4 / ATCC 38163 / CBS 112.46 / NRRL 194 / M139)	C8VBW6_EMENI
Q5ATG8;C8VEB3	+	metabolic process;secondary metabolic process	catalytic activity;binding;amino acid binding;transferase activity;vitamin binding;phosphopantetheine binding;carboxylic acid binding;amine binding;modified amino acid binding		metabolic process;secondary metabolic process			Acyl_transf_1;AMP-binding;Condensation;ketoacyl-synt;Ketoacyl-synt_C;KR;Methyltransf_12;NAD_binding_4;PP-binding;PS-DH		Completeproteome;Phosphoprotein;Referenceproteome;Transferase		GO:0008152;GO:0019748	GO:0003824;GO:0005488;GO:0016597;GO:0016740;GO:0019842;GO:0031177;GO:0031406;GO:0043176;GO:0072341		GO:0008152;GO:0019748		CADANIAG00002886	CADANIAP00002886	CADANIAT00002886				IPR010071;IPR001227;IPR009081;IPR014043;IPR016035;IPR020845;IPR000873;IPR001242;IPR018201;IPR014031;IPR014030;IPR013120;IPR016036;IPR013217;IPR016040;IPR020801;IPR020841;IPR020807;IPR013968;IPR020806;IPR029063;IPR016039;IPR016038	AA_adenyl_domain;Ac_transferase_dom;Acyl_carrier_prot-like;Acyl_transferase;Acyl_Trfase/lysoPLipase;AMP-binding_CS;AMP-dep_Synth/Lig;Condensatn;Ketoacyl_synth_AS;Ketoacyl_synth_C;Ketoacyl_synth_N;Male_sterile_NAD-bd;Malonyl_transacylase_ACP-bd;Methyltransf_12;NAD(P)-bd_dom;PKS_acyl_transferase;PKS_Beta-ketoAc_synthase_dom;PKS_dehydratase;PKS_KR;PKS_PP-bd;SAM-dependent_MTases;Thiolase-like;Thiolas…					PF00698;PF00501;PF00668;PF00109;PF02801;PF08659;PF08242;PF07993;PF00550;PF14765			PS50075;PS00455;PS00606	ACP_DOMAIN;AMP_BINDING;B_KETOACYL_SYNTHASE				SM00827;SM00826;SM00822;SM00825;SM00823	PKS_AT;PKS_DH;PKS_KR;PKS_KS;PKS_PP	Emericella nidulans (strain FGSC A4 / ATCC 38163 / CBS 112.46 / NRRL 194 / M139)	Q5ATG8_EMENI			COG1020
Q5B0L6;C8UZT7	+						Glycerophospholipid metabolism	DUF3419		Completeproteome;Referenceproteome							CADANIAG00007119	CADANIAP00007119	CADANIAT00007119				IPR021829;IPR029063	DUF3419;SAM-dependent_MTases	ko00564				PF11899										Emericella nidulans (strain FGSC A4 / ATCC 38163 / CBS 112.46 / NRRL 194 / M139)	Q5B0L6_EMENI			COG5379
Q5AUG4;C8V681	+		catalytic activity;methyltransferase activity;RNA methyltransferase activity;tRNA methyltransferase activity;S-adenosylmethionine-dependent methyltransferase activity;tRNA (adenine) methyltransferase activity;tRNA (adenine-N1-)-methyltransferase activity;transferase activity;transferase activity, transferring one-carbon groups	nucleus;tRNA (m1A) methyltransferase complex;macromolecular complex;methyltransferase complex;organelle;membrane-bounded organelle;intracellular organelle;intracellular membrane-bounded organelle;protein complex;tRNA methyltransferase complex;intracellular part;cytoplasmic part;cell part		nucleus;macromolecular complex;organelle;intracellular organelle;intracellular membrane-bounded organelle;protein complex;tRNA methyltransferase complex;cell part		Gcd10p		Completeproteome;Referenceproteome			GO:0003824;GO:0008168;GO:0008173;GO:0008175;GO:0008757;GO:0016426;GO:0016429;GO:0016740;GO:0016741	GO:0005634;GO:0031515;GO:0032991;GO:0034708;GO:0043226;GO:0043227;GO:0043229;GO:0043231;GO:0043234;GO:0043527;GO:0044424;GO:0044444;GO:0044464		GO:0005634;GO:0032991;GO:0043226;GO:0043229;GO:0043231;GO:0043234;GO:0043527;GO:0044464	CADANIAG00004092	CADANIAP00004092	CADANIAT00004092				IPR017423	TRM6					PF04189										Emericella nidulans (strain FGSC A4 / ATCC 38163 / CBS 112.46 / NRRL 194 / M139)	Q5AUG4_EMENI			NOG254601
C8V028	+	organic acid metabolic process;cellular amino acid metabolic process;glycine metabolic process;L-serine metabolic process;cellular aromatic compound metabolic process;one-carbon metabolic process;coenzyme metabolic process;folic acid-containing compound metabolic process;nitrogen compound metabolic process;metabolic process;cellular amino acid biosynthetic process;biosynthetic process;serine fami…	catalytic activity;glycine hydroxymethyltransferase activity;binding;transferase activity;transferase activity, transferring one-carbon groups;hydroxymethyl-, formyl- and related transferase activity;vitamin binding;pyridoxal phosphate binding;cofactor binding;vitamin B6 binding	mitochondrion;organelle;membrane-bounded organelle;intracellular organelle;intracellular membrane-bounded organelle;intracellular part;cytoplasmic part;cell part	organic acid metabolic process;cellular amino acid metabolic process;cellular aromatic compound metabolic process;one-carbon metabolic process;nitrogen compound metabolic process;metabolic process;biosynthetic process;amine metabolic process;cellular process;cellular nitrogen compound metabolic process;cellular ketone metabolic process;cellular metabolic process;primary metabolic process;small mo…	mitochondrion;organelle;intracellular organelle;intracellular membrane-bounded organelle;cell part		SHMT		Completeproteome;One-carbonmetabolism;Pyridoxalphosphate;Referenceproteome;Transferase		GO:0006082;GO:0006520;GO:0006544;GO:0006563;GO:0006725;GO:0006730;GO:0006732;GO:0006760;GO:0006807;GO:0008152;GO:0008652;GO:0009058;GO:0009069;GO:0009070;GO:0009308;GO:0009309;GO:0009987;GO:0016053;GO:0019752;GO:0034641;GO:0035999;GO:0042180;GO:0042558;GO:0043436;GO:0044106;GO:0044237;GO:0044238;GO:0044249;GO:0044271;GO:0044281;GO:0044283;GO:0046394;GO:0046483;GO:0046653;GO:0051186	GO:0003824;GO:0004372;GO:0005488;GO:0016740;GO:0016741;GO:0016742;GO:0019842;GO:0030170;GO:0048037;GO:0070279	GO:0005739;GO:0043226;GO:0043227;GO:0043229;GO:0043231;GO:0044424;GO:0044444;GO:0044464	GO:0006082;GO:0006520;GO:0006725;GO:0006730;GO:0006807;GO:0008152;GO:0009058;GO:0009308;GO:0009987;GO:0034641;GO:0042180;GO:0044237;GO:0044238;GO:0044281;GO:0046483;GO:0051186	GO:0005739;GO:0043226;GO:0043229;GO:0043231;GO:0044464	CADANIAG00007210	CADANIAP00007210	CADANIAT00007210			ANIA_10745	IPR015424;IPR015421;IPR015422;IPR001085;IPR019798	PyrdxlP-dep_Trfase;PyrdxlP-dep_Trfase_major_sub1;PyrdxlP-dep_Trfase_major_sub2;Ser_HO-MeTrfase;Ser_HO-MeTrfase_PLP_BS					PF00464			PS00096	SHMT	Serine hydroxymethyltransferase					Emericella nidulans (strain FGSC A4 / ATCC 38163 / CBS 112.46 / NRRL 194 / M139)	C8V028_EMENI		2.1.2.1
C8VSU4	+	organic acid metabolic process;cellular amino acid metabolic process;glycine metabolic process;glycine catabolic process;one-carbon metabolic process;nitrogen compound metabolic process;metabolic process;catabolic process;cellular amino acid catabolic process;serine family amino acid metabolic process;serine family amino acid catabolic process;amine metabolic process;amine catabolic process;cellu…	catalytic activity;aminomethyltransferase activity;glycine dehydrogenase (decarboxylating) activity;methyltransferase activity;transaminase activity;oxidoreductase activity;oxidoreductase activity, acting on the CH-NH2 group of donors;oxidoreductase activity, acting on the CH-NH2 group of donors, disulfide as acceptor;transferase activity;transferase activity, transferring one-carbon groups;trans…		organic acid metabolic process;cellular amino acid metabolic process;one-carbon metabolic process;nitrogen compound metabolic process;metabolic process;catabolic process;amine metabolic process;cellular process;cellular nitrogen compound metabolic process;cellular ketone metabolic process;cellular metabolic process;primary metabolic process;small molecule metabolic process			GCV_T;GCV_T_C		Aminotransferase;Completeproteome;Referenceproteome;Transferase		GO:0006082;GO:0006520;GO:0006544;GO:0006546;GO:0006730;GO:0006807;GO:0008152;GO:0009056;GO:0009063;GO:0009069;GO:0009071;GO:0009308;GO:0009310;GO:0009987;GO:0016054;GO:0019752;GO:0034641;GO:0042180;GO:0043436;GO:0044106;GO:0044237;GO:0044238;GO:0044248;GO:0044281;GO:0044282;GO:0046395	GO:0003824;GO:0004047;GO:0004375;GO:0008168;GO:0008483;GO:0016491;GO:0016638;GO:0016642;GO:0016740;GO:0016741;GO:0016769		GO:0006082;GO:0006520;GO:0006730;GO:0006807;GO:0008152;GO:0009056;GO:0009308;GO:0009987;GO:0034641;GO:0042180;GO:0044237;GO:0044238;GO:0044281		CADANIAG00001427	CADANIAP00001427	CADANIAT00001427			ANIA_01198	IPR006223;IPR028896;IPR013977;IPR006222;IPR029043;IPR027266	GCS_T;GCST/DmdA;GCV_T_C;GCV_T_N;GcvT/YgfZ_C;TrmE/GcvT_dom1					PF01571;PF08669					Aminomethyltransferase					Emericella nidulans (strain FGSC A4 / ATCC 38163 / CBS 112.46 / NRRL 194 / M139)	C8VSU4_EMENI		2.1.2.10
C8V1Z0	+	one-carbon metabolic process;metabolic process;cellular process;regulation of anatomical structure morphogenesis;methylation;regulation of sexual sporulation;regulation of sporulation resulting in formation of a cellular spore;negative regulation of sporulation resulting in formation of a cellular spore;regulation of sporulation;negative regulation of sporulation;regulation of sexual sporulation …	catalytic activity;methyltransferase activity;S-adenosylmethionine-dependent methyltransferase activity;transferase activity;transferase activity, transferring one-carbon groups	cytoplasm;intracellular part;cell part	one-carbon metabolic process;metabolic process;cellular process;cellular metabolic process;small molecule metabolic process;biological regulation	cytoplasm;cell part				Completeproteome;Referenceproteome		GO:0006730;GO:0008152;GO:0009987;GO:0022603;GO:0032259;GO:0034306;GO:0042173;GO:0042174;GO:0043937;GO:0043939;GO:0043940;GO:0043942;GO:0044237;GO:0044281;GO:0045595;GO:0045596;GO:0048519;GO:0048523;GO:0050789;GO:0050793;GO:0050794;GO:0051093;GO:0065007;GO:2000241;GO:2000242	GO:0003824;GO:0008168;GO:0008757;GO:0016740;GO:0016741	GO:0005737;GO:0044424;GO:0044464	GO:0006730;GO:0008152;GO:0009987;GO:0044237;GO:0044281;GO:0065007	GO:0005737;GO:0044464	CADANIAG00007543	CADANIAP00007543	CADANIAT00007543			ANIA_06749	IPR029063	SAM-dependent_MTases															Emericella nidulans (strain FGSC A4 / ATCC 38163 / CBS 112.46 / NRRL 194 / M139)	C8V1Z0_EMENI
Q5AXB1	+		catalytic activity;methyltransferase activity;O-methyltransferase activity;oxidoreductase activity;transferase activity;transferase activity, transferring one-carbon groups					Methyltransf_2;Trp_halogenase		S-adenosyl-L-methionine			GO:0003824;GO:0008168;GO:0008171;GO:0016491;GO:0016740;GO:0016741									AN7069.2	IPR016461;IPR001077;IPR003042;IPR029063;IPR006905;IPR011991	O-MeTrfase_COMT;O_MeTrfase_2;Rng_hydrolase-like;SAM-dependent_MTases;Trp_halogenase;WHTH_DNA-bd_dom					PF00891;PF04820	PR00420	RNGMNOXGNASE	PS51683	SAM_OMT_II						Emericella nidulans (strain FGSC A4 / ATCC 38163 / CBS 112.46 / NRRL 194 / M139)	Q5AXB1_EMENI			COG0644
Q5BFB9;C8VQX2	+		catalytic activity;methyltransferase activity;O-methyltransferase activity;transferase activity;transferase activity, transferring one-carbon groups					Methyltransf_2		Completeproteome;Referenceproteome;S-adenosyl-L-methionine			GO:0003824;GO:0008168;GO:0008171;GO:0016740;GO:0016741				CADANIAG00001904	CADANIAP00001904	CADANIAT00001904				IPR016461;IPR001077;IPR029063;IPR011991	O-MeTrfase_COMT;O_MeTrfase_2;SAM-dependent_MTases;WHTH_DNA-bd_dom					PF00891			PS51683	SAM_OMT_II						Emericella nidulans (strain FGSC A4 / ATCC 38163 / CBS 112.46 / NRRL 194 / M139)	Q5BFB9_EMENI			NOG290432
Q5AUU7;C8V568	+	one-carbon metabolic process;metabolic process;cellular process;methylation;cellular metabolic process;small molecule metabolic process	catalytic activity;methyltransferase activity;S-adenosylmethionine-dependent methyltransferase activity;transferase activity;transferase activity, transferring one-carbon groups	cytoplasm;intracellular part;cell part	one-carbon metabolic process;metabolic process;cellular process;cellular metabolic process;small molecule metabolic process	cytoplasm;cell part				Completeproteome;Referenceproteome		GO:0006730;GO:0008152;GO:0009987;GO:0032259;GO:0044237;GO:0044281	GO:0003824;GO:0008168;GO:0008757;GO:0016740;GO:0016741	GO:0005737;GO:0044424;GO:0044464	GO:0006730;GO:0008152;GO:0009987;GO:0044237;GO:0044281	GO:0005737;GO:0044464	CADANIAG00003951	CADANIAP00003951	CADANIAT00003951				IPR029063	SAM-dependent_MTases															Emericella nidulans (strain FGSC A4 / ATCC 38163 / CBS 112.46 / NRRL 194 / M139)	Q5AUU7_EMENI			NOG127670
Q5AVR0	+							DinB_2;FGE-sulfatase;Methyltransf_33														AN7620.2	IPR016187;IPR024775;IPR019257;IPR029063;IPR017805;IPR005532	C-type_lectin_fold;DinB-like;MeTrfase_dom;SAM-dependent_MTases;SAM_MeTrfase_EsaF-type_put;SUMF_dom					PF12867;PF03781;PF10017										Emericella nidulans (strain FGSC A4 / ATCC 38163 / CBS 112.46 / NRRL 194 / M139)	Q5AVR0_EMENI			COG4301
C8V3V0	+		tRNA binding;nucleic acid binding;RNA binding;catalytic activity;binding;methyltransferase activity;RNA methyltransferase activity;tRNA methyltransferase activity;tRNA (guanine-N7-)-methyltransferase activity;S-adenosylmethionine-dependent methyltransferase activity;tRNA (guanine) methyltransferase activity;transferase activity;transferase activity, transferring one-carbon groups	nucleolus;macromolecular complex;methyltransferase complex;organelle;non-membrane-bounded organelle;intracellular organelle;intracellular non-membrane-bounded organelle;protein complex;tRNA methyltransferase complex;organelle part;intracellular part;nuclear part;cytoplasmic part;intracellular organelle part;cell part		nucleolus;macromolecular complex;organelle;intracellular organelle;intracellular non-membrane-bounded organelle;protein complex;tRNA methyltransferase complex;cell part		Methyltransf_4		Completeproteome;Methyltransferase;Nucleus;Referenceproteome;RNA-binding;S-adenosyl-L-methionine;Transferase;tRNA-binding;tRNAprocessing			GO:0000049;GO:0003676;GO:0003723;GO:0003824;GO:0005488;GO:0008168;GO:0008173;GO:0008175;GO:0008176;GO:0008757;GO:0016423;GO:0016740;GO:0016741	GO:0005730;GO:0032991;GO:0034708;GO:0043226;GO:0043228;GO:0043229;GO:0043232;GO:0043234;GO:0043527;GO:0044422;GO:0044424;GO:0044428;GO:0044444;GO:0044446;GO:0044464		GO:0005730;GO:0032991;GO:0043226;GO:0043229;GO:0043232;GO:0043234;GO:0043527;GO:0044464	CADANIAG00005075	CADANIAP00005075	CADANIAT00005075			TRM8	IPR029063;IPR025763;IPR003358	SAM-dependent_MTases;Trm8_euk;tRNA_(Gua-N-7)_MeTrfase_Trmb					PF02390			PS51625	SAM_MT_TRMB	tRNA (guanine-N(7)-)-methyltransferase					Emericella nidulans (strain FGSC A4 / ATCC 38163 / CBS 112.46 / NRRL 194 / M139)	C8V3V0_EMENI		2.1.1.33
Q5AR87	+																					AN9193.2	IPR029063	SAM-dependent_MTases															Emericella nidulans (strain FGSC A4 / ATCC 38163 / CBS 112.46 / NRRL 194 / M139)	Q5AR87_EMENI			NOG319369
C8VDM6	+	one-carbon metabolic process;metabolic process;cellular process;methylation;cellular metabolic process;small molecule metabolic process	catalytic activity;methyltransferase activity;S-adenosylmethionine-dependent methyltransferase activity;transferase activity;transferase activity, transferring one-carbon groups	cytoplasm;intracellular part;cell part	one-carbon metabolic process;metabolic process;cellular process;cellular metabolic process;small molecule metabolic process	cytoplasm;cell part				Completeproteome;Referenceproteome		GO:0006730;GO:0008152;GO:0009987;GO:0032259;GO:0044237;GO:0044281	GO:0003824;GO:0008168;GO:0008757;GO:0016740;GO:0016741	GO:0005737;GO:0044424;GO:0044464	GO:0006730;GO:0008152;GO:0009987;GO:0044237;GO:0044281	GO:0005737;GO:0044464	CADANIAG00000895	CADANIAP00000895	CADANIAT00000895			ANIA_07758	IPR029063	SAM-dependent_MTases															Emericella nidulans (strain FGSC A4 / ATCC 38163 / CBS 112.46 / NRRL 194 / M139)	C8VDM6_EMENI
Q5BE32	+	organic acid metabolic process;cellular amino acid metabolic process;glycine metabolic process;glycine catabolic process;nitrogen compound metabolic process;metabolic process;catabolic process;cellular amino acid catabolic process;serine family amino acid metabolic process;serine family amino acid catabolic process;amine metabolic process;amine catabolic process;cellular process;organic acid cata…	catalytic activity;aminomethyltransferase activity;methyltransferase activity;transaminase activity;transferase activity;transferase activity, transferring one-carbon groups;transferase activity, transferring nitrogenous groups		organic acid metabolic process;cellular amino acid metabolic process;nitrogen compound metabolic process;metabolic process;catabolic process;amine metabolic process;cellular process;cellular nitrogen compound metabolic process;cellular ketone metabolic process;cellular metabolic process;primary metabolic process;small molecule metabolic process		Glycine, serine and threonine metabolism;One carbon pool by folate;Nitrogen metabolism	GCV_T;GCV_T_C		Aminotransferase;Transferase		GO:0006082;GO:0006520;GO:0006544;GO:0006546;GO:0006807;GO:0008152;GO:0009056;GO:0009063;GO:0009069;GO:0009071;GO:0009308;GO:0009310;GO:0009987;GO:0016054;GO:0019752;GO:0034641;GO:0042180;GO:0043436;GO:0044106;GO:0044237;GO:0044238;GO:0044248;GO:0044281;GO:0044282;GO:0046395	GO:0003824;GO:0004047;GO:0008168;GO:0008483;GO:0016740;GO:0016741;GO:0016769		GO:0006082;GO:0006520;GO:0006807;GO:0008152;GO:0009056;GO:0009308;GO:0009987;GO:0034641;GO:0042180;GO:0044237;GO:0044238;GO:0044281							AN1198.2	IPR006223;IPR013977;IPR006222;IPR029043;IPR027266	GCS_T;GCV_T_C;GCV_T_N;GcvT/YgfZ_C;TrmE/GcvT_dom1	ko00260;ko00670;ko00910				PF01571;PF08669					Aminomethyltransferase					Emericella nidulans (strain FGSC A4 / ATCC 38163 / CBS 112.46 / NRRL 194 / M139)	Q5BE32_EMENI		2.1.2.10	COG0404
Q5BA73;C8VPU3	+							SET		Completeproteome;Referenceproteome							CADANIAG00009289	CADANIAP00009289	CADANIAT00009289				IPR029063;IPR001214	SAM-dependent_MTases;SET_dom					PF00856			PS50280	SET				SM00317	SET	Emericella nidulans (strain FGSC A4 / ATCC 38163 / CBS 112.46 / NRRL 194 / M139)	Q5BA73_EMENI			COG0500
Q5BCW6;C8VNB1	+	alcohol metabolic process;lipid metabolic process;steroid biosynthetic process;ergosterol biosynthetic process;one-carbon metabolic process;metabolic process;steroid metabolic process;ergosterol metabolic process;lipid biosynthetic process;biosynthetic process;cellular process;sterol metabolic process;sterol biosynthetic process;phytosteroid metabolic process;phytosteroid biosynthetic process;met…	catalytic activity;sterol 24-C-methyltransferase activity;methyltransferase activity;C-methyltransferase activity;S-adenosylmethionine-dependent methyltransferase activity;transferase activity;transferase activity, transferring one-carbon groups	cytoplasm;intracellular part;cell part	alcohol metabolic process;lipid metabolic process;one-carbon metabolic process;metabolic process;biosynthetic process;cellular process;cellular metabolic process;primary metabolic process;small molecule metabolic process	cytoplasm;cell part		Methyltransf_11		Completeproteome;Referenceproteome		GO:0006066;GO:0006629;GO:0006694;GO:0006696;GO:0006730;GO:0008152;GO:0008202;GO:0008204;GO:0008610;GO:0009058;GO:0009987;GO:0016125;GO:0016126;GO:0016128;GO:0016129;GO:0032259;GO:0044107;GO:0044108;GO:0044237;GO:0044238;GO:0044249;GO:0044281;GO:0044283;GO:0046165	GO:0003824;GO:0003838;GO:0008168;GO:0008169;GO:0008757;GO:0016740;GO:0016741	GO:0005737;GO:0044424;GO:0044464	GO:0006066;GO:0006629;GO:0006730;GO:0008152;GO:0009058;GO:0009987;GO:0044237;GO:0044238;GO:0044281	GO:0005737;GO:0044464	CADANIAG00008251	CADANIAP00008251	CADANIAT00008251				IPR013216;IPR029063	Methyltransf_11;SAM-dependent_MTases					PF08241										Emericella nidulans (strain FGSC A4 / ATCC 38163 / CBS 112.46 / NRRL 194 / M139)	Q5BCW6_EMENI			COG0500
Q5B4B7;C8V7S5	+	translation;metabolic process;biosynthetic process;macromolecule biosynthetic process;cellular process;protein metabolic process;cellular macromolecule biosynthetic process;macromolecule metabolic process;cellular metabolic process;primary metabolic process;cellular biosynthetic process;cellular macromolecule metabolic process;cellular protein metabolic process	structural constituent of ribosome;catalytic activity;structural molecule activity;methyltransferase activity;transferase activity;transferase activity, transferring one-carbon groups	organellar small ribosomal subunit;mitochondrial small ribosomal subunit;small ribosomal subunit;ribonucleoprotein complex;macromolecular complex;organelle part;intracellular part;mitochondrial part;cytoplasmic part;intracellular organelle part;cell part	translation;metabolic process;biosynthetic process;cellular process;protein metabolic process;macromolecule metabolic process;cellular metabolic process;primary metabolic process	small ribosomal subunit;ribonucleoprotein complex;macromolecular complex;cell part		Rsm22		Completeproteome;Referenceproteome		GO:0006412;GO:0008152;GO:0009058;GO:0009059;GO:0009987;GO:0019538;GO:0034645;GO:0043170;GO:0044237;GO:0044238;GO:0044249;GO:0044260;GO:0044267	GO:0003735;GO:0003824;GO:0005198;GO:0008168;GO:0016740;GO:0016741	GO:0000314;GO:0005763;GO:0015935;GO:0030529;GO:0032991;GO:0044422;GO:0044424;GO:0044429;GO:0044444;GO:0044446;GO:0044464	GO:0006412;GO:0008152;GO:0009058;GO:0009987;GO:0019538;GO:0043170;GO:0044237;GO:0044238	GO:0015935;GO:0030529;GO:0032991;GO:0044464	CADANIAG00005822	CADANIAP00005822	CADANIAT00005822				IPR015324;IPR029063	Ribosomal_Rsm22_bac-type;SAM-dependent_MTases					PF09243										Emericella nidulans (strain FGSC A4 / ATCC 38163 / CBS 112.46 / NRRL 194 / M139)	Q5B4B7_EMENI			COG5459
C8VH48	+	protein modification process;protein methylation;one-carbon metabolic process;metabolic process;protein alkylation;cellular process;peptidyl-lysine methylation;peptidyl-lysine trimethylation;peptidyl-amino acid modification;peptidyl-lysine modification;protein metabolic process;methylation;macromolecule metabolic process;macromolecule modification;macromolecule methylation;cellular metabolic proc…	catalytic activity;methyltransferase activity;N-methyltransferase activity;protein methyltransferase activity;S-adenosylmethionine-dependent methyltransferase activity;lysine N-methyltransferase activity;protein-lysine N-methyltransferase activity;transferase activity;transferase activity, transferring one-carbon groups		protein modification process;one-carbon metabolic process;metabolic process;protein alkylation;cellular process;peptidyl-amino acid modification;protein metabolic process;macromolecule metabolic process;macromolecule modification;cellular metabolic process;primary metabolic process;small molecule metabolic process			Methyltransf_16		Completeproteome;Referenceproteome		GO:0006464;GO:0006479;GO:0006730;GO:0008152;GO:0008213;GO:0009987;GO:0018022;GO:0018023;GO:0018193;GO:0018205;GO:0019538;GO:0032259;GO:0043170;GO:0043412;GO:0043414;GO:0044237;GO:0044238;GO:0044260;GO:0044267;GO:0044281	GO:0003824;GO:0008168;GO:0008170;GO:0008276;GO:0008757;GO:0016278;GO:0016279;GO:0016740;GO:0016741		GO:0006464;GO:0006730;GO:0008152;GO:0008213;GO:0009987;GO:0018193;GO:0019538;GO:0043170;GO:0043412;GO:0044237;GO:0044238;GO:0044281		CADANIAG00009516	CADANIAP00009516	CADANIAT00009516			ANIA_09098	IPR019410;IPR029063	Nicotinamide_N-MeTfrase-like;SAM-dependent_MTases					PF10294										Emericella nidulans (strain FGSC A4 / ATCC 38163 / CBS 112.46 / NRRL 194 / M139)	C8VH48_EMENI
C8V996	+			cytoplasm;intracellular part;cell part		cytoplasm;cell part		Methyltransf_16		Completeproteome;Referenceproteome				GO:0005737;GO:0044424;GO:0044464		GO:0005737;GO:0044464	CADANIAG00006167	CADANIAP00006167	CADANIAT00006167			ANIA_10539	IPR019410;IPR029063	Nicotinamide_N-MeTfrase-like;SAM-dependent_MTases					PF10294										Emericella nidulans (strain FGSC A4 / ATCC 38163 / CBS 112.46 / NRRL 194 / M139)	C8V996_EMENI
C8VBA0	+		catalytic activity;methyltransferase activity;O-methyltransferase activity;RNA methyltransferase activity;rRNA methyltransferase activity;rRNA (uridine-2'-O-)-methyltransferase activity;S-adenosylmethionine-dependent methyltransferase activity;rRNA (uridine) methyltransferase activity;transferase activity;transferase activity, transferring one-carbon groups	mitochondrion;organelle;membrane-bounded organelle;intracellular organelle;intracellular membrane-bounded organelle;intracellular part;cytoplasmic part;cell part		mitochondrion;organelle;intracellular organelle;intracellular membrane-bounded organelle;cell part		FtsJ		Completeproteome;Referenceproteome			GO:0003824;GO:0008168;GO:0008171;GO:0008173;GO:0008649;GO:0008650;GO:0008757;GO:0016436;GO:0016740;GO:0016741	GO:0005739;GO:0043226;GO:0043227;GO:0043229;GO:0043231;GO:0044424;GO:0044444;GO:0044464		GO:0005739;GO:0043226;GO:0043229;GO:0043231;GO:0044464	CADANIAG00000517	CADANIAP00000517	CADANIAT00000517			ANIA_10940	IPR015507;IPR002877;IPR029063	rRNA-MeTfrase_E;rRNA_MeTrfase_FtsJ_dom;SAM-dependent_MTases					PF01728										Emericella nidulans (strain FGSC A4 / ATCC 38163 / CBS 112.46 / NRRL 194 / M139)	C8VBA0_EMENI
C8VB33	+		catalytic activity;methyltransferase activity;O-methyltransferase activity;transferase activity;transferase activity, transferring one-carbon groups					Methyltransf_2		Completeproteome;Referenceproteome;S-adenosyl-L-methionine			GO:0003824;GO:0008168;GO:0008171;GO:0016740;GO:0016741				CADANIAG00000401	CADANIAP00000401	CADANIAT00000401			ANIA_10889	IPR016461;IPR001077;IPR029063;IPR011991	O-MeTrfase_COMT;O_MeTrfase_2;SAM-dependent_MTases;WHTH_DNA-bd_dom					PF00891			PS51683	SAM_OMT_II						Emericella nidulans (strain FGSC A4 / ATCC 38163 / CBS 112.46 / NRRL 194 / M139)	C8VB33_EMENI
Q5B817;C8VHY7	+	maturation of SSU-rRNA from tricistronic rRNA transcript (SSU-rRNA, 5.8S rRNA, LSU-rRNA);nucleobase-containing compound metabolic process;rRNA processing;RNA processing;nitrogen compound metabolic process;metabolic process;cellular process;RNA metabolic process;rRNA metabolic process;maturation of SSU-rRNA;ncRNA processing;cellular nitrogen compound metabolic process;ncRNA metabolic process;macro…	rRNA (adenine-N6,N6-)-dimethyltransferase activity;catalytic activity;methyltransferase activity;N-methyltransferase activity;RNA methyltransferase activity;rRNA methyltransferase activity;S-adenosylmethionine-dependent methyltransferase activity;rRNA (adenine) methyltransferase activity;transferase activity;transferase activity, transferring one-carbon groups	nucleus;spindle;ribonucleoprotein complex;preribosome;90S preribosome;macromolecular complex;organelle;membrane-bounded organelle;non-membrane-bounded organelle;intracellular organelle;intracellular membrane-bounded organelle;intracellular non-membrane-bounded organelle;organelle part;intracellular part;cytoskeletal part;intracellular organelle part;cell part;mitotic spindle	nucleobase-containing compound metabolic process;rRNA processing;RNA processing;nitrogen compound metabolic process;metabolic process;cellular process;RNA metabolic process;cellular nitrogen compound metabolic process;macromolecule metabolic process;cellular metabolic process;primary metabolic process	nucleus;ribonucleoprotein complex;preribosome;macromolecular complex;organelle;intracellular organelle;intracellular membrane-bounded organelle;intracellular non-membrane-bounded organelle;cell part		RrnaAD		Completeproteome;Referenceproteome		GO:0000462;GO:0006139;GO:0006364;GO:0006396;GO:0006807;GO:0008152;GO:0009987;GO:0016070;GO:0016072;GO:0030490;GO:0034470;GO:0034641;GO:0034660;GO:0043170;GO:0044237;GO:0044238;GO:0044260;GO:0090304	GO:0000179;GO:0003824;GO:0008168;GO:0008170;GO:0008173;GO:0008649;GO:0008757;GO:0016433;GO:0016740;GO:0016741	GO:0005634;GO:0005819;GO:0030529;GO:0030684;GO:0030686;GO:0032991;GO:0043226;GO:0043227;GO:0043228;GO:0043229;GO:0043231;GO:0043232;GO:0044422;GO:0044424;GO:0044430;GO:0044446;GO:0044464;GO:0072686	GO:0006139;GO:0006364;GO:0006396;GO:0006807;GO:0008152;GO:0009987;GO:0016070;GO:0034641;GO:0043170;GO:0044237;GO:0044238	GO:0005634;GO:0030529;GO:0030684;GO:0032991;GO:0043226;GO:0043229;GO:0043231;GO:0043232;GO:0044464	CADANIAG00009744	CADANIAP00009744	CADANIAT00009744				IPR001737;IPR020596;IPR020598;IPR011530;IPR029063	KsgA/Erm;rRNA_Ade_Mease_Trfase_CS;rRNA_Ade_methylase_Trfase_N;rRNA_adenine_dimethylase;SAM-dependent_MTases					PF00398			PS01131;PS51689	RRNA_A_DIMETH;SAM_RNA_A_N6_MT				SM00650	rADc	Emericella nidulans (strain FGSC A4 / ATCC 38163 / CBS 112.46 / NRRL 194 / M139)	Q5B817_EMENI			COG0030
Q5AVC2	+																					AN7758.2	IPR029063	SAM-dependent_MTases															Emericella nidulans (strain FGSC A4 / ATCC 38163 / CBS 112.46 / NRRL 194 / M139)	Q5AVC2_EMENI			NOG324502
Q5AXN5;C8V379	+		catalytic activity;methyltransferase activity;O-methyltransferase activity;transferase activity;transferase activity, transferring one-carbon groups					Methyltransf_2		Completeproteome;Referenceproteome;S-adenosyl-L-methionine			GO:0003824;GO:0008168;GO:0008171;GO:0016740;GO:0016741				CADANIAG00007757	CADANIAP00007757	CADANIAT00007757				IPR016461;IPR001077;IPR029063;IPR011991	O-MeTrfase_COMT;O_MeTrfase_2;SAM-dependent_MTases;WHTH_DNA-bd_dom					PF00891			PS51683	SAM_OMT_II						Emericella nidulans (strain FGSC A4 / ATCC 38163 / CBS 112.46 / NRRL 194 / M139)	Q5AXN5_EMENI			NOG270982
Q5BEJ6;C8VTX9	+		catalytic activity;transferase activity					Acyl_transf_1;ketoacyl-synt;Ketoacyl-synt_C;Methyltransf_12;NAD_binding_4;PP-binding		Completeproteome;Phosphopantetheine;Referenceproteome;Transferase			GO:0003824;GO:0016740				CADANIAG00001613	CADANIAP00001613	CADANIAT00001613				IPR001227;IPR009081;IPR014043;IPR016035;IPR018201;IPR014031;IPR014030;IPR013120;IPR016036;IPR013217;IPR016040;IPR020801;IPR006162;IPR029063;IPR016039;IPR016038	Ac_transferase_dom;Acyl_carrier_prot-like;Acyl_transferase;Acyl_Trfase/lysoPLipase;Ketoacyl_synth_AS;Ketoacyl_synth_C;Ketoacyl_synth_N;Male_sterile_NAD-bd;Malonyl_transacylase_ACP-bd;Methyltransf_12;NAD(P)-bd_dom;PKS_acyl_transferase;Ppantetheine_attach_site;SAM-dependent_MTases;Thiolase-like;Thiolase-like_subgr					PF00698;PF00109;PF02801;PF08242;PF07993;PF00550			PS50075;PS00606;PS00012	ACP_DOMAIN;B_KETOACYL_SYNTHASE;PHOSPHOPANTETHEINE				SM00827	PKS_AT	Emericella nidulans (strain FGSC A4 / ATCC 38163 / CBS 112.46 / NRRL 194 / M139)	Q5BEJ6_EMENI			COG3320
Q5B7L6;C8VHA1	+		catalytic activity;protein-L-isoaspartate (D-aspartate) O-methyltransferase activity;methyltransferase activity;O-methyltransferase activity;protein methyltransferase activity;S-adenosylmethionine-dependent methyltransferase activity;carboxyl-O-methyltransferase activity;transferase activity;transferase activity, transferring one-carbon groups;protein carboxyl O-methyltransferase activity	nucleus;cytosol;organelle;membrane-bounded organelle;intracellular organelle;intracellular membrane-bounded organelle;intracellular part;cytoplasmic part;cell part		nucleus;cytosol;organelle;intracellular organelle;intracellular membrane-bounded organelle;cell part		PCMT		Completeproteome;Methyltransferase;Referenceproteome;S-adenosyl-L-methionine;Transferase			GO:0003824;GO:0004719;GO:0008168;GO:0008171;GO:0008276;GO:0008757;GO:0010340;GO:0016740;GO:0016741;GO:0051998	GO:0005634;GO:0005829;GO:0043226;GO:0043227;GO:0043229;GO:0043231;GO:0044424;GO:0044444;GO:0044464		GO:0005634;GO:0005829;GO:0043226;GO:0043229;GO:0043231;GO:0044464	CADANIAG00009569	CADANIAP00009569	CADANIAT00009569				IPR000682;IPR029063	PCMT;SAM-dependent_MTases					PF01135			PS01279	PCMT	Protein-L-isoaspartate O-methyltransferase					Emericella nidulans (strain FGSC A4 / ATCC 38163 / CBS 112.46 / NRRL 194 / M139)	Q5B7L6_EMENI		2.1.1.77	COG2518
C8VQ78	+	DNA catabolic process, endonucleolytic;DNA catabolic process, exonucleolytic;nucleobase-containing compound metabolic process;DNA metabolic process;DNA repair;double-strand break repair;DNA catabolic process;RNA processing;nitrogen compound metabolic process;response to stress;response to DNA damage stimulus;metabolic process;catabolic process;macromolecule catabolic process;cellular process;RNA …	single-stranded DNA specific endodeoxyribonuclease activity;catalytic activity;nuclease activity;endonuclease activity;endodeoxyribonuclease activity;exonuclease activity;exodeoxyribonuclease activity;deoxyribonuclease activity;methyltransferase activity;RNA methyltransferase activity;tRNA methyltransferase activity;double-stranded DNA specific exodeoxyribonuclease activity;5'-3' exonuclease acti…	nucleus;mitochondrion;organelle;membrane-bounded organelle;intracellular organelle;intracellular membrane-bounded organelle;intracellular part;cytoplasmic part;cell part	nucleobase-containing compound metabolic process;DNA metabolic process;DNA repair;RNA processing;nitrogen compound metabolic process;response to stress;response to DNA damage stimulus;metabolic process;catabolic process;cellular process;RNA metabolic process;cellular nitrogen compound metabolic process;macromolecule metabolic process;cellular metabolic process;primary metabolic process;response t…	nucleus;mitochondrion;organelle;intracellular organelle;intracellular membrane-bounded organelle;cell part		tRNA_U5-meth_tr		Completeproteome;Referenceproteome		GO:0000737;GO:0000738;GO:0006139;GO:0006259;GO:0006281;GO:0006302;GO:0006308;GO:0006396;GO:0006807;GO:0006950;GO:0006974;GO:0008152;GO:0009056;GO:0009057;GO:0009987;GO:0016070;GO:0033554;GO:0034641;GO:0043170;GO:0044237;GO:0044238;GO:0044248;GO:0044260;GO:0044265;GO:0050896;GO:0051716;GO:0090304	GO:0000014;GO:0003824;GO:0004518;GO:0004519;GO:0004520;GO:0004527;GO:0004529;GO:0004536;GO:0008168;GO:0008173;GO:0008175;GO:0008309;GO:0008409;GO:0008757;GO:0016300;GO:0016740;GO:0016741;GO:0016787;GO:0016788;GO:0016796;GO:0016895;GO:0030696;GO:0030697;GO:0035312;GO:0051908	GO:0005634;GO:0005739;GO:0043226;GO:0043227;GO:0043229;GO:0043231;GO:0044424;GO:0044444;GO:0044464	GO:0006139;GO:0006259;GO:0006281;GO:0006396;GO:0006807;GO:0006950;GO:0006974;GO:0008152;GO:0009056;GO:0009987;GO:0016070;GO:0034641;GO:0043170;GO:0044237;GO:0044238;GO:0050896	GO:0005634;GO:0005739;GO:0043226;GO:0043229;GO:0043231;GO:0044464	CADANIAG00002605	CADANIAP00002605	CADANIAT00002605			ANIA_00141	IPR030390;IPR030391;IPR012340;IPR029063;IPR025795;IPR010280	MeTrfase_TrmA_AS;MeTrfase_TrmA_CS;NA-bd_OB-fold;SAM-dependent_MTases;tRNA_(uracil-5-)_MeTrfase;U5_MeTrfase_fam					PF05958			PS51687;PS51622;PS01230;PS01231	SAM_MT_RNA_M5U;SAM_MT_RNA_M5U_2;TRMA_1;TRMA_2						Emericella nidulans (strain FGSC A4 / ATCC 38163 / CBS 112.46 / NRRL 194 / M139)	C8VQ78_EMENI
C8VRV0	+	sporocarp development involved in sexual reproduction;developmental process involved in reproduction;alcohol metabolic process;cellular biogenic amine metabolic process;lipid metabolic process;phospholipid metabolic process;glycerophospholipid metabolic process;phosphatidylcholine biosynthetic process;nitrogen compound metabolic process;metabolic process;lipid biosynthetic process;phospholipid bi…	phosphatidyl-N-methylethanolamine N-methyltransferase activity;catalytic activity;methyltransferase activity;N-methyltransferase activity;S-adenosylmethionine-dependent methyltransferase activity;oxidoreductase activity;oxidoreductase activity, acting on the CH-CH group of donors;transferase activity;transferase activity, transferring one-carbon groups;phosphatidyl-N-dimethylethanolamine N-methyl…	mitochondrion;endoplasmic reticulum;integral to membrane;intrinsic to membrane;organelle;membrane-bounded organelle;intracellular organelle;intracellular membrane-bounded organelle;intracellular part;membrane part;cytoplasmic part;cell part	alcohol metabolic process;lipid metabolic process;nitrogen compound metabolic process;metabolic process;biosynthetic process;amine metabolic process;cellular process;developmental process;cellular nitrogen compound metabolic process;cellular metabolic process;primary metabolic process;cellular lipid metabolic process;small molecule metabolic process;anatomical structure development	mitochondrion;endoplasmic reticulum;organelle;intracellular organelle;intracellular membrane-bounded organelle;cell part		PEMT		Completeproteome;Referenceproteome		GO:0000909;GO:0003006;GO:0006066;GO:0006576;GO:0006629;GO:0006644;GO:0006650;GO:0006656;GO:0006807;GO:0008152;GO:0008610;GO:0008654;GO:0009058;GO:0009308;GO:0009987;GO:0019637;GO:0022414;GO:0030582;GO:0030584;GO:0032502;GO:0034641;GO:0042439;GO:0044106;GO:0044237;GO:0044238;GO:0044249;GO:0044255;GO:0044281;GO:0045017;GO:0046470;GO:0046474;GO:0046486;GO:0048513;GO:0048608;GO:0048856;GO:0070791;GO:…	GO:0000773;GO:0003824;GO:0008168;GO:0008170;GO:0008757;GO:0016491;GO:0016627;GO:0016740;GO:0016741;GO:0080101	GO:0005739;GO:0005783;GO:0016021;GO:0031224;GO:0043226;GO:0043227;GO:0043229;GO:0043231;GO:0044424;GO:0044425;GO:0044444;GO:0044464	GO:0006066;GO:0006629;GO:0006807;GO:0008152;GO:0009058;GO:0009308;GO:0009987;GO:0032502;GO:0034641;GO:0044237;GO:0044238;GO:0044255;GO:0044281;GO:0048856	GO:0005739;GO:0005783;GO:0043226;GO:0043229;GO:0043231;GO:0044464	CADANIAG00001232	CADANIAP00001232	CADANIAT00001232			ANIA_01376	IPR001104;IPR024960;IPR007318	3-oxo-5_a-steroid_4-DH_C;PEMT/MFAP;Phopholipid_MeTrfase					PF04191			PS50244;PS51599	S5A_REDUCTASE;SAM_PEMT_PEM2						Emericella nidulans (strain FGSC A4 / ATCC 38163 / CBS 112.46 / NRRL 194 / M139)	C8VRV0_EMENI
C8VN06	+		catalytic activity;methyltransferase activity;transferase activity;transferase activity, transferring one-carbon groups	nucleus;cytosol;organelle;membrane-bounded organelle;intracellular organelle;intracellular membrane-bounded organelle;intracellular part;cytoplasmic part;cell part		nucleus;cytosol;organelle;intracellular organelle;intracellular membrane-bounded organelle;cell part		Methyltransf_11		Completeproteome;Referenceproteome			GO:0003824;GO:0008168;GO:0016740;GO:0016741	GO:0005634;GO:0005829;GO:0043226;GO:0043227;GO:0043229;GO:0043231;GO:0044424;GO:0044444;GO:0044464		GO:0005634;GO:0005829;GO:0043226;GO:0043229;GO:0043231;GO:0044464	CADANIAG00008196	CADANIAP00008196	CADANIAT00008196			ANIA_01566	IPR013216;IPR029063	Methyltransf_11;SAM-dependent_MTases					PF08241										Emericella nidulans (strain FGSC A4 / ATCC 38163 / CBS 112.46 / NRRL 194 / M139)	C8VN06_EMENI
C8VP53	+	RNA methylation;tRNA nucleoside ribose methylation;cytoplasmic translation;nucleobase-containing compound metabolic process;RNA processing;tRNA metabolic process;tRNA modification;translation;one-carbon metabolic process;nitrogen compound metabolic process;tRNA processing;metabolic process;biosynthetic process;macromolecule biosynthetic process;RNA modification;cellular process;RNA metabolic proc…	catalytic activity;methyltransferase activity;RNA methyltransferase activity;tRNA methyltransferase activity;transferase activity;transferase activity, transferring one-carbon groups	nucleus;cytosol;organelle;membrane-bounded organelle;intracellular organelle;intracellular membrane-bounded organelle;intracellular part;cytoplasmic part;cell part	cytoplasmic translation;nucleobase-containing compound metabolic process;RNA processing;tRNA metabolic process;translation;one-carbon metabolic process;nitrogen compound metabolic process;tRNA processing;metabolic process;biosynthetic process;RNA modification;cellular process;RNA metabolic process;protein metabolic process;cellular nitrogen compound metabolic process;macromolecule metabolic proce…	nucleus;cytosol;organelle;intracellular organelle;intracellular membrane-bounded organelle;cell part		FtsJ		Completeproteome;Cytoplasm;Methyltransferase;Referenceproteome;S-adenosyl-L-methionine;Transferase;tRNAprocessing		GO:0001510;GO:0002128;GO:0002181;GO:0006139;GO:0006396;GO:0006399;GO:0006400;GO:0006412;GO:0006730;GO:0006807;GO:0008033;GO:0008152;GO:0009058;GO:0009059;GO:0009451;GO:0009987;GO:0016070;GO:0019538;GO:0030488;GO:0032259;GO:0034470;GO:0034641;GO:0034645;GO:0034660;GO:0043170;GO:0043412;GO:0043414;GO:0044237;GO:0044238;GO:0044249;GO:0044260;GO:0044267;GO:0044281;GO:0090304	GO:0003824;GO:0008168;GO:0008173;GO:0008175;GO:0016740;GO:0016741	GO:0005634;GO:0005829;GO:0043226;GO:0043227;GO:0043229;GO:0043231;GO:0044424;GO:0044444;GO:0044464	GO:0002181;GO:0006139;GO:0006396;GO:0006399;GO:0006412;GO:0006730;GO:0006807;GO:0008033;GO:0008152;GO:0009058;GO:0009451;GO:0009987;GO:0016070;GO:0019538;GO:0034641;GO:0043170;GO:0043412;GO:0044237;GO:0044238;GO:0044281	GO:0005634;GO:0005829;GO:0043226;GO:0043229;GO:0043231;GO:0044464	CADANIAG00008397	CADANIAP00008397	CADANIAT00008397			ANIA_01751	IPR028590;IPR015507;IPR002877;IPR029063	RNA_methyltr_E_Trm7;rRNA-MeTfrase_E;rRNA_MeTrfase_FtsJ_dom;SAM-dependent_MTases					PF01728					Putative tRNA (cytidine(32)/guanosine(34)-2'-O)-methyltransferase					Emericella nidulans (strain FGSC A4 / ATCC 38163 / CBS 112.46 / NRRL 194 / M139)	C8VP53_EMENI		2.1.1.205
Q5AWA3	+	RNA methylation;nucleobase-containing compound metabolic process;one-carbon metabolic process;nitrogen compound metabolic process;metabolic process;RNA modification;cellular process;RNA metabolic process;methylation;cellular nitrogen compound metabolic process;macromolecule metabolic process;macromolecule modification;macromolecule methylation;cellular metabolic process;primary metabolic process;…	catalytic activity;methyltransferase activity;transferase activity;transferase activity, transferring one-carbon groups		nucleobase-containing compound metabolic process;one-carbon metabolic process;nitrogen compound metabolic process;metabolic process;RNA modification;cellular process;RNA metabolic process;cellular nitrogen compound metabolic process;macromolecule metabolic process;macromolecule modification;cellular metabolic process;primary metabolic process;small molecule metabolic process			FtsJ				GO:0001510;GO:0006139;GO:0006730;GO:0006807;GO:0008152;GO:0009451;GO:0009987;GO:0016070;GO:0032259;GO:0034641;GO:0043170;GO:0043412;GO:0043414;GO:0044237;GO:0044238;GO:0044260;GO:0044281;GO:0090304	GO:0003824;GO:0008168;GO:0016740;GO:0016741		GO:0006139;GO:0006730;GO:0006807;GO:0008152;GO:0009451;GO:0009987;GO:0016070;GO:0034641;GO:0043170;GO:0043412;GO:0044237;GO:0044238;GO:0044281							AN7427.2	IPR015507;IPR002877;IPR029063	rRNA-MeTfrase_E;rRNA_MeTrfase_FtsJ_dom;SAM-dependent_MTases					PF01728										Emericella nidulans (strain FGSC A4 / ATCC 38163 / CBS 112.46 / NRRL 194 / M139)	Q5AWA3_EMENI			NOG151144
Q5BH50;C8VQJ3	+	RNA methylation;nucleobase-containing compound metabolic process;RNA processing;tRNA metabolic process;tRNA modification;one-carbon metabolic process;nitrogen compound metabolic process;tRNA processing;metabolic process;guanosine metabolic process;nucleoside metabolic process;ribonucleoside metabolic process;RNA modification;cellular process;RNA metabolic process;tRNA methylation;wybutosine metab…	catalytic activity;methyltransferase activity;S-adenosylmethionine-dependent methyltransferase activity;transferase activity;transferase activity, transferring one-carbon groups;transferase activity, transferring alkyl or aryl (other than methyl) groups	nucleus;cytosol;organelle;membrane-bounded organelle;intracellular organelle;intracellular membrane-bounded organelle;intracellular part;cytoplasmic part;cell part	nucleobase-containing compound metabolic process;RNA processing;tRNA metabolic process;one-carbon metabolic process;nitrogen compound metabolic process;tRNA processing;metabolic process;nucleoside metabolic process;RNA modification;cellular process;RNA metabolic process;cellular nitrogen compound metabolic process;macromolecule metabolic process;macromolecule modification;cellular metabolic proce…	nucleus;cytosol;organelle;intracellular organelle;intracellular membrane-bounded organelle;cell part				Completeproteome;Cytoplasm;Referenceproteome;S-adenosyl-L-methionine;Transferase;tRNAprocessing		GO:0001510;GO:0006139;GO:0006396;GO:0006399;GO:0006400;GO:0006730;GO:0006807;GO:0008033;GO:0008152;GO:0008617;GO:0009116;GO:0009119;GO:0009451;GO:0009987;GO:0016070;GO:0030488;GO:0031590;GO:0031591;GO:0032259;GO:0034470;GO:0034641;GO:0034660;GO:0042278;GO:0043170;GO:0043412;GO:0043414;GO:0044237;GO:0044238;GO:0044260;GO:0044281;GO:0046128;GO:0046483;GO:0055086;GO:0072521;GO:0090304	GO:0003824;GO:0008168;GO:0008757;GO:0016740;GO:0016741;GO:0016765	GO:0005634;GO:0005829;GO:0043226;GO:0043227;GO:0043229;GO:0043231;GO:0044424;GO:0044444;GO:0044464	GO:0006139;GO:0006396;GO:0006399;GO:0006730;GO:0006807;GO:0008033;GO:0008152;GO:0009116;GO:0009451;GO:0009987;GO:0016070;GO:0034641;GO:0043170;GO:0043412;GO:0044237;GO:0044238;GO:0044281;GO:0046483;GO:0055086	GO:0005634;GO:0005829;GO:0043226;GO:0043229;GO:0043231;GO:0044464	CADANIAG00002616	CADANIAP00002616	CADANIAT00002616				IPR030382;IPR029063;IPR026274	MeTrfase_TRM5/TYW2;SAM-dependent_MTases;tRNA_wybutosine_synth_prot_2								PS51684	SAM_MT_TRM5_TYW2	tRNA wybutosine-synthesizing protein 2					Emericella nidulans (strain FGSC A4 / ATCC 38163 / CBS 112.46 / NRRL 194 / M139)	Q5BH50_EMENI			COG2520
Q5BFQ5;C8VS30	+	rRNA modification;RNA methylation;nucleobase-containing compound metabolic process;rRNA processing;RNA processing;one-carbon metabolic process;nitrogen compound metabolic process;metabolic process;RNA modification;cellular process;RNA metabolic process;rRNA metabolic process;rRNA methylation;methylation;ncRNA processing;cellular nitrogen compound metabolic process;ncRNA metabolic process;macromol…	catalytic activity;methyltransferase activity;C-methyltransferase activity;RNA methyltransferase activity;rRNA methyltransferase activity;S-adenosylmethionine-dependent methyltransferase activity;rRNA (cytosine-C5-)-methyltransferase activity;rRNA (cytosine) methyltransferase activity;transferase activity;transferase activity, transferring one-carbon groups	nucleolus;organelle;non-membrane-bounded organelle;intracellular organelle;intracellular non-membrane-bounded organelle;organelle part;intracellular part;nuclear part;intracellular organelle part;cell part	nucleobase-containing compound metabolic process;rRNA processing;RNA processing;one-carbon metabolic process;nitrogen compound metabolic process;metabolic process;RNA modification;cellular process;RNA metabolic process;cellular nitrogen compound metabolic process;macromolecule metabolic process;macromolecule modification;cellular metabolic process;primary metabolic process;small molecule metaboli…	nucleolus;organelle;intracellular organelle;intracellular non-membrane-bounded organelle;cell part		Nol1_Nop2_Fmu		Completeproteome;Referenceproteome		GO:0000154;GO:0001510;GO:0006139;GO:0006364;GO:0006396;GO:0006730;GO:0006807;GO:0008152;GO:0009451;GO:0009987;GO:0016070;GO:0016072;GO:0031167;GO:0032259;GO:0034470;GO:0034641;GO:0034660;GO:0043170;GO:0043412;GO:0043414;GO:0044237;GO:0044238;GO:0044260;GO:0044281;GO:0070475;GO:0090304	GO:0003824;GO:0008168;GO:0008169;GO:0008173;GO:0008649;GO:0008757;GO:0009383;GO:0016434;GO:0016740;GO:0016741	GO:0005730;GO:0043226;GO:0043228;GO:0043229;GO:0043232;GO:0044422;GO:0044424;GO:0044428;GO:0044446;GO:0044464	GO:0006139;GO:0006364;GO:0006396;GO:0006730;GO:0006807;GO:0008152;GO:0009451;GO:0009987;GO:0016070;GO:0034641;GO:0043170;GO:0043412;GO:0044237;GO:0044238;GO:0044281	GO:0005730;GO:0043226;GO:0043229;GO:0043232;GO:0044464	CADANIAG00002052	CADANIAP00002052	CADANIAT00002052				IPR001678;IPR023267;IPR029063	MeTrfase_RsmB/NOP2;RCMT;SAM-dependent_MTases					PF01189	PR02008	RCMTFAMILY	PS51686	SAM_MT_RSMB_NOP						Emericella nidulans (strain FGSC A4 / ATCC 38163 / CBS 112.46 / NRRL 194 / M139)	Q5BFQ5_EMENI			COG0144
Q5B4I9;C8V886	+							Methyltransf_16		Completeproteome;Referenceproteome							CADANIAG00005897	CADANIAP00005897	CADANIAT00005897				IPR019410;IPR029063	Nicotinamide_N-MeTfrase-like;SAM-dependent_MTases					PF10294										Emericella nidulans (strain FGSC A4 / ATCC 38163 / CBS 112.46 / NRRL 194 / M139)	Q5B4I9_EMENI			COG3897
Q5B7V2;C8VHP4	+		catalytic activity;methyltransferase activity;S-methyltransferase activity;S-adenosylmethionine-dependent methyltransferase activity;homocysteine S-methyltransferase activity;transferase activity;transferase activity, transferring one-carbon groups				Cysteine and methionine metabolism	S-methyl_trans		Completeproteome;Referenceproteome			GO:0003824;GO:0008168;GO:0008172;GO:0008757;GO:0008898;GO:0016740;GO:0016741				CADANIAG00009662	CADANIAP00009662	CADANIAT00009662				IPR003726	S_MeTrfase	ko00270				PF02574			PS50970	HCY						Emericella nidulans (strain FGSC A4 / ATCC 38163 / CBS 112.46 / NRRL 194 / M139)	Q5B7V2_EMENI			COG2040
Q5B518;C8V8Y1	+									Completeproteome;Referenceproteome							CADANIAG00006096	CADANIAP00006096	CADANIAT00006096				IPR029063	SAM-dependent_MTases															Emericella nidulans (strain FGSC A4 / ATCC 38163 / CBS 112.46 / NRRL 194 / M139)	Q5B518_EMENI			NOG310352
Q5AVU1	+		catalytic activity;binding;iron ion binding;methyltransferase activity;oxidoreductase activity;oxidoreductase activity, acting on paired donors, with incorporation or reduction of molecular oxygen;transferase activity;transferase activity, transferring one-carbon groups;heme binding;ion binding;cation binding;metal ion binding;tetrapyrrole binding;transition metal ion binding				Benzoate degradation;Aminobenzoate degradation	DRMBL;LSM;Methyltransf_11;p450					GO:0003824;GO:0005488;GO:0005506;GO:0008168;GO:0016491;GO:0016705;GO:0016740;GO:0016741;GO:0020037;GO:0043167;GO:0043169;GO:0046872;GO:0046906;GO:0046914									AN7589.2	IPR001279;IPR001128;IPR017972;IPR002401;IPR011084;IPR010920;IPR013216;IPR001163;IPR006649;IPR029063	Beta-lactamas-like;Cyt_P450;Cyt_P450_CS;Cyt_P450_E_grp-I;DRMBL;LSM_dom;Methyltransf_11;Ribonucl_LSM;Ribonucl_LSM_euk/arc;SAM-dependent_MTases	ko00362;ko00627				PF07522;PF01423;PF08241;PF00067	PR00463;PR00385	EP450I;P450	PS00086	CYTOCHROME_P450				SM00651	Sm	Emericella nidulans (strain FGSC A4 / ATCC 38163 / CBS 112.46 / NRRL 194 / M139)	Q5AVU1_EMENI			COG1236
Q5AYB7	+		catalytic activity;methyltransferase activity;transferase activity;transferase activity, transferring one-carbon groups					Methyltransf_10					GO:0003824;GO:0008168;GO:0016740;GO:0016741									AN6713.2	IPR010286	rRNA_lsu_MeTfrase_F-like					PF05971										Emericella nidulans (strain FGSC A4 / ATCC 38163 / CBS 112.46 / NRRL 194 / M139)	Q5AYB7_EMENI			COG3129
C8V7Y1	+	one-carbon metabolic process;metabolic process;cellular process;methylation;cellular metabolic process;small molecule metabolic process	catalytic activity;methyltransferase activity;S-adenosylmethionine-dependent methyltransferase activity;transferase activity;transferase activity, transferring one-carbon groups	cytoplasm;intracellular part;cell part	one-carbon metabolic process;metabolic process;cellular process;cellular metabolic process;small molecule metabolic process	cytoplasm;cell part				Completeproteome;Referenceproteome		GO:0006730;GO:0008152;GO:0009987;GO:0032259;GO:0044237;GO:0044281	GO:0003824;GO:0008168;GO:0008757;GO:0016740;GO:0016741	GO:0005737;GO:0044424;GO:0044464	GO:0006730;GO:0008152;GO:0009987;GO:0044237;GO:0044281	GO:0005737;GO:0044464	CADANIAG00005289	CADANIAP00005289	CADANIAT00005289			ANIA_05091	IPR029063	SAM-dependent_MTases															Emericella nidulans (strain FGSC A4 / ATCC 38163 / CBS 112.46 / NRRL 194 / M139)	C8V7Y1_EMENI
C8VLY3	+	regulation of translation;protein modification process;protein methylation;one-carbon metabolic process;metabolic process;protein alkylation;regulation of biosynthetic process;cellular process;regulation of gene expression;regulation of macromolecule biosynthetic process;posttranscriptional regulation of gene expression;peptidyl-glutamine methylation;regulation of metabolic process;protein metabo…	nucleic acid binding;catalytic activity;binding;methyltransferase activity;protein methyltransferase activity;S-adenosylmethionine-dependent methyltransferase activity;transferase activity;transferase activity, transferring one-carbon groups	cytosol;macromolecular complex;methyltransferase complex;eRF1 methyltransferase complex;protein complex;intracellular part;cytoplasmic part;cell part	regulation of translation;protein modification process;one-carbon metabolic process;metabolic process;protein alkylation;cellular process;protein metabolic process;macromolecule metabolic process;macromolecule modification;cellular metabolic process;primary metabolic process;small molecule metabolic process;biological regulation	cytosol;macromolecular complex;protein complex;cell part				Completeproteome;Referenceproteome		GO:0006417;GO:0006464;GO:0006479;GO:0006730;GO:0008152;GO:0008213;GO:0009889;GO:0009987;GO:0010468;GO:0010556;GO:0010608;GO:0018364;GO:0019222;GO:0019538;GO:0031323;GO:0031326;GO:0032259;GO:0032268;GO:0043170;GO:0043412;GO:0043414;GO:0044237;GO:0044238;GO:0044260;GO:0044267;GO:0044281;GO:0050789;GO:0050794;GO:0051246;GO:0060255;GO:0065007;GO:0080090;GO:2000112	GO:0003676;GO:0003824;GO:0005488;GO:0008168;GO:0008276;GO:0008757;GO:0016740;GO:0016741	GO:0005829;GO:0032991;GO:0034708;GO:0035657;GO:0043234;GO:0044424;GO:0044444;GO:0044464	GO:0006417;GO:0006464;GO:0006730;GO:0008152;GO:0008213;GO:0009987;GO:0019538;GO:0043170;GO:0043412;GO:0044237;GO:0044238;GO:0044281;GO:0065007	GO:0005829;GO:0032991;GO:0043234;GO:0044464	CADANIAG00008777	CADANIAP00008777	CADANIAT00008777			ANIA_02104	IPR002052;IPR029063	DNA_methylase_N6_adenine_CS;SAM-dependent_MTases								PS00092	N6_MTASE						Emericella nidulans (strain FGSC A4 / ATCC 38163 / CBS 112.46 / NRRL 194 / M139)	C8VLY3_EMENI
Q5AQB9	+	RNA methylation;nucleobase-containing compound metabolic process;RNA processing;one-carbon metabolic process;nitrogen compound metabolic process;metabolic process;RNA modification;RNA capping;cellular process;RNA metabolic process;methylation;cellular nitrogen compound metabolic process;macromolecule metabolic process;macromolecule modification;macromolecule methylation;cellular metabolic process…	catalytic activity;methyltransferase activity;transferase activity;transferase activity, transferring one-carbon groups		nucleobase-containing compound metabolic process;RNA processing;one-carbon metabolic process;nitrogen compound metabolic process;metabolic process;RNA modification;cellular process;RNA metabolic process;cellular nitrogen compound metabolic process;macromolecule metabolic process;macromolecule modification;cellular metabolic process;primary metabolic process;small molecule metabolic process			Methyltransf_15				GO:0001510;GO:0006139;GO:0006396;GO:0006730;GO:0006807;GO:0008152;GO:0009451;GO:0009452;GO:0009987;GO:0016070;GO:0032259;GO:0034641;GO:0043170;GO:0043412;GO:0043414;GO:0044237;GO:0044238;GO:0044260;GO:0044281;GO:0090304	GO:0003824;GO:0008168;GO:0016740;GO:0016741		GO:0006139;GO:0006396;GO:0006730;GO:0006807;GO:0008152;GO:0009451;GO:0009987;GO:0016070;GO:0034641;GO:0043170;GO:0043412;GO:0044237;GO:0044238;GO:0044281							AN9511.2	IPR019012;IPR029063	RNA_cap_Gua-N2-MeTrfase;SAM-dependent_MTases					PF09445										Emericella nidulans (strain FGSC A4 / ATCC 38163 / CBS 112.46 / NRRL 194 / M139)	Q5AQB9_EMENI
Q5BA83;C8VPT1	+		catalytic activity;binding;zinc ion binding;oxidoreductase activity;transferase activity;ion binding;cation binding;metal ion binding;transition metal ion binding					Acyl_transf_1;ADH_zinc_N;ketoacyl-synt;Ketoacyl-synt_C;KR;Methyltransf_12;PP-binding;PS-DH		Completeproteome;Phosphopantetheine;Referenceproteome;Transferase			GO:0003824;GO:0005488;GO:0008270;GO:0016491;GO:0016740;GO:0043167;GO:0043169;GO:0046872;GO:0046914				CADANIAG00009277	CADANIAP00009277	CADANIAT00009277				IPR001227;IPR009081;IPR014043;IPR016035;IPR013149;IPR011032;IPR018201;IPR014031;IPR014030;IPR016036;IPR013217;IPR016040;IPR020801;IPR020841;IPR020807;IPR020843;IPR013968;IPR006162;IPR029063;IPR016039;IPR016038	Ac_transferase_dom;Acyl_carrier_prot-like;Acyl_transferase;Acyl_Trfase/lysoPLipase;ADH_C;GroES-like;Ketoacyl_synth_AS;Ketoacyl_synth_C;Ketoacyl_synth_N;Malonyl_transacylase_ACP-bd;Methyltransf_12;NAD(P)-bd_dom;PKS_acyl_transferase;PKS_Beta-ketoAc_synthase_dom;PKS_dehydratase;PKS_ER;PKS_KR;Ppantetheine_attach_site;SAM-dependent_MTases;Thiolase-like;Thiolase-like_subgr					PF00698;PF00107;PF00109;PF02801;PF08659;PF08242;PF00550;PF14765			PS50075;PS00606;PS00012	ACP_DOMAIN;B_KETOACYL_SYNTHASE;PHOSPHOPANTETHEINE				SM00827;SM00826;SM00829;SM00822;SM00825	PKS_AT;PKS_DH;PKS_ER;PKS_KR;PKS_KS	Emericella nidulans (strain FGSC A4 / ATCC 38163 / CBS 112.46 / NRRL 194 / M139)	Q5BA83_EMENI			COG3321
Q5B9M1;C8VJW3	+	rRNA modification;endonucleolytic cleavage in ITS1 to separate SSU-rRNA from 5.8S rRNA and LSU-rRNA from tricistronic rRNA transcript (SSU-rRNA, 5.8S rRNA, LSU-rRNA);cleavage involved in rRNA processing;endonucleolytic cleavage to generate mature 5'-end of SSU-rRNA from (SSU-rRNA, 5.8S rRNA, LSU-rRNA);endonucleolytic cleavage involved in rRNA processing;endonucleolytic cleavage of tricistronic rR…	nucleic acid binding;RNA binding;catalytic activity;binding;methyltransferase activity;transferase activity;transferase activity, transferring one-carbon groups;rRNA binding	nucleolus;cytosol;microtubule;nuclear microtubule;ribonucleoprotein complex;preribosome;90S preribosome;small-subunit processome;macromolecular complex;organelle;non-membrane-bounded organelle;intracellular organelle;intracellular non-membrane-bounded organelle;protein complex;organelle part;intracellular part;nuclear part;cytoskeletal part;cytoplasmic part;intracellular organelle part;cell part	nucleobase-containing compound metabolic process;rRNA processing;RNA processing;one-carbon metabolic process;nitrogen compound metabolic process;metabolic process;RNA modification;cellular process;RNA metabolic process;cellular nitrogen compound metabolic process;macromolecule metabolic process;macromolecule modification;cellular metabolic process;primary metabolic process;small molecule metaboli…	nucleolus;cytosol;ribonucleoprotein complex;preribosome;macromolecular complex;organelle;intracellular organelle;intracellular non-membrane-bounded organelle;protein complex;cell part	Ribosome biogenesis in eukaryotes	EMG1		Completeproteome;Referenceproteome		GO:0000154;GO:0000447;GO:0000469;GO:0000472;GO:0000478;GO:0000479;GO:0000480;GO:0000966;GO:0000967;GO:0001510;GO:0006139;GO:0006364;GO:0006396;GO:0006730;GO:0006807;GO:0008152;GO:0009451;GO:0009987;GO:0016070;GO:0016072;GO:0031167;GO:0032259;GO:0034470;GO:0034471;GO:0034641;GO:0034660;GO:0043170;GO:0043412;GO:0043414;GO:0044237;GO:0044238;GO:0044260;GO:0044281;GO:0070475;GO:0090304;GO:0090305	GO:0003676;GO:0003723;GO:0003824;GO:0005488;GO:0008168;GO:0016740;GO:0016741;GO:0019843	GO:0005730;GO:0005829;GO:0005874;GO:0005880;GO:0030529;GO:0030684;GO:0030686;GO:0032040;GO:0032991;GO:0043226;GO:0043228;GO:0043229;GO:0043232;GO:0043234;GO:0044422;GO:0044424;GO:0044428;GO:0044430;GO:0044444;GO:0044446;GO:0044464	GO:0006139;GO:0006364;GO:0006396;GO:0006730;GO:0006807;GO:0008152;GO:0009451;GO:0009987;GO:0016070;GO:0034641;GO:0043170;GO:0043412;GO:0044237;GO:0044238;GO:0044281	GO:0005730;GO:0005829;GO:0030529;GO:0030684;GO:0032991;GO:0043226;GO:0043229;GO:0043232;GO:0043234;GO:0044464	CADANIAG00010350	CADANIAP00010350	CADANIAT00010350				IPR029028;IPR005304	Alpha/beta_knot_MTases;Rbsml_bgen_MeTrfase_EMG1/NEP1	ko03008				PF03587										Emericella nidulans (strain FGSC A4 / ATCC 38163 / CBS 112.46 / NRRL 194 / M139)	Q5B9M1_EMENI			COG1756
Q5BE27;C8VST8	+	one-carbon metabolic process;metabolic process;cellular process;methylation;cellular metabolic process;small molecule metabolic process	catalytic activity;methyltransferase activity;S-adenosylmethionine-dependent methyltransferase activity;transferase activity;transferase activity, transferring one-carbon groups	cytoplasm;intracellular part;cell part	one-carbon metabolic process;metabolic process;cellular process;cellular metabolic process;small molecule metabolic process	cytoplasm;cell part				Completeproteome;Referenceproteome		GO:0006730;GO:0008152;GO:0009987;GO:0032259;GO:0044237;GO:0044281	GO:0003824;GO:0008168;GO:0008757;GO:0016740;GO:0016741	GO:0005737;GO:0044424;GO:0044464	GO:0006730;GO:0008152;GO:0009987;GO:0044237;GO:0044281	GO:0005737;GO:0044464	CADANIAG00001421	CADANIAP00001421	CADANIAT00001421				IPR029063	SAM-dependent_MTases															Emericella nidulans (strain FGSC A4 / ATCC 38163 / CBS 112.46 / NRRL 194 / M139)	Q5BE27_EMENI			COG0500
Q5B768;C8V465	+	metabolic process;secondary metabolic process	catalytic activity;binding;zinc ion binding;oxidoreductase activity;transferase activity;ion binding;cation binding;metal ion binding;transition metal ion binding		metabolic process;secondary metabolic process			Acyl_transf_1;ADH_zinc_N;ketoacyl-synt;Ketoacyl-synt_C;KR;Methyltransf_12;PP-binding;PS-DH		Completeproteome;Phosphopantetheine;Referenceproteome;Transferase		GO:0008152;GO:0019748	GO:0003824;GO:0005488;GO:0008270;GO:0016491;GO:0016740;GO:0043167;GO:0043169;GO:0046872;GO:0046914		GO:0008152;GO:0019748		CADANIAG00005130	CADANIAP00005130	CADANIAT00005130				IPR001227;IPR009081;IPR014043;IPR016035;IPR013149;IPR011032;IPR018201;IPR014031;IPR014030;IPR016036;IPR013217;IPR016040;IPR020801;IPR020807;IPR020843;IPR013968;IPR006162;IPR029063;IPR016039;IPR016038	Ac_transferase_dom;Acyl_carrier_prot-like;Acyl_transferase;Acyl_Trfase/lysoPLipase;ADH_C;GroES-like;Ketoacyl_synth_AS;Ketoacyl_synth_C;Ketoacyl_synth_N;Malonyl_transacylase_ACP-bd;Methyltransf_12;NAD(P)-bd_dom;PKS_acyl_transferase;PKS_dehydratase;PKS_ER;PKS_KR;Ppantetheine_attach_site;SAM-dependent_MTases;Thiolase-like;Thiolase-like_subgr					PF00698;PF00107;PF00109;PF02801;PF08659;PF08242;PF00550;PF14765			PS50075;PS00606;PS00012	ACP_DOMAIN;B_KETOACYL_SYNTHASE;PHOSPHOPANTETHEINE				SM00827;SM00826;SM00829;SM00822	PKS_AT;PKS_DH;PKS_ER;PKS_KR	Emericella nidulans (strain FGSC A4 / ATCC 38163 / CBS 112.46 / NRRL 194 / M139)	Q5B768_EMENI			COG3321
C8V3W4	+		nucleic acid binding;catalytic activity;tRNA (guanine-N2-)-methyltransferase activity;binding;methyltransferase activity;N-methyltransferase activity;RNA methyltransferase activity;tRNA methyltransferase activity;S-adenosylmethionine-dependent methyltransferase activity;tRNA (guanine) methyltransferase activity;transferase activity;transferase activity, transferring one-carbon groups	nucleus;cytosol;macromolecular complex;methyltransferase complex;organelle;membrane-bounded organelle;intracellular organelle;intracellular membrane-bounded organelle;protein complex;tRNA methyltransferase complex;tRNA (m2G10) methyltransferase complex;intracellular part;cytoplasmic part;cell part		nucleus;cytosol;macromolecular complex;organelle;intracellular organelle;intracellular membrane-bounded organelle;protein complex;tRNA methyltransferase complex;cell part		UPF0020		Completeproteome;Referenceproteome			GO:0003676;GO:0003824;GO:0004809;GO:0005488;GO:0008168;GO:0008170;GO:0008173;GO:0008175;GO:0008757;GO:0016423;GO:0016740;GO:0016741	GO:0005634;GO:0005829;GO:0032991;GO:0034708;GO:0043226;GO:0043227;GO:0043229;GO:0043231;GO:0043234;GO:0043527;GO:0043528;GO:0044424;GO:0044444;GO:0044464		GO:0005634;GO:0005829;GO:0032991;GO:0043226;GO:0043229;GO:0043231;GO:0043234;GO:0043527;GO:0044464	CADANIAG00005089	CADANIAP00005089	CADANIAT00005089			ANIA_10450	IPR002052;IPR000241;IPR029063;IPR016691	DNA_methylase_N6_adenine_CS;RNA_methylase_dom;SAM-dependent_MTases;tRNA_mtfrase_TRM11					PF01170			PS00092;PS51627	N6_MTASE;SAM_MT_TRM11						Emericella nidulans (strain FGSC A4 / ATCC 38163 / CBS 112.46 / NRRL 194 / M139)	C8V3W4_EMENI
Q5B780	+																					AN3600.2	IPR029063	SAM-dependent_MTases															Emericella nidulans (strain FGSC A4 / ATCC 38163 / CBS 112.46 / NRRL 194 / M139)	Q5B780_EMENI			NOG138914
C8V479	+									Completeproteome;Referenceproteome							CADANIAG00005144	CADANIAP00005144	CADANIAT00005144			ANIA_03600	IPR029063	SAM-dependent_MTases															Emericella nidulans (strain FGSC A4 / ATCC 38163 / CBS 112.46 / NRRL 194 / M139)	C8V479_EMENI
Q5BH39	+	nucleobase-containing compound metabolic process;RNA processing;nitrogen compound metabolic process;metabolic process;cellular process;RNA metabolic process;cellular nitrogen compound metabolic process;macromolecule metabolic process;cellular metabolic process;primary metabolic process;cellular macromolecule metabolic process;nucleic acid metabolic process	catalytic activity;methyltransferase activity;RNA methyltransferase activity;tRNA methyltransferase activity;S-adenosylmethionine-dependent methyltransferase activity;tRNA (uracil) methyltransferase activity;transferase activity;transferase activity, transferring one-carbon groups;tRNA (m5U54) methyltransferase activity;S-adenosylmethionine-dependent tRNA (m5U54) methyltransferase activity		nucleobase-containing compound metabolic process;RNA processing;nitrogen compound metabolic process;metabolic process;cellular process;RNA metabolic process;cellular nitrogen compound metabolic process;macromolecule metabolic process;cellular metabolic process;primary metabolic process			tRNA_U5-meth_tr				GO:0006139;GO:0006396;GO:0006807;GO:0008152;GO:0009987;GO:0016070;GO:0034641;GO:0043170;GO:0044237;GO:0044238;GO:0044260;GO:0090304	GO:0003824;GO:0008168;GO:0008173;GO:0008175;GO:0008757;GO:0016300;GO:0016740;GO:0016741;GO:0030696;GO:0030697		GO:0006139;GO:0006396;GO:0006807;GO:0008152;GO:0009987;GO:0016070;GO:0034641;GO:0043170;GO:0044237;GO:0044238							AN0141.2	IPR030390;IPR030391;IPR012340;IPR029063;IPR025795;IPR010280	MeTrfase_TrmA_AS;MeTrfase_TrmA_CS;NA-bd_OB-fold;SAM-dependent_MTases;tRNA_(uracil-5-)_MeTrfase;U5_MeTrfase_fam					PF05958			PS51687;PS51622;PS01230;PS01231	SAM_MT_RNA_M5U;SAM_MT_RNA_M5U_2;TRMA_1;TRMA_2						Emericella nidulans (strain FGSC A4 / ATCC 38163 / CBS 112.46 / NRRL 194 / M139)	Q5BH39_EMENI			COG2265
C8VLH9	+							N2227		Completeproteome;Referenceproteome							CADANIAG00007933	CADANIAP00007933	CADANIAT00007933			ANIA_11151	IPR012901;IPR029063	N2227;SAM-dependent_MTases					PF07942										Emericella nidulans (strain FGSC A4 / ATCC 38163 / CBS 112.46 / NRRL 194 / M139)	C8VLH9_EMENI
Q5BCI7;C8VP46	+	generation of precursor metabolites and energy;one-carbon metabolic process;coenzyme metabolic process;oxidoreduction coenzyme metabolic process;ubiquinone metabolic process;ubiquinone biosynthetic process;metabolic process;biosynthetic process;aerobic respiration;coenzyme biosynthetic process;cellular process;energy derivation by oxidation of organic compounds;methylation;cellular ketone metabol…	catalytic activity;methyltransferase activity;C-methyltransferase activity;2-polyprenyl-6-methoxy-1,4-benzoquinone methyltransferase activity;S-adenosylmethionine-dependent methyltransferase activity;transferase activity;transferase activity, transferring one-carbon groups;quinone cofactor methyltransferase activity;2-hexaprenyl-6-methoxy-1,4-benzoquinone methyltransferase activity	mitochondrion;mitochondrial matrix;membrane-enclosed lumen;organelle;membrane-bounded organelle;intracellular organelle;intracellular membrane-bounded organelle;organelle lumen;organelle part;intracellular part;mitochondrial part;cytoplasmic part;intracellular organelle part;cell part;intracellular organelle lumen	generation of precursor metabolites and energy;one-carbon metabolic process;metabolic process;biosynthetic process;cellular process;cellular ketone metabolic process;cellular metabolic process;small molecule metabolic process;cellular respiration;cofactor metabolic process	mitochondrion;organelle;intracellular organelle;intracellular membrane-bounded organelle;cell part	Ubiquinone and other terpenoid-quinone biosynthesis	Ubie_methyltran	BURTON_ADIPOGENESIS_6;chr12q24;CHUNG_BLISTER_CYTOTOXICITY_UP;GRAESSMANN_APOPTOSIS_BY_DOXORUBICIN_DN;GRAESSMANN_RESPONSE_TO_MC_AND_DOXORUBICIN_DN;GSE15930_NAIVE_VS_24H_IN_VITRO_STIM_CD8_TCELL_DN;GSE15930_NAIVE_VS_24H_IN_VITRO_STIM_IL12_CD8_TCELL_DN;GSE15930_NAIVE_VS_24H_IN_VITRO_STIM_INFAB_CD8_TCELL_DN;GSE17721_0.5H_VS_12H_GARDIQUIMOD_BMDM_UP;GSE17721_0.5H_VS_24H_PAM3CSK4_BMDM_UP;GSE17721_0.5H_VS_…	Completeproteome;Membrane;Methyltransferase;Mitochondrion;Mitochondrioninnermembrane;Referenceproteome;S-adenosyl-L-methionine;Transferase;Transitpeptide;Ubiquinonebiosynthesis		GO:0006091;GO:0006730;GO:0006732;GO:0006733;GO:0006743;GO:0006744;GO:0008152;GO:0009058;GO:0009060;GO:0009108;GO:0009987;GO:0015980;GO:0032259;GO:0042180;GO:0042375;GO:0044237;GO:0044249;GO:0044281;GO:0045333;GO:0045426;GO:0051186;GO:0051188;GO:0055114	GO:0003824;GO:0008168;GO:0008169;GO:0008425;GO:0008757;GO:0016740;GO:0016741;GO:0030580;GO:0043334	GO:0005739;GO:0005759;GO:0031974;GO:0043226;GO:0043227;GO:0043229;GO:0043231;GO:0043233;GO:0044422;GO:0044424;GO:0044429;GO:0044444;GO:0044446;GO:0044464;GO:0070013	GO:0006091;GO:0006730;GO:0008152;GO:0009058;GO:0009987;GO:0042180;GO:0044237;GO:0044281;GO:0045333;GO:0051186	GO:0005739;GO:0043226;GO:0043229;GO:0043231;GO:0044464	CADANIAG00008390	CADANIAP00008390	CADANIAT00008390			COQ5	IPR029063;IPR004033;IPR023576	SAM-dependent_MTases;UbiE/COQ5_MeTrFase;UbiE/COQ5_MeTrFase_CS	ko00130				PF01209			PS51608;PS01183;PS01184	SAM_MT_UBIE;UBIE_1;UBIE_2	2-methoxy-6-polyprenyl-1,4-benzoquinol methylase, mitochondrial					Emericella nidulans (strain FGSC A4 / ATCC 38163 / CBS 112.46 / NRRL 194 / M139)	Q5BCI7_EMENI		2.1.1.201	COG2226
Q5BB90;C8VMH9	+	organelle organization;cytoskeleton organization;actin filament organization;cellular process;cellular component organization;cellular component assembly;actin filament-based process;actin cytoskeleton organization;actin filament bundle assembly;cellular component organization or biogenesis;cellular component organization or biogenesis at cellular level;cellular component organization at cellular…	catalytic activity;methyltransferase activity;RNA methyltransferase activity;tRNA methyltransferase activity;S-adenosylmethionine-dependent methyltransferase activity;tRNA (cytosine) methyltransferase activity;transferase activity;transferase activity, transferring one-carbon groups;tRNA (cytosine-3-)-methyltransferase activity	actin filament;site of polarized growth;actin cortical patch;actin filament bundle;macromolecular complex;protein complex;mating projection tip;organelle part;intracellular part;cytoskeletal part;cytoplasmic part;intracellular organelle part;cell cortex part;cell projection part;cell part	organelle organization;cytoskeleton organization;cellular process;cellular component organization;cellular component assembly	site of polarized growth;macromolecular complex;protein complex;cell part		Methyltransf_12		Completeproteome;Referenceproteome		GO:0006996;GO:0007010;GO:0007015;GO:0009987;GO:0016043;GO:0022607;GO:0030029;GO:0030036;GO:0051017;GO:0071840;GO:0071841;GO:0071842;GO:0071844	GO:0003824;GO:0008168;GO:0008173;GO:0008175;GO:0008757;GO:0016427;GO:0016740;GO:0016741;GO:0052735	GO:0005884;GO:0030427;GO:0030479;GO:0032432;GO:0032991;GO:0043234;GO:0043332;GO:0044422;GO:0044424;GO:0044430;GO:0044444;GO:0044446;GO:0044448;GO:0044463;GO:0044464	GO:0006996;GO:0007010;GO:0009987;GO:0016043;GO:0022607	GO:0030427;GO:0032991;GO:0043234;GO:0044464	CADANIAG00008873	CADANIAP00008873	CADANIAT00008873				IPR013217;IPR026113;IPR029063	Methyltransf_12;MeTrfase;SAM-dependent_MTases					PF08242										Emericella nidulans (strain FGSC A4 / ATCC 38163 / CBS 112.46 / NRRL 194 / M139)	Q5BB90_EMENI			NOG258359
Q5AVQ8;C8VBW9	+		catalytic activity;methyltransferase activity;O-methyltransferase activity;transferase activity;transferase activity, transferring one-carbon groups							Completeproteome;Referenceproteome			GO:0003824;GO:0008168;GO:0008171;GO:0016740;GO:0016741				CADANIAG00000738	CADANIAP00000738	CADANIAT00000738				IPR016040;IPR002935	NAD(P)-bd_dom;O-MeTrfase_3															Emericella nidulans (strain FGSC A4 / ATCC 38163 / CBS 112.46 / NRRL 194 / M139)	Q5AVQ8_EMENI			NOG114997
Q5AS75;C8V9C5	+		catalytic activity;methyltransferase activity;RNA methyltransferase activity;rRNA methyltransferase activity;S-adenosylmethionine-dependent methyltransferase activity;rRNA (adenine) methyltransferase activity;transferase activity;transferase activity, transferring one-carbon groups	nucleolus;organelle;non-membrane-bounded organelle;intracellular organelle;intracellular non-membrane-bounded organelle;organelle part;intracellular part;nuclear part;intracellular organelle part;cell part		nucleolus;organelle;intracellular organelle;intracellular non-membrane-bounded organelle;cell part		DUF3321		Completeproteome;Methyltransferase;Nucleus;Referenceproteome;S-adenosyl-L-methionine;Transferase			GO:0003824;GO:0008168;GO:0008173;GO:0008649;GO:0008757;GO:0016433;GO:0016740;GO:0016741	GO:0005730;GO:0043226;GO:0043228;GO:0043229;GO:0043232;GO:0044422;GO:0044424;GO:0044428;GO:0044446;GO:0044464		GO:0005730;GO:0043226;GO:0043229;GO:0043232;GO:0044464	CADANIAG00006196	CADANIAP00006196	CADANIAT00006196				IPR021867;IPR029063	Bmt2;SAM-dependent_MTases					PF11968					25S rRNA adenine-N(1) methyltransferase					Emericella nidulans (strain FGSC A4 / ATCC 38163 / CBS 112.46 / NRRL 194 / M139)	Q5AS75_EMENI		2.1.1.-	NOG82219
C8VB77	+	nucleobase-containing compound metabolic process;pyrimidine nucleotide metabolic process;pyrimidine nucleotide biosynthetic process;dTMP biosynthetic process;RNA processing;tRNA metabolic process;tRNA modification;nucleoside phosphate metabolic process;nitrogen compound metabolic process;tRNA processing;metabolic process;queuosine biosynthetic process;guanosine metabolic process;7-methylguanosine…	catalytic activity;thymidylate synthase activity;methyltransferase activity;queuine tRNA-ribosyltransferase activity;transferase activity;transferase activity, transferring one-carbon groups;transferase activity, transferring glycosyl groups;transferase activity, transferring pentosyl groups;5,10-methylenetetrahydrofolate-dependent methyltransferase activity	nucleus;cytosol;organelle;membrane-bounded organelle;intracellular organelle;intracellular membrane-bounded organelle;intracellular part;cytoplasmic part;cell part	nucleobase-containing compound metabolic process;RNA processing;tRNA metabolic process;nitrogen compound metabolic process;tRNA processing;metabolic process;biosynthetic process;nucleoside metabolic process;nucleotide metabolic process;RNA modification;cellular process;RNA metabolic process;cellular nitrogen compound metabolic process;macromolecule metabolic process;macromolecule modification;cel…	nucleus;cytosol;organelle;intracellular organelle;intracellular membrane-bounded organelle;cell part		TGT;Thymidylat_synt		Completeproteome;Referenceproteome		GO:0006139;GO:0006220;GO:0006221;GO:0006231;GO:0006396;GO:0006399;GO:0006400;GO:0006753;GO:0006807;GO:0008033;GO:0008152;GO:0008616;GO:0008617;GO:0008618;GO:0009058;GO:0009116;GO:0009117;GO:0009119;GO:0009123;GO:0009124;GO:0009129;GO:0009130;GO:0009157;GO:0009162;GO:0009163;GO:0009165;GO:0009176;GO:0009177;GO:0009219;GO:0009221;GO:0009262;GO:0009263;GO:0009265;GO:0009394;GO:0009451;GO:0009987;GO:…	GO:0003824;GO:0004799;GO:0008168;GO:0008479;GO:0016740;GO:0016741;GO:0016757;GO:0016763;GO:0042083	GO:0005634;GO:0005829;GO:0043226;GO:0043227;GO:0043229;GO:0043231;GO:0044424;GO:0044444;GO:0044464	GO:0006139;GO:0006396;GO:0006399;GO:0006807;GO:0008033;GO:0008152;GO:0009058;GO:0009116;GO:0009117;GO:0009451;GO:0009987;GO:0016070;GO:0034641;GO:0043170;GO:0043412;GO:0044237;GO:0044238;GO:0044281;GO:0046483;GO:0055086	GO:0005634;GO:0005829;GO:0043226;GO:0043229;GO:0043231;GO:0044464	CADANIAG00000445	CADANIAP00000445	CADANIAT00000445			ANIA_07028	IPR004803;IPR023451;IPR000398;IPR020940;IPR002616	Queuine_tRNA-ribosylTrfase;Thymidate_synth/dCMP_Mease;Thymidylate_synthase;Thymidylate_synthase_AS;tRNA_ribo_trans-like					PF01702;PF00303	PR00108	THYMDSNTHASE	PS00091	THYMIDYLATE_SYNTHASE						Emericella nidulans (strain FGSC A4 / ATCC 38163 / CBS 112.46 / NRRL 194 / M139)	C8VB77_EMENI
Q5B2Y9	+																					AN5091.2	IPR029063	SAM-dependent_MTases															Emericella nidulans (strain FGSC A4 / ATCC 38163 / CBS 112.46 / NRRL 194 / M139)	Q5B2Y9_EMENI			NOG253737
C8VNR3	+	one-carbon metabolic process;metabolic process;cellular process;methylation;cellular metabolic process;small molecule metabolic process	catalytic activity;methyltransferase activity;S-adenosylmethionine-dependent methyltransferase activity;transferase activity;transferase activity, transferring one-carbon groups	cytoplasm;intracellular part;cell part	one-carbon metabolic process;metabolic process;cellular process;cellular metabolic process;small molecule metabolic process	cytoplasm;cell part				Completeproteome;Referenceproteome		GO:0006730;GO:0008152;GO:0009987;GO:0032259;GO:0044237;GO:0044281	GO:0003824;GO:0008168;GO:0008757;GO:0016740;GO:0016741	GO:0005737;GO:0044424;GO:0044464	GO:0006730;GO:0008152;GO:0009987;GO:0044237;GO:0044281	GO:0005737;GO:0044464	CADANIAG00009109	CADANIAP00009109	CADANIAT00009109			ANIA_02405	IPR029063	SAM-dependent_MTases															Emericella nidulans (strain FGSC A4 / ATCC 38163 / CBS 112.46 / NRRL 194 / M139)	C8VNR3_EMENI
Q5AZ33;C8V0D6	+		catalytic activity;methyltransferase activity;O-methyltransferase activity;transferase activity;transferase activity, transferring one-carbon groups					Methyltransf_2		Completeproteome;Referenceproteome;S-adenosyl-L-methionine			GO:0003824;GO:0008168;GO:0008171;GO:0016740;GO:0016741				CADANIAG00006527	CADANIAP00006527	CADANIAT00006527				IPR016461;IPR001077;IPR029063;IPR011991	O-MeTrfase_COMT;O_MeTrfase_2;SAM-dependent_MTases;WHTH_DNA-bd_dom					PF00891			PS51683	SAM_OMT_II						Emericella nidulans (strain FGSC A4 / ATCC 38163 / CBS 112.46 / NRRL 194 / M139)	Q5AZ33_EMENI			NOG330932
Q5BF15;C8VQ05	+			nucleus;cytosol;organelle;membrane-bounded organelle;intracellular organelle;intracellular membrane-bounded organelle;intracellular part;cytoplasmic part;cell part		nucleus;cytosol;organelle;intracellular organelle;intracellular membrane-bounded organelle;cell part		N2227		Completeproteome;Referenceproteome				GO:0005634;GO:0005829;GO:0043226;GO:0043227;GO:0043229;GO:0043231;GO:0044424;GO:0044444;GO:0044464		GO:0005634;GO:0005829;GO:0043226;GO:0043229;GO:0043231;GO:0044464	CADANIAG00001793	CADANIAP00001793	CADANIAT00001793				IPR012901;IPR029063	N2227;SAM-dependent_MTases					PF07942										Emericella nidulans (strain FGSC A4 / ATCC 38163 / CBS 112.46 / NRRL 194 / M139)	Q5BF15_EMENI			NOG323736
Q5AS97;C8V9K0	+	one-carbon metabolic process;metabolic process;cellular process;methylation;cellular metabolic process;small molecule metabolic process	catalytic activity;methyltransferase activity;S-adenosylmethionine-dependent methyltransferase activity;transferase activity;transferase activity, transferring one-carbon groups	cytoplasm;intracellular part;cell part	one-carbon metabolic process;metabolic process;cellular process;cellular metabolic process;small molecule metabolic process	cytoplasm;cell part				Completeproteome;Referenceproteome		GO:0006730;GO:0008152;GO:0009987;GO:0032259;GO:0044237;GO:0044281	GO:0003824;GO:0008168;GO:0008757;GO:0016740;GO:0016741	GO:0005737;GO:0044424;GO:0044464	GO:0006730;GO:0008152;GO:0009987;GO:0044237;GO:0044281	GO:0005737;GO:0044464	CADANIAG00006224	CADANIAP00006224	CADANIAT00006224				IPR029063	SAM-dependent_MTases															Emericella nidulans (strain FGSC A4 / ATCC 38163 / CBS 112.46 / NRRL 194 / M139)	Q5AS97_EMENI			NOG126793
Q5B361;C8V8K5	+	sulfur amino acid metabolic process;sulfur amino acid biosynthetic process;organic acid metabolic process;cellular amino acid metabolic process;methionine metabolic process;sulfur compound metabolic process;nitrogen compound metabolic process;metabolic process;cellular amino acid biosynthetic process;biosynthetic process;aspartate family amino acid metabolic process;aspartate family amino acid bi…	catalytic activity;5-methyltetrahydropteroyltriglutamate-homocysteine S-methyltransferase activity;binding;methyltransferase activity;S-methyltransferase activity;zinc ion binding;transferase activity;transferase activity, transferring one-carbon groups;5-methyltetrahydropteroyltri-L-glutamate-dependent methyltransferase activity;ion binding;cation binding;metal ion binding;transition metal ion b…		organic acid metabolic process;cellular amino acid metabolic process;sulfur compound metabolic process;nitrogen compound metabolic process;metabolic process;biosynthetic process;amine metabolic process;cellular process;cellular nitrogen compound metabolic process;cellular ketone metabolic process;cellular metabolic process;primary metabolic process;small molecule metabolic process			Meth_synt_2		Completeproteome;Referenceproteome		GO:0000096;GO:0000097;GO:0006082;GO:0006520;GO:0006555;GO:0006790;GO:0006807;GO:0008152;GO:0008652;GO:0009058;GO:0009066;GO:0009067;GO:0009086;GO:0009308;GO:0009309;GO:0009987;GO:0016053;GO:0019752;GO:0034641;GO:0042180;GO:0043436;GO:0044106;GO:0044237;GO:0044238;GO:0044249;GO:0044271;GO:0044272;GO:0044281;GO:0044283;GO:0046394	GO:0003824;GO:0003871;GO:0005488;GO:0008168;GO:0008172;GO:0008270;GO:0016740;GO:0016741;GO:0042085;GO:0043167;GO:0043169;GO:0046872;GO:0046914		GO:0006082;GO:0006520;GO:0006790;GO:0006807;GO:0008152;GO:0009058;GO:0009308;GO:0009987;GO:0034641;GO:0042180;GO:0044237;GO:0044238;GO:0044281		CADANIAG00005373	CADANIAP00005373	CADANIAT00005373				IPR002629	Met_Synth_C/arc					PF01717										Emericella nidulans (strain FGSC A4 / ATCC 38163 / CBS 112.46 / NRRL 194 / M139)	Q5B361_EMENI			COG0620
C8VRU2	+		catalytic activity;methyltransferase activity;N-methyltransferase activity;protein methyltransferase activity;S-adenosylmethionine-dependent methyltransferase activity;arginine N-methyltransferase activity;protein-arginine N-methyltransferase activity;transferase activity;transferase activity, transferring one-carbon groups;protein-arginine omega-N monomethyltransferase activity					RNA_Me_trans		Completeproteome;Referenceproteome			GO:0003824;GO:0008168;GO:0008170;GO:0008276;GO:0008757;GO:0016273;GO:0016274;GO:0016740;GO:0016741;GO:0035241				CADANIAG00001224	CADANIAP00001224	CADANIAT00001224			ANIA_10189	IPR007364	SAM-dep_RNA_MeTrfase_prd					PF04252										Emericella nidulans (strain FGSC A4 / ATCC 38163 / CBS 112.46 / NRRL 194 / M139)	C8VRU2_EMENI
C8VQX6	+	response to reactive oxygen species;RNA methylation;tRNA wobble base modification;tRNA wobble cytosine modification;wobble base cytosine methylation;nucleobase-containing compound metabolic process;RNA processing;tRNA metabolic process;tRNA modification;one-carbon metabolic process;nitrogen compound metabolic process;response to stress;response to oxidative stress;tRNA processing;metabolic proces…	tRNA binding;nucleic acid binding;RNA binding;catalytic activity;binding;methyltransferase activity;RNA methyltransferase activity;tRNA methyltransferase activity;S-adenosylmethionine-dependent methyltransferase activity;tRNA (cytosine) methyltransferase activity;tRNA (cytosine-5-)-methyltransferase activity;transferase activity;transferase activity, transferring one-carbon groups	nucleus;organelle;membrane-bounded organelle;intracellular organelle;intracellular membrane-bounded organelle;intracellular part;cell part	nucleobase-containing compound metabolic process;RNA processing;tRNA metabolic process;one-carbon metabolic process;nitrogen compound metabolic process;response to stress;response to oxidative stress;tRNA processing;metabolic process;RNA modification;cellular process;RNA metabolic process;cellular nitrogen compound metabolic process;response to chemical stimulus;macromolecule metabolic process;ma…	nucleus;organelle;intracellular organelle;intracellular membrane-bounded organelle;cell part		Nol1_Nop2_Fmu		Completeproteome;Referenceproteome		GO:0000302;GO:0001510;GO:0002097;GO:0002101;GO:0002127;GO:0006139;GO:0006396;GO:0006399;GO:0006400;GO:0006730;GO:0006807;GO:0006950;GO:0006979;GO:0008033;GO:0008152;GO:0009451;GO:0009987;GO:0010035;GO:0016070;GO:0030488;GO:0032259;GO:0033554;GO:0034470;GO:0034599;GO:0034614;GO:0034641;GO:0034660;GO:0042221;GO:0042542;GO:0043170;GO:0043412;GO:0043414;GO:0044237;GO:0044238;GO:0044260;GO:0044281;GO:…	GO:0000049;GO:0003676;GO:0003723;GO:0003824;GO:0005488;GO:0008168;GO:0008173;GO:0008175;GO:0008757;GO:0016427;GO:0016428;GO:0016740;GO:0016741	GO:0005634;GO:0043226;GO:0043227;GO:0043229;GO:0043231;GO:0044424;GO:0044464	GO:0006139;GO:0006396;GO:0006399;GO:0006730;GO:0006807;GO:0006950;GO:0006979;GO:0008033;GO:0008152;GO:0009451;GO:0009987;GO:0016070;GO:0034641;GO:0042221;GO:0043170;GO:0043412;GO:0044237;GO:0044238;GO:0044281;GO:0050896	GO:0005634;GO:0043226;GO:0043229;GO:0043231;GO:0044464	CADANIAG00001908	CADANIAP00001908	CADANIAT00001908			ANIA_00757	IPR018314;IPR001678;IPR023267;IPR023270;IPR029063	Fmu/NOL1/Nop2p_CS;MeTrfase_RsmB/NOP2;RCMT;RCMT_NCL1;SAM-dependent_MTases					PF01189	PR02008;PR02011	RCMTFAMILY;RCMTNCL1	PS01153;PS51686	NOL1_NOP2_SUN;SAM_MT_RSMB_NOP						Emericella nidulans (strain FGSC A4 / ATCC 38163 / CBS 112.46 / NRRL 194 / M139)	C8VQX6_EMENI
Q5BE60	+		catalytic activity;binding;methyltransferase activity;N-methyltransferase activity;zinc ion binding;protein methyltransferase activity;S-adenosylmethionine-dependent methyltransferase activity;lysine N-methyltransferase activity;protein-lysine N-methyltransferase activity;transferase activity;transferase activity, transferring one-carbon groups;histone-lysine N-methyltransferase activity;histone …	nucleus;chromosome;organelle;membrane-bounded organelle;non-membrane-bounded organelle;intracellular organelle;intracellular membrane-bounded organelle;intracellular non-membrane-bounded organelle;intracellular part;cell part		nucleus;chromosome;organelle;intracellular organelle;intracellular membrane-bounded organelle;intracellular non-membrane-bounded organelle;cell part	Lysine degradation	Pre-SET;SET		Chromosome;Methyltransferase;Nucleus;S-adenosyl-L-methionine;Transferase			GO:0003824;GO:0005488;GO:0008168;GO:0008170;GO:0008270;GO:0008276;GO:0008757;GO:0016278;GO:0016279;GO:0016740;GO:0016741;GO:0018024;GO:0042054;GO:0043167;GO:0043169;GO:0046872;GO:0046914	GO:0005634;GO:0005694;GO:0043226;GO:0043227;GO:0043228;GO:0043229;GO:0043231;GO:0043232;GO:0044424;GO:0044464		GO:0005634;GO:0005694;GO:0043226;GO:0043229;GO:0043231;GO:0043232;GO:0044464						AN1170.2	IPR003616;IPR007728;IPR001214	Post-SET_dom;Pre-SET_dom;SET_dom	ko00310				PF05033;PF00856			PS50868;PS50867;PS50280	POST_SET;PRE_SET;SET	Histone-lysine N-methyltransferase			SM00508;SM00317	PostSET;SET	Emericella nidulans (strain FGSC A4 / ATCC 38163 / CBS 112.46 / NRRL 194 / M139)	Q5BE60_EMENI		2.1.1.43	COG2940
Q5BFC3	+		nucleic acid binding;RNA binding;catalytic activity;binding;methyltransferase activity;RNA methyltransferase activity;tRNA methyltransferase activity;S-adenosylmethionine-dependent methyltransferase activity;tRNA (cytosine) methyltransferase activity;tRNA (cytosine-5-)-methyltransferase activity;transferase activity;transferase activity, transferring one-carbon groups					Nol1_Nop2_Fmu					GO:0003676;GO:0003723;GO:0003824;GO:0005488;GO:0008168;GO:0008173;GO:0008175;GO:0008757;GO:0016427;GO:0016428;GO:0016740;GO:0016741									AN0757.2	IPR018314;IPR001678;IPR023267;IPR023270;IPR029063	Fmu/NOL1/Nop2p_CS;MeTrfase_RsmB/NOP2;RCMT;RCMT_NCL1;SAM-dependent_MTases					PF01189	PR02008;PR02011	RCMTFAMILY;RCMTNCL1	PS01153;PS51686	NOL1_NOP2_SUN;SAM_MT_RSMB_NOP						Emericella nidulans (strain FGSC A4 / ATCC 38163 / CBS 112.46 / NRRL 194 / M139)	Q5BFC3_EMENI			COG0144
Q5BBJ6	+																					AN2084.2	IPR029063	SAM-dependent_MTases															Emericella nidulans (strain FGSC A4 / ATCC 38163 / CBS 112.46 / NRRL 194 / M139)	Q5BBJ6_EMENI			NOG242896
C8VEJ4	+									Completeproteome;Referenceproteome							CADANIAG00002967	CADANIAP00002967	CADANIAT00002967			ANIA_11082	IPR029063	SAM-dependent_MTases															Emericella nidulans (strain FGSC A4 / ATCC 38163 / CBS 112.46 / NRRL 194 / M139)	C8VEJ4_EMENI
Q5B4A3;C8V7Q9	+									Completeproteome;Referenceproteome							CADANIAG00005806	CADANIAP00005806	CADANIAT00005806				IPR029063	SAM-dependent_MTases															Emericella nidulans (strain FGSC A4 / ATCC 38163 / CBS 112.46 / NRRL 194 / M139)	Q5B4A3_EMENI
C8VEP7	+		catalytic activity;methyltransferase activity;transferase activity;transferase activity, transferring one-carbon groups					Methyltransf_11		Completeproteome;Referenceproteome			GO:0003824;GO:0008168;GO:0016740;GO:0016741				CADANIAG00003020	CADANIAP00003020	CADANIAT00003020			ANIA_08531	IPR013216;IPR029063	Methyltransf_11;SAM-dependent_MTases					PF08241										Emericella nidulans (strain FGSC A4 / ATCC 38163 / CBS 112.46 / NRRL 194 / M139)	C8VEP7_EMENI
Q5AV28;C8V3L3	+		catalytic activity;methyltransferase activity;O-methyltransferase activity;transferase activity;transferase activity, transferring one-carbon groups					Methyltransf_2		Completeproteome;Referenceproteome			GO:0003824;GO:0008168;GO:0008171;GO:0016740;GO:0016741				CADANIAG00003866	CADANIAP00003866	CADANIAT00003866				IPR001077;IPR029063	O_MeTrfase_2;SAM-dependent_MTases					PF00891										Emericella nidulans (strain FGSC A4 / ATCC 38163 / CBS 112.46 / NRRL 194 / M139)	Q5AV28_EMENI
Q5B3G2;C8V9F0	+		catalytic activity;methyltransferase activity;transferase activity;transferase activity, transferring one-carbon groups					Methyltransf_11		Completeproteome;Referenceproteome			GO:0003824;GO:0008168;GO:0016740;GO:0016741				CADANIAG00005482	CADANIAP00005482	CADANIAT00005482				IPR013216;IPR029063	Methyltransf_11;SAM-dependent_MTases					PF08241										Emericella nidulans (strain FGSC A4 / ATCC 38163 / CBS 112.46 / NRRL 194 / M139)	Q5B3G2_EMENI			COG0500
Q5BDR7;C8VS68	+		catalytic activity;methyltransferase activity;O-methyltransferase activity;transferase activity;transferase activity, transferring one-carbon groups					Methyltransf_2		Completeproteome;Referenceproteome;S-adenosyl-L-methionine			GO:0003824;GO:0008168;GO:0008171;GO:0016740;GO:0016741				CADANIAG00001301	CADANIAP00001301	CADANIAT00001301				IPR001077;IPR029063	O_MeTrfase_2;SAM-dependent_MTases					PF00891										Emericella nidulans (strain FGSC A4 / ATCC 38163 / CBS 112.46 / NRRL 194 / M139)	Q5BDR7_EMENI			euNOG27238
Q5ATJ7;C8VE81	+		catalytic activity;transferase activity;hydrolase activity					Abhydrolase_3;Acyl_transf_1;ketoacyl-synt;Ketoacyl-synt_C;Methyltransf_12;PP-binding;PS-DH		Completeproteome;Phosphopantetheine;Referenceproteome;Transferase			GO:0003824;GO:0016740;GO:0016787				CADANIAG00002854	CADANIAP00002854	CADANIAT00002854				IPR029058;IPR013094;IPR001227;IPR009081;IPR014043;IPR016035;IPR018201;IPR014031;IPR014030;IPR016036;IPR013217;IPR020807;IPR006162;IPR029063;IPR016039;IPR016038	AB_hydrolase;AB_hydrolase_3;Ac_transferase_dom;Acyl_carrier_prot-like;Acyl_transferase;Acyl_Trfase/lysoPLipase;Ketoacyl_synth_AS;Ketoacyl_synth_C;Ketoacyl_synth_N;Malonyl_transacylase_ACP-bd;Methyltransf_12;PKS_dehydratase;Ppantetheine_attach_site;SAM-dependent_MTases;Thiolase-like;Thiolase-like_subgr					PF07859;PF00698;PF00109;PF02801;PF08242;PF00550;PF14765			PS50075;PS00606;PS00012	ACP_DOMAIN;B_KETOACYL_SYNTHASE;PHOSPHOPANTETHEINE						Emericella nidulans (strain FGSC A4 / ATCC 38163 / CBS 112.46 / NRRL 194 / M139)	Q5ATJ7_EMENI			COG3321
C8V884	+	protein modification process;protein methylation;one-carbon metabolic process;transport;metabolic process;protein alkylation;cellular process;vesicle-mediated transport;peptidyl-lysine methylation;peptidyl-lysine monomethylation;peptidyl-lysine dimethylation;peptidyl-amino acid modification;peptidyl-lysine modification;protein metabolic process;methylation;macromolecule metabolic process;macromol…	catalytic activity;methyltransferase activity;N-methyltransferase activity;protein methyltransferase activity;S-adenosylmethionine-dependent methyltransferase activity;lysine N-methyltransferase activity;protein-lysine N-methyltransferase activity;transferase activity;transferase activity, transferring one-carbon groups	nucleus;cytosol;organelle;membrane-bounded organelle;intracellular organelle;intracellular membrane-bounded organelle;intracellular part;cytoplasmic part;cell part	protein modification process;one-carbon metabolic process;transport;metabolic process;protein alkylation;cellular process;vesicle-mediated transport;peptidyl-amino acid modification;protein metabolic process;macromolecule metabolic process;macromolecule modification;cellular metabolic process;primary metabolic process;small molecule metabolic process;establishment of localization	nucleus;cytosol;organelle;intracellular organelle;intracellular membrane-bounded organelle;cell part				Completeproteome;Referenceproteome		GO:0006464;GO:0006479;GO:0006730;GO:0006810;GO:0008152;GO:0008213;GO:0009987;GO:0016192;GO:0018022;GO:0018026;GO:0018027;GO:0018193;GO:0018205;GO:0019538;GO:0032259;GO:0043170;GO:0043412;GO:0043414;GO:0044237;GO:0044238;GO:0044260;GO:0044267;GO:0044281;GO:0051234	GO:0003824;GO:0008168;GO:0008170;GO:0008276;GO:0008757;GO:0016278;GO:0016279;GO:0016740;GO:0016741	GO:0005634;GO:0005829;GO:0043226;GO:0043227;GO:0043229;GO:0043231;GO:0044424;GO:0044444;GO:0044464	GO:0006464;GO:0006730;GO:0006810;GO:0008152;GO:0008213;GO:0009987;GO:0016192;GO:0018193;GO:0019538;GO:0043170;GO:0043412;GO:0044237;GO:0044238;GO:0044281;GO:0051234	GO:0005634;GO:0005829;GO:0043226;GO:0043229;GO:0043231;GO:0044464	CADANIAG00005895	CADANIAP00005895	CADANIAT00005895			ANIA_04543	IPR029063;IPR026635	SAM-dependent_MTases;See1-like															Emericella nidulans (strain FGSC A4 / ATCC 38163 / CBS 112.46 / NRRL 194 / M139)	C8V884_EMENI
Q5AUF7;C8V688	+	rRNA modification;maturation of LSU-rRNA from tricistronic rRNA transcript (SSU-rRNA, 5.8S rRNA, LSU-rRNA);maturation of LSU-rRNA;RNA methylation;nucleobase-containing compound metabolic process;rRNA processing;RNA processing;one-carbon metabolic process;nitrogen compound metabolic process;metabolic process;RNA modification;cellular process;RNA metabolic process;rRNA metabolic process;rRNA methyl…	nucleic acid binding;RNA binding;catalytic activity;binding;methyltransferase activity;C-methyltransferase activity;RNA methyltransferase activity;rRNA methyltransferase activity;S-adenosylmethionine-dependent methyltransferase activity;rRNA (cytosine-C5-)-methyltransferase activity;rRNA (cytosine) methyltransferase activity;transferase activity;transferase activity, transferring one-carbon groups	nucleus;ribonucleoprotein complex;preribosome;preribosome, large subunit precursor;macromolecular complex;organelle;membrane-bounded organelle;intracellular organelle;intracellular membrane-bounded organelle;intracellular part;cell part	nucleobase-containing compound metabolic process;rRNA processing;RNA processing;one-carbon metabolic process;nitrogen compound metabolic process;metabolic process;RNA modification;cellular process;RNA metabolic process;cellular nitrogen compound metabolic process;macromolecule metabolic process;macromolecule modification;cellular metabolic process;primary metabolic process;small molecule metaboli…	nucleus;ribonucleoprotein complex;preribosome;macromolecular complex;organelle;intracellular organelle;intracellular membrane-bounded organelle;cell part		Nol1_Nop2_Fmu		Completeproteome;Referenceproteome		GO:0000154;GO:0000463;GO:0000470;GO:0001510;GO:0006139;GO:0006364;GO:0006396;GO:0006730;GO:0006807;GO:0008152;GO:0009451;GO:0009987;GO:0016070;GO:0016072;GO:0031167;GO:0032259;GO:0034470;GO:0034641;GO:0034660;GO:0043170;GO:0043412;GO:0043414;GO:0044237;GO:0044238;GO:0044260;GO:0044281;GO:0070475;GO:0090304	GO:0003676;GO:0003723;GO:0003824;GO:0005488;GO:0008168;GO:0008169;GO:0008173;GO:0008649;GO:0008757;GO:0009383;GO:0016434;GO:0016740;GO:0016741	GO:0005634;GO:0030529;GO:0030684;GO:0030687;GO:0032991;GO:0043226;GO:0043227;GO:0043229;GO:0043231;GO:0044424;GO:0044464	GO:0006139;GO:0006364;GO:0006396;GO:0006730;GO:0006807;GO:0008152;GO:0009451;GO:0009987;GO:0016070;GO:0034641;GO:0043170;GO:0043412;GO:0044237;GO:0044238;GO:0044281	GO:0005634;GO:0030529;GO:0030684;GO:0032991;GO:0043226;GO:0043229;GO:0043231;GO:0044464	CADANIAG00004099	CADANIAP00004099	CADANIAT00004099				IPR018314;IPR001678;IPR011023;IPR023267;IPR023273;IPR029063	Fmu/NOL1/Nop2p_CS;MeTrfase_RsmB/NOP2;Nop2p;RCMT;RCMT_NOP2;SAM-dependent_MTases					PF01189	PR02008;PR02012	RCMTFAMILY;RCMTNOP2	PS01153;PS51686	NOL1_NOP2_SUN;SAM_MT_RSMB_NOP						Emericella nidulans (strain FGSC A4 / ATCC 38163 / CBS 112.46 / NRRL 194 / M139)	Q5AUF7_EMENI			COG0144
Q5BBX3;C8VL29	+	nucleobase-containing compound metabolic process;RNA processing;nitrogen compound metabolic process;metabolic process;cellular process;RNA metabolic process;cellular nitrogen compound metabolic process;macromolecule metabolic process;cellular metabolic process;primary metabolic process;cellular macromolecule metabolic process;nucleic acid metabolic process	nucleic acid binding;RNA binding;catalytic activity;binding;methyltransferase activity;N-methyltransferase activity;RNA methyltransferase activity;rRNA methyltransferase activity;S-adenosylmethionine-dependent methyltransferase activity;rRNA (guanine-N1-)-methyltransferase activity;rRNA (guanine) methyltransferase activity;transferase activity;transferase activity, transferring one-carbon groups	mitochondrion;endoplasmic reticulum;organelle;membrane-bounded organelle;intracellular organelle;intracellular membrane-bounded organelle;intracellular part;cytoplasmic part;cell part	nucleobase-containing compound metabolic process;RNA processing;nitrogen compound metabolic process;metabolic process;cellular process;RNA metabolic process;cellular nitrogen compound metabolic process;macromolecule metabolic process;cellular metabolic process;primary metabolic process	mitochondrion;endoplasmic reticulum;organelle;intracellular organelle;intracellular membrane-bounded organelle;cell part		SpoU_methylase;SpoU_sub_bind		Completeproteome;Referenceproteome		GO:0006139;GO:0006396;GO:0006807;GO:0008152;GO:0009987;GO:0016070;GO:0034641;GO:0043170;GO:0044237;GO:0044238;GO:0044260;GO:0090304	GO:0003676;GO:0003723;GO:0003824;GO:0005488;GO:0008168;GO:0008170;GO:0008173;GO:0008649;GO:0008757;GO:0008989;GO:0016435;GO:0016740;GO:0016741	GO:0005739;GO:0005783;GO:0043226;GO:0043227;GO:0043229;GO:0043231;GO:0044424;GO:0044444;GO:0044464	GO:0006139;GO:0006396;GO:0006807;GO:0008152;GO:0009987;GO:0016070;GO:0034641;GO:0043170;GO:0044237;GO:0044238	GO:0005739;GO:0005783;GO:0043226;GO:0043229;GO:0043231;GO:0044464	CADANIAG00008617	CADANIAP00008617	CADANIAT00008617				IPR029028;IPR029064;IPR001537;IPR013123;IPR029026	Alpha/beta_knot_MTases;L30e-like;SpoU_MeTrfase;SpoU_subst-bd;tRNA_m1G_MTases_N					PF00588;PF08032								SM00967	SpoU_sub_bind	Emericella nidulans (strain FGSC A4 / ATCC 38163 / CBS 112.46 / NRRL 194 / M139)	Q5BBX3_EMENI			COG0566
Q5BET5	+							Methyltransf_16;VPS28														AN0945.2	IPR019410;IPR029063;IPR007143;IPR017899;IPR017898	Nicotinamide_N-MeTfrase-like;SAM-dependent_MTases;VPS28;VPS28_C;VPS28_N					PF10294;PF03997			PS51310;PS51313	VPS28_C;VPS28_N						Emericella nidulans (strain FGSC A4 / ATCC 38163 / CBS 112.46 / NRRL 194 / M139)	Q5BET5_EMENI			COG0500
Q5ASW4	+																					AN8616.2	IPR029063	SAM-dependent_MTases															Emericella nidulans (strain FGSC A4 / ATCC 38163 / CBS 112.46 / NRRL 194 / M139)	Q5ASW4_EMENI
Q5AR54;C8VJQ5	+		catalytic activity					AMP-binding;AMP-binding_C;Condensation;PP-binding		Completeproteome;Phosphopantetheine;Referenceproteome			GO:0003824				CADANIAG00009366	CADANIAP00009366	CADANIAT00009366				IPR010071;IPR009081;IPR025110;IPR020845;IPR000873;IPR001242;IPR006162;IPR029063	AA_adenyl_domain;Acyl_carrier_prot-like;AMP-bd_C;AMP-binding_CS;AMP-dep_Synth/Lig;Condensatn;Ppantetheine_attach_site;SAM-dependent_MTases					PF00501;PF13193;PF00668;PF00550			PS50075;PS00455;PS00012	ACP_DOMAIN;AMP_BINDING;PHOSPHOPANTETHEINE						Emericella nidulans (strain FGSC A4 / ATCC 38163 / CBS 112.46 / NRRL 194 / M139)	Q5AR54_EMENI			COG1020
Q5B4A5;C8V7R1	+	one-carbon metabolic process;metabolic process;cellular process;methylation;cellular metabolic process;small molecule metabolic process	catalytic activity;methyltransferase activity;S-adenosylmethionine-dependent methyltransferase activity;transferase activity;transferase activity, transferring one-carbon groups;arsenite methyltransferase activity	cytoplasm;cytosol;intracellular part;cytoplasmic part;cell part	one-carbon metabolic process;metabolic process;cellular process;cellular metabolic process;small molecule metabolic process	cytoplasm;cytosol;cell part		Methyltransf_31		Completeproteome;Referenceproteome		GO:0006730;GO:0008152;GO:0009987;GO:0032259;GO:0044237;GO:0044281	GO:0003824;GO:0008168;GO:0008757;GO:0016740;GO:0016741;GO:0030791	GO:0005737;GO:0005829;GO:0044424;GO:0044444;GO:0044464	GO:0006730;GO:0008152;GO:0009987;GO:0044237;GO:0044281	GO:0005737;GO:0005829;GO:0044464	CADANIAG00005808	CADANIAP00005808	CADANIAT00005808				IPR026669;IPR025714;IPR029063	Arsenite_MeTrfase;Methyltranfer_dom;SAM-dependent_MTases					PF13847										Emericella nidulans (strain FGSC A4 / ATCC 38163 / CBS 112.46 / NRRL 194 / M139)	Q5B4A5_EMENI			COG0500
Q5B215;C8VGK8	+		catalytic activity;methyltransferase activity;O-methyltransferase activity;transferase activity;transferase activity, transferring one-carbon groups					Methyltransf_2		Completeproteome;Referenceproteome;S-adenosyl-L-methionine			GO:0003824;GO:0008168;GO:0008171;GO:0016740;GO:0016741				CADANIAG00003677	CADANIAP00003677	CADANIAT00003677				IPR016461;IPR001077;IPR029063;IPR011991	O-MeTrfase_COMT;O_MeTrfase_2;SAM-dependent_MTases;WHTH_DNA-bd_dom					PF00891			PS51683	SAM_OMT_II						Emericella nidulans (strain FGSC A4 / ATCC 38163 / CBS 112.46 / NRRL 194 / M139)	Q5B215_EMENI			NOG244975
Q5B989;C8VJ92	+	one-carbon metabolic process;metabolic process;cellular process;methylation;cellular metabolic process;small molecule metabolic process	catalytic activity;methyltransferase activity;S-adenosylmethionine-dependent methyltransferase activity;transferase activity;transferase activity, transferring one-carbon groups	cytoplasm;intracellular part;cell part	one-carbon metabolic process;metabolic process;cellular process;cellular metabolic process;small molecule metabolic process	cytoplasm;cell part				Completeproteome;Referenceproteome		GO:0006730;GO:0008152;GO:0009987;GO:0032259;GO:0044237;GO:0044281	GO:0003824;GO:0008168;GO:0008757;GO:0016740;GO:0016741	GO:0005737;GO:0044424;GO:0044464	GO:0006730;GO:0008152;GO:0009987;GO:0044237;GO:0044281	GO:0005737;GO:0044464	CADANIAG00010198	CADANIAP00010198	CADANIAT00010198				IPR029063	SAM-dependent_MTases															Emericella nidulans (strain FGSC A4 / ATCC 38163 / CBS 112.46 / NRRL 194 / M139)	Q5B989_EMENI			NOG319369
Q5B3W6	+		catalytic activity;methyltransferase activity;N-methyltransferase activity;protein methyltransferase activity;S-adenosylmethionine-dependent methyltransferase activity;lysine N-methyltransferase activity;protein-lysine N-methyltransferase activity;transferase activity;transferase activity, transferring one-carbon groups;histone-lysine N-methyltransferase activity;histone methyltransferase activity	nucleus;organelle;membrane-bounded organelle;intracellular organelle;intracellular membrane-bounded organelle;intracellular part;cell part		nucleus;organelle;intracellular organelle;intracellular membrane-bounded organelle;cell part	Lysine degradation;Tight junction	SET		Methyltransferase;Nucleus;S-adenosyl-L-methionine;Transferase			GO:0003824;GO:0008168;GO:0008170;GO:0008276;GO:0008757;GO:0016278;GO:0016279;GO:0016740;GO:0016741;GO:0018024;GO:0042054	GO:0005634;GO:0043226;GO:0043227;GO:0043229;GO:0043231;GO:0044424;GO:0044464		GO:0005634;GO:0043226;GO:0043229;GO:0043231;GO:0044464						AN4764.2	IPR006560;IPR003616;IPR001214	AWS_dom;Post-SET_dom;SET_dom	ko00310;ko04530				PF00856			PS51215;PS50868;PS50280	AWS;POST_SET;SET	Histone-lysine N-methyltransferase			SM00508;SM00317	PostSET;SET	Emericella nidulans (strain FGSC A4 / ATCC 38163 / CBS 112.46 / NRRL 194 / M139)	Q5B3W6_EMENI		2.1.1.43	COG2940
C8UZY5	+	cellular process;ribonucleoprotein complex biogenesis;ribosomal large subunit biogenesis;cellular component biogenesis;cellular component organization or biogenesis;cellular component organization or biogenesis at cellular level;cellular component biogenesis at cellular level	catalytic activity;methyltransferase activity;RNA methyltransferase activity;rRNA methyltransferase activity;S-adenosylmethionine-dependent methyltransferase activity;rRNA (adenine) methyltransferase activity;transferase activity;transferase activity, transferring one-carbon groups	nucleolus;organelle;non-membrane-bounded organelle;intracellular organelle;intracellular non-membrane-bounded organelle;organelle part;intracellular part;nuclear part;intracellular organelle part;cell part	cellular process;ribosomal large subunit biogenesis	nucleolus;organelle;intracellular organelle;intracellular non-membrane-bounded organelle;cell part		Methyltransf_8		Completeproteome;Referenceproteome		GO:0009987;GO:0022613;GO:0042273;GO:0044085;GO:0071840;GO:0071841;GO:0071843	GO:0003824;GO:0008168;GO:0008173;GO:0008649;GO:0008757;GO:0016433;GO:0016740;GO:0016741	GO:0005730;GO:0043226;GO:0043228;GO:0043229;GO:0043232;GO:0044422;GO:0044424;GO:0044428;GO:0044446;GO:0044464	GO:0009987;GO:0042273	GO:0005730;GO:0043226;GO:0043229;GO:0043232;GO:0044464	CADANIAG00007167	CADANIAP00007167	CADANIAT00007167			ANIA_05871	IPR007823;IPR029063	Methyltransferase-rel;SAM-dependent_MTases					PF05148										Emericella nidulans (strain FGSC A4 / ATCC 38163 / CBS 112.46 / NRRL 194 / M139)	C8UZY5_EMENI
Q5AR47;C8VJP6	+		catalytic activity;methyltransferase activity;O-methyltransferase activity;transferase activity;transferase activity, transferring one-carbon groups					Methyltransf_2		Completeproteome;Referenceproteome;S-adenosyl-L-methionine			GO:0003824;GO:0008168;GO:0008171;GO:0016740;GO:0016741				CADANIAG00009357	CADANIAP00009357	CADANIAT00009357				IPR016461;IPR001077;IPR029063;IPR011991	O-MeTrfase_COMT;O_MeTrfase_2;SAM-dependent_MTases;WHTH_DNA-bd_dom					PF00891			PS51683	SAM_OMT_II						Emericella nidulans (strain FGSC A4 / ATCC 38163 / CBS 112.46 / NRRL 194 / M139)	Q5AR47_EMENI			NOG249961
Q5B036;C8V2L2	+		catalytic activity;methyltransferase activity;S-adenosylmethionine-dependent methyltransferase activity;transferase activity;transferase activity, transferring one-carbon groups					TPMT		Completeproteome;Referenceproteome			GO:0003824;GO:0008168;GO:0008757;GO:0016740;GO:0016741				CADANIAG00006920	CADANIAP00006920	CADANIAT00006920				IPR029063;IPR008854	SAM-dependent_MTases;TPMT					PF05724			PS51585	SAM_MT_TPMT						Emericella nidulans (strain FGSC A4 / ATCC 38163 / CBS 112.46 / NRRL 194 / M139)	Q5B036_EMENI			NOG126998
Q5B720	+		tRNA binding;nucleic acid binding;RNA binding;catalytic activity;binding;methyltransferase activity;RNA methyltransferase activity;tRNA methyltransferase activity;tRNA (guanine-N7-)-methyltransferase activity;S-adenosylmethionine-dependent methyltransferase activity;tRNA (guanine) methyltransferase activity;transferase activity;transferase activity, transferring one-carbon groups	nucleus;organelle;membrane-bounded organelle;intracellular organelle;intracellular membrane-bounded organelle;intracellular part;cell part		nucleus;organelle;intracellular organelle;intracellular membrane-bounded organelle;cell part		BRCT;Methyltransf_4;PTCB-BRCT		Methyltransferase;Nucleus;RNA-binding;S-adenosyl-L-methionine;Transferase;tRNA-binding;tRNAprocessing			GO:0000049;GO:0003676;GO:0003723;GO:0003824;GO:0005488;GO:0008168;GO:0008173;GO:0008175;GO:0008176;GO:0008757;GO:0016423;GO:0016740;GO:0016741	GO:0005634;GO:0043226;GO:0043227;GO:0043229;GO:0043231;GO:0044424;GO:0044464		GO:0005634;GO:0043226;GO:0043229;GO:0043231;GO:0044464						AN3660.2	IPR001357;IPR029063;IPR025763;IPR003358	BRCT_dom;SAM-dependent_MTases;Trm8_euk;tRNA_(Gua-N-7)_MeTrfase_Trmb					PF00533;PF02390;PF12738			PS50172;PS51625	BRCT;SAM_MT_TRMB	tRNA (guanine(46)-N(7))-methyltransferase			SM00292	BRCT	Emericella nidulans (strain FGSC A4 / ATCC 38163 / CBS 112.46 / NRRL 194 / M139)	Q5B720_EMENI		2.1.1.33	COG0220
C8VAQ8	+		catalytic activity;methyltransferase activity;N-methyltransferase activity;protein methyltransferase activity;S-adenosylmethionine-dependent methyltransferase activity;lysine N-methyltransferase activity;protein-lysine N-methyltransferase activity;transferase activity;transferase activity, transferring one-carbon groups;histone-lysine N-methyltransferase activity;histone methyltransferase activity	nucleus;organelle;membrane-bounded organelle;intracellular organelle;intracellular membrane-bounded organelle;intracellular part;cell part		nucleus;organelle;intracellular organelle;intracellular membrane-bounded organelle;cell part		SET		Completeproteome;Methyltransferase;Nucleus;Referenceproteome;S-adenosyl-L-methionine;Transferase			GO:0003824;GO:0008168;GO:0008170;GO:0008276;GO:0008757;GO:0016278;GO:0016279;GO:0016740;GO:0016741;GO:0018024;GO:0042054	GO:0005634;GO:0043226;GO:0043227;GO:0043229;GO:0043231;GO:0044424;GO:0044464		GO:0005634;GO:0043226;GO:0043229;GO:0043231;GO:0044464	CADANIAG00005662	CADANIAP00005662	CADANIAT00005662			ANIA_04764	IPR006560;IPR003616;IPR001214	AWS_dom;Post-SET_dom;SET_dom					PF00856			PS51215;PS50868;PS50280	AWS;POST_SET;SET	Histone-lysine N-methyltransferase			SM00508;SM00317	PostSET;SET	Emericella nidulans (strain FGSC A4 / ATCC 38163 / CBS 112.46 / NRRL 194 / M139)	C8VAQ8_EMENI		2.1.1.43
Q5BCH9	+	RNA methylation;tRNA nucleoside ribose methylation;cytoplasmic translation;nucleobase-containing compound metabolic process;RNA processing;tRNA metabolic process;tRNA modification;translation;one-carbon metabolic process;nitrogen compound metabolic process;tRNA processing;metabolic process;biosynthetic process;macromolecule biosynthetic process;RNA modification;cellular process;RNA metabolic proc…	catalytic activity;methyltransferase activity;RNA methyltransferase activity;tRNA methyltransferase activity;transferase activity;transferase activity, transferring one-carbon groups	cytoplasm;intracellular part;cell part	cytoplasmic translation;nucleobase-containing compound metabolic process;RNA processing;tRNA metabolic process;translation;one-carbon metabolic process;nitrogen compound metabolic process;tRNA processing;metabolic process;biosynthetic process;RNA modification;cellular process;RNA metabolic process;protein metabolic process;cellular nitrogen compound metabolic process;macromolecule metabolic proce…	cytoplasm;cell part		FtsJ		Cytoplasm;Methyltransferase;S-adenosyl-L-methionine;Transferase;tRNAprocessing		GO:0001510;GO:0002128;GO:0002181;GO:0006139;GO:0006396;GO:0006399;GO:0006400;GO:0006412;GO:0006730;GO:0006807;GO:0008033;GO:0008152;GO:0009058;GO:0009059;GO:0009451;GO:0009987;GO:0016070;GO:0019538;GO:0030488;GO:0032259;GO:0034470;GO:0034641;GO:0034645;GO:0034660;GO:0043170;GO:0043412;GO:0043414;GO:0044237;GO:0044238;GO:0044249;GO:0044260;GO:0044267;GO:0044281;GO:0090304	GO:0003824;GO:0008168;GO:0008173;GO:0008175;GO:0016740;GO:0016741	GO:0005737;GO:0044424;GO:0044464	GO:0002181;GO:0006139;GO:0006396;GO:0006399;GO:0006412;GO:0006730;GO:0006807;GO:0008033;GO:0008152;GO:0009058;GO:0009451;GO:0009987;GO:0016070;GO:0019538;GO:0034641;GO:0043170;GO:0043412;GO:0044237;GO:0044238;GO:0044281	GO:0005737;GO:0044464						AN1751.2	IPR028590;IPR015507;IPR002877;IPR029063	RNA_methyltr_E_Trm7;rRNA-MeTfrase_E;rRNA_MeTrfase_FtsJ_dom;SAM-dependent_MTases					PF01728					Putative tRNA (cytidine(32)/guanosine(34)-2'-O)-methyltransferase					Emericella nidulans (strain FGSC A4 / ATCC 38163 / CBS 112.46 / NRRL 194 / M139)	Q5BCH9_EMENI		2.1.1.205	COG0293
Q5AT49	+		catalytic activity;methyltransferase activity;transferase activity;transferase activity, transferring one-carbon groups					Methyltransf_11					GO:0003824;GO:0008168;GO:0016740;GO:0016741									AN8531.2	IPR013216;IPR029063	Methyltransf_11;SAM-dependent_MTases					PF08241										Emericella nidulans (strain FGSC A4 / ATCC 38163 / CBS 112.46 / NRRL 194 / M139)	Q5AT49_EMENI			COG0500
Q5AWV6	+		catalytic activity;methyltransferase activity;S-adenosylmethionine-dependent methyltransferase activity;transferase activity;transferase activity, transferring one-carbon groups;trans-aconitate 2-methyltransferase activity					SET					GO:0003824;GO:0008168;GO:0008757;GO:0016740;GO:0016741;GO:0030798									AN7224.2	IPR029063;IPR001214;IPR023149	SAM-dependent_MTases;SET_dom;Trans_acon_MeTrfase_C					PF00856			PS50280	SET				SM00317	SET	Emericella nidulans (strain FGSC A4 / ATCC 38163 / CBS 112.46 / NRRL 194 / M139)	Q5AWV6_EMENI			NOG261986
Q5BFJ5;C8VRQ7	+	rRNA modification;RNA methylation;nucleobase-containing compound metabolic process;rRNA processing;RNA processing;one-carbon metabolic process;nitrogen compound metabolic process;metabolic process;RNA modification;cellular process;RNA metabolic process;rRNA metabolic process;rRNA methylation;methylation;ncRNA processing;cellular nitrogen compound metabolic process;ncRNA metabolic process;macromol…	catalytic activity;methyltransferase activity;N-methyltransferase activity;RNA methyltransferase activity;rRNA methyltransferase activity;S-adenosylmethionine-dependent methyltransferase activity;rRNA (uridine) methyltransferase activity;transferase activity;transferase activity, transferring one-carbon groups;rRNA (uridine-N3-)-methyltransferase activity	cytoplasm;intracellular part;cell part	nucleobase-containing compound metabolic process;rRNA processing;RNA processing;one-carbon metabolic process;nitrogen compound metabolic process;metabolic process;RNA modification;cellular process;RNA metabolic process;cellular nitrogen compound metabolic process;macromolecule metabolic process;macromolecule modification;cellular metabolic process;primary metabolic process;small molecule metaboli…	cytoplasm;cell part		DUF3115		Completeproteome;Referenceproteome		GO:0000154;GO:0001510;GO:0006139;GO:0006364;GO:0006396;GO:0006730;GO:0006807;GO:0008152;GO:0009451;GO:0009987;GO:0016070;GO:0016072;GO:0031167;GO:0032259;GO:0034470;GO:0034641;GO:0034660;GO:0043170;GO:0043412;GO:0043414;GO:0044237;GO:0044238;GO:0044260;GO:0044281;GO:0070475;GO:0090304	GO:0003824;GO:0008168;GO:0008170;GO:0008173;GO:0008649;GO:0008757;GO:0016436;GO:0016740;GO:0016741;GO:0070042	GO:0005737;GO:0044424;GO:0044464	GO:0006139;GO:0006364;GO:0006396;GO:0006730;GO:0006807;GO:0008152;GO:0009451;GO:0009987;GO:0016070;GO:0034641;GO:0043170;GO:0043412;GO:0044237;GO:0044238;GO:0044281	GO:0005737;GO:0044464	CADANIAG00001985	CADANIAP00001985	CADANIAT00001985				IPR021463	DUF3115					PF11312										Emericella nidulans (strain FGSC A4 / ATCC 38163 / CBS 112.46 / NRRL 194 / M139)	Q5BFJ5_EMENI			NOG38887
Q5B0Q6	+		catalytic activity;methyltransferase activity;RNA methyltransferase activity;tRNA methyltransferase activity;tRNA (guanine-N7-)-methyltransferase activity;S-adenosylmethionine-dependent methyltransferase activity;tRNA (guanine) methyltransferase activity;transferase activity;transferase activity, transferring one-carbon groups					Methyltransf_4					GO:0003824;GO:0008168;GO:0008173;GO:0008175;GO:0008176;GO:0008757;GO:0016423;GO:0016740;GO:0016741									AN5874.2	IPR029063;IPR003358	SAM-dependent_MTases;tRNA_(Gua-N-7)_MeTrfase_Trmb					PF02390										Emericella nidulans (strain FGSC A4 / ATCC 38163 / CBS 112.46 / NRRL 194 / M139)	Q5B0Q6_EMENI			NOG114381
Q5ASY6	+		catalytic activity;oxidoreductase activity					Methyltransf_33;TauD					GO:0003824;GO:0016491									AN8594.2	IPR019257;IPR017805;IPR003819	MeTrfase_dom;SAM_MeTrfase_EsaF-type_put;Taurine_dOase					PF10017;PF02668										Emericella nidulans (strain FGSC A4 / ATCC 38163 / CBS 112.46 / NRRL 194 / M139)	Q5ASY6_EMENI			COG2175
Q5ARY5	+																					AN8945.2	IPR029063	SAM-dependent_MTases															Emericella nidulans (strain FGSC A4 / ATCC 38163 / CBS 112.46 / NRRL 194 / M139)	Q5ARY5_EMENI
Q5AYR2;C8V0V1	+		catalytic activity;methyltransferase activity;N-methyltransferase activity;protein methyltransferase activity;S-adenosylmethionine-dependent methyltransferase activity;lysine N-methyltransferase activity;protein-lysine N-methyltransferase activity;transferase activity;transferase activity, transferring one-carbon groups	nucleus;organelle;membrane-bounded organelle;intracellular organelle;intracellular membrane-bounded organelle;intracellular part;cell part		nucleus;organelle;intracellular organelle;intracellular membrane-bounded organelle;cell part		Rubis-subs-bind;SET		Completeproteome;Referenceproteome			GO:0003824;GO:0008168;GO:0008170;GO:0008276;GO:0008757;GO:0016278;GO:0016279;GO:0016740;GO:0016741	GO:0005634;GO:0043226;GO:0043227;GO:0043229;GO:0043231;GO:0044424;GO:0044464		GO:0005634;GO:0043226;GO:0043229;GO:0043231;GO:0044464	CADANIAG00007342	CADANIAP00007342	CADANIAT00007342				IPR015353;IPR001214	Rubisco_LSMT_subst-bd;SET_dom					PF09273;PF00856			PS50280	SET				SM00317	SET	Emericella nidulans (strain FGSC A4 / ATCC 38163 / CBS 112.46 / NRRL 194 / M139)	Q5AYR2_EMENI			NOG318651
Q5BAN2;C8VNQ5	+		catalytic activity;methyltransferase activity;O-methyltransferase activity;transferase activity;transferase activity, transferring one-carbon groups					Methyltransf_2		Completeproteome;Referenceproteome;S-adenosyl-L-methionine			GO:0003824;GO:0008168;GO:0008171;GO:0016740;GO:0016741				CADANIAG00009101	CADANIAP00009101	CADANIAT00009101				IPR016461;IPR001077;IPR029063;IPR011991	O-MeTrfase_COMT;O_MeTrfase_2;SAM-dependent_MTases;WHTH_DNA-bd_dom					PF00891			PS51683	SAM_OMT_II						Emericella nidulans (strain FGSC A4 / ATCC 38163 / CBS 112.46 / NRRL 194 / M139)	Q5BAN2_EMENI			NOG240286
Q5B0B7;C8V334	+									Completeproteome;Referenceproteome							CADANIAG00007006	CADANIAP00007006	CADANIAT00007006				IPR029063	SAM-dependent_MTases															Emericella nidulans (strain FGSC A4 / ATCC 38163 / CBS 112.46 / NRRL 194 / M139)	Q5B0B7_EMENI			NOG46070
C8VCZ0	+	one-carbon metabolic process;metabolic process;cellular process;methylation;cellular metabolic process;small molecule metabolic process	catalytic activity;methyltransferase activity;S-adenosylmethionine-dependent methyltransferase activity;transferase activity;transferase activity, transferring one-carbon groups;trans-aconitate 2-methyltransferase activity	cytoplasm;intracellular part;cell part	one-carbon metabolic process;metabolic process;cellular process;cellular metabolic process;small molecule metabolic process	cytoplasm;cell part				Completeproteome;Referenceproteome		GO:0006730;GO:0008152;GO:0009987;GO:0032259;GO:0044237;GO:0044281	GO:0003824;GO:0008168;GO:0008757;GO:0016740;GO:0016741;GO:0030798	GO:0005737;GO:0044424;GO:0044464	GO:0006730;GO:0008152;GO:0009987;GO:0044237;GO:0044281	GO:0005737;GO:0044464	CADANIAG00000222	CADANIAP00000222	CADANIAT00000222			ANIA_10909	IPR029063;IPR023149	SAM-dependent_MTases;Trans_acon_MeTrfase_C															Emericella nidulans (strain FGSC A4 / ATCC 38163 / CBS 112.46 / NRRL 194 / M139)	C8VCZ0_EMENI
Q5ATJ6	+																					AN8384.2	IPR029063	SAM-dependent_MTases															Emericella nidulans (strain FGSC A4 / ATCC 38163 / CBS 112.46 / NRRL 194 / M139)	Q5ATJ6_EMENI			NOG325432
Q5ARI2	+							Methyltransf_16														AN9098.2	IPR019410;IPR029063	Nicotinamide_N-MeTfrase-like;SAM-dependent_MTases					PF10294										Emericella nidulans (strain FGSC A4 / ATCC 38163 / CBS 112.46 / NRRL 194 / M139)	Q5ARI2_EMENI			NOG282436
Q5BBP5;C8VLG3	+		catalytic activity;binding;zinc ion binding;oxidoreductase activity;transferase activity;ion binding;cation binding;metal ion binding;transition metal ion binding					Acyl_transf_1;ADH_zinc_N;ketoacyl-synt;Ketoacyl-synt_C;KR;PP-binding;PS-DH		Completeproteome;Phosphopantetheine;Referenceproteome			GO:0003824;GO:0005488;GO:0008270;GO:0016491;GO:0016740;GO:0043167;GO:0043169;GO:0046872;GO:0046914				CADANIAG00008703	CADANIAP00008703	CADANIAT00008703				IPR001227;IPR009081;IPR014043;IPR016035;IPR013149;IPR011032;IPR014031;IPR014030;IPR016036;IPR016040;IPR020801;IPR020841;IPR020807;IPR020843;IPR013968;IPR006162;IPR029063;IPR016039;IPR016038	Ac_transferase_dom;Acyl_carrier_prot-like;Acyl_transferase;Acyl_Trfase/lysoPLipase;ADH_C;GroES-like;Ketoacyl_synth_C;Ketoacyl_synth_N;Malonyl_transacylase_ACP-bd;NAD(P)-bd_dom;PKS_acyl_transferase;PKS_Beta-ketoAc_synthase_dom;PKS_dehydratase;PKS_ER;PKS_KR;Ppantetheine_attach_site;SAM-dependent_MTases;Thiolase-like;Thiolase-like_subgr					PF00698;PF00107;PF00109;PF02801;PF08659;PF00550;PF14765			PS50075;PS00012	ACP_DOMAIN;PHOSPHOPANTETHEINE				SM00827;SM00826;SM00829;SM00822;SM00825	PKS_AT;PKS_DH;PKS_ER;PKS_KR;PKS_KS	Emericella nidulans (strain FGSC A4 / ATCC 38163 / CBS 112.46 / NRRL 194 / M139)	Q5BBP5_EMENI			COG3321
Q5B214;C8VGK7	+	one-carbon metabolic process;metabolic process;cellular process;methylation;cellular metabolic process;small molecule metabolic process	catalytic activity;methyltransferase activity;S-adenosylmethionine-dependent methyltransferase activity;transferase activity;transferase activity, transferring one-carbon groups	cytoplasm;intracellular part;cell part	one-carbon metabolic process;metabolic process;cellular process;cellular metabolic process;small molecule metabolic process	cytoplasm;cell part				Completeproteome;Referenceproteome		GO:0006730;GO:0008152;GO:0009987;GO:0032259;GO:0044237;GO:0044281	GO:0003824;GO:0008168;GO:0008757;GO:0016740;GO:0016741	GO:0005737;GO:0044424;GO:0044464	GO:0006730;GO:0008152;GO:0009987;GO:0044237;GO:0044281	GO:0005737;GO:0044464	CADANIAG00003676	CADANIAP00003676	CADANIAT00003676				IPR029063	SAM-dependent_MTases															Emericella nidulans (strain FGSC A4 / ATCC 38163 / CBS 112.46 / NRRL 194 / M139)	Q5B214_EMENI
G5EAU1;C8VRQ5	+	cellular biogenic amine metabolic process;polyamine metabolic process;polyamine biosynthetic process;nitrogen compound metabolic process;metabolic process;spermidine metabolic process;spermidine biosynthetic process;biosynthetic process;amine metabolic process;amine biosynthetic process;cellular process;cellular nitrogen compound metabolic process;cellular biogenic amine biosynthetic process;cell…	catalytic activity;transferase activity	extracellular region;cytosol;intracellular part;cytoplasmic part;cell part	nitrogen compound metabolic process;metabolic process;biosynthetic process;amine metabolic process;cellular process;cellular nitrogen compound metabolic process;cellular metabolic process	extracellular region;cytosol;cell part	Cysteine and methionine metabolism;Arginine and proline metabolism;beta-Alanine metabolism;Glutathione metabolism	Spermine_synth		Completeproteome;Referenceproteome;Transferase		GO:0006576;GO:0006595;GO:0006596;GO:0006807;GO:0008152;GO:0008216;GO:0008295;GO:0009058;GO:0009308;GO:0009309;GO:0009987;GO:0034641;GO:0042401;GO:0044106;GO:0044237;GO:0044249;GO:0044271	GO:0003824;GO:0016740	GO:0005576;GO:0005829;GO:0044424;GO:0044444;GO:0044464	GO:0006807;GO:0008152;GO:0009058;GO:0009308;GO:0009987;GO:0034641;GO:0044237	GO:0005576;GO:0005829;GO:0044464	CADANIAG00001983	CADANIAP00001983	CADANIAT00001983				IPR030374;IPR030373;IPR029063;IPR001045;IPR030668	PABS;PABS_CS;SAM-dependent_MTases;Spermi_synthase;Spermi_synthase_euk	ko00270;ko00330;ko00410;ko00480				PF01564			PS01330;PS51006	PABS_1;PABS_2						Emericella nidulans (strain FGSC A4 / ATCC 38163 / CBS 112.46 / NRRL 194 / M139)	G5EAU1_EMENI
Q5AR57;C8VJQ8	+		catalytic activity;methyltransferase activity;O-methyltransferase activity;transferase activity;transferase activity, transferring one-carbon groups					Methyltransf_2		Completeproteome;Referenceproteome;S-adenosyl-L-methionine			GO:0003824;GO:0008168;GO:0008171;GO:0016740;GO:0016741				CADANIAG00009369	CADANIAP00009369	CADANIAT00009369				IPR016461;IPR001077;IPR029063	O-MeTrfase_COMT;O_MeTrfase_2;SAM-dependent_MTases					PF00891			PS51683	SAM_OMT_II						Emericella nidulans (strain FGSC A4 / ATCC 38163 / CBS 112.46 / NRRL 194 / M139)	Q5AR57_EMENI			NOG272168
Q5BBT1	+	coenzyme metabolic process;oxidoreduction coenzyme metabolic process;ubiquinone metabolic process;ubiquinone biosynthetic process;metabolic process;biosynthetic process;coenzyme biosynthetic process;cellular process;cellular ketone metabolic process;quinone cofactor metabolic process;cellular metabolic process;cellular biosynthetic process;small molecule metabolic process;quinone cofactor biosynt…	catalytic activity;methyltransferase activity;C-methyltransferase activity;2-polyprenyl-6-methoxy-1,4-benzoquinone methyltransferase activity;transferase activity;transferase activity, transferring one-carbon groups;quinone cofactor methyltransferase activity		metabolic process;biosynthetic process;cellular process;cellular ketone metabolic process;cellular metabolic process;small molecule metabolic process;cofactor metabolic process				ALCOHOL_METABOLIC_PROCESS;BIOSYNTHETIC_PROCESS;CASORELLI_ACUTE_PROMYELOCYTIC_LEUKEMIA_DN;CELLULAR_BIOSYNTHETIC_PROCESS;chr6q21;COENZYME_BIOSYNTHETIC_PROCESS;COENZYME_METABOLIC_PROCESS;COFACTOR_BIOSYNTHETIC_PROCESS;COFACTOR_METABOLIC_PROCESS;GEORGES_TARGETS_OF_MIR192_AND_MIR215;GOBERT_OLIGODENDROCYTE_DIFFERENTIATION_DN;GRAESSMANN_APOPTOSIS_BY_DOXORUBICIN_DN;GRAESSMANN_RESPONSE_TO_MC_AND_DOXORUBICI…	Membrane;Methyltransferase;Mitochondrion;Mitochondrioninnermembrane;S-adenosyl-L-methionine;Transferase;Transitpeptide;Ubiquinonebiosynthesis		GO:0006732;GO:0006733;GO:0006743;GO:0006744;GO:0008152;GO:0009058;GO:0009108;GO:0009987;GO:0042180;GO:0042375;GO:0044237;GO:0044249;GO:0044281;GO:0045426;GO:0051186;GO:0051188	GO:0003824;GO:0008168;GO:0008169;GO:0008425;GO:0016740;GO:0016741;GO:0030580		GO:0008152;GO:0009058;GO:0009987;GO:0042180;GO:0044237;GO:0044281;GO:0051186							COQ3	IPR029063;IPR010233	SAM-dependent_MTases;UbiG_MeTrfase										Ubiquinone biosynthesis O-methyltransferase, mitochondrial					Emericella nidulans (strain FGSC A4 / ATCC 38163 / CBS 112.46 / NRRL 194 / M139)	Q5BBT1_EMENI			COG2227
Q5B4I7	+		catalytic activity;methyltransferase activity;transferase activity;transferase activity, transferring one-carbon groups										GO:0003824;GO:0008168;GO:0016740;GO:0016741									AN4543.2	IPR029063;IPR026635	SAM-dependent_MTases;See1-like															Emericella nidulans (strain FGSC A4 / ATCC 38163 / CBS 112.46 / NRRL 194 / M139)	Q5B4I7_EMENI			NOG308330
Q5AZ32;C8V0D5	+		catalytic activity;peptidase activity;serine-type peptidase activity;transferase activity;hydrolase activity;serine hydrolase activity;peptidase activity, acting on L-amino acid peptides					Abhydrolase_3;Acyl_transf_1;ketoacyl-synt;Ketoacyl-synt_C;Methyltransf_12;Peptidase_S9;PP-binding;PS-DH		Completeproteome;Phosphopantetheine;Referenceproteome			GO:0003824;GO:0008233;GO:0008236;GO:0016740;GO:0016787;GO:0017171;GO:0070011				CADANIAG00006526	CADANIAP00006526	CADANIAT00006526				IPR029058;IPR013094;IPR001227;IPR009081;IPR014043;IPR016035;IPR014031;IPR014030;IPR016036;IPR013217;IPR001375;IPR020807;IPR006162;IPR029063;IPR016039;IPR016038	AB_hydrolase;AB_hydrolase_3;Ac_transferase_dom;Acyl_carrier_prot-like;Acyl_transferase;Acyl_Trfase/lysoPLipase;Ketoacyl_synth_C;Ketoacyl_synth_N;Malonyl_transacylase_ACP-bd;Methyltransf_12;Peptidase_S9;PKS_dehydratase;Ppantetheine_attach_site;SAM-dependent_MTases;Thiolase-like;Thiolase-like_subgr					PF07859;PF00698;PF00109;PF02801;PF08242;PF00326;PF00550;PF14765			PS50075;PS00012	ACP_DOMAIN;PHOSPHOPANTETHEINE						Emericella nidulans (strain FGSC A4 / ATCC 38163 / CBS 112.46 / NRRL 194 / M139)	Q5AZ32_EMENI			COG3321
Q5B192;C8VFQ5	+	lipid metabolic process;metabolic process;lipid biosynthetic process;biosynthetic process;primary metabolic process			lipid metabolic process;metabolic process;biosynthetic process;primary metabolic process			CMAS		Completeproteome;Referenceproteome		GO:0006629;GO:0008152;GO:0008610;GO:0009058;GO:0044238			GO:0006629;GO:0008152;GO:0009058;GO:0044238		CADANIAG00003377	CADANIAP00003377	CADANIAT00003377				IPR003333;IPR029063	Mycolic_cyclopropane_synthase;SAM-dependent_MTases					PF02353										Emericella nidulans (strain FGSC A4 / ATCC 38163 / CBS 112.46 / NRRL 194 / M139)	Q5B192_EMENI			COG2230
G5EB16;C8V1C4	+	nucleobase-containing compound metabolic process;DNA metabolic process;DNA modification;DNA alkylation;DNA methylation;one-carbon metabolic process;nitrogen compound metabolic process;metabolic process;cellular process;regulation of gene expression;regulation of metabolic process;methylation;cellular nitrogen compound metabolic process;regulation of gene expression, epigenetic;macromolecule metab…	nucleic acid binding;DNA binding;catalytic activity;binding;methyltransferase activity;transferase activity;transferase activity, transferring one-carbon groups		nucleobase-containing compound metabolic process;DNA metabolic process;DNA modification;one-carbon metabolic process;nitrogen compound metabolic process;metabolic process;cellular process;cellular nitrogen compound metabolic process;regulation of gene expression, epigenetic;macromolecule metabolic process;macromolecule modification;cellular metabolic process;primary metabolic process;small molecu…		Cysteine and methionine metabolism			Completeproteome;Referenceproteome		GO:0006139;GO:0006259;GO:0006304;GO:0006305;GO:0006306;GO:0006730;GO:0006807;GO:0008152;GO:0009987;GO:0010468;GO:0019222;GO:0032259;GO:0034641;GO:0040029;GO:0043170;GO:0043412;GO:0043414;GO:0044237;GO:0044238;GO:0044260;GO:0044281;GO:0050789;GO:0060255;GO:0065007;GO:0090304	GO:0003676;GO:0003677;GO:0003824;GO:0005488;GO:0008168;GO:0016740;GO:0016741		GO:0006139;GO:0006259;GO:0006304;GO:0006730;GO:0006807;GO:0008152;GO:0009987;GO:0034641;GO:0040029;GO:0043170;GO:0043412;GO:0044237;GO:0044238;GO:0044281;GO:0065007		CADANIAG00007420	CADANIAP00007420	CADANIAT00007420				IPR018117;IPR001525;IPR029063	C5_DNA_meth_AS;C5_MeTfrase;SAM-dependent_MTases	ko00270					PR00105	C5METTRFRASE	PS00095;PS51679	C5_MTASE_2;SAM_MT_C5						Emericella nidulans (strain FGSC A4 / ATCC 38163 / CBS 112.46 / NRRL 194 / M139)	G5EB16_EMENI
Q5B857;C8VI30	+		catalytic activity;binding;zinc ion binding;oxidoreductase activity;transferase activity;ion binding;cation binding;metal ion binding;transition metal ion binding					ADH_zinc_N;KR;Methyltransf_12;PP-binding;PS-DH		Completeproteome;Phosphopantetheine;Referenceproteome			GO:0003824;GO:0005488;GO:0008270;GO:0016491;GO:0016740;GO:0043167;GO:0043169;GO:0046872;GO:0046914				CADANIAG00009787	CADANIAP00009787	CADANIAT00009787				IPR001227;IPR009081;IPR016035;IPR013149;IPR011032;IPR013217;IPR016040;IPR020807;IPR020843;IPR013968;IPR006162;IPR029063	Ac_transferase_dom;Acyl_carrier_prot-like;Acyl_Trfase/lysoPLipase;ADH_C;GroES-like;Methyltransf_12;NAD(P)-bd_dom;PKS_dehydratase;PKS_ER;PKS_KR;Ppantetheine_attach_site;SAM-dependent_MTases					PF00107;PF08659;PF08242;PF00550;PF14765			PS50075;PS00012	ACP_DOMAIN;PHOSPHOPANTETHEINE				SM00826;SM00829;SM00822	PKS_DH;PKS_ER;PKS_KR	Emericella nidulans (strain FGSC A4 / ATCC 38163 / CBS 112.46 / NRRL 194 / M139)	Q5B857_EMENI			COG3321
Q5B0U5	+	organic acid metabolic process;cellular amino acid metabolic process;glycine metabolic process;L-serine metabolic process;lipid metabolic process;cellular aromatic compound metabolic process;one-carbon metabolic process;coenzyme metabolic process;folic acid-containing compound metabolic process;nitrogen compound metabolic process;metabolic process;serine family amino acid metabolic process;amine …	catalytic activity;glycine hydroxymethyltransferase activity;binding;transferase activity;transferase activity, transferring one-carbon groups;hydroxymethyl-, formyl- and related transferase activity;vitamin binding;molybdenum ion binding;pyridoxal phosphate binding;ion binding;cation binding;metal ion binding;transition metal ion binding;cofactor binding;vitamin B6 binding		organic acid metabolic process;cellular amino acid metabolic process;lipid metabolic process;cellular aromatic compound metabolic process;one-carbon metabolic process;nitrogen compound metabolic process;metabolic process;amine metabolic process;cellular process;cellular nitrogen compound metabolic process;cellular ketone metabolic process;cellular metabolic process;primary metabolic process;small…			MOSC;MOSC_N;Patatin;SHMT		One-carbonmetabolism;Pyridoxalphosphate;Transferase		GO:0006082;GO:0006520;GO:0006544;GO:0006563;GO:0006629;GO:0006725;GO:0006730;GO:0006732;GO:0006760;GO:0006807;GO:0008152;GO:0009069;GO:0009308;GO:0009987;GO:0019752;GO:0034641;GO:0035999;GO:0042180;GO:0042558;GO:0043436;GO:0044106;GO:0044237;GO:0044238;GO:0044281;GO:0046483;GO:0046653;GO:0051186	GO:0003824;GO:0004372;GO:0005488;GO:0016740;GO:0016741;GO:0016742;GO:0019842;GO:0030151;GO:0030170;GO:0043167;GO:0043169;GO:0046872;GO:0046914;GO:0048037;GO:0070279		GO:0006082;GO:0006520;GO:0006629;GO:0006725;GO:0006730;GO:0006807;GO:0008152;GO:0009308;GO:0009987;GO:0034641;GO:0042180;GO:0044237;GO:0044238;GO:0044281;GO:0046483;GO:0051186							AN5835.2	IPR016035;IPR005302;IPR005303;IPR002641;IPR015424;IPR015421;IPR015422;IPR011037;IPR001085;IPR019798	Acyl_Trfase/lysoPLipase;MoCF_Sase_C;MOSC_N;Patatin/PLipase_A2-rel;PyrdxlP-dep_Trfase;PyrdxlP-dep_Trfase_major_sub1;PyrdxlP-dep_Trfase_major_sub2;Pyrv_Knase-like_insert_dom;Ser_HO-MeTrfase;Ser_HO-MeTrfase_PLP_BS					PF03473;PF03476;PF01734;PF00464			PS51340;PS00096	MOSC;SHMT	Serine hydroxymethyltransferase					Emericella nidulans (strain FGSC A4 / ATCC 38163 / CBS 112.46 / NRRL 194 / M139)	Q5B0U5_EMENI		2.1.2.1	COG3217
Q5B7U4;C8VHN6	+		catalytic activity;transferase activity					Acyl_transf_1;ketoacyl-synt;Ketoacyl-synt_C;Methyltransf_12;NAD_binding_4;PP-binding;PS-DH		Completeproteome;Phosphopantetheine;Referenceproteome			GO:0003824;GO:0016740				CADANIAG00009654	CADANIAP00009654	CADANIAT00009654				IPR001227;IPR009081;IPR014043;IPR016035;IPR014031;IPR014030;IPR013120;IPR016036;IPR013217;IPR016040;IPR020801;IPR020807;IPR006162;IPR029063;IPR016039;IPR016038	Ac_transferase_dom;Acyl_carrier_prot-like;Acyl_transferase;Acyl_Trfase/lysoPLipase;Ketoacyl_synth_C;Ketoacyl_synth_N;Male_sterile_NAD-bd;Malonyl_transacylase_ACP-bd;Methyltransf_12;NAD(P)-bd_dom;PKS_acyl_transferase;PKS_dehydratase;Ppantetheine_attach_site;SAM-dependent_MTases;Thiolase-like;Thiolase-like_subgr					PF00698;PF00109;PF02801;PF08242;PF07993;PF00550;PF14765			PS50075;PS00012	ACP_DOMAIN;PHOSPHOPANTETHEINE				SM00827	PKS_AT	Emericella nidulans (strain FGSC A4 / ATCC 38163 / CBS 112.46 / NRRL 194 / M139)	Q5B7U4_EMENI			COG3320
Q5AY39;C8V281	+	metabolic process;secondary metabolic process	catalytic activity;binding;zinc ion binding;oxidoreductase activity;transferase activity;ion binding;cation binding;metal ion binding;transition metal ion binding		metabolic process;secondary metabolic process			Acyl_transf_1;ADH_zinc_N;ketoacyl-synt;Ketoacyl-synt_C;KR;Methyltransf_12;PP-binding;PS-DH		Completeproteome;Phosphopantetheine;Referenceproteome		GO:0008152;GO:0019748	GO:0003824;GO:0005488;GO:0008270;GO:0016491;GO:0016740;GO:0043167;GO:0043169;GO:0046872;GO:0046914		GO:0008152;GO:0019748		CADANIAG00007586	CADANIAP00007586	CADANIAT00007586				IPR001227;IPR009081;IPR014043;IPR016035;IPR013149;IPR011032;IPR014031;IPR014030;IPR016036;IPR013217;IPR016040;IPR020801;IPR020841;IPR020807;IPR020843;IPR013968;IPR006162;IPR002364;IPR029063;IPR016039;IPR016038	Ac_transferase_dom;Acyl_carrier_prot-like;Acyl_transferase;Acyl_Trfase/lysoPLipase;ADH_C;GroES-like;Ketoacyl_synth_C;Ketoacyl_synth_N;Malonyl_transacylase_ACP-bd;Methyltransf_12;NAD(P)-bd_dom;PKS_acyl_transferase;PKS_Beta-ketoAc_synthase_dom;PKS_dehydratase;PKS_ER;PKS_KR;Ppantetheine_attach_site;Quin_OxRdtase/zeta-crystal_CS;SAM-dependent_MTases;Thiolase-like;Thiolase-like_subgr					PF00698;PF00107;PF00109;PF02801;PF08659;PF08242;PF00550;PF14765			PS50075;PS00012;PS01162	ACP_DOMAIN;PHOSPHOPANTETHEINE;QOR_ZETA_CRYSTAL				SM00827;SM00826;SM00829;SM00822;SM00825	PKS_AT;PKS_DH;PKS_ER;PKS_KR;PKS_KS	Emericella nidulans (strain FGSC A4 / ATCC 38163 / CBS 112.46 / NRRL 194 / M139)	Q5AY39_EMENI			COG3321
C8VLC5	+	coenzyme metabolic process;oxidoreduction coenzyme metabolic process;ubiquinone metabolic process;ubiquinone biosynthetic process;metabolic process;biosynthetic process;coenzyme biosynthetic process;cellular process;cellular ketone metabolic process;quinone cofactor metabolic process;cellular metabolic process;cellular biosynthetic process;small molecule metabolic process;quinone cofactor biosynt…	catalytic activity;hexaprenyldihydroxybenzoate methyltransferase activity;methyltransferase activity;C-methyltransferase activity;2-polyprenyl-6-methoxy-1,4-benzoquinone methyltransferase activity;S-adenosylmethionine-dependent methyltransferase activity;polyprenyldihydroxybenzoate methyltransferase activity;transferase activity;transferase activity, transferring one-carbon groups;quinone cofacto…	extrinsic to membrane;extrinsic to organelle membrane;extrinsic to mitochondrial inner membrane;organelle part;intracellular part;membrane part;mitochondrial part;cytoplasmic part;intracellular organelle part;mitochondrial membrane part;cell part	metabolic process;biosynthetic process;cellular process;cellular ketone metabolic process;cellular metabolic process;small molecule metabolic process;cofactor metabolic process	cell part			ALCOHOL_METABOLIC_PROCESS;BIOSYNTHETIC_PROCESS;CASORELLI_ACUTE_PROMYELOCYTIC_LEUKEMIA_DN;CELLULAR_BIOSYNTHETIC_PROCESS;chr6q21;COENZYME_BIOSYNTHETIC_PROCESS;COENZYME_METABOLIC_PROCESS;COFACTOR_BIOSYNTHETIC_PROCESS;COFACTOR_METABOLIC_PROCESS;GEORGES_TARGETS_OF_MIR192_AND_MIR215;GOBERT_OLIGODENDROCYTE_DIFFERENTIATION_DN;GRAESSMANN_APOPTOSIS_BY_DOXORUBICIN_DN;GRAESSMANN_RESPONSE_TO_MC_AND_DOXORUBICI…	Completeproteome;Membrane;Methyltransferase;Mitochondrion;Mitochondrioninnermembrane;Referenceproteome;S-adenosyl-L-methionine;Transferase;Transitpeptide;Ubiquinonebiosynthesis		GO:0006732;GO:0006733;GO:0006743;GO:0006744;GO:0008152;GO:0009058;GO:0009108;GO:0009987;GO:0042180;GO:0042375;GO:0044237;GO:0044249;GO:0044281;GO:0045426;GO:0051186;GO:0051188	GO:0003824;GO:0004395;GO:0008168;GO:0008169;GO:0008425;GO:0008757;GO:0010420;GO:0016740;GO:0016741;GO:0030580	GO:0019898;GO:0031312;GO:0031314;GO:0044422;GO:0044424;GO:0044425;GO:0044429;GO:0044444;GO:0044446;GO:0044455;GO:0044464	GO:0008152;GO:0009058;GO:0009987;GO:0042180;GO:0044237;GO:0044281;GO:0051186	GO:0044464	CADANIAG00008665	CADANIAP00008665	CADANIAT00008665			COQ3	IPR029063;IPR010233	SAM-dependent_MTases;UbiG_MeTrfase										Ubiquinone biosynthesis O-methyltransferase, mitochondrial					Emericella nidulans (strain FGSC A4 / ATCC 38163 / CBS 112.46 / NRRL 194 / M139)	C8VLC5_EMENI
C8VQ72	+									Completeproteome;Referenceproteome							CADANIAG00002599	CADANIAP00002599	CADANIAT00002599			ANIA_10021	IPR029063;IPR011991	SAM-dependent_MTases;WHTH_DNA-bd_dom															Emericella nidulans (strain FGSC A4 / ATCC 38163 / CBS 112.46 / NRRL 194 / M139)	C8VQ72_EMENI
Q5B8N4	+	protein modification process;protein methylation;one-carbon metabolic process;metabolic process;protein alkylation;cellular process;protein metabolic process;methylation;macromolecule metabolic process;macromolecule modification;macromolecule methylation;cellular metabolic process;primary metabolic process;cellular macromolecule metabolic process;cellular protein metabolic process;small molecule …	catalytic activity;methyltransferase activity;transferase activity;transferase activity, transferring one-carbon groups		protein modification process;one-carbon metabolic process;metabolic process;protein alkylation;cellular process;protein metabolic process;macromolecule metabolic process;macromolecule modification;cellular metabolic process;primary metabolic process;small molecule metabolic process			Methyltransf_31		Methyltransferase;S-adenosyl-L-methionine;Transferase		GO:0006464;GO:0006479;GO:0006730;GO:0008152;GO:0008213;GO:0009987;GO:0019538;GO:0032259;GO:0043170;GO:0043412;GO:0043414;GO:0044237;GO:0044238;GO:0044260;GO:0044267;GO:0044281	GO:0003824;GO:0008168;GO:0016740;GO:0016741		GO:0006464;GO:0006730;GO:0008152;GO:0008213;GO:0009987;GO:0019538;GO:0043170;GO:0043412;GO:0044237;GO:0044238;GO:0044281							AN3096.2	IPR025799;IPR025714;IPR029063	Arg_MeTrfase;Methyltranfer_dom;SAM-dependent_MTases					PF13847			PS51678	SAM_MT_PRMT						Emericella nidulans (strain FGSC A4 / ATCC 38163 / CBS 112.46 / NRRL 194 / M139)	Q5B8N4_EMENI			COG0500
Q5BB04;C8VN23	+	nucleobase-containing compound metabolic process;DNA metabolic process;DNA repair;nitrogen compound metabolic process;response to stress;response to DNA damage stimulus;metabolic process;cellular process;cellular response to stress;cellular nitrogen compound metabolic process;macromolecule metabolic process;cellular metabolic process;primary metabolic process;cellular macromolecule metabolic proc…	nucleic acid binding transcription factor activity;nucleic acid binding;DNA binding;sequence-specific DNA binding transcription factor activity;catalytic activity;binding;methyltransferase activity;zinc ion binding;transferase activity;transferase activity, transferring one-carbon groups;ion binding;cation binding;sequence-specific DNA binding;metal ion binding;transition metal ion binding		nucleobase-containing compound metabolic process;DNA metabolic process;DNA repair;nitrogen compound metabolic process;response to stress;response to DNA damage stimulus;metabolic process;cellular process;cellular nitrogen compound metabolic process;macromolecule metabolic process;cellular metabolic process;primary metabolic process;response to stimulus			Ada_Zn_binding;HTH_AraC		Completeproteome;Referenceproteome		GO:0006139;GO:0006259;GO:0006281;GO:0006807;GO:0006950;GO:0006974;GO:0008152;GO:0009987;GO:0033554;GO:0034641;GO:0043170;GO:0044237;GO:0044238;GO:0044260;GO:0050896;GO:0051716;GO:0090304	GO:0001071;GO:0003676;GO:0003677;GO:0003700;GO:0003824;GO:0005488;GO:0008168;GO:0008270;GO:0016740;GO:0016741;GO:0043167;GO:0043169;GO:0043565;GO:0046872;GO:0046914		GO:0006139;GO:0006259;GO:0006281;GO:0006807;GO:0006950;GO:0006974;GO:0008152;GO:0009987;GO:0034641;GO:0043170;GO:0044237;GO:0044238;GO:0050896		CADANIAG00008968	CADANIAP00008968	CADANIAT00008968				IPR004026;IPR009057;IPR018060	Ada_DNA_repair_Zn-bd;Homeodomain-like;HTH_AraC					PF02805;PF00165			PS01124	HTH_ARAC_FAMILY_2						Emericella nidulans (strain FGSC A4 / ATCC 38163 / CBS 112.46 / NRRL 194 / M139)	Q5BB04_EMENI			COG2169
Q5B622;C8V5Q8	+		catalytic activity;methyltransferase activity;O-methyltransferase activity;transferase activity;transferase activity, transferring one-carbon groups					Methyltransf_2		Completeproteome;Referenceproteome;S-adenosyl-L-methionine			GO:0003824;GO:0008168;GO:0008171;GO:0016740;GO:0016741				CADANIAG00004676	CADANIAP00004676	CADANIAT00004676				IPR016461;IPR001077;IPR029063;IPR011991	O-MeTrfase_COMT;O_MeTrfase_2;SAM-dependent_MTases;WHTH_DNA-bd_dom					PF00891			PS51683	SAM_OMT_II						Emericella nidulans (strain FGSC A4 / ATCC 38163 / CBS 112.46 / NRRL 194 / M139)	Q5B622_EMENI			NOG270982
Q5BB73;C8VMJ8	+		catalytic activity;methyltransferase activity;O-methyltransferase activity;transferase activity;transferase activity, transferring one-carbon groups					Methyltransf_3		Completeproteome;Referenceproteome			GO:0003824;GO:0008168;GO:0008171;GO:0016740;GO:0016741				CADANIAG00008891	CADANIAP00008891	CADANIAT00008891				IPR002935;IPR029063	O-MeTrfase_3;SAM-dependent_MTases					PF01596			PS51682	SAM_OMT_I						Emericella nidulans (strain FGSC A4 / ATCC 38163 / CBS 112.46 / NRRL 194 / M139)	Q5BB73_EMENI			COG4122
Q5AX34;C8VD79	+	alcohol metabolic process;lipid metabolic process;steroid biosynthetic process;ergosterol biosynthetic process;one-carbon metabolic process;metabolic process;steroid metabolic process;ergosterol metabolic process;lipid biosynthetic process;biosynthetic process;cellular process;sterol metabolic process;sterol biosynthetic process;phytosteroid metabolic process;phytosteroid biosynthetic process;met…	catalytic activity;sterol 24-C-methyltransferase activity;methyltransferase activity;C-methyltransferase activity;S-adenosylmethionine-dependent methyltransferase activity;transferase activity;transferase activity, transferring one-carbon groups	cytoplasm;intracellular part;cell part	alcohol metabolic process;lipid metabolic process;one-carbon metabolic process;metabolic process;biosynthetic process;cellular process;cellular metabolic process;primary metabolic process;small molecule metabolic process	cytoplasm;cell part	Steroid biosynthesis	Methyltransf_11;Sterol_MT_C		Completeproteome;Lipidbiosynthesis;Lipidmetabolism;Methyltransferase;Referenceproteome;S-adenosyl-L-methionine;Steroidbiosynthesis;Steroidmetabolism;Sterolbiosynthesis;Sterolmetabolism;Transferase		GO:0006066;GO:0006629;GO:0006694;GO:0006696;GO:0006730;GO:0008152;GO:0008202;GO:0008204;GO:0008610;GO:0009058;GO:0009987;GO:0016125;GO:0016126;GO:0016128;GO:0016129;GO:0032259;GO:0044107;GO:0044108;GO:0044237;GO:0044238;GO:0044249;GO:0044281;GO:0044283;GO:0046165	GO:0003824;GO:0003838;GO:0008168;GO:0008169;GO:0008757;GO:0016740;GO:0016741	GO:0005737;GO:0044424;GO:0044464	GO:0006066;GO:0006629;GO:0006730;GO:0008152;GO:0009058;GO:0009987;GO:0044237;GO:0044238;GO:0044281	GO:0005737;GO:0044464	CADANIAG00000311	CADANIAP00000311	CADANIAT00000311				IPR013216;IPR030384;IPR029063;IPR013705	Methyltransf_11;MeTrfase_SMT;SAM-dependent_MTases;Sterol_MeTrfase_C	ko00100				PF08241;PF08498			PS51685	SAM_MT_ERG6_SMT	Sterol 24-C-methyltransferase					Emericella nidulans (strain FGSC A4 / ATCC 38163 / CBS 112.46 / NRRL 194 / M139)	Q5AX34_EMENI		2.1.1.41	COG0500
Q5AT60;C8VEN6	+									Completeproteome;Referenceproteome							CADANIAG00003009	CADANIAP00003009	CADANIAT00003009				IPR029063	SAM-dependent_MTases															Emericella nidulans (strain FGSC A4 / ATCC 38163 / CBS 112.46 / NRRL 194 / M139)	Q5AT60_EMENI
Q5AQN1;C8VRK2	+	telomere maintenance;nucleobase-containing compound metabolic process;DNA metabolic process;chromatin organization;chromatin silencing;chromatin silencing at telomere;transcription, DNA-dependent;regulation of transcription, DNA-dependent;regulation of transcription from RNA polymerase II promoter;protein modification process;protein methylation;one-carbon metabolic process;nitrogen compound meta…	regulatory region DNA binding;regulatory region nucleic acid binding;nucleic acid binding;DNA binding;catalytic activity;binding;methyltransferase activity;N-methyltransferase activity;protein methyltransferase activity;S-adenosylmethionine-dependent methyltransferase activity;lysine N-methyltransferase activity;protein-lysine N-methyltransferase activity;transferase activity;transferase activity…	chromatin remodeling complex;macromolecular complex;methyltransferase complex;histone methyltransferase complex;protein complex;organelle part;intracellular part;nuclear part;intracellular organelle part;nucleoplasm part;cell part;Set1C/COMPASS complex;Lid2 complex	nucleobase-containing compound metabolic process;DNA metabolic process;chromatin organization;protein modification process;one-carbon metabolic process;nitrogen compound metabolic process;organelle organization;metabolic process;protein alkylation;biosynthetic process;cellular process;cellular component organization;RNA metabolic process;gene silencing;chromatin modification;histone modification;…	chromatin remodeling complex;macromolecular complex;histone methyltransferase complex;protein complex;cell part				Completeproteome;Referenceproteome		GO:0000723;GO:0006139;GO:0006259;GO:0006325;GO:0006342;GO:0006348;GO:0006351;GO:0006355;GO:0006357;GO:0006464;GO:0006479;GO:0006730;GO:0006807;GO:0006996;GO:0008152;GO:0008213;GO:0009058;GO:0009059;GO:0009889;GO:0009890;GO:0009892;GO:0009987;GO:0010468;GO:0010556;GO:0010558;GO:0010605;GO:0010629;GO:0016043;GO:0016070;GO:0016458;GO:0016568;GO:0016569;GO:0016570;GO:0016571;GO:0018022;GO:0018023;GO:…	GO:0000975;GO:0001067;GO:0003676;GO:0003677;GO:0003824;GO:0005488;GO:0008168;GO:0008170;GO:0008276;GO:0008757;GO:0016278;GO:0016279;GO:0016740;GO:0016741;GO:0018024;GO:0042054;GO:0042800;GO:0044212	GO:0016585;GO:0032991;GO:0034708;GO:0035097;GO:0043234;GO:0044422;GO:0044424;GO:0044428;GO:0044446;GO:0044451;GO:0044464;GO:0048188;GO:0048189	GO:0006139;GO:0006259;GO:0006325;GO:0006464;GO:0006730;GO:0006807;GO:0006996;GO:0008152;GO:0008213;GO:0009058;GO:0009987;GO:0016043;GO:0016070;GO:0016458;GO:0016568;GO:0016570;GO:0018193;GO:0019538;GO:0032200;GO:0034641;GO:0040029;GO:0042592;GO:0043170;GO:0043412;GO:0044237;GO:0044238;GO:0044281;GO:0051276;GO:0065007	GO:0016585;GO:0032991;GO:0035097;GO:0043234;GO:0044464	CADANIAG00001186	CADANIAP00001186	CADANIAT00001186				IPR001870;IPR013320	B30.2/SPRY;ConA-like_dom								PS50188	B302_SPRY						Emericella nidulans (strain FGSC A4 / ATCC 38163 / CBS 112.46 / NRRL 194 / M139)	Q5AQN1_EMENI			NOG249281
Q5B7C4;C8V4H5	+		nucleotide binding;catalytic activity;transporter activity;binding;ATP binding;methyltransferase activity;S-adenosylmethionine-dependent methyltransferase activity;primary active transmembrane transporter activity;P-P-bond-hydrolysis-driven transmembrane transporter activity;pyrophosphatase activity;transferase activity;transferase activity, transferring one-carbon groups;hydrolase activity;hydro…	cytosol;integral to membrane;intrinsic to membrane;intracellular part;membrane part;cytoplasmic part;cell part		cytosol;cell part		ABC_membrane		Completeproteome;Referenceproteome			GO:0000166;GO:0003824;GO:0005215;GO:0005488;GO:0005524;GO:0008168;GO:0008757;GO:0015399;GO:0015405;GO:0016462;GO:0016740;GO:0016741;GO:0016787;GO:0016817;GO:0016818;GO:0016820;GO:0016887;GO:0017076;GO:0017111;GO:0022804;GO:0022857;GO:0030554;GO:0030791;GO:0032553;GO:0032555;GO:0032559;GO:0035639;GO:0042623;GO:0042626;GO:0043492	GO:0005829;GO:0016021;GO:0031224;GO:0044424;GO:0044425;GO:0044444;GO:0044464		GO:0005829;GO:0044464	CADANIAG00005190	CADANIAP00005190	CADANIAT00005190				IPR011527;IPR026669;IPR029063	ABC1_TM_dom;Arsenite_MeTrfase;SAM-dependent_MTases					PF00664										Emericella nidulans (strain FGSC A4 / ATCC 38163 / CBS 112.46 / NRRL 194 / M139)	Q5B7C4_EMENI			COG1132
Q5BD68	+		catalytic activity;ligase activity;ligase activity, forming carbon-nitrogen bonds;carbon-nitrogen ligase activity, with glutamine as amido-N-donor					Amidase;Methyltransf_28					GO:0003824;GO:0016874;GO:0016879;GO:0016884									AN1512.2	IPR000120;IPR023631;IPR003788;IPR029063	Amidase;Amidase_dom;MidA;SAM-dependent_MTases					PF01425;PF02636										Emericella nidulans (strain FGSC A4 / ATCC 38163 / CBS 112.46 / NRRL 194 / M139)	Q5BD68_EMENI			COG0154
Q5BBB5	+																					AN2165.2	IPR029063	SAM-dependent_MTases															Emericella nidulans (strain FGSC A4 / ATCC 38163 / CBS 112.46 / NRRL 194 / M139)	Q5BBB5_EMENI			NOG253737
Q5B089;C8V2W2	+							Methyltransf_28		Completeproteome;Referenceproteome							CADANIAG00006977	CADANIAP00006977	CADANIAT00006977				IPR003788;IPR029063	MidA;SAM-dependent_MTases					PF02636										Emericella nidulans (strain FGSC A4 / ATCC 38163 / CBS 112.46 / NRRL 194 / M139)	Q5B089_EMENI			COG1565
Q5B4E3;C8V7V2	+	nucleobase-containing compound metabolic process;DNA metabolic process;DNA modification;DNA dealkylation involved in DNA repair;one-carbon metabolic process;nitrogen compound metabolic process;metabolic process;cellular process;methylation;cellular nitrogen compound metabolic process;DNA dealkylation;macromolecule metabolic process;macromolecule modification;cellular metabolic process;primary met…	nucleic acid binding;DNA binding;damaged DNA binding;catalytic activity;methylated-DNA-[protein]-cysteine S-methyltransferase activity;binding;methyltransferase activity;S-methyltransferase activity;transferase activity;transferase activity, transferring one-carbon groups	nucleus;organelle;membrane-bounded organelle;intracellular organelle;intracellular membrane-bounded organelle;intracellular part;cell part	nucleobase-containing compound metabolic process;DNA metabolic process;DNA modification;one-carbon metabolic process;nitrogen compound metabolic process;metabolic process;cellular process;cellular nitrogen compound metabolic process;macromolecule metabolic process;macromolecule modification;cellular metabolic process;primary metabolic process;small molecule metabolic process	nucleus;organelle;intracellular organelle;intracellular membrane-bounded organelle;cell part		DNA_binding_1		Completeproteome;Referenceproteome		GO:0006139;GO:0006259;GO:0006304;GO:0006307;GO:0006730;GO:0006807;GO:0008152;GO:0009987;GO:0032259;GO:0034641;GO:0035510;GO:0043170;GO:0043412;GO:0044237;GO:0044238;GO:0044260;GO:0044281;GO:0090304	GO:0003676;GO:0003677;GO:0003684;GO:0003824;GO:0003908;GO:0005488;GO:0008168;GO:0008172;GO:0016740;GO:0016741	GO:0005634;GO:0043226;GO:0043227;GO:0043229;GO:0043231;GO:0044424;GO:0044464	GO:0006139;GO:0006259;GO:0006304;GO:0006730;GO:0006807;GO:0008152;GO:0009987;GO:0034641;GO:0043170;GO:0043412;GO:0044237;GO:0044238;GO:0044281	GO:0005634;GO:0043226;GO:0043229;GO:0043231;GO:0044464	CADANIAG00005849	CADANIAP00005849	CADANIAT00005849				IPR001497;IPR014048;IPR011991	MethylDNA_cys_MeTrfase_AS;MethylDNA_cys_MeTrfase_DNA-bd;WHTH_DNA-bd_dom					PF01035			PS00374	MGMT						Emericella nidulans (strain FGSC A4 / ATCC 38163 / CBS 112.46 / NRRL 194 / M139)	Q5B4E3_EMENI			COG0350
Q5AT88;C8VEK7	+	one-carbon metabolic process;metabolic process;cellular process;methylation;cellular metabolic process;small molecule metabolic process	catalytic activity;methyltransferase activity;S-adenosylmethionine-dependent methyltransferase activity;transferase activity;transferase activity, transferring one-carbon groups	cytoplasm;intracellular part;cell part	one-carbon metabolic process;metabolic process;cellular process;cellular metabolic process;small molecule metabolic process	cytoplasm;cell part				Completeproteome;Referenceproteome		GO:0006730;GO:0008152;GO:0009987;GO:0032259;GO:0044237;GO:0044281	GO:0003824;GO:0008168;GO:0008757;GO:0016740;GO:0016741	GO:0005737;GO:0044424;GO:0044464	GO:0006730;GO:0008152;GO:0009987;GO:0044237;GO:0044281	GO:0005737;GO:0044464	CADANIAG00002980	CADANIAP00002980	CADANIAT00002980				IPR029063	SAM-dependent_MTases															Emericella nidulans (strain FGSC A4 / ATCC 38163 / CBS 112.46 / NRRL 194 / M139)	Q5AT88_EMENI			NOG319369
Q5B3A6;C8V8Z7	+	one-carbon metabolic process;metabolic process;cellular process;methylation;cellular metabolic process;small molecule metabolic process	catalytic activity;methyltransferase activity;S-adenosylmethionine-dependent methyltransferase activity;transferase activity;transferase activity, transferring one-carbon groups	cytoplasm;mitochondrial envelope;organelle envelope;envelope;organelle part;intracellular part;mitochondrial part;cytoplasmic part;intracellular organelle part;cell part	one-carbon metabolic process;metabolic process;cellular process;cellular metabolic process;small molecule metabolic process	cytoplasm;mitochondrial envelope;cell part				Completeproteome;Referenceproteome		GO:0006730;GO:0008152;GO:0009987;GO:0032259;GO:0044237;GO:0044281	GO:0003824;GO:0008168;GO:0008757;GO:0016740;GO:0016741	GO:0005737;GO:0005740;GO:0031967;GO:0031975;GO:0044422;GO:0044424;GO:0044429;GO:0044444;GO:0044446;GO:0044464	GO:0006730;GO:0008152;GO:0009987;GO:0044237;GO:0044281	GO:0005737;GO:0005740;GO:0044464	CADANIAG00005421	CADANIAP00005421	CADANIAT00005421				IPR029063	SAM-dependent_MTases															Emericella nidulans (strain FGSC A4 / ATCC 38163 / CBS 112.46 / NRRL 194 / M139)	Q5B3A6_EMENI			COG0500
Q5AW40;C8VBG7	+	nucleobase-containing compound metabolic process;nitrogen compound metabolic process;metabolic process;cellular process;cellular nitrogen compound metabolic process;cellular metabolic process;primary metabolic process	nucleic acid binding;catalytic activity;binding;methyltransferase activity;transferase activity;transferase activity, transferring one-carbon groups	cytosol;intracellular part;cytoplasmic part;cell part	nucleobase-containing compound metabolic process;nitrogen compound metabolic process;metabolic process;cellular process;cellular nitrogen compound metabolic process;cellular metabolic process;primary metabolic process	cytosol;cell part		MT-A70		Completeproteome;Referenceproteome		GO:0006139;GO:0006807;GO:0008152;GO:0009987;GO:0034641;GO:0044237;GO:0044238	GO:0003676;GO:0003824;GO:0005488;GO:0008168;GO:0016740;GO:0016741	GO:0005829;GO:0044424;GO:0044444;GO:0044464	GO:0006139;GO:0006807;GO:0008152;GO:0009987;GO:0034641;GO:0044237;GO:0044238	GO:0005829;GO:0044464	CADANIAG00000584	CADANIAP00000584	CADANIAT00000584				IPR002052;IPR007757	DNA_methylase_N6_adenine_CS;MT-A70-like					PF05063			PS51143;PS00092	MT_A70;N6_MTASE						Emericella nidulans (strain FGSC A4 / ATCC 38163 / CBS 112.46 / NRRL 194 / M139)	Q5AW40_EMENI			NOG249266
Q5AXM8;C8V386	+		catalytic activity;methyltransferase activity;O-methyltransferase activity;transferase activity;transferase activity, transferring one-carbon groups					Methyltransf_2		Completeproteome;Referenceproteome;S-adenosyl-L-methionine			GO:0003824;GO:0008168;GO:0008171;GO:0016740;GO:0016741				CADANIAG00007764	CADANIAP00007764	CADANIAT00007764				IPR016461;IPR001077;IPR029063;IPR011991	O-MeTrfase_COMT;O_MeTrfase_2;SAM-dependent_MTases;WHTH_DNA-bd_dom					PF00891			PS51683	SAM_OMT_II						Emericella nidulans (strain FGSC A4 / ATCC 38163 / CBS 112.46 / NRRL 194 / M139)	Q5AXM8_EMENI			NOG260474
Q5B1D5	+		catalytic activity;acetyltransferase activity;transferase activity;transferase activity, transferring acyl groups;transferase activity, transferring acyl groups other than amino-acyl groups					Acetyltransf_2;Methyltransf_6					GO:0003824;GO:0016407;GO:0016740;GO:0016746;GO:0016747									AN5645.2	IPR001447;IPR005493	Arylamine_N-AcTrfase;RNase_E_inh/diMeMenaQ_MeTrfase					PF00797;PF03737										Emericella nidulans (strain FGSC A4 / ATCC 38163 / CBS 112.46 / NRRL 194 / M139)	Q5B1D5_EMENI			COG0684
C8VLR2	+	one-carbon metabolic process;metabolic process;cellular process;methylation;cellular metabolic process;small molecule metabolic process	catalytic activity;methyltransferase activity;S-adenosylmethionine-dependent methyltransferase activity;transferase activity;transferase activity, transferring one-carbon groups	mitochondrion;organelle;membrane-bounded organelle;intracellular organelle;intracellular membrane-bounded organelle;intracellular part;cytoplasmic part;cell part	one-carbon metabolic process;metabolic process;cellular process;cellular metabolic process;small molecule metabolic process	mitochondrion;organelle;intracellular organelle;intracellular membrane-bounded organelle;cell part				Completeproteome;Referenceproteome		GO:0006730;GO:0008152;GO:0009987;GO:0032259;GO:0044237;GO:0044281	GO:0003824;GO:0008168;GO:0008757;GO:0016740;GO:0016741	GO:0005739;GO:0043226;GO:0043227;GO:0043229;GO:0043231;GO:0044424;GO:0044444;GO:0044464	GO:0006730;GO:0008152;GO:0009987;GO:0044237;GO:0044281	GO:0005739;GO:0043226;GO:0043229;GO:0043231;GO:0044464	CADANIAG00008755	CADANIAP00008755	CADANIAT00008755			ANIA_02084	IPR029063	SAM-dependent_MTases															Emericella nidulans (strain FGSC A4 / ATCC 38163 / CBS 112.46 / NRRL 194 / M139)	C8VLR2_EMENI
Q5AY81	+																					AN6749.2	IPR029063	SAM-dependent_MTases															Emericella nidulans (strain FGSC A4 / ATCC 38163 / CBS 112.46 / NRRL 194 / M139)	Q5AY81_EMENI			NOG135813
Q5BAM5	+																					AN2405.2	IPR029063	SAM-dependent_MTases															Emericella nidulans (strain FGSC A4 / ATCC 38163 / CBS 112.46 / NRRL 194 / M139)	Q5BAM5_EMENI			NOG322296
Q5AVF8;C8VDI6		organic acid metabolic process;cellular amino acid metabolic process;arginine metabolic process;arginine biosynthetic process;ornithine metabolic process;ornithine biosynthetic process;nitrogen compound metabolic process;cellular cell wall organization;metabolic process;cellular amino acid biosynthetic process;biosynthetic process;glutamine family amino acid metabolic process;glutamine family ami…	catalytic activity;acetyl-CoA:L-glutamate N-acetyltransferase activity;glutamate N-acetyltransferase activity;N-acetyltransferase activity;acetyltransferase activity;N-acyltransferase activity;transferase activity;transferase activity, transferring acyl groups;transferase activity, transferring acyl groups other than amino-acyl groups	mitochondrial matrix;membrane-enclosed lumen;organelle lumen;organelle part;intracellular part;mitochondrial part;cytoplasmic part;intracellular organelle part;cell part;intracellular organelle lumen	organic acid metabolic process;cellular amino acid metabolic process;nitrogen compound metabolic process;cellular cell wall organization;metabolic process;biosynthetic process;amine metabolic process;cellular process;cellular component organization;cellular nitrogen compound metabolic process;cellular ketone metabolic process;cellular metabolic process;primary metabolic process;small molecule met…	cell part	Arginine and proline metabolism	ArgJ		Acyltransferase;Amino-acidbiosynthesis;Argininebiosynthesis;Autocatalyticcleavage;Completeproteome;Mitochondrion;Multifunctionalenzyme;Referenceproteome;Transferase;Transitpeptide		GO:0006082;GO:0006520;GO:0006525;GO:0006526;GO:0006591;GO:0006592;GO:0006807;GO:0007047;GO:0008152;GO:0008652;GO:0009058;GO:0009064;GO:0009084;GO:0009308;GO:0009309;GO:0009987;GO:0016043;GO:0016053;GO:0019752;GO:0031505;GO:0034641;GO:0042180;GO:0043436;GO:0044106;GO:0044237;GO:0044238;GO:0044249;GO:0044271;GO:0044281;GO:0044283;GO:0045229;GO:0046394;GO:0070882;GO:0071554;GO:0071555;GO:0071840;GO:…	GO:0003824;GO:0004042;GO:0004358;GO:0008080;GO:0016407;GO:0016410;GO:0016740;GO:0016746;GO:0016747	GO:0005759;GO:0031974;GO:0043233;GO:0044422;GO:0044424;GO:0044429;GO:0044444;GO:0044446;GO:0044464;GO:0070013	GO:0006082;GO:0006520;GO:0006807;GO:0007047;GO:0008152;GO:0009058;GO:0009308;GO:0009987;GO:0016043;GO:0034641;GO:0042180;GO:0044237;GO:0044238;GO:0044281;GO:0045229;GO:0070882;GO:0071554;GO:0071555	GO:0044464	CADANIAG00000855	CADANIAP00000855	CADANIAT00000855			ornA	IPR002813;IPR016117	Arg_biosynth_ArgJ;ArgJ-like_dom	ko00330				PF01960					Arginine biosynthesis bifunctional protein ArgJ, mitochondrial;Glutamate N-acetyltransferase;Amino-acid acetyltransferase;Arginine biosynthesis bifunctional protein ArgJ alpha chain;Arginine biosynthesis bifunctional protein ArgJ beta chain					Emericella nidulans (strain FGSC A4 / ATCC 38163 / CBS 112.46 / NRRL 194 / M139)	ARGJ_EMENI		2.3.1.35;2.3.1.1	COG1364
Q5B681;C8V626		polysaccharide catabolic process;carbohydrate metabolic process;polysaccharide metabolic process;metabolic process;catabolic process;macromolecule catabolic process;glucan catabolic process;carbohydrate catabolic process;cellulose metabolic process;cellulose catabolic process;macromolecule metabolic process;glucan metabolic process;primary metabolic process	catalytic activity;hydrolase activity, hydrolyzing O-glycosyl compounds;beta-glucosidase activity;glucosidase activity;hydrolase activity;hydrolase activity, acting on glycosyl bonds	extracellular region	carbohydrate metabolic process;polysaccharide metabolic process;metabolic process;catabolic process;macromolecule metabolic process;primary metabolic process	extracellular region		Fn3-like;Glyco_hydro_3;Glyco_hydro_3_C		Carbohydratemetabolism;Cellulosedegradation;Completeproteome;Glycoprotein;Glycosidase;Hydrolase;Polysaccharidedegradation;Referenceproteome;Secreted;Signal		GO:0000272;GO:0005975;GO:0005976;GO:0008152;GO:0009056;GO:0009057;GO:0009251;GO:0016052;GO:0030243;GO:0030245;GO:0043170;GO:0044042;GO:0044238	GO:0003824;GO:0004553;GO:0008422;GO:0015926;GO:0016787;GO:0016798	GO:0005576	GO:0005975;GO:0005976;GO:0008152;GO:0009056;GO:0043170;GO:0044238	GO:0005576	CADANIAG00004744	CADANIAP00004744	CADANIAT00004744			bglN	IPR026891;IPR026892;IPR002772;IPR001764;IPR017853	Fn3-like;Glyco_hydro_3;Glyco_hydro_3_C;Glyco_hydro_3_N;Glycoside_hydrolase_SF					PF14310;PF00933;PF01915					Probable beta-glucosidase N					Emericella nidulans (strain FGSC A4 / ATCC 38163 / CBS 112.46 / NRRL 194 / M139)	BGLN_EMENI		3.2.1.21	COG1472
Q5B1Z0;C8VGI0		response to stress;response to oxidative stress;response to chemical stimulus;response to stimulus	catalytic activity;peroxidase activity;binding;iron ion binding;antioxidant activity;oxidoreductase activity;oxidoreductase activity, acting on peroxide as acceptor;heme binding;ion binding;cation binding;metal ion binding;tetrapyrrole binding;transition metal ion binding		response to stress;response to oxidative stress;response to chemical stimulus;response to stimulus			peroxidase		Completeproteome;Heme;Iron;Metal-binding;Oxidoreductase;Peroxidase;Referenceproteome		GO:0006950;GO:0006979;GO:0042221;GO:0050896	GO:0003824;GO:0004601;GO:0005488;GO:0005506;GO:0016209;GO:0016491;GO:0016684;GO:0020037;GO:0043167;GO:0043169;GO:0046872;GO:0046906;GO:0046914		GO:0006950;GO:0006979;GO:0042221;GO:0050896		CADANIAG00003649	CADANIAP00003649	CADANIAT00003649			AN5440	IPR002207;IPR010255;IPR002016;IPR019794	Asc_peroxidase;Haem_peroxidase;Haem_peroxidase_pln/fun/bac;Peroxidases_AS					PF00141	PR00459;PR00458	ASPEROXIDASE;PEROXIDASE	PS00436;PS50873	PEROXIDASE_2;PEROXIDASE_4	Putative heme-binding peroxidase					Emericella nidulans (strain FGSC A4 / ATCC 38163 / CBS 112.46 / NRRL 194 / M139)	CCPR2_EMENI		1.11.1.-	COG0376
P0C8Q1;C8V7E8;Q5AU02		tRNA wobble base modification;tRNA wobble uridine modification;nucleobase-containing compound metabolic process;RNA processing;tRNA metabolic process;tRNA modification;nitrogen compound metabolic process;tRNA processing;metabolic process;biosynthetic process;RNA modification;cellular process;RNA metabolic process;iron-sulfur cluster assembly;metallo-sulfur cluster assembly;ncRNA processing;cellul…	nucleotide binding;binding;ATP binding;purine nucleotide binding;adenyl nucleotide binding;ribonucleotide binding;purine ribonucleotide binding;adenyl ribonucleotide binding;purine ribonucleoside triphosphate binding;ion binding;cation binding;metal ion binding;iron-sulfur cluster binding;4 iron, 4 sulfur cluster binding;metal cluster binding	nucleus;cytosol;organelle;membrane-bounded organelle;intracellular organelle;intracellular membrane-bounded organelle;intracellular part;cytoplasmic part;cell part	nucleobase-containing compound metabolic process;RNA processing;tRNA metabolic process;nitrogen compound metabolic process;tRNA processing;metabolic process;biosynthetic process;RNA modification;cellular process;RNA metabolic process;cellular nitrogen compound metabolic process;macromolecule metabolic process;macromolecule modification;cellular metabolic process;primary metabolic process;cofactor…	nucleus;cytosol;organelle;intracellular organelle;intracellular membrane-bounded organelle;cell part		MipZ;ParA		4Fe-4S;ATP-binding;Completeproteome;Cytoplasm;Iron;Iron-sulfur;Metal-binding;Nucleotide-binding;Referenceproteome		GO:0002097;GO:0002098;GO:0006139;GO:0006396;GO:0006399;GO:0006400;GO:0006807;GO:0008033;GO:0008152;GO:0009058;GO:0009451;GO:0009987;GO:0016070;GO:0016226;GO:0031163;GO:0034470;GO:0034641;GO:0034660;GO:0043170;GO:0043412;GO:0044237;GO:0044238;GO:0044249;GO:0044260;GO:0051186;GO:0051188;GO:0090304	GO:0000166;GO:0005488;GO:0005524;GO:0017076;GO:0030554;GO:0032553;GO:0032555;GO:0032559;GO:0035639;GO:0043167;GO:0043169;GO:0046872;GO:0051536;GO:0051539;GO:0051540	GO:0005634;GO:0005829;GO:0043226;GO:0043227;GO:0043229;GO:0043231;GO:0044424;GO:0044444;GO:0044464	GO:0006139;GO:0006396;GO:0006399;GO:0006807;GO:0008033;GO:0008152;GO:0009058;GO:0009451;GO:0009987;GO:0016070;GO:0034641;GO:0043170;GO:0043412;GO:0044237;GO:0044238;GO:0051186	GO:0005634;GO:0005829;GO:0043226;GO:0043229;GO:0043231;GO:0044464	CADANIAG00004278	CADANIAP00004278	CADANIAT00004278			cfd1	IPR015223;IPR019591;IPR028600;IPR027417	ATPase_MipZ/NubP2/Cfd1;Mrp/NBP35_ATP-bd;NUBP2/Cfd1_eukaryotes;P-loop_NTPase					PF09140;PF10609					Cytosolic Fe-S cluster assembly factor cfd1					Emericella nidulans (strain FGSC A4 / ATCC 38163 / CBS 112.46 / NRRL 194 / M139)	CFD1_EMENI			COG0489
G5EB30;C8V7G5		polysaccharide catabolic process;carbohydrate metabolic process;polysaccharide metabolic process;aminoglycan metabolic process;aminoglycan catabolic process;chitin metabolic process;chitin catabolic process;nitrogen compound metabolic process;metabolic process;catabolic process;macromolecule catabolic process;amine metabolic process;carbohydrate catabolic process;macromolecule metabolic process;p…	pattern binding;catalytic activity;hydrolase activity, hydrolyzing O-glycosyl compounds;chitinase activity;binding;chitin binding;endochitinase activity;hydrolase activity;hydrolase activity, acting on glycosyl bonds;carbohydrate binding;polysaccharide binding	extracellular region;cell wall;plasma membrane;membrane;external encapsulating structure;intrinsic to membrane;anchored to membrane;membrane part;cell part;cell tip;cell pole	carbohydrate metabolic process;polysaccharide metabolic process;nitrogen compound metabolic process;metabolic process;catabolic process;amine metabolic process;macromolecule metabolic process;primary metabolic process	extracellular region;cell wall;plasma membrane;membrane;external encapsulating structure;cell part	Amino sugar and nucleotide sugar metabolism	Glyco_hydro_18	AMINE_METABOLIC_PROCESS;AMINO_SUGAR_METABOLIC_PROCESS;ATM_DN.V1_DN;BIOPOLYMER_METABOLIC_PROCESS;BRUINS_UVC_RESPONSE_LATE;CARBOHYDRATE_BINDING;CARBOHYDRATE_METABOLIC_PROCESS;CELLULAR_CARBOHYDRATE_METABOLIC_PROCESS;CELLULAR_MACROMOLECULE_METABOLIC_PROCESS;CELLULAR_POLYSACCHARIDE_METABOLIC_PROCESS;chr1p13;GLUCOSAMINE_METABOLIC_PROCESS;GSE10239_MEMORY_VS_KLRG1INT_EFF_CD8_TCELL_UP;GSE11864_CSF1_IFNG_V…	Carbohydratemetabolism;Cellmembrane;Cellwall;Chitin-binding;Chitindegradation;Completeproteome;Glycoprotein;Glycosidase;GPI-anchor;Hydrolase;Lipoprotein;Membrane;Polysaccharidedegradation;Referenceproteome;Secreted;Signal		GO:0000272;GO:0005975;GO:0005976;GO:0006022;GO:0006026;GO:0006030;GO:0006032;GO:0006807;GO:0008152;GO:0009056;GO:0009057;GO:0009308;GO:0016052;GO:0043170;GO:0044238	GO:0001871;GO:0003824;GO:0004553;GO:0004568;GO:0005488;GO:0008061;GO:0008843;GO:0016787;GO:0016798;GO:0030246;GO:0030247	GO:0005576;GO:0005618;GO:0005886;GO:0016020;GO:0030312;GO:0031224;GO:0031225;GO:0044425;GO:0044464;GO:0051286;GO:0060187	GO:0005975;GO:0005976;GO:0006807;GO:0008152;GO:0009056;GO:0009308;GO:0043170;GO:0044238	GO:0005576;GO:0005618;GO:0005886;GO:0016020;GO:0030312;GO:0044464	CADANIAG00004295	CADANIAP00004295	CADANIAT00004295			chiA	IPR001223;IPR001579;IPR013781;IPR017853	Glyco_hydro18cat;Glyco_hydro_18_chit_AS;Glyco_hydro_catalytic_dom;Glycoside_hydrolase_SF	ko00520				PF00704			PS01095	CHITINASE_18	Endochitinase A					Emericella nidulans (strain FGSC A4 / ATCC 38163 / CBS 112.46 / NRRL 194 / M139)	CHIA1_EMENI		3.2.1.14
Q5BGP1;C8VUB2		nucleobase-containing compound metabolic process;RNA processing;mRNA processing;nitrogen compound metabolic process;metabolic process;RNA splicing;cellular process;RNA metabolic process;mRNA metabolic process;cellular nitrogen compound metabolic process;macromolecule metabolic process;cellular metabolic process;primary metabolic process;cellular macromolecule metabolic process;nucleic acid metabo…	nucleic acid binding;RNA binding;binding	spliceosomal complex;cytoplasm;ribonucleoprotein complex;macromolecular complex;organelle part;intracellular part;nuclear part;intracellular organelle part;cell part	nucleobase-containing compound metabolic process;RNA processing;mRNA processing;nitrogen compound metabolic process;metabolic process;RNA splicing;cellular process;RNA metabolic process;mRNA metabolic process;cellular nitrogen compound metabolic process;macromolecule metabolic process;cellular metabolic process;primary metabolic process	spliceosomal complex;cytoplasm;ribonucleoprotein complex;macromolecular complex;cell part		MA3;MIF4G	chr2q31;EIF4E_DN;FOSTER_KDM1A_TARGETS_DN;GSE11057_NAIVE_VS_CENT_MEMORY_CD4_TCELL_UP;GSE15930_NAIVE_VS_24H_IN_VITRO_STIM_IL12_CD8_TCELL_UP;GSE15930_NAIVE_VS_48H_IN_VITRO_STIM_CD8_TCELL_UP;GSE15930_NAIVE_VS_48H_IN_VITRO_STIM_IFNAB_CD8_TCELL_UP;GSE15930_NAIVE_VS_48H_IN_VITRO_STIM_IL12_CD8_TCELL_UP;GSE15930_NAIVE_VS_72H_IN_VITRO_STIM_IFNAB_CD8_TCELL_UP;GSE15930_NAIVE_VS_72H_IN_VITRO_STIM_IL12_CD8_TCE…	Completeproteome;Cytoplasm;mRNAprocessing;mRNAsplicing;Nucleus;Referenceproteome;Spliceosome		GO:0006139;GO:0006396;GO:0006397;GO:0006807;GO:0008152;GO:0008380;GO:0009987;GO:0016070;GO:0016071;GO:0034641;GO:0043170;GO:0044237;GO:0044238;GO:0044260;GO:0090304	GO:0003676;GO:0003723;GO:0005488	GO:0005681;GO:0005737;GO:0030529;GO:0032991;GO:0044422;GO:0044424;GO:0044428;GO:0044446;GO:0044464	GO:0006139;GO:0006396;GO:0006397;GO:0006807;GO:0008152;GO:0008380;GO:0009987;GO:0016070;GO:0016071;GO:0034641;GO:0043170;GO:0044237;GO:0044238	GO:0005681;GO:0005737;GO:0030529;GO:0032991;GO:0044464	CADANIAG00002431	CADANIAP00002431	CADANIAT00002431			cwc22	IPR016024;IPR003891;IPR016021;IPR003890	ARM-type_fold;Initiation_fac_eIF4g_MI;MIF4-like_typ_1/2/3;MIF4G-like_typ-3					PF02847;PF02854			PS51366	MI	Pre-mRNA-splicing factor cwc22			SM00544;SM00543	MA3;MIF4G	Emericella nidulans (strain FGSC A4 / ATCC 38163 / CBS 112.46 / NRRL 194 / M139)	CWC22_EMENI			NOG293831
Q5AUT0;C8V585;Q4QXR7		polysaccharide catabolic process;carbohydrate metabolic process;polysaccharide metabolic process;metabolic process;catabolic process;macromolecule catabolic process;carbohydrate catabolic process;macromolecule metabolic process;primary metabolic process;cell wall organization or biogenesis;cell wall organization;cellular component organization or biogenesis	catalytic activity;hydrolase activity, hydrolyzing O-glycosyl compounds;beta-glucosidase activity;glucosidase activity;hydrolase activity;hydrolase activity, acting on glycosyl bonds;glucan endo-1,3-beta-D-glucosidase activity	extracellular region;cell wall;plasma membrane;membrane;external encapsulating structure;intrinsic to membrane;anchored to membrane;membrane part;cell part	carbohydrate metabolic process;polysaccharide metabolic process;metabolic process;catabolic process;macromolecule metabolic process;primary metabolic process;cell wall organization or biogenesis;cell wall organization	extracellular region;cell wall;plasma membrane;membrane;external encapsulating structure;cell part				Carbohydratemetabolism;Cellmembrane;Cellwall;Cellwallbiogenesis/degradation;Completeproteome;Glycoprotein;GPI-anchor;Hydrolase;Lipoprotein;Membrane;Polysaccharidedegradation;Referenceproteome;Secreted;Signal		GO:0000272;GO:0005975;GO:0005976;GO:0008152;GO:0009056;GO:0009057;GO:0016052;GO:0043170;GO:0044238;GO:0071554;GO:0071555;GO:0071840	GO:0003824;GO:0004553;GO:0008422;GO:0015926;GO:0016787;GO:0016798;GO:0042973	GO:0005576;GO:0005618;GO:0005886;GO:0016020;GO:0030312;GO:0031224;GO:0031225;GO:0044425;GO:0044464	GO:0005975;GO:0005976;GO:0008152;GO:0009056;GO:0043170;GO:0044238;GO:0071554;GO:0071555	GO:0005576;GO:0005618;GO:0005886;GO:0016020;GO:0030312;GO:0044464	CADANIAG00003968	CADANIAP00003968	CADANIAT00003968			eglC	IPR013781;IPR017853	Glyco_hydro_catalytic_dom;Glycoside_hydrolase_SF										Probable glucan endo-1,3-beta-glucosidase eglC					Emericella nidulans (strain FGSC A4 / ATCC 38163 / CBS 112.46 / NRRL 194 / M139)	EGLC_EMENI		3.2.1.39	COG5309
C8V330;Q5B0B3		formation of translation preinitiation complex;cytoplasmic translational initiation;translation reinitiation;translational initiation;regulation of translation;regulation of translational initiation;regulation of biosynthetic process;cellular process;regulation of gene expression;regulation of macromolecule biosynthetic process;posttranscriptional regulation of gene expression;cellular component …	nucleotide binding;nucleic acid binding;RNA binding;translation initiation factor activity;binding;translation factor activity, nucleic acid binding	nucleus;cytosol;eukaryotic translation initiation factor 3 complex;eukaryotic 43S preinitiation complex;ribonucleoprotein complex;macromolecular complex;eukaryotic 48S preinitiation complex;organelle;membrane-bounded organelle;intracellular organelle;intracellular membrane-bounded organelle;protein complex;multi-eIF complex;intracellular part;cytoplasmic part;cell part;translation preinitiation c…	translational initiation;regulation of translation;cellular process;cellular component organization;cellular component assembly;ribonucleoprotein complex assembly;cellular macromolecular complex assembly;macromolecular complex assembly;biological regulation	nucleus;cytosol;ribonucleoprotein complex;macromolecular complex;organelle;intracellular organelle;intracellular membrane-bounded organelle;protein complex;cell part		eIF3g;RRM_1		Completeproteome;Cytoplasm;Initiationfactor;Proteinbiosynthesis;Referenceproteome;RNA-binding		GO:0001731;GO:0002183;GO:0002188;GO:0006413;GO:0006417;GO:0006446;GO:0009889;GO:0009987;GO:0010468;GO:0010556;GO:0010608;GO:0016043;GO:0019222;GO:0022607;GO:0022618;GO:0031323;GO:0031326;GO:0032268;GO:0034621;GO:0034622;GO:0043933;GO:0050789;GO:0050794;GO:0051246;GO:0060255;GO:0065003;GO:0065007;GO:0071826;GO:0071840;GO:0071841;GO:0071842;GO:0071844;GO:0080090;GO:2000112	GO:0000166;GO:0003676;GO:0003723;GO:0003743;GO:0005488;GO:0008135	GO:0005634;GO:0005829;GO:0005852;GO:0016282;GO:0030529;GO:0032991;GO:0033290;GO:0043226;GO:0043227;GO:0043229;GO:0043231;GO:0043234;GO:0043614;GO:0044424;GO:0044444;GO:0044464;GO:0070993;GO:0071540;GO:0071541	GO:0006413;GO:0006417;GO:0009987;GO:0016043;GO:0022607;GO:0022618;GO:0034622;GO:0065003;GO:0065007	GO:0005634;GO:0005829;GO:0030529;GO:0032991;GO:0043226;GO:0043229;GO:0043231;GO:0043234;GO:0044464	CADANIAG00007002	CADANIAP00007002	CADANIAT00007002			tif35	IPR017334;IPR024675;IPR012677;IPR000504	eIF3_g;eIF3g_N;Nucleotide-bd_a/b_plait;RRM_dom					PF12353;PF00076			PS50102	RRM	Eukaryotic translation initiation factor 3 subunit G			SM00360	RRM	Emericella nidulans (strain FGSC A4 / ATCC 38163 / CBS 112.46 / NRRL 194 / M139)	EIF3G_EMENI
Q5AYR3;C8V0V0		nucleobase-containing compound metabolic process;DNA metabolic process;DNA repair;transcription, DNA-dependent;regulation of transcription, DNA-dependent;regulation of transcription from RNA polymerase II promoter;nitrogen compound metabolic process;response to stress;response to DNA damage stimulus;cell cycle;metabolic process;biosynthetic process;macromolecule biosynthetic process;regulation of…	catalytic activity;histone acetyltransferase activity;lysine N-acetyltransferase activity;N-acetyltransferase activity;acetyltransferase activity;N-acyltransferase activity;transferase activity;transferase activity, transferring acyl groups;transferase activity, transferring acyl groups other than amino-acyl groups	histone acetyltransferase complex;Piccolo NuA4 histone acetyltransferase complex;macromolecular complex;H4/H2A histone acetyltransferase complex;protein complex;organelle part;intracellular part;nuclear part;intracellular organelle part;nucleoplasm part;cell part	nucleobase-containing compound metabolic process;DNA metabolic process;DNA repair;nitrogen compound metabolic process;response to stress;response to DNA damage stimulus;cell cycle;metabolic process;biosynthetic process;cellular process;RNA metabolic process;cellular nitrogen compound metabolic process;macromolecule metabolic process;cellular metabolic process;primary metabolic process;response to…	macromolecular complex;protein complex;cell part		EPL1		Cellcycle;Completeproteome;DNAdamage;DNArepair;Nucleus;Referenceproteome;Transcription;Transcriptionregulation		GO:0006139;GO:0006259;GO:0006281;GO:0006351;GO:0006355;GO:0006357;GO:0006807;GO:0006950;GO:0006974;GO:0007049;GO:0008152;GO:0009058;GO:0009059;GO:0009889;GO:0009893;GO:0009894;GO:0009896;GO:0009987;GO:0010468;GO:0010506;GO:0010508;GO:0010556;GO:0010646;GO:0010647;GO:0016070;GO:0016239;GO:0016241;GO:0019219;GO:0019222;GO:0031323;GO:0031325;GO:0031326;GO:0031329;GO:0031331;GO:0032101;GO:0032103;GO:…	GO:0003824;GO:0004402;GO:0004468;GO:0008080;GO:0016407;GO:0016410;GO:0016740;GO:0016746;GO:0016747	GO:0000123;GO:0032777;GO:0032991;GO:0043189;GO:0043234;GO:0044422;GO:0044424;GO:0044428;GO:0044446;GO:0044451;GO:0044464	GO:0006139;GO:0006259;GO:0006281;GO:0006807;GO:0006950;GO:0006974;GO:0007049;GO:0008152;GO:0009058;GO:0009987;GO:0016070;GO:0034641;GO:0043170;GO:0044237;GO:0044238;GO:0050896;GO:0065007	GO:0032991;GO:0043234;GO:0044464	CADANIAG00007341	CADANIAP00007341	CADANIAT00007341			epl1	IPR024943;IPR019542	Enhancer_polycomb;Enhancer_polycomb-like_N					PF10513					Enhancer of polycomb-like protein 1					Emericella nidulans (strain FGSC A4 / ATCC 38163 / CBS 112.46 / NRRL 194 / M139)	EPL1_EMENI			NOG304124
Q5BDL3;C8VRW2		maturation of 5.8S rRNA;maturation of LSU-rRNA from tricistronic rRNA transcript (SSU-rRNA, 5.8S rRNA, LSU-rRNA);maturation of 5.8S rRNA from tricistronic rRNA transcript (SSU-rRNA, 5.8S rRNA, LSU-rRNA);maturation of LSU-rRNA;nucleobase-containing compound metabolic process;rRNA processing;RNA processing;nitrogen compound metabolic process;metabolic process;cellular process;RNA metabolic process;…	binding;ribonucleoprotein binding	nucleoplasm;ribonucleoprotein complex;preribosome;preribosome, large subunit precursor;macromolecular complex;protein complex;organelle part;intracellular part;nuclear part;intracellular organelle part;nucleolar part;cell part;PeBoW complex	nucleobase-containing compound metabolic process;rRNA processing;RNA processing;nitrogen compound metabolic process;metabolic process;cellular process;RNA metabolic process;cellular nitrogen compound metabolic process;macromolecule metabolic process;cellular metabolic process;primary metabolic process	nucleoplasm;ribonucleoprotein complex;preribosome;macromolecular complex;protein complex;cell part		BOP1NT;WD40		Completeproteome;Nucleus;Referenceproteome;Repeat;Ribosomebiogenesis;rRNAprocessing;WDrepeat		GO:0000460;GO:0000463;GO:0000466;GO:0000470;GO:0006139;GO:0006364;GO:0006396;GO:0006807;GO:0008152;GO:0009987;GO:0016070;GO:0016072;GO:0034470;GO:0034641;GO:0034660;GO:0043170;GO:0044237;GO:0044238;GO:0044260;GO:0090304	GO:0005488;GO:0043021	GO:0005654;GO:0030529;GO:0030684;GO:0030687;GO:0032991;GO:0043234;GO:0044422;GO:0044424;GO:0044428;GO:0044446;GO:0044452;GO:0044464;GO:0070545	GO:0006139;GO:0006364;GO:0006396;GO:0006807;GO:0008152;GO:0009987;GO:0016070;GO:0034641;GO:0043170;GO:0044237;GO:0044238	GO:0005654;GO:0030529;GO:0030684;GO:0032991;GO:0043234;GO:0044464	CADANIAG00001244	CADANIAP00001244	CADANIAT00001244			erb1	IPR028598;IPR012953;IPR015943;IPR001680;IPR019775;IPR017986	BOP1/Erb1;BOP1_N_dom;WD40/YVTN_repeat-like_dom;WD40_repeat;WD40_repeat_CS;WD40_repeat_dom					PF08145;PF00400			PS00678;PS50082;PS50294	WD_REPEATS_1;WD_REPEATS_2;WD_REPEATS_REGION	Ribosome biogenesis protein erb1			SM01035;SM00320	BOP1NT;WD40	Emericella nidulans (strain FGSC A4 / ATCC 38163 / CBS 112.46 / NRRL 194 / M139)	ERB1_EMENI			NOG270818
Q5B948;C8VJ49		nucleobase-containing compound metabolic process;translational initiation;nitrogen compound metabolic process;metabolic process;cellular process;regulation of gene expression;RNA secondary structure unwinding;RNA metabolic process;regulation of metabolic process;cellular nitrogen compound metabolic process;macromolecule metabolic process;cellular metabolic process;primary metabolic process;cellul…	nucleotide binding;nucleic acid binding;RNA binding;RNA helicase activity;translation initiation factor activity;catalytic activity;ATP-dependent RNA helicase activity;helicase activity;binding;ATP binding;ATP-dependent helicase activity;translation factor activity, nucleic acid binding;RNA-dependent ATPase activity;pyrophosphatase activity;hydrolase activity;hydrolase activity, acting on acid an…	nucleolus;cytoplasm;cytosol;organelle;non-membrane-bounded organelle;intracellular organelle;intracellular non-membrane-bounded organelle;organelle part;intracellular part;nuclear part;cytoplasmic part;intracellular organelle part;cell part	nucleobase-containing compound metabolic process;translational initiation;nitrogen compound metabolic process;metabolic process;cellular process;RNA metabolic process;cellular nitrogen compound metabolic process;macromolecule metabolic process;cellular metabolic process;primary metabolic process;biological regulation	nucleolus;cytoplasm;cytosol;organelle;intracellular organelle;intracellular non-membrane-bounded organelle;cell part	RNA transport	DEAD;Helicase_C		ATP-binding;Completeproteome;Cytoplasm;Helicase;Hydrolase;Initiationfactor;Nucleotide-binding;Proteinbiosynthesis;Referenceproteome;RNA-binding		GO:0006139;GO:0006413;GO:0006807;GO:0008152;GO:0009987;GO:0010468;GO:0010501;GO:0016070;GO:0019222;GO:0034641;GO:0043170;GO:0044237;GO:0044238;GO:0044260;GO:0050789;GO:0060255;GO:0065007;GO:0090304	GO:0000166;GO:0003676;GO:0003723;GO:0003724;GO:0003743;GO:0003824;GO:0004004;GO:0004386;GO:0005488;GO:0005524;GO:0008026;GO:0008135;GO:0008186;GO:0016462;GO:0016787;GO:0016817;GO:0016818;GO:0016887;GO:0017076;GO:0017111;GO:0030554;GO:0032553;GO:0032555;GO:0032559;GO:0035639;GO:0042623;GO:0070035	GO:0005730;GO:0005737;GO:0005829;GO:0043226;GO:0043228;GO:0043229;GO:0043232;GO:0044422;GO:0044424;GO:0044428;GO:0044444;GO:0044446;GO:0044464	GO:0006139;GO:0006413;GO:0006807;GO:0008152;GO:0009987;GO:0016070;GO:0034641;GO:0043170;GO:0044237;GO:0044238;GO:0065007	GO:0005730;GO:0005737;GO:0005829;GO:0043226;GO:0043229;GO:0043232;GO:0044464	CADANIAG00010155	CADANIAP00010155	CADANIAT00010155			tif1	IPR011545;IPR014001;IPR001650;IPR027417;IPR000629;IPR014014	DEAD/DEAH_box_helicase_dom;Helicase_ATP-bd;Helicase_C;P-loop_NTPase;RNA-helicase_DEAD-box_CS;RNA_helicase_DEAD_Q_motif	ko03013				PF00270;PF00271			PS00039;PS51192;PS51194;PS51195	DEAD_ATP_HELICASE;HELICASE_ATP_BIND_1;HELICASE_CTER;Q_MOTIF	ATP-dependent RNA helicase eIF4A			SM00487;SM00490	DEXDc;HELICc	Emericella nidulans (strain FGSC A4 / ATCC 38163 / CBS 112.46 / NRRL 194 / M139)	IF4A_EMENI		3.6.4.13	COG0513
Q870L3;C8VBG2;Q5AW45		transport;ion transport;response to stress;cell communication;cellular response to starvation;response to external stimulus;cellular process;response to extracellular stimulus;cellular response to iron ion starvation;response to nutrient levels;cellular response to extracellular stimulus;cellular response to nutrient levels;cellular response to stress;homeostatic process;response to starvation;ch…		integral to membrane;intrinsic to membrane;membrane part;cell part	transport;ion transport;response to stress;cell communication;response to external stimulus;cellular process;response to extracellular stimulus;homeostatic process;response to starvation;response to stimulus;establishment of localization;transmembrane transport;biological regulation	cell part		MFS_1		Completeproteome;Iontransport;Iron;Irontransport;Membrane;Referenceproteome;Transmembrane;Transmembranehelix;Transport		GO:0006810;GO:0006811;GO:0006950;GO:0007154;GO:0009267;GO:0009605;GO:0009987;GO:0009991;GO:0010106;GO:0031667;GO:0031668;GO:0031669;GO:0033554;GO:0042592;GO:0042594;GO:0048878;GO:0050801;GO:0050896;GO:0051234;GO:0051716;GO:0055072;GO:0055080;GO:0055085;GO:0065007;GO:0065008;GO:0071496		GO:0016021;GO:0031224;GO:0044425;GO:0044464	GO:0006810;GO:0006811;GO:0006950;GO:0007154;GO:0009605;GO:0009987;GO:0009991;GO:0042592;GO:0042594;GO:0050896;GO:0051234;GO:0055085;GO:0065007	GO:0044464	CADANIAG00000579	CADANIAP00000579	CADANIAT00000579			mirC	IPR011701;IPR020846	MFS;MFS_dom					PF07690			PS50850	MFS	Siderophore iron transporter mirC					Emericella nidulans (strain FGSC A4 / ATCC 38163 / CBS 112.46 / NRRL 194 / M139)	MIRC_EMENI			NOG281153
Q9Y8C2;C8VK56;Q5ARD7		cellular aromatic compound metabolic process;coenzyme metabolic process;Mo-molybdopterin cofactor biosynthetic process;nitrogen compound metabolic process;metabolic process;biosynthetic process;coenzyme biosynthetic process;cellular process;heterocycle biosynthetic process;aromatic compound biosynthetic process;Mo-molybdopterin cofactor metabolic process;molybdopterin cofactor biosynthetic proces…	nucleotide binding;catalytic activity;binding;Mo-molybdopterin synthase activity	cytosol;molybdopterin synthase complex;macromolecular complex;protein complex;intracellular part;cytoplasmic part;cell part	cellular aromatic compound metabolic process;nitrogen compound metabolic process;metabolic process;biosynthetic process;cellular process;cellular nitrogen compound metabolic process;cellular metabolic process;heterocycle metabolic process;cofactor metabolic process;prosthetic group metabolic process	cytosol;macromolecular complex;protein complex;cell part		ThiS		Completeproteome;Cytoplasm;Molybdenumcofactorbiosynthesis;Nucleotide-binding;Phosphoprotein;Referenceproteome		GO:0006725;GO:0006732;GO:0006777;GO:0006807;GO:0008152;GO:0009058;GO:0009108;GO:0009987;GO:0018130;GO:0019438;GO:0019720;GO:0032324;GO:0034641;GO:0042558;GO:0042559;GO:0043545;GO:0044237;GO:0044249;GO:0044271;GO:0046483;GO:0051186;GO:0051188;GO:0051189;GO:0055114	GO:0000166;GO:0003824;GO:0005488;GO:0030366	GO:0005829;GO:0019008;GO:0032991;GO:0043234;GO:0044424;GO:0044444;GO:0044464	GO:0006725;GO:0006807;GO:0008152;GO:0009058;GO:0009987;GO:0034641;GO:0044237;GO:0046483;GO:0051186;GO:0051189	GO:0005829;GO:0032991;GO:0043234;GO:0044464	CADANIAG00009465	CADANIAP00009465	CADANIAT00009465			cnxG	IPR012675;IPR028887;IPR016155;IPR003749	Beta-grasp_dom;MOCS2A;Mopterin_synth/thiamin_S_b;ThiS/MoaD					PF02597					Molybdopterin synthase sulfur carrier subunit					Emericella nidulans (strain FGSC A4 / ATCC 38163 / CBS 112.46 / NRRL 194 / M139)	MOC2A_EMENI			NOG274973
Q5B0D6;C8V3A0		nucleobase-containing compound metabolic process;coenzyme metabolic process;oxidoreduction coenzyme metabolic process;nucleoside phosphate metabolic process;nitrogen compound metabolic process;metabolic process;nucleotide metabolic process;cellular process;pyridine nucleotide metabolic process;cellular nitrogen compound metabolic process;cellular metabolic process;primary metabolic process;small …	nucleotide binding;catalytic activity;binding;ATP binding;lyase activity;carbon-oxygen lyase activity;hydro-lyase activity;purine nucleotide binding;adenyl nucleotide binding;ribonucleotide binding;purine ribonucleotide binding;adenyl ribonucleotide binding;purine ribonucleoside triphosphate binding;ATP-dependent NAD(P)H-hydrate dehydratase activity	cytosol;intracellular part;cytoplasmic part;cell part	nucleobase-containing compound metabolic process;nitrogen compound metabolic process;metabolic process;nucleotide metabolic process;cellular process;cellular nitrogen compound metabolic process;cellular metabolic process;primary metabolic process;small molecule metabolic process;heterocycle metabolic process;cofactor metabolic process;nucleobase-containing small molecule metabolic process	cytosol;cell part		Carb_kinase		ATP-binding;Completeproteome;Cytoplasm;Lyase;NAD;NADP;Nucleotide-binding;Phosphoprotein;Referenceproteome		GO:0006139;GO:0006732;GO:0006733;GO:0006753;GO:0006807;GO:0008152;GO:0009117;GO:0009987;GO:0019362;GO:0034641;GO:0044237;GO:0044238;GO:0044281;GO:0046483;GO:0046496;GO:0051186;GO:0055086;GO:0072524	GO:0000166;GO:0003824;GO:0005488;GO:0005524;GO:0016829;GO:0016835;GO:0016836;GO:0017076;GO:0030554;GO:0032553;GO:0032555;GO:0032559;GO:0035639;GO:0047453	GO:0005829;GO:0044424;GO:0044444;GO:0044464	GO:0006139;GO:0006807;GO:0008152;GO:0009117;GO:0009987;GO:0034641;GO:0044237;GO:0044238;GO:0044281;GO:0046483;GO:0051186;GO:0055086	GO:0005829;GO:0044464	CADANIAG00007024	CADANIAP00007024	CADANIAT00007024			AN5994	IPR017953;IPR000631;IPR029056	Carbohydrate_kinase_pred_CS;CARKD;Ribokinase-like					PF01256			PS01050;PS51383	YJEF_C_2;YJEF_C_3	ATP-dependent (S)-NAD(P)H-hydrate dehydratase					Emericella nidulans (strain FGSC A4 / ATCC 38163 / CBS 112.46 / NRRL 194 / M139)	NNRD_EMENI		4.2.1.93	COG0063
P78612;C8VPQ7;Q5BC86		invasive growth in response to glucose limitation;organic acid metabolic process;sulfur compound metabolic process;nitrogen compound metabolic process;meiosis;metabolic process;biosynthetic process;response to pH;amine metabolic process;response to abiotic stimulus;cellular process;organic acid biosynthetic process;protein processing;antibiotic metabolic process;antibiotic biosynthetic process;dr…		internal side of plasma membrane;membrane part;plasma membrane part;cell part	invasive growth in response to glucose limitation;organic acid metabolic process;sulfur compound metabolic process;nitrogen compound metabolic process;meiosis;metabolic process;biosynthetic process;amine metabolic process;response to abiotic stimulus;cellular process;drug metabolic process;protein metabolic process;filamentous growth;cellular nitrogen compound metabolic process;growth;cellular ke…	cell part		Arrestin_N		Completeproteome;Referenceproteome		GO:0001403;GO:0006082;GO:0006790;GO:0006807;GO:0007126;GO:0008152;GO:0009058;GO:0009268;GO:0009308;GO:0009628;GO:0009987;GO:0016053;GO:0016485;GO:0016999;GO:0017000;GO:0017144;GO:0018130;GO:0019538;GO:0019752;GO:0022402;GO:0022403;GO:0030447;GO:0030653;GO:0030654;GO:0034641;GO:0040007;GO:0042180;GO:0042316;GO:0042318;GO:0043170;GO:0043436;GO:0043603;GO:0043604;GO:0044106;GO:0044182;GO:0044237;GO:…		GO:0009898;GO:0044425;GO:0044459;GO:0044464	GO:0001403;GO:0006082;GO:0006790;GO:0006807;GO:0007126;GO:0008152;GO:0009058;GO:0009308;GO:0009628;GO:0009987;GO:0017144;GO:0019538;GO:0030447;GO:0034641;GO:0040007;GO:0042180;GO:0043170;GO:0043603;GO:0044237;GO:0044238;GO:0044281;GO:0046483;GO:0050896;GO:0051604;GO:0070783	GO:0044464	CADANIAG00008495	CADANIAP00008495	CADANIAT00008495			palF	IPR011021;IPR011022;IPR014756	Arrestin-like_N;Arrestin_C-like;Ig_E-set					PF00339					pH-response regulator protein palF/RIM8			SM01017	Arrestin_C	Emericella nidulans (strain FGSC A4 / ATCC 38163 / CBS 112.46 / NRRL 194 / M139)	PALF_EMENI			NOG246894
C8VTR5;Q5BGF9		protein targeting;protein targeting to mitochondrion;transport;mitochondrial transport;intracellular protein transport;cellular process;protein transport;protein import;protein import into mitochondrial matrix;establishment of protein localization;intracellular transport;establishment of localization;establishment of localization in cell;transmembrane transport;intracellular protein transmembrane…		presequence translocase-associated import motor;integral to membrane;intrinsic to membrane;macromolecular complex;protein complex;organelle part;intracellular part;membrane part;mitochondrial part;cytoplasmic part;intracellular organelle part;mitochondrial membrane part;cell part	protein targeting;transport;cellular process;protein transport;establishment of localization;transmembrane transport	macromolecular complex;protein complex;cell part		Pam17		Completeproteome;Membrane;Mitochondrion;Mitochondrioninnermembrane;Proteintransport;Referenceproteome;Transitpeptide;Translocation;Transmembrane;Transmembranehelix;Transport		GO:0006605;GO:0006626;GO:0006810;GO:0006839;GO:0006886;GO:0009987;GO:0015031;GO:0017038;GO:0030150;GO:0045184;GO:0046907;GO:0051234;GO:0051649;GO:0055085;GO:0065002;GO:0071806;GO:0072594;GO:0072655		GO:0001405;GO:0016021;GO:0031224;GO:0032991;GO:0043234;GO:0044422;GO:0044424;GO:0044425;GO:0044429;GO:0044444;GO:0044446;GO:0044455;GO:0044464	GO:0006605;GO:0006810;GO:0009987;GO:0015031;GO:0051234;GO:0055085	GO:0032991;GO:0043234;GO:0044464	CADANIAG00002331	CADANIAP00002331	CADANIAT00002331			pam17	IPR013875	Pam17					PF08566					Presequence translocated-associated motor subunit pam17, mitochondrial					Emericella nidulans (strain FGSC A4 / ATCC 38163 / CBS 112.46 / NRRL 194 / M139)	PAM17_EMENI
Q5B0M9;C8UZV0		double-strand break repair via homologous recombination;recombinational repair;double-strand break repair via break-induced replication;nucleobase-containing compound metabolic process;DNA metabolic process;DNA repair;double-strand break repair;DNA recombination;nitrogen compound metabolic process;response to stress;response to DNA damage stimulus;chromosome segregation;metabolic process;cellular…		GINS complex;cytosol;replication fork protection complex;macromolecular complex;protein complex;organelle part;intracellular part;chromosomal part;nuclear part;cytoplasmic part;intracellular organelle part;nuclear chromosome part;cell part	nucleobase-containing compound metabolic process;DNA metabolic process;DNA repair;DNA recombination;nitrogen compound metabolic process;response to stress;response to DNA damage stimulus;chromosome segregation;metabolic process;cellular process;DNA geometric change;cellular nitrogen compound metabolic process;macromolecule metabolic process;cellular metabolic process;primary metabolic process;res…	cytosol;macromolecular complex;protein complex;cell part		Sld5		Chromosomepartition;Completeproteome;DNAreplication;Nucleus;Referenceproteome		GO:0000724;GO:0000725;GO:0000727;GO:0006139;GO:0006259;GO:0006281;GO:0006302;GO:0006310;GO:0006807;GO:0006950;GO:0006974;GO:0007059;GO:0008152;GO:0009987;GO:0032392;GO:0032508;GO:0033554;GO:0034641;GO:0043170;GO:0044237;GO:0044238;GO:0044260;GO:0045132;GO:0050896;GO:0051716;GO:0071103;GO:0090304		GO:0000811;GO:0005829;GO:0031298;GO:0032991;GO:0043234;GO:0044422;GO:0044424;GO:0044427;GO:0044428;GO:0044444;GO:0044446;GO:0044454;GO:0044464	GO:0006139;GO:0006259;GO:0006281;GO:0006310;GO:0006807;GO:0006950;GO:0006974;GO:0007059;GO:0008152;GO:0009987;GO:0032392;GO:0034641;GO:0043170;GO:0044237;GO:0044238;GO:0050896	GO:0005829;GO:0032991;GO:0043234;GO:0044464	CADANIAG00007132	CADANIAP00007132	CADANIAT00007132			psf2	IPR029058;IPR021151;IPR007257	AB_hydrolase;GINS_complex;GINS_Psf2					PF05916					DNA replication complex GINS protein psf2					Emericella nidulans (strain FGSC A4 / ATCC 38163 / CBS 112.46 / NRRL 194 / M139)	PSF2_EMENI			NOG137511
P28346;C8V9N5;Q5ASC7		developmental process involved in reproduction;cellular cell wall organization;cellular process;cellular component assembly involved in morphogenesis;cellular component organization;reproductive process;cellular component assembly;developmental process;asexual spore wall assembly;spore wall assembly;external encapsulating structure organization;cellular process involved in reproduction;anatomical…	structural molecule activity;structural constituent of cell wall	extracellular region;cell wall;fungal-type cell wall;external encapsulating structure;spore wall;cell part	cellular cell wall organization;cellular process;cellular component organization;cellular component assembly;developmental process;external encapsulating structure organization;anatomical structure formation involved in morphogenesis;cellular cell wall organization or biogenesis;cell wall organization or biogenesis;cell wall organization	extracellular region;cell wall;external encapsulating structure;cell part		Hydrophobin		Cellwall;Cellwallbiogenesis/degradation;Completeproteome;Disulfidebond;Glycoprotein;Referenceproteome;Secreted;Signal		GO:0003006;GO:0007047;GO:0009987;GO:0010927;GO:0016043;GO:0022414;GO:0022607;GO:0032502;GO:0042243;GO:0042244;GO:0045229;GO:0048610;GO:0048646;GO:0070726;GO:0070882;GO:0071554;GO:0071555;GO:0071840;GO:0071841;GO:0071842;GO:0071844	GO:0005198;GO:0005199	GO:0005576;GO:0005618;GO:0009277;GO:0030312;GO:0031160;GO:0044464	GO:0007047;GO:0009987;GO:0016043;GO:0022607;GO:0032502;GO:0045229;GO:0048646;GO:0070882;GO:0071554;GO:0071555	GO:0005576;GO:0005618;GO:0030312;GO:0044464	CADANIAG00006259	CADANIAP00006259	CADANIAT00006259			rodA	IPR001338;IPR019778	Hydrophobin;Hydrophobin_CS					PF01185			PS00956	HYDROPHOBIN	Rodlet protein			SM00075	HYDRO	Emericella nidulans (strain FGSC A4 / ATCC 38163 / CBS 112.46 / NRRL 194 / M139)	RODL_EMENI			NOG238723
Q5B4U6;C8V8Q5			structural constituent of ribosome;structural molecule activity	organellar small ribosomal subunit;mitochondrial small ribosomal subunit;small ribosomal subunit;ribonucleoprotein complex;macromolecular complex;organelle part;intracellular part;mitochondrial part;cytoplasmic part;intracellular organelle part;cell part		small ribosomal subunit;ribonucleoprotein complex;macromolecular complex;cell part		MRP-S25		Completeproteome;Mitochondrion;Referenceproteome;Ribonucleoprotein;Ribosomalprotein			GO:0003735;GO:0005198	GO:0000314;GO:0005763;GO:0015935;GO:0030529;GO:0032991;GO:0044422;GO:0044424;GO:0044429;GO:0044444;GO:0044446;GO:0044464		GO:0015935;GO:0030529;GO:0032991;GO:0044464	CADANIAG00006020	CADANIAP00006020	CADANIAT00006020			rsm25	IPR016939	Mt__Rbsml_prot_S25					PF13741					37S ribosomal protein S25, mitochondrial					Emericella nidulans (strain FGSC A4 / ATCC 38163 / CBS 112.46 / NRRL 194 / M139)	RT25_EMENI			NOG84226
Q5BAX8;C8VN50;Q92229		regulation of DNA recombination;G1/S transition of mitotic cell cycle;G2/M transition of mitotic cell cycle;cytokinesis after mitosis;cytokinesis;septin ring assembly;protein complex assembly;protein modification process;proteolysis;ubiquitin-dependent protein catabolic process;sulfur compound metabolic process;cellular ion homeostasis;regulation of pH;organelle organization;nuclear envelope orga…	nucleic acid binding;DNA binding;DNA replication origin binding;binding;sequence-specific DNA binding	ubiquitin ligase complex;nuclear ubiquitin ligase complex;cytosol;single-stranded DNA-dependent ATP-dependent DNA helicase complex;SCF ubiquitin ligase complex;cullin-RING ubiquitin ligase complex;CBF3 complex;macromolecular complex;DNA helicase complex;nuclear SCF ubiquitin ligase complex;protein complex;RAVE complex;organelle part;intracellular part;chromosomal part;nuclear part;cytoplasmic par…	cytokinesis;protein complex assembly;protein modification process;proteolysis;sulfur compound metabolic process;cellular ion homeostasis;organelle organization;regulation of mitotic cell cycle;metabolic process;catabolic process;cellular process;cellular component organization;cellular membrane organization;protein metabolic process;cellular homeostasis;cellular component assembly;regulation of o…	ubiquitin ligase complex;cytosol;macromolecular complex;DNA helicase complex;protein complex;cell part	Cell cycle;Cell cycle - yeast;Oocyte meiosis;Ubiquitin mediated proteolysis;Protein processing in endoplasmic reticulum;Wnt signaling pathway;TGF-beta signaling pathway;Circadian rhythm - mammal	Skp1;Skp1_POZ		Completeproteome;Referenceproteome;Ublconjugationpathway		GO:0000018;GO:0000082;GO:0000086;GO:0000281;GO:0000910;GO:0000921;GO:0006461;GO:0006464;GO:0006508;GO:0006511;GO:0006790;GO:0006873;GO:0006885;GO:0006996;GO:0006998;GO:0007035;GO:0007088;GO:0007096;GO:0007346;GO:0008152;GO:0009056;GO:0009057;GO:0009987;GO:0010458;GO:0010498;GO:0010564;GO:0010639;GO:0010948;GO:0016043;GO:0016044;GO:0016567;GO:0019219;GO:0019222;GO:0019538;GO:0019725;GO:0019941;GO:…	GO:0003676;GO:0003677;GO:0003688;GO:0005488;GO:0043565	GO:0000151;GO:0000152;GO:0005829;GO:0017117;GO:0019005;GO:0031461;GO:0031518;GO:0032991;GO:0033202;GO:0043224;GO:0043234;GO:0043291;GO:0044422;GO:0044424;GO:0044427;GO:0044428;GO:0044444;GO:0044446;GO:0044464	GO:0000910;GO:0006461;GO:0006464;GO:0006508;GO:0006790;GO:0006873;GO:0006996;GO:0007346;GO:0008152;GO:0009056;GO:0009987;GO:0016043;GO:0016044;GO:0019538;GO:0019725;GO:0022607;GO:0033043;GO:0034622;GO:0042592;GO:0043170;GO:0043412;GO:0044237;GO:0044238;GO:0051052;GO:0051276;GO:0051603;GO:0051726;GO:0061024;GO:0065003;GO:0065007;GO:0070647;GO:0070925	GO:0000151;GO:0005829;GO:0032991;GO:0033202;GO:0043234;GO:0044464	CADANIAG00008995	CADANIAP00008995	CADANIAT00008995			sconC	IPR011333;IPR016897;IPR001232;IPR016072;IPR016073	BTB/POZ_fold;SKP1;SKP1-like;Skp1_comp_dimer;Skp1_comp_POZ	ko04110;ko04111;ko04114;ko04120;ko04141;ko04310;ko04350;ko04710				PF01466;PF03931					E3 ubiquitin ligase complex SCF subunit sconC			SM00512	Skp1	Emericella nidulans (strain FGSC A4 / ATCC 38163 / CBS 112.46 / NRRL 194 / M139)	SKP1_EMENI			COG5201
Q5BCN2;C8VNU8		nucleobase-containing compound metabolic process;transcription, DNA-dependent;regulation of transcription, DNA-dependent;regulation of transcription from RNA polymerase II promoter;RNA processing;mRNA processing;nitrogen compound metabolic process;metabolic process;biosynthetic process;macromolecule biosynthetic process;regulation of biosynthetic process;cellular process;regulation of gene expres…		nucleus;organelle;membrane-bounded organelle;intracellular organelle;intracellular membrane-bounded organelle;intracellular part;cell part	nucleobase-containing compound metabolic process;RNA processing;mRNA processing;nitrogen compound metabolic process;metabolic process;biosynthetic process;cellular process;RNA metabolic process;mRNA metabolic process;cellular nitrogen compound metabolic process;macromolecule metabolic process;cellular metabolic process;primary metabolic process;biological regulation	nucleus;organelle;intracellular organelle;intracellular membrane-bounded organelle;cell part		Spt5-NGN;Spt5_N		Completeproteome;mRNAprocessing;Nucleus;Referenceproteome;Transcription		GO:0006139;GO:0006351;GO:0006355;GO:0006357;GO:0006396;GO:0006397;GO:0006807;GO:0008152;GO:0009058;GO:0009059;GO:0009889;GO:0009987;GO:0010468;GO:0010556;GO:0016070;GO:0016071;GO:0019219;GO:0019222;GO:0031323;GO:0031326;GO:0032774;GO:0032784;GO:0034641;GO:0034645;GO:0043170;GO:0044237;GO:0044238;GO:0044249;GO:0044260;GO:0050789;GO:0050794;GO:0051171;GO:0051252;GO:0060255;GO:0065007;GO:0080090;GO:…		GO:0005634;GO:0043226;GO:0043227;GO:0043229;GO:0043231;GO:0044424;GO:0044464	GO:0006139;GO:0006396;GO:0006397;GO:0006807;GO:0008152;GO:0009058;GO:0009987;GO:0016070;GO:0016071;GO:0034641;GO:0043170;GO:0044237;GO:0044238;GO:0065007	GO:0005634;GO:0043226;GO:0043229;GO:0043231;GO:0044464	CADANIAG00008341	CADANIAP00008341	CADANIAT00008341			spt5	IPR005824;IPR024945;IPR022581;IPR017071;IPR005100;IPR008991	KOW;Spt5_C_dom;Spt5_N;TF_Spt5;TF_Spt5_NGN-domain;Translation_prot_SH3-like					PF03439;PF11942					Transcription elongation factor spt5			SM01104;SM00739	CTD;KOW	Emericella nidulans (strain FGSC A4 / ATCC 38163 / CBS 112.46 / NRRL 194 / M139)	SPT5_EMENI			COG0250
Q00791;C8VDS8;Q00726;Q5AV74		cellular aromatic compound metabolic process;metabolic process;biosynthetic process;toxin biosynthetic process;toxin metabolic process;cellular process;heterocycle biosynthetic process;secondary metabolic process;cellular metabolic process;cellular biosynthetic process;sterigmatocystin metabolic process;sterigmatocystin biosynthetic process;heterocycle metabolic process	catalytic activity;oxidoreductase activity;oxidoreductase activity, acting on CH-OH group of donors;versicolorin reductase activity		cellular aromatic compound metabolic process;metabolic process;biosynthetic process;toxin metabolic process;cellular process;secondary metabolic process;cellular metabolic process;heterocycle metabolic process		Fatty acid biosynthesis;Biosynthesis of unsaturated fatty acids	adh_short		Completeproteome;NADP;Oxidoreductase;Referenceproteome		GO:0006725;GO:0008152;GO:0009058;GO:0009403;GO:0009404;GO:0009987;GO:0018130;GO:0019748;GO:0044237;GO:0044249;GO:0045460;GO:0045461;GO:0046483	GO:0003824;GO:0016491;GO:0016614;GO:0042469		GO:0006725;GO:0008152;GO:0009058;GO:0009404;GO:0009987;GO:0019748;GO:0044237;GO:0046483		CADANIAG00000947	CADANIAP00000947	CADANIAT00000947			stcU	IPR002198;IPR002347;IPR016040;IPR020904	DH_sc/Rdtase_SDR;Glc/ribitol_DH;NAD(P)-bd_dom;Sc_DH/Rdtase_CS	ko00061;ko01040				PF00106	PR00081;PR00080	GDHRDH;SDRFAMILY	PS00061	ADH_SHORT	Versicolorin reductase					Emericella nidulans (strain FGSC A4 / ATCC 38163 / CBS 112.46 / NRRL 194 / M139)	STCU_EMENI		1.1.-.-	COG1028
Q5BBK9;C8VLP8		developmental process involved in reproduction;protein targeting;protein targeting to vacuole;transport;intracellular protein transport;endocytosis;vacuolar transport;cellular process;membrane invagination;cellular component assembly involved in morphogenesis;protein transport;cellular component organization;cellular membrane organization;vesicle-mediated transport;endosome transport;reproductive…	binding;phospholipid binding;lipid binding;phosphatidylinositol-3-phosphate binding;phosphatidylinositol binding;ion binding;cation binding;metal ion binding	prospore membrane;nucleus;cytosol;endosome membrane;membrane;organelle membrane;macromolecular complex;ESCRT-0 complex;organelle;membrane-bounded organelle;intracellular organelle;intracellular membrane-bounded organelle;protein complex;organelle part;intracellular part;endosomal part;cytoplasmic part;intracellular organelle part;cell part	protein targeting;transport;endocytosis;vacuolar transport;cellular process;membrane invagination;protein transport;cellular component organization;cellular membrane organization;vesicle-mediated transport;endosome transport;cellular component assembly;developmental process;anatomical structure formation involved in morphogenesis;establishment of localization;membrane organization;biological regu…	nucleus;cytosol;membrane;macromolecular complex;organelle;intracellular organelle;intracellular membrane-bounded organelle;protein complex;cell part	Endocytosis;Phagosome	FYVE;VHS		Completeproteome;Endosome;Membrane;Metal-binding;Referenceproteome;Repeat;Zinc;Zinc-finger		GO:0003006;GO:0006605;GO:0006623;GO:0006810;GO:0006886;GO:0006897;GO:0007034;GO:0009987;GO:0010324;GO:0010927;GO:0015031;GO:0016043;GO:0016044;GO:0016192;GO:0016197;GO:0022414;GO:0022607;GO:0031321;GO:0032502;GO:0032507;GO:0032509;GO:0032511;GO:0043328;GO:0045053;GO:0045184;GO:0045185;GO:0045324;GO:0046907;GO:0048610;GO:0048646;GO:0051234;GO:0051235;GO:0051649;GO:0051651;GO:0061024;GO:0065007;GO:…	GO:0005488;GO:0005543;GO:0008289;GO:0032266;GO:0035091;GO:0043167;GO:0043169;GO:0046872	GO:0005628;GO:0005634;GO:0005829;GO:0010008;GO:0016020;GO:0031090;GO:0032991;GO:0033565;GO:0043226;GO:0043227;GO:0043229;GO:0043231;GO:0043234;GO:0044422;GO:0044424;GO:0044440;GO:0044444;GO:0044446;GO:0044464	GO:0006605;GO:0006810;GO:0006897;GO:0007034;GO:0009987;GO:0010324;GO:0015031;GO:0016043;GO:0016044;GO:0016192;GO:0016197;GO:0022607;GO:0032502;GO:0048646;GO:0051234;GO:0061024;GO:0065007	GO:0005634;GO:0005829;GO:0016020;GO:0032991;GO:0043226;GO:0043229;GO:0043231;GO:0043234;GO:0044464	CADANIAG00008741	CADANIAP00008741	CADANIAT00008741			vps27	IPR008942;IPR017073;IPR003903;IPR002014;IPR018205;IPR000306;IPR017455;IPR011011;IPR013083	ENTH_VHS;Ubi-bd_Hrs_VPS27;Ubiquitin-int_motif;VHS;VHS_subgr;Znf_FYVE;Znf_FYVE-rel;Znf_FYVE_PHD;Znf_RING/FYVE/PHD	ko04144;ko04145				PF01363;PF00790			PS50330;PS50179;PS50178	UIM;VHS;ZF_FYVE	Vacuolar protein sorting-associated protein 27			SM00064;SM00726;SM00288	FYVE;UIM;VHS	Emericella nidulans (strain FGSC A4 / ATCC 38163 / CBS 112.46 / NRRL 194 / M139)	VPS27_EMENI			NOG257212
Q5BD38;C8VMX9		polysaccharide catabolic process;carbohydrate metabolic process;polysaccharide metabolic process;cellular glucan metabolic process;metabolic process;catabolic process;macromolecule catabolic process;cellular process;cellular cell wall macromolecule metabolic process;cell wall polysaccharide metabolic process;hemicellulose metabolic process;xyloglucan metabolic process;carbohydrate catabolic proce…	catalytic activity;hydrolase activity, hydrolyzing O-glycosyl compounds;hydrolase activity;hydrolase activity, acting on glycosyl bonds;oligoxyloglucan reducing-end-specific cellobiohydrolase activity	extracellular region	carbohydrate metabolic process;polysaccharide metabolic process;metabolic process;catabolic process;cellular process;macromolecule metabolic process;cellular metabolic process;primary metabolic process;cellular cell wall organization or biogenesis;cell wall organization or biogenesis;cell wall organization	extracellular region		BNR		Carbohydratemetabolism;Cellwallbiogenesis/degradation;Completeproteome;Glycoprotein;Glycosidase;Hydrolase;Polysaccharidedegradation;Referenceproteome;Repeat;Secreted;Signal		GO:0000272;GO:0005975;GO:0005976;GO:0006073;GO:0008152;GO:0009056;GO:0009057;GO:0009987;GO:0010382;GO:0010383;GO:0010410;GO:0010411;GO:0016052;GO:0043170;GO:0044036;GO:0044042;GO:0044237;GO:0044238;GO:0044260;GO:0044262;GO:0044264;GO:0070882;GO:0071554;GO:0071555;GO:0071704;GO:0071840;GO:0071841	GO:0003824;GO:0004553;GO:0016787;GO:0016798;GO:0033945	GO:0005576	GO:0005975;GO:0005976;GO:0008152;GO:0009056;GO:0009987;GO:0043170;GO:0044237;GO:0044238;GO:0070882;GO:0071554;GO:0071555	GO:0005576	CADANIAG00008169	CADANIAP00008169	CADANIAT00008169			xgcA	IPR002860	BNR_rpt					PF02012					Oligoxyloglucan-reducing end-specific xyloglucanase					Emericella nidulans (strain FGSC A4 / ATCC 38163 / CBS 112.46 / NRRL 194 / M139)	XGCA_EMENI		3.2.1.150	NOG12793
Q5ARP5;C8VKR4;Q1HFQ4		polysaccharide catabolic process;carbohydrate metabolic process;polysaccharide metabolic process;metabolic process;catabolic process;macromolecule catabolic process;carbohydrate catabolic process;macromolecule metabolic process;primary metabolic process	catalytic activity;hydrolase activity, hydrolyzing O-glycosyl compounds;alpha-galactosidase activity;galactosidase activity;hydrolase activity;hydrolase activity, acting on glycosyl bonds;raffinose alpha-galactosidase activity	extracellular region	carbohydrate metabolic process;polysaccharide metabolic process;metabolic process;catabolic process;macromolecule metabolic process;primary metabolic process	extracellular region		Melibiase		Carbohydratemetabolism;Completeproteome;Glycoprotein;Glycosidase;Hydrolase;Magnesium;NAD;Polysaccharidedegradation;Referenceproteome;Secreted		GO:0000272;GO:0005975;GO:0005976;GO:0008152;GO:0009056;GO:0009057;GO:0016052;GO:0043170;GO:0044238	GO:0003824;GO:0004553;GO:0004557;GO:0015925;GO:0016787;GO:0016798;GO:0052692	GO:0005576	GO:0005975;GO:0005976;GO:0008152;GO:0009056;GO:0043170;GO:0044238	GO:0005576	CADANIAG00007818	CADANIAP00007818	CADANIAT00007818			aglG	IPR013785;IPR002252;IPR000111;IPR017853	Aldolase_TIM;Glyco_hydro_36;Glyco_hydro_GHD;Glycoside_hydrolase_SF					PF02065	PR00743	GLHYDRLASE36			Probable alpha-galactosidase G					Emericella nidulans (strain FGSC A4 / ATCC 38163 / CBS 112.46 / NRRL 194 / M139)	AGALG_EMENI		3.2.1.22	COG3345
Q460G9;C8VL21;Q5ARU9		alcohol metabolic process;ethanol metabolic process;ethanol catabolic process;organic acid metabolic process;acetate metabolic process;metabolic process;catabolic process;biosynthetic process;cellular process;organic acid biosynthetic process;acetate biosynthetic process;carboxylic acid metabolic process;monocarboxylic acid metabolic process;primary alcohol metabolic process;primary alcohol catab…		plasma membrane;membrane;integral to membrane;cell septum;intrinsic to membrane;membrane part;cell part	alcohol metabolic process;organic acid metabolic process;metabolic process;catabolic process;biosynthetic process;cellular process;cellular ketone metabolic process;cellular metabolic process;small molecule metabolic process	plasma membrane;membrane;cell septum;cell part		Grp1_Fun34_YaaH		Cellmembrane;Completeproteome;Membrane;Referenceproteome;Transmembrane;Transmembranehelix		GO:0006066;GO:0006067;GO:0006068;GO:0006082;GO:0006083;GO:0008152;GO:0009056;GO:0009058;GO:0009987;GO:0016053;GO:0019413;GO:0019752;GO:0032787;GO:0034308;GO:0034310;GO:0042180;GO:0043436;GO:0044237;GO:0044249;GO:0044281;GO:0044282;GO:0044283;GO:0046164;GO:0046394		GO:0005886;GO:0016020;GO:0016021;GO:0030428;GO:0031224;GO:0044425;GO:0044464	GO:0006066;GO:0006082;GO:0008152;GO:0009056;GO:0009058;GO:0009987;GO:0042180;GO:0044237;GO:0044281	GO:0005886;GO:0016020;GO:0030428;GO:0044464	CADANIAG00007874	CADANIAP00007874	CADANIAT00007874			alcS	IPR030186;IPR000791	AlcS;Grp1_Fun34_YaaH					PF01184					Protein alcS					Emericella nidulans (strain FGSC A4 / ATCC 38163 / CBS 112.46 / NRRL 194 / M139)	ALCS_EMENI			NOG129019
Q5B3I9;C8V9S6		nucleobase-containing compound metabolic process;chromatin organization;chromatin assembly or disassembly;nucleosome assembly;DNA replication-dependent nucleosome assembly;DNA replication-independent nucleosome assembly;nucleosome disassembly;chromatin remodeling;chromatin silencing;chromatin silencing at telomere;transcription, DNA-dependent;regulation of transcription, DNA-dependent;regulation …		nucleus;cytosol;organelle;membrane-bounded organelle;intracellular organelle;intracellular membrane-bounded organelle;intracellular part;cytoplasmic part;cell part	nucleobase-containing compound metabolic process;chromatin organization;protein modification process;nitrogen compound metabolic process;response to stress;organelle organization;metabolic process;biosynthetic process;cellular process;cellular component organization;RNA metabolic process;gene silencing;chromatin modification;histone modification;peptidyl-amino acid modification;protein metabolic …	nucleus;cytosol;organelle;intracellular organelle;intracellular membrane-bounded organelle;cell part		ASF1_hist_chap		Chaperone;Chromatinregulator;Coiledcoil;Completeproteome;Nucleus;Referenceproteome;Transcription;Transcriptionregulation		GO:0006139;GO:0006325;GO:0006333;GO:0006334;GO:0006335;GO:0006336;GO:0006337;GO:0006338;GO:0006342;GO:0006348;GO:0006351;GO:0006355;GO:0006357;GO:0006464;GO:0006473;GO:0006475;GO:0006807;GO:0006950;GO:0006996;GO:0008152;GO:0009058;GO:0009059;GO:0009889;GO:0009890;GO:0009891;GO:0009892;GO:0009893;GO:0009987;GO:0010468;GO:0010556;GO:0010558;GO:0010604;GO:0010605;GO:0010629;GO:0010638;GO:0016043;GO:…		GO:0005634;GO:0005829;GO:0043226;GO:0043227;GO:0043229;GO:0043231;GO:0044424;GO:0044444;GO:0044464	GO:0006139;GO:0006325;GO:0006464;GO:0006807;GO:0006950;GO:0006996;GO:0008152;GO:0009058;GO:0009987;GO:0016043;GO:0016070;GO:0016458;GO:0016568;GO:0016570;GO:0018193;GO:0019538;GO:0022411;GO:0022607;GO:0031399;GO:0033043;GO:0034622;GO:0034641;GO:0040029;GO:0043170;GO:0043412;GO:0043543;GO:0044237;GO:0044238;GO:0050896;GO:0051276;GO:0065003;GO:0065007;GO:0070647	GO:0005634;GO:0005829;GO:0043226;GO:0043229;GO:0043231;GO:0044464	CADANIAG00005511	CADANIAP00005511	CADANIAT00005511			asf1	IPR017282;IPR006818	Hist_deposition_Asf1;Histone_chaperone_ASF1-like					PF04729					Histone chaperone asf1					Emericella nidulans (strain FGSC A4 / ATCC 38163 / CBS 112.46 / NRRL 194 / M139)	ASF1_EMENI			COG5137
Q5AYN6;C8V129		formation of translation initiation complex;regulation of translation;cell cycle;regulation of mitotic cell cycle;regulation of biosynthetic process;cellular process;regulation of gene expression;regulation of macromolecule biosynthetic process;posttranscriptional regulation of gene expression;cellular component organization;regulation of metabolic process;cellular component assembly;ribonucleopr…		nucleus;cytosol;organelle;membrane-bounded organelle;intracellular organelle;intracellular membrane-bounded organelle;intracellular part;cytoplasmic part;cell part	regulation of translation;cell cycle;regulation of mitotic cell cycle;cellular process;cellular component organization;cellular component assembly;ribonucleoprotein complex assembly;cellular macromolecular complex assembly;cell division;regulation of cell cycle;macromolecular complex assembly;biological regulation	nucleus;cytosol;organelle;intracellular organelle;intracellular membrane-bounded organelle;cell part			BENPORATH_NANOG_TARGETS;BENPORATH_OCT4_TARGETS;BENPORATH_PROLIFERATION;CASORELLI_ACUTE_PROMYELOCYTIC_LEUKEMIA_DN;CELL_CYCLE_ARREST_GO_0007050;CELL_CYCLE_GO_0007049;CELL_PROLIFERATION_GO_0008283;chr10p13;CYTOPLASM;DIAZ_CHRONIC_MEYLOGENOUS_LEUKEMIA_UP;ENK_UV_RESPONSE_KERATINOCYTE_DN;FIGUEROA_AML_METHYLATION_CLUSTER_1_DN;GCM_APEX1;GRADE_COLON_CANCER_UP;GSE14308_TH1_VS_NATURAL_TREG_UP;GSE14308_TH17_V…	Cellcycle;Celldivision;Completeproteome;Cytoplasm;Referenceproteome		GO:0001732;GO:0006417;GO:0007049;GO:0007346;GO:0009889;GO:0009987;GO:0010468;GO:0010556;GO:0010608;GO:0016043;GO:0019222;GO:0022607;GO:0022618;GO:0031323;GO:0031326;GO:0032268;GO:0034621;GO:0034622;GO:0043933;GO:0050789;GO:0050794;GO:0051246;GO:0051301;GO:0051726;GO:0060255;GO:0065003;GO:0065007;GO:0071826;GO:0071840;GO:0071841;GO:0071842;GO:0071844;GO:0080090;GO:2000112		GO:0005634;GO:0005829;GO:0043226;GO:0043227;GO:0043229;GO:0043231;GO:0044424;GO:0044444;GO:0044464	GO:0006417;GO:0007049;GO:0007346;GO:0009987;GO:0016043;GO:0022607;GO:0022618;GO:0034622;GO:0051301;GO:0051726;GO:0065003;GO:0065007	GO:0005634;GO:0005829;GO:0043226;GO:0043229;GO:0043231;GO:0044464	CADANIAG00007372	CADANIAP00007372	CADANIAT00007372			cdc123	IPR009772	CDC123										Cell division cycle protein 123					Emericella nidulans (strain FGSC A4 / ATCC 38163 / CBS 112.46 / NRRL 194 / M139)	CD123_EMENI			NOG236547
Q00770;C8VKJ7;O42828;Q5BC34		organic acid metabolic process;cellular amino acid metabolic process;L-phenylalanine metabolic process;L-phenylalanine catabolic process;tyrosine metabolic process;tyrosine catabolic process;cellular aromatic compound metabolic process;nitrogen compound metabolic process;metabolic process;catabolic process;cellular amino acid catabolic process;aromatic amino acid family metabolic process;aromatic…	catalytic activity;fumarylacetoacetase activity;binding;hydrolase activity;hydrolase activity, acting on acid carbon-carbon bonds;hydrolase activity, acting on acid carbon-carbon bonds, in ketonic substances;ion binding;cation binding;metal ion binding	intracellular;cell part	organic acid metabolic process;cellular amino acid metabolic process;cellular aromatic compound metabolic process;nitrogen compound metabolic process;metabolic process;catabolic process;amine metabolic process;cellular process;cellular nitrogen compound metabolic process;cellular ketone metabolic process;cellular metabolic process;primary metabolic process;small molecule metabolic process	intracellular;cell part	Tyrosine metabolism;Styrene degradation	FAA_hydrolase;FAA_hydrolase_N		Calcium;Completeproteome;Hydrolase;Magnesium;Metal-binding;Phenylalaninecatabolism;Referenceproteome;Tyrosinecatabolism		GO:0006082;GO:0006520;GO:0006558;GO:0006559;GO:0006570;GO:0006572;GO:0006725;GO:0006807;GO:0008152;GO:0009056;GO:0009063;GO:0009072;GO:0009074;GO:0009308;GO:0009310;GO:0009987;GO:0016054;GO:0019439;GO:0019752;GO:0034641;GO:0042180;GO:0043436;GO:0044106;GO:0044237;GO:0044238;GO:0044248;GO:0044281;GO:0044282;GO:0046395	GO:0003824;GO:0004334;GO:0005488;GO:0016787;GO:0016822;GO:0016823;GO:0043167;GO:0043169;GO:0046872	GO:0005622;GO:0044464	GO:0006082;GO:0006520;GO:0006725;GO:0006807;GO:0008152;GO:0009056;GO:0009308;GO:0009987;GO:0034641;GO:0042180;GO:0044237;GO:0044238;GO:0044281	GO:0005622;GO:0044464	CADANIAG00008552	CADANIAP00008552	CADANIAT00008552			fahA	IPR005959;IPR002529;IPR011234;IPR015377	Fumarylacetoacetase;Fumarylacetoacetase_C;Fumarylacetoacetase_C-rel;Fumarylacetoacetase_N	ko00350;ko00643				PF01557;PF09298					Fumarylacetoacetase					Emericella nidulans (strain FGSC A4 / ATCC 38163 / CBS 112.46 / NRRL 194 / M139)	FAAA_EMENI		3.7.1.2	COG0179
C8V329;B1PXD0;Q5B0B3		transport;purine base transport;cellular process;nucleobase transport;nucleobase-containing compound transport;establishment of localization;transmembrane transport;nitrogen compound transport;purine-containing compound transmembrane transport	transporter activity;nucleobase transmembrane transporter activity;nucleobase-containing compound transmembrane transporter activity;transmembrane transporter activity;substrate-specific transmembrane transporter activity;substrate-specific transporter activity	plasma membrane;membrane;integral to membrane;intrinsic to membrane;membrane part;cell part	transport;cellular process;nucleobase-containing compound transport;establishment of localization;transmembrane transport	plasma membrane;membrane;cell part		Transp_cyt_pur		Cellmembrane;Completeproteome;Membrane;Phosphoprotein;Referenceproteome;Transmembrane;Transmembranehelix;Transport		GO:0006810;GO:0006863;GO:0009987;GO:0015851;GO:0015931;GO:0051234;GO:0055085;GO:0071705;GO:0072530	GO:0005215;GO:0015205;GO:0015932;GO:0022857;GO:0022891;GO:0022892	GO:0005886;GO:0016020;GO:0016021;GO:0031224;GO:0044425;GO:0044464	GO:0006810;GO:0009987;GO:0015931;GO:0051234;GO:0055085	GO:0005886;GO:0016020;GO:0044464	CADANIAG00007001	CADANIAP00007001	CADANIAT00007001			fcyB	IPR001248;IPR026030	Cyt_pur_permease;Pur-cyt_permease					PF02133					Purine-cytosine permease fcyB					Emericella nidulans (strain FGSC A4 / ATCC 38163 / CBS 112.46 / NRRL 194 / M139)	FCY2_EMENI			COG1457
Q5BCH7;C8VP55				mitochondrial outer membrane;endoplasmic reticulum;membrane;outer membrane;organelle membrane;mitochondrial membrane;organelle outer membrane;organelle;membrane-bounded organelle;intracellular organelle;intracellular membrane-bounded organelle;organelle part;intracellular part;mitochondrial part;cytoplasmic part;intracellular organelle part;cell part		endoplasmic reticulum;membrane;organelle;intracellular organelle;intracellular membrane-bounded organelle;cell part				Completeproteome;Membrane;Mitochondrion;Mitochondrionoutermembrane;Referenceproteome;Transitpeptide				GO:0005741;GO:0005783;GO:0016020;GO:0019867;GO:0031090;GO:0031966;GO:0031968;GO:0043226;GO:0043227;GO:0043229;GO:0043231;GO:0044422;GO:0044424;GO:0044429;GO:0044444;GO:0044446;GO:0044464		GO:0005783;GO:0016020;GO:0043226;GO:0043229;GO:0043231;GO:0044464	CADANIAG00008399	CADANIAP00008399	CADANIAT00008399			fmp52	IPR016040	NAD(P)-bd_dom										Protein fmp52, mitochondrial					Emericella nidulans (strain FGSC A4 / ATCC 38163 / CBS 112.46 / NRRL 194 / M139)	FMP52_EMENI			COG0702
P0CS88;C8VEG1;Q5ATD0		nucleobase-containing compound metabolic process;transcription, DNA-dependent;regulation of transcription, DNA-dependent;nitrogen compound metabolic process;metabolic process;biosynthetic process;macromolecule biosynthetic process;regulation of biosynthetic process;cellular process;regulation of gene expression;regulation of macromolecule biosynthetic process;RNA metabolic process;regulation of n…	nucleotide binding;catalytic activity;binding;hydrolase activity;ion binding;cation binding;metal ion binding;cofactor binding;coenzyme binding;NAD binding;NAD+ binding	nucleus;organelle;membrane-bounded organelle;intracellular organelle;intracellular membrane-bounded organelle;intracellular part;cell part	nucleobase-containing compound metabolic process;nitrogen compound metabolic process;metabolic process;biosynthetic process;cellular process;RNA metabolic process;cellular nitrogen compound metabolic process;macromolecule metabolic process;cellular metabolic process;primary metabolic process;biological regulation	nucleus;organelle;intracellular organelle;intracellular membrane-bounded organelle;cell part		SIR2		Completeproteome;Hydrolase;Metal-binding;NAD;Nucleus;Referenceproteome;Repressor;Transcription;Transcriptionregulation;Zinc		GO:0006139;GO:0006351;GO:0006355;GO:0006807;GO:0008152;GO:0009058;GO:0009059;GO:0009889;GO:0009987;GO:0010468;GO:0010556;GO:0016070;GO:0019219;GO:0019222;GO:0031323;GO:0031326;GO:0032774;GO:0034641;GO:0034645;GO:0043170;GO:0044237;GO:0044238;GO:0044249;GO:0044260;GO:0050789;GO:0050794;GO:0051171;GO:0051252;GO:0060255;GO:0065007;GO:0080090;GO:0090304;GO:2000112	GO:0000166;GO:0003824;GO:0005488;GO:0016787;GO:0043167;GO:0043169;GO:0046872;GO:0048037;GO:0050662;GO:0051287;GO:0070403	GO:0005634;GO:0043226;GO:0043227;GO:0043229;GO:0043231;GO:0044424;GO:0044464	GO:0006139;GO:0006807;GO:0008152;GO:0009058;GO:0009987;GO:0016070;GO:0034641;GO:0043170;GO:0044237;GO:0044238;GO:0065007	GO:0005634;GO:0043226;GO:0043229;GO:0043231;GO:0044464	CADANIAG00002934	CADANIAP00002934	CADANIAT00002934			AN11873	IPR029035;IPR003000;IPR026591;IPR026590	DHS-like_NAD/FAD-binding_dom;Sirtuin;Sirtuin_cat_small_dom;Ssirtuin_cat_dom					PF02146			PS50305	SIRTUIN	NAD-dependent protein deacetylase hst2-2					Emericella nidulans (strain FGSC A4 / ATCC 38163 / CBS 112.46 / NRRL 194 / M139)	HST22_EMENI		3.5.1.-	COG0846
Q5B464;C8VB13		autophagic vacuole assembly;mitochondrion degradation;protein modification process;protein lipidation;transport;autophagy;response to stress;cellular response to nitrogen starvation;organelle organization;vacuole organization;cell communication;protein localization;metabolic process;catabolic process;cellular response to starvation;response to external stimulus;cellular process;response to extrac…	binding;phospholipid binding;lipid binding;phosphatidylinositol-3-phosphate binding;phosphatidylinositol binding;phosphatidylinositol-3,5-bisphosphate binding	storage vacuole;lytic vacuole;fungal-type vacuole;endosome;vacuole;vacuolar membrane;Golgi apparatus;cytosol;vesicle membrane;membrane;extrinsic to membrane;cytoplasmic vesicle membrane;organelle membrane;pre-autophagosomal structure membrane;organelle;membrane-bounded organelle;intracellular organelle;intracellular membrane-bounded organelle;organelle part;intracellular part;membrane part;cytopl…	protein modification process;protein lipidation;transport;autophagy;response to stress;organelle organization;vacuole organization;cell communication;metabolic process;catabolic process;response to external stimulus;cellular process;response to extracellular stimulus;membrane invagination;protein transport;cellular component organization;cellular membrane organization;protein metabolic process;ce…	endosome;vacuole;Golgi apparatus;cytosol;membrane;organelle;intracellular organelle;intracellular membrane-bounded organelle;cell part		WD40		Completeproteome;Cytoplasmicvesicle;Membrane;Proteintransport;Referenceproteome;Repeat;Transport;Vacuole;WDrepeat		GO:0000045;GO:0000422;GO:0006464;GO:0006497;GO:0006810;GO:0006914;GO:0006950;GO:0006995;GO:0006996;GO:0007033;GO:0007154;GO:0008104;GO:0008152;GO:0009056;GO:0009267;GO:0009605;GO:0009987;GO:0009991;GO:0010324;GO:0015031;GO:0016043;GO:0016044;GO:0016237;GO:0019538;GO:0022607;GO:0031667;GO:0031668;GO:0031669;GO:0033036;GO:0033554;GO:0034497;GO:0034613;GO:0034727;GO:0042594;GO:0043170;GO:0043412;GO:…	GO:0005488;GO:0005543;GO:0008289;GO:0032266;GO:0035091;GO:0080025	GO:0000322;GO:0000323;GO:0000324;GO:0005768;GO:0005773;GO:0005774;GO:0005794;GO:0005829;GO:0012506;GO:0016020;GO:0019898;GO:0030659;GO:0031090;GO:0034045;GO:0043226;GO:0043227;GO:0043229;GO:0043231;GO:0044422;GO:0044424;GO:0044425;GO:0044433;GO:0044437;GO:0044444;GO:0044446;GO:0044464	GO:0006464;GO:0006497;GO:0006810;GO:0006914;GO:0006950;GO:0006996;GO:0007033;GO:0007154;GO:0008152;GO:0009056;GO:0009605;GO:0009987;GO:0009991;GO:0010324;GO:0015031;GO:0016043;GO:0016044;GO:0019538;GO:0022607;GO:0042594;GO:0043170;GO:0043412;GO:0044237;GO:0044238;GO:0050896;GO:0051179;GO:0051234;GO:0051641;GO:0061024;GO:0070925	GO:0005768;GO:0005773;GO:0005794;GO:0005829;GO:0016020;GO:0043226;GO:0043229;GO:0043231;GO:0044464	CADANIAG00005767	CADANIAP00005767	CADANIAT00005767			hsv2	IPR015943;IPR001680;IPR017986	WD40/YVTN_repeat-like_dom;WD40_repeat;WD40_repeat_dom					PF00400					SVP1-like protein 2			SM00320	WD40	Emericella nidulans (strain FGSC A4 / ATCC 38163 / CBS 112.46 / NRRL 194 / M139)	HSV2_EMENI			NOG317564
O60032;C8VIM7;Q5B8N5		reproduction;regulation of protein phosphorylation;regulation of transcription, DNA-dependent;organelle organization;cytoskeleton organization;actin filament organization;budding cell bud growth;budding cell apical bud growth;protein localization;regulation of cell shape;regulation of biosynthetic process;cellular process;regulation of gene expression;regulation of macromolecule biosynthetic proc…		incipient cellular bud site;nucleus;cytoplasm;microtubule organizing center;spindle pole body;actomyosin contractile ring;cytosol;cellular bud;site of polarized growth;medial cortex;cell division site part;non-growing cell tip;organelle;membrane-bounded organelle;intracellular organelle;intracellular membrane-bounded organelle;mating projection tip;organelle part;intracellular part;cytoskeletal p…	reproduction;organelle organization;cytoskeleton organization;cellular process;cellular component organization;filamentous growth;hyphal growth;regulation of protein modification process;developmental process;growth;sporulation;anatomical structure formation involved in morphogenesis;localization;cellular localization;biological regulation	nucleus;cytoplasm;microtubule organizing center;cytosol;cellular bud;site of polarized growth;organelle;intracellular organelle;intracellular membrane-bounded organelle;cell part	mTOR signaling pathway	Mo25		Completeproteome;Cytoplasm;Referenceproteome		GO:0000003;GO:0001932;GO:0006355;GO:0006996;GO:0007010;GO:0007015;GO:0007117;GO:0007118;GO:0008104;GO:0008360;GO:0009889;GO:0009987;GO:0010468;GO:0010556;GO:0010590;GO:0016043;GO:0019219;GO:0019220;GO:0019222;GO:0019954;GO:0022402;GO:0022603;GO:0022604;GO:0030029;GO:0030036;GO:0030037;GO:0030436;GO:0030447;GO:0030448;GO:0031323;GO:0031326;GO:0031399;GO:0031532;GO:0032268;GO:0032465;GO:0032502;GO:…		GO:0000131;GO:0005634;GO:0005737;GO:0005815;GO:0005816;GO:0005826;GO:0005829;GO:0005933;GO:0030427;GO:0031097;GO:0032155;GO:0035839;GO:0043226;GO:0043227;GO:0043229;GO:0043231;GO:0043332;GO:0044422;GO:0044424;GO:0044430;GO:0044444;GO:0044446;GO:0044448;GO:0044463;GO:0044464;GO:0051286;GO:0060187;GO:0070938;GO:0071958	GO:0000003;GO:0006996;GO:0007010;GO:0009987;GO:0016043;GO:0030447;GO:0030448;GO:0031399;GO:0032502;GO:0040007;GO:0043934;GO:0048646;GO:0051179;GO:0051641;GO:0065007	GO:0005634;GO:0005737;GO:0005815;GO:0005829;GO:0005933;GO:0030427;GO:0043226;GO:0043229;GO:0043231;GO:0044464	CADANIAG00009983	CADANIAP00009983	CADANIAT00009983			hymA	IPR011989;IPR016024;IPR028637;IPR013878	ARM-like;ARM-type_fold;HymA;Mo25	ko04150				PF08569					Conidiophore development protein hymA					Emericella nidulans (strain FGSC A4 / ATCC 38163 / CBS 112.46 / NRRL 194 / M139)	HYMA_EMENI			NOG307443
Q5B4X6;C8V8T8		protein modification process;metabolic process;cellular process;protein metabolic process;macromolecule metabolic process;macromolecule modification;cellular metabolic process;primary metabolic process;cellular macromolecule metabolic process;cellular protein metabolic process;protein initiator methionine removal	catalytic activity;aminopeptidase activity;binding;peptidase activity;metalloexopeptidase activity;metallopeptidase activity;exopeptidase activity;hydrolase activity;ion binding;cation binding;metal ion binding;metalloaminopeptidase activity;peptidase activity, acting on L-amino acid peptides	cytoplasm;intracellular part;cell part	protein modification process;metabolic process;cellular process;protein metabolic process;macromolecule metabolic process;macromolecule modification;cellular metabolic process;primary metabolic process	cytoplasm;cell part		Peptidase_M24		Aminopeptidase;Completeproteome;Cytoplasm;Hydrolase;Metal-binding;Protease;Referenceproteome		GO:0006464;GO:0008152;GO:0009987;GO:0019538;GO:0043170;GO:0043412;GO:0044237;GO:0044238;GO:0044260;GO:0044267;GO:0070084	GO:0003824;GO:0004177;GO:0005488;GO:0008233;GO:0008235;GO:0008237;GO:0008238;GO:0016787;GO:0043167;GO:0043169;GO:0046872;GO:0070006;GO:0070011	GO:0005737;GO:0044424;GO:0044464	GO:0006464;GO:0008152;GO:0009987;GO:0019538;GO:0043170;GO:0043412;GO:0044237;GO:0044238	GO:0005737;GO:0044464	CADANIAG00006053	CADANIAP00006053	CADANIAT00006053			AN4404	IPR001714;IPR000994;IPR002468;IPR018349;IPR011991	Pept_M24_MAP;Pept_M24_structural-domain;Pept_M24A_MAP2;Pept_M24A_MAP2_BS;WHTH_DNA-bd_dom					PF00557	PR00599	MAPEPTIDASE	PS01202	MAP_2	Methionine aminopeptidase 2-1					Emericella nidulans (strain FGSC A4 / ATCC 38163 / CBS 112.46 / NRRL 194 / M139)	MAP21_EMENI		3.4.11.18	COG0024
Q5BCL0;C8VP19			protein binding transcription factor activity;transcription factor binding transcription factor activity;RNA polymerase II transcription factor binding transcription factor activity;RNA polymerase II transcription cofactor activity;transcription cofactor activity	mediator complex;macromolecular complex;protein complex;organelle part;intracellular part;nuclear part;intracellular organelle part;nucleoplasm part;cell part		macromolecular complex;protein complex;cell part		Med8	BASAKI_YBX1_TARGETS_UP;BENPORATH_ES_CORE_NINE_CORRELATED;CCAWYNNGAAR_UNKNOWN;chr1p34;CREIGHTON_ENDOCRINE_THERAPY_RESISTANCE_3;CTACCTC,LET-7A,LET-7B,LET-7C,LET-7D,LET-7E,LET-7F,MIR-98,LET-7G,LET-7I;DNA_DIRECTED_RNA_POLYMERASEII_HOLOENZYME;GCANCTGNY_V$MYOD_Q6;GGAANCGGAANY_UNKNOWN;GSE10239_MEMORY_VS_DAY4.5_EFF_CD8_TCELL_UP;GSE10325_MYELOID_VS_LUPUS_MYELOID_DN;GSE13411_NAIVE_VS_MEMORY_BCELL_DN;GSE143…	Activator;Completeproteome;Nucleus;Referenceproteome;Transcription;Transcriptionregulation			GO:0000988;GO:0000989;GO:0001076;GO:0001104;GO:0003712	GO:0016592;GO:0032991;GO:0043234;GO:0044422;GO:0044424;GO:0044428;GO:0044446;GO:0044451;GO:0044464		GO:0032991;GO:0043234;GO:0044464	CADANIAG00008363	CADANIAP00008363	CADANIAT00008363			med8	IPR020178;IPR019364	Mediatior_Med8_fun;Mediatior_Med8_fun/met					PF10232					Mediator of RNA polymerase II transcription subunit 8					Emericella nidulans (strain FGSC A4 / ATCC 38163 / CBS 112.46 / NRRL 194 / M139)	MED8_EMENI			NOG75044
Q5AX36;C8VD81		protein folding;protein complex assembly;metabolic process;cellular process;cellular component organization;cytochrome complex assembly;respiratory chain complex III assembly;protein metabolic process;cellular component assembly;mitochondrial respiratory chain complex assembly;mitochondrial respiratory chain complex III assembly;cellular macromolecular complex subunit organization;cellular macrom…		mitochondrial matrix;membrane-enclosed lumen;organelle lumen;organelle part;intracellular part;mitochondrial part;cytoplasmic part;intracellular organelle part;cell part;intracellular organelle lumen	protein folding;protein complex assembly;metabolic process;cellular process;cellular component organization;protein metabolic process;cellular component assembly;cellular macromolecular complex assembly;macromolecule metabolic process;cellular metabolic process;primary metabolic process;macromolecular complex assembly;protein complex biogenesis	cell part		Complex1_LYR		Chaperone;Completeproteome;Mitochondrion;Referenceproteome;Transitpeptide		GO:0006457;GO:0006461;GO:0008152;GO:0009987;GO:0016043;GO:0017004;GO:0017062;GO:0019538;GO:0022607;GO:0033108;GO:0034551;GO:0034621;GO:0034622;GO:0043170;GO:0043623;GO:0043933;GO:0044085;GO:0044237;GO:0044238;GO:0044260;GO:0044267;GO:0065003;GO:0070271;GO:0071822;GO:0071840;GO:0071841;GO:0071842;GO:0071844;GO:0097033		GO:0005759;GO:0031974;GO:0043233;GO:0044422;GO:0044424;GO:0044429;GO:0044444;GO:0044446;GO:0044464;GO:0070013	GO:0006457;GO:0006461;GO:0008152;GO:0009987;GO:0016043;GO:0019538;GO:0022607;GO:0034622;GO:0043170;GO:0044237;GO:0044238;GO:0065003;GO:0070271	GO:0044464	CADANIAG00000313	CADANIAP00000313	CADANIAT00000313			MZM1	IPR008011	Complex1_LYR					PF05347					Mitochondrial zinc maintenance protein 1, mitochondrial					Emericella nidulans (strain FGSC A4 / ATCC 38163 / CBS 112.46 / NRRL 194 / M139)	MZM1_EMENI			NOG40822
Q5BDL9;C8VRW8				cytoplasm;microtubule organizing center;spindle pole body;organelle part;intracellular part;cytoskeletal part;cytoplasmic part;intracellular organelle part;cell part		cytoplasm;microtubule organizing center;cell part		MOZART1		Completeproteome;Cytoplasm;Cytoskeleton;Referenceproteome				GO:0005737;GO:0005815;GO:0005816;GO:0044422;GO:0044424;GO:0044430;GO:0044444;GO:0044446;GO:0044464		GO:0005737;GO:0005815;GO:0044464	CADANIAG00001250	CADANIAP00001250	CADANIAT00001250			AN1361	IPR022214	DUF3743					PF12554					Mitotic-spindle organizing protein 1					Emericella nidulans (strain FGSC A4 / ATCC 38163 / CBS 112.46 / NRRL 194 / M139)	MZT1_EMENI
Q5ATQ3;C8VE18;Q1HFQ7		polysaccharide catabolic process;carbohydrate metabolic process;polysaccharide metabolic process;metabolic process;catabolic process;macromolecule catabolic process;cellular process;carbohydrate catabolic process;macromolecule metabolic process;cellular metabolic process;primary metabolic process;cellular polysaccharide catabolic process;cellular macromolecule metabolic process;cellular carbohydr…	catalytic activity;hydrolase activity, hydrolyzing O-glycosyl compounds;polygalacturonase activity;hydrolase activity;hydrolase activity, acting on glycosyl bonds	extracellular region	carbohydrate metabolic process;polysaccharide metabolic process;metabolic process;catabolic process;cellular process;macromolecule metabolic process;cellular metabolic process;primary metabolic process;cell wall organization or biogenesis;cell wall organization	extracellular region	Pentose and glucuronate interconversions;Starch and sucrose metabolism	Glyco_hydro_28		Cellwallbiogenesis/degradation;Completeproteome;Disulfidebond;Glycoprotein;Glycosidase;Hydrolase;Referenceproteome;Repeat;Secreted;Signal;Zymogen		GO:0000272;GO:0005975;GO:0005976;GO:0008152;GO:0009056;GO:0009057;GO:0009987;GO:0016052;GO:0043170;GO:0044237;GO:0044238;GO:0044247;GO:0044260;GO:0044262;GO:0044264;GO:0044275;GO:0045488;GO:0045490;GO:0071554;GO:0071555;GO:0071840	GO:0003824;GO:0004553;GO:0004650;GO:0016787;GO:0016798	GO:0005576	GO:0005975;GO:0005976;GO:0008152;GO:0009056;GO:0009987;GO:0043170;GO:0044237;GO:0044238;GO:0071554;GO:0071555	GO:0005576	CADANIAG00002791	CADANIAP00002791	CADANIAT00002791			AN8327	IPR000743;IPR006626;IPR012334;IPR011050	Glyco_hydro_28;PbH1;Pectin_lyas_fold;Pectin_lyase_fold/virulence	ko00040;ko00500				PF00295			PS00502	POLYGALACTURONASE	Endopolygalacturonase AN8327			SM00710	PbH1	Emericella nidulans (strain FGSC A4 / ATCC 38163 / CBS 112.46 / NRRL 194 / M139)	PGLR_EMENI		3.2.1.15	COG5434
Q5B6P3;C8V705		mannoprotein metabolic process;mannoprotein catabolic process;nucleobase-containing compound metabolic process;DNA metabolic process;DNA repair;nucleotide-excision repair;protein modification process;proteolysis;misfolded or incompletely synthesized protein catabolic process;glycoprotein catabolic process;protein deglycosylation;nitrogen compound metabolic process;response to stress;response to D…	peptide-N4-(N-acetyl-beta-glucosaminyl)asparagine amidase activity;nucleic acid binding;DNA binding;damaged DNA binding;catalytic activity;binding;hydrolase activity;hydrolase activity, acting on carbon-nitrogen (but not peptide) bonds;hydrolase activity, acting on carbon-nitrogen (but not peptide) bonds, in linear amides;ion binding;cation binding;metal ion binding	nuclear envelope;cytosol;organelle envelope;envelope;organelle part;intracellular part;nuclear part;cytoplasmic part;intracellular organelle part;cell part	nucleobase-containing compound metabolic process;DNA metabolic process;DNA repair;protein modification process;proteolysis;nitrogen compound metabolic process;response to stress;response to DNA damage stimulus;metabolic process;catabolic process;cellular process;protein metabolic process;cellular nitrogen compound metabolic process;response to chemical stimulus;macromolecule metabolic process;mac…	nuclear envelope;cytosol;cell part	Protein processing in endoplasmic reticulum	Rad4		Completeproteome;Metal-binding;Referenceproteome;Zinc		GO:0006056;GO:0006058;GO:0006139;GO:0006259;GO:0006281;GO:0006289;GO:0006464;GO:0006508;GO:0006515;GO:0006516;GO:0006517;GO:0006807;GO:0006950;GO:0006974;GO:0008152;GO:0009056;GO:0009057;GO:0009100;GO:0009987;GO:0010033;GO:0019538;GO:0033554;GO:0034641;GO:0035966;GO:0035967;GO:0035977;GO:0042221;GO:0043170;GO:0043412;GO:0044237;GO:0044238;GO:0044260;GO:0044267;GO:0050896;GO:0051603;GO:0051716;GO:…	GO:0000224;GO:0003676;GO:0003677;GO:0003684;GO:0003824;GO:0005488;GO:0016787;GO:0016810;GO:0016811;GO:0043167;GO:0043169;GO:0046872	GO:0005635;GO:0005829;GO:0031967;GO:0031975;GO:0044422;GO:0044424;GO:0044428;GO:0044444;GO:0044446;GO:0044464	GO:0006139;GO:0006259;GO:0006281;GO:0006464;GO:0006508;GO:0006807;GO:0006950;GO:0006974;GO:0008152;GO:0009056;GO:0009987;GO:0019538;GO:0034641;GO:0042221;GO:0043170;GO:0043412;GO:0044237;GO:0044238;GO:0050896;GO:0051603	GO:0005635;GO:0005829;GO:0044464	CADANIAG00004927	CADANIAP00004927	CADANIAT00004927			png1	IPR018325	Rad4/PNGase_transGLS-fold	ko04141				PF03835					Protein PNG1					Emericella nidulans (strain FGSC A4 / ATCC 38163 / CBS 112.46 / NRRL 194 / M139)	PNG1_EMENI			NOG307426
Q5B3K6;C8V9U6		nucleobase-containing compound metabolic process;RNA catabolic process;nitrogen compound metabolic process;metabolic process;catabolic process;macromolecule catabolic process;cellular process;RNA metabolic process;cellular nitrogen compound metabolic process;macromolecule metabolic process;cellular metabolic process;primary metabolic process;cellular catabolic process;cellular macromolecule metab…	nucleic acid binding;RNA binding;catalytic activity;nuclease activity;endonuclease activity;endoribonuclease activity;ribonuclease activity;binding;hydrolase activity;hydrolase activity, acting on ester bonds;endoribonuclease activity, producing 3'-phosphomonoesters;endonuclease activity, active with either ribo- or deoxyribonucleic acids and producing 3'-phosphomonoesters;ribonuclease T2 activity	extracellular region;vacuolar lumen;membrane-enclosed lumen;organelle lumen;organelle part;intracellular part;vacuolar part;cytoplasmic part;intracellular organelle part;cell part;intracellular organelle lumen	nucleobase-containing compound metabolic process;RNA catabolic process;nitrogen compound metabolic process;metabolic process;catabolic process;cellular process;RNA metabolic process;cellular nitrogen compound metabolic process;macromolecule metabolic process;cellular metabolic process;primary metabolic process	extracellular region;cell part		Ribonuclease_T2	chr7q36	Completeproteome;Cytoplasm;Disulfidebond;Endonuclease;Glycoprotein;Hydrolase;Nuclease;Referenceproteome;Signal;Vacuole		GO:0006139;GO:0006401;GO:0006807;GO:0008152;GO:0009056;GO:0009057;GO:0009987;GO:0016070;GO:0034641;GO:0043170;GO:0044237;GO:0044238;GO:0044248;GO:0044260;GO:0044265;GO:0090304	GO:0003676;GO:0003723;GO:0003824;GO:0004518;GO:0004519;GO:0004521;GO:0004540;GO:0005488;GO:0016787;GO:0016788;GO:0016892;GO:0016894;GO:0033897	GO:0005576;GO:0005775;GO:0031974;GO:0043233;GO:0044422;GO:0044424;GO:0044437;GO:0044444;GO:0044446;GO:0044464;GO:0070013	GO:0006139;GO:0006401;GO:0006807;GO:0008152;GO:0009056;GO:0009987;GO:0016070;GO:0034641;GO:0043170;GO:0044237;GO:0044238	GO:0005576;GO:0044464	CADANIAG00005531	CADANIAP00005531	CADANIAT00005531			rny1	IPR001568;IPR018188	RNase_T2-like;RNase_T2_AS					PF00445			PS00530;PS00531	RNASE_T2_1;RNASE_T2_2	Ribonuclease T2-like					Emericella nidulans (strain FGSC A4 / ATCC 38163 / CBS 112.46 / NRRL 194 / M139)	RNY1_EMENI		3.1.27.1	NOG285082
Q5B8U0;C8VIT3		nucleobase-containing compound metabolic process;DNA metabolic process;DNA replication;nitrogen compound metabolic process;cell cycle;metabolic process;biosynthetic process;macromolecule biosynthetic process;cellular process;cellular nitrogen compound metabolic process;cellular macromolecule biosynthetic process;macromolecule metabolic process;cellular metabolic process;primary metabolic process;…		nucleus;cytoplasm;organelle;membrane-bounded organelle;intracellular organelle;intracellular membrane-bounded organelle;intracellular part;cell part	nucleobase-containing compound metabolic process;DNA metabolic process;DNA replication;nitrogen compound metabolic process;cell cycle;metabolic process;biosynthetic process;cellular process;cellular nitrogen compound metabolic process;macromolecule metabolic process;cellular metabolic process;primary metabolic process	nucleus;cytoplasm;organelle;intracellular organelle;intracellular membrane-bounded organelle;cell part		Drc1-Sld2		Cellcycle;Completeproteome;Cytoplasm;DNAreplication;Nucleus;Referenceproteome		GO:0006139;GO:0006259;GO:0006260;GO:0006807;GO:0007049;GO:0008152;GO:0009058;GO:0009059;GO:0009987;GO:0034641;GO:0034645;GO:0043170;GO:0044237;GO:0044238;GO:0044249;GO:0044260;GO:0090304		GO:0005634;GO:0005737;GO:0043226;GO:0043227;GO:0043229;GO:0043231;GO:0044424;GO:0044464	GO:0006139;GO:0006259;GO:0006260;GO:0006807;GO:0007049;GO:0008152;GO:0009058;GO:0009987;GO:0034641;GO:0043170;GO:0044237;GO:0044238	GO:0005634;GO:0005737;GO:0043226;GO:0043229;GO:0043231;GO:0044464	CADANIAG00010039	CADANIAP00010039	CADANIAT00010039			sld2	IPR021110	DNA_rep_checkpnt_protein					PF11719					DNA replication regulator sld2					Emericella nidulans (strain FGSC A4 / ATCC 38163 / CBS 112.46 / NRRL 194 / M139)	SLD2_EMENI			NOG288880
Q5BEN5;C8VU72		microtubule cytoskeleton organization;organelle organization;cytoskeleton organization;microtubule-based process;microtubule nucleation;negative regulation of microtubule depolymerization;spindle organization;mitotic spindle organization;cellular process;regulation of cell cycle process;negative regulation of organelle organization;negative regulation of cell cycle process;cellular component orga…	structural molecule activity;structural constituent of cytoskeleton	nuclear envelope;cytosol;microtubule;microtubule associated complex;spindle microtubule;organelle envelope;envelope;macromolecular complex;protein complex;organelle part;intracellular part;nuclear part;cytoskeletal part;cytoplasmic part;intracellular organelle part;cell part;spindle midzone	organelle organization;cytoskeleton organization;cellular process;cellular component organization;cellular component assembly;regulation of organelle organization;cell division;regulation of cell cycle;biological regulation;organelle assembly	nuclear envelope;cytosol;macromolecular complex;protein complex;cell part		CLASP_N		Cellcycle;Celldivision;Completeproteome;Cytoplasm;Cytoskeleton;Microtubule;Mitosis;Nucleus;Referenceproteome;Repeat		GO:0000226;GO:0006996;GO:0007010;GO:0007017;GO:0007020;GO:0007026;GO:0007051;GO:0007052;GO:0009987;GO:0010564;GO:0010639;GO:0010948;GO:0016043;GO:0022402;GO:0022607;GO:0031110;GO:0031111;GO:0031114;GO:0032886;GO:0032932;GO:0033043;GO:0043242;GO:0043244;GO:0048519;GO:0048523;GO:0050789;GO:0050794;GO:0051128;GO:0051129;GO:0051225;GO:0051301;GO:0051493;GO:0051494;GO:0051726;GO:0065007;GO:0070507;GO:…	GO:0005198;GO:0005200	GO:0005635;GO:0005829;GO:0005874;GO:0005875;GO:0005876;GO:0031967;GO:0031975;GO:0032991;GO:0043234;GO:0044422;GO:0044424;GO:0044428;GO:0044430;GO:0044444;GO:0044446;GO:0044464;GO:0051233	GO:0006996;GO:0007010;GO:0009987;GO:0016043;GO:0022607;GO:0033043;GO:0051301;GO:0051726;GO:0065007;GO:0070925	GO:0005635;GO:0005829;GO:0032991;GO:0043234;GO:0044464	CADANIAG00001655	CADANIAP00001655	CADANIAT00001655			stu1	IPR011989;IPR016024;IPR024395;IPR021133	ARM-like;ARM-type_fold;CLASP_N_dom;HEAT_type_2					PF12348			PS50077	HEAT_REPEAT	Protein stu1					Emericella nidulans (strain FGSC A4 / ATCC 38163 / CBS 112.46 / NRRL 194 / M139)	STU1_EMENI			NOG81443
G5EAZ2;C8V649		mitochondrial genome maintenance;cellular aromatic compound metabolic process;vitamin metabolic process;water-soluble vitamin metabolic process;thiamine metabolic process;sulfur compound metabolic process;nitrogen compound metabolic process;response to stress;organelle organization;mitochondrion organization;metabolic process;biosynthetic process;vitamin biosynthetic process;thiamine biosynthetic…	binding;iron ion binding;ferrous iron binding;ion binding;cation binding;metal ion binding;transition metal ion binding	nucleus;cytosol;organelle;membrane-bounded organelle;intracellular organelle;intracellular membrane-bounded organelle;intracellular part;cytoplasmic part;cell part	cellular aromatic compound metabolic process;vitamin metabolic process;sulfur compound metabolic process;nitrogen compound metabolic process;response to stress;organelle organization;mitochondrion organization;metabolic process;biosynthetic process;cellular process;cellular component organization;cellular nitrogen compound metabolic process;cellular metabolic process;small molecule metabolic proc…	nucleus;cytosol;organelle;intracellular organelle;intracellular membrane-bounded organelle;cell part				Completeproteome;Cytoplasm;Iron;Metal-binding;NAD;Nucleus;Referenceproteome;Thiaminebiosynthesis		GO:0000002;GO:0006725;GO:0006766;GO:0006767;GO:0006772;GO:0006790;GO:0006807;GO:0006950;GO:0006996;GO:0007005;GO:0008152;GO:0009058;GO:0009110;GO:0009228;GO:0009987;GO:0016043;GO:0018130;GO:0019438;GO:0034641;GO:0042364;GO:0042723;GO:0042724;GO:0044237;GO:0044249;GO:0044271;GO:0044272;GO:0044281;GO:0044283;GO:0046483;GO:0050896;GO:0071840;GO:0071841;GO:0071842	GO:0005488;GO:0005506;GO:0008198;GO:0043167;GO:0043169;GO:0046872;GO:0046914	GO:0005634;GO:0005829;GO:0043226;GO:0043227;GO:0043229;GO:0043231;GO:0044424;GO:0044444;GO:0044464	GO:0006725;GO:0006766;GO:0006790;GO:0006807;GO:0006950;GO:0006996;GO:0007005;GO:0008152;GO:0009058;GO:0009987;GO:0016043;GO:0034641;GO:0044237;GO:0044281;GO:0046483;GO:0050896	GO:0005634;GO:0005829;GO:0043226;GO:0043229;GO:0043231;GO:0044464	CADANIAG00004767	CADANIAP00004767	CADANIAT00004767			thiA	IPR027495;IPR002922	Sti35;Thi4_fam										Thiamine thiazole synthase					Emericella nidulans (strain FGSC A4 / ATCC 38163 / CBS 112.46 / NRRL 194 / M139)	THI4_EMENI
Q5B4H1;C8V868		protein targeting;protein targeting to mitochondrion;transport;mitochondrial transport;intracellular protein transport;cellular process;protein transport;protein import;protein import into mitochondrial matrix;establishment of protein localization;intracellular transport;establishment of localization;establishment of localization in cell;transmembrane transport;intracellular protein transmembrane…	ATPase activator activity;transporter activity;enzyme activator activity;protein transporter activity;substrate-specific transporter activity;enzyme regulator activity;nucleoside-triphosphatase regulator activity;ATPase regulator activity	presequence translocase-associated import motor;integral to membrane;intrinsic to membrane;macromolecular complex;protein complex;organelle part;intracellular part;membrane part;mitochondrial part;cytoplasmic part;intracellular organelle part;mitochondrial membrane part;cell part	protein targeting;transport;cellular process;protein transport;establishment of localization;transmembrane transport	macromolecular complex;protein complex;cell part		DnaJ		Chaperone;Completeproteome;Membrane;Mitochondrion;Mitochondrioninnermembrane;Proteintransport;Referenceproteome;Translocation;Transmembrane;Transmembranehelix;Transport		GO:0006605;GO:0006626;GO:0006810;GO:0006839;GO:0006886;GO:0009987;GO:0015031;GO:0017038;GO:0030150;GO:0045184;GO:0046907;GO:0051234;GO:0051649;GO:0055085;GO:0065002;GO:0071806;GO:0072594;GO:0072655	GO:0001671;GO:0005215;GO:0008047;GO:0008565;GO:0022892;GO:0030234;GO:0060589;GO:0060590	GO:0001405;GO:0016021;GO:0031224;GO:0032991;GO:0043234;GO:0044422;GO:0044424;GO:0044425;GO:0044429;GO:0044444;GO:0044446;GO:0044455;GO:0044464	GO:0006605;GO:0006810;GO:0009987;GO:0015031;GO:0051234;GO:0055085	GO:0032991;GO:0043234;GO:0044464	CADANIAG00005879	CADANIAP00005879	CADANIAT00005879			pam18	IPR001623	DnaJ_domain					PF00226					Mitochondrial import inner membrane translocase subunit tim14			SM00271	DnaJ	Emericella nidulans (strain FGSC A4 / ATCC 38163 / CBS 112.46 / NRRL 194 / M139)	TIM14_EMENI			COG2214
O42777;C8VFW3;Q5B1E5		reproduction;developmental process involved in reproduction;response to stress;cell communication;response to temperature stimulus;cellular response to starvation;response to heat;response to external stimulus;response to abiotic stimulus;cellular process;response to extracellular stimulus;sexual reproduction;reproductive process in single-celled organism;reproductive process;cell differentiation…	catalytic activity;hydrolase activity, hydrolyzing O-glycosyl compounds;alpha,alpha-trehalase activity;binding;calcium ion binding;trehalase activity;hydrolase activity;hydrolase activity, acting on glycosyl bonds;ion binding;cation binding;metal ion binding	cytosol;intracellular part;cytoplasmic part;cell part	reproduction;response to stress;cell communication;response to heat;response to external stimulus;response to abiotic stimulus;cellular process;response to extracellular stimulus;cell differentiation;ascospore formation;developmental process;response to starvation;sporulation;cell development;anatomical structure formation involved in morphogenesis;anatomical structure development;response to sti…	cytosol;cell part	Starch and sucrose metabolism	Trehalase;Trehalase_Ca-bi		Completeproteome;Cytoplasm;Glycosidase;Hydrolase;Referenceproteome		GO:0000003;GO:0003006;GO:0006950;GO:0007154;GO:0009266;GO:0009267;GO:0009408;GO:0009605;GO:0009628;GO:0009987;GO:0009991;GO:0019953;GO:0022413;GO:0022414;GO:0030154;GO:0030435;GO:0030437;GO:0031667;GO:0031668;GO:0031669;GO:0032502;GO:0033554;GO:0034293;GO:0034605;GO:0042594;GO:0043934;GO:0043935;GO:0048468;GO:0048610;GO:0048646;GO:0048856;GO:0048869;GO:0050896;GO:0051716;GO:0071496	GO:0003824;GO:0004553;GO:0004555;GO:0005488;GO:0005509;GO:0015927;GO:0016787;GO:0016798;GO:0043167;GO:0043169;GO:0046872	GO:0005829;GO:0044424;GO:0044444;GO:0044464	GO:0000003;GO:0006950;GO:0007154;GO:0009408;GO:0009605;GO:0009628;GO:0009987;GO:0009991;GO:0030154;GO:0030437;GO:0032502;GO:0042594;GO:0043934;GO:0048468;GO:0048646;GO:0048856;GO:0050896	GO:0005829;GO:0044464	CADANIAG00003435	CADANIAP00003435	CADANIAT00003435			treB	IPR008928;IPR001661;IPR018232;IPR011120	6-hairpin_glycosidase-like;Glyco_hydro_37;Glyco_hydro_37_CS;Trehalase_Ca-bd	ko00500				PF01204;PF07492	PR00744	GLHYDRLASE37	PS00927;PS00928	TREHALASE_1;TREHALASE_2	Neutral trehalase					Emericella nidulans (strain FGSC A4 / ATCC 38163 / CBS 112.46 / NRRL 194 / M139)	TREB_EMENI		3.2.1.28	COG1626
P06531;C8VS06;Q5BFN2;Q92224		tryptophan biosynthetic process;organic acid metabolic process;cellular amino acid metabolic process;glutamine metabolic process;tryptophan metabolic process;cellular biogenic amine metabolic process;indolalkylamine metabolic process;cellular aromatic compound metabolic process;nitrogen compound metabolic process;metabolic process;cellular amino acid biosynthetic process;biosynthetic process;glut…	catalytic activity;anthranilate synthase activity;indole-3-glycerol-phosphate synthase activity;phosphoribosylanthranilate isomerase activity;transferase activity;lyase activity;carbon-carbon lyase activity;carboxy-lyase activity;aldehyde-lyase activity;oxo-acid-lyase activity;isomerase activity;intramolecular oxidoreductase activity;intramolecular oxidoreductase activity, interconverting aldoses…	cytosol;anthranilate synthase complex;macromolecular complex;protein complex;intracellular part;cytoplasmic part;cell part	organic acid metabolic process;cellular amino acid metabolic process;cellular aromatic compound metabolic process;nitrogen compound metabolic process;metabolic process;biosynthetic process;amine metabolic process;cellular process;cellular nitrogen compound metabolic process;cellular ketone metabolic process;cellular metabolic process;primary metabolic process;small molecule metabolic process;hete…	cytosol;macromolecular complex;protein complex;cell part		GATase;IGPS;PRAI		Amino-acidbiosynthesis;Aromaticaminoacidbiosynthesis;Completeproteome;Decarboxylase;Glutamineamidotransferase;Isomerase;Lyase;Multifunctionalenzyme;Referenceproteome;Transferase;Tryptophanbiosynthesis		GO:0000162;GO:0006082;GO:0006520;GO:0006541;GO:0006568;GO:0006576;GO:0006586;GO:0006725;GO:0006807;GO:0008152;GO:0008652;GO:0009058;GO:0009064;GO:0009072;GO:0009073;GO:0009308;GO:0009309;GO:0009987;GO:0016053;GO:0018130;GO:0019438;GO:0019752;GO:0034641;GO:0042180;GO:0042401;GO:0042430;GO:0042435;GO:0043436;GO:0043648;GO:0044106;GO:0044237;GO:0044238;GO:0044249;GO:0044271;GO:0044281;GO:0044283;GO:…	GO:0003824;GO:0004049;GO:0004425;GO:0004640;GO:0016740;GO:0016829;GO:0016830;GO:0016831;GO:0016832;GO:0016833;GO:0016853;GO:0016860;GO:0016861;GO:0033984	GO:0005829;GO:0005950;GO:0032991;GO:0043234;GO:0044424;GO:0044444;GO:0044464	GO:0006082;GO:0006520;GO:0006725;GO:0006807;GO:0008152;GO:0009058;GO:0009308;GO:0009987;GO:0034641;GO:0042180;GO:0044237;GO:0044238;GO:0044281;GO:0046483	GO:0005829;GO:0032991;GO:0043234;GO:0044464	CADANIAG00002028	CADANIAP00002028	CADANIAT00002028			trpC	IPR013785;IPR016302;IPR029062;IPR017926;IPR013798;IPR001468;IPR001240;IPR011060;IPR006221	Aldolase_TIM;Anthranilate_synth_II;Class_I_gatase-like;GATASE;Indole-3-glycerol_P_synth;Indole-3-GlycerolPSynthase_CS;PRAI;RibuloseP-bd_barrel;TrpG/PapA_dom					PF00117;PF00218;PF00697			PS51273;PS00614	GATASE_TYPE_1;IGPS	Multifunctional tryptophan biosynthesis protein;Anthranilate synthase component 2;Indole-3-glycerol phosphate synthase;N-(5'-phosphoribosyl)anthranilate isomerase					Emericella nidulans (strain FGSC A4 / ATCC 38163 / CBS 112.46 / NRRL 194 / M139)	TRPG_EMENI		4.1.3.27;4.1.1.48;5.3.1.24	COG0134
Q5AW46;C8VBG1		response to stress;response to osmotic stress;response to abiotic stimulus;cellular process;cellular response to stress;response to stimulus;cellular response to stimulus;cellular response to abiotic stimulus;cellular response to osmotic stress			response to stress;response to osmotic stress;response to abiotic stimulus;cellular process;response to stimulus			DUF1349		Completeproteome;Referenceproteome;Stressresponse		GO:0006950;GO:0006970;GO:0009628;GO:0009987;GO:0033554;GO:0050896;GO:0051716;GO:0071214;GO:0071470			GO:0006950;GO:0006970;GO:0009628;GO:0009987;GO:0050896		CADANIAG00000578	CADANIAP00000578	CADANIAT00000578			AN7484	IPR013320;IPR009784	ConA-like_dom;DUF1349					PF07081					Uncharacterized protein AN7484					Emericella nidulans (strain FGSC A4 / ATCC 38163 / CBS 112.46 / NRRL 194 / M139)	Y7484_EMENI			NOG136129
[truncated: 12,441 more rows]
