# Supplementary material for: A seven-transmembrane methyltransferase catalysing N-terminal histidine methylation of lytic polysaccharide monooxygenases
Source: Research Square preprint supplement (doi:10.21203/rs.3.rs-2289157/v1), 2022-12-21
Supplement: Supplementary file 4 [file ad4968c9cd5bf68947809e58.xlsx]

## Sheet: Sample info
Samples ID	Type of sample	Signal peptide	Comment	Sequence (Signal peptide sequence in green, LsAA9A sequence in red)
LsAA9	Concentrated/buffer exchanged secretome	α-MF	Strain expressing LsAA9A	MRFPSIFTAVLFAASSALAAPVNTTTEDETAQIPAEAVIGYSDLEGDFDVAVLPFSNSTNNGLLFINTTIASIAAKEEGVSLEKREAEAHTLVWGVWVNGVDQGDGRNIYIRSPPNNNPVKNLTSPDMTCNVDNRVVPKSVPVNAGDTLTFEWYHNTRDDDIIASSHHGPIAVYIAPAASNGQGNVWVKLFEDAYNVTNSTWAVDRLITAHGQHSVVVPHVAPGDYLFRAEIIALHEADSLYSQNPIRGAQFYISCAQITINSSDDSTPLPAGVPFPGAYTDSTPGIQFNIYTTPATSYVAPPPSVWSGALGGSIAQVGDASLE
LsAA9 + MTe	Concentrated/buffer exchanged secretome	α-MF	Strain expressing LsAA9A and AN4663 with DNA sequence optimized for E.coli	MRFPSIFTAVLFAASSALAAPVNTTTEDETAQIPAEAVIGYSDLEGDFDVAVLPFSNSTNNGLLFINTTIASIAAKEEGVSLEKREAEAHTLVWGVWVNGVDQGDGRNIYIRSPPNNNPVKNLTSPDMTCNVDNRVVPKSVPVNAGDTLTFEWYHNTRDDDIIASSHHGPIAVYIAPAASNGQGNVWVKLFEDAYNVTNSTWAVDRLITAHGQHSVVVPHVAPGDYLFRAEIIALHEADSLYSQNPIRGAQFYISCAQITINSSDDSTPLPAGVPFPGAYTDSTPGIQFNIYTTPATSYVAPPPSVWSGALGGSIAQVGDASLE
LsAA9A + MTn	Concentrated/buffer exchanged secretome	α-MF	Strain expressing LsAA9A and AN4663 with the NATIVE DNA sequence from Aspergillus nidulans	MRFPSIFTAVLFAASSALAAPVNTTTEDETAQIPAEAVIGYSDLEGDFDVAVLPFSNSTNNGLLFINTTIASIAAKEEGVSLEKREAEAHTLVWGVWVNGVDQGDGRNIYIRSPPNNNPVKNLTSPDMTCNVDNRVVPKSVPVNAGDTLTFEWYHNTRDDDIIASSHHGPIAVYIAPAASNGQGNVWVKLFEDAYNVTNSTWAVDRLITAHGQHSVVVPHVAPGDYLFRAEIIALHEADSLYSQNPIRGAQFYISCAQITINSSDDSTPLPAGVPFPGAYTDSTPGIQFNIYTTPATSYVAPPPSVWSGALGGSIAQVGDASLE
This sheet contains quantitative information of LsAA9A N-terminal peptides identified with alpha-mating factor signal peptide after processing with MaxQuant software.

## Sheet: N-term LsAA9A
Peptide	Concentrated-LSAA9	Concentrated-LSAA9_MTe	Concentrated-LSAA9_MTn
EAEAHTLVWGVW	0	6546400000	9238600000
EAEAHTLVWGVWVNGVDQGDGRNIY	379760000	2954800000	2253100000
EAEAHTLVWGV	0	378820000	1128100000
EAEAHTLVW	35740000	254270000	877970000
EAEAHTLVWGVWVNGVDQGDGRN	0	119660000	94145000
EAEAHTLVWGVWVNGVDQGDGR	0	102340000	63030000
EAEAHTLVWGVWVNGVDQGD	14615000	77653000	0
EAEAHTLVWGVWV	0	14905000	0
EAEAHTLVWGVWVNGVD	0	12367000	0
EAEAHTLVWG	0	0	6354900000
EAEAHTLVWGVWVNGVDQGDGRNI	0	0	19999000
AEAHTLVWGVWVNGVDQGDGR	0	0	0
EAHTLVWGVWVNGVDQGDGR	0	0	0
TLVWGVWVNGVDQGDGR	0	0	0
EAEAHTLVWGVWVNGVDQG	0	0	0
EAEAHTLVWGVWVNG	0	0	0
AHTLVWGVWVNGVDQGDGR	0	0	0
EAEAHTLVWGVWVN	0	0	0
EAEAHTLVWGVWVNGVDQGDG	0	0	0
EAEAHTLVWGVWVNGVDQ	0	0	0
HTLVWGVWVNGVDQGDGR	0	0	0
