# Supplementary material for: A seven-transmembrane methyltransferase catalysing N-terminal histidine methylation of lytic polysaccharide monooxygenases
Source: Research Square preprint supplement (doi:10.21203/rs.3.rs-2289157/v1), 2022-12-21
Supplement: Supplementary file 5 [file ba9c503be0597a0f5f9c9d9e.xlsx]

## Sheet: Information
Supplementary table 1
This table contains protein group identifications from the large scale proteomics analysis of Aspergillus nidulans. Three major proteomics analysis were performed as described below.
Candidates: Methyltransferases candidates which were short listed based on differential abundance.
TMT: A. nidulans cells grown on different carbon sources were analyzed using TMT-11 tags.
	Reporter intensities 0 - 3 correspond to replicates of cells grown on cellulose.
	Reporter intensities 4 - 7 correspond to replicates of cells grown on minimal media with glucose.
	Reporter intensities 8-10 correspond to cells grown on potato dextrose.
LFQ: A. nidulans cells grown on different carbon sources were analyzed using a label free approach independently.
	CE = Cellulose
	MM = Minimal media (with glucose)
	PD = Potato dextrose
Deep proteome: Equal peptide amounts of A. nidulan grown on different carbon sources were mixed and fractioned to generate a large label-free proteome dataset.

## Sheet: TMT
Reporter.intensity.0	Reporter.intensity.1	Reporter.intensity.2	Reporter.intensity.3	Reporter.intensity.4	Reporter.intensity.5	Reporter.intensity.6	Reporter.intensity.7	Reporter.intensity.8	Reporter.intensity.9	Reporter.intensity.10	T: Protein.IDs	T: Gene name	Mtase	C: Student's T-test Significant MM_CE	N: Student's T-test Difference MM_CE	N: -Log Student's T-test p-value MM_CE	C: Student's T-test Significant PD_CE	N: Student's T-test Difference PD_CE	N: -Log Student's T-test p-value PD_CE	C: GOMF name	C: GOBP slim name	C: KEGG name	C: Pfam	C: Interpro	C: Interpro name	C: Prosite	C: Prosite name	C: Protein name	C: Cross-reference (CAZy)	C: Cross-reference (Pfam)	C: Student's T-test significant	C: Student's T-test significant	N: Peptides	N: Razor...unique.peptides	N: Unique.peptides	N: Sequence.coverage....	N: Unique...razor.sequence.coverage....	N: Unique.sequence.coverage....	N: Mol..weight..kDa.	C: Only.identified.by.site	N: Q.value	N: Score	N: Intensity	N: MS.MS.count	N: Student's T-test q-value MM_CE	N: Student's T-test Test statistic MM_CE	N: Student's T-test q-value PD_CE	N: Student's T-test Test statistic PD_CE	T: Majority.protein.IDs
15.2341	14.6869	15.8686	14.5286	14.0526	13.6272	13.6408	13.5265	15.6333	15.9683	14.9328	A0A1U8QFC3			+	1.36779	2.24972	+	1.7997	2.79929											PF00067	MM_CE	PD_CE	3	3	3	5.6	5.6	5.6	62.669		0	5.6399	88266000	4	0.00214422	4.20939	0.000654213	6.20512	A0A1U8QFC3
17.8259	17.8335	18.3411	18.8262	19.4841	19.4343	19.347	19.5357	19.4814	19.6068	18.9196	A0A1U8QNG8			+	-1.24355	2.66553		-0.114276	0.25194											PF00941;PF01315;PF01799;PF02738;PF03450	MM_CE		21	21	21	15.8	15.8	15.8	147.92		0	87.138	1041100000	28	0.00108418	-5.12855	0.590604	-0.624255	A0A1U8QNG8
15.6523	15.6105	15.6267	15.9609	16.2076	16.2808	16.2819	16.5302	18.0749	17.8198	17.5798	A0A1U8QTA2			+	-0.612541	2.86624	+	1.49969	3.82565											PF00724	MM_CE	PD_CE	8	8	8	22.4	22.4	22.4	42.403		0	42.789	222470000	10	0.000735014	-5.616	0.000152842	10.2846	A0A1U8QTA2
17.7398	17.9059	17.986	17.3065	16.0589	15.9004	15.95	15.8518	17.7987	18.1793	17.373	A0A1U8QYW8			+	1.79432	4.55461	+	1.84343	3.57959											PF13813	MM_CE	PD_CE	5	5	5	9.6	9.6	9.6	48.595		0	16.943	1039100000	8	0	11.3591	0.000220566	9.13565	A0A1U8QYW8
15.2363	15.25	15.1923	15.646	16.261	16.6714	16.7586	16.7226	16.0073	15.7245	15.7272	A7XRY0			+	-1.27227	3.7295	+	-0.78373	2.37636											PF00501;PF00550;PF00975	MM_CE	PD_CE	5	5	5	5.6	5.6	5.6	107.59		0	9.7656	89735000	5	0.000283186	-8.12695	0.00169564	-4.9722	A7XRY0
15.9837	15.8559	16.2344	16.7049	18.1404	18.6124	18.8687	19.0754	15.8591	16.0305	15.8438	A7XRY3			+	-2.47949	3.98045	+	-2.76309	4.02987											PF11991	MM_CE	PD_CE	6	6	6	14.3	14.3	14.3	45.992		0	47.282	827570000	11	0.000151899	-9.01015	6.25698e-05	-11.3378	A7XRY3
16.7485	16.8085	16.7419	17.0481	18.1656	18.5567	18.693	18.988	16.9215	17.1543	17.0471	A7XRY6			+	-1.76403	4.11563	+	-1.55981	3.15968												MM_CE	PD_CE	10	10	10	26.8	26.8	26.8	37.62		0	30.677	898420000	13	0.000174475	-9.51991	0.000381257	-7.43827	A7XRY6
14.8074	14.7629	14.9006	15.9401	16.8652	17.0744	17.3357	17.268	14.9346	14.9681	14.6748	A7XRZ1			+	-2.03305	3.29802	+	-2.27661	4.68666												MM_CE	PD_CE	4	4	4	13.2	13.2	13.2	35.718		0	8.3346	285090000	4	0.000459224	-6.77961	0.000132388	-15.4574	A7XRZ1
19.293	19.1838	19.1213	19.2554	18.621	18.6629	18.6739	18.6659	19.1296	19.1801	19.4268	C8UZU5	ANIA_05906		+	0.557436	5.07337	+	0.589602	3.19042	acid-amino acid ligase activity;catalytic activity;ligase activity;ligase activity, forming carbon-nitrogen bonds;small conjugating protein ligase activity;ubiquitin-protein ligase activity			U-box	IPR003613;IPR011990;IPR013026;IPR013083;IPR019734	TPR_repeat;TPR-contain_dom;TPR-like_helical_dom;Ubox_domain;Znf_RING/FYVE/PHD	PS50005;PS50293;PS51698	TPR;TPR_REGION;U_BOX			PF04564	MM_CE	PD_CE	11	11	11	40.3	40.3	40.3	33.179		0	56.451	1359400000	16	0	13.9533	0.000318083	7.55237	C8UZU5
17.6963	17.7569	17.8127	17.6835	17.6402	17.5907	17.6908	17.6143	17.7194	17.7094	17.816	C8UZV3	ANIA_05898		+	0.10332	1.51382	+	0.114273	1.51975		biological regulation		NOT2_3_5	IPR007282	NOT					PF04153	MM_CE	PD_CE	13	13	13	36.8	36.8	36.8	49.321		0	130.73	1717500000	27	0.00962907	2.81307	0.0116357	2.99661	C8UZV3
17.7756	18.0658	18.0812	17.4773	17.8008	17.6858	17.5388	17.6335	18.4444	18.4155	18.984	C8UZX9	ANIA_05875			0.185247	0.567054	+	0.949895	2.62322	binding;nucleic acid binding;RNA binding	cellular metabolic process;cellular nitrogen compound metabolic process;cellular process;metabolic process;nitrogen compound metabolic process;nucleobase-containing compound metabolic process;primary metabolic process			IPR004087;IPR004088;IPR024166	KH_dom;KH_dom_type_1;rRNA_assembly_KRR1			KRR1 small subunit processome component		PF17903		PD_CE	7	7	7	18.4	18.4	18.4	41.466		0	36.657	669390000	12	0.126102	1.21224	0.000930865	5.66637	C8UZX9
13.8775	13.8879	14.0807	13.7984	14.397	14.5126	14.5716	14.687	13.799	13.9327	14.1369	C8UZY1	ANIA_05874	x	+	-0.630928	3.50921	+	-0.585859	2.5237	catalytic activity;methyltransferase activity;S-adenosylmethionine-dependent methyltransferase activity;transferase activity;transferase activity, transferring one-carbon groups	cellular metabolic process;cellular process;metabolic process;one-carbon metabolic process;small molecule metabolic process			IPR029063	SAM-dependent_MTases						MM_CE	PD_CE	2	2	2	7.4	7.4	7.4	32.991		0	6.1839	18923000	2	0.000387097	-7.4138	0.00119439	-5.37836	C8UZY1
17.763	17.8222	17.7404	17.8283	17.6843	17.612	17.6889	17.603	17.7319	17.6351	17.5039	C8UZY3	ANIA_05873		+	0.141445	2.37523		-0.0233982	0.142931	binding;cytoskeletal protein binding;gamma-tubulin binding;protein binding;structural constituent of cytoskeleton;structural molecule activity;tubulin binding	biological regulation;cellular component assembly;cellular component movement;cellular component organization;cellular localization;cellular process;cytokinesis;cytoskeleton organization;cytoskeleton-dependent intracellular transport;establishment of localization;establishment or maintenance of cell polarity;localization;organelle assembly;organelle organization;regulation of cell cycle;regulatio…		Spc97_Spc98	IPR007259	TUBGCP					PF04130;PF17681	MM_CE		16	16	16	20.1	20.1	20.1	98.884		0	47.735	711820000	17	0.00179085	4.47502	0.765089	-0.379984	C8UZY3
17.1195	17.3244	17.5061	16.9656	17.0147	16.8537	16.9487	16.9682	17.7039	17.6006	18.2309	C8UZY5	ANIA_05871	x	+	0.282584	1.21453	+	0.898812	2.51232	catalytic activity;methyltransferase activity;RNA methyltransferase activity;rRNA (adenine) methyltransferase activity;rRNA methyltransferase activity;S-adenosylmethionine-dependent methyltransferase activity;transferase activity;transferase activity, transferring one-carbon groups	cellular process;ribosomal large subunit biogenesis		Methyltransf_8	IPR007823;IPR029063	Methyltransferase-rel;SAM-dependent_MTases					PF05148	MM_CE	PD_CE	9	9	9	22.4	22.4	22.4	46.069		0	31.82	471930000	10	0.0202863	2.30096	0.00121497	5.34614	C8UZY5
18.4233	18.4702	18.7792	18.6381	18.5395	18.4819	18.6328	18.5727	18.0728	18.0571	17.9614	C8UZY7	ANIA_10752			0.0209627	0.0870444	+	-0.526285	3.98877													PD_CE	22	22	22	45.7	45.7	45.7	45.112		0	129.93	5809100000	31	0.715408	0.239917	0.000128342	-11.1181	C8UZY7
19.4949	19.4236	19.6761	19.5569	19.3096	19.2816	19.252	19.2251	19.0352	18.9208	19.1218	C8UZY8	ANIA_10743		+	0.27077	2.51784	+	-0.241152	2.20431				BAR_2	IPR018859;IPR027267	AH/BAR-dom;BAR_dom-cont					PF10455	MM_CE	PD_CE	13	13	13	53.2	53.2	53.2	33.306		0	190.93	14059000000	33	0.00149243	4.7889	0.00254917	-4.52619	C8UZY8
14.1364	14.2	14.1106	14.1364	13.8317	14.0752	13.9326	14.1406	13.8398	14.0575	13.9542	C8UZY9	ANIA_05868		+	0.150813	1.08764		-0.0445433	0.175367		alcohol metabolic process;biological regulation;biosynthetic process;cellular component organization;cellular lipid metabolic process;cellular membrane organization;cellular metabolic process;cellular process;endocytosis;establishment of localization;lipid metabolic process;lipid transport;macromolecule metabolic process;macromolecule modification;membrane invagination;membrane organization;metab…		Arv1	IPR007290	Arv1					PF04161	MM_CE		1	1	1	2.7	2.7	2.7	44.335		0.0011466	2.7703	14136000	1	0.0284698	2.08888	0.711973	-0.455602	C8UZY9
17.2051	17.1529	16.9821	16.9596	16.7081	16.5547	16.4834	16.5113	17.6208	17.5603	18.4021	C8UZZ1	ANIA_05866		+	0.510521	3.18337	+	1.29665	2.57711	acetyltransferase activity;aralkylamine N-acetyltransferase activity;catalytic activity;diamine N-acetyltransferase activity;N-acetyltransferase activity;N-acyltransferase activity;transferase activity;transferase activity, transferring acyl groups;transferase activity, transferring acyl groups other than amino-acyl groups	cellular component organization;cellular process;chromatin organization;chromosome organization;organelle organization		Acetyltransf_1	IPR000182;IPR016181	Acyl_CoA_acyltransferase;GNAT_dom	PS51186	GNAT			PF00583	MM_CE	PD_CE	3	3	3	11.8	11.8	11.8	32.331		0	10.364	535540000	5	0.000446991	6.45408	0.00109278	5.5315	C8UZZ1
18.2866	18.2597	18.3244	18.3578	18.4912	18.5091	18.6234	18.5312	18.157	18.0259	17.8756	C8UZZ9	ANIA_10751		+	-0.231611	3.15063	+	-0.519233	2.97921												MM_CE	PD_CE	21	21	21	47.4	47.4	47.4	37.556		0	147.49	5210700000	32	0.000434238	-6.36339	0.000532075	-6.79748	C8UZZ9
17.171	17.1353	17.9255	17.261	17.3856	17.1501	17.2845	17.3105	16.923	16.8836	17.2464	C8V000	ANIA_10736			0.0905204	0.184054	+	-0.265011	1.1881				DUF3824	IPR024436	DUF3824					PF12868		PD_CE	10	10	10	25.4	25.4	25.4	52.424		0	40.911	864890000	14	0.482753	0.470588	0.0277976	-2.35878	C8V000
17.0021	16.9256	17.2051	17.0417	16.9736	16.8817	17.0846	16.9409	17.0674	16.8066	16.8442	C8V002	ANIA_05856			0.0734105	0.453519		-0.0641548	0.315883	cation transmembrane transporter activity;divalent inorganic cation transmembrane transporter activity;inorganic cation transmembrane transporter activity;ion transmembrane transporter activity;magnesium ion transmembrane transporter activity;metal ion transmembrane transporter activity;substrate-specific transmembrane transporter activity;substrate-specific transporter activity;transmembrane tra…	biological regulation;cellular homeostasis;cellular ion homeostasis;cellular process;homeostatic process		CorA	IPR002523	MgTranspt_CorA/ZnTranspt_ZntB					PF01544			8	8	8	9.7	9.7	9.7	96.893		0	15.722	311390000	8	0.181402	1.00893	0.50536	-0.756976	C8V002
19.517	19.5358	19.257	19.6411	19.7777	19.7647	19.8502	19.7543	19.6273	19.5218	19.3219	C8V007	ANIA_10735		+	-0.299051	1.91361	+	-0.296437	1.87313												MM_CE	PD_CE	56	56	56	25.6	25.6	25.6	337.57		0	323.31	2328300000	68	0.00395602	-3.54122	0.00528043	-3.7428	C8V007
19.8936	19.903	19.6648	20.017	20.3321	20.2637	20.4118	20.1547	19.794	19.667	19.4785	C8V008	ANIA_10750		+	-0.420971	2.42807	+	-0.644084	2.86953												MM_CE	PD_CE	49	49	49	28.9	28.9	28.9	212.64		0	323.31	5436200000	66	0.0016135	-4.58979	0.000632038	-6.43111	C8V008
18.2914	18.1348	18.3226	18.2914	18.6412	18.7095	18.8063	18.7842	18.2048	18.2783	18.0397	C8V010	ANIA_05849		+	-0.475274	3.80627	+	-0.561041	3.20108	binding;cation binding;ion binding;metal ion binding;nucleic acid binding transcription factor activity;sequence-specific DNA binding RNA polymerase II transcription factor activity;sequence-specific DNA binding transcription factor activity;transition metal ion binding;zinc ion binding			Zn_clus	IPR001138	Zn2-C6_fun-type_DNA-bd	PS00463;PS50048	ZN2_CY6_FUNGAL_1;ZN2_CY6_FUNGAL_2			PF00172	MM_CE	PD_CE	19	19	19	16.9	16.9	16.9	119.95		0	49.662	1982600000	23	0.000304762	-8.38881	0.000321056	-7.5923	C8V010
17.2555	16.9343	17.2175	16.3772	15.7127	15.5156	15.478	15.4182	16.814	17.2548	17.058	C8V013	ANIA_05846		+	1.415	3.25574	+	1.51117	4.0717	binding;catalytic activity;coenzyme binding;cofactor binding;flavin adenine dinucleotide binding;oxidoreductase activity;oxidoreductase activity, acting on CH-OH group of donors;oxidoreductase activity, acting on the CH-OH group of donors, NAD or NADP as acceptor;UDP-N-acetylmuramate dehydrogenase activity			BBE;FAD_binding_4	IPR006094;IPR012951;IPR016166;IPR016167;IPR016169	BBE;CO_DH_flavot_FAD-bd_sub2;FAD-bd_2;FAD-bd_2_sub1;Oxid_FAD_bind_N	PS51387	FAD_PCMH			PF01565;PF08031	MM_CE	PD_CE	5	5	5	11.2	11.2	11.2	52.103		0	19.208	283640000	7	0.000441736	6.6581	6.45905e-05	11.5655	C8V013
18.788	18.6225	19.5759	18.5098	18.4725	18.2731	18.2494	18.3857	18.5222	18.6803	19.125	C8V019	ANIA_10740		+	0.52888	1.12257	+	0.430677	1.33898	structural constituent of ribosome;structural molecule activity	biosynthetic process;cellular metabolic process;cellular process;macromolecule metabolic process;metabolic process;primary metabolic process;protein metabolic process;translation		Ribosomal_L19e	IPR000196;IPR015972;IPR015974;IPR023638;IPR027547	Ribosomal_L19/L19e;Ribosomal_L19/L19e_CS;Ribosomal_L19/L19e_dom;Ribosomal_L19/L19e_dom1;Ribosomal_L19/L19e_dom3	PS00526	RIBOSOMAL_L19E	Ribosomal protein L19		PF01280	MM_CE	PD_CE	9	9	9	28.4	28.4	28.4	22.462		0	51.617	7812400000	20	0.0256063	2.14707	0.0183448	2.6429	C8V019
21.4302	21.5227	21.4656	21.5227	21.5634	21.5086	21.5368	21.4372	21.5366	21.5724	21.4539	C8V020	ANIA_10734			-0.0262055	0.311757		0.00946172	0.0774905		biological regulation;regulation of translation		DUF3554	IPR011989;IPR016024;IPR021133;IPR022716;IPR026827	ARM-like;ARM-type_fold;DUF3554;ECM29/GCN1;HEAT_type_2	PS50077	HEAT_REPEAT			PF12074			72	72	72	27.1	27.1	27.1	291.81		0	323.31	15829000000	141	0.296198	-0.738994	0.873976	0.217272	C8V020
16.994	16.9908	16.9949	17.0803	17.0214	17.0156	17.0236	17.0014	16.7566	16.8255	16.9593	C8V026	ANIA_10747			-0.000473976	0.00710965	+	-0.168327	1.69559		lipid metabolic process;metabolic process;primary metabolic process		Patatin	IPR002641;IPR016035	Acyl_Trfase/lysoPLipase;Patatin/PLipase_A2-rel					PF01734		PD_CE	10	10	9	17.7	17.7	16.1	68.186		0	19.611	1166900000	11	0.973667	-0.0212142	0.00788401	-3.3578	C8V026
17.3212	17.2942	17.6541	17.3945	18.0472	18.1356	18.1368	18.1504	17.4851	17.281	17.4985	C8V027	ANIA_10746		+	-0.701504	3.75313	+	-0.695956	3.90355	binding;catalytic activity;cation binding;cofactor binding;ion binding;metal ion binding;molybdenum ion binding;pyridoxal phosphate binding;transition metal ion binding;vitamin B6 binding;vitamin binding			MOSC;MOSC_N	IPR005302;IPR005303;IPR011037	MoCF_Sase_C;MOSC_N;Pyrv_Knase-like_insert_dom	PS51340	MOSC			PF03473;PF03476	MM_CE	PD_CE	7	7	7	15.8	15.8	15.8	46.315		0	19.652	481560000	9	0.000289593	-8.20679	0.000164329	-10.6751	C8V027
19.8546	19.9169	19.6781	19.7354	19.2538	19.2562	19.2783	19.2818	19.7517	19.7519	20.0214	C8V028	ANIA_10745	x	+	0.528722	4.1412	+	0.574144	3.19971	binding;catalytic activity;cofactor binding;glycine hydroxymethyltransferase activity;hydroxymethyl-, formyl- and related transferase activity;pyridoxal phosphate binding;transferase activity;transferase activity, transferring one-carbon groups;vitamin B6 binding;vitamin binding	amine metabolic process;biosynthetic process;cellular amino acid metabolic process;cellular aromatic compound metabolic process;cellular ketone metabolic process;cellular metabolic process;cellular nitrogen compound metabolic process;cellular process;cofactor metabolic process;heterocycle metabolic process;metabolic process;nitrogen compound metabolic process;one-carbon metabolic process;organic …		SHMT	IPR001085;IPR015421;IPR015422;IPR015424;IPR019798	PyrdxlP-dep_Trfase;PyrdxlP-dep_Trfase_major_sub1;PyrdxlP-dep_Trfase_major_sub2;Ser_HO-MeTrfase;Ser_HO-MeTrfase_PLP_BS	PS00096	SHMT	Serine hydroxymethyltransferase		PF00464	MM_CE	PD_CE	15	14	14	21.7	20.2	20.2	66.34		0	143.24	12492000000	40	0.000180905	9.61916	0.000320879	7.58718	C8V028
13.9632	13.976	13.9519	13.9379	13.9447	14.285	14.1734	14.3424	13.462	13.7398	13.3788	C8V065	ANIA_10815		+	-0.229112	1.3886	+	-0.659513	2.29831	catalytic activity;oxidoreductase activity			adh_short	IPR002198;IPR002347;IPR016040	DH_sc/Rdtase_SDR;Glc/ribitol_DH;NAD(P)-bd_dom					PF00106	MM_CE	PD_CE	1	1	1	2.8	2.8	2.8	35.074		0.0032123	2.3054	45901000	1	0.0131512	-2.59621	0.00192444	-4.76626	C8V065
15.7024	15.6472	15.7639	16.2536	17.1628	17.178	17.5543	17.2748	15.669	15.9387	15.734	C8V066	ANIA_10811		+	-1.45069	3.90179	+	-1.51188	4.1312	binding;catalytic activity;cation binding;heme binding;ion binding;iron ion binding;metal ion binding;monooxygenase activity;oxidoreductase activity;oxidoreductase activity, acting on paired donors, with incorporation or reduction of molecular oxygen;tetrapyrrole binding;transition metal ion binding			p450	IPR001128;IPR002401;IPR017972	Cyt_P450;Cyt_P450_CS;Cyt_P450_E_grp-I	PS00086	CYTOCHROME_P450			PF00067	MM_CE	PD_CE	7	7	7	13.3	13.3	13.3	57.256		0	26.88	588300000	7	0.000251309	-8.72477	6.89655e-05	-11.897	C8V066
15.8088	15.8772	16.0284	15.7708	15.9289	15.7211	15.9473	15.7628	15.8023	15.6687	15.7501	C8V078	ANIA_10741			0.0312595	0.147518		-0.0996598	0.614574		biological regulation;regulation of cell cycle;regulation of protein modification process		Cyclin	IPR013763;IPR013922	Cyclin_PHO80-like;Cyclin-like					PF08613			3	3	3	12.9	12.9	12.9	27.003		0	11.97	109890000	4	0.55932	0.387153	0.181575	-1.32368	C8V078
18.226	18.2418	18.3453	18.153	18.0825	18.1251	18.0648	18.2268	18.2305	18.2252	18.2076	C8V086	ANIA_05817		+	0.116688	1.13732	+	0.0962818	1.11416	amino acid kinase activity;binding;catalytic activity;glutamate 5-kinase activity;kinase activity;nucleic acid binding;phosphotransferase activity, carboxyl group as acceptor;RNA binding;transferase activity;transferase activity, transferring phosphorus-containing groups	amine metabolic process;biosynthetic process;cellular amino acid metabolic process;cellular ketone metabolic process;cellular metabolic process;cellular nitrogen compound metabolic process;cellular process;heterocycle metabolic process;metabolic process;nitrogen compound metabolic process;organic acid metabolic process;phosphorus metabolic process;primary metabolic process;small molecule metaboli…		AA_kinase;PUA	IPR001048;IPR001057;IPR002478;IPR005715;IPR011529;IPR015947;IPR019797	Asp/Glu/Uridylate_kinase;Glu/AcGlu_kinase;Glu_5kinase;Glu_5kinase/COase_Synthase;Glutamate_5-kinase_CS;PUA;PUA-like_domain	PS00902;PS50890	GLUTAMATE_5_KINASE;PUA			PF00696;PF01472	MM_CE	PD_CE	9	9	9	18.6	18.6	18.6	45.587		0	89.721	1422000000	15	0.0245331	2.17169	0.0344123	2.22251	C8V086
18.9288	18.8319	18.8496	18.9169	18.9673	19.0289	18.9647	19.0106	18.8483	18.7726	18.6965	C8V089	ANIA_05814		+	-0.111097	2.06886	+	-0.220439	2.51202		biological regulation;cellular process;response to stimulus;signal transduction		TIP41	IPR007303	TIP41-like					PF04176	MM_CE	PD_CE	10	10	10	39.6	39.6	39.6	31.846		0	60.513	2689000000	24	0.0029063	-3.84253	0.00123877	-5.34528	C8V089
17.5593	17.717	17.7687	17.523	17.2837	17.2656	17.1469	17.2171	17.4971	17.7007	17.9541	C8V090	ANIA_05813		+	0.413669	3.08012	+	0.488967	2.07225	binding;ribonucleoprotein binding;ribosome binding	biological regulation;cellular component assembly;cellular component organization;cellular macromolecular complex assembly;cellular process;macromolecular complex assembly;protein complex assembly;protein complex biogenesis;regulation of organelle organization;regulation of translation		Ubiq_cyt_C_chap	IPR007129;IPR021150	Ubiq_cyt_c_chap/UPF0174;Ubiqinol_cyt_c_chaperone_CPB3					PF03981	MM_CE	PD_CE	6	6	6	15.4	15.4	15.4	39.828		0	15.079	425440000	10	0.00044357	6.17148	0.00341803	4.20271	C8V090
NaN	NaN	NaN	NaN	NaN	NaN	NaN	NaN	NaN	NaN	NaN	C8V095	ANIA_05809			0	NaN		0	NaN														1	1	1	4.6	4.6	4.6	26.724		0	71.75	0	2	1	NaN	1	NaN	C8V095
17.7333	17.774	17.612	17.7928	17.4667	17.5758	17.4597	17.3698	17.782	17.5497	17.7327	C8V097	ANIA_05807		+	0.260051	2.35966	+	0.220161	1.44408				MIT	IPR007330	MIT					PF04212	MM_CE	PD_CE	9	9	9	7.5	7.5	7.5	124.47		0	17.307	355590000	10	0.00183556	4.44155	0.0141328	2.84657	C8V097
15.3962	15.4832	15.6954	15.0255	14.4898	14.2664	14.4145	14.7202	14.9311	14.9525	15.0356	C8V099	ANIA_10738		+	0.927364	2.81716	+	0.500321	2.13176				4HBT	IPR003736;IPR006683;IPR029069	HotDog_dom;PAAI_dom;Thioestr_supf					PF03061	MM_CE	PD_CE	2	2	2	17.9	17.9	17.9	16.604		0	9.1336	200220000	1	0.000757511	5.49392	0.00293645	4.34656	C8V099
18.9834	18.9797	18.767	19.1727	18.943	18.9673	18.9803	18.9325	18.6726	18.668	18.4695	C8V0A0	ANIA_10732			0.0199409	0.0864841	+	-0.352424	2.77549	binding;lipid binding;phosphatidylinositol binding;phospholipid binding			Nexin_C;PX;PXA	IPR001683;IPR003114;IPR013937	Phox;Phox_assoc;Sorting_nexin_C	PS51207	PXA			PF00787;PF02194;PF08628		PD_CE	18	18	18	18.2	18.2	18.2	108.66		0	64.15	1747700000	23	0.716642	0.23849	0.000662848	-6.13001	C8V0A0
18.3419	18.4037	18.1403	18.3851	18.3121	18.2271	18.0623	18.2303	17.5177	17.7276	17.8037	C8V0A1	ANIA_05804			0.109779	0.658775	+	-0.524942	2.58198	binding;cation binding;ion binding;metal ion binding			DDHD	IPR004177	DDHD	PS51043	DDHD			PF02862		PD_CE	13	13	13	19.4	19.4	19.4	90.1		0	149.81	883640000	14	0.0950594	1.37117	0.00104361	-5.54563	C8V0A1
20.8831	20.8687	20.8092	21.1006	21.2186	21.2477	21.2247	21.2927	20.7767	20.8546	20.5232	C8V0A2	ANIA_05803		+	-0.330522	2.61553	+	-0.527747	2.77694	binding;calcium ion binding;cation binding;ion binding;metal ion binding	anatomical structure development;anatomical structure formation involved in morphogenesis;ascospore formation;biological regulation;cell development;cell differentiation;cell growth;cellular component assembly;cellular component organization;cellular localization;cellular process;cytoskeleton organization;developmental process;establishment or maintenance of cell polarity;growth;localization;orga…		CH	IPR001589;IPR001715;IPR002048;IPR011992	Actinin_actin-bd_CS;CH-domain;EF_hand_dom;EF-hand-dom_pair	PS00019;PS00020;PS50021	ACTININ_1;ACTININ_2;CH			PF00307	MM_CE	PD_CE	32	32	32	49.4	49.4	49.4	71.885		0	323.31	47251000000	91	0.00113229	-5.01183	0.000663391	-6.13456	C8V0A2
18.4881	18.5141	18.3851	18.0603	17.8381	17.816	17.7857	17.8801	18.035	18.0918	18.2106	C8V0A4	ANIA_05801		+	0.531929	2.61438	+	0.282491	2.64658	3'-phosphoadenosine 5'-phosphosulfate transmembrane transporter activity;nucleobase-containing compound transmembrane transporter activity;nucleoside transmembrane transporter activity;purine nucleoside transmembrane transporter activity;substrate-specific transmembrane transporter activity;substrate-specific transporter activity;transmembrane transporter activity;transporter activity			Mito_carr	IPR002067;IPR018108;IPR023395	Mit_carrier;Mitochondrial_sb/sol_carrier;Mt_carrier_dom	PS50920	SOLCAR			PF00153	MM_CE	PD_CE	9	9	9	22.7	22.7	22.7	38.444		0	72.463	1989000000	16	0.00113068	5.00916	0.000867176	5.73565	C8V0A4
14.8378	14.8362	14.6198	14.8676	14.8953	14.884	14.8255	14.7465	14.5758	14.7678	14.7537	C8V0A9	ANIA_10829	x		-0.047477	0.298397	+	-0.138746	1.05617	binding;catalytic activity;methyltransferase activity;nucleic acid binding;S-adenosylmethionine-dependent methyltransferase activity;transferase activity;transferase activity, transferring one-carbon groups	biological regulation;biosynthetic process;cellular metabolic process;cellular process;macromolecule metabolic process;metabolic process;regulation of translation;translational elongation			IPR002052;IPR029063	DNA_methylase_N6_adenine_CS;SAM-dependent_MTases	PS00092	N6_MTASE			PF05175		PD_CE	2	2	2	3.9	3.9	3.9	39.828		0.00082223	2.8543	52128000	2	0.310814	-0.71227	0.0407035	-2.11675	C8V0A9
17.6469	17.8049	17.889	17.6926	17.5969	17.6835	17.5903	17.7067	17.2265	17.3186	17.281	C8V0B1	ANIA_06488		+	0.114029	0.932247	+	-0.36895	3.51509	adenyl nucleotide binding;adenyl ribonucleotide binding;aminoacyl-tRNA ligase activity;ATP binding;binding;catalytic activity;ligase activity;ligase activity, forming aminoacyl-tRNA and related compounds;ligase activity, forming carbon-oxygen bonds;nucleotide binding;purine nucleotide binding;purine ribonucleoside triphosphate binding;purine ribonucleotide binding;ribonucleotide binding;tryptopha…	amine metabolic process;cellular amino acid metabolic process;cellular ketone metabolic process;cellular metabolic process;cellular nitrogen compound metabolic process;cellular process;macromolecule metabolic process;metabolic process;nitrogen compound metabolic process;nucleobase-containing compound metabolic process;organic acid metabolic process;primary metabolic process;RNA metabolic process;…		tRNA-synt_1b	IPR001412;IPR002305;IPR002306;IPR014729	aa-tRNA-synth_I_CS;aa-tRNA-synth_Ic;Rossmann-like_a/b/a_fold;Trp-tRNA-ligase	PS00178	AA_TRNA_LIGASE_I			PF00579	MM_CE	PD_CE	8	8	8	20.6	20.6	20.6	42.755		0	162.71	4102700000	12	0.0434304	1.83065	0.000238596	-8.85442	C8V0B1
19.5662	19.4445	19.6955	19.5604	19.6952	19.6996	19.7335	19.6166	19.459	19.3846	19.2946	C8V0B3	ANIA_06490		+	-0.119586	1.09458	+	-0.306848	2.80204	catalytic activity;hydrolase activity;hydrolase activity, acting on glycosyl bonds;hydrolase activity, hydrolyzing N-glycosyl compounds;inosine nucleosidase activity;nicotinamide riboside hydrolase activity;purine nucleosidase activity;purine-nucleoside phosphorylase activity;transferase activity;transferase activity, transferring glycosyl groups;transferase activity, transferring pentosyl groups	biosynthetic process;catabolic process;cellular metabolic compound salvage;cellular metabolic process;cellular nitrogen compound metabolic process;cellular process;cofactor metabolic process;heterocycle metabolic process;metabolic process;nitrogen compound metabolic process;nucleobase-containing compound catabolic process;nucleobase-containing compound metabolic process;nucleobase-containing smal…		PNP_UDP_1	IPR000845;IPR001369;IPR011268;IPR011270;IPR018099	Nucleoside_phosphorylase_d;PNP/MTAP;Pur_Nuc_Pase_Ino/Guo-sp;Purine_phosphorylase;Purine_phosphorylase-2_CS	PS01240	PNP_MTAP_2	Purine nucleoside phosphorylase		PF01048	MM_CE	PD_CE	16	16	16	41.6	41.6	41.6	34.641		0	68.211	8397600000	45	0.0279825	-2.10042	0.000655301	-6.21383	C8V0B3
16.3503	16.5669	16.1055	15.8487	16.1113	16.0692	15.9377	15.999	16.6783	16.6317	17.1683	C8V0B4	ANIA_06491			0.188566	0.549315	+	0.796829	2.49322		cellular metabolic process;cellular nitrogen compound metabolic process;cellular process;macromolecule metabolic process;metabolic process;nitrogen compound metabolic process;nucleobase-containing compound metabolic process;primary metabolic process;RNA metabolic process;RNA processing		Fcf2	IPR014810	Fcf2					PF08698		PD_CE	2	2	2	6.4	6.4	6.4	26.842		0.0092564	1.7772	89540000	2	0.133051	1.18102	0.00131307	5.2924	C8V0B4
19.0373	19.0706	18.8286	18.8785	18.6698	18.7353	18.7658	18.7275	18.4204	18.3405	18.2988	C8V0B5	ANIA_06492		+	0.229125	1.98032	+	-0.371391	3.71213	binding;DNA binding;nucleic acid binding;nucleic acid binding transcription factor activity;sequence-specific DNA binding;sequence-specific DNA binding transcription factor activity	biological regulation;biosynthetic process;cell communication;cellular component assembly;cellular component organization;cellular metabolic process;cellular nitrogen compound metabolic process;cellular process;chromatin organization;chromosome organization;macromolecule metabolic process;metabolic process;nitrogen compound metabolic process;nucleobase-containing compound metabolic process;organe…		CBFD_NFYB_HMF	IPR003958;IPR009072;IPR027170	CBFA_NFYB_domain;Histone-fold;NFYC/HAP5_su					PF00808	MM_CE	PD_CE	7	7	7	25.7	25.7	25.7	29.174		0	106.96	6112200000	35	0.00343238	3.66925	0.000138748	-9.73905	C8V0B5
18.4668	18.4097	18.5943	18.5114	18.2706	18.2922	18.26	18.3298	18.1881	18.1715	18.2869	C8V0B6	ANIA_06493		+	0.207386	2.5896	+	-0.0726856	1.02656		cellular process;establishment of localization;Golgi vesicle transport;membrane docking;transport;vesicle-mediated transport		Sec15	IPR007225	Sec15					PF04091	MM_CE	PD_CE	14	14	14	15	15	15	87.528		0	35.7	1571900000	16	0.0011959	4.952	0.0444503	-2.06304	C8V0B6
16.6933	16.6757	16.8454	16.5493	16.8031	16.7619	16.7424	16.8456	16.3752	16.5133	16.9704	C8V0B9	ANIA_06496			-0.0973411	0.735243		-0.168604	0.494313	catalytic activity;mannose-ethanolamine phosphotransferase activity;phosphotransferase activity, for other substituted phosphate groups;transferase activity;transferase activity, transferring phosphorus-containing groups	biosynthetic process;cellular lipid metabolic process;cellular metabolic process;cellular process;lipid metabolic process;macromolecule metabolic process;macromolecule modification;metabolic process;primary metabolic process;protein lipidation;protein metabolic process;protein modification process		Phosphodiest	IPR002591;IPR017849;IPR017850	Alkaline_Pase-like_a/b/a;Alkaline_phosphatase_core;Phosphodiest/P_Trfase					PF01663			3	3	3	3	3	3	94.346		0	5.1488	187620000	4	0.0753776	-1.50122	0.291655	-1.10267	C8V0B9
17.6305	17.5126	17.6941	17.3743	17.1401	17.151	17.0127	17.1211	17.3259	17.2934	17.4389	C8V0C1	ANIA_10822		+	0.44665	2.93199	+	0.246537	2.26491	acid-amino acid ligase activity;binding;catalytic activity;cation binding;ion binding;ligase activity;ligase activity, forming carbon-nitrogen bonds;metal ion binding;small conjugating protein ligase activity;SUMO ligase activity;transition metal ion binding;zinc ion binding	biological regulation;cellular metabolic process;cellular nitrogen compound metabolic process;cellular process;DNA metabolic process;DNA recombination;macromolecule metabolic process;macromolecule modification;metabolic process;nitrogen compound metabolic process;nucleobase-containing compound metabolic process;primary metabolic process;protein metabolic process;protein modification by small prot…		PINIT;SAP;zf-MIZ	IPR003034;IPR004181;IPR013083;IPR023321;IPR027229	PINIT;SAP_dom;SIZ1/SIZ2/Pli1/Gei17;Znf_MIZ;Znf_RING/FYVE/PHD	PS50800;PS51044;PS51466	PINIT;SAP;ZF_SP_RING			PF02037;PF02891;PF14324	MM_CE	PD_CE	11	11	11	27.2	27.2	27.2	55.876		0	31.02	513920000	11	0.000688273	5.78265	0.0020879	4.67999	C8V0C1
15.3731	15.4643	15.2978	15.1425	15.0844	14.9922	14.9174	14.8306	15.4185	15.4172	15.8369	C8V0F4	ANIA_10816		+	0.363292	2.23561	+	0.601372	2.19979				DUF4396	IPR025509	DUF4396					PF14342	MM_CE	PD_CE	2	2	2	8.4	8.4	8.4	24.757		0	4.7775	91315000	2	0.00216106	4.18009	0.00255867	4.51485	C8V0F4
16.6428	16.4868	16.483	16.3146	16.2335	16.2344	15.9641	16.0972	16.2355	16.2733	16.3616	C8V0H5	ANIA_10826		+	0.349502	2.02319		0.157869	0.941541		cellular component assembly;cellular component organization;cellular process;establishment of localization;Golgi vesicle transport;macromolecular complex assembly;protein complex assembly;transport;vesicle-mediated transport		TRAPP	IPR007194;IPR024096	NO_sig/Golgi_transp_ligand-bd;TRAPP_component					PF04051	MM_CE		4	4	4	22.5	22.5	22.5	21.119		0	28.163	510860000	6	0.00314812	3.75265	0.0568772	1.90985	C8V0H5
20.9323	20.6411	20.503	21.0152	20.6782	20.6565	20.6011	20.5499	20.0053	20.0932	20.1351	C8V0H6	ANIA_06499			0.151461	0.572692	+	-0.54356	4.0808	catalytic activity;L-malate dehydrogenase activity;malate dehydrogenase activity;oxidoreductase activity;oxidoreductase activity, acting on CH-OH group of donors;oxidoreductase activity, acting on the CH-OH group of donors, NAD or NADP as acceptor	carbohydrate metabolic process;cellular ketone metabolic process;cellular metabolic process;cellular process;metabolic process;organic acid metabolic process;primary metabolic process;small molecule metabolic process		Ldh_1_C;Ldh_1_N	IPR001236;IPR001557;IPR010097;IPR015955;IPR016040;IPR022383	Lactate/malate_DH_C;Lactate/malate_DH_N;Lactate_DH/Glyco_Ohase_4_C;L-lactate/malate_DH;Malate_DH_type1;NAD(P)-bd_dom					PF00056;PF02866		PD_CE	22	22	21	70.3	70.3	67	34.183		0	323.31	170850000000	76	0.123956	1.22212	6.53442e-05	-11.6157	C8V0H6
18.1587	18.1839	17.6912	18.2986	18.1733	17.8299	17.8163	17.3411	18.2092	17.8185	18.6412	C8V0H7	ANIA_06500			0.293006	0.645517		0.432873	0.72711	structural constituent of ribosome;structural molecule activity	biosynthetic process;cellular metabolic process;cellular process;macromolecule metabolic process;metabolic process;primary metabolic process;protein metabolic process;translation		Ribosomal_L28e	IPR002672;IPR029004	L28e/Mak16;Ribosomal_L28e					PF01778			17	17	17	70.1	70.1	70.1	17.086		0	92.841	2330800000	18	0.0988392	1.34842	0.117579	1.52633	C8V0H7
16.4566	16.2131	16.2434	16.498	16.6366	16.7397	16.6374	16.6405	15.9634	15.9502	16.0421	C8V0H8	ANIA_10827		+	-0.31076	2.16624	+	-0.678288	4.96853				DUF2015	IPR018559	DUF2015					PF09435	MM_CE	PD_CE	4	4	4	20.3	20.3	20.3	14.16		0	6.5982	888100000	5	0.00243409	-4.03782	0	-17.6359	C8V0H8
13.1635	13.2547	13.3184	12.7291	11.6786	11.9252	11.7028	11.7518	13.188	13.2552	13.2682	C8V0I0	ANIA_10828		+	1.3518	4.07851	+	1.47251	5.3758		cellular process;establishment of localization;protein targeting;protein transport;transmembrane transport;transport		Tom7	IPR012621	Tom7					PF08038	MM_CE	PD_CE	1	1	1	15.1	15.1	15.1	6.1391		0.0047855	2.1266	118520000	1	0.000169545	9.37745	0	21.3199	C8V0I0
16.0465	16.087	15.9602	15.7551	15.7099	15.8049	15.6275	15.7292	15.8345	16.0248	16.1359	C8V0I1	ANIA_10823		+	0.244365	1.6001	+	0.28058	1.66273	cofactor transporter activity;FAD transmembrane transporter activity;substrate-specific transmembrane transporter activity;substrate-specific transporter activity;transmembrane transporter activity;transporter activity			Mito_carr	IPR002067;IPR018108;IPR023395	Mit_carrier;Mitochondrial_sb/sol_carrier;Mt_carrier_dom	PS50920	SOLCAR			PF00153	MM_CE	PD_CE	4	4	4	11.3	11.3	11.3	34.351		0	7.5854	125980000	4	0.00805053	2.96521	0.00855689	3.28887	C8V0I1
20.4981	20.5267	20.6388	20.5745	20.5925	20.6153	20.6011	20.6216	20.1947	20.2283	20.1879	C8V0I4	ANIA_06505			-0.0481095	0.751705	+	-0.404034	6.18106	binding;lipid binding;phosphatidylinositol binding;phosphatidylinositol-3,5-bisphosphate binding;phospholipid binding;protein binding transcription factor activity;RNA polymerase II transcription factor binding transcription factor activity;RNA polymerase II transcription factor binding transcription factor activity involved in negative regulation of transcription;transcription factor binding tra…	anatomical structure development;biological regulation;biosynthetic process;cell communication;cellular aromatic compound metabolic process;cellular component assembly;cellular component organization;cellular metabolic process;cellular process;chromatin modification;chromatin organization;chromosome organization;developmental process;heterocycle metabolic process;metabolic process;organelle organ…		Tup_N;WD40	IPR001680;IPR013890;IPR015943;IPR017986;IPR019775;IPR020472	G-protein_beta_WD-40_rep;Tscrpt_rep_Tup1_N;WD40/YVTN_repeat-like_dom;WD40_repeat;WD40_repeat_CS;WD40_repeat_dom	PS00678;PS50082;PS50294	WD_REPEATS_1;WD_REPEATS_2;WD_REPEATS_REGION			PF00400;PF08581		PD_CE	24	24	24	40.2	40.2	40.2	62.947		0	147.21	25719000000	49	0.0719249	-1.529	0	-30.9674	C8V0I4
19.4985	19.5299	19.3183	19.6169	19.348	19.3987	19.3019	19.3407	19.1062	19.2573	18.9217	C8V0J1	ANIA_10824		+	0.143567	1.1429	+	-0.252249	1.51378	6-phosphofructo-2-kinase activity;adenyl nucleotide binding;adenyl ribonucleotide binding;ATP binding;binding;carbohydrate kinase activity;catalytic activity;kinase activity;nucleotide binding;phosphofructokinase activity;phosphotransferase activity, alcohol group as acceptor;purine nucleotide binding;purine ribonucleoside triphosphate binding;purine ribonucleotide binding;ribonucleotide binding;…	alcohol metabolic process;carbohydrate metabolic process;cellular metabolic process;cellular process;metabolic process;primary metabolic process;small molecule metabolic process		6PF2K;His_Phos_1	IPR003094;IPR013078;IPR013079;IPR027417;IPR029033	6Pfruct_kin;6Phosfructo_kin;His_Pase_superF_clade-1;His_PPase_superfam;P-loop_NTPase					PF00300;PF01591	MM_CE	PD_CE	15	15	15	28.8	28.8	28.8	63.989		0	52.668	3981100000	24	0.0241082	2.181	0.0118563	-2.98467	C8V0J1
18.6231	18.6054	18.614	18.5715	18.8142	18.7391	18.761	18.8461	18.581	18.6384	18.7695	C8V0J2	ANIA_10832		+	-0.186612	3.3498	+	-0.127142	1.16443		biological regulation;cellular metabolic process;cellular nitrogen compound metabolic process;cellular process;macromolecule metabolic process;macromolecule modification;metabolic process;nitrogen compound metabolic process;nucleobase-containing compound metabolic process;primary metabolic process;protein metabolic process;protein modification by small protein conjugation or removal;protein modif…		WD40	IPR001680;IPR015943;IPR017986;IPR020472	G-protein_beta_WD-40_rep;WD40/YVTN_repeat-like_dom;WD40_repeat;WD40_repeat_dom	PS50082;PS50294	WD_REPEATS_2;WD_REPEATS_REGION			PF00400	MM_CE	PD_CE	17	17	17	20.1	20.1	20.1	97.044		0	109.24	2000800000	24	0.00048053	-6.93087	0.0297384	-2.31498	C8V0J2
17.7687	17.7702	17.6698	17.6517	17.8763	17.5518	17.6835	17.7477	18.0163	18.105	18.4906	C8V0J3	ANIA_06512			0.000294209	0.00131367	+	0.489131	1.69563	adenyl nucleotide binding;adenyl ribonucleotide binding;ATP binding;ATPase activity;binding;catalytic activity;hydrolase activity;hydrolase activity, acting on acid anhydrides;hydrolase activity, acting on acid anhydrides, in phosphorus-containing anhydrides;nucleoside-triphosphatase activity;nucleotide binding;purine nucleotide binding;purine ribonucleoside triphosphate binding;purine ribonucleo…	biological regulation		ABC_tran	IPR003439;IPR003593;IPR027417	AAA+_ATPase;ABC_transporter-like;P-loop_NTPase	PS50893	ABC_TRANSPORTER_2			PF00005		PD_CE	11	11	11	47.1	47.1	47.1	30.427		0	116.41	1188400000	20	0.995271	0.00394567	0.007886	3.35789	C8V0J3
13.6309	13.7887	13.843	13.8913	15.4433	15.2689	15.8885	16.0739	14.8826	15.3374	14.2712	C8V0K0	ANIA_10833		+	-1.88019	4.13308	+	-0.838272	1.24222	carbon-nitrogen ligase activity, with glutamine as amido-N-donor;catalytic activity;ligase activity;ligase activity, forming carbon-nitrogen bonds			Amidase	IPR000120;IPR023631	Amidase;Amidase_dom					PF01425	MM_CE	PD_CE	2	2	2	4.4	4.4	4.4	60.544		0	4.5432	16007000	2	0.000178808	-9.58753	0.0240907	-2.4597	C8V0K0
14.191	14.0977	13.9704	14.0977	13.9303	14.1174	14.0751	14.1973	14.2278	14.1541	14.291	C8V0K1	ANIA_10825			0.00916505	0.0443766		0.144295	0.963472	active transmembrane transporter activity;amine transmembrane transporter activity;amino acid transmembrane transporter activity;carboxylic acid transmembrane transporter activity;organic acid transmembrane transporter activity;substrate-specific transmembrane transporter activity;substrate-specific transporter activity;transmembrane transporter activity;transporter activity			AA_permease_2	IPR002293	AA/rel_permease1					PF13520			1	1	1	1.5	1.5	1.5	65.547		0.0027402	2.4072	49265000	1	0.845024	0.127295	0.0535152	1.94925	C8V0K1
16.2647	16.291	16.0226	15.7741	15.6577	15.6782	15.5563	15.7437	16.5372	16.3579	16.6735	C8V0K2	ANIA_06520		+	0.429137	1.82865	+	0.863895	3.70055	catalytic activity;oxidoreductase activity	cellular component assembly;cellular component organization;cellular macromolecular complex assembly;cellular membrane organization;cellular metabolic process;cellular process;macromolecular complex assembly;macromolecule metabolic process;macromolecule modification;membrane organization;metabolic process;mitochondrion organization;organelle organization;primary metabolic process;protein complex …		FAD_binding_6	IPR001834;IPR008333;IPR017927;IPR017938	Fd_Rdtase_FAD-bd;NADH-Cyt_B5_reductase;OxRdtase_FAD-bd_dom;Riboflavin_synthase-like_b-brl	PS51384	FAD_FR			PF00175;PF00970	MM_CE	PD_CE	4	4	4	10.1	10.1	10.1	43.014		0	21.353	125230000	4	0.00492719	3.38114	0.000173333	9.68494	C8V0K2
17.7031	17.988	17.9762	17.2186	17.4216	17.2013	17.3589	17.2613	17.6934	17.5742	17.6824	C8V0K9	ANIA_06527		+	0.410716	1.15426	+	0.339212	2.42848				Suc_Fer-like	IPR009737;IPR012336	Suc_Fer-like;Thioredoxin-like_fold					PF06999	MM_CE	PD_CE	8	8	8	38	38	38	25.11		0	48.734	582860000	9	0.0233055	2.19998	0.00156295	5.11322	C8V0K9
19.3757	19.3673	19.3637	19.4158	19.4116	19.4478	19.427	19.4021	19.1763	19.2057	19.1665	C8V0L5	ANIA_06533		+	-0.0414934	1.42552	+	-0.239269	4.69935		cellular process;endosome transport;establishment of localization;establishment or maintenance of cell polarity;filamentous growth;Golgi vesicle transport;growth;hyphal growth;transport;vesicle-mediated transport		TRAPPC9-Trs120	IPR013935	TRAPP_II_complex_Trs120					PF08626	MM_CE	PD_CE	26	26	26	17.3	17.3	17.3	161.91		0	79.277	2392900000	36	0.0117902	-2.65971	0.00013494	-15.5496	C8V0L5
18.1703	18.2093	18.0412	17.8554	17.7461	17.7524	17.6701	17.7229	18.0636	17.9681	18.1016	C8V0M2	ANIA_06540		+	0.346154	2.25718	+	0.321577	3.32123		biological regulation;cellular component organization;cellular metabolic process;cellular nitrogen compound metabolic process;cellular process;cellular respiration;generation of precursor metabolites and energy;macromolecule metabolic process;metabolic process;mitochondrion organization;mRNA metabolic process;nitrogen compound metabolic process;nucleobase-containing compound metabolic process;org…		Pet127	IPR013943	Pet127					PF08634	MM_CE	PD_CE	12	12	12	17.6	17.6	17.6	83.388		0	24.478	436620000	15	0.00213037	4.22491	0.000251799	8.05515	C8V0M2
12.1583	12.0694	11.8734	12.0694	12.1478	12.1717	12.3607	12.3493	12.6304	12.3221	12.4294	C8V0M4	ANIA_06412		+	-0.214739	1.39024	+	0.203231	0.998208		cellular process;establishment of localization;transmembrane transport;transport		MFS_1	IPR011701;IPR020846	MFS;MFS_dom	PS50850	MFS			PF07690	MM_CE	PD_CE	2	2	2	6.1	6.1	6.1	38.726		0.00082454	2.909	21288000	2	0.0130999	-2.59903	0.0482465	2.01182	C8V0M4
14.469	14.593	16.2123	15.1242	14.2372	14.2177	14.1605	14.295	14.5554	14.5106	14.5502	C8V0M9	ANIA_06407		+	0.872031	1.14847	+	0.311131	3.5295	binding;catalytic activity;cation binding;heme binding;ion binding;iron ion binding;metal ion binding;monooxygenase activity;oxidoreductase activity;oxidoreductase activity, acting on paired donors, with incorporation or reduction of molecular oxygen;tetrapyrrole binding;transition metal ion binding			p450	IPR001128;IPR002403;IPR017972	Cyt_P450;Cyt_P450_CS;Cyt_P450_E_grp-IV	PS00086	CYTOCHROME_P450			PF00067	MM_CE	PD_CE	4	4	4	7.3	7.3	7.3	57.804		0	8.533	163680000	3	0.0236297	2.19031	0.000240964	8.91658	C8V0M9
15.8728	16.0366	16.6917	16.3057	16.2215	16.7137	16.514	16.3863	17.9897	16.8827	16.4483	C8V0N8	ANIA_06398			-0.232183	0.516332		0.648002	0.77241	binding;catalytic activity;coenzyme binding;cofactor binding			Epimerase	IPR001509;IPR016040	Epimerase_deHydtase_N;NAD(P)-bd_dom					PF01370			7	7	7	31.8	31.8	31.8	30.722		0	76.987	378810000	8	0.148421	-1.12248	0.100185	1.60737	C8V0N8
20.4586	20.4371	20.4184	20.2892	20.0745	19.9815	19.9071	19.9317	20.4864	20.4156	20.5754	C8V0S2	ANIA_06541		+	0.427114	3.70448	+	0.518779	3.52145	adenyl nucleotide binding;adenyl ribonucleotide binding;ATP binding;binding;catalytic activity;cation binding;cyclo-ligase activity;ion binding;ligase activity;ligase activity, forming carbon-nitrogen bonds;metal ion binding;nucleotide binding;phosphoribosylamine-glycine ligase activity;phosphoribosylformylglycinamidine cyclo-ligase activity;purine nucleotide binding;purine ribonucleoside triphos…	biosynthetic process;cellular aromatic compound metabolic process;cellular metabolic process;cellular nitrogen compound metabolic process;cellular process;heterocycle metabolic process;metabolic process;nitrogen compound metabolic process;nucleobase-containing compound metabolic process;nucleobase-containing small molecule metabolic process;nucleotide metabolic process;pigment metabolic process;p…		AIRS;AIRS_C;GARS_A;GARS_C;GARS_N	IPR000115;IPR000728;IPR004733;IPR010918;IPR011054;IPR011761;IPR013815;IPR013816;IPR016185;IPR016188;IPR020560;IPR020561;IPR020562	AIR_synth_C_dom;AIR_synth_N_dom;ATP_grasp_subdomain_1;ATP_grasp_subdomain_2;ATP-grasp;PreATP-grasp_dom;PRibGlycinamid_synth_ATP-grasp;PRibGlycinamide_synth;PRibGlycinamide_synth_C-dom;PRibGlycinamide_synth_N;PurM_cligase;PurM_N-like;Rudment_hybrid_motif	PS50975	ATP_GRASP			PF00586;PF01071;PF02769;PF02843;PF02844	MM_CE	PD_CE	26	26	26	33.9	33.9	33.9	85.726		0	264.2	14235000000	52	0.000318966	8.04314	0.000239944	8.88182	C8V0S2
12.4822	12.2964	12.1979	12.349	13.0549	13.0297	13.0622	12.9214	12.585	12.5044	12.2265	C8V0T5	ANIA_06552		+	-0.685667	4.2714	+	-0.578435	2.68769		catabolic process;cellular metabolic process;cellular process;macromolecule metabolic process;metabolic process;primary metabolic process;protein metabolic process;proteolysis;proteolysis involved in cellular protein catabolic process			IPR001810	F-box_dom	PS50181	FBOX				MM_CE	PD_CE	2	2	2	6.8	6.8	6.8	48.895		0	3.9339	13251000	2	7.88955e-05	-10.1391	0.000822196	-5.85919	C8V0T5
17.3159	17.1555	16.978	16.9678	16.7863	16.5642	16.6455	16.758	16.5892	16.4975	16.7081	C8V0T7	ANIA_06554		+	0.415814	2.27955		-0.090192	0.512291	binding;centromeric DNA binding;DNA binding;nucleic acid binding;sequence-specific DNA binding	cellular component organization;cellular localization;cellular process;chromosome organization;chromosome segregation;localization;organelle organization;plasmid maintenance		Histone	IPR000164;IPR007125;IPR009072	Histone_core_D;Histone_H3/CENP-A;Histone-fold	PS00959	HISTONE_H3_2			PF00125	MM_CE		6	5	5	36.6	33	33	20.498		0	37.708	797120000	8	0.00210372	4.27166	0.272238	-1.13614	C8V0T7
18.5153	18.5845	18.4349	18.2362	18.261	18.1969	18.1541	18.1327	18.5723	18.6774	18.7972	C8V0U7	ANIA_06564		+	0.256522	1.72411	+	0.496109	3.24828	structural constituent of ribosome;structural molecule activity	biosynthetic process;cellular metabolic process;cellular process;macromolecule metabolic process;metabolic process;primary metabolic process;protein metabolic process;translation		Ribosomal_S9	IPR000754;IPR014721;IPR020568;IPR020574	Ribosomal_S5_D2-typ_fold;Ribosomal_S5_D2-typ_fold_subgr;Ribosomal_S9;Ribosomal_S9_CS	PS00360	RIBOSOMAL_S9			PF00380	MM_CE	PD_CE	11	11	11	35.9	35.9	35.9	35.535		0	103.74	3367600000	19	0.00611368	3.18838	0.000331254	7.77127	C8V0U7
19.258	19.1629	18.8489	19.4809	19.2084	19.4632	19.1144	19.2287	18.9409	18.8798	18.6484	C8V0U9	ANIA_06566			-0.0660105	0.169709	+	-0.43065	1.87224	binding;calcium ion binding;calcium-dependent protein serine/threonine phosphatase regulator activity;cation binding;enzyme regulator activity;ion binding;metal ion binding;phosphatase regulator activity;protein phosphatase regulator activity	biological regulation;cell wall organization;cell wall organization or biogenesis;cellular cell wall organization;cellular cell wall organization or biogenesis;cellular component organization;cellular homeostasis;cellular ion homeostasis;cellular metabolic process;cellular process;external encapsulating structure organization;homeostatic process;metabolic process;phosphorus metabolic process;resp…		EF-hand_7	IPR002048;IPR011992;IPR018247	EF_Hand_1_Ca_BS;EF_hand_dom;EF-hand-dom_pair	PS00018;PS50222	EF_HAND_1;EF_HAND_2			PF13499		PD_CE	4	4	4	27.6	27.6	27.6	20.665		0	74.841	2603600000	12	0.510829	-0.438261	0.00528514	-3.74082	C8V0U9
18.3847	18.2981	18.3366	18.3229	18.5323	18.8405	18.6379	18.8648	18.1652	18.2413	18.0404	C8V0V3	ANIA_06570		+	-0.383306	2.45672	+	-0.569888	2.50617	adenyl nucleotide binding;adenyl ribonucleotide binding;AMP binding;ATP binding;binding;nucleotide binding;purine nucleotide binding;purine ribonucleoside triphosphate binding;purine ribonucleotide binding;ribonucleotide binding	biological regulation;cellular process;regulation of protein modification process;response to stimulus;signal transduction		AMPKBI	IPR006828;IPR014756;IPR030077	ASC_dom;Ig_E-set;SIP2/GAL83					PF04739;PF16561	MM_CE	PD_CE	13	13	13	44.9	44.9	44.9	49.123		0	255.49	1063300000	23	0.00153568	-4.65274	0.00127602	-5.3288	C8V0V3
19.8255	20.0391	19.8172	19.8155	20.0432	20.0643	20.0505	20.1305	19.8662	19.895	19.7082	C8V0V7	ANIA_06574		+	-0.197824	1.82998	+	-0.248985	2.2379	acid-amino acid ligase activity;binding;catalytic activity;DNA binding;DNA replication origin binding;ligase activity;ligase activity, forming carbon-nitrogen bonds;nucleic acid binding;sequence-specific DNA binding;small conjugating protein ligase activity;ubiquitin-protein ligase activity	biological regulation;biosynthetic process;cellular component organization;cellular metabolic process;cellular nitrogen compound metabolic process;cellular process;chromatin modification;chromatin organization;chromosome organization;DNA metabolic process;DNA recombination;DNA repair;gene silencing;histone modification;homeostatic process;macromolecule metabolic process;macromolecule modification…		BRE1	IPR013956	E3_ubiquit_lig_BRE1						MM_CE	PD_CE	24	24	24	35.1	35.1	35.1	78.615		0	135.54	1954000000	40	0.00492873	-3.3836	0.00235649	-4.61102	C8V0V7
17.8997	17.773	17.8585	18.2249	18.7839	18.818	18.7106	18.8144	17.1903	17.3499	17.1587	C8V0V9	ANIA_09529		+	-0.842724	3.77032	+	-1.54875	5.87552				DUF1183	IPR009567	DUF1183_TMEM66					PF06682	MM_CE	PD_CE	7	7	7	15	15	15	32.376		0	13.982	611220000	14	0.000294931	-8.26532	0	-26.8832	C8V0V9
17.4904	17.3644	17.3627	17.198	17.0427	17.099	17.0054	17.1057	17.1992	17.4378	17.3173	C8V0X4	ANIA_06365		+	0.290676	2.38838	+	0.254882	1.97331				DUF3605	IPR022036	DUF3605					PF12239	MM_CE	PD_CE	5	5	5	24.5	24.5	24.5	23.945		0	30.47	3032100000	13	0.00176403	4.50341	0.00415056	3.97022	C8V0X4
18.481	18.5525	18.3883	18.3774	18.2215	18.1475	18.2809	18.0747	18.1046	18.2061	18.079	C8V0Z6	ANIA_10801		+	0.268663	2.34376		-0.0512508	0.349811				RAI16-like	IPR019384	RetinoicA-induced_16-like					PF10257	MM_CE		15	15	15	18.5	18.5	18.5	93.284		0	110.48	879030000	20	0.00181571	4.40751	0.461088	-0.825101	C8V0Z6
18.8011	18.8675	18.8452	18.8347	18.6268	18.6358	18.6893	18.6683	18.6575	18.7095	18.584	C8V0Z7	ANIA_10809		+	0.182064	4.00402		-0.00469224	0.0465236	binding;chromatin binding;core promoter binding;DNA binding;nucleic acid binding;protein binding transcription factor activity;regulatory region DNA binding;regulatory region nucleic acid binding;RNA polymerase II basal transcription factor binding transcription factor activity;RNA polymerase II transcription factor binding transcription factor activity;sequence-specific DNA binding;TBP-class pro…	biological regulation		CBFD_NFYB_HMF	IPR003958;IPR009072	CBFA_NFYB_domain;Histone-fold					PF00808	MM_CE		9	9	9	38.6	38.6	38.6	28.136		0	58.058	2538500000	18	0.000157664	9.09726	0.924	-0.134287	C8V0Z7
20.8359	20.7116	20.4586	20.7634	20.586	20.6215	20.6072	20.5162	20.3178	20.1787	20.0166	C8V0Z9	ANIA_06341			0.109655	0.609596	+	-0.411676	2.4912		biological regulation;cellular component organization;cellular localization;cellular process;cytoskeleton organization;localization;organelle organization;regulation of organelle organization		DUF1899;DUF1900;WD40	IPR001680;IPR015048;IPR015049;IPR015505;IPR015943;IPR017986;IPR019775;IPR020472	Coronin;DUF1899;DUF1900;G-protein_beta_WD-40_rep;WD40/YVTN_repeat-like_dom;WD40_repeat;WD40_repeat_CS;WD40_repeat_dom	PS00678;PS50082;PS50294	WD_REPEATS_1;WD_REPEATS_2;WD_REPEATS_REGION	Coronin		PF00400;PF08953		PD_CE	31	31	31	55.6	55.6	55.6	66.509		0	323.31	21747000000	83	0.110469	1.28643	0.00131122	-5.28675	C8V0Z9
16.9188	16.5869	16.34	16.8029	16.3894	16.6031	16.5438	16.4848	15.9912	16.0891	16.2669	C8V104	ANIA_10800			0.15686	0.536515	+	-0.389532	2.19805	catalytic activity;kinase activity;phosphotransferase activity, alcohol group as acceptor;protein kinase activity;pyruvate dehydrogenase (acetyl-transferring) kinase activity;transferase activity;transferase activity, transferring phosphorus-containing groups	carbon utilization;cellular metabolic process;cellular process;macromolecule metabolic process;macromolecule modification;metabolic process;peptidyl-amino acid modification;phosphorus metabolic process;primary metabolic process;protein metabolic process;protein modification process;protein phosphorylation		BCDHK_Adom3;HATPase_c	IPR003594;IPR004358;IPR005467;IPR018955	BCDHK/PDK_N;HATPase_C;Sig_transdc_His_kinase_core;Sig_transdc_His_kin-like_C	PS50109	HIS_KIN			PF02518;PF10436		PD_CE	3	3	3	5.8	5.8	5.8	52.461		0	14.749	337920000	3	0.138767	1.15838	0.00258585	-4.5105	C8V104
17.8471	17.7488	17.9177	18.056	17.9901	18.1388	17.9746	17.8148	18.0574	18.2491	17.9296	C8V105	ANIA_10808			-0.0871644	0.417303		0.0991214	0.387047	binding;catalytic activity;cation binding;coenzyme binding;cofactor binding;ion binding;magnesium ion binding;metal ion binding;thiamine pyrophosphate binding;vitamin binding			TPP_enzyme_C;TPP_enzyme_M;TPP_enzyme_N	IPR011766;IPR012000;IPR012001;IPR029035;IPR029061	DHS-like_NAD/FAD-binding_dom;THDP-binding;Thiamin_PyroP_enz_cen_dom;Thiamin_PyroP_enz_TPP-bd_dom;TPP_enzyme-bd_C					PF00205;PF02775;PF02776			8	8	8	15.5	15.5	15.5	60.049		0	85.617	627700000	12	0.205063	-0.941997	0.415878	0.898372	C8V105
20.1605	20.2116	20.1983	20.0722	20.0878	20.1065	20.0106	20.0222	20.1261	20.2736	20.1621	C8V115	ANIA_10807		+	0.103879	1.41307	+	0.130476	1.42079	binding;nucleic acid binding;RNA binding			KH_1	IPR004087;IPR004088	KH_dom;KH_dom_type_1	PS50084	KH_TYPE_1			PF00013	MM_CE	PD_CE	33	33	33	34.1	34.1	34.1	111.48		0	155.3	5464700000	55	0.0121018	2.63826	0.0148805	2.80098	C8V115
18.0071	17.8478	18.078	17.9073	17.7454	17.8017	17.6551	17.6559	17.9779	17.9574	18.1514	C8V116	ANIA_10799		+	0.24553	2.10872	+	0.314338	2.27504												MM_CE	PD_CE	18	18	18	24.6	24.6	24.6	90.881		0	30.639	2454900000	19	0.00265016	3.92186	0.00201987	4.70603	C8V116
18.9582	18.6207	18.6531	19.6084	19.895	19.9047	19.8229	19.8686	18.7006	18.9498	18.7049	C8V130	ANIA_10841		+	-0.912679	2.13335	+	-1.08767	4.63064	catalytic activity			ECH	IPR001753;IPR029045	ClpP/crotonase-like_dom;Crotonase_core_superfam					PF00378	MM_CE	PD_CE	10	10	10	29.9	29.9	29.9	39.397		0	68.301	7203500000	23	0.00263033	-3.97128	0.000125	-15.0566	C8V130
19.1727	18.9943	18.6543	19.3849	19.0783	19.099	19.0291	18.9179	19.0501	19.0915	19.2852	C8V131	ANIA_10834			0.0205107	0.044756		0.111233	0.67876	acyl-CoA dehydrogenase activity;binding;catalytic activity;coenzyme binding;cofactor binding;flavin adenine dinucleotide binding;oxidoreductase activity;oxidoreductase activity, acting on the CH-CH group of donors			Acyl-CoA_dh_1;Acyl-CoA_dh_M;Acyl-CoA_dh_N	IPR006091;IPR009075;IPR009100;IPR013786	AcylCo_DH/oxidase_C;AcylCoA_DH/ox_N;AcylCoA_DH/oxidase_NM_dom;Acyl-CoA_Oxase/DH_cen-dom					PF00441;PF02770;PF02771			19	17	17	35.2	33.4	33.4	54.032		0	175.75	7280700000	37	0.843803	0.128334	0.141061	1.43958	C8V131
18.3774	18.4467	18.465	18.2531	18.138	18.0478	18.1074	18.1628	18.1123	18.1667	18.1615	C8V132	ANIA_06596		+	0.271535	2.62138		0.0328089	0.440993												MM_CE		15	15	15	20.8	20.8	20.8	87.552		0	61.399	1314000000	19	0.00113552	5.02539	0.351865	1.00221	C8V132
16.5094	16.6232	16.7408	16.5009	16.6225	16.4373	16.5334	16.5161	16.6631	16.5173	16.6632	C8V136	ANIA_06600			0.0662866	0.434745		0.087235	0.678476		cellular component assembly;cellular component organization;cellular localization;cellular macromolecular complex assembly;cellular process;chromosome organization;chromosome segregation;localization;macromolecular complex assembly;organelle organization		CENP-I	IPR012485	CENP-I					PF07778			7	7	7	10.1	10.1	10.1	83.857		0	16.959	276500000	9	0.193301	0.974381	0.141149	1.43907	C8V136
17.3636	17.427	17.4748	17.3897	17.5208	17.5914	17.6106	17.6708	17.7017	17.5881	17.5211	C8V139	ANIA_06603		+	-0.184632	2.48183		0.00525443	0.0313007				ASXH	IPR028020	ASXH					PF13919	MM_CE		9	9	9	25.3	25.3	25.3	53.192		0	84.737	422520000	10	0.00155711	-4.70839	0.947933	0.0917444	C8V139
16.0884	16.1376	16.3585	16.0366	15.8801	15.8332	15.8545	15.9029	16.1691	15.8868	16.2281	C8V141	ANIA_10835		+	0.287628	2.13356	+	0.226999	1.27659				DUF1777	IPR013957	DUF1777					PF08648	MM_CE	PD_CE	5	5	5	13.6	13.6	13.6	29.253		0	9.8545	275940000	4	0.00263128	3.97172	0.0219696	2.52434	C8V141
18.3954	18.2696	18.2507	18.3007	18.1502	18.1009	18.1207	18.1138	18.2319	17.9533	18.0426	C8V142	ANIA_10839		+	0.1827	2.78185		-0.0454836	0.264743	catalytic activity;oxidoreductase activity	cellular process;endosome transport;establishment of localization;transport;vesicle-mediated transport		DAO	IPR006076	FAD-dep_OxRdtase					PF01266	MM_CE		11	11	11	25.5	25.5	25.5	43.369		0	31.235	3188200000	18	0.000741986	5.40726	0.572329	-0.651342	C8V142
18.8481	18.936	18.9744	19.0618	18.867	18.7311	18.8995	18.6555	18.5276	18.6981	18.8962	C8V155	ANIA_06618		+	0.166799	1.2143		-0.0809566	0.299082		biological regulation;cellular process;establishment of localization;regulation of organelle organization;transport;vesicle-mediated transport		RabGAP-TBC	IPR000195	Rab-GTPase-TBC_dom	PS50086	TBC_RABGAP			PF00566	MM_CE		18	18	18	24.6	24.6	24.6	94.145		0	118.65	2793200000	29	0.0202968	2.30057	0.526517	-0.722691	C8V155
15.8212	15.7477	15.8196	15.7868	17.8471	18.3166	18.1964	17.2854	16.0683	16.1898	16.0844	C8V157	ANIA_10836		+	-2.1176	4.01381	+	-1.79722	2.8983	2 iron, 2 sulfur cluster binding;binding;catalytic activity;cation binding;dioxygenase activity;ion binding;iron ion binding;iron-sulfur cluster binding;metal cluster binding;metal ion binding;oxidoreductase activity;oxidoreductase activity, acting on paired donors, with incorporation or reduction of molecular oxygen;oxidoreductase activity, acting on paired donors, with incorporation or reductio…	catabolic process;cellular aromatic compound metabolic process;cellular metabolic process;cellular process;metabolic process		Rieske;Ring_hydroxyl_A	IPR001663;IPR015879;IPR017941	Rieske_2Fe-2S;Ring_hydroxy_dOase_asu_C_dom;Rng_hydr_dOase-A	PS51296	RIESKE			PF00355	MM_CE	PD_CE	7	7	7	16.8	16.8	16.8	47.49		0	12.753	323770000	7	0.000160237	-9.13367	0.000622936	-6.5256	C8V157
15.3413	15.3932	15.4563	15.1945	15.5099	15.3176	15.1706	15.4294	15.6546	15.8398	15.6927	C8V164	ANIA_06626			-0.0105693	0.039723	+	0.372145	1.87993				Mpv17_PMP22	IPR007248	Mpv17_PMP22					PF04117		PD_CE	1	1	1	5.2	5.2	5.2	23.512		0.00098425	2.8012	123680000	2	0.859599	-0.114479	0.00519697	3.75799	C8V164
19.76	19.9401	20.0397	19.7946	19.9661	19.9742	19.9678	20.0644	19.8323	20.0978	19.8381	C8V173	ANIA_06317			-0.109513	0.782571		-0.0703727	0.386112	actin binding;adenyl nucleotide binding;adenyl ribonucleotide binding;ATP binding;binding;catalytic activity;cation binding;cytoskeletal protein binding;DNA binding;heme binding;hydrolase activity;hydrolase activity, acting on acid anhydrides;hydrolase activity, acting on acid anhydrides, in phosphorus-containing anhydrides;ion binding;iron ion binding;metal ion binding;motor activity;nucleic aci…	anatomical structure formation involved in morphogenesis;anatomical structure morphogenesis;cell growth;cell morphogenesis;cell wall organization;cell wall organization or biogenesis;cellular cell wall organization;cellular cell wall organization or biogenesis;cellular component morphogenesis;cellular component organization;cellular process;developmental process;external encapsulating structure o…		Cyt-b5;DEK_C;Myosin_head	IPR001199;IPR001609;IPR004835;IPR009057;IPR014876;IPR027417;IPR029044	Chitin_synth;Cyt_B5-like_heme/steroid-bd;DEK_C;Homeodomain-like;Myosin_head_motor_dom;Nucleotide-diphossugar_trans;P-loop_NTPase					PF00063;PF00173;PF08766			35	35	35	22	22	22	193.69		0	313.52	6874900000	68	0.0659575	-1.58092	0.416959	-0.896549	C8V173
18.196	18.0926	18.2665	18.1172	18.0186	17.9632	17.9856	18.0869	17.7245	17.7998	17.9474	C8V178	ANIA_10806		+	0.15454	1.7463	+	-0.189664	1.51753				DUF155	IPR003734	DUF155					PF02582	MM_CE	PD_CE	12	12	12	24.9	24.9	24.9	57.628		0	62.642	1134900000	17	0.00585932	3.22891	0.011712	-2.99217	C8V178
16.0438	16.2739	15.9311	16.0094	16.0317	16.1123	16.1524	16.0552	16.5223	16.1526	16.7198	C8V179	ANIA_10798			-0.0233207	0.109783	+	0.377042	1.33775				U3_snoRNA_assoc	IPR013268	U3_snoRNA_assoc					PF08297		PD_CE	4	4	4	14.8	14.8	14.8	39.754		0	12.947	147210000	5	0.653968	-0.296786	0.0184111	2.64053	C8V179
18.786	18.8618	18.9182	18.3819	18.1259	18.1469	18.1534	18.1621	19.1694	19.1422	19.4712	C8V190	ANIA_06302		+	0.589935	2.5443	+	1.11386	4.24568	binding;nucleic acid binding;RNA binding;rRNA binding;structural constituent of ribosome;structural molecule activity	biosynthetic process;cellular component organization;cellular metabolic process;cellular process;macromolecule metabolic process;metabolic process;mitochondrial translation;mitochondrion organization;organelle organization;primary metabolic process;protein maturation;protein metabolic process;translation		Ribosomal_L16	IPR000114;IPR016180;IPR020798	Ribosomal_L10e/L16;Ribosomal_L16;Ribosomal_L16_CS	PS00701	RIBOSOMAL_L16_2			PF00252	MM_CE	PD_CE	10	10	10	30.5	30.5	30.5	27.433		0	23.72	1608500000	21	0.001401	4.84864	7.76699e-05	12.5599	C8V190
16.4889	16.6946	16.2958	16.2847	15.8868	15.8412	15.6851	16.0823	16.2417	16.3225	16.9353	C8V195	ANIA_06297		+	0.567175	2.377	+	0.62603	1.53201	binding;cation binding;copper ion binding;ion binding;metal ion binding;transition metal ion binding	cellular component assembly;cellular component organization;cellular metabolic process;cellular process;cellular respiration;generation of precursor metabolites and energy;macromolecular complex assembly;metabolic process;protein complex assembly		CtaG_Cox11	IPR007533;IPR023471	CtaG/Cox11_dom;Cyt_c_oxidase_assmbl_CtaG					PF04442	MM_CE	PD_CE	3	3	3	14.8	14.8	14.8	27.508		0	7.8485	233290000	4	0.00176668	4.47883	0.011281	3.02119	C8V195
17.3181	16.9364	16.6776	17.5178	17.3775	17.4402	17.2551	17.4658	16.2844	16.3906	16.5936	C8V199	ANIA_06293			-0.272156	0.675915	+	-0.961787	3.81298	binding;cation binding;DNA binding;ion binding;metal ion binding;nucleic acid binding;nucleic acid binding transcription factor activity;regulatory region DNA binding;regulatory region nucleic acid binding;RNA polymerase II regulatory region DNA binding;RNA polymerase II regulatory region sequence-specific DNA binding;sequence-specific DNA binding;sequence-specific DNA binding RNA polymerase II t…	biological regulation;carbon utilization		Zn_clus	IPR001138	Zn2-C6_fun-type_DNA-bd	PS00463;PS50048	ZN2_CY6_FUNGAL_1;ZN2_CY6_FUNGAL_2			PF00172		PD_CE	6	6	6	12.6	12.6	12.6	58.261		0	52.318	341640000	9	0.0903925	-1.40048	0.000151152	-10.2223	C8V199
18.7765	18.5512	18.6855	18.5885	18.8523	18.9402	18.9638	19.0129	18.6508	18.6116	18.6782	C8V1B0	ANIA_10797		+	-0.291868	2.52276	+	-0.295421	3.00332	catalytic activity			HMGL-like	IPR000891;IPR013785	Aldolase_TIM;PYR_CT	PS50991	PYR_CT			PF00682	MM_CE	PD_CE	9	9	8	23.5	23.5	21.5	37.572		0	67.329	6651300000	23	0.00147585	-4.79999	0.000503831	-6.88028	C8V1B0
13.5736	13.3241	13.6631	14.2907	14.7318	14.6226	14.6851	14.5801	13.8237	13.4966	13.4269	C8V1B2	ANIA_10805		+	-0.94204	2.39783	+	-1.07248	3.71965	catalytic activity;hydrolase activity			Abhydrolase_3	IPR013094;IPR029058	AB_hydrolase;AB_hydrolase_3					PF07859	MM_CE	PD_CE	3	3	3	3.8	3.8	3.8	88.838		0	5.716	47970000	3	0.00175197	-4.52389	0.000139693	-9.77436	C8V1B2
16.59	16.3997	16.6543	16.6153	16.9958	16.9147	16.7593	16.838	16.4938	16.4551	16.5358	C8V1C2	ANIA_10840		+	-0.312101	2.19934	+	-0.382037	2.75037	binding;catalytic activity;DNA binding;nucleic acid binding	cellular metabolic process;cellular nitrogen compound metabolic process;cellular process;DNA metabolic process;DNA repair;macromolecule metabolic process;metabolic process;nitrogen compound metabolic process;nucleobase-containing compound metabolic process;primary metabolic process;response to DNA damage stimulus;response to stimulus;response to stress		HhH-GPD	IPR003265;IPR003583;IPR011257;IPR023170	DNA_glycosylase;HhH-GPD_domain;Hlx-hairpin-Hlx_DNA-bd_motif;HTH_base_excis_C					PF00730	MM_CE	PD_CE	8	8	8	17.3	17.3	17.3	54.964		0	18.598	277700000	8	0.00224499	-4.10537	0.000733119	-6.05151	C8V1C2
19.6871	19.7697	19.4715	19.4777	18.9954	18.9019	18.8831	18.8566	19.7447	19.837	19.945	C8V1C3	ANIA_10837		+	0.692267	3.85105	+	0.932971	4.69294	amidophosphoribosyltransferase activity;catalytic activity;transferase activity;transferase activity, transferring glycosyl groups;transferase activity, transferring pentosyl groups	biosynthetic process;cellular aromatic compound metabolic process;cellular metabolic process;cellular nitrogen compound metabolic process;cellular process;heterocycle metabolic process;metabolic process;nitrogen compound metabolic process;nucleobase-containing compound metabolic process;nucleobase-containing small molecule metabolic process;nucleoside metabolic process;nucleotide metabolic proces…		GATase_2;Pribosyltran	IPR000583;IPR000836;IPR005854;IPR017932;IPR029055;IPR029057	GATase_2_dom;GATase_dom;Ntn_hydrolases_N;PRibTrfase_dom;PRTase-like;PurF	PS51278	GATASE_TYPE_2	Amidophosphoribosyltransferase		PF00156	MM_CE	PD_CE	20	20	20	30.8	30.8	30.8	63.997		0	71.216	3529200000	31	0.000241814	8.54488	0.000133652	15.5029	C8V1C3
21.3392	21.3736	21.2386	21.1722	20.7891	20.7768	20.6823	20.9273	21.1862	21.4225	20.9428	C8V1C5	ANIA_06639		+	0.487031	3.41286	+	0.389936	1.51712	2 iron, 2 sulfur cluster binding;2-methylcitrate dehydratase activity;binding;carbon-oxygen lyase activity;catalytic activity;hydro-lyase activity;iron-sulfur cluster binding;lyase activity;metal cluster binding	catabolic process;cellular ketone metabolic process;cellular metabolic process;cellular process;metabolic process;organic acid metabolic process;small molecule metabolic process		MmgE_PrpD	IPR005656;IPR012705	2Me_IsoCit_deHydtase_PrpD;MmgE_PrpD					PF03972	MM_CE	PD_CE	26	26	25	38.6	38.6	37.5	70.415		0	323.31	114570000000	112	0.000404494	7.11873	0.0117131	2.99134	C8V1C5
17.1629	17.0417	17.0653	17.1232	16.6421	16.753	16.6126	16.5571	17.2246	17.1112	17.6483	C8V1D1	ANIA_06645		+	0.45712	4.03746	+	0.686871	2.28472	binding;catalytic activity;cofactor binding;pyridoxal phosphate binding;vitamin B6 binding;vitamin binding	biosynthetic process;cellular amide metabolic process;cellular ketone metabolic process;cellular metabolic process;cellular nitrogen compound metabolic process;cellular process;cofactor metabolic process;heterocycle metabolic process;metabolic process;nitrogen compound metabolic process;organic acid metabolic process;small molecule metabolic process;sulfur compound metabolic process;vitamin metab…		Aminotran_1_2	IPR004839;IPR015421;IPR015422;IPR015424	Aminotransferase_I/II;PyrdxlP-dep_Trfase;PyrdxlP-dep_Trfase_major_sub1;PyrdxlP-dep_Trfase_major_sub2					PF00155	MM_CE	PD_CE	4	4	4	9	9	9	45.579		0	30.981	309370000	6	0.000163142	9.22212	0.00198202	4.73104	C8V1D1
19.1253	19.5386	19.3457	18.8547	18.7323	18.6352	18.7348	18.693	19.6762	19.6926	20.251	C8V1D8	ANIA_06651		+	0.517232	1.87776	+	1.17444	3.1273	adenyl nucleotide binding;adenyl ribonucleotide binding;ATP binding;ATPase activity;binding;catalytic activity;hydrolase activity;hydrolase activity, acting on acid anhydrides;hydrolase activity, acting on acid anhydrides, in phosphorus-containing anhydrides;nucleoside-triphosphatase activity;nucleotide binding;purine nucleotide binding;purine ribonucleoside triphosphate binding;purine ribonucleo…	cellular process;establishment of localization;nuclear transport;nucleobase-containing compound transport;nucleocytoplasmic transport;ribosomal small subunit biogenesis;transport		ABC_tran;Chromo	IPR000953;IPR003439;IPR003593;IPR011989;IPR016024;IPR016197;IPR017871;IPR023780;IPR027417	AAA+_ATPase;ABC_transporter_CS;ABC_transporter-like;ARM-like;ARM-type_fold;Chromo/shadow_dom;Chromo_domain;Chromodomain-like;P-loop_NTPase	PS00211;PS50893	ABC_TRANSPORTER_1;ABC_TRANSPORTER_2			PF00005;PF00385	MM_CE	PD_CE	35	35	34	34.1	34.1	32.7	122.69		0	142.38	2416700000	41	0.00444657	3.47327	0.000373306	7.31965	C8V1D8
19.3266	19.3567	19.2762	19.4272	19.4152	19.4974	19.4787	19.5289	19.3125	19.2113	19.057	C8V1G2	ANIA_06280		+	-0.133395	1.82051	+	-0.286438	2.06791				Rxt3	IPR004043;IPR013951	Histone_deAc_Rxt3;LCCL					PF08642	MM_CE	PD_CE	28	28	28	31.3	31.3	31.3	100.14		0	172.23	2591200000	38	0.00496278	-3.36595	0.00346612	-4.19234	C8V1G2
20.9627	19.8534	20.0917	20.3754	20.0862	20.0887	20.0007	19.9433	20.0703	19.9902	20.045	C8V1G3	ANIA_06279			0.291083	0.562588		0.00542212	0.0403642	acetyltransferase activity;carnitine O-acetyltransferase activity;carnitine O-acyltransferase activity;catalytic activity;O-acetyltransferase activity;O-acyltransferase activity;transferase activity;transferase activity, transferring acyl groups;transferase activity, transferring acyl groups other than amino-acyl groups	amine metabolic process;carbon utilization;catabolic process;cellular amino acid metabolic process;cellular ketone metabolic process;cellular lipid metabolic process;cellular metabolic process;cellular nitrogen compound metabolic process;cellular process;lipid metabolic process;metabolic process;nitrogen compound metabolic process;organic acid metabolic process;primary metabolic process;small mol…		Carn_acyltransf	IPR000542	Carn_acyl_trans	PS00440	ACYLTRANSF_C_2			PF00755			33	33	33	46.3	46.3	46.3	72.835		0	315.69	16698000000	70	0.127884	1.20439	0.932727	0.117223	C8V1G3
17.7247	17.5458	18.9248	17.2838	19.2094	19.1152	19.0326	19.0054	17.9489	18.0782	17.7941	C8V1G5	ANIA_06277		+	-1.22088	1.80415	+	-1.15027	4.33915		cellular process;establishment of localization;transmembrane transport;transport		MFS_1	IPR011701;IPR020846	MFS;MFS_dom	PS50850	MFS			PF07690	MM_CE	PD_CE	15	15	15	22.2	22.2	22.2	67.583		0	143.75	3697000000	27	0.00509628	-3.33555	8.62866e-05	-13.127	C8V1G5
17.6281	17.9731	17.5591	17.6824	17.5847	17.5961	17.5417	17.5562	17.3959	17.3929	17.5813	C8V1H8	ANIA_06264			0.140989	0.754787	+	-0.112946	1.03818		biological regulation		LIM_bind	IPR029005	LIM-bd/SEUSS					PF01803		PD_CE	6	6	6	20.5	20.5	20.5	39.193		0	30.275	1025100000	13	0.0712725	1.5342	0.0429942	-2.08409	C8V1H8
NaN	NaN	NaN	NaN	NaN	NaN	NaN	NaN	NaN	NaN	NaN	C8V1I8	ANIA_10803			0	NaN		0	NaN				B12D	IPR010530	B12D								3	3	3	26.8	26.8	26.8	9.1597		0	49.355	0	0	1	NaN	1	NaN	C8V1I8
17.3616	17.187	17.2948	17.0753	16.6731	16.7236	16.667	16.5719	17.4414	17.3313	17.3116	C8V1I9	ANIA_06255		+	0.570773	3.72673	+	0.702528	4.46438	catalytic activity;cation transmembrane transporter activity;cytochrome-c oxidase activity;heme-copper terminal oxidase activity;hydrogen ion transmembrane transporter activity;inorganic cation transmembrane transporter activity;ion transmembrane transporter activity;monovalent inorganic cation transmembrane transporter activity;oxidoreductase activity;oxidoreductase activity, acting on a heme gr…	cellular component assembly;cellular component organization;cellular macromolecular complex assembly;cellular process;macromolecular complex assembly;protein complex assembly;protein complex biogenesis		COX6B	IPR003213	Cyt_c_oxidase_su6B					PF02297	MM_CE	PD_CE	2	2	2	19	19	19	10.055		0	5.2147	4741600000	6	0.000281938	8.11765	0.000101083	13.925	C8V1I9
19.294	19.3868	19.1814	19.0787	18.6564	18.6133	18.6454	18.6899	19.3753	19.3369	19.7196	C8V1J1	ANIA_06253		+	0.583977	3.83477	+	0.826028	3.30211	adenyl nucleotide binding;adenyl ribonucleotide binding;aminoacyl-tRNA ligase activity;ATP binding;binding;catalytic activity;cation binding;ion binding;ligase activity;ligase activity, forming aminoacyl-tRNA and related compounds;ligase activity, forming carbon-oxygen bonds;magnesium ion binding;metal ion binding;nucleic acid binding;nucleotide binding;phenylalanine-tRNA ligase activity;purine n…	amine metabolic process;cellular amino acid metabolic process;cellular ketone metabolic process;cellular metabolic process;cellular nitrogen compound metabolic process;cellular process;macromolecule metabolic process;metabolic process;nitrogen compound metabolic process;nucleobase-containing compound metabolic process;organic acid metabolic process;primary metabolic process;RNA metabolic process;…		FDX-ACB;tRNA-synt_2d	IPR002319;IPR004530;IPR005121;IPR006195	aa-tRNA-synth_II;Phenylalanyl-tRNA_Synthase;PheS_beta_Fdx_antiC-bd;Phe-tRNA-synth_IIc_mito	PS50862;PS51447	AA_TRNA_LIGASE_II;FDX_ACB			PF01409;PF03147	MM_CE	PD_CE	16	16	16	33.7	33.7	33.7	58.532		0	189.84	1994900000	27	0.00031644	8.48783	0.000326821	7.97988	C8V1J1
18.8033	18.6847	18.8058	18.5314	18.4608	18.3296	18.3835	18.4411	18.3646	18.3462	18.5498	C8V1J4	ANIA_06250		+	0.302561	2.26733		0.0164584	0.0918055	arginyltransferase activity;catalytic activity;transferase activity;transferase activity, transferring acyl groups;transferase activity, transferring amino-acyl groups	cellular metabolic process;cellular process;macromolecule metabolic process;macromolecule modification;metabolic process;primary metabolic process;protein metabolic process;protein modification process		ATE_C;ATE_N	IPR007471;IPR007472;IPR016181;IPR030700	Acyl_CoA_acyltransferase;Arg_tRNA_PTrfase_N;Arg-tRNA_Trfase;Arg-tRNA-P_Trfase_C					PF04376;PF04377	MM_CE		7	7	7	14.3	14.3	14.3	49.943		0	15.95	809560000	11	0.00211321	4.24609	0.85093	0.254208	C8V1J4
16.973	16.9523	16.9723	16.7611	15.998	15.9656	15.9167	15.7449	16.4545	16.8281	16.7248	C8V1J5	ANIA_06249		+	1.00839	4.93726	+	0.762811	2.93803	calcium-dependent protein serine/threonine phosphatase regulator activity;enzyme regulator activity;phosphatase regulator activity;protein phosphatase regulator activity	biological regulation;cellular process;response to stimulus;signal transduction		Calcipressin	IPR006931	Calcipressin					PF04847	MM_CE	PD_CE	2	2	2	5.3	5.3	5.3	33.244		0.001147	2.7751	220180000	4	0	13.2235	0.000615949	6.65795	C8V1J5
16.0117	16.223	15.9078	16.1464	16.2044	16.2176	16.2063	16.2972	16.7485	16.2823	16.2486	C8V1J8	ANIA_06247		+	-0.159131	1.13343		0.195128	0.667493												MM_CE		4	4	4	7.1	7.1	7.1	68.928		0	8.8383	175370000	4	0.0248182	-2.1652	0.147327	1.4193	C8V1J8
17.6969	17.8635	17.7285	17.4249	17.1908	17.0946	17.1729	17.2126	17.9217	17.9623	18.1549	C8V1K0	ANIA_06245		+	0.510749	2.75878	+	0.845255	4.24188												MM_CE	PD_CE	7	7	7	29.6	29.6	29.6	29.453		0	56.149	1066500000	15	0.000819401	5.35117	7.7135e-05	12.5374	C8V1K0
16.1892	16.1639	16.1412	16.2261	15.4386	15.4372	15.7064	15.5682	15.7274	15.7169	15.6412	C8V1L2	ANIA_06677		+	0.642529	4.14698	+	0.157573	0.986167				Dpy-30	IPR007858	Dpy-30_motif					PF05186	MM_CE	PD_CE	2	2	2	14.6	14.6	14.6	15.877		0	5.6483	201100000	2	0.000182432	9.64171	0.0499581	1.9901	C8V1L2
19.9663	20.0023	19.9372	19.9287	19.7702	19.945	19.7353	19.7521	20.0502	20.1522	20.198	C8V1L4	ANIA_06679		+	0.157992	1.66043	+	0.332824	2.34227	binding;nucleic acid binding;RNA binding;rRNA binding;SSU rRNA binding;structural constituent of ribosome;structural molecule activity	biosynthetic process;cellular metabolic process;cellular nitrogen compound metabolic process;cellular process;macromolecule metabolic process;metabolic process;nitrogen compound metabolic process;nucleobase-containing compound metabolic process;primary metabolic process;protein metabolic process;RNA metabolic process;RNA processing;rRNA processing;translation		Ribosomal_S13_N;Ribosomal_S15	IPR000589;IPR009068;IPR012606;IPR023029	Ribosomal_S13/S15_N;Ribosomal_S15;Ribosomal_S15P;S15_NS1_RNA-bd	PS00362	RIBOSOMAL_S15			PF00312;PF08069	MM_CE	PD_CE	11	11	11	65.6	65.6	65.6	16.843		0	66.479	27385000000	34	0.00700115	3.07306	0.00184121	4.8815	C8V1L4
18.7109	18.7649	18.6286	18.5536	18.6246	18.533	18.5875	18.5736	18.6544	18.4493	18.6758	C8V1L6	ANIA_06681			0.0848327	0.849811		0.0135264	0.0746887	binding;nucleic acid binding;nucleotide binding;pre-mRNA binding;pre-mRNA branch point binding;RNA binding	cellular component assembly;cellular component organization;cellular macromolecular complex assembly;cellular metabolic process;cellular nitrogen compound metabolic process;cellular process;macromolecular complex assembly;macromolecule metabolic process;metabolic process;mRNA metabolic process;mRNA processing;nitrogen compound metabolic process;nucleobase-containing compound metabolic process;pri…		RRM_1	IPR000504;IPR006529;IPR012677	Nucleotide-bd_a/b_plait;RRM_dom;U2AF_lg	PS50102	RRM			PF00076			19	19	19	28.7	28.7	28.7	61.737		0	225.17	4177900000	28	0.0545254	1.69343	0.878674	0.209944	C8V1L6
14.2907	14.2707	14.4202	14.5248	14.4718	14.3733	14.2537	14.3915	14.1208	13.9878	14.2566	C8V1L9	ANIA_06684			0.00406027	0.0184699	+	-0.250822	1.51506	binding;cation binding;ion binding;metal ion binding;nucleic acid binding transcription factor activity;sequence-specific DNA binding RNA polymerase II transcription factor activity;sequence-specific DNA binding transcription factor activity;transition metal ion binding;zinc ion binding			Fungal_trans_2;Zn_clus	IPR001138;IPR021858	DUF3468;Zn2-C6_fun-type_DNA-bd	PS50048	ZN2_CY6_FUNGAL_2			PF00172;PF11951		PD_CE	4	4	4	4.8	4.8	4.8	82.956		0.00050633	3.6125	39725000	4	0.933345	0.0544255	0.0118257	-2.98721	C8V1L9
21.2655	21.2478	21.0409	21.1632	20.7236	20.6071	20.6124	20.5827	20.7597	20.6466	20.727	C8V1M3	ANIA_06688		+	0.547897	4.00883		0.0796064	0.829197	1-phosphatidylinositol binding;binding;GTP binding;guanyl nucleotide binding;guanyl ribonucleotide binding;lipid binding;nucleotide binding;phosphatidylinositol binding;phosphatidylinositol-4-phosphate binding;phosphatidylinositol-5-phosphate binding;phospholipid binding;purine nucleotide binding;purine ribonucleoside triphosphate binding;purine ribonucleotide binding;ribonucleotide binding;struc…	anatomical structure development;cellular component assembly;cellular component disassembly;cellular component organization;cellular localization;cellular macromolecular complex assembly;cellular process;cytokinesis;developmental process;filamentous growth;growth;hyphal growth;localization;macromolecular complex assembly;protein complex assembly		Septin	IPR016491;IPR027417;IPR030379	G_SEPTIN_dom;P-loop_NTPase;Septin	PS51719	G_SEPTIN			PF00735	MM_CE		33	33	32	63.2	63.2	61.2	52.028		0	323.31	78092000000	87	0.00015859	9.11513	0.0824072	1.70881	C8V1M3
19.7421	19.6635	19.528	19.5777	19.5714	19.7958	19.6876	19.9695	19.3853	19.3903	19.2285	C8V1N6	ANIA_06699			-0.12819	0.630445	+	-0.42135	1.91908	binding;coenzyme binding;cofactor binding;electron carrier activity;flavin adenine dinucleotide binding			ETF;ETF_alpha	IPR001308;IPR014729;IPR014730;IPR014731;IPR029035	DHS-like_NAD/FAD-binding_dom;ETF_a;ETF_a/b_N;ETF_asu_C;Rossmann-like_a/b/a_fold					PF00766;PF01012		PD_CE	13	13	13	42.4	42.4	42.4	36.389		0	213.05	18494000000	31	0.103171	-1.32247	0.0048304	-3.84615	C8V1N6
20.7634	21.7348	21.5513	20.2783	20.9023	20.8735	20.8687	20.8547	21.8051	21.7006	22.195	C8V1N7	ANIA_06700			0.207137	0.247352	+	1.02542	3.33501	adenyl nucleotide binding;adenyl ribonucleotide binding;ATP binding;ATPase activity;binding;catalytic activity;hydrolase activity;hydrolase activity, acting on acid anhydrides;hydrolase activity, acting on acid anhydrides, in phosphorus-containing anhydrides;nucleoside-triphosphatase activity;nucleotide binding;purine nucleotide binding;purine ribonucleoside triphosphate binding;purine ribonucleo…			ABC_tran	IPR003439;IPR003593;IPR011989;IPR015688;IPR016024;IPR017871;IPR027417	AAA+_ATPase;ABC_transporter_CS;ABC_transporter-like;ARM-like;ARM-type_fold;Elongation_fac_3;P-loop_NTPase	PS00211;PS50893	ABC_TRANSPORTER_1;ABC_TRANSPORTER_2			PF00005;PF17947		PD_CE	45	45	45	42.1	42.1	42.1	102.21		0	261.02	35158000000	116	0.375767	0.607509	0.000254545	8.10976	C8V1N7
10.8706	10.6246	10.9261	11.145	10.8709	10.7534	10.6247	11.0817	9.66436	10.393	10.7089	C8V1N8	ANIA_06701			0.0589149	0.156533	+	-0.577232	1.01327													PD_CE	1	1	1	6.5	6.5	6.5	24.406		0.00050599	3.5918	11286000	1	0.539158	0.408083	0.0462065	-2.03901	C8V1N8
19.1429	19.1955	19.2907	19.0725	18.6484	18.7291	18.6206	18.5875	18.6661	18.7753	18.6875	C8V1P8	ANIA_06710		+	0.529015	4.14027		0.0632806	0.653189	catalytic activity;ferrochelatase activity;lyase activity;oxidoreductase activity;oxidoreductase activity, acting on the CH-CH group of donors;oxidoreductase activity, acting on the CH-CH group of donors, NAD or NADP as acceptor;precorrin-2 dehydrogenase activity	biosynthetic process;cellular metabolic process;cellular nitrogen compound metabolic process;cellular process;cofactor metabolic process;heterocycle metabolic process;metabolic process;nitrogen compound metabolic process;pigment metabolic process;sulfur compound metabolic process		NAD_binding_7;Sirohm_synth_C;Sirohm_synth_M	IPR006367;IPR016040;IPR028161;IPR028162;IPR028281	Met8;Met8_C;NAD(P)-bd_dom;Sirohaem_synthase_central;Sirohaem_synthase_N					PF14823;PF14824	MM_CE		6	6	6	32.6	32.6	32.6	26.385		0	27.872	1979700000	17	0.000180602	9.61554	0.155853	1.39352	C8V1P8
19.0381	19.0254	18.8905	18.9504	19.0847	19.0863	19.0268	19.0153	18.8443	18.9154	18.7905	C8V1P9	ANIA_06711		+	-0.0771532	1.01304	+	-0.203164	2.53651	binding;catalytic activity;cation binding;diphosphotransferase activity;ion binding;magnesium ion binding;metal ion binding;ribose phosphate diphosphokinase activity;transferase activity;transferase activity, transferring phosphorus-containing groups	alcohol metabolic process;biosynthetic process;carbohydrate metabolic process;cell wall organization;cell wall organization or biogenesis;cellular cell wall organization;cellular cell wall organization or biogenesis;cellular component organization;cellular metabolic process;cellular nitrogen compound metabolic process;cellular process;external encapsulating structure organization;heterocycle meta…		Pribosyl_synth;Pribosyltran_N	IPR000842;IPR005946;IPR029057;IPR029099	PRib_PP_synth_CS;Pribosyltran_N;PRTase-like;Rib-P_diPkinase	PS00114	PRPP_SYNTHASE			PF13793;PF14572	MM_CE	PD_CE	15	15	15	30.9	30.9	30.9	53.204		0	152.78	5753800000	26	0.0352145	-1.96484	0.00116414	-5.4148	C8V1P9
20.2623	20.1	20.3254	20.3765	20.2637	20.1726	20.1742	20.2815	19.9123	19.9426	19.9196	C8V1Q0	ANIA_06712			0.043025	0.265637	+	-0.298172	3.436	catalytic activity;hydrolase activity;hydrolase activity, acting on ester bonds;lipase activity;phospholipase activity;phospholipase D activity;phosphoric diester hydrolase activity;phosphoric ester hydrolase activity	cellular lipid metabolic process;cellular metabolic process;cellular process;lipid metabolic process;metabolic process;primary metabolic process		PLDc	IPR001736;IPR015679	PLipase_D/transphosphatidylase;PLipase_D_fam	PS50035	PLD			PF00614		PD_CE	25	25	25	26.3	26.3	26.3	95.733		0	142.11	6923200000	48	0.351257	0.645551	0.000222805	-8.52021	C8V1Q0
16.6745	16.723	16.6331	16.6347	17.2721	17.194	17.2696	17.2952	17.1708	17.0537	17.0748	C8V1Q1	ANIA_06713	x	+	-0.591411	5.9097	+	-0.157959	1.97142		cellular metabolic process;cellular nitrogen compound metabolic process;cellular process;macromolecule metabolic process;macromolecule modification;metabolic process;nitrogen compound metabolic process;nucleobase-containing compound metabolic process;one-carbon metabolic process;primary metabolic process;RNA metabolic process;RNA modification;RNA processing;rRNA processing;small molecule metaboli…		Methyltransf_10	IPR010286;IPR029063	rRNA_lsu_MeTfrase_F-like;SAM-dependent_MTases					PF05971	MM_CE	PD_CE	7	7	7	17.3	17.3	17.3	48.579		0	18.458	297940000	7	0	-19.3559	0.00415372	-3.96586	C8V1Q1
19.0349	19.1886	18.9267	19.0056	18.9019	18.951	18.8813	18.9119	19.1206	19.2852	19.2617	C8V1Q2	ANIA_06714		+	0.127445	1.18132	+	0.311008	2.95359		cell wall organization;cell wall organization or biogenesis;cellular cell wall organization;cellular cell wall organization or biogenesis;cellular component organization;cellular process;external encapsulating structure organization			IPR011990;IPR013026;IPR019734	TPR_repeat;TPR-contain_dom;TPR-like_helical_dom	PS50005;PS50293	TPR;TPR_REGION				MM_CE	PD_CE	22	22	22	26.5	26.5	26.5	110.47		0	191.88	1794100000	34	0.0218838	2.24527	0.000573543	6.71038	C8V1Q2
15.1963	15.5434	15.3946	15.0595	15.2726	15.2864	15.1409	15.1726	15.9086	16.1454	15.6687	C8V1R3	medA			0.0803256	0.29859	+	0.689418	2.60527		anatomical structure formation involved in morphogenesis;biological regulation;developmental process;reproduction;sporulation											PD_CE	2	2	2	2.6	2.6	2.6	71.613		0.00050787	3.7123	54613000	2	0.310659	0.712658	0.000949457	5.61358	C8V1R3
NaN	NaN	NaN	NaN	NaN	NaN	NaN	NaN	NaN	NaN	NaN	C8V1R4	ANIA_10796			0	NaN		0	NaN														1	1	1	3.2	3.2	3.2	28.955	+	1	-2	0	0	1	NaN	1	NaN	C8V1R4
18.2457	18.0522	18.0651	18.6605	19.4091	19.56	19.5424	19.8229	18.8935	18.6736	18.8662	C8V1R5	ANIA_10793		+	-1.32774	3.68762	+	-0.7725	2.91024	binding;catalytic activity;cation binding;ion binding;metal ion binding;oxidoreductase activity;transition metal ion binding;zinc ion binding			ADH_N;ADH_zinc_N	IPR002085;IPR011032;IPR013149;IPR013154;IPR016040	ADH_C;ADH_GroES-like;ADH_SF_Zn-type;GroES-like;NAD(P)-bd_dom					PF00107;PF08240	MM_CE	PD_CE	12	12	12	30.1	30.1	30.1	38.842		0	64.448	2506300000	23	0.000314894	-7.98709	0.000626571	-6.56513	C8V1R5
18.0802	18.167	18.167	18.3527	18.1672	18.2712	18.2118	18.018	18.4152	18.3628	18.1524	C8V1R8	ANIA_10795			0.024662	0.116305		0.143092	0.736265	catalytic activity;hydrolase activity;hydrolase activity, acting on carbon-nitrogen (but not peptide) bonds			Amidohydro_3	IPR011059;IPR013108	Amidohydro_3;Metal-dep_hydrolase_composite					PF07969			9	9	9	14.4	14.4	14.4	59.646		0	41.906	2213600000	12	0.636371	0.312746	0.113755	1.54273	C8V1R8
16.6946	16.5637	16.6084	16.7496	16.6952	16.7163	16.838	16.7937	15.8536	16.1113	15.9234	C8V1R9	ANIA_10792		+	-0.106706	1.03072	+	-0.798028	3.88316	binding;cation binding;ion binding;metal ion binding;transition metal ion binding;zinc ion binding			zf-RING_2	IPR001841;IPR013083	Znf_RING;Znf_RING/FYVE/PHD	PS50089	ZF_RING_2			PF13639	MM_CE	PD_CE	8	8	8	26.2	26.2	26.2	47.103		0	41.976	372180000	8	0.0334531	-1.9942	0.000160156	-10.5716	C8V1R9
18.5434	18.5016	18.532	18.5838	18.5704	18.5981	18.5304	18.5664	18.1915	18.2997	18.1243	C8V1S3	ANIA_10794			-0.0261335	0.554319	+	-0.361138	3.27756	adenyl nucleotide binding;adenyl ribonucleotide binding;ATP binding;binding;catalytic activity;cation binding;DNA binding;hydrolase activity;hydrolase activity, acting on acid anhydrides;hydrolase activity, acting on acid anhydrides, in phosphorus-containing anhydrides;ion binding;metal ion binding;nucleic acid binding;nucleotide binding;purine nucleotide binding;purine ribonucleoside triphosphat…			Helicase_C;HIRAN;SNF2_N	IPR000330;IPR001650;IPR014001;IPR014905;IPR027417	Helicase_ATP-bd;Helicase_C;HIRAN;P-loop_NTPase;SNF2_N	PS51192;PS51194	HELICASE_ATP_BIND_1;HELICASE_CTER			PF00176;PF00271;PF08797		PD_CE	17	17	17	13.9	13.9	13.9	129.43		0	57.095	504070000	21	0.131209	-1.18985	0.000319629	-7.88417	C8V1S3
17.8151	17.9119	17.7668	17.7327	17.6286	17.6548	17.6137	17.5685	17.6755	17.666	17.6143	C8V1S4	ANIA_10791		+	0.190256	2.35465		0.0355357	0.619565	1-phosphatidylinositol 4-kinase activity;adenyl nucleotide binding;adenyl ribonucleotide binding;ATP binding;binding;catalytic activity;inositol or phosphatidylinositol kinase activity;kinase activity;lipid kinase activity;nucleotide binding;phosphatidylinositol kinase activity;phosphotransferase activity, alcohol group as acceptor;purine nucleotide binding;purine ribonucleoside triphosphate bind…			PI3_PI4_kinase	IPR000403;IPR018936	PI3/4_kinase_cat_dom;PI3/4_kinase_CS	PS00916	PI3_4_KINASE_2			PF00454	MM_CE		18	18	18	20.5	20.5	20.5	88.968		0	49.763	889680000	22	0.00183185	4.43081	0.177974	1.33273	C8V1S4
16.4033	16.391	16.416	16.5856	16.6985	16.8255	16.9699	17.0388	15.9134	16.1252	15.9243	C8V1S9	ANIA_11244		+	-0.43421	2.56552	+	-0.89554	3.40512	active transmembrane transporter activity;amine transmembrane transporter activity;amino acid transmembrane transporter activity;carboxylic acid transmembrane transporter activity;L-amino acid transmembrane transporter activity;L-serine transmembrane transporter activity;neutral amino acid transmembrane transporter activity;organic acid transmembrane transporter activity;serine transmembrane tran…	amine transport;amino acid transport;establishment of localization;organic acid transport;transport		Serinc	IPR005016;IPR029559	TDE1/TMS;Tms1-like					PF03348	MM_CE	PD_CE	4	4	4	11.2	11.2	11.2	50.432		0	71.981	680930000	6	0.00123993	-4.89688	0.00024359	-8.39278	C8V1S9
15.1723	15.1242	15.5771	16.0616	15.9433	15.596	15.7026	16.2573	15.0146	15.1529	15.0564	C8V1T0	ANIA_09490			-0.391004	0.72813	+	-0.800138	2.20251	active transmembrane transporter activity;amine transmembrane transporter activity;amino acid transmembrane transporter activity;carboxylic acid transmembrane transporter activity;organic acid transmembrane transporter activity;substrate-specific transmembrane transporter activity;substrate-specific transporter activity;transmembrane transporter activity;transporter activity			AA_permease_2	IPR002293	AA/rel_permease1					PF13520		PD_CE	2	2	2	4.3	4.3	4.3	56.169		0	8.6618	71051000	2	0.076889	-1.4892	0.0025468	-4.52167	C8V1T0
18.5003	18.5978	18.4962	18.5444	18.4344	18.4146	18.5194	18.4402	18.3221	18.3261	18.3179	C8V1T1	ANIA_10785		+	0.0825105	1.32907	+	-0.13014	2.29413												MM_CE	PD_CE	9	9	9	58	58	58	26.094		0	149.2	1823300000	20	0.0152492	2.49453	0.00194006	-4.75541	C8V1T1
16.586	16.7876	17.1565	16.6582	16.7155	16.5827	16.5837	16.667	16.4495	16.8579	17.0366	C8V1T2	ANIA_10782			0.159846	0.57161		0.144084	0.417733	active transmembrane transporter activity;anion transmembrane transporter activity;cation transmembrane transporter activity;copper ion transmembrane transporter activity;copper uptake transmembrane transporter activity;inorganic anion transmembrane transporter activity;inorganic cation transmembrane transporter activity;inorganic phosphate transmembrane transporter activity;ion transmembrane tra…	biological regulation;cellular homeostasis;cellular ion homeostasis;cellular process;establishment of localization;homeostatic process;ion transport;transmembrane transport;transport		Mito_carr	IPR018108;IPR023395	Mitochondrial_sb/sol_carrier;Mt_carrier_dom	PS50920	SOLCAR			PF00153			2	2	2	4.9	4.9	4.9	31.79		0.0077044	1.836	282380000	3	0.12437	1.22023	0.379524	0.95774	C8V1T2
15.6232	15.579	15.7597	15.5651	15.4923	15.5924	15.76	15.6397	15.4445	15.4837	15.4875	C8V1T8	ANIA_10781			0.0106559	0.0526445	+	-0.1492	1.12112	binding;nucleic acid binding;RNA binding;snRNA binding;U6 snRNA binding	cellular component assembly;cellular component organization;cellular macromolecular complex assembly;cellular metabolic process;cellular nitrogen compound metabolic process;cellular process;macromolecular complex assembly;macromolecule metabolic process;metabolic process;mRNA metabolic process;mRNA processing;nitrogen compound metabolic process;nucleobase-containing compound metabolic process;pri…		LSM	IPR001163;IPR006649;IPR010920;IPR027141	LSM_dom;LSm4/Sm_D1/D3;Ribonucl_LSM;Ribonucl_LSM_euk/arc					PF01423		PD_CE	4	4	4	31.9	31.9	31.9	13.276		0	11.648	2789100000	5	0.818273	0.149788	0.0335655	-2.23527	C8V1T8
17.5525	17.6093	17.56	17.3189	17.2135	17.0966	17.119	17.2098	17.1275	17.0136	17.3519	C8V1T9	ANIA_10784		+	0.350458	2.56092		0.004625	0.0171669												MM_CE		7	7	7	10.8	10.8	10.8	61.6		0	9.5507	204300000	7	0.00123597	4.88639	0.970613	0.0510756	C8V1T9
17.1329	17.1364	17.069	17.1843	17.1712	17.2367	17.1947	17.1729	16.8973	16.7137	16.589	C8V1U1	ANIA_10780		+	-0.0632577	1.18218	+	-0.460547	2.72614	catalytic activity;hydrolase activity;hydrolase activity, acting on ester bonds;inositol or phosphatidylinositol phosphatase activity;lipid phosphatase activity;phosphatase activity;phosphatidylinositol trisphosphate phosphatase activity;phosphatidylinositol-3,4,5-trisphosphate 3-phosphatase activity;phosphoprotein phosphatase activity;phosphoric ester hydrolase activity;protein tyrosine phosphat…	anatomical structure formation involved in morphogenesis;biological regulation;cell wall organization;cell wall organization or biogenesis;cellular cell wall organization;cellular cell wall organization or biogenesis;cellular component assembly;cellular component organization;cellular homeostasis;cellular lipid metabolic process;cellular metabolic process;cellular process;developmental process;ex…		DSPc	IPR000340;IPR016130;IPR029021;IPR029023	Dual-sp_phosphatase_cat-dom;Prot-tyrosine_phosphatase-like;Tensin_lipid_phosphatase_dom;Tyr_Pase_AS	PS00383;PS51181	PPASE_TENSIN;TYR_PHOSPHATASE_1			PF00782	MM_CE	PD_CE	6	6	6	13.8	13.8	13.8	66.972		0	77.109	265030000	7	0.0218738	-2.2467	0.000761829	-5.9766	C8V1U1
17.7473	17.8988	17.6218	17.6256	18.0833	18.0117	18.0142	18.1045	18.0713	18.0028	18.2553	C8V1U5	ANIA_06208		+	-0.330016	2.49874		0.0563887	0.345535					IPR013830	SGNH_hydro						MM_CE		7	7	7	13.1	13.1	13.1	45.441		0	106.68	652510000	10	0.00149824	-4.74608	0.466596	0.81659	C8V1U5
17.6532	17.8078	17.7333	17.5565	17.5829	17.5626	17.6327	17.6721	17.7921	17.783	17.7878	C8V1V1	ANIA_06716			0.0751252	0.598133	+	0.175029	2.72457				Complex1_LYR	IPR008011	Complex1_LYR							PD_CE	7	7	7	19.4	19.4	19.4	40.153		0	87.379	397260000	11	0.114338	1.26652	0.000761224	5.97175	C8V1V1
17.7224	17.6281	17.5178	17.2876	16.7372	16.6105	17.5287	17.0089	18.0244	17.7694	17.8947	C8V1V2	ANIA_10847		+	0.567657	1.35213	+	0.924853	1.86327											PF17304	MM_CE	PD_CE	5	5	5	20.4	20.4	20.4	15.598		0	17.689	2657200000	7	0.0143422	2.53382	0.0054059	3.72084	C8V1V2
21.151	21.0152	20.8759	20.8303	20.4468	20.4117	20.5046	20.5595	21.0208	20.9988	20.9354	C8V1V3	ANIA_06717		+	0.487479	3.06542	+	0.504402	4.05135	binding;catalytic activity;L-malate dehydrogenase activity;malate dehydrogenase activity;mRNA binding;nucleic acid binding;oxidoreductase activity;oxidoreductase activity, acting on CH-OH group of donors;oxidoreductase activity, acting on the CH-OH group of donors, NAD or NADP as acceptor;RNA binding	aging;carbohydrate metabolic process;catabolic process;cellular ketone metabolic process;cellular metabolic process;cellular process;cofactor metabolic process;developmental process;metabolic process;organic acid metabolic process;primary metabolic process;small molecule metabolic process		Ldh_1_C;Ldh_1_N	IPR001236;IPR001252;IPR001557;IPR010097;IPR015955;IPR016040;IPR022383	Lactate/malate_DH_C;Lactate/malate_DH_N;Lactate_DH/Glyco_Ohase_4_C;L-lactate/malate_DH;Malate_DH_AS;Malate_DH_type1;NAD(P)-bd_dom	PS00068	MDH	Malate dehydrogenase		PF00056;PF02866	MM_CE	PD_CE	19	18	18	60.6	57.4	57.4	35.742		0	323.31	108950000000	135	0.000598179	6.13204	6.36364e-05	11.4542	C8V1V3
18.177	18.2501	18.243	18.3617	19.073	18.9196	18.9147	18.9237	17.9518	18.0885	17.6728	C8V1V4	ANIA_06718		+	-0.699798	4.87275	+	-1.05337	3.63953	adenyl nucleotide binding;adenyl ribonucleotide binding;ATP binding;binding;nucleotide binding;purine nucleotide binding;purine ribonucleoside triphosphate binding;purine ribonucleotide binding;ribonucleotide binding			AAA	IPR003593;IPR003959;IPR027417	AAA+_ATPase;ATPase_AAA_core;P-loop_NTPase					PF00004	MM_CE	PD_CE	15	15	15	20.2	20.2	20.2	93.556		0	189.7	1972400000	26	0	-12.8904	0.000232339	-9.40419	C8V1V4
15.9459	15.9401	15.8967	15.9938	15.7399	15.9289	15.5438	15.911	15.884	15.7781	15.9955	C8V1V6	ANIA_10853		+	0.163226	0.898702		0.104952	0.380483		cellular process;establishment or maintenance of cell polarity;filamentous growth;growth;hyphal growth		HbrB	IPR013745	HbrB					PF08539	MM_CE		4	4	4	5.3	5.3	5.3	97.838		0	25.273	161610000	4	0.0473129	1.77487	0.423804	0.885558	C8V1V6
18.9092	18.8496	18.7534	18.9492	19.0259	19.1001	19.0143	19.0606	18.5637	18.6939	18.5361	C8V1V7	ANIA_10849		+	-0.184882	2.12562	+	-0.452315	3.70144	binding;enzyme regulator activity;GTPase regulator activity;guanyl-nucleotide exchange factor activity;lipid binding;nucleoside-triphosphatase regulator activity;phosphatidylinositol binding;phospholipid binding;Rab guanyl-nucleotide exchange factor activity;Ras guanyl-nucleotide exchange factor activity;small GTPase regulator activity	autophagy;biological regulation;catabolic process;cell communication;cellular component organization;cellular membrane organization;cellular metabolic process;cellular process;establishment of localization;membrane fusion;membrane invagination;membrane organization;metabolic process;organelle organization;protein transport;regulation of cell cycle;regulation of organelle organization;regulation o…		Clathrin;CNH;Vps39_1;Vps39_2	IPR000547;IPR001180;IPR011047;IPR015943;IPR019452;IPR019453	Citron;Clathrin_H-chain/VPS_repeat;Quinonprotein_ADH-like_supfam;VPS39/TGF_beta_rcpt-assoc_1;VPS39/TGF_beta_rcpt-assoc_2;WD40/YVTN_repeat-like_dom	PS50219;PS50236	CHCR;CNH			PF00780;PF10366;PF10367	MM_CE	PD_CE	22	22	22	21.9	21.9	21.9	125.4		0	184.46	2791500000	33	0.00262375	-3.95574	0.000173768	-9.68907	C8V1V7
19.5777	19.4493	19.4501	19.4731	19.3612	19.3178	19.3915	19.2451	19.3633	19.3232	19.1834	C8V1V8	ANIA_10844		+	0.158654	1.94428		-0.0389164	0.26809	6-phosphofructo-2-kinase activity;adenyl nucleotide binding;adenyl ribonucleotide binding;ATP binding;binding;carbohydrate kinase activity;carbohydrate phosphatase activity;catalytic activity;fructose-2,6-bisphosphate 2-phosphatase activity;hydrolase activity;hydrolase activity, acting on ester bonds;kinase activity;nucleotide binding;phosphatase activity;phosphofructokinase activity;phosphoric e…	alcohol metabolic process;carbohydrate metabolic process;cellular metabolic process;cellular process;metabolic process;primary metabolic process;small molecule metabolic process		6PF2K;His_Phos_1	IPR001345;IPR003094;IPR013078;IPR013079;IPR027417;IPR029033	6Pfruct_kin;6Phosfructo_kin;His_Pase_superF_clade-1;His_PPase_superfam;PG/BPGM_mutase_AS;P-loop_NTPase	PS00175	PG_MUTASE			PF00300;PF01591	MM_CE		17	17	17	41.5	41.5	41.5	50.409		0	86.143	3596400000	27	0.00373106	3.59983	0.56746	-0.658377	C8V1V8
16.0765	16.7366	16.4525	15.7511	16.0433	16.0726	15.9718	15.8489	17.1801	16.9201	17.5019	C8V1W0	ANIA_10848			0.269987	0.572188	+	1.21651	3.30002	binding;nucleic acid binding;nucleotide binding			RRM_1	IPR000504;IPR012677	Nucleotide-bd_a/b_plait;RRM_dom	PS50102	RRM			PF00076		PD_CE	8	8	8	26.2	26.2	26.2	37.561		0	29.192	249360000	8	0.124163	1.22124	0.000326241	7.97169	C8V1W0
13.853	13.9519	13.9379	15.0164	16.0205	15.9973	16.0382	15.8936	13.878	14.2036	14.2115	C8V1W1	ANIA_10845		+	-1.79763	3.18538	+	-1.88972	5.1254	substrate-specific transmembrane transporter activity;substrate-specific transporter activity;transmembrane transporter activity;transporter activity			Sugar_tr	IPR003663;IPR005828;IPR020846	MFS_dom;Sub_transporter;Sugar/inositol_transpt	PS50850	MFS			PF00083	MM_CE	PD_CE	2	2	2	3.3	3.3	3.3	72.824		0	5.1147	101000000	2	0.000447312	-6.45967	0	-18.9747	C8V1W1
15.4563	15.5249	15.4935	15.5009	16.0536	16.071	16.1907	16.1132	15.6785	15.6081	15.3194	C8V1W4	ANIA_06725		+	-0.613232	5.75207	+	-0.571795	2.66446	binding;cation binding;ion binding;metal ion binding;transition metal ion binding;zinc ion binding			RINGv	IPR001841;IPR011016;IPR013083	Znf_RING;Znf_RING/FYVE/PHD;Znf_RING-CH	PS51292	ZF_RING_CH			PF12906	MM_CE	PD_CE	3	3	3	13.5	13.5	13.5	34.271		0	17.207	110860000	5	0	-18.2034	0.000834809	-5.78911	C8V1W4
11.8333	11.6781	12.0111	11.7879	12.0114	12.1984	12.6386	12.4878	12.1986	12.0416	12.3609	C8V1W8	ANIA_06729		+	-0.506489	1.74251		-0.133676	0.30112	binding;catalytic activity;cation binding;cofactor binding;ion binding;metal ion binding;molybdenum ion binding;pyridoxal phosphate binding;transition metal ion binding;vitamin B6 binding;vitamin binding			MOSC;MOSC_N	IPR005302;IPR005303	MoCF_Sase_C;MOSC_N	PS51340	MOSC			PF03473;PF03476	MM_CE		2	2	2	1.7	1.7	1.7	53.637		0.0086437	1.8083	7451700	2	0.0059403	-3.22197	0.523779	-0.726872	C8V1W8
16.0605	16.1221	16.2579	15.8268	15.8994	15.7452	15.9403	15.9231	16.179	15.9552	16.55	C8V1X1	ANIA_10851		+	0.189834	0.967007	+	0.351078	1.14144												MM_CE	PD_CE	4	4	4	24	24	24	21.23		0	97.767	315840000	5	0.0396735	1.88839	0.0316535	2.2726	C8V1X1
17.3857	17.4919	17.6728	17.4815	17.194	17.4711	17.5082	17.581	17.2951	17.2005	17.4447	C8V1X2	ANIA_06732			0.0693545	0.276859		-0.125168	0.479168	binding;calcium ion binding;cation binding;ion binding;metal ion binding	cellular localization;cellular process;localization		EF-hand_6	IPR002048;IPR011992	EF_hand_dom;EF-hand-dom_pair	PS50222	EF_HAND_2						5	4	4	32.7	32.7	32.7	12.143		0	9.2857	2475700000	7	0.336379	0.668606	0.307482	-1.07432	C8V1X2
19.7535	19.7857	19.6264	19.7233	19.655	19.775	19.7393	19.559	19.675	19.7418	19.6542	C8V1X4	ANIA_06734			0.0401549	0.281888		0.00823959	0.0467455	binding;nuclear localization sequence binding;peptide binding;signal sequence binding	establishment of localization;nuclear transport;nucleobase-containing compound transport;nucleocytoplasmic transport;protein targeting;protein transport;transport		Xpo1	IPR011989;IPR013598;IPR016024	ARM-like;ARM-type_fold;Exportin-1/Importin-b-like					PF08389			18	18	18	24.3	24.3	24.3	85.543		0	167.68	4888700000	37	0.32998	0.678868	0.923831	0.134898	C8V1X4
NaN	NaN	NaN	NaN	NaN	NaN	NaN	NaN	NaN	NaN	NaN	C8V1X5	ANIA_06735			0	NaN		0	NaN		cellular component assembly;cellular component organization;cellular macromolecular complex assembly;cellular process;macromolecular complex assembly;ribonucleoprotein complex assembly		LSM	IPR001163;IPR006649;IPR010920;IPR027078	LSM_dom;Ribonucl_LSM;Ribonucl_LSM_euk/arc;snRNP-E					PF01423			1	1	1	11.7	11.7	11.7	10.641		0.0016239	2.5714	0	0	1	NaN	1	NaN	C8V1X5
19.8451	19.946	19.8964	19.8005	20.0841	20.0914	20.0863	20.0721	19.9408	19.9025	19.9268	C8V1X8	ANIA_06738		+	-0.211508	3.25622	+	-0.160097	4.6502	structural constituent of nuclear pore;structural molecule activity	establishment of localization;nuclear transport;nucleocytoplasmic transport;transport		Nucleoporin_C;Nucleoporin_N	IPR004870;IPR007187;IPR014908	Nucleoporin_Nup133/Nup155_C;Nucleoporin_Nup133/Nup155_N;Nucleoporin_Nup155					PF03177;PF08801	MM_CE	PD_CE	26	26	26	24.2	24.2	24.2	148.66		0	323.31	9755200000	58	0.00044241	-6.65947	0.000127563	-15.1954	C8V1X8
16.2157	16.1567	16.1892	15.6508	15.4012	15.2504	15.3748	15.5563	15.3774	15.1045	15.4758	C8V1Y0	ANIA_06740		+	0.657425	2.35151		-0.0764669	0.260607				DUF2781	IPR016964	Transmembrane_6/97						MM_CE		1	1	1	3.6	3.6	3.6	25.51		0.0019458	2.5385	160490000	1	0.00182668	4.42408	0.577884	-0.642622	C8V1Y0
21.1146	21.1722	21.2527	21.1805	21.3389	21.1391	21.2526	21.1721	21.3144	21.3389	21.5225	C8V202	ANIA_06202			-0.045701	0.376264	+	0.166232	1.09159	structural constituent of ribosome;structural molecule activity	biosynthetic process;cellular component assembly;cellular component organization;cellular macromolecular complex assembly;cellular metabolic process;cellular process;macromolecular complex assembly;macromolecule metabolic process;metabolic process;primary metabolic process;protein metabolic process;ribonucleoprotein complex assembly;translation		Ribosomal_L3	IPR000597;IPR009000;IPR019926	Ribosomal_L3;Ribosomal_L3_CS;Transl_B-barrel	PS00474	RIBOSOMAL_L3			PF00297		PD_CE	29	29	29	52.8	52.8	52.8	44.408		0	207	102500000000	122	0.235863	-0.864609	0.0366024	2.18125	C8V202
19.3858	19.3941	19.3591	19.583	19.6978	19.7796	19.7384	19.8297	19.3993	19.4721	19.268	C8V212	broA		+	-0.330872	2.87657	+	-0.381569	2.84358	catalytic activity;cysteine-type peptidase activity;hydrolase activity;peptidase activity;peptidase activity, acting on L-amino acid peptides;small conjugating protein-specific protease activity;ubiquitin-specific protease activity	cellular component organization;cellular membrane organization;cellular metabolic process;cellular process;endosome transport;establishment of localization;macromolecule metabolic process;macromolecule modification;membrane organization;metabolic process;organelle organization;primary metabolic process;protein metabolic process;protein modification by small protein conjugation or removal;protein …		ALIX_LYPXL_bnd;BRO1	IPR004328;IPR025304	ALIX_V_dom;BRO1_dom	PS51180	BRO1	Vacuolar protein-sorting protein bro1		PF03097;PF13949	MM_CE	PD_CE	25	25	25	27.7	27.7	27.7	110.59		0	187.74	7038400000	42	0.000715172	-5.64195	0.000652397	-6.34686	C8V212
19.0115	18.9533	19.089	18.6779	18.4439	18.3728	18.3348	18.4271	19.0359	19.0216	19.4655	C8V213	AN10778		+	0.53826	2.93686	+	0.779663	2.80306	adenyl nucleotide binding;adenyl ribonucleotide binding;ATP binding;ATPase activator activity;ATPase regulator activity;binding;cation binding;chaperone binding;enzyme activator activity;enzyme regulator activity;ion binding;metal ion binding;nucleoside-triphosphatase regulator activity;nucleotide binding;protein binding;purine nucleotide binding;purine ribonucleoside triphosphate binding;purine …	cellular component organization;cellular metabolic process;cellular process;macromolecule metabolic process;metabolic process;mitochondrion organization;organelle organization;primary metabolic process;protein folding;protein metabolic process;proteolysis;proteolysis involved in cellular protein catabolic process;response to abiotic stimulus;response to heat;response to stimulus;response to stress		CTDII;DnaJ;DnaJ_CXXCXGXG	IPR001305;IPR001623;IPR002939;IPR008971;IPR012724;IPR018253	DnaJ;DnaJ_C;DnaJ_domain;DnaJ_domain_CS;HSP_DnaJ_Cys-rich_dom;HSP40/DnaJ_pept-bd	PS00636;PS50076;PS51188	DNAJ_1;DNAJ_2;ZF_CR	DnaJ homolog 1, mitochondrial		PF00226;PF00684;PF01556	MM_CE	PD_CE	15	15	15	26.7	26.7	26.7	57.631		0	91.146	1877300000	27	0.000690307	5.79512	0.000655847	6.21708	C8V213
17.9521	17.9907	18.1377	17.9318	17.8979	17.8395	17.8234	17.7926	18.0697	17.9758	18.1284	C8V216	ANIA_06191		+	0.164739	1.72953	+	0.219628	2.3221				cobW	IPR003495;IPR027417	CobW/HypB/UreG_dom;P-loop_NTPase					PF02492	MM_CE	PD_CE	9	9	9	23.8	23.8	23.8	41.934		0	64.6	1369900000	15	0.00602431	3.19825	0.00186979	4.82839	C8V216
17.6165	17.5777	17.6389	17.5961	17.2647	17.3766	17.2671	17.2789	17.6685	17.7325	17.738	C8V219	ANIA_06188		+	0.310492	4.33539	+	0.416194	4.02668				HD_3	IPR003607;IPR006674	HD/PDEase_dom;HD_domain					PF13023	MM_CE	PD_CE	5	5	5	19.1	19.1	19.1	26.342		0	25.715	790910000	8	8.47458e-05	10.4038	6.23608e-05	11.3206	C8V219
19.7691	19.4949	19.68	19.7974	20.2447	20.3196	20.2622	20.334	19.9266	20.019	19.7177	C8V223	ANIA_10783		+	-0.604764	3.82314	+	-0.402329	2.42472	binding;catalytic activity;coenzyme binding;cofactor binding;NAD binding;nucleotide binding;oxidoreductase activity;oxidoreductase activity, acting on CH-OH group of donors;oxidoreductase activity, acting on the CH-OH group of donors, NAD or NADP as acceptor;phosphogluconate dehydrogenase (decarboxylating) activity	alcohol metabolic process;carbohydrate metabolic process;catabolic process;cellular metabolic process;cellular nitrogen compound metabolic process;cellular process;cofactor metabolic process;heterocycle metabolic process;metabolic process;nitrogen compound metabolic process;nucleobase-containing compound metabolic process;nucleobase-containing small molecule metabolic process;nucleotide metabolic…		NAD_binding_11;NAD_binding_2	IPR006115;IPR008927;IPR013328;IPR015815;IPR016040;IPR029154	6PGD_dom_2;6PGDH_NADP-bd;6-PGluconate_DH_C-like;HIBADH-related;NAD(P)-bd_dom;NADP-bd					PF03446;PF14833	MM_CE	PD_CE	14	14	14	37.7	37.7	37.7	33.275		0	79.672	9877100000	38	0.000311057	-8.44732	0.0015704	-5.10294	C8V223
14.4365	14.499	14.048	14.36	13.3534	13.5641	13.4533	13.4127	14.2511	14.2372	14.5106	C8V225	ANIA_06183		+	0.890013	3.72982	+	0.887117	3.71241					IPR001810	F-box_dom	PS50181	FBOX			PF12937	MM_CE	PD_CE	2	2	2	10.2	10.2	10.2	33.157		0	5.7261	311820000	2	0.000283499	8.12804	0.000138983	9.74036	C8V225
18.6089	18.597	18.7943	18.6923	18.7712	18.7063	18.8089	18.81	18.6641	18.7336	18.6711	C8V226	ANIA_06182		+	-0.100977	1.00597	+	-0.0845132	1.24741	binding;catalytic activity;cation binding;ion binding;metal ion binding;nucleotidyltransferase activity;transferase activity;transferase activity, transferring phosphorus-containing groups;transition metal ion binding;UDP-glucose:hexose-1-phosphate uridylyltransferase activity;uridylyltransferase activity;zinc ion binding	alcohol metabolic process;biosynthetic process;carbohydrate metabolic process;catabolic process;cellular metabolic process;cellular nitrogen compound metabolic process;cellular process;macromolecule metabolic process;macromolecule modification;metabolic process;nitrogen compound metabolic process;nucleobase-containing compound metabolic process;nucleotide-sugar metabolic process;primary metabolic…		GalP_UDP_tr_C;GalP_UDP_transf	IPR001937;IPR005849;IPR005850;IPR011146;IPR019779	GalP_UDPtransf1;GalP_UDPtransf1_His-AS;GalP_Utransf_C;GalP_Utransf_N;HIT-like	PS00117	GAL_P_UDP_TRANSF_I	Galactose-1-phosphate uridylyltransferase		PF01087;PF02744	MM_CE	PD_CE	13	13	13	36.4	36.4	36.4	43.406		0	122.03	5996400000	29	0.0358334	-1.9531	0.0237627	-2.46942	C8V226
20.1179	19.9525	19.6425	20.303	20.2132	20.3817	20.318	20.4139	20.3092	20.1557	19.9153	C8V232	ANIA_06176		+	-0.327734	1.17204		-0.204974	0.922732		cellular component assembly;cellular component organization;cellular macromolecular complex assembly;cellular process;macromolecular complex assembly;protein complex assembly		TBCA	IPR004226	CofA_tubulin-bd					PF02970	MM_CE		14	14	14	72	72	72	13.406		0	204.1	10182000000	31	0.0224695	-2.22973	0.0606464	-1.87611	C8V232
16.868	16.9563	16.9335	16.8219	16.4349	16.4153	16.3493	16.412	15.9903	16.3795	16.2541	C8V234	ANIA_06174		+	0.492032	5.02818		-0.194907	0.980393				DBD_Tnp_Mut	IPR004332	Transposase_MuDR					PF03108	MM_CE		3	3	3	7.4	7.4	7.4	43.242		0	6.0915	132510000	3	0	13.7069	0.0508861	-1.9797	C8V234
15.0931	15.1425	15.0349	15.2468	15.2504	15.3194	15.2699	15.3846	14.8014	15.017	15.0434	C8V235	ANIA_06173		+	-0.176767	1.77187	+	-0.35213	2.31391	binding;cation binding;DNA binding;ion binding;metal ion binding;nucleic acid binding;nucleic acid binding transcription factor activity;sequence-specific DNA binding RNA polymerase II transcription factor activity;sequence-specific DNA binding transcription factor activity;transition metal ion binding;zinc ion binding			Fungal_trans;Zn_clus	IPR001138;IPR007219	Transcription_factor_dom_fun;Zn2-C6_fun-type_DNA-bd	PS00463;PS50048	ZN2_CY6_FUNGAL_1;ZN2_CY6_FUNGAL_2			PF00172;PF04082	MM_CE	PD_CE	2	2	2	2.1	2.1	2.1	85.652		0.00050369	3.4851	50553000	2	0.00556701	-3.27588	0.001889	-4.80695	C8V235
15.8823	16.0226	15.8128	15.6232	16.2056	15.8619	16.0069	16.0097	15.5158	15.4695	15.7596	C8V246	ANIA_06162	x		-0.185822	0.856875	+	-0.439401	1.94682	carboxyl-O-methyltransferase activity;catalytic activity;methyltransferase activity;O-methyltransferase activity;protein carboxyl O-methyltransferase activity;protein C-terminal carboxyl O-methyltransferase activity;protein C-terminal S-isoprenylcysteine carboxyl O-methyltransferase activity;protein methyltransferase activity;S-adenosylmethionine-dependent methyltransferase activity;transferase a…	cellular localization;cellular metabolic process;cellular process;localization;macromolecule metabolic process;macromolecule modification;metabolic process;one-carbon metabolic process;peptidyl-amino acid modification;primary metabolic process;protein alkylation;protein maturation;protein metabolic process;protein modification process;small molecule metabolic process		ICMT	IPR007269;IPR025770	ICMT_MeTrfase;PPMT_MeTrfase	PS51564	SAM_ICMT	Protein-S-isoprenylcysteine O-methyltransferase		PF04140		PD_CE	2	2	2	6.8	6.8	6.8	35.619		0	20.048	153850000	3	0.053341	-1.70521	0.00437212	-3.90932	C8V246
15.3483	15.1923	15.2874	15.746	16.0386	16.1482	16.1641	16.1032	15.0855	15.1368	15.1377	C8V247	ANIA_06161		+	-0.720051	2.9232	+	-0.993513	5.91725					IPR030476	Pentaxin_CS	PS00289	PENTAXIN				MM_CE	PD_CE	4	4	4	5.7	5.7	5.7	77.124		0	9.3214	287820000	5	0.000684241	-5.76017	0	-27.4079	C8V247
NaN	NaN	NaN	NaN	NaN	NaN	NaN	NaN	NaN	NaN	NaN	C8V248	ANIA_06759			0	NaN		0	NaN	binding;cation binding;ion binding;metal ion binding;nucleic acid binding transcription factor activity;sequence-specific DNA binding RNA polymerase II transcription factor activity;sequence-specific DNA binding transcription factor activity;transition metal ion binding;zinc ion binding			Zn_clus	IPR001138	Zn2-C6_fun-type_DNA-bd	PS00463;PS50048	ZN2_CY6_FUNGAL_1;ZN2_CY6_FUNGAL_2			PF00172			1	1	1	3	3	3	55.845	+	1	-2	0	0	1	NaN	1	NaN	C8V248
19.2379	18.9582	18.6762	18.7298	17.5667	17.4918	17.5056	17.422	17.5677	17.5475	17.4439	C8V250	ANIA_06761		+	1.40397	4.40197		0.0231837	0.189309	acyl-CoA dehydrogenase activity;binding;catalytic activity;coenzyme binding;cofactor binding;flavin adenine dinucleotide binding;oxidoreductase activity;oxidoreductase activity, acting on the CH-CH group of donors			Acyl-CoA_dh_1;Acyl-CoA_dh_M;Acyl-CoA_dh_N	IPR006091;IPR009075;IPR009100;IPR013786	AcylCo_DH/oxidase_C;AcylCoA_DH/ox_N;AcylCoA_DH/oxidase_NM_dom;Acyl-CoA_Oxase/DH_cen-dom					PF00441;PF02770;PF02771	MM_CE		10	10	10	26.2	26.2	26.2	46.857		0	52.684	1263300000	16	0	10.6858	0.689256	0.487263	C8V250
15.6998	15.7024	15.7584	16.3921	16.7163	16.9931	16.7537	16.6613	15.2482	15.5712	15.1087	C8V257	ANIA_06768		+	-0.89291	2.54956	+	-1.47173	3.81795	adenyl nucleotide binding;adenyl ribonucleotide binding;ATP binding;binding;catalytic activity;kinase activity;nucleotide binding;phosphotransferase activity, alcohol group as acceptor;protein kinase activity;purine nucleotide binding;purine ribonucleoside triphosphate binding;purine ribonucleotide binding;ribonucleotide binding;transferase activity;transferase activity, transferring phosphorus-c…			Pkinase	IPR000719;IPR008271;IPR011009;IPR011042	6-blade_b-propeller_TolB-like;Kinase-like_dom;Prot_kinase_dom;Ser/Thr_kinase_AS	PS00108;PS50011	PROTEIN_KINASE_DOM;PROTEIN_KINASE_ST			PF00069	MM_CE	PD_CE	5	5	5	5.4	5.4	5.4	102.2		0	7.2916	147860000	6	0.00140673	-4.86056	0.000151993	-10.2467	C8V257
18.2605	18.0008	18.2362	18.756	18.7829	18.8712	18.7721	18.7343	18.3329	18.4426	18.4523	C8V264	ANIA_06775		+	-0.476746	1.59412	+	-0.380846	3.3377		amine metabolic process;biosynthetic process;cellular amide metabolic process;cellular ketone metabolic process;cellular metabolic process;cellular nitrogen compound metabolic process;cellular process;drug metabolic process;heterocycle metabolic process;metabolic process;nitrogen compound metabolic process;organic acid metabolic process;small molecule metabolic process;sulfur compound metabolic p…		AAT	IPR005079	Peptidase_C45					PF03417	MM_CE	PD_CE	7	7	6	16.8	16.8	13.9	38.009		0	15.069	2079100000	15	0.00819714	-2.95458	0.000255319	-8.12046	C8V264
15.7261	15.5217	16.3061	15.9284	16.0404	15.9131	15.8341	16.2979	15.8523	15.8645	16.1086	C8V277	ANIA_06787			-0.150798	0.327831		-0.0795795	0.227993	binding;catalytic activity;cation binding;heme binding;ion binding;iron ion binding;metal ion binding;monooxygenase activity;oxidoreductase activity;oxidoreductase activity, acting on paired donors, with incorporation or reduction of molecular oxygen;tetrapyrrole binding;transition metal ion binding			p450	IPR001128;IPR002401;IPR017972	Cyt_P450;Cyt_P450_CS;Cyt_P450_E_grp-I	PS00086	CYTOCHROME_P450			PF00067			3	3	3	6.2	6.2	6.2	61.737		0.0011477	2.7928	106570000	3	0.279762	-0.770805	0.627106	-0.572806	C8V277
18.9769	18.2958	18.3226	18.6422	18.094	18.4446	18.3496	18.0349	20.4367	19.7392	19.4974	C8V287	ANIA_06796		+	0.328624	0.883212	+	1.66031	2.83341				DJ-1_PfpI	IPR002818;IPR029062	Class_I_gatase-like;ThiJ/PfpI					PF01965	MM_CE	PD_CE	10	10	10	41.8	41.8	41.8	25.53		0	43.781	2544900000	16	0.0495725	1.74909	0.000647684	6.31409	C8V287
15.3676	15.5679	15.7115	15.2544	15.2085	15.2297	15.1584	15.3025	15.8749	15.6806	16.1376	C8V2A5	ANIA_06150		+	0.250563	1.24851	+	0.672896	2.66357	binding;GTP binding;guanyl nucleotide binding;guanyl ribonucleotide binding;nucleotide binding;purine nucleotide binding;purine ribonucleoside triphosphate binding;purine ribonucleotide binding;ribonucleotide binding	anatomical structure development;anatomical structure morphogenesis;cell budding;cell division;cell morphogenesis;cellular component disassembly;cellular component morphogenesis;cellular component organization;cellular process;developmental process;establishment or maintenance of cell polarity;reproduction		Anillin;PH	IPR001849;IPR011993;IPR012966	DUF1709;PH_domain;PH_like_dom	PS50003	PH_DOMAIN			PF00169;PF08174	MM_CE	PD_CE	6	6	6	4	4	4	148.35		0	9.9591	77179000	6	0.0186242	2.35814	0.000834488	5.78644	C8V2A5
17.988	18.0597	18.0448	17.6881	17.3422	17.8204	17.2972	17.5918	18.4816	18.2706	18.9682	C8V2A9	ANIA_06146		+	0.432237	1.56079	+	1.06055	2.2812	structural constituent of ribosome;structural molecule activity	biosynthetic process;cellular metabolic process;cellular process;macromolecule metabolic process;metabolic process;primary metabolic process;protein metabolic process;translation		Ribosomal_L14	IPR000218;IPR005745;IPR019972;IPR023571	Ribosomal_L14_bac-type;Ribosomal_L14_CS;Ribosomal_L14_dom;Ribosomal_L14b/L23e	PS00049	RIBOSOMAL_L14			PF00238	MM_CE	PD_CE	5	5	5	38.9	38.9	38.9	14.304		0	11.435	925350000	9	0.00865728	2.89559	0.00199487	4.72194	C8V2A9
18.2207	18.193	18.0199	18.3592	18.1859	18.2898	18.3301	18.3825	18.2327	18.1453	17.8185	C8V2B0	ANIA_06145			-0.0988679	0.570383	+	-0.231561	0.985909	catalytic activity;cis-trans isomerase activity;isomerase activity;peptidyl-prolyl cis-trans isomerase activity	biological regulation;biosynthetic process;cellular component organization;cellular metabolic process;cellular nitrogen compound metabolic process;cellular process;chromatin modification;chromatin organization;chromosome organization;histone modification;macromolecule metabolic process;macromolecule modification;metabolic process;nitrogen compound metabolic process;nucleobase-containing compound …		Rotamase;WW	IPR000297;IPR001202	PPIase_PpiC;WW_dom	PS01159;PS50020;PS50198	PPIC_PPIASE_2;WW_DOMAIN_1;WW_DOMAIN_2			PF00397;PF00639		PD_CE	5	5	5	31.2	31.2	31.2	20.038		0	38.502	3027700000	11	0.124774	-1.21808	0.0499691	-1.98964	C8V2B0
19.1096	19.0419	18.9685	18.9334	18.9999	19.1539	18.954	18.8768	19.2688	19.1126	19.1152	C8V2B3	ANIA_06142			0.0172038	0.0888544	+	0.169387	1.03533	binding;nucleic acid binding;nucleotide binding;RNA binding;RNA cap binding	cellular metabolic process;cellular nitrogen compound metabolic process;cellular process;macromolecule metabolic process;metabolic process;mRNA metabolic process;mRNA processing;nitrogen compound metabolic process;nucleobase-containing compound metabolic process;primary metabolic process;RNA metabolic process;RNA processing;RNA splicing			IPR000504;IPR012677;IPR027157	NCBP2;Nucleotide-bd_a/b_plait;RRM_dom	PS50102	RRM			PF00076		PD_CE	10	10	10	41.1	41.1	41.1	21.365		0	49.784	3174800000	20	0.711203	0.244517	0.0432823	2.07894	C8V2B3
15.9375	15.683	15.5079	15.7409	16.8375	16.792	17.1083	17.0669	15.6945	15.4482	15.5712	C8V2C9;C8VP73;C8VIN4	ANIA_03088;ANIA_06127;ANIA_10305		+	-1.23386	4.32322	+	-1.37987	4.21311	cation transmembrane transporter activity;hydrogen ion transmembrane transporter activity;inorganic cation transmembrane transporter activity;ion transmembrane transporter activity;monovalent inorganic cation transmembrane transporter activity;substrate-specific transmembrane transporter activity;substrate-specific transporter activity;transmembrane transporter activity;transporter activity	cellular process;establishment of localization;hydrogen transport;ion transport;transmembrane transport;transport		ATP-synt_C	IPR000245;IPR002379;IPR011555	ATPase_proteolipid_c_like_dom;ATPase_proteolipid_csu;ATPase_proteolipid_su_C_euk					PF00137	MM_CE	PD_CE	2	2	2	9.3	9.3	9.3	15.631		0.0060174	1.9854	3459300000	6	8.28157e-05	-10.3529	7.41722e-05	-12.3678	C8V2C9;C8VP73;C8VIN4
16.8423	16.9463	17.0131	16.821	16.8724	16.8455	16.9953	16.9733	16.789	16.7086	16.7551	C8V2D3	ANIA_06124			-0.0159459	0.100507	+	-0.170702	1.79567	catalytic activity			FAR1;Isochorismatase	IPR000868;IPR004330	FAR1_DNA_bnd_dom;Isochorismatase-like					PF00857		PD_CE	5	5	5	19	19	19	42.614		0	69.872	406330000	7	0.678192	-0.273826	0.0064324	-3.57213	C8V2D3
13.9961	13.9084	13.8879	13.6269	13.2682	13.1724	13.0707	13.3607	13.3944	13.753	13.9711	C8V2D4	ANIA_11500		+	0.636859	3.128	+	0.488198	1.55805		cellular component assembly;cellular component organization;cellular process;establishment of localization;Golgi vesicle transport;macromolecular complex assembly;protein complex assembly;transport;vesicle-mediated transport		Sedlin_N	IPR006722;IPR011012	Longin-like_dom;Sedlin					PF04628	MM_CE	PD_CE	1	1	1	9.7	9.7	9.7	22.013		0	22.378	135520000	2	0.000425358	6.30131	0.0106734	3.07372	C8V2D4
16.9523	16.8504	16.9832	17.1834	18.5081	18.4782	18.4435	18.961	16.7278	16.8552	16.4963	C8V2E0	ANIA_06118		+	-1.60536	4.57161	+	-1.9046	4.01934	acidic amino acid transmembrane transporter activity;active transmembrane transporter activity;amine transmembrane transporter activity;amino acid transmembrane transporter activity;antiporter activity;carboxylic acid transmembrane transporter activity;L-amino acid transmembrane transporter activity;L-aspartate transmembrane transporter activity;L-glutamate transmembrane transporter activity;orga…	amine transport;amino acid transport;establishment of localization;ion transport;organic acid transport;transport		AA_permease	IPR002293;IPR004840;IPR004841	AA/rel_permease1;AA-permease/SLC12A_dom;Amoino_acid_permease_CS	PS00218	AMINO_ACID_PERMEASE_1			PF00324	MM_CE	PD_CE	12	12	12	20.1	20.1	20.1	62.437		0	94.482	2316400000	15	0	-11.4365	6.1674e-05	-11.2811	C8V2E0
16.158	16.1402	16.2478	16.2426	16.6849	16.4816	16.6138	16.6272	16.1305	16.1541	16.211	C8V2F5	ANIA_06816		+	-0.404757	3.65933	+	-0.436709	3.30609				F-box	IPR001810;IPR017986	F-box_dom;WD40_repeat_dom	PS50181	FBOX			PF00646	MM_CE	PD_CE	3	3	3	7.6	7.6	7.6	53.975		0	21.262	223380000	5	0.000308655	-7.89379	0.000327791	-7.99552	C8V2F5
16.6402	16.6153	16.9046	16.6313	16.8678	16.8589	16.8823	16.9198	16.639	16.5187	16.2823	C8V2G4	ANIA_06824		+	-0.184345	1.40138	+	-0.402159	2.19936	catalytic activity;kinase activity;NAD+ kinase activity;phosphotransferase activity, alcohol group as acceptor;transferase activity;transferase activity, transferring phosphorus-containing groups	biosynthetic process;cellular metabolic process;cellular nitrogen compound metabolic process;cellular process;cofactor metabolic process;heterocycle metabolic process;metabolic process;nitrogen compound metabolic process;nucleobase-containing compound metabolic process;nucleobase-containing small molecule metabolic process;nucleotide metabolic process;primary metabolic process;small molecule meta…		NAD_kinase	IPR002504;IPR016064;IPR017437;IPR017438	ATP-NAD_kinase_dom_1;ATP-NAD_kinase_PpnK-typ_all-b;NAD/diacylglycerol_kinase;NADK					PF01513	MM_CE	PD_CE	10	10	10	21.4	21.4	21.4	56.736		0	57.254	339370000	9	0.0127386	-2.61815	0.00255788	-4.51378	C8V2G4
19.1829	19.0866	19.299	19.5496	20.078	20.019	20.024	20.096	19.1441	19.2713	19.4029	C8V2I1	ANIA_06840		+	-0.774744	3.57179	+	-0.781505	4.10438	binding;catalytic activity;cation binding;hydrolase activity;hydrolase activity, acting on ester bonds;hydroxyacylglutathione hydrolase activity;ion binding;metal ion binding;thiolester hydrolase activity;transition metal ion binding;zinc ion binding	amine metabolic process;biosynthetic process;cellular amino acid metabolic process;cellular ketone metabolic process;cellular metabolic process;cellular nitrogen compound metabolic process;cellular process;metabolic process;nitrogen compound metabolic process;organic acid metabolic process;peptide metabolic process;primary metabolic process;small molecule metabolic process;sulfur compound metabol…		Lactamase_B	IPR001279;IPR017782	Beta-lactamas-like;Hydroxyacylglutathione_Hdrlase					PF00753;PF16123	MM_CE	PD_CE	10	10	10	43.7	43.7	43.7	27.968		0	184.79	14883000000	33	0.000406977	-7.61082	6.72269e-05	-11.7465	C8V2I1
18.3939	18.468	18.6779	17.8497	17.4782	17.2928	17.2719	17.3801	18.5099	18.4008	19.2166	C8V2I4	ANIA_06843		+	0.991622	2.79116	+	1.35334	2.77278	structural constituent of ribosome;structural molecule activity	biosynthetic process;cellular metabolic process;cellular process;macromolecule metabolic process;metabolic process;primary metabolic process;protein metabolic process;translation		Ribosomal_L4	IPR002136;IPR013005;IPR023574	Ribosomal_L4/L1e;Ribosomal_L4_dom;Ribosomal_uL4/L1e					PF00573	MM_CE	PD_CE	10	10	10	29.6	29.6	29.6	32.635		0	20.16	10386000000	15	0.0007463	5.43001	0.000660685	6.1215	C8V2I4
20.0107	19.965	20.0148	19.8383	19.8228	19.8601	19.8283	19.8951	20.2779	20.2711	20.1852	C8V2I5	ANIA_06844		+	0.105606	1.25938	+	0.393143	4.2104	3-hydroxyisobutyryl-CoA hydrolase activity;catalytic activity;CoA hydrolase activity;hydrolase activity;hydrolase activity, acting on ester bonds;thiolester hydrolase activity	biological regulation;cellular process;response to stimulus;response to stress;signal transduction			IPR014748;IPR018376;IPR029045	ClpP/crotonase-like_dom;Crontonase_C;Enoyl-CoA_hyd/isom_CS	PS00166	ENOYL_COA_HYDRATASE			PF16113	MM_CE	PD_CE	21	21	21	45.1	45.1	45.1	56.196		0	72.85	8671300000	43	0.0181765	2.37648	7.39762e-05	12.352	C8V2I5
17.5735	17.2058	17.3372	18.4258	17.9508	17.9126	17.8791	17.7465	17.3999	17.4733	17.0084	C8V2I8	ANIA_06847			-0.236646	0.369691	+	-0.578351	2.15037	catalytic activity;hydrolase activity;hydrolase activity, acting on ester bonds;sulfuric ester hydrolase activity			Sulfatase	IPR000917;IPR017849;IPR017850;IPR024607	Alkaline_Pase-like_a/b/a;Alkaline_phosphatase_core;Sulfatase;Sulfatase_CS	PS00149	SULFATASE_2			PF00884		PD_CE	9	9	9	15.6	15.6	15.6	69.572		0	77.398	1114700000	18	0.24099	-0.852047	0.00282765	-4.39219	C8V2I8
17.8078	17.8487	17.7141	17.9006	16.7719	16.726	16.6656	16.5859	17.3194	17.4673	17.4535	C8V2I9	ANIA_06115		+	1.13047	6.00347	+	0.726076	4.10469	binding;cation binding;ion binding;metal ion binding			NicO	IPR011541	Ni/Co_transpt_high_affinity					PF03824	MM_CE	PD_CE	9	9	9	22.2	22.2	22.2	48.306		0	213.68	755390000	8	0	20.075	6.73077e-05	11.7482	C8V2I9
11.3702	11.5148	11.7879	11.9973	12.3296	12.5044	12.5711	12.63	13.2106	12.5981	11.8739	C8V2K3	ANIA_10775		+	-0.841249	2.80021		0.0520487	0.0547067	binding;cation binding;ion binding;metal ion binding;nucleic acid binding transcription factor activity;sequence-specific DNA binding RNA polymerase II transcription factor activity;sequence-specific DNA binding transcription factor activity;transition metal ion binding;zinc ion binding			Fungal_trans_2;Zn_clus	IPR001138;IPR021858	DUF3468;Zn2-C6_fun-type_DNA-bd	PS00463;PS50048	ZN2_CY6_FUNGAL_1;ZN2_CY6_FUNGAL_2			PF00172;PF11951	MM_CE		1	1	1	4.1	4.1	4.1	53.54		0.00050684	3.6523	25453000	1	0.000751064	-5.4522	0.911614	0.156657	C8V2K3
13.8949	13.9539	14.191	14.2504	14.6092	14.6922	14.6462	14.8272	13.8535	13.7789	13.7789	C8V2L5	ANIA_06091		+	-0.62118	3.10936	+	-0.88994	4.59624	binding;cation binding;DNA binding;ion binding;metal ion binding;nucleic acid binding;nucleic acid binding transcription factor activity;sequence-specific DNA binding RNA polymerase II transcription factor activity;sequence-specific DNA binding transcription factor activity;transition metal ion binding;zinc ion binding			Fungal_trans;Zn_clus	IPR001138;IPR007219	Transcription_factor_dom_fun;Zn2-C6_fun-type_DNA-bd	PS00463;PS50048	ZN2_CY6_FUNGAL_1;ZN2_CY6_FUNGAL_2			PF00172;PF04082	MM_CE	PD_CE	2	2	2	2.9	2.9	2.9	81.232		0	6.3656	44227000	2	0.000418792	-6.25052	0.000121475	-14.8155	C8V2L5
17.4509	17.2676	17.4297	17.1892	16.946	16.7405	16.7394	16.6866	17.2669	17.0872	17.4589	C8V2L7	ANIA_11499		+	0.556255	3.20269	+	0.492871	2.14509	active transmembrane transporter activity;ATPase activity;ATPase activity, coupled;ATPase activity, coupled to movement of substances;ATPase activity, coupled to transmembrane movement of ions;ATPase activity, coupled to transmembrane movement of substances;catalytic activity;cation transmembrane transporter activity;cation-transporting ATPase activity;hydrogen ion transmembrane transporter activ…	biosynthetic process;cellular metabolic process;cellular nitrogen compound metabolic process;cellular process;establishment of localization;heterocycle metabolic process;hydrogen transport;ion transport;metabolic process;nitrogen compound metabolic process;nucleobase-containing compound metabolic process;nucleobase-containing small molecule metabolic process;nucleotide metabolic process;primary m…		ATP-synt_Eps	IPR006721	ATPase_F1-cplx_esu_mt					PF04627	MM_CE	PD_CE	6	6	6	62.2	62.2	62.2	8.2783		0	169.79	10394000000	12	0.000456474	6.50805	0.00283941	4.37919	C8V2L7
17.5303	17.5193	17.5607	17.8002	18.7346	18.8766	18.7222	18.884	17.5347	17.637	17.2875	C8V2L9	ANIA_06088		+	-1.20175	5.27153	+	-1.31798	4.32253	cation transmembrane transporter activity;ion transmembrane transporter activity;metal ion transmembrane transporter activity;substrate-specific transmembrane transporter activity;substrate-specific transporter activity;transmembrane transporter activity;transporter activity			CorA;DUF676	IPR002523;IPR007751;IPR029058	AB_hydrolase;DUF676_lipase-like;MgTranspt_CorA/ZnTranspt_ZntB					PF01544;PF05057	MM_CE	PD_CE	17	17	17	14.4	14.4	14.4	131.59		0	36.367	725660000	23	0	-15.0843	8.40841e-05	-13.0244	C8V2L9
15.29	15.3386	15.3731	15.0349	14.7289	14.8546	14.6224	14.7386	15.3666	15.2904	15.4553	C8V2M0	ANIA_06087		+	0.523046	2.93929	+	0.634694	3.59762	binding;cofactor binding;metallochaperone activity;pyridoxal phosphate binding;vitamin B6 binding;vitamin binding	establishment of localization;ion transport;transport		Mito_carr	IPR018108;IPR023395	Mitochondrial_sb/sol_carrier;Mt_carrier_dom	PS50920	SOLCAR			PF00153	MM_CE	PD_CE	2	2	2	5.4	5.4	5.4	50.035		0	3.9213	66713000	2	0.000691533	5.80137	0.000223903	9.21567	C8V2M0
16.9652	17.0756	17.0778	16.7753	16.9998	16.9001	16.9183	16.9127	17.1676	17.0849	17.483	C8V2M2	ANIA_06085			0.0407305	0.218303	+	0.31244	1.50968	adenyl nucleotide binding;adenyl ribonucleotide binding;ATP binding;ATPase activity;ATPase activity, coupled;ATP-dependent helicase activity;ATP-dependent RNA helicase activity;binding;catalytic activity;helicase activity;hydrolase activity;hydrolase activity, acting on acid anhydrides;hydrolase activity, acting on acid anhydrides, in phosphorus-containing anhydrides;nucleoside-triphosphatase act…	cellular metabolic process;cellular nitrogen compound metabolic process;cellular process;macromolecule metabolic process;metabolic process;nitrogen compound metabolic process;nucleobase-containing compound metabolic process;primary metabolic process;RNA metabolic process;RNA processing;rRNA processing		HA2;Helicase_C;OB_NTP_bind	IPR001650;IPR002464;IPR007502;IPR011709;IPR014001;IPR027417	DNA/RNA_helicase_DEAH_CS;DUF1605;Helicase_ATP-bd;Helicase_C;Helicase-assoc_dom;P-loop_NTPase	PS00690;PS51192;PS51194	DEAH_ATP_HELICASE;HELICASE_ATP_BIND_1;HELICASE_CTER			PF00271;PF04408;PF07717		PD_CE	11	11	11	14.2	14.2	14.2	91.598		0	21.642	259510000	12	0.421138	0.54575	0.0120514	2.97647	C8V2M2
14.3177	14.1668	15.1021	14.6177	14.2276	14.1369	14.3769	14.0841	14.4189	14.2539	14.3865	C8V2M4	ANIA_06849			0.344699	0.791764		0.146742	0.818806	binding;core promoter proximal region DNA binding;core promoter proximal region sequence-specific DNA binding;DNA binding;nucleic acid binding;nucleic acid binding transcription factor activity;regulatory region DNA binding;regulatory region nucleic acid binding;RNA polymerase II core promoter proximal region sequence-specific DNA binding;RNA polymerase II regulatory region DNA binding;RNA polyme…	biological regulation;biosynthetic process;cell communication;cellular metabolic process;cellular nitrogen compound metabolic process;cellular process;macromolecule metabolic process;metabolic process;nitrogen compound metabolic process;nucleobase-containing compound metabolic process;primary metabolic process;response to chemical stimulus;response to endogenous stimulus;response to external stim…		bZIP_1	IPR004827	bZIP	PS00036;PS50217	BZIP;BZIP_BASIC			PF00170			2	2	2	5	5	5	35.391	+	1	-2	72532000	2	0.0644646	1.59635	0.0853619	1.69025	C8V2M4
16.0955	16.0912	16.1696	16.0574	15.7331	15.7099	15.718	15.8563	15.7606	15.7617	15.8104	C8V2M6	ANIA_10854		+	0.349072	3.80173		0.0232113	0.213504	catalytic activity;enzyme activator activity;enzyme regulator activity;kinase activator activity;kinase regulator activity;protein kinase activator activity;protein kinase regulator activity;protein serine/threonine kinase activator activity	aging;biological regulation;cellular component organization;cellular metabolic process;cellular process;developmental process;macromolecule metabolic process;macromolecule modification;metabolic process;organelle organization;peroxisome organization;phosphorus metabolic process;primary metabolic process;protein metabolic process;protein modification process;protein phosphorylation		CBS	IPR000644;IPR013785	Aldolase_TIM;CBS_dom	PS51371	CBS			PF00571	MM_CE		5	5	5	9.7	9.7	9.7	47.642		0	55.061	527240000	7	0.000302959	8.37311	0.649607	0.541139	C8V2M6
18.1581	18.2549	18.1623	18.0008	17.7722	17.8247	17.8652	18.0224	18.0598	17.9608	18.0889	C8V2N1	ANIA_10855		+	0.272894	1.9549	+	0.165403	1.16281	binding;catalytic activity;DNA binding;DNA polymerase activity;DNA-directed DNA polymerase activity;nucleic acid binding;nucleotidyltransferase activity;transferase activity;transferase activity, transferring phosphorus-containing groups	biological regulation;cellular component organization;cellular metabolic process;cellular nitrogen compound metabolic process;cellular process;chromosome organization;DNA metabolic process;homeostatic process;macromolecule metabolic process;metabolic process;nitrogen compound metabolic process;nucleobase-containing compound metabolic process;organelle organization;primary metabolic process;telome…		DNA_pol_E_B;Pol_alpha_B_N	IPR007185;IPR013627;IPR016722	DNA_pol_alpha/epsilon_bsu;DNA_pol_alpha_bsu;Pol_alpha_B_N			DNA polymerase alpha subunit B		PF04042;PF08418	MM_CE	PD_CE	13	13	13	18.8	18.8	18.8	74.41		0	44.798	869080000	16	0.00366557	3.62023	0.0299339	2.31198	C8V2N1
19.1016	19.3457	19.2673	19.1164	18.2208	18.2437	18.0378	18.1621	17.9036	18.1909	18.0889	C8V2N2	ANIA_10857		+	1.04163	5.05794		-0.104977	0.535621					IPR029032	AhpD-like						MM_CE		10	10	10	35.3	35.3	35.3	27.061		0	22.279	2449500000	15	0	13.8687	0.249072	-1.17932	C8V2N2
17.4535	17.5791	17.236	18.1316	18.5278	18.6493	18.9589	18.4514	18.479	17.8453	17.6034	C8V2R7	ANIA_11498		+	-1.0468	2.49342	+	-0.670932	1.3312												MM_CE	PD_CE	5	5	5	90.2	90.2	90.2	5.7284		0	27.66	6100500000	12	0.00151337	-4.73422	0.018672	-2.62802	C8V2R7
18.6661	18.5022	19.0154	18.3483	18.161	18.0867	18.1578	18.1176	18.7697	18.5516	19.2731	C8V2R8	ANIA_06083		+	0.502241	1.8839	+	0.73405	2.01985	structural constituent of ribosome;structural molecule activity	cellular component assembly;cellular component disassembly;cellular component organization;cellular macromolecular complex assembly;cellular process;macromolecular complex assembly;ribonucleoprotein complex assembly		Ribosomal_L16	IPR001197;IPR016180;IPR018255	Ribosomal_L10e;Ribosomal_L10e/L16;Ribosomal_L10e_CS	PS01257	RIBOSOMAL_L10E			PF00252	MM_CE	PD_CE	11	11	11	31.7	31.7	31.7	25.478		0	37.588	38019000000	18	0.00430051	3.48488	0.0038111	4.07856	C8V2R8
19.7	19.7571	19.7086	19.6806	19.7543	19.7666	19.7613	19.7598	19.8853	19.8822	19.8992	C8V2S2	ANIA_10769		+	-0.0489273	1.60437	+	0.128401	5.64937		biosynthetic process;cellular metabolic process;cellular process;cytoplasmic translation;macromolecule metabolic process;metabolic process;primary metabolic process;protein metabolic process;translation		DUF3441;DUF814	IPR008532;IPR021846	DUF3441;DUF814					PF05670;PF11923	MM_CE	PD_CE	30	30	30	26.5	26.5	26.5	121.09		0	89.065	2988300000	38	0.00801574	-2.9728	0	24.2077	C8V2S2
18.1316	18.1791	18.3186	18.0877	17.8346	17.78	17.7011	17.7635	18.3391	18.3359	18.5598	C8V2S3	ANIA_10771		+	0.409455	3.42981	+	0.641783	3.58613	adenyl nucleotide binding;adenyl ribonucleotide binding;ATP binding;binding;catalytic activity;DNA binding;double-stranded RNA binding;nucleic acid binding;nucleotide binding;nucleotidyltransferase activity;purine nucleotide binding;purine ribonucleoside triphosphate binding;purine ribonucleotide binding;ribonucleotide binding;RNA binding;sequence-specific DNA binding;single-stranded DNA binding;…	biological regulation;cellular component organization;cellular metabolic process;cellular nitrogen compound metabolic process;cellular process;chromosome organization;DNA metabolic process;heterocycle metabolic process;homeostatic process;macromolecule metabolic process;macromolecule modification;metabolic process;nitrogen compound metabolic process;nucleobase-containing compound metabolic proces…		SUA5;Sua5_yciO_yrdC	IPR005145;IPR006070;IPR010923;IPR017945	DHBP_synth_RibB-like_a/b_dom;SUA5;t(6)A37_SUA5;YrdC-like_dom	PS51163	YRDC	Threonylcarbamoyl-AMP synthase		PF01300;PF03481	MM_CE	PD_CE	10	10	10	28.8	28.8	28.8	46.075		0	33.641	813240000	18	0.000407666	7.16994	0.000221226	9.1646	C8V2S3
18.0812	18.0174	18.0131	18.0638	17.9595	18.1218	18.0149	17.9943	17.6952	17.7216	17.7361	C8V2S8	ANIA_06074			0.0212631	0.219022	+	-0.305	3.08389	binding;mRNA binding;nucleic acid binding;nucleotide binding;RNA binding	cellular metabolic process;cellular nitrogen compound metabolic process;cellular process;macromolecule metabolic process;metabolic process;mRNA metabolic process;mRNA processing;nitrogen compound metabolic process;nucleobase-containing compound metabolic process;primary metabolic process;response to biotic stimulus;response to endogenous stimulus;response to stimulus;RNA metabolic process;RNA pro…		CSTF_C;CSTF2_hinge;RRM_1	IPR000504;IPR012677;IPR025742;IPR026896	CSTF_C;CSTF2_hinge;Nucleotide-bd_a/b_plait;RRM_dom	PS50102	RRM			PF00076;PF14304;PF14327		PD_CE	7	7	7	28.3	28.3	28.3	31.457		0	34.347	980740000	12	0.419998	0.547299	0.00039616	-7.16318	C8V2S8
19.5178	19.5649	19.645	19.5007	19.3083	19.2449	19.3695	19.4093	19.3037	19.2805	19.3635	C8V2T3	ANIA_06069		+	0.224096	2.44973		-0.0171094	0.13527	adenyl nucleotide binding;adenyl ribonucleotide binding;ATP binding;binding;catalytic activity;DNA binding;DNA ligase (ATP) activity;DNA ligase activity;ligase activity;ligase activity, forming phosphoric ester bonds;nucleic acid binding;nucleotide binding;purine nucleotide binding;purine ribonucleoside triphosphate binding;purine ribonucleotide binding;ribonucleotide binding	biological regulation;biosynthetic process;cellular component organization;cellular metabolic process;cellular nitrogen compound metabolic process;cellular process;chromosome organization;DNA metabolic process;DNA recombination;DNA repair;homeostatic process;macromolecule metabolic process;metabolic process;nitrogen compound metabolic process;nucleobase-containing compound metabolic process;organ…		DNA_ligase_A_C;DNA_ligase_A_M;DNA_ligase_A_N	IPR000977;IPR012308;IPR012309;IPR012310;IPR012340;IPR016059	DNA_ligase_ATP-dep;DNA_ligase_ATP-dep_C;DNA_ligase_ATP-dep_cent;DNA_ligase_ATP-dep_CS;DNA_ligase_ATP-dep_N;NA-bd_OB-fold	PS00333;PS00697;PS50160	DNA_LIGASE_A1;DNA_LIGASE_A2;DNA_LIGASE_A3	DNA ligase		PF01068;PF04675;PF04679	MM_CE		29	29	29	29.4	29.4	29.4	102.49		0	70.216	3045900000	36	0.00158768	4.63733	0.777943	-0.361686	C8V2T3
14.0777	14.0072	13.8049	14.1202	14.5835	14.487	14.3424	14.315	14.0486	14.0483	14.0843	C8V2U0	ANIA_06062		+	-0.429501	2.41607	+	-0.371552	2.36257	binding;cation binding;ion binding;metal ion binding;nucleic acid binding transcription factor activity;sequence-specific DNA binding RNA polymerase II transcription factor activity;sequence-specific DNA binding transcription factor activity;transition metal ion binding;zinc ion binding				IPR001138	Zn2-C6_fun-type_DNA-bd						MM_CE	PD_CE	2	2	2	2.7	2.7	2.7	72.088		0	4.3903	34157000	2	0.00162312	-4.56356	0.00171542	-4.93538	C8V2U0
22.3414	22.421	22.2235	22.1735	22.0294	22.1146	21.9978	22.1485	22.7704	22.4944	22.4209	C8V2U2	ANIA_06060		+	0.217254	1.77139	+	0.48935	2.37768	binding;nucleic acid binding;RNA binding			eIF_4G1;MIF4G	IPR003890;IPR016021;IPR016024;IPR022745	ARM-type_fold;eIF4G1_eIF4E-bd;MIF4G-like_typ-3;MIF4-like_typ_1/2/3					PF02854;PF12152	MM_CE	PD_CE	86	86	86	54.6	54.6	54.6	162.88		0	323.31	33297000000	174	0.00556364	3.275	0.00169677	4.97575	C8V2U2
18.8752	18.4946	18.8331	18.5603	18.5145	18.477	18.4456	18.3327	18.4928	18.1936	18.1538	C8V2U3	ANIA_06059		+	0.248345	1.27472		-0.162381	0.774166				TB2_DP1_HVA22	IPR004345	TB2_DP1_HVA22			Protein YOP1		PF03134	MM_CE		7	7	7	21.9	21.9	21.9	35.973		0	46.885	2729200000	10	0.0175909	2.40238	0.0995898	-1.61051	C8V2U3
17.298	17.2876	17.1595	17.3486	17.2781	17.212	17.2532	17.1605	17.2619	17.4136	17.3264	C8V2V9	ANIA_06044			0.0474815	0.445567	+	0.108036	1.13642	adenyl nucleotide binding;adenyl ribonucleotide binding;ATP binding;binding;catalytic activity;kinase activity;nucleotide binding;phosphotransferase activity, alcohol group as acceptor;protein kinase activity;purine nucleotide binding;purine ribonucleoside triphosphate binding;purine ribonucleotide binding;ribonucleotide binding;transferase activity;transferase activity, transferring phosphorus-c…	biological regulation;cellular process;regulation of cell cycle;response to DNA damage stimulus;response to stimulus;response to stress		Pkinase	IPR000719;IPR002290;IPR008271;IPR011009	Kinase-like_dom;Prot_kinase_dom;Ser/Thr_dual-sp_kinase;Ser/Thr_kinase_AS	PS00108;PS50011	PROTEIN_KINASE_DOM;PROTEIN_KINASE_ST			PF00069		PD_CE	9	9	9	19.3	19.3	19.3	52.547		0	24.693	394680000	12	0.186506	0.994335	0.0321573	2.26337	C8V2V9
15.9296	15.8728	16.1113	16.7963	16.683	17.242	16.8617	16.503	17.9997	16.7777	16.6	C8V2X1	ANIA_11533		+	-0.644918	1.295		0.303388	0.305089												MM_CE		5	5	5	75.6	75.6	75.6	8.5043		0	41.947	329130000	8	0.0166498	-2.43669	0.518641	0.734994	C8V2X1
18.4161	17.8352	18.4217	18.1637	18.0346	18.0487	17.9277	17.8581	17.4963	17.4209	17.9533	C8V2X5	ANIA_06898			0.241914	0.830433	+	-0.343774	1.15917		biological regulation;cellular component organization;cellular membrane organization;cellular process;endosome transport;establishment of localization;membrane organization;organelle organization;protein targeting;protein transport;transport;vacuolar transport;vesicle organization;vesicle-mediated transport		Snf7	IPR005024	Snf7_fam					PF03357		PD_CE	8	8	8	35.4	35.4	35.4	25.684		0	196.58	1134400000	9	0.057504	1.66108	0.0302437	-2.30527	C8V2X5
13.3403	13.1174	12.6917	12.8271	12.7976	12.7128	12.4714	12.6495	13.1727	12.4944	12.6302	C8V2Y4	ANIA_10858		+	0.336274	1.08617		0.1079	0.223434				DUF4604	IPR027911	DUF4604					PF15377	MM_CE		1	1	1	9.6	9.6	9.6	18.697		0	8.9085	51832000	2	0.0285411	2.08642	0.633291	0.562889	C8V2Y4
15.8811	15.958	15.934	15.6142	15.8982	15.8229	15.8503	15.9439	16.1955	16.0877	16.3809	C8V2Y5	ANIA_11250			-0.0320179	0.145805	+	0.342498	2.14297	binding;nucleic acid binding;RNA binding	catabolic process;cellular metabolic process;cellular nitrogen compound metabolic process;cellular process;macromolecule metabolic process;metabolic process;mRNA metabolic process;nitrogen compound metabolic process;nucleobase-containing compound metabolic process;primary metabolic process;RNA catabolic process;RNA metabolic process;RNA processing;rRNA processing;tRNA metabolic process		ECR1_N;EXOSC1	IPR012340;IPR019495;IPR022967;IPR025721	EXOSC1;Exosome_cplx_N_dom;NA-bd_OB-fold;S1_dom					PF10447;PF14382		PD_CE	5	5	5	25.2	25.2	25.2	26.262		0	17.213	316230000	6	0.563398	-0.383149	0.0028709	4.374	C8V2Y5
19.0285	18.9159	19.0555	19.505	20.0745	20.2162	20.2392	20.2034	18.8205	19.0547	18.6956	C8V2Y6	ANIA_12408		+	-1.05713	3.63993	+	-1.32637	4.39607	binding;protein anchor;protein binding	autophagy;catabolic process;cell communication;cellular component assembly;cellular component organization;cellular membrane organization;cellular metabolic process;cellular process;membrane docking;membrane fusion;membrane organization;metabolic process;organelle assembly;organelle inheritance;organelle organization;response to external stimulus;response to extracellular stimulus;response to sta…		Arm	IPR000225;IPR011989;IPR016024	Armadillo;ARM-like;ARM-type_fold	PS50176	ARM_REPEAT			PF00514	MM_CE	PD_CE	18	18	18	33.7	33.7	33.7	62.612		0	229.7	10967000000	36	0.000365128	-7.8303	9.21053e-05	-13.4842	C8V2Y6
17.9532	17.987	18.0597	18.2137	18.533	18.5361	18.4601	18.5006	17.7004	17.7929	17.9046	C8V2Y7	ANIA_06908		+	-0.454063	3.53832	+	-0.708169	4.35129	acid-amino acid ligase activity;catalytic activity;ligase activity;ligase activity, forming carbon-nitrogen bonds;small conjugating protein ligase activity;ubiquitin-protein ligase activity;ubiquitin-ubiquitin ligase activity	biological regulation;cellular metabolic process;cellular process;macromolecule metabolic process;macromolecule modification;metabolic process;primary metabolic process;protein metabolic process;protein modification by small protein conjugation or removal;protein modification process;regulation of cell cycle;regulation of mitotic cell cycle;regulation of organelle organization		FHA	IPR000253;IPR008984	FHA_dom;SMAD_FHA_domain	PS50006	FHA_DOMAIN			PF00498	MM_CE	PD_CE	11	11	11	21.8	21.8	21.8	60.066		0	41.089	1105900000	14	0.000396226	-7.50492	8.72274e-05	-13.2024	C8V2Y7
15.5009	15.581	15.634	15.5217	15.5712	15.5207	15.5301	15.6467	15.5225	15.5359	15.6146	C8V2Y9	ANIA_06910			-0.00780034	0.0668218		-0.00950662	0.0818195														3	3	3	12.1	12.1	12.1	27.013		0	6.1948	84030000	3	0.77371	-0.187579	0.866231	-0.22853	C8V2Y9
19.1781	19.1268	19.0637	19.2137	19.312	19.3442	19.328	19.3542	18.8967	18.9087	18.9608	C8V2Z0	ANIA_06911		+	-0.189	2.85024	+	-0.412523	5.32842	actin binding;binding;cytoskeletal protein binding;lipid binding;phosphatidylinositol binding;phospholipid binding;protein binding	biological regulation;cellular component organization;cellular membrane organization;cellular process;endosome transport;establishment of localization;Golgi vesicle transport;membrane fusion;membrane organization;organelle organization;protein targeting;protein transport;regulation of organelle organization;regulation of transport;transport;vacuolar transport;vacuole organization;vesicle-mediated…		Vps16_C;Vps16_N	IPR006925;IPR006926;IPR015943;IPR016534;IPR017986	VPS16;Vps16_C;Vps16_N;WD40/YVTN_repeat-like_dom;WD40_repeat_dom					PF04840;PF04841	MM_CE	PD_CE	21	21	21	23.3	23.3	23.3	93.283		0	71.076	2452000000	31	0.000723264	-5.57599	0	-20.8553	C8V2Z0
19.6847	19.9225	19.7437	19.8605	20.1096	20.1176	20.2268	20.1474	19.882	19.8236	19.6868	C8V309	ANIA_06036		+	-0.347496	2.92252	+	-0.352835	2.76653	binding;nucleotide binding	cellular metabolic process;cellular nitrogen compound metabolic process;cellular process;macromolecule metabolic process;metabolic process;mRNA metabolic process;mRNA processing;nitrogen compound metabolic process;nucleobase-containing compound metabolic process;primary metabolic process;RNA metabolic process;RNA processing		PWI	IPR002483;IPR012677	Nucleotide-bd_a/b_plait;PWI_dom	PS51025	PWI			PF01480	MM_CE	PD_CE	28	28	28	31.6	31.6	31.6	84.752		0	104.12	5219600000	40	0.000683841	-5.75842	0.000720911	-6.10193	C8V309
16.1476	16.3218	15.8728	16.2726	15.9451	16.4443	16.0566	16.3493	15.7044	16.0205	15.6976	C8V311	ANIA_06034			-0.0451117	0.107341	+	-0.391334	1.189		cellular process;establishment of localization;protein targeting;protein transport;transmembrane transport;transport		TIM21	IPR013261	Tim21					PF08294		PD_CE	3	3	3	13	13	13	22.565		0.0011455	2.7364	125240000	3	0.660453	-0.290772	0.0277124	-2.36045	C8V311
20.2421	20.2142	19.9363	20.1928	20.0395	20.0997	19.9969	20.0355	20.1382	20.0021	19.8236	C8V312	ANIA_06033			0.103421	0.675894		-0.0549157	0.280561	binding;cation binding;ion binding;metal ion binding;transition metal ion binding;zinc ion binding	biological regulation;cellular component organization;cellular process;establishment of localization;Golgi vesicle transport;organelle organization;transport;vesicle organization;vesicle-mediated transport		ArfGap	IPR001164	ArfGAP	PS50115	ARFGAP			PF01412			25	25	25	44.4	44.4	44.4	52.922		0	214.88	9922200000	41	0.0903744	1.40045	0.550957	-0.684433	C8V312
20.0384	19.6348	19.9766	20.5315	20.4315	20.4792	20.3764	20.2071	19.4932	19.4547	19.3502	C8V321	ANIA_06024			-0.328235	0.848704	+	-0.940808	4.1396	antioxidant activity;catalytic activity;glutathione peroxidase activity;glutathione transferase activity;oxidoreductase activity;oxidoreductase activity, acting on peroxide as acceptor;peroxidase activity;transferase activity;transferase activity, transferring alkyl or aryl (other than methyl) groups	cellular process;metabolic process;response to chemical stimulus;response to oxidative stress;response to stimulus;response to stress		GST_C_3	IPR004045;IPR004046;IPR010987;IPR012336	Glutathione_S-Trfase_N;Glutathione-S-Trfase_C-like;GST_C;Thioredoxin-like_fold	PS50404;PS50405	GST_CTER;GST_NTER			PF14497		PD_CE	14	14	14	65.2	65.2	65.2	22.977		0	70.985	24807000000	48	0.0546554	-1.69158	6.93069e-05	-11.9444	C8V321
17.5472	17.5881	17.6969	17.3346	17.2033	17.0976	17.1032	17.0722	17.6455	17.6669	18.2318	C8V330	tif35		+	0.422661	2.69695	+	0.729023	2.16954	binding;nucleic acid binding;nucleotide binding;RNA binding;translation factor activity, nucleic acid binding;translation initiation factor activity	biological regulation;cellular component assembly;cellular component organization;cellular macromolecular complex assembly;cellular process;macromolecular complex assembly;regulation of translation;ribonucleoprotein complex assembly;translational initiation		eIF3g;RRM_1	IPR000504;IPR012677;IPR017334;IPR024675	eIF3_g;eIF3g_N;Nucleotide-bd_a/b_plait;RRM_dom	PS50102	RRM	Eukaryotic translation initiation factor 3 subunit G		PF00076;PF12353	MM_CE	PD_CE	13	13	13	55.4	55.4	55.4	31.556		0	255.18	4485700000	16	0.000975272	5.20283	0.00272444	4.43949	C8V330
19.4868	19.5061	19.5354	20.041	19.7925	19.7914	19.7344	19.7293	18.6114	18.7282	18.6384	C8V333	ANIA_06014			-0.119577	0.389489	+	-1.10257	6.15805	catalytic activity			AMP-binding	IPR000873;IPR020845	AMP-binding_CS;AMP-dep_Synth/Lig	PS00455	AMP_BINDING			PF00501		PD_CE	24	24	24	29.7	29.7	29.7	76.711		0	323.31	21244000000	48	0.225705	-0.889742	0	-30.6396	C8V333
15.1182	15.419	15.7355	15.5127	15.3474	15.4356	15.5663	15.4809	15.4075	15.4337	15.4837	C8V338	ANIA_06009			-0.0112281	0.0283461		-0.0159612	0.101726				DUF2415	IPR001680;IPR015943;IPR017986;IPR019417	DUF2415;WD40/YVTN_repeat-like_dom;WD40_repeat;WD40_repeat_dom					PF10313			2	2	2	2.8	2.8	2.8	82.362		0	5.796	48052000	2	0.898378	-0.0826541	0.834703	-0.279331	C8V338
17.6218	17.5423	17.3456	18.3701	18.0042	18.0146	17.8741	18.0124	17.3241	17.135	16.897	C8V341	ANIA_06005			-0.256364	0.520359	+	-0.857642	3.23661													PD_CE	5	5	5	84.8	84.8	84.8	8.2148		0	251.46	2669400000	8	0.146289	-1.12967	0.000328459	-7.72671	C8V341
18.8905	18.7492	18.3625	18.6518	18.8692	19.2166	18.7304	18.5397	19.0126	19.1057	18.6939	C8V349	ANIA_05997			-0.175502	0.431285		0.0983923	0.192914	binding;nucleic acid binding;RNA binding;structural constituent of ribosome;structural molecule activity	biosynthetic process;cellular metabolic process;cellular process;establishment of localization;macromolecule metabolic process;metabolic process;nuclear transport;nucleobase-containing compound transport;nucleocytoplasmic transport;primary metabolic process;protein metabolic process;translation;transport		Ribosomal_S19	IPR002222;IPR005713;IPR020934;IPR023575	Ribosomal_S19;Ribosomal_S19_CS;Ribosomal_S19_SF;Ribosomal_S19A/S15e	PS00323	RIBOSOMAL_S19			PF00203			8	8	8	31.3	31.3	31.3	20.923		0	29.672	9734900000	28	0.195483	-0.96798	0.6833	0.495375	C8V349
18.1023	18.0939	17.8902	18.0041	18.372	18.3805	18.4722	18.5027	17.4016	17.5525	17.4153	C8V354	ANIA_10866		+	-0.40922	3.34043	+	-0.975367	4.94578	adenyl nucleotide binding;adenyl ribonucleotide binding;ATP binding;binding;nucleotide binding;purine nucleotide binding;purine ribonucleoside triphosphate binding;purine ribonucleotide binding;ribonucleotide binding			Arch_ATPase	IPR011579;IPR027417	ATPase_dom_prok;P-loop_NTPase						MM_CE	PD_CE	8	8	8	17.8	17.8	17.8	52.831		0	20.155	1572100000	19	0.00047619	-6.90331	0	-17.4496	C8V354
18.2489	18.3931	18.5578	19.0663	18.8446	18.9217	18.9441	18.6832	18.0454	18.3501	17.7998	C8V371	ANIA_10864			-0.281907	0.735736	+	-0.783322	2.46324	catalytic activity;hydrolase activity;hydrolase activity, acting on ester bonds;phosphatase activity;phosphoprotein phosphatase activity;phosphoric ester hydrolase activity;protein tyrosine phosphatase activity			Y_phosphatase3;Y_phosphatase3C	IPR000387;IPR016130;IPR025163;IPR026893;IPR029021	Prot-tyrosine_phosphatase-like;Tyr/Dual-sp_Pase;Tyr/Ser_Pase_IphP-type;Tyr_Pase_AS;Tyr_Phosphatase_C_dom	PS00383;PS50056	TYR_PHOSPHATASE_1;TYR_PHOSPHATASE_2			PF13350		PD_CE	8	8	8	30.8	30.8	30.8	31.32		0	59.196	3869900000	19	0.0751898	-1.50205	0.00144619	-5.20886	C8V371
18.5693	18.6977	17.9686	18.6826	17.5165	17.5881	17.4317	17.6201	17.5902	17.5131	17.4975	C8V373	ANIA_10863		+	0.940485	2.73444		-0.00547059	0.0340323	catalytic activity;oxidoreductase activity;oxidoreductase activity, acting on the CH-NH2 group of donors;oxidoreductase activity, acting on the CH-NH2 group of donors, oxygen as acceptor			DAO	IPR006076;IPR016040;IPR023209	D-aa_oxidase;FAD-dep_OxRdtase;NAD(P)-bd_dom					PF01266	MM_CE		11	11	11	27.7	27.7	27.7	38.431		0	37.324	4657600000	24	0.000936645	5.29242	0.94327	-0.0994709	C8V373
19.4501	19.3032	19.3711	19.6941	19.3299	19.3599	19.2818	19.2574	19.2106	19.1483	19.3135	C8V3A3;REV__Q5BB21	ANIA_05991			0.147386	0.83439		-0.0831094	0.827505	adenyl nucleotide binding;adenyl ribonucleotide binding;ATP binding;ATPase activity;ATPase activity, coupled;binding;catalytic activity;hydrolase activity;hydrolase activity, acting on acid anhydrides;hydrolase activity, acting on acid anhydrides, in phosphorus-containing anhydrides;nucleoside-triphosphatase activity;nucleotide binding;purine nucleotide binding;purine ribonucleoside triphosphate …	cellular ketone metabolic process;cellular lipid metabolic process;cellular metabolic process;cellular process;lipid metabolic process;macromolecule metabolic process;metabolic process;organic acid metabolic process;primary metabolic process;small molecule metabolic process		AAA;PEX-1N	IPR003593;IPR003959;IPR003960;IPR009010;IPR015342;IPR025653;IPR027417;IPR029067	AAA+_ATPase;Asp_de-COase-like_dom;ATPase_AAA_core;ATPase_AAA_CS;CDC48_domain_2-like;Pex1;PEX-1N;P-loop_NTPase	PS00674	AAA			PF00004;PF09262;PF17862			30	30	30	25.6	25.6	25.6	131.36		0	188.02	2092500000	37	0.0568647	1.66769	0.0828176	-1.70579	C8V3A3
18.9067	18.7443	18.9468	18.9872	19.195	19.2759	19.2473	19.4009	19.2359	19.3681	18.9999	C8V3A5	ANIA_05989		+	-0.383548	2.84676		-0.0784782	0.315128					IPR016040	NAD(P)-bd_dom					PF13460	MM_CE		11	11	11	46.1	46.1	46.1	30.035		0	63.397	5637000000	26	0.000720483	-5.56732	0.506082	-0.755442	C8V3A5
12.9389	12.972	14.3243	13.3348	16.8225	15.5594	16.4958	16.3653	12.828	13.347	13.0389	C8V3A9	ANIA_05985		+	-2.91829	3.35521	+	-3.23948	3.65718	binding;catalytic activity;cation binding;inositol oxygenase activity;ion binding;iron ion binding;metal ion binding;oxidoreductase activity;oxidoreductase activity, acting on single donors with incorporation of molecular oxygen;transition metal ion binding	alcohol metabolic process;carbohydrate metabolic process;catabolic process;cellular metabolic process;cellular process;metabolic process;primary metabolic process;small molecule metabolic process		DUF706	IPR007828	Inositol_oxygenase					PF05153	MM_CE	PD_CE	1	1	1	3.2	3.2	3.2	36.211		0.0008274	3.027	70378000	2	0.000481328	-6.94682	0.000201439	-9.48463	C8V3A9
20.0033	20.1354	20.1561	20.1493	20.2798	20.2923	20.2872	20.2951	19.8542	19.963	19.8333	C8V3B2	ANIA_05982		+	-0.177569	2.5631	+	-0.405097	4.1428	adenyl nucleotide binding;adenyl ribonucleotide binding;ATP binding;binding;catalytic activity;drug binding;kinase activity;nucleotide binding;phosphotransferase activity, alcohol group as acceptor;purine nucleotide binding;purine ribonucleoside triphosphate binding;purine ribonucleotide binding;ribonucleotide binding;transferase activity;transferase activity, transferring phosphorus-containing g…	biological regulation;cellular metabolic process;cellular nitrogen compound metabolic process;cellular process;DNA metabolic process;DNA recombination;DNA repair;macromolecule metabolic process;metabolic process;nitrogen compound metabolic process;nucleobase-containing compound metabolic process;primary metabolic process;response to DNA damage stimulus;response to stimulus;response to stress;sign…		DUF3385;FAT;FATC;PI3_PI4_kinase;Rapamycin_bind	IPR000403;IPR003151;IPR003152;IPR009076;IPR011009;IPR011989;IPR014009;IPR016024;IPR018936;IPR021133;IPR024585	ARM-like;ARM-type_fold;DUF3385_TOR;FATC;HEAT_type_2;Kinase-like_dom;PI3/4_kinase_cat_dom;PI3/4_kinase_CS;PIK_FAT;PIK-rel_kinase_FAT;Rapamycin-bd_dom	PS00915;PS50077;PS50290;PS51189;PS51190	FAT;FATC;HEAT_REPEAT;PI3_4_KINASE_1;PI3_4_KINASE_3			PF00454;PF02259;PF02260;PF08771;PF11865	MM_CE	PD_CE	44	44	44	20.5	20.5	20.5	269.51		0	271.42	4650500000	69	0.00123766	-4.89136	6.96517e-05	-11.9626	C8V3B2
16.8181	16.5593	16.8314	17.3694	18.6343	18.6797	18.5829	18.572	16.6891	16.8171	16.615	C8V3C1	ANIA_10764		+	-1.72268	4.24049	+	-1.91016	6.33324	catalytic activity			ECH	IPR001753;IPR018376;IPR029045	ClpP/crotonase-like_dom;Crotonase_core_superfam;Enoyl-CoA_hyd/isom_CS	PS00166	ENOYL_COA_HYDRATASE			PF00378	MM_CE	PD_CE	5	5	5	18	18	18	29.566		0	11.2	597010000	9	0.000204545	-10.0134	0	-33.2251	C8V3C1
18.6826	18.8364	18.7428	18.7534	18.7737	18.8415	18.7685	18.8345	18.655	18.7394	18.9695	C8V3C2	ANIA_10763			-0.0507431	0.656585		-0.0165585	0.0717334	acetyltransferase activity;binding;catalytic activity;cation binding;chromatin binding;DNA binding;histone acetyltransferase activity;ion binding;lipid binding;lysine N-acetyltransferase activity;metal ion binding;N-acetyltransferase activity;N-acyltransferase activity;nucleic acid binding;phosphatidylserine binding;phospholipid binding;protein binding transcription factor activity;transcription …	biological regulation;cellular component assembly;cellular component organization;cellular metabolic process;cellular process;chromatin modification;chromatin organization;chromosome organization;gene silencing;histone modification;macromolecule metabolic process;macromolecule modification;metabolic process;organelle organization;peptidyl-amino acid modification;primary metabolic process;protein …		Myb_DNA-binding;SWIRM;ZZ	IPR000433;IPR001005;IPR007526;IPR009057;IPR016827;IPR017884	Ada2/TADA2;Homeodomain-like;SANT/Myb;SANT_dom;SWIRM;Znf_ZZ	PS01357;PS50135;PS50934;PS51293	SANT;SWIRM;ZF_ZZ_1;ZF_ZZ_2			PF00249;PF00569;PF04433			12	12	12	24.4	24.4	24.4	58.568		0	83.747	966100000	18	0.0955976	-1.36741	0.883389	-0.202176	C8V3C2
20.6951	20.7634	20.6785	20.7204	20.6822	20.7091	20.691	20.7891	20.9271	20.9693	20.7139	C8V3C4	ANIA_05972			-0.00352144	0.0399211	+	0.152251	1.05235	structural molecule activity	cellular process;endosome transport;establishment of localization;Golgi vesicle transport;protein transport;transport;vacuolar transport;vesicle-mediated transport		Coatomer_WDAD;WD40	IPR001680;IPR006692;IPR015943;IPR016453;IPR017986;IPR020472	Coatomer_WD-assoc_reg;COPB2;G-protein_beta_WD-40_rep;WD40/YVTN_repeat-like_dom;WD40_repeat;WD40_repeat_dom	PS50082;PS50294	WD_REPEATS_2;WD_REPEATS_REGION			PF00400;PF04053		PD_CE	26	26	26	29.8	29.8	29.8	94.558		0	247.15	24862000000	65	0.85936	-0.115027	0.0411143	2.1098	C8V3C4
19.4938	19.6195	19.5592	19.6382	19.7763	19.8484	19.7894	19.9111	19.7891	19.7241	19.6908	C8V3C6	ANIA_05970		+	-0.253646	2.87787	+	-0.0966371	1.10537	catalytic activity;intramolecular oxidoreductase activity;intramolecular oxidoreductase activity, interconverting keto- and enol-groups;intramolecular oxidoreductase activity, transposing S-S bonds;isomerase activity;protein disulfide isomerase activity	biological regulation;cellular homeostasis;cellular metabolic process;cellular process;homeostatic process;macromolecule metabolic process;metabolic process;primary metabolic process;protein folding;protein metabolic process;response to stimulus;response to stress		Thioredoxin	IPR012336;IPR013766	Thioredoxin_domain;Thioredoxin-like_fold	PS51352	THIOREDOXIN_2			PF00085	MM_CE	PD_CE	22	22	22	31.5	31.5	31.5	79.853		0	130.01	6364200000	37	0.000716384	-5.64522	0.0352647	-2.20642	C8V3C6
16.6823	16.5403	16.9646	16.4069	16.3199	16.3579	16.4311	16.239	16.6427	16.7814	17.1017	C8V3C7	ANIA_05969		+	0.311546	1.31691	+	0.504925	2.02888				QCR10	IPR019182	Cytochrome_b-c1_su10_fun					PF09796	MM_CE	PD_CE	4	4	4	47.3	47.3	47.3	9.9392		0	44.602	9215800000	12	0.0157586	2.47385	0.00374512	4.09981	C8V3C7
20.2116	20.2816	20.3334	20.2248	20.3356	20.4525	20.4099	20.3053	20.8089	20.6565	20.6822	C8V3D8	ANIA_09468		+	-0.112959	1.37813	+	0.340082	2.75449	structural constituent of ribosome;structural molecule activity	biosynthetic process;cellular metabolic process;cellular process;macromolecule metabolic process;metabolic process;primary metabolic process;protein metabolic process;translation		Ribosomal_S9	IPR000754;IPR014721;IPR020568;IPR020574	Ribosomal_S5_D2-typ_fold;Ribosomal_S5_D2-typ_fold_subgr;Ribosomal_S9;Ribosomal_S9_CS	PS00360	RIBOSOMAL_S9			PF00380	MM_CE	PD_CE	12	12	12	72.7	72.7	72.7	15.94		0	120.87	56356000000	57	0.0135694	-2.57827	0.000725363	6.06436	C8V3D8
18.3102	18.5755	18.2539	18.4568	18.4827	18.5024	18.3632	18.4263	18.1478	18.3737	18.3003	C8V3E2	ANIA_05959			-0.0445447	0.226219	+	-0.169718	1.28399	catalytic activity;oxidoreductase activity;oxidoreductase activity, acting on the CH-CH group of donors;oxidoreductase activity, acting on the CH-CH group of donors, NAD or NADP as acceptor;prephenate dehydrogenase (NADP+) activity;prephenate dehydrogenase activity	amine metabolic process;biosynthetic process;cellular amino acid metabolic process;cellular aromatic compound metabolic process;cellular ketone metabolic process;cellular metabolic process;cellular nitrogen compound metabolic process;cellular process;metabolic process;nitrogen compound metabolic process;organic acid metabolic process;primary metabolic process;small molecule metabolic process		PDH	IPR003099;IPR008927;IPR012385;IPR016040	6-PGluconate_DH_C-like;NAD(P)-bd_dom;Prephen_DH;Prephenate_DH_fun	PS51176	PDH_ADH			PF02153		PD_CE	9	9	9	19.5	19.5	19.5	49.19		0	66.713	2719100000	14	0.408461	-0.562749	0.0214238	-2.53831	C8V3E2
19.0975	19.0137	18.6923	19.4052	19.7044	19.7357	19.603	19.7506	19.1601	19.102	18.782	C8V3E3	ANIA_10756		+	-0.646238	2.29327	+	-0.683703	2.87698		biological regulation;biosynthetic process;cell wall organization;cell wall organization or biogenesis;cellular cell wall organization;cellular cell wall organization or biogenesis;cellular component organization;cellular lipid metabolic process;cellular metabolic process;cellular process;cytoskeleton organization;establishment or maintenance of cell polarity;external encapsulating structure orga…		HR1;RasGEF_N_2;RICTOR_M;RICTOR_N;RICTOR_V	IPR011072;IPR011989;IPR016024;IPR028267;IPR028268;IPR029451;IPR029452;IPR029453	ARM-like;ARM-type_fold;HR1_rho-bd;Pianissimo_fam;Pianissimo_N;Rictor_IV;RICTOR_M;RICTOR_V					PF02185;PF14663;PF14664;PF14666;PF14668	MM_CE	PD_CE	17	17	17	13.9	13.9	13.9	146.47		0	65.299	3715500000	23	0.00204677	-4.30048	0.000625384	-6.45548	C8V3E3
17.1487	17.1334	17.2536	17.2627	17.4754	17.4726	17.4708	17.3553	17.126	17.0708	16.9295	C8V3E4	ANIA_10758		+	-0.24389	2.78879	+	-0.401386	2.9453				AAR2	IPR007946	AAR2					PF05282	MM_CE	PD_CE	11	11	11	24	24	24	53.38		0	53.182	641290000	14	0.000744333	-5.4242	0.000596685	-6.6824	C8V3E4
NaN	NaN	NaN	NaN	NaN	NaN	NaN	NaN	NaN	NaN	NaN	C8V3F8	ANIA_11538			0	NaN		0	NaN														1	1	1	14.3	14.3	14.3	7.3835	+	1	-2	0	0	1	NaN	1	NaN	C8V3F8
15.198	15.5118	15.3386	15.2874	15.0421	15.2128	15.1948	15.2082	15.6388	15.6722	15.9387	C8V3G5	ANIA_05953		+	0.169479	1.14304	+	0.58543	2.8266	binding;cation binding;ion binding;iron ion binding;iron-sulfur cluster binding;metal cluster binding;metal ion binding;structural molecule activity;transition metal ion binding	biosynthetic process;cellular amide metabolic process;cellular ketone metabolic process;cellular metabolic process;cellular nitrogen compound metabolic process;cellular process;cofactor metabolic process;heterocycle metabolic process;metabolic process;nitrogen compound metabolic process;organic acid metabolic process;small molecule metabolic process;sulfur compound metabolic process;vitamin metab…		Fe-S_biosyn	IPR000361;IPR016092	FeS_biogenesis;FeS_cluster_insertion					PF01521	MM_CE	PD_CE	3	3	3	21	21	21	25.07		0	52.654	244770000	6	0.0240915	2.18124	0.00065707	6.29219	C8V3G5
19.0909	19.2222	19.2317	19.1867	19.4001	19.4091	19.3601	19.3601	18.94	19.0338	19.0772	C8V3G8	ANIA_05950		+	-0.19949	2.92018	+	-0.36537	3.73117	protein transporter activity;substrate-specific transporter activity;transporter activity	cellular process;establishment of localization;protein transport;transport;vesicle-mediated transport		Adaptin_N	IPR002553;IPR011989;IPR016024;IPR016342;IPR026739	AP_beta;AP_complex_bsu_1_2_4;ARM-like;ARM-type_fold;Clathrin/coatomer_adapt-like_N			AP complex subunit beta		PF01602	MM_CE	PD_CE	14	14	14	18.8	18.8	18.8	79.73		0	33.442	1921500000	22	0.000682642	-5.75244	0.000140652	-9.82869	C8V3G8
15.8078	15.9325	15.3619	15.4761	14.6627	14.6523	14.5651	14.55	15.7247	15.6293	15.5457	C8V3H1	ANIA_10761		+	1.03704	3.5444	+	1.02574	5.07741	binding;DNA binding;nucleic acid binding	biological regulation		CSD	IPR002059;IPR012340	CSP_DNA-bd;NA-bd_OB-fold					PF00313	MM_CE	PD_CE	5	5	5	45.9	45.9	45.9	12.109		0	46.613	793580000	3	0.000397351	7.52408	0	18.5549	C8V3H1
18.4995	18.7729	18.8675	18.505	18.3841	18.2839	18.4003	18.492	18.8169	18.9794	18.9722	C8V3I8	ANIA_10755		+	0.271127	1.40914	+	0.532785	3.29031	3'-5' exonuclease activity;binding;catalytic activity;chromatin binding;DNA binding;DNA polymerase activity;DNA replication origin binding;DNA-directed DNA polymerase activity;exonuclease activity;hydrolase activity;hydrolase activity, acting on ester bonds;nuclease activity;nucleic acid binding;nucleoside binding;nucleotide binding;nucleotidyltransferase activity;sequence-specific DNA binding;si…	biological regulation;biosynthetic process;cellular component organization;cellular metabolic process;cellular nitrogen compound metabolic process;cellular process;chromosome organization;DNA metabolic process;DNA repair;DNA replication;homeostatic process;macromolecule metabolic process;metabolic process;nitrogen compound metabolic process;nucleobase-containing compound metabolic process;organel…		DNA_pol_alpha_N;DNA_pol_B;DNA_pol_B_exo1;zf-DNA_Pol	IPR006133;IPR006134;IPR006172;IPR012337;IPR015088;IPR017964;IPR023211;IPR024647;IPR029702	DNA_pol_a_cat_su_N;DNA_pol_palm_dom;DNA-dir_DNA_pol_B;DNA-dir_DNA_pol_B_CS;DNA-dir_DNA_pol_B_exonuc;DNA-dir_DNA_pol_B_multi_dom;POLA/Pol1;RNaseH-like_dom;Znf_DNA-dir_DNA_pol_B_alpha	PS00116	DNA_POLYMERASE_B	DNA polymerase		PF00136;PF03104;PF08996;PF12254	MM_CE	PD_CE	17	17	17	12.3	12.3	12.3	164.97		0	112.29	920760000	18	0.0123641	2.63149	0.000323754	7.93376	C8V3I8
18.2347	18.2148	18.1581	18.2739	17.8462	17.7849	17.7251	17.7325	17.9619	17.9514	18.0853	C8V3I9	ANIA_10762		+	0.448211	4.71683	+	0.227379	2.25208	catalytic activity;hydrolase activity;hydrolase activity, acting on carbon-nitrogen (but not peptide) bonds;kinase activity;phosphomethylpyrimidine kinase activity;phosphotransferase activity, phosphate group as acceptor;thiaminase activity;transferase activity;transferase activity, transferring phosphorus-containing groups	biosynthetic process;cellular aromatic compound metabolic process;cellular metabolic process;cellular nitrogen compound metabolic process;cellular process;heterocycle metabolic process;metabolic process;nitrogen compound metabolic process;small molecule metabolic process;sulfur compound metabolic process;vitamin metabolic process		Phos_pyr_kin;TENA_THI-4	IPR004305;IPR004399;IPR013749;IPR016084;IPR027574;IPR029056	Haem_Oase-like_multi-hlx;HMP/HMP-P_kinase;PM/HMP-P_kinase-1;Ribokinase-like;Thiaminase_II;Thiaminase-2/PQQC					PF03070;PF08543	MM_CE	PD_CE	9	9	9	21	21	21	55.416		0	43.232	1616500000	16	0	12.1174	0.00223418	4.64713	C8V3I9
18.7288	18.7225	19.0263	18.6793	18.2466	18.1508	18.1481	18.2394	18.5468	18.3485	18.7353	C8V3J2	ANIA_05929		+	0.592992	3.38622	+	0.34733	1.77013	binding;cation binding;ion binding;metal ion binding;nucleic acid binding				IPR007087;IPR013087;IPR015880	Znf_C2H2;Znf_C2H2/integrase_DNA-bd;Znf_C2H2-like	PS00028;PS50157	ZINC_FINGER_C2H2_1;ZINC_FINGER_C2H2_2				MM_CE	PD_CE	10	10	9	22.8	22.8	21.1	44.952		0	290.09	6698500000	19	0.000451613	7.03888	0.00674155	3.51677	C8V3J2
18.6337	18.5931	18.6007	18.6756	18.6109	18.6719	18.821	18.7056	18.2218	18.2427	18.0561	C8V3J5	ANIA_05926			-0.0765743	0.791605	+	-0.528789	3.13725				Yip1	IPR006977	Yip1			Protein YIP		PF04893		PD_CE	6	6	6	21.2	21.2	21.2	32.425		0	107.45	1980400000	14	0.0644728	-1.59608	0.00037605	-7.35593	C8V3J5
19.7295	19.7319	19.5142	19.6732	19.5854	19.4498	19.473	19.4966	19.5109	19.5044	19.5893	C8V3J6	ANIA_10754		+	0.16098	1.46208		0.0336555	0.339514		biological regulation;cellular localization;cellular process;establishment of localization;localization;nuclear transport;nucleocytoplasmic transport;protein targeting;protein transport;regulation of transport;response to chemical stimulus;response to oxidative stress;response to stimulus;response to stress;ribosomal subunit export from nucleus;transport		Ran_BP1	IPR000156;IPR011993	PH_like_dom;Ran_bind_dom	PS50196	RANBD1			PF00638	MM_CE		22	22	22	52.9	52.9	52.9	52.319		0	323.31	4773700000	35	0.0108865	2.72293	0.47496	0.804573	C8V3J6
17.794	17.9193	17.7241	17.7873	17.2988	17.3561	17.2289	17.3154	17.6466	17.6317	17.7031	C8V3K1	ANIA_10753		+	0.506341	4.3333	+	0.360668	3.75515	catalytic activity;hydroxymethyl-, formyl- and related transferase activity;phosphoribosylglycinamide formyltransferase activity;transferase activity;transferase activity, transferring one-carbon groups	biosynthetic process;cellular aromatic compound metabolic process;cellular metabolic process;cellular nitrogen compound metabolic process;cellular process;heterocycle metabolic process;metabolic process;nitrogen compound metabolic process;nucleobase-containing compound metabolic process;nucleobase-containing small molecule metabolic process;nucleotide metabolic process;pigment metabolic process;p…		Formyl_trans_N	IPR002376;IPR004607	Formyl_transf_N;PurN_trans					PF00551	MM_CE	PD_CE	9	9	9	42.5	42.5	42.5	23.896		0	62.821	3795300000	12	8.43882e-05	10.395	0.00014386	9.94259	C8V3K1
11.9666	12.0837	12.2867	12.2262	12.4944	12.5402	12.6101	12.4604	12.7404	12.3495	12.3752	C8V3K2	ANIA_10760		+	-0.385483	2.56009		-0.0378942	0.125164	binding;cation binding;ion binding;metal ion binding;transition metal ion binding;zinc ion binding			zf-RING_2	IPR001841;IPR013083	Znf_RING;Znf_RING/FYVE/PHD	PS50089	ZF_RING_2			PF13639	MM_CE		1	1	1	1.1	1.1	1.1	89.29		0.0055529	2.014	3315200	1	0.00123484	-4.88451	0.795826	-0.337269	C8V3K2
19.5957	19.4691	19.4551	19.935	20.2497	20.4495	20.2511	20.4941	20.0031	20.0368	19.7796	C8V3K8	ANIA_05916		+	-0.74738	2.93672	+	-0.421244	2.04275	carbon-oxygen lyase activity;catalytic activity;enoyl-CoA hydratase activity;hydro-lyase activity;lyase activity	amine metabolic process;catabolic process;cellular amino acid metabolic process;cellular ketone metabolic process;cellular lipid metabolic process;cellular metabolic process;cellular nitrogen compound metabolic process;cellular process;lipid metabolic process;metabolic process;nitrogen compound metabolic process;organic acid metabolic process;primary metabolic process;small molecule metabolic pro…		ECH	IPR001753;IPR014748;IPR018376;IPR029045	ClpP/crotonase-like_dom;Crontonase_C;Crotonase_core_superfam;Enoyl-CoA_hyd/isom_CS	PS00166	ENOYL_COA_HYDRATASE			PF00378	MM_CE	PD_CE	18	18	18	57.1	57.1	57.1	30.864		0	98.276	17143000000	50	0.0006899	-5.79477	0.00366378	-4.13255	C8V3K8
17.669	17.7934	17.8509	17.7105	17.7068	17.7315	17.6758	17.8652	17.4502	17.685	17.7082	C8V3K9	ANIA_05915			0.0111027	0.0677907		-0.130387	0.733495		biological regulation;cellular process;establishment of localization;Golgi vesicle transport;transport;vesicle-mediated transport		Rer1	IPR004932	Rer1					PF03248			6	6	6	40.2	40.2	40.2	22.089		0	34.322	1563800000	14	0.770637	0.190127	0.114817	-1.53777	C8V3K9
15.7914	16.6402	16.6884	15.2452	15.2522	14.9866	15.3602	15.2627	15.3738	15.3241	15.296	C8V3N2	ANIA_11067		+	0.875877	1.29965		0.115894	0.546587	binding;coenzyme binding;cofactor binding;NAD binding;NAD+ binding;nucleotide binding			SIR2	IPR003000;IPR026590;IPR026591;IPR029035	DHS-like_NAD/FAD-binding_dom;Sirtuin;Sirtuin_cat_small_dom;Ssirtuin_cat_dom	PS50305	SIRTUIN			PF02146	MM_CE		4	4	4	13.1	13.1	13.1	44.597		0	6.2923	243910000	4	0.0164777	2.44457	0.238904	1.19952	C8V3N2
16.4118	16.4566	15.6593	16.3371	15.5889	15.5515	15.4849	15.6108	16.0113	15.5239	15.7631	C8V3P3	ANIA_08271		+	0.657185	1.87709		0.207081	0.821503	nucleic acid binding transcription factor activity;sequence-specific DNA binding transcription factor activity	biological regulation;cellular homeostasis;cellular ion homeostasis;cellular process;homeostatic process		HLH	IPR011598	bHLH_dom	PS50888	BHLH			PF00010	MM_CE		2	2	2	2.3	2.3	2.3	76.435		0	3.9134	74078000	2	0.00444232	3.47202	0.0844854	1.69507	C8V3P3
19.8976	19.8923	20.0092	19.7086	19.7575	19.8169	19.796	19.8751	20.5208	20.5346	20.6565	C8V3P5	ANIA_08273			0.0655985	0.437986	+	0.759298	4.81201	binding;catalytic activity;cation binding;cation transmembrane transporter activity;hydrogen ion transmembrane transporter activity;inorganic cation transmembrane transporter activity;ion binding;ion transmembrane transporter activity;metal ion binding;monovalent inorganic cation transmembrane transporter activity;oxidoreductase activity;oxidoreductase activity, acting on diphenols and related su…	cellular metabolic process;cellular process;cellular respiration;generation of precursor metabolites and energy;metabolic process		Peptidase_M16;Peptidase_M16_C	IPR007863;IPR011237;IPR011249;IPR011765	Metalloenz_LuxS/M16;Pept_M16_dom;Pept_M16_N;Peptidase_M16_C					PF00675;PF05193		PD_CE	17	17	17	37.3	37.3	37.3	47.764		0	278.66	31694000000	50	0.191097	0.980366	0	16.3919	C8V3P5
19.2387	19.3043	19.5807	18.9852	18.4146	18.2943	18.4118	18.2864	18.6303	18.5261	18.9243	C8V3P6	ANIA_08274		+	0.925437	3.46095	+	0.341784	1.59918	active transmembrane transporter activity;binding;carboxylic acid transmembrane transporter activity;DNA binding;nucleic acid binding;organic acid transmembrane transporter activity;secondary active transmembrane transporter activity;substrate-specific transmembrane transporter activity;substrate-specific transporter activity;transmembrane transporter activity;transporter activity;tricarboxylate …	cellular component organization;cellular process;establishment of localization;ion transport;mitochondrion organization;organelle organization;organic acid transport;transport		Mito_carr	IPR018108;IPR023395	Mitochondrial_sb/sol_carrier;Mt_carrier_dom	PS50920	SOLCAR			PF00153	MM_CE	PD_CE	11	11	11	26.1	26.1	26.1	33.667		0	32.107	21453000000	23	0.000417112	7.26479	0.00974634	3.15748	C8V3P6
16.4775	16.681	16.4099	16.715	17.0037	16.8887	17.0831	16.985	17.1114	16.9031	16.5897	C8V3Q0	ANIA_08278		+	-0.419259	2.58149		-0.122025	0.38866				MARVEL	IPR008253	Marvel					PF01284	MM_CE		2	2	2	9.7	9.7	9.7	17.057		0	5.4881	5566000000	15	0.00123377	-4.93339	0.413956	-0.901514	C8V3Q0
15.3872	15.7061	15.3068	15.5118	14.9092	15.0739	14.557	14.8406	14.7679	14.7453	14.6406	C8V3Q1	ANIA_08279		+	0.632799	2.41851		-0.127237	0.422034	active transmembrane transporter activity;amine transmembrane transporter activity;amino acid transmembrane transporter activity;carboxylic acid transmembrane transporter activity;organic acid transmembrane transporter activity;substrate-specific transmembrane transporter activity;substrate-specific transporter activity;transmembrane transporter activity;transporter activity			AA_permease	IPR002293;IPR004840;IPR004841	AA/rel_permease1;AA-permease/SLC12A_dom;Amoino_acid_permease_CS	PS00218	AMINO_ACID_PERMEASE_1			PF00324	MM_CE		2	2	2	3.6	3.6	3.6	58.352		0	7.5682	56169000	3	0.00162448	4.56888	0.374377	-0.965995	C8V3Q1
19.3697	19.2061	19.1705	20.7492	20.1811	20.3214	20.2071	20.2	19.0453	19.2084	19.195	C8V3Q2	ANIA_08280			-0.60355	0.789603	+	-1.07782	5.09177	catalytic activity;fatty acid ligase activity;ligase activity;ligase activity, forming carbon-sulfur bonds;long-chain fatty acid-CoA ligase activity;medium-chain fatty acid-CoA ligase activity;very long-chain fatty acid-CoA ligase activity	catabolic process;cellular ketone metabolic process;cellular lipid metabolic process;cellular metabolic process;cellular process;establishment of localization;lipid metabolic process;lipid transport;metabolic process;organic acid metabolic process;organic acid transport;primary metabolic process;small molecule metabolic process;transport		AMP-binding	IPR000873;IPR020845	AMP-binding_CS;AMP-dep_Synth/Lig	PS00455	AMP_BINDING			PF00501		PD_CE	21	21	21	33.1	33.1	33.1	77.883		0	105.26	7436900000	40	0.0647374	-1.59272	0	-18.6796	C8V3Q2
16.9605	16.9098	17.167	17.0683	17.1448	17.1264	17.326	17.2912	17.1596	16.9211	17.0462	C8V3Q3	ANIA_08281		+	-0.195689	1.36709	+	-0.179765	1.08192				WW	IPR001202	WW_dom	PS01159;PS50020	WW_DOMAIN_1;WW_DOMAIN_2			PF00397	MM_CE	PD_CE	7	7	7	35.7	35.7	35.7	34.671		0	220.32	820800000	8	0.0138989	-2.55937	0.0375992	-2.16359	C8V3Q3
16.8753	16.9678	17.0203	17.1589	16.9362	17.0416	16.935	16.925	16.6744	16.732	16.9043	C8V3Q7	ANIA_08285			0.0461497	0.295584	+	-0.189184	1.44771	adenyl nucleotide binding;adenyl ribonucleotide binding;ATP binding;binding;catalytic activity;cyclin-dependent protein kinase activating kinase activity;cyclin-dependent protein kinase activity;enzyme activator activity;enzyme regulator activity;kinase activator activity;kinase activity;kinase regulator activity;nucleotide binding;phosphotransferase activity, alcohol group as acceptor;protein ki…	biological regulation;biosynthetic process;cellular localization;cellular metabolic process;cellular nitrogen compound metabolic process;cellular process;localization;macromolecule metabolic process;metabolic process;nitrogen compound metabolic process;nucleobase-containing compound metabolic process;primary metabolic process;regulation of cell cycle;regulation of mitotic cell cycle;RNA metabolic…		Pkinase	IPR000719;IPR008271;IPR011009	Kinase-like_dom;Prot_kinase_dom;Ser/Thr_kinase_AS	PS00108;PS50011	PROTEIN_KINASE_DOM;PROTEIN_KINASE_ST			PF00069		PD_CE	10	9	9	39.2	36.5	36.5	33.526		0	22.966	542800000	10	0.313738	0.70661	0.0140224	-2.85369	C8V3Q7
19.0776	19.1067	19.3382	18.9804	18.8097	18.7922	18.7572	18.7222	18.9757	18.974	19.0068	C8V3Q8	kipA		+	0.355416	2.40679	+	0.215185	3.4876	adenyl nucleotide binding;adenyl ribonucleotide binding;ATP binding;ATPase activity;binding;catalytic activity;cytoskeletal protein binding;hydrolase activity;hydrolase activity, acting on acid anhydrides;hydrolase activity, acting on acid anhydrides, in phosphorus-containing anhydrides;microfilament motor activity;microtubule binding;microtubule motor activity;microtubule plus-end binding;motor …	biological regulation;cellular component movement;cellular component organization;cellular localization;cellular process;cytoskeleton organization;cytoskeleton-dependent intracellular transport;establishment of localization;establishment or maintenance of cell polarity;localization;organelle organization;regulation of organelle organization;transport		Kinesin	IPR001752;IPR019821;IPR027417;IPR027640	Kinesin_motor_CS;Kinesin_motor_dom;Kinesin-like_fam;P-loop_NTPase	PS00411;PS50067	KINESIN_MOTOR_1;KINESIN_MOTOR_2	Kinesin-like protein		PF00225	MM_CE	PD_CE	22	22	22	25.1	25.1	25.1	96.133		0	123.44	850320000	26	0.00171977	4.54335	0.000231924	8.73697	C8V3Q8
17.6824	17.7082	17.6673	17.8894	17.8127	17.7427	17.8274	17.7759	17.3547	17.4703	17.1426	C8V3Q9	ANIA_11072			-0.052855	0.427888	+	-0.467158	2.60149	acylglycerol O-acyltransferase activity;catalytic activity;diacylglycerol O-acyltransferase activity;O-acyltransferase activity;transferase activity;transferase activity, transferring acyl groups;transferase activity, transferring acyl groups other than amino-acyl groups	biosynthetic process;cellular lipid metabolic process;cellular metabolic process;cellular process;glycerol ether metabolic process;lipid metabolic process;localization;metabolic process;primary metabolic process;small molecule metabolic process		DAGAT	IPR007130	DAGAT					PF03982		PD_CE	11	11	11	33.3	33.3	33.3	46.845		0	155.23	2501600000	17	0.197949	-0.961684	0.000946622	-5.6025	C8V3Q9
18.5683	18.5673	18.6562	18.8897	19.0641	19.0795	19.0906	18.9796	18.678	18.6405	18.4212	C8V3R4	ANIA_08291		+	-0.383079	2.51487	+	-0.473541	2.87703	protein transporter activity;substrate-specific transporter activity;transporter activity	cellular process;establishment of localization;Golgi vesicle transport;protein targeting;protein transport;transport;vacuolar transport;vesicle-mediated transport		Adaptin_N	IPR002553;IPR011989;IPR016024;IPR017105	AP3_complex_dsu;ARM-like;ARM-type_fold;Clathrin/coatomer_adapt-like_N			AP-3 complex subunit delta		PF01602	MM_CE	PD_CE	20	20	20	23.8	23.8	23.8	104.46		0	93.573	1265300000	27	0.00148978	-4.78222	0.000625659	-6.45564	C8V3R4
18.2016	18.389	18.2501	18.0775	17.9556	18.0064	17.9517	17.9838	18.5801	18.621	19.0519	C8V3R6	ANIA_08293		+	0.255167	2.09136	+	0.776612	2.76831		cellular metabolic process;cellular nitrogen compound metabolic process;cellular process;macromolecule metabolic process;metabolic process;nitrogen compound metabolic process;nucleobase-containing compound metabolic process;primary metabolic process;RNA metabolic process;RNA processing;rRNA processing		Utp21;WD40	IPR001680;IPR007319;IPR015943;IPR017986;IPR019775	SSU_processome_Utp21;WD40/YVTN_repeat-like_dom;WD40_repeat;WD40_repeat_CS;WD40_repeat_dom	PS00678;PS50082;PS50294	WD_REPEATS_1;WD_REPEATS_2;WD_REPEATS_REGION			PF00400;PF04192	MM_CE	PD_CE	14	14	14	17.2	17.2	17.2	102		0	110.84	716750000	19	0.00278493	3.88721	0.000698697	6.1075	C8V3R6
16.2461	16.3177	16.4259	16.0836	15.3968	15.3589	15.5535	15.3191	15.9573	15.8412	16.244	C8V3R8	ANIA_10537		+	0.861238	4.17661	+	0.607066	2.45391	binding;nucleic acid binding;nucleotide binding			RRM_1;YTH	IPR000504;IPR007275;IPR012677	Nucleotide-bd_a/b_plait;RRM_dom;YTH_domain	PS50102;PS50882	RRM;YTH			PF00076;PF04146	MM_CE	PD_CE	3	3	3	4.8	4.8	4.8	69.914		0	4.8144	75679000	4	0.000188153	9.75813	0.00148333	5.18305	C8V3R8
16.8131	16.9014	17.0317	16.7454	16.8323	16.7683	16.8134	16.8402	16.8798	16.9337	17.1572	C8V3S2	ANIA_11224			0.0593538	0.41041	+	0.176658	1.21124	binding;catalytic activity;double-stranded RNA binding;endonuclease activity;endonuclease activity, active with either ribo- or deoxyribonucleic acids and producing 5'-phosphomonoesters;endoribonuclease activity;endoribonuclease activity, producing 5'-phosphomonoesters;hydrolase activity;hydrolase activity, acting on ester bonds;nuclease activity;nucleic acid binding;ribonuclease activity;ribonuc…	biological regulation;biosynthetic process;catabolic process;cellular component organization;cellular metabolic process;cellular nitrogen compound metabolic process;cellular process;chromatin organization;chromosome organization;macromolecule metabolic process;metabolic process;mRNA metabolic process;mRNA processing;nitrogen compound metabolic process;nucleobase-containing compound metabolic proc…		dsrm;Ribonuclease_3	IPR000999;IPR011907;IPR014720	dsRNA-bd_dom;RNase_III;RNase_III_dom	PS50142	RNASE_3_2			PF00035;PF00636		PD_CE	8	8	8	23.7	23.7	23.7	39.624		0	19.953	354860000	8	0.209795	0.929119	0.0262099	2.40181	C8V3S2
17.3386	17.4188	17.32	17.2709	17.3148	17.257	17.2778	17.2508	17.2442	17.2077	17.2258	C8V3S3	ANIA_11225		+	0.0619507	0.92761	+	-0.0492191	1.29469												MM_CE	PD_CE	8	8	8	17	17	17	57.725		0	17.168	333010000	8	0.0439705	1.82294	0.0208657	-2.55857	C8V3S3
18.2137	18.2751	18.0824	18.4605	18.4704	18.6168	18.4788	18.4612	17.6738	17.755	17.833	C8V3S7	ANIA_10536		+	-0.248887	1.54511	+	-0.752881	4.31064	binding;DNA binding;nucleic acid binding	cellular metabolic process;cellular nitrogen compound metabolic process;cellular process;DNA metabolic process;DNA recombination;DNA repair;macromolecule metabolic process;metabolic process;nitrogen compound metabolic process;nucleobase-containing compound metabolic process;primary metabolic process;response to DNA damage stimulus;response to stimulus;response to stress			IPR014751	XRCC4_C					PF06632	MM_CE	PD_CE	7	7	7	15.5	15.5	15.5	37.988		0	14.724	809340000	10	0.00891614	-2.86797	8.2963e-05	-12.9515	C8V3S7
16.8271	17.0009	16.9851	17.145	16.3983	16.4333	16.4289	16.1248	17.0324	16.8632	17.0507	C8V3U3	ANIA_03665		+	0.643191	3.20629	+	0.635776	2.82639	active transmembrane transporter activity;anion transmembrane transporter activity;inorganic anion transmembrane transporter activity;ion transmembrane transporter activity;secondary active sulfate transmembrane transporter activity;secondary active transmembrane transporter activity;substrate-specific transmembrane transporter activity;substrate-specific transporter activity;sulfate transmembran…			cNMP_binding;STAS;Sulfate_transp	IPR000595;IPR001902;IPR002645;IPR011547;IPR014710;IPR018490	cNMP-bd_dom;cNMP-bd-like;RmlC-like_jellyroll;STAS_dom;Sul_anion_transpt;Sulph_transpt	PS50042;PS50801	CNMP_BINDING_3;STAS			PF00027;PF00916;PF01740	MM_CE	PD_CE	7	7	7	7.3	7.3	7.3	115.6		0	14.496	226530000	8	0.000457814	6.51816	0.000656792	6.29154	C8V3U3
17.0442	17.1319	17.0704	16.808	16.8234	16.8323	16.9854	17.0594	16.7419	16.8382	16.8717	C8V3U7	ANIA_10452			0.0884838	0.429324		-0.107879	0.665937	catalytic activity;hydrolase activity;hydrolase activity, acting on carbon-nitrogen (but not peptide) bonds;hydrolase activity, acting on carbon-nitrogen (but not peptide) bonds, in linear amides	cellular lipid metabolic process;cellular metabolic process;cellular process;lipid metabolic process;metabolic process;primary metabolic process		Ceramidase	IPR008901	Ceramidase					PF05875			4	4	4	11.2	11.2	11.2	37.81		0	9.819	175650000	4	0.19697	0.964346	0.148191	-1.4165	C8V3U7
18.5755	18.6323	18.6323	18.5861	18.3892	18.3985	18.4658	18.4582	18.6917	18.6333	18.6672	C8V3U9	ANIA_10434		+	0.17864	3.43383	+	0.236137	3.45978		biological regulation;cellular metabolic process;cellular nitrogen compound metabolic process;cellular process;DNA metabolic process;DNA repair;macromolecule metabolic process;metabolic process;nitrogen compound metabolic process;nucleobase-containing compound metabolic process;primary metabolic process;regulation of DNA metabolic process;response to DNA damage stimulus;response to stimulus;respo…		BRCT;PTCB-BRCT	IPR001357	BRCT_dom	PS50172	BRCT			PF00533;PF12738;PF16770	MM_CE	PD_CE	16	16	16	18.5	18.5	18.5	94.633		0	51.988	1047600000	18	0.000408734	7.18211	0.000227425	8.61951	C8V3U9
17.1029	17.2141	16.9153	16.9563	17.0167	17.0613	16.9718	16.8532	17.4302	17.3215	17.3881	C8V3V0	TRM8	x		0.0713797	0.379442	+	0.404158	2.98755	binding;catalytic activity;methyltransferase activity;nucleic acid binding;RNA binding;RNA methyltransferase activity;S-adenosylmethionine-dependent methyltransferase activity;transferase activity;transferase activity, transferring one-carbon groups;tRNA (guanine) methyltransferase activity;tRNA (guanine-N7-)-methyltransferase activity;tRNA binding;tRNA methyltransferase activity			Methyltransf_4	IPR003358;IPR025763;IPR029063	SAM-dependent_MTases;Trm8_euk;tRNA_(Gua-N-7)_MeTrfase_Trmb	PS51625	SAM_MT_TRMB	tRNA (guanine-N(7)-)-methyltransferase		PF02390		PD_CE	8	8	8	23.4	23.4	23.4	39.483		0	28.076	634970000	10	0.233231	0.870666	0.000499051	6.82602	C8V3V0
18.4696	18.4962	18.4192	18.3803	18.0605	17.9331	18.0557	17.9856	18.3037	18.2898	18.4008	C8V3V1	ANIA_03659		+	0.4326	4.4339	+	0.322734	3.02501	binding;cation binding;ion binding;metal ion binding;transition metal ion binding;zinc ion binding	biological regulation		LIM	IPR001781	Znf_LIM	PS00478;PS50023	LIM_DOMAIN_1;LIM_DOMAIN_2			PF00412	MM_CE	PD_CE	18	18	18	27.2	27.2	27.2	86.605		0	91.46	792910000	21	0	10.8236	0.000458698	6.95549	C8V3V1
17.2007	17.0918	18.1023	17.1582	17.649	17.5969	17.7071	17.693	17.1882	16.9633	17.8299	C8V3V4	ANIA_03656			-0.273266	0.524402		-0.334362	0.726616	catalytic activity;hydrolase activity;hydrolase activity, acting on carbon-nitrogen (but not peptide) bonds	metabolic process;nitrogen compound metabolic process		CN_hydrolase	IPR003010	C-N_Hydrolase	PS50263	CN_HYDROLASE			PF00795			9	9	9	37.2	37.2	37.2	30.229		0	37.763	1247100000	14	0.144207	-1.13687	0.117793	-1.52545	C8V3V4
18.0824	17.9912	18.0205	18.0383	18.3609	17.9093	17.8513	17.7916	18.3823	18.3271	18.261	C8V3W4	ANIA_10450	x		0.054832	0.160851	+	0.34518	1.10629	binding;catalytic activity;methyltransferase activity;N-methyltransferase activity;nucleic acid binding;RNA methyltransferase activity;S-adenosylmethionine-dependent methyltransferase activity;transferase activity;transferase activity, transferring one-carbon groups;tRNA (guanine) methyltransferase activity;tRNA (guanine-N2-)-methyltransferase activity;tRNA methyltransferase activity			UPF0020	IPR000241;IPR002052;IPR016691;IPR029063	DNA_methylase_N6_adenine_CS;RNA_methylase_dom;SAM-dependent_MTases;tRNA_mtfrase_TRM11	PS00092;PS51627	N6_MTASE;SAM_MT_TRM11			PF01170		PD_CE	10	10	10	18.6	18.6	18.6	56.447		0	105.36	949560000	12	0.529751	0.418025	0.0351705	2.20812	C8V3W4
19.0985	19.1806	19.1077	19.0115	19.036	18.9695	18.9796	18.8182	18.8719	18.718	18.7614	C8V3W5	AN10449		+	0.148737	1.36926	+	-0.167076	1.25804	binding;catalytic activity;cation binding;coenzyme binding;cofactor binding;deacetylase activity;histone deacetylase activity;histone deacetylase activity (H3-K14 specific);histone deacetylase activity (H3-K9 specific);hydrolase activity;hydrolase activity, acting on carbon-nitrogen (but not peptide) bonds;hydrolase activity, acting on carbon-nitrogen (but not peptide) bonds, in linear amides;ion…	biological regulation;biosynthetic process;cellular localization;cellular metabolic process;cellular nitrogen compound metabolic process;cellular process;gene silencing;localization;macromolecule metabolic process;metabolic process;nitrogen compound metabolic process;nucleobase-containing compound metabolic process;primary metabolic process;regulation of gene expression, epigenetic;regulation of …		SIR2	IPR003000;IPR026590;IPR026591;IPR029035	DHS-like_NAD/FAD-binding_dom;Sirtuin;Sirtuin_cat_small_dom;Ssirtuin_cat_dom	PS50305	SIRTUIN	NAD-dependent protein deacetylase hst1		PF02146	MM_CE	PD_CE	14	14	14	24.1	24.1	24.1	54.296		0	45.255	1870600000	23	0.0138389	2.56309	0.0231764	-2.48939	C8V3W5
17.5586	17.6673	17.572	17.3776	17.1833	17.3077	17.1288	17.0997	17.8121	17.726	18.0414	C8V3W6	AN10433		+	0.364002	2.51848	+	0.679988	3.06708		catabolic process;cellular metabolic process;cellular process;macromolecule metabolic process;metabolic process;primary metabolic process;protein metabolic process;proteolysis;proteolysis involved in cellular protein catabolic process			IPR011990;IPR013026;IPR019734	TPR_repeat;TPR-contain_dom;TPR-like_helical_dom	PS50005;PS50293	TPR;TPR_REGION	UPF0661 TPR repeat-containing protein AN10433			MM_CE	PD_CE	6	6	6	21.7	21.7	21.7	42.859		0	40.458	406910000	9	0.00149376	4.79035	0.000392786	7.10335	C8V3W6
15.25	15.2433	15.2802	14.8717	15.0543	15.0292	15.1166	15.1082	14.8276	15.033	15.0278	C8V3W8	ANIA_03645			0.084228	0.368383		-0.114301	0.907329				Complex1_LYR	IPR008011	Complex1_LYR					PF05347			3	3	3	8.6	8.6	8.6	36.477		0	5.464	96435000	3	0.241941	0.84954	0.0637227	-1.84851	C8V3W8
19.1312	19.0407	19.1486	19.1032	19.1371	19.0701	19.1477	19.044	19.1567	19.1354	18.9489	C8V3X0	ANIA_03643			0.00616693	0.0631918		-0.0194044	0.113565	enzyme regulator activity;GTPase regulator activity;guanyl-nucleotide exchange factor activity;nucleoside-triphosphatase regulator activity	cellular component organization;cellular membrane organization;cellular process;endocytosis;endosome transport;establishment of localization;Golgi vesicle transport;membrane invagination;membrane organization;protein targeting;protein transport;transport;vacuolar transport;vesicle-mediated transport			IPR016024	ARM-type_fold					PF12783;PF16206;PF16213			23	23	23	14.5	14.5	14.5	177.5		0	68.403	1430100000	26	0.783867	0.177993	0.815147	-0.308835	C8V3X0
17.8056	17.8042	17.7694	18.335	18.772	18.9538	18.7337	19.2049	18.714	18.9114	18.3957	C8V3X4	ANIA_03639		+	-0.98754	2.90025		-0.242383	0.631874	catalytic activity;transferase activity;transferase activity, transferring acyl groups			2-oxoacid_dh;Biotin_lipoyl;E3_binding	IPR000089;IPR001078;IPR004167;IPR011053;IPR015761;IPR023213	2-oxoacid_DH_actylTfrase;BCKDC_E2;Biotin_lipoyl;CAT-like_dom;E3-bd;Single_hybrid_motif	PS50968	BIOTINYL_LIPOYL			PF00198;PF00364;PF02817	MM_CE		10	10	10	24.8	24.8	24.8	51.19		0	43.607	4337400000	17	0.000729574	-5.70176	0.169529	-1.35502	C8V3X4
16.9579	16.9142	16.6823	16.1152	15.8383	15.4071	15.6923	15.3862	16.6565	16.4349	16.9829	C8V3X5	ANIA_03638		+	1.0864	2.5536	+	1.11046	2.71685	binding;catalytic activity;cation binding;ion binding;iron ion binding;metal ion binding;oxidoreductase activity;transition metal ion binding	biosynthetic process;cellular ketone metabolic process;cellular lipid metabolic process;cellular metabolic process;cellular process;lipid metabolic process;metabolic process;organic acid metabolic process;primary metabolic process;small molecule metabolic process		FA_hydroxylase	IPR006694	Fatty_acid_hydroxylase					PF04116	MM_CE	PD_CE	3	3	3	13.2	13.2	13.2	30.21		0	5.9019	560570000	3	0.00135701	4.86973	0.000757612	5.94806	C8V3X5
17.3072	17.2521	17.2831	16.973	16.7541	16.8086	16.7604	16.8263	17.2114	17.1435	17.2837	C8V3Z3	ANIA_04283		+	0.416498	2.70468	+	0.425541	3.90195	binding;cation binding;ion binding;metal ion binding;transition metal ion binding;zinc ion binding	biological regulation;biosynthetic process;cellular metabolic process;cellular nitrogen compound metabolic process;cellular process;DNA metabolic process;DNA repair;macromolecule metabolic process;macromolecule modification;metabolic process;nitrogen compound metabolic process;nucleobase-containing compound metabolic process;phosphorus metabolic process;primary metabolic process;protein metabolic…		C1_4;Ssl1	IPR002035;IPR004595;IPR007087;IPR007198;IPR012170;IPR015880	Ssl1-like;TFIIH_C1-like_dom;TFIIH_SSL1/p44;VWF_A;Znf_C2H2;Znf_C2H2-like	PS00028;PS50234	VWFA;ZINC_FINGER_C2H2_1			PF04056;PF07975	MM_CE	PD_CE	7	7	7	15.2	15.2	15.2	50.256		0	18.163	876060000	7	0.000981095	5.22121	0.000164	10.667	C8V3Z3
21.2592	21.2438	21.2724	21.3392	21.4371	21.2926	21.2862	21.3736	21.1926	21.3263	21.172	C8V3Z4	ANIA_04282			-0.0687504	0.825294	+	-0.117108	0.989355	binding;catalytic activity;cation binding;hydrolase activity;ion binding;metal ion binding;metallopeptidase activity;peptidase activity;peptidase activity, acting on L-amino acid peptides;transition metal ion binding;zinc ion binding			ERAP1_C;Peptidase_M1	IPR001930;IPR014782;IPR024571	ERAP1-like_C_dom;Peptidase_M1;Peptidase_M1_N					PF01433;PF11838		PD_CE	34	34	34	32.6	32.6	32.6	99.183		0	323.31	45582000000	91	0.0584469	-1.65249	0.0495069	-1.99585	C8V3Z4
19.9184	20.0128	19.7989	20.0107	19.8053	19.8867	19.8521	19.7905	19.7532	19.6868	19.6478	C8V3Z5	ANIA_04281		+	0.101522	0.939825	+	-0.137712	1.88156	binding;catalytic activity;GTP binding;GTPase activity;guanyl nucleotide binding;guanyl ribonucleotide binding;hydrolase activity;hydrolase activity, acting on acid anhydrides;hydrolase activity, acting on acid anhydrides, in phosphorus-containing anhydrides;nucleoside-triphosphatase activity;nucleotide binding;purine nucleotide binding;purine ribonucleoside triphosphate binding;purine ribonucleo…	autophagy;biological regulation;catabolic process;cell communication;cellular component assembly;cellular component disassembly;cellular component organization;cellular membrane organization;cellular metabolic process;cellular process;endosome transport;establishment of localization;Golgi organization;Golgi vesicle transport;macromolecular complex assembly;membrane docking;membrane organization;m…		Ras	IPR001806;IPR003579;IPR005225;IPR027417	P-loop_NTPase;Small_GTPase;Small_GTPase_Rab_type;Small_GTP-bd_dom					PF00071	MM_CE	PD_CE	12	12	10	52.7	52.7	43.8	22.303		0	65.081	38820000000	55	0.0424932	1.84324	0.00518278	-3.76164	C8V3Z5
17.7778	17.762	17.7877	17.6196	17.7057	17.7042	17.6356	17.6536	17.7573	17.76	17.8569	C8V3Z7	ANIA_04279			0.0620031	0.695323	+	0.116631	1.70303	adenyl nucleotide binding;adenyl ribonucleotide binding;ATP binding;binding;catalytic activity;kinase activity;nucleotide binding;phosphotransferase activity, alcohol group as acceptor;protein kinase activity;purine nucleotide binding;purine ribonucleoside triphosphate binding;purine ribonucleotide binding;ribonucleotide binding;transferase activity;transferase activity, transferring phosphorus-c…	biological regulation;cellular metabolic process;cellular nitrogen compound metabolic process;cellular process;DNA metabolic process;macromolecule metabolic process;metabolic process;nitrogen compound metabolic process;nucleobase-containing compound metabolic process;primary metabolic process;regulation of cell cycle;regulation of DNA metabolic process;response to DNA damage stimulus;response to …		FHA;Pkinase	IPR000253;IPR000719;IPR002290;IPR008271;IPR008984;IPR011009;IPR017441	FHA_dom;Kinase-like_dom;Prot_kinase_dom;Protein_kinase_ATP_BS;Ser/Thr_dual-sp_kinase;Ser/Thr_kinase_AS;SMAD_FHA_domain	PS00107;PS00108;PS50006;PS50011	FHA_DOMAIN;PROTEIN_KINASE_ATP;PROTEIN_KINASE_DOM;PROTEIN_KINASE_ST			PF00069;PF00498		PD_CE	8	8	8	14.4	14.4	14.4	71.047		0	28.547	1054300000	15	0.0850498	1.43355	0.0077025	3.37351	C8V3Z7
18.3782	18.5108	17.3465	18.6302	17.507	17.4329	17.3648	17.482	18.0114	17.9913	18.538	C8V400	ANIA_04276		+	0.769744	1.39025	+	0.733515	2.29386												MM_CE	PD_CE	4	4	4	10.3	10.3	10.3	56.279		0	58.19	585110000	3	0.0131033	2.59904	0.00193943	4.7547	C8V400
18.7868	18.162	18.0631	18.8222	18.4523	18.4195	18.5947	18.5489	17.617	17.6764	17.4288	C8V408	ANIA_04268			-0.0452962	0.0796325	+	-0.929775	4.10916	catalytic activity;monooxygenase activity;nitronate monooxygenase activity;oxidoreductase activity;oxidoreductase activity, acting on single donors with incorporation of molecular oxygen;oxidoreductase activity, acting on single donors with incorporation of molecular oxygen, incorporation of one atom of oxygen (internal monooxygenases or internal mixed function oxidases)			NMO	IPR004136;IPR013785	2Npropane_dOase;Aldolase_TIM					PF03060		PD_CE	10	10	10	29.5	29.5	29.5	37.565		0	66.704	2136200000	21	0.735837	-0.220937	6.74699e-05	-11.7732	C8V408
19.9766	19.9914	20.3054	20.037	19.956	19.9892	19.9801	19.9969	19.5116	19.5347	19.2538	C8V414	ANIA_10533			0.0970478	0.589767	+	-0.547155	3.09273	catalytic activity	biosynthetic process;carbohydrate metabolic process;cellular metabolic process;cellular process;metabolic process;oligosaccharide metabolic process;primary metabolic process		Glyco_transf_20;Trehalose_PPase	IPR001830;IPR003337;IPR006379;IPR023214	Glyco_trans_20;HAD-like_dom;HAD-SF_hydro_IIB;Trehalose_PPase					PF00982;PF02358		PD_CE	32	32	32	36.2	36.2	36.2	104.81		0	125	8684400000	50	0.117575	1.25196	0.000397768	-7.19481	C8V414
17.1595	16.9034	16.9069	17.5223	17.5594	17.6843	17.5453	17.6694	16.5949	16.7155	16.7758	C8V415	ANIA_10534		+	-0.491585	1.76807	+	-0.919207	4.60647					IPR029069	HotDog_dom						MM_CE	PD_CE	7	7	7	20.4	20.4	20.4	37.681		0	17.883	469130000	8	0.00556927	-3.26888	0.00012362	-14.8868	C8V415
18.3403	18.5421	18.3306	17.9749	17.7091	17.5579	17.6208	17.6889	18.5368	18.5498	18.839	C8V427	ANIA_04251		+	0.652813	2.74369	+	0.997704	3.93621	structural constituent of ribosome;structural molecule activity	biosynthetic process;cellular metabolic process;cellular process;macromolecule metabolic process;metabolic process;primary metabolic process;protein metabolic process;translation		Ribosomal_S2	IPR001865;IPR005706;IPR023591	Ribosomal_S2;Ribosomal_S2_bac/mit/plastid;Ribosomal_S2_flav_dom					PF00318	MM_CE	PD_CE	12	12	12	40.7	40.7	40.7	36.621		0	125.99	1694100000	19	0.000875957	5.31468	0.000168898	10.8429	C8V427
18.9073	18.9434	18.8794	18.6397	18.604	18.5192	18.4984	18.5584	19.0941	19.0498	19.4007	C8V428	ANIA_04250		+	0.297459	2.19364	+	0.636555	2.92288		cellular process;establishment of localization;transmembrane transport;transport		Mito_carr	IPR002067;IPR018108;IPR023395	Mit_carrier;Mitochondrial_sb/sol_carrier;Mt_carrier_dom	PS50920	SOLCAR			PF00153	MM_CE	PD_CE	12	12	12	29.7	29.7	29.7	32.989		0	75.51	4888100000	30	0.00228043	4.09369	0.000613575	6.60724	C8V428
18.1103	18.1863	17.9038	17.9229	17.7309	17.717	17.7194	17.7257	18.3193	18.2406	18.4945	C8V429	ANIA_10535		+	0.30756	2.34419	+	0.628189	3.76444	binding;catalytic activity;cation binding;GTP binding;GTPase activity;guanyl nucleotide binding;guanyl ribonucleotide binding;hydrolase activity;hydrolase activity, acting on acid anhydrides;hydrolase activity, acting on acid anhydrides, in phosphorus-containing anhydrides;ion binding;metal ion binding;nucleic acid binding;nucleoside-triphosphatase activity;nucleotide binding;purine nucleotide bi…	biosynthetic process;cellular component organization;cellular metabolic process;cellular process;macromolecule metabolic process;metabolic process;mitochondrial translation;mitochondrion organization;organelle organization;primary metabolic process;protein metabolic process;translation		GTP_EFTU;GTP_EFTU_D2;IF-2;IF2_N	IPR000178;IPR000795;IPR001876;IPR004161;IPR005225;IPR006847;IPR009000;IPR015760;IPR023115;IPR027417	EF_GTP-bd_dom;IF2_N;P-loop_NTPase;Small_GTP-bd_dom;TF_IF2_bacterial-like;TIF_IF2;TIF_IF2_dom3;Transl_B-barrel;Transl_elong_EFTu/EF1A_2;Znf_RanBP2			Translation initiation factor IF-2		PF00009;PF04760;PF11987	MM_CE	PD_CE	13	13	13	18	18	18	116.65		0	157.46	808700000	18	0.00181789	4.40844	0.000145648	9.98708	C8V429
15.6287	15.6903	15.4455	15.4951	15.4112	15.3921	15.3862	15.4239	14.6595	14.5804	15.134	C8V440	ANIA_11406		+	0.161536	1.50849	+	-0.612056	2.08028	binding;catalytic activity;cation binding;DNA binding;DNA-directed RNA polymerase activity;ion binding;metal ion binding;nucleic acid binding;nucleotidyltransferase activity;RNA polymerase activity;RNA polymerase I activity;transferase activity;transferase activity, transferring phosphorus-containing groups;transition metal ion binding;zinc ion binding	biosynthetic process;cellular metabolic process;cellular nitrogen compound metabolic process;cellular process;macromolecule metabolic process;metabolic process;nitrogen compound metabolic process;nucleobase-containing compound metabolic process;primary metabolic process;RNA metabolic process;transcription from RNA polymerase II promoter;transcription from RNA polymerase III promoter		DNA_RNApol_7kD	IPR006591;IPR029040	RNAP_P/RPABC4;RPABC4/Spt4					PF03604	MM_CE	PD_CE	1	1	1	9.3	9.3	9.3	8.2653	+	1	-2	316880000	2	0.00969992	2.80375	0.00335901	-4.22194	C8V440
16.7041	16.8608	16.8504	16.8514	17.2911	17.0802	17.4653	17.1394	17.2205	17.0307	16.8368	C8V445	ANIA_03630		+	-0.427326	2.40881		-0.214654	0.745057				DUF924	IPR010323;IPR011990	DUF924;TPR-like_helical_dom					PF06041	MM_CE		4	4	4	12	12	12	39.298		0	7.0988	295380000	5	0.0017212	-4.54774	0.110135	-1.55846	C8V445
19.645	19.6219	19.9548	19.5095	19.1378	19.0068	18.9858	18.9653	19.4422	19.3994	19.7865	C8V449	ANIA_03626		+	0.658847	3.16281	+	0.518773	2.24006	adenyl nucleotide binding;adenyl ribonucleotide binding;ATP binding;binding;carbon-carbon lyase activity;carboxy-lyase activity;catalytic activity;cation binding;ion binding;lyase activity;metal ion binding;nucleotide binding;phosphoribosylaminoimidazole carboxylase activity;purine nucleotide binding;purine ribonucleoside triphosphate binding;purine ribonucleotide binding;ribonucleotide binding	biosynthetic process;cellular aromatic compound metabolic process;cellular metabolic process;cellular nitrogen compound metabolic process;cellular process;heterocycle metabolic process;metabolic process;nitrogen compound metabolic process;nucleobase-containing compound metabolic process;nucleobase-containing small molecule metabolic process;nucleotide metabolic process;peptide metabolic process;p…		AIRC;ATP-grasp	IPR000031;IPR003135;IPR005875;IPR011054;IPR011761;IPR013815;IPR013816;IPR016185;IPR016301	AIR_COase;ATP_grasp_subdomain_1;ATP_grasp_subdomain_2;ATP-grasp;ATP-grasp_carboxylate-amine;PreATP-grasp_dom;PurE_dom;PurK;Rudment_hybrid_motif	PS50975	ATP_GRASP			PF00731;PF02222;PF17769	MM_CE	PD_CE	25	25	25	34.9	34.9	34.9	61.406		0	91.969	5539600000	42	0.000438819	6.39701	0.00235946	4.61649	C8V449
14.9213	14.9434	14.8602	15.0289	15.0472	15.0626	15.2546	15.1807	14.9925	15.2491	15.1034	C8V450	ANIA_03625		+	-0.197804	1.76755		-0.021265	0.0897993				PPP4R2	IPR015267	PPP4R2					PF09184	MM_CE		3	3	3	12.4	12.4	12.4	35.36		0	19.803	208430000	3	0.00557799	-3.26793	0.853962	-0.249081	C8V450
16.3978	16.4489	16.3464	16.2785	16.1751	16.137	16.1327	16.1896	15.8996	15.9441	16.0089	C8V454	ANIA_03621		+	0.209329	2.76496	+	-0.207704	2.93061	acetyltransferase activity;catalytic activity;H3 histone acetyltransferase activity;histone acetyltransferase activity;lysine N-acetyltransferase activity;N-acetyltransferase activity;N-acyltransferase activity;transferase activity;transferase activity, transferring acyl groups;transferase activity, transferring acyl groups other than amino-acyl groups	biological regulation;cellular component organization;cellular metabolic process;cellular nitrogen compound metabolic process;cellular process;chromatin modification;chromatin organization;chromosome organization;DNA metabolic process;DNA recombination;macromolecule metabolic process;metabolic process;nitrogen compound metabolic process;nucleobase-containing compound metabolic process;organelle o…		Acetyltransf_7;Bromodomain	IPR000182;IPR001487;IPR016181;IPR018359	Acyl_CoA_acyltransferase;Bromodomain;Bromodomain_CS;GNAT_dom	PS00633;PS50014;PS51186	BROMODOMAIN_1;BROMODOMAIN_2;GNAT			PF00439;PF00583	MM_CE	PD_CE	7	7	7	15	15	15	47.754		0	15.565	274310000	7	0.000823651	5.36615	0.000611743	-6.63307	C8V454
15.3861	15.506	15.5589	15.6573	15.783	15.8662	16.0028	15.9067	15.3161	15.612	15.3645	C8V460	ANIA_10448		+	-0.362622	2.60703	+	-0.458791	2.34617	catalytic activity;hydrolase activity;hydrolase activity, acting on acid anhydrides;hydrolase activity, acting on acid anhydrides, in phosphorus-containing anhydrides;microtubule motor activity;motor activity;nucleoside-triphosphatase activity;pyrophosphatase activity				IPR002151;IPR011990;IPR013026;IPR019734	Kinesin_light;TPR_repeat;TPR-contain_dom;TPR-like_helical_dom	PS50293	TPR_REGION				MM_CE	PD_CE	4	4	4	3	3	3	170.47		0	9.2731	235360000	4	0.00112535	-4.99216	0.0018232	-4.89181	C8V460
17.4681	17.5914	17.5019	17.6439	17.8951	17.9892	17.8931	17.8791	17.6148	17.5969	17.5481	C8V474	ANIA_10446		+	-0.362822	3.57461	+	-0.327542	3.67567	catalytic activity;hydrolase activity;hydrolase activity, acting on ester bonds;phosphatase activity;phosphoprotein phosphatase activity;phosphoric ester hydrolase activity	biological regulation;cellular metabolic process;cellular process;macromolecule metabolic process;macromolecule modification;metabolic process;phosphorus metabolic process;primary metabolic process;protein dephosphorylation;protein metabolic process;protein modification process;regulation of cell cycle;regulation of mitotic cell cycle;response to chemical stimulus;response to stimulus;response to…		Metallophos	IPR004843;IPR029052	Calcineurin-like_PHP_apaH;Metallo-depent_PP-like					PF00149	MM_CE	PD_CE	10	10	10	17.9	17.9	17.9	61.433		0	24.809	669310000	13	0.000408163	-7.61981	0.000206051	-9.56957	C8V474
16.3554	16.0644	16.034	15.7625	16.3279	16.2139	16.0087	16.2508	16.2589	16.2415	16.7116	C8V475	ANIA_10429			-0.146235	0.476902		0.203676	0.624032	catalytic activity;hydrolase activity;hydrolase activity, acting on ester bonds;phosphatase activity;phosphoric ester hydrolase activity				IPR006383;IPR006384;IPR023214	HAD-like_dom;HAD-SF_hydro_IB_PSP-like;PyrdxlP_Pase-rel								2	2	2	6.9	6.9	6.9	29.621		0	5.589	194750000	4	0.167979	-1.05155	0.174584	1.34082	C8V475
16.1055	16.2061	16.4897	16.0778	16.3616	16.2388	16.1534	16.081	16.6071	17.3843	16.3067	C8V478	ANIA_03601			0.0110693	0.0341691	+	0.557315	0.994493	catalytic activity			Amidohydro_2	IPR006992	Amidohydro_2					PF04909		PD_CE	3	3	3	9	9	9	41.061		0	5.5793	158230000	4	0.878933	0.0990326	0.0488116	2.00511	C8V478
15.9951	16.2349	16.0273	15.8793	15.1985	15.3028	15.1268	15.4967	15.7225	15.7947	16.0099	C8V479	ANIA_03600	x	+	0.752956	3.33512	+	0.561198	2.27217					IPR029063	SAM-dependent_MTases					PF13649	MM_CE	PD_CE	2	2	2	4.7	4.7	4.7	45.128		0.00083389	3.2545	98487000	2	0.00047502	6.88772	0.00204351	4.69865	C8V479
18.5838	18.4787	18.6159	18.3962	18.5266	18.6559	18.4895	18.5085	18.4383	18.3877	18.3863	C8V480	ANIA_03599			-0.0264392	0.162158	+	-0.140996	1.52665					IPR029069	HotDog_dom							PD_CE	9	9	9	29.3	29.3	29.3	34.024		0	59.611	2134100000	22	0.527232	-0.421025	0.0114222	-3.01043	C8V480
20.2654	20.2227	20.2358	19.9954	19.6284	19.626	19.607	19.5946	20.2848	20.1096	20.1726	C8V493	ANIA_10527		+	0.565827	3.98637	+	0.575007	4.33394	binding;carboxylic acid binding;catalytic activity;cation binding;ion binding;iron ion binding;L-ascorbic acid binding;metal ion binding;oxidoreductase activity;oxidoreductase activity, acting on paired donors, with incorporation or reduction of molecular oxygen;oxidoreductase activity, acting on paired donors, with incorporation or reduction of molecular oxygen, 2-oxoglutarate as one donor, and …	amine metabolic process;biosynthetic process;cellular amino acid metabolic process;cellular ketone metabolic process;cellular metabolic process;cellular nitrogen compound metabolic process;cellular process;metabolic process;nitrogen compound metabolic process;organic acid metabolic process;primary metabolic process;small molecule metabolic process		DUF971;TauD	IPR003819;IPR010376;IPR012776	DUF971;Taurine_dOase;Trimethyllysine_dOase					PF02668;PF06155	MM_CE	PD_CE	18	18	18	33.9	33.9	33.9	59.792		0	276.09	7752400000	45	0.000153409	9.03198	8.58896e-05	13.0947	C8V493
18.1467	18.1554	18.0095	17.9622	17.9468	17.9595	17.8751	17.8846	18.4568	18.4171	18.6434	C8V494	ANIA_10526	x	+	0.151964	1.53913	+	0.5893	3.60802	arginine N-methyltransferase activity;catalytic activity;histone methyltransferase activity;histone methyltransferase activity (H4-R3 specific);histone-arginine N-methyltransferase activity;methyltransferase activity;N-methyltransferase activity;protein methyltransferase activity;protein-arginine N-methyltransferase activity;protein-arginine omega-N asymmetric methyltransferase activity;protein-a…	biological regulation;cellular component organization;cellular metabolic process;cellular process;chromatin modification;chromatin organization;chromosome organization;establishment of localization;histone modification;macromolecule metabolic process;macromolecule modification;metabolic process;nuclear transport;nucleobase-containing compound transport;nucleocytoplasmic transport;one-carbon metab…		Methyltransf_31	IPR025714;IPR025799;IPR029063	Arg_MeTrfase;Methyltranfer_dom;SAM-dependent_MTases	PS51678	SAM_MT_PRMT			PF13649	MM_CE	PD_CE	11	11	11	32.8	32.8	32.8	39.393		0	45.89	2396400000	18	0.00907574	2.85745	0.00022561	9.26216	C8V494
16.6101	16.672	16.6121	16.3844	16.5173	16.2854	16.4241	16.4754	16.3898	16.3522	16.4171	C8V495	ANIA_04235		+	0.144099	0.900789		-0.0391959	0.256865		biological regulation;biosynthetic process;cellular homeostasis;cellular ion homeostasis;cellular lipid metabolic process;cellular metabolic process;cellular process;homeostatic process;lipid metabolic process;macromolecule metabolic process;macromolecule modification;metabolic process;primary metabolic process;protein lipidation;protein metabolic process;protein modification process		Per1	IPR007217	Per1					PF04080	MM_CE		4	4	4	12.9	12.9	12.9	37.347		0	9.7114	703640000	6	0.0471044	1.77835	0.583273	-0.634707	C8V495
19.2117	19.2638	19.3129	19.2069	19.311	19.2143	19.4021	19.3051	19.5325	19.4304	19.414	C8V496	ANIA_04234			-0.0592847	0.614972	+	0.150839	1.39158	binding;catalytic activity;cation binding;intramolecular transferase activity;intramolecular transferase activity, phosphotransferases;ion binding;isomerase activity;magnesium ion binding;metal ion binding;phosphoacetylglucosamine mutase activity	alcohol metabolic process;amine metabolic process;biosynthetic process;carbohydrate metabolic process;cell wall organization or biogenesis;cellular cell wall organization or biogenesis;cellular metabolic process;cellular nitrogen compound metabolic process;cellular process;macromolecule metabolic process;metabolic process;nitrogen compound metabolic process;nucleobase-containing compound metaboli…		PGM_PMM_I;PGM_PMM_II;PGM_PMM_IV	IPR005843;IPR005844;IPR005845;IPR016055;IPR016066;IPR016657	A-D-PHexomutase_a/b/a-I;A-D-PHexomutase_a/b/a-I/II/III;A-D-PHexomutase_a/b/a-II;A-D-PHexomutase_C;A-D-PHexomutase_CS;PAGM	PS00710	PGM_PMM			PF00408;PF02878		PD_CE	19	19	19	32.5	32.5	32.5	59.617		0	166.25	10819000000	33	0.108351	-1.29574	0.0161283	2.74417	C8V496
16.7951	16.8863	16.8719	16.6517	16.8216	16.8388	16.8028	16.7995	16.4854	16.5282	16.6819	C8V4A3	ANIA_04227			-0.0144396	0.0969745	+	-0.250522	2.35193	catalytic activity;oxidoreductase activity			adh_short	IPR002198;IPR002347;IPR016040	DH_sc/Rdtase_SDR;Glc/ribitol_DH;NAD(P)-bd_dom					PF00106		PD_CE	6	6	6	17.6	17.6	17.6	40.774		0	10.235	332140000	7	0.687872	-0.264996	0.00176153	-4.90709	C8V4A3
17.3782	17.6439	17.3379	17.0062	17.0339	16.9477	16.9582	16.9927	18.0533	17.9325	18.4079	C8V4A4	ANIA_04226		+	0.358452	1.45525	+	1.14811	3.64808		cellular metabolic process;cellular nitrogen compound metabolic process;cellular process;macromolecule metabolic process;metabolic process;nitrogen compound metabolic process;nucleobase-containing compound metabolic process;primary metabolic process;RNA metabolic process;RNA processing;rRNA processing		Sof1;WD40	IPR001680;IPR007287;IPR015943;IPR017986;IPR020472	G-protein_beta_WD-40_rep;Sof1;WD40/YVTN_repeat-like_dom;WD40_repeat;WD40_repeat_dom	PS50082;PS50294	WD_REPEATS_2;WD_REPEATS_REGION			PF00400;PF04158	MM_CE	PD_CE	8	8	8	16.6	16.6	16.6	50.436		0	25.111	322120000	8	0.0110077	2.71109	0.000212698	9.44306	C8V4A4
19.5544	19.5717	19.7815	19.6041	19.4498	19.4749	19.286	19.3389	19.2993	19.428	19.4841	C8V4A5	ANIA_10519		+	0.2405	1.88805		0.0164081	0.0839615	structural molecule activity	catabolic process;cellular component assembly;cellular component organization;cellular macromolecular complex assembly;cellular metabolic process;cellular process;macromolecular complex assembly;macromolecule metabolic process;metabolic process;primary metabolic process;protein complex assembly;protein metabolic process;proteolysis;proteolysis involved in cellular protein catabolic process		PCI	IPR000717;IPR011990;IPR011991;IPR013143	PAM;PCI_dom;TPR-like_helical_dom;WHTH_DNA-bd_dom					PF01399;PF18055;PF18503	MM_CE		17	17	17	38	38	38	47.543		0	227.21	15092000000	40	0.00427794	3.49271	0.86304	0.234072	C8V4A5
18.9468	19.0458	19.0199	18.8752	18.857	18.8736	18.7963	18.7941	19.0204	19.0438	19.1161	C8V4A6	ANIA_10524		+	0.141664	1.75723	+	0.229839	2.95519				SWIB	IPR003121	SWIB_MDM2_domain					PF02201	MM_CE	PD_CE	22	22	22	49.6	49.6	49.6	52.936		0	91.097	3282900000	41	0.00568472	3.24896	0.00057434	6.7158	C8V4A6
21.0152	21.0641	21.4954	21.2386	19.396	19.2751	18.96	18.9089	19.6567	19.9892	19.7164	C8V4B0	ANIA_10518		+	2.06831	4.86518	+	0.652408	1.97023					IPR002190	MHD_dom						MM_CE	PD_CE	13	13	13	61	61	61	20.572		0	126.77	42367000000	62	0	12.8518	0.00414906	3.96311	C8V4B0
16.8978	16.8807	17.1061	16.9215	16.6648	16.7346	16.7522	16.7299	16.7185	16.6926	16.6317	C8V4B1	ANIA_10523		+	0.231112	2.22454		-0.0394581	0.581582		cellular metabolic process;cellular nitrogen compound metabolic process;cellular process;DNA metabolic process;DNA recombination;DNA repair;macromolecule metabolic process;metabolic process;nitrogen compound metabolic process;nucleobase-containing compound metabolic process;primary metabolic process;response to DNA damage stimulus;response to stimulus;response to stress		MAGE	IPR002190	MHD_dom					PF01454	MM_CE		6	6	6	14.5	14.5	14.5	38.022		0	17.348	316570000	8	0.00224163	4.15721	0.206464	-1.26364	C8V4B1
21.9979	21.9578	21.9431	22.0544	22.0803	21.9133	21.9134	21.681	22.195	22.0803	22.1485	C8V4B4	ANIA_04218			0.0913115	0.484324	+	0.244249	1.22012	binding;catalytic activity;GTP binding;GTPase activity;guanyl nucleotide binding;guanyl ribonucleotide binding;hydrolase activity;hydrolase activity, acting on acid anhydrides;hydrolase activity, acting on acid anhydrides, in phosphorus-containing anhydrides;nucleic acid binding;nucleoside-triphosphatase activity;nucleotide binding;purine nucleotide binding;purine ribonucleoside triphosphate bind…			GTP_EFTU;GTP_EFTU_D2;GTP_EFTU_D3	IPR000795;IPR004160;IPR004161;IPR004539;IPR009000;IPR009001;IPR027417	EF_GTP-bd_dom;P-loop_NTPase;Transl_B-barrel;Transl_elong_EF1A/Init_IF2_C;Transl_elong_EF1A_euk/arc;Transl_elong_EFTu/EF1A_2;Transl_elong_EFTu/EF1A_C	PS00301	EFACTOR_GTP	Elongation factor 1-alpha		PF00009;PF03143;PF03144		PD_CE	25	25	25	39.5	39.5	39.5	50.537		0	230.35	364110000000	287	0.163938	1.06499	0.0256045	2.41836	C8V4B4
15.8686	15.9731	15.8978	15.8099	15.5156	15.5473	15.3831	15.3484	15.9178	15.9415	16.1759	C8V4B5	ANIA_04217		+	0.438756	3.49992	+	0.563131	2.81773	ammonia-lyase activity;binding;carbon-nitrogen lyase activity;catalytic activity;cofactor binding;L-serine ammonia-lyase activity;L-threonine ammonia-lyase activity;lyase activity;pyridoxal phosphate binding;vitamin B6 binding;vitamin binding	amine metabolic process;catabolic process;cellular amino acid metabolic process;cellular ketone metabolic process;cellular metabolic process;cellular nitrogen compound metabolic process;cellular process;metabolic process;nitrogen compound metabolic process;organic acid metabolic process;primary metabolic process;small molecule metabolic process		PALP	IPR000634;IPR001926	Ser/Thr_deHydtase_PyrdxlP-BS;TrpB-like_PLP-dep	PS00165	DEHYDRATASE_SER_THR			PF00291	MM_CE	PD_CE	3	3	3	10.6	10.6	10.6	38.247		0	11.564	328010000	5	0.000384968	7.38492	0.000664138	6.26381	C8V4B5
18.4796	18.5282	18.4506	18.8146	18.9548	19.0119	19.0276	18.9963	18.4228	18.2444	18.2898	C8V4B8	teaR		+	-0.429406	2.62959	+	-0.678664	4.47725		biological regulation;localization										MM_CE	PD_CE	16	16	16	42.2	42.2	42.2	57.659		0	166.45	1977300000	28	0.0011404	-5.04447	0.000102752	-14.0096	C8V4B8
15.4493	15.4037	15.6287	15.5434	16.5062	16.6	16.515	16.8177	15.7579	15.9777	15.5849	C8V4C3	ANIA_04209		+	-1.10343	4.80011	+	-0.836207	2.89995	active transmembrane transporter activity;carbohydrate transmembrane transporter activity;cation transmembrane transporter activity;cation:sugar symporter activity;ion transmembrane transporter activity;secondary active transmembrane transporter activity;solute:cation symporter activity;solute:hydrogen symporter activity;substrate-specific transmembrane transporter activity;substrate-specific tra…			Nuc_sug_transp	IPR007271;IPR012404	Nuc_sug_transpt;UCP036436					PF04142	MM_CE	PD_CE	3	3	3	5.8	5.8	5.8	47.724		0	5.9773	367040000	2	0	-12.5247	0.000623214	-6.53106	C8V4C3
17.0968	17.3599	17.0323	17.1664	16.5687	16.4752	16.4649	16.6476	16.97	17.4021	17.1298	C8V4C4	ANIA_04208		+	0.624748	3.54839	+	0.628211	2.51775	catalytic activity;O-acyltransferase activity;transferase activity;transferase activity, transferring acyl groups;transferase activity, transferring acyl groups other than amino-acyl groups			MBOAT	IPR004299;IPR014371	MBOAT_fam;Oat_ACAT_DAG_ARE			O-acyltransferase		PF03062	MM_CE	PD_CE	6	6	6	13.2	13.2	13.2	61.16		0	28.506	462650000	7	0.0004	7.53665	0.00121888	5.36151	C8V4C4
18.0159	17.2903	17.9032	18.3306	18.6007	18.5834	18.5752	18.7422	17.1872	17.4313	17.468	C8V4D3	ANIA_04201		+	-0.740369	1.80865	+	-1.26319	4.54875	catalytic activity			AMP-binding;AMP-binding_C	IPR000873;IPR025110	AMP-bd_C;AMP-dep_Synth/Lig					PF00501;PF13193	MM_CE	PD_CE	12	12	12	16.9	16.9	16.9	65.428		0	24.573	1106400000	18	0.00503083	-3.34389	0.000111776	-14.4886	C8V4D3
17.0918	17.0293	17.3938	17.3644	17.3827	17.2972	17.4166	17.2574	16.9388	16.997	17.027	C8V4D4	grrA			-0.118645	0.551808	+	-0.35087	3.09404	acid-amino acid ligase activity;catalytic activity;ligase activity;ligase activity, forming carbon-nitrogen bonds;small conjugating protein ligase activity;ubiquitin-protein ligase activity	anatomical structure development;anatomical structure formation involved in morphogenesis;ascospore formation;biological regulation;catabolic process;cell development;cell differentiation;cellular metabolic process;cellular process;developmental process;macromolecule metabolic process;macromolecule modification;metabolic process;primary metabolic process;protein metabolic process;protein modifica…		F-box-like	IPR001810;IPR006553;IPR026940	F-box_dom;GrrA/Grr1;Leu-rich_rpt_Cys-con_subtyp			SCF E3 ubiquitin ligase complex F-box protein grrA		PF12937		PD_CE	6	6	6	10.1	10.1	10.1	65.081		0	45.562	902590000	11	0.132107	-1.18542	0.000398374	-7.1995	C8V4D4
18.8138	18.7216	18.7263	18.9376	19.963	20.1246	20.0998	20.1926	18.6159	18.9041	18.6032	C8V4D5	AN10522		+	-1.29518	5.79899	+	-1.38723	4.4556	binding;catalytic activity;cation binding;hydrolase activity;ion binding;metal ion binding;metallopeptidase activity;peptidase activity;peptidase activity, acting on L-amino acid peptides		Cell cycle - yeast;Ubiquitin mediated proteolysis	Peptidase_M28	IPR007484	Peptidase_M28			Vacuolar membrane protease		PF04389	MM_CE	PD_CE	24	24	24	28	28	28	106.35		0	227.91	13870000000	60	0	-18.5393	9.94671e-05	-13.8676	C8V4D5
20.5929	20.6659	21.0305	20.6911	21.4225	21.2525	21.3146	21.4449	20.6625	20.7632	20.9625	C8V4D7	ANIA_03592		+	-0.613518	2.90404	+	-0.562556	2.78735	binding;calcium ion binding;cation binding;ion binding;metal ion binding	biological regulation;catabolic process;cell death;cell wall organization or biogenesis;cellular cell wall organization or biogenesis;cellular metabolic process;cellular process;death;macromolecule metabolic process;metabolic process;primary metabolic process;protein folding;protein metabolic process;proteolysis;proteolysis involved in cellular protein catabolic process;response to chemical stimu…		Calreticulin	IPR001580;IPR009033;IPR013320;IPR018124	Calret/calnex;Calret/calnex_CS;Calreticulin/calnexin_P_dom;ConA-like_dom	PS00803;PS00804;PS00805	CALRETICULIN_1;CALRETICULIN_2;CALRETICULIN_REPEAT			PF00262	MM_CE	PD_CE	24	24	24	37.9	37.9	37.9	59.32		0	204.07	81364000000	99	0.000704111	-5.71137	0.00064856	-6.16736	C8V4D7
19.1942	19.1288	18.9045	19.0407	18.7357	18.6965	18.7165	18.6249	19.2064	18.9695	18.8607	C8V4E0	ANIA_03589		+	0.373682	2.84528	+	0.318841	1.78106		cellular component organization;cellular process;cytoskeleton organization;establishment of localization;mitosis;nuclear division;organelle fission;organelle organization			IPR028133	Dynamitin					PF04912	MM_CE	PD_CE	13	13	12	37.5	37.5	36	50.288		0	323.31	1972300000	20	0.000719298	5.56363	0.00661165	3.54041	C8V4E0
15.0949	14.9726	14.9579	14.9434	14.7901	15.0094	14.6979	14.925	14.4084	14.6254	14.6381	C8V4E1	ANIA_03588		+	0.136624	0.89106	+	-0.298317	1.46899	alpha-1,6-mannosyltransferase activity;catalytic activity;mannosyltransferase activity;transferase activity;transferase activity, transferring glycosyl groups;transferase activity, transferring hexosyl groups	biosynthetic process;carbohydrate metabolic process;cellular metabolic process;cellular process;macromolecule metabolic process;macromolecule modification;metabolic process;oligosaccharide metabolic process;primary metabolic process;protein glycosylation;protein metabolic process;protein modification process		Glyco_transf_22	IPR005599	GPI_mannosylTrfase					PF03901	MM_CE	PD_CE	1	1	1	1.3	1.3	1.3	66.974		0.00017027	3.858	89624000	2	0.0485583	1.76216	0.0133211	-2.89563	C8V4E1
18.6489	18.6149	18.491	18.1721	17.3751	17.2222	17.2171	17.2704	18.3208	18.3395	18.6185	C8V4E3	ANIA_03586		+	1.21052	4.37176	+	1.15506	4.25695	binding;catalytic activity;coenzyme binding;cofactor binding;flavin adenine dinucleotide binding;monooxygenase activity;oxidoreductase activity;oxidoreductase activity, acting on paired donors, with incorporation or reduction of molecular oxygen;oxidoreductase activity, acting on paired donors, with incorporation or reduction of molecular oxygen, NADH or NADPH as one donor, and incorporation of o…	biosynthetic process;cellular ketone metabolic process;cellular metabolic process;cellular process;cofactor metabolic process;metabolic process;small molecule metabolic process		FAD_binding_3	IPR002938;IPR003042;IPR010971;IPR018168	mOase_FAD-bd;Rng_hydrolase-like;Ubi_Hdrlase_CS;Ubi_Hdrxlases	PS01304	UBIH			PF01494	MM_CE	PD_CE	8	8	8	17.5	17.5	17.5	55.426		0	80.427	1309200000	17	0	10.557	7.9096e-05	12.627	C8V4E3
18.5345	18.5586	18.1916	18.068	17.641	17.6317	17.5534	17.5409	18.5838	18.599	18.7029	C8V4E8	ANIA_03581		+	0.74642	2.99177	+	1.03681	5.599	antioxidant activity;binding;catalytic activity;coenzyme binding;cofactor binding;flavin adenine dinucleotide binding;oxidoreductase activity;oxidoreductase activity, acting on a sulfur group of donors;oxidoreductase activity, acting on a sulfur group of donors, NAD or NADP as acceptor;oxidoreductase activity, acting on NADH or NADPH;thioredoxin-disulfide reductase activity	cellular metabolic process;cellular process;metabolic process;response to chemical stimulus;response to oxidative stress;response to stimulus;response to stress		Pyr_redox;Pyr_redox_2	IPR000103;IPR001327;IPR005982;IPR008255;IPR023753	Pyr_nucl-diS_OxRdtase_2_AS;Pyr_nucl-diS_OxRdtase_FAD/NAD;Pyr_OxRdtase_NAD-bd_dom;Pyridine_nuc-diS_OxRdtase_2;Thioredox_Rdtase	PS00573	PYRIDINE_REDOX_2	Thioredoxin reductase		PF07992	MM_CE	PD_CE	8	8	8	31	31	31	36.141		0	161.63	4367300000	24	0.000682266	5.93728	0	23.6486	C8V4E8
19.8697	19.7556	20.2116	20.8119	20.3252	20.3896	20.2951	19.7084	19.5725	19.5542	19.7825	C8V4F6;Q5AR82	ANIA_03573			-0.0173731	0.0207225	+	-0.54321	1.39801	aldehyde dehydrogenase (NAD) activity;catalytic activity;oxidoreductase activity;oxidoreductase activity, acting on the aldehyde or oxo group of donors;oxidoreductase activity, acting on the aldehyde or oxo group of donors, NAD or NADP as acceptor			Aldedh	IPR015590;IPR016160;IPR016161;IPR016162;IPR016163;IPR029510	Ald_DH/histidinol_DH;Ald_DH_C;Ald_DH_CS_CYS;Ald_DH_CS_GLU;Ald_DH_N;Aldehyde_DH_dom	PS00070;PS00687	ALDEHYDE_DEHYDR_CYS;ALDEHYDE_DEHYDR_GLU			PF00171		PD_CE	22	21	21	50.4	50.4	50.4	48.299		0	182.96	10474000000	42	0.925401	-0.0609151	0.0158825	-2.75664	C8V4F6
17.989	18.09	18.0159	17.945	18.1091	18.0813	18.0711	17.9795	18.1694	18.1274	18.0096	C8V4I7	ANIA_07889			-0.0502663	0.568373		0.0418924	0.340043				HNH_2	IPR003615	HNH_nuc					PF13391			9	9	9	17.6	17.6	17.6	44.891		0	33.57	755630000	15	0.125512	-1.21455	0.474449	0.80563	C8V4I7
14.2535	14.2869	14.2304	14.2304	13.8051	13.8778	13.5984	13.7608	14.4034	14.5389	14.6448	C8V4I9	ANIA_07891		+	0.489793	3.71282	+	0.768493	3.41273				Glyco_hydro_61	IPR005103	Glyco_hydro_61					PF03443	MM_CE	PD_CE	2	2	2	9	9	9	35.521		0.0024201	2.4335	50266000	2	0.000278564	8.07101	0.000227097	8.42402	C8V4I9
16.7214	16.8791	16.409	16.6269	18.622	17.5112	18.1771	16.7681	16.3672	16.1265	15.9931	C8V4J1	ANIA_07893		+	-1.1105	1.4306	+	-1.60733	1.66775	binding;catalytic activity;cation binding;ion binding;metal ion binding;oxidoreductase activity;oxidoreductase activity, acting on paired donors, with incorporation or reduction of molecular oxygen;oxidoreductase activity, acting on paired donors, with incorporation or reduction of molecular oxygen, 2-oxoglutarate as one donor, and incorporation of one atom each of oxygen into both donors			2OG-FeII_Oxy;DIOX_N	IPR005123;IPR026992;IPR027443	DIOX_N;IPNS-like;Oxoglu/Fe-dep_dioxygenase	PS51471	FE2OG_OXY			PF03171;PF14226	MM_CE	PD_CE	5	5	5	14.1	14.1	14.1	36.671		0	66.072	963010000	8	0.0114937	-2.66846	0.00846123	-3.29935	C8V4J1
16.4699	16.7702	16.6221	16.3503	18.8639	18.032	18.6461	16.7465	16.7694	16.4447	16.2881	C8V4J2	ANIA_07894		+	-1.51901	1.6954	+	-1.5714	1.3853				YCII	IPR005545;IPR011008	Dimeric_a/b-barrel;YCII					PF03795	MM_CE	PD_CE	7	7	7	54.5	54.5	54.5	12.563		0	34.908	1272400000	11	0.0064943	-3.1362	0.0163719	-2.73202	C8V4J2
16.6551	16.9686	16.9758	16.9797	15.1828	15.4183	15.2144	14.8565	15.2473	15.101	15.1985	C8V4J5	ANIA_07896		+	1.7268	4.74241		0.0142415	0.0342864	binding;cation binding;DNA binding;ion binding;metal ion binding;nucleic acid binding;nucleic acid binding transcription factor activity;sequence-specific DNA binding RNA polymerase II transcription factor activity;sequence-specific DNA binding transcription factor activity;transition metal ion binding;zinc ion binding			Fungal_trans;Zn_clus	IPR001138;IPR007219	Transcription_factor_dom_fun;Zn2-C6_fun-type_DNA-bd	PS00463;PS50048	ZN2_CY6_FUNGAL_1;ZN2_CY6_FUNGAL_2			PF00172;PF04082	MM_CE		3	3	3	5.3	5.3	5.3	66.143		0	5.4149	107760000	2	0	12.2411	0.94296	0.100188	C8V4J5
15.3139	15.4872	15.5863	15.7807	17.2388	16.6849	17.2179	15.7015	15.8621	15.2403	15.5324	C8V4J7	ANIA_11584		+	-1.16876	1.69403	+	-1.16586	1.30655				YCII	IPR005545;IPR011008	Dimeric_a/b-barrel;YCII					PF03795	MM_CE	PD_CE	3	3	3	20.4	20.4	20.4	10.722		0	5.7553	292500000	5	0.0064905	-3.13372	0.0202269	-2.58106	C8V4J7
12.946	13.0854	13.0181	12.9948	14.0882	14.017	14.1692	13.9086	12.9729	13.0708	13.1799	C8V4L2	ANIA_04195		+	-1.03468	5.51248	+	-0.971235	4.11281	carbon-nitrogen ligase activity, with glutamine as amido-N-donor;catalytic activity;ligase activity;ligase activity, forming carbon-nitrogen bonds			Amidase	IPR000120;IPR023631	Amidase;Amidase_dom					PF01425	MM_CE	PD_CE	2	2	2	3.8	3.8	3.8	66.433		0.0019439	2.5278	31568000	3	0	-16.5778	6.77966e-05	-11.7936	C8V4L2
20.1728	20.2654	20.2051	20.3006	19.8407	19.8333	19.8196	19.8418	19.8618	19.8878	19.804	C8V4L4	ANIA_10515		+	0.402128	5.03085		0.0173232	0.338597	adenyl nucleotide binding;adenyl ribonucleotide binding;ATP binding;binding;catalytic activity;kinase activity;nucleotide binding;phosphotransferase activity, alcohol group as acceptor;protein kinase activity;purine nucleotide binding;purine ribonucleoside triphosphate binding;purine ribonucleotide binding;ribonucleotide binding;transferase activity;transferase activity, transferring phosphorus-c…			Pkinase	IPR000719;IPR008271;IPR011009	Kinase-like_dom;Prot_kinase_dom;Ser/Thr_kinase_AS	PS00108;PS50011	PROTEIN_KINASE_DOM;PROTEIN_KINASE_ST			PF00069	MM_CE		43	43	43	45.6	45.6	45.6	110.11		0	175.98	4870300000	57	0	13.7213	0.476024	0.802738	C8V4L4
16.3284	16.2419	16.6415	16.184	16.5642	16.5587	16.6384	16.7292	17.2472	16.7728	17.3938	C8V4M1	ANIA_10525		+	-0.273663	1.33245	+	0.515301	1.59415												MM_CE	PD_CE	3	3	3	32.6	32.6	32.6	10.237		0	7.7578	809080000	5	0.0150934	-2.50028	0.00989294	3.14717	C8V4M1
13.5384	13.5326	13.2031	13.9519	14.6523	14.5699	14.4381	14.4168	13.2684	13.2682	13.2213	C8V4M5	ANIA_10530		+	-0.962794	2.97773	+	-1.26665	5.10799				DUF3500	IPR021889	DUF3500					PF12006	MM_CE	PD_CE	2	2	2	6.2	6.2	6.2	48.322		0	9.543	93038000	3	0.000674376	-5.90068	0	-18.8213	C8V4M5
14.2068	14.5863	13.7052	14.4822	13.1001	13.0857	12.995	13.0032	13.6457	13.8842	14.0752	C8V4M7	ANIA_10531		+	1.19912	3.02693	+	0.822385	3.19099				Abhydrolase_6	IPR000073;IPR029058	AB_hydrolase;AB_hydrolase_1					PF07859	MM_CE	PD_CE	2	2	2	6.3	6.3	6.3	44.58		0	24.474	28399000	2	0.000617128	6.02968	0.000318256	7.5545	C8V4M7
17.7531	18.1137	17.0411	18.0554	17.2469	17.2057	17.8574	17.2289	16.7982	16.88	16.8827	C8V4M8	ANIA_10513			0.356112	0.570063	+	-0.531103	1.43208	calcium-dependent cysteine-type endopeptidase activity;catalytic activity;cysteine-type endopeptidase activity;cysteine-type peptidase activity;endopeptidase activity;hydrolase activity;peptidase activity;peptidase activity, acting on L-amino acid peptides	macromolecule metabolic process;metabolic process;primary metabolic process;protein metabolic process;proteolysis		Peptidase_C2	IPR001300;IPR022684	Calpain_cysteine_protease;Peptidase_C2_calpain_cat	PS50203	CALPAIN_CAT			PF00648		PD_CE	7	7	7	8	8	8	96.162		0	96.887	622420000	7	0.124943	1.21752	0.0145542	-2.82305	C8V4M8
19.2028	18.9861	18.8972	19.401	20.0419	20.1223	20.1407	20.4099	19.4556	19.5236	19.1307	C8V4N2	ANIA_10512		+	-1.05696	3.57845	+	-0.808761	2.67796	acetyl-CoA C-acetyltransferase activity;acetyl-CoA C-acyltransferase activity;acetyltransferase activity;C-acetyltransferase activity;C-acyltransferase activity;catalytic activity;transferase activity;transferase activity, transferring acyl groups;transferase activity, transferring acyl groups other than amino-acyl groups	catabolic process;cellular ketone metabolic process;cellular lipid metabolic process;cellular metabolic process;cellular process;lipid metabolic process;metabolic process;organic acid metabolic process;primary metabolic process;small molecule metabolic process		Thiolase_C;Thiolase_N	IPR002155;IPR016038;IPR016039;IPR020610;IPR020615;IPR020616;IPR020617	Thiolase;Thiolase_acyl_enz_int_AS;Thiolase_AS;Thiolase_C;Thiolase_N;Thiolase-like;Thiolase-like_subgr	PS00098;PS00099	THIOLASE_1;THIOLASE_3			PF00108;PF02803	MM_CE	PD_CE	18	18	17	44.4	44.4	42.8	46.35		0	220.6	19014000000	41	0.000409756	-7.63205	0.00082764	-5.82976	C8V4N2
18.7642	18.5925	18.4753	19.0235	18.7424	18.6533	18.7287	19.1021	18.332	18.3523	18.0146	C8V4N3;REV__Q5AYZ5	ANIA_10520			-0.0927329	0.241619	+	-0.573646	1.91001				Abhydrolase_6	IPR000073;IPR029058	AB_hydrolase;AB_hydrolase_1					PF12697		PD_CE	18	18	18	38.9	38.9	38.9	60.595		0	107.73	1705800000	24	0.383942	-0.595453	0.00490022	-3.82562	C8V4N3
18.8682	18.8146	18.8464	19.1577	19.2995	19.4592	19.4009	19.3271	19.3177	19.1753	19.0882	C8V4N8	ANIA_04174		+	-0.449916	2.67708	+	-0.177954	1.27741	binding;carbon-sulfur lyase activity;catalytic activity;cation binding;ion binding;lactoylglutathione lyase activity;lyase activity;metal ion binding;transition metal ion binding;zinc ion binding	amine metabolic process;catabolic process;cellular aldehyde metabolic process;cellular amino acid metabolic process;cellular ketone metabolic process;cellular metabolic process;cellular nitrogen compound metabolic process;cellular process;metabolic process;nitrogen compound metabolic process;organic acid metabolic process;peptide metabolic process;primary metabolic process;small molecule metaboli…		Glyoxalase	IPR004360;IPR004361;IPR018146;IPR029068	Glyas_Bleomycin-R_OHBP_Dase;Glyas_Fos-R_dOase_dom;Glyoxalase_1;Glyoxalase_1_CS	PS00934;PS00935	GLYOXALASE_I_1;GLYOXALASE_I_2	Lactoylglutathione lyase		PF00903	MM_CE	PD_CE	10	10	10	33.6	33.6	33.6	36.556		0	214.28	15436000000	29	0.00106366	-5.15576	0.021919	-2.52587	C8V4N8
17.4041	17.5956	17.0761	17.5611	16.9337	16.9633	16.9725	16.8158	16.882	17.0072	17.021	C8V4P3	ANIA_10508		+	0.487888	2.11518		0.0487348	0.368555												MM_CE		3	3	3	44.3	44.3	44.3	10.688		0	71.331	522460000	6	0.00264105	3.93479	0.438213	0.862166	C8V4P3
19.593	19.4985	19.4703	19.5885	19.4547	19.5954	19.5177	19.4593	19.41	19.4029	19.2859	C8V4P5	ANIA_04168			0.0308065	0.282313	+	-0.140553	1.38646				DUF500;SH3_1	IPR001452;IPR007461;IPR013315	SH3_domain;Spectrin_alpha_SH3;Ysc84_actin-binding	PS50002	SH3			PF00018;PF04366		PD_CE	17	17	17	38.5	38.5	38.5	44.251		0	223.51	3961500000	37	0.329529	0.679733	0.0163492	-2.73425	C8V4P5
17.0301	17.0242	16.9364	17.2338	17.252	17.3811	17.2126	17.1896	16.5308	16.4863	16.7205	C8V4Q3	ANIA_10510		+	-0.20271	1.4276	+	-0.679615	3.46808												MM_CE	PD_CE	6	6	6	28.6	28.6	28.6	23.829		0	93.27	302800000	11	0.0116615	-2.66329	0.000228956	-8.65438	C8V4Q3
NaN	NaN	NaN	NaN	NaN	NaN	NaN	NaN	NaN	NaN	NaN	C8V4R0	ANIA_11402			0	NaN		0	NaN														1	1	1	14.3	14.3	14.3	11.268	+	1	-2	0	0	1	NaN	1	NaN	C8V4R0
19.7626	19.7345	19.4958	19.5957	18.4755	18.6228	18.6632	18.5056	18.9699	18.9618	18.9323	C8V4T3	ANIA_10424		+	1.0804	5.08989	+	0.387889	3.07744												MM_CE	PD_CE	14	14	14	28	28	28	55.405		0	33.583	4120000000	20	0	14.0444	0.000394366	7.14017	C8V4T3
19.1838	19.3246	18.9205	19.2016	17.9158	17.9758	18.2239	18.0059	18.3938	18.4057	18.437	C8V4T4	ANIA_10426		+	1.12728	4.33534	+	0.381837	2.29614					IPR027417	P-loop_NTPase					PF00350	MM_CE	PD_CE	13	13	13	27.6	27.6	27.6	50.323		0	191.09	4739300000	23	8.45666e-05	10.4036	0.0019232	4.76063	C8V4T4
15.5575	14.6014	15.0857	16.6201	15.0798	14.9505	15.3239	14.5608	14.1411	13.8917	13.949	C8V4X3	ANIA_07932			0.487417	0.481576	+	-0.984817	2.36903	binding;catalytic activity;cation binding;heme binding;ion binding;iron ion binding;metal ion binding;monooxygenase activity;oxidoreductase activity;oxidoreductase activity, acting on paired donors, with incorporation or reduction of molecular oxygen;tetrapyrrole binding;transition metal ion binding			p450	IPR001128;IPR002401;IPR017972	Cyt_P450;Cyt_P450_CS;Cyt_P450_E_grp-I	PS00086	CYTOCHROME_P450			PF00067		PD_CE	1	1	1	1.8	1.8	1.8	58.646		0.00050616	3.6028	29873000	1	0.165352	1.06002	0.00170348	-4.9526	C8V4X3
19.0873	18.9367	19.0801	18.3625	17.7775	17.7302	17.7086	17.7017	20.4333	20.7828	20.4181	C8V505	ANIA_10507		+	1.13713	3.2334	+	2.81524	5.93871				HSP20	IPR002068;IPR008978	A-crystallin/Hsp20_dom;HSP20-like_chaperone	PS01031	HSP20			PF00011	MM_CE	PD_CE	10	10	10	52.5	52.5	52.5	20.596		0	122.51	5266600000	30	0.000432836	6.59457	0	27.6817	C8V505
19.4065	19.3952	19.3338	19.0759	18.062	17.9656	18.0438	17.9577	20.6384	20.7566	20.8118	C8V506	ANIA_04127		+	1.29557	5.39619	+	2.72831	7.27562												MM_CE	PD_CE	9	9	9	39.4	39.4	39.4	25.376		0	144.24	25592000000	27	0	15.8401	0	51.3371	C8V506
16.8338	17.2667	16.6533	16.5435	16.1427	16.1836	16.503	16.4629	17.2381	17.3775	17.4934	C8V514	ANIA_04120		+	0.501278	1.45994	+	1.04661	3.38002	catalytic activity;monooxygenase activity;nitronate monooxygenase activity;oxidoreductase activity;oxidoreductase activity, acting on single donors with incorporation of molecular oxygen;oxidoreductase activity, acting on single donors with incorporation of molecular oxygen, incorporation of one atom of oxygen (internal monooxygenases or internal mixed function oxidases)			NMO	IPR004136;IPR013785	2Npropane_dOase;Aldolase_TIM					PF03060	MM_CE	PD_CE	5	5	5	15.8	15.8	15.8	40.39		0	11.227	186400000	5	0.0109446	2.71923	0.000246386	8.29047	C8V514
15.02	15.0018	15.0512	15.6167	15.9706	15.9332	15.7232	15.6833	14.6434	14.88	15.1359	C8V523	ANIA_10420		+	-0.655159	2.12985	+	-0.941167	2.86361	binding;catalytic activity;cation binding;ion binding	carbohydrate metabolic process;cellular metabolic process;cellular process;macromolecule metabolic process;metabolic process;polysaccharide metabolic process;primary metabolic process		Alpha-amylase	IPR006047;IPR006589;IPR013780;IPR013781;IPR015902;IPR017853	Glyco_hydro_13;Glyco_hydro_13_b;Glyco_hydro_13_cat_dom;Glyco_hydro_13_sub_cat_dom;Glyco_hydro_catalytic_dom;Glycoside_hydrolase_SF					PF00128	MM_CE	PD_CE	3	3	3	5.6	5.6	5.6	67.679		0.0024252	2.5053	86169000	3	0.00262751	-3.96425	0.000629292	-6.41181	C8V523
16.8461	16.7934	16.5704	16.9184	16.2755	16.9114	16.3653	16.2332	18.1375	17.1916	17.0955	C8V527	ANIA_03512		+	0.335735	0.988932	+	1.02853	1.5573												MM_CE	PD_CE	7	7	7	59.9	59.9	59.9	14.471		0	89.614	2541900000	9	0.0374628	1.9248	0.0106872	3.07222	C8V527
17.1573	17.3616	18.1688	16.9415	16.4236	16.304	16.3537	16.3156	17.6494	17.5458	17.6299	C8V528	ANIA_10422		+	1.05809	2.11249	+	1.25913	6.13416												MM_CE	PD_CE	6	6	6	46.7	46.7	46.7	17.644		0	63.767	530740000	7	0.00263356	3.9294	0	30.3028	C8V528
16.3936	16.2388	17.2338	16.3815	16.3946	16.3019	16.2914	16.3296	16.747	16.2691	16.1396	C8V529	ANIA_10421			0.232557	0.459856		0.0558416	0.132819					IPR001279	Beta-lactamas-like					PF12706			6	6	6	15.7	15.7	15.7	37.295		0	13.505	597340000	6	0.177796	1.02052	0.782139	0.355794	C8V529
15.609	15.5202	15.6776	15.6152	16.5711	16.6382	17.9634	17.0413	15.8302	15.5594	15.7936	C8V530	ANIA_10419		+	-1.44798	2.38397	+	-1.32575	1.73223				Glyco_hydro_61	IPR005103	Glyco_hydro_61					PF03443	MM_CE	PD_CE	2	2	2	6.8	6.8	6.8	26.501		0.00083195	3.173	23833000000	5	0.00177759	-4.49387	0.00716189	-3.43549	C8V530
12.2766	12.1368	12.5506	11.9834	11.9977	12.4122	11.9836	12.0839	12.2266	12.055	12.7831	C8V577	ANIA_07942			0.117495	0.317312		0.235576	0.480638	binding;cation binding;ion binding;metal ion binding;nucleic acid binding transcription factor activity;sequence-specific DNA binding RNA polymerase II transcription factor activity;sequence-specific DNA binding transcription factor activity;transition metal ion binding;zinc ion binding			Fungal_trans_2;Zn_clus	IPR001138;IPR021858	DUF3468;Zn2-C6_fun-type_DNA-bd	PS00463;PS50048	ZN2_CY6_FUNGAL_1;ZN2_CY6_FUNGAL_2			PF00172;PF11951			1	1	1	2.3	2.3	2.3	57.078	+	1	-2	6812500	1	0.290536	0.75003	0.305958	1.07708	C8V577
16.5553	16.5651	16.9433	16.456	16.5153	16.5649	16.6431	16.5044	16.2672	16.261	15.9514	C8V578	ANIA_07943			0.0730114	0.269096	+	-0.397056	2.06439	catalytic activity;hydrolase activity			Abhydrolase_3	IPR013094;IPR029058	AB_hydrolase;AB_hydrolase_3					PF07859		PD_CE	7	7	7	26.7	26.7	26.7	36.587		0	18.041	299850000	9	0.346309	0.65268	0.00349417	-4.18394	C8V578
16.5839	16.7049	16.2504	16.6121	16.011	16.1238	15.9734	15.8991	16.0252	15.998	15.9114	C8V586	ANIA_07951		+	0.536003	2.56021		-0.023644	0.142465	binding;cation binding;DNA binding;ion binding;metal ion binding;nucleic acid binding;nucleic acid binding transcription factor activity;sequence-specific DNA binding RNA polymerase II transcription factor activity;sequence-specific DNA binding transcription factor activity;transition metal ion binding;zinc ion binding			Fungal_trans	IPR001138;IPR007219	Transcription_factor_dom_fun;Zn2-C6_fun-type_DNA-bd	PS00463	ZN2_CY6_FUNGAL_1			PF04082	MM_CE		2	2	2	2.2	2.2	2.2	75.659		0.00082277	2.8591	109350000	3	0.0012354	4.88478	0.766024	-0.378877	C8V586
17.3606	17.2532	17.3315	17.2141	16.9319	16.9889	17.0014	17.2739	16.6268	16.8234	16.9378	C8V5A4	ANIA_10511		+	0.240834	1.55092	+	-0.253025	1.06958		biosynthetic process;cellular component organization;cellular lipid metabolic process;cellular metabolic process;cellular process;lipid metabolic process;localization;metabolic process;organelle organization;primary metabolic process		Scs3p	IPR019388	FIT					PF10261	MM_CE	PD_CE	2	2	2	5.7	5.7	5.7	32.462		0.00082836	3.0669	172910000	3	0.00881653	2.87819	0.0392045	-2.14111	C8V5A4
14.2772	14.114	14.0042	14.2707	14.421	14.397	14.771	14.7361	14.1336	13.7609	13.73	C8V5C0	ANIA_04088		+	-0.414757	1.87386	+	-0.706434	2.15535												MM_CE	PD_CE	2	2	2	6	6	6	38.339		0.0077056	1.8381	42744000	2	0.00445489	-3.46593	0.00280715	-4.40444	C8V5C0
20.0793	20.0357	20.0009	19.8583	19.6297	19.5937	19.5729	19.4723	20.079	20.1852	20.2688	C8V5C4	ANIA_04086		+	0.426416	3.46757	+	0.610535	3.77417	adenyl nucleotide binding;adenyl ribonucleotide binding;aminoacyl-tRNA ligase activity;ATP binding;binding;catalytic activity;cation binding;ion binding;ligase activity;ligase activity, forming aminoacyl-tRNA and related compounds;ligase activity, forming carbon-oxygen bonds;magnesium ion binding;metal ion binding;nucleic acid binding;nucleotide binding;phenylalanine-tRNA ligase activity;purine n…	amine metabolic process;cellular amino acid metabolic process;cellular ketone metabolic process;cellular metabolic process;cellular nitrogen compound metabolic process;cellular process;macromolecule metabolic process;metabolic process;nitrogen compound metabolic process;nucleobase-containing compound metabolic process;organic acid metabolic process;primary metabolic process;RNA metabolic process;…		B3_4;B5	IPR004531;IPR005146;IPR005147;IPR009061;IPR020825	B3/B4_tRNA-bd;DNA-bd_dom_put;Phe-tRNA_synthase_B3/B4;Phe-tRNA-synth_IIc_bsu_arc;tRNA_synthase_B5-dom	PS51483	B5			PF03483;PF03484;PF17759;PF18262	MM_CE	PD_CE	24	24	24	40.7	40.7	40.7	67.738		0	144.61	16178000000	57	0.000418979	7.28509	0.000146429	10.0338	C8V5C4
20.6024	20.5829	20.6243	20.7467	20.8646	20.8301	20.8619	20.7749	20.3556	20.4888	20.2814	C8V5C5	ANIA_04085		+	-0.193837	2.42223	+	-0.457613	3.334		biological regulation;cellular component organization;cellular metabolic process;cellular process;cytoskeleton organization;establishment or maintenance of cell polarity;metabolic process;organelle organization;phosphorus metabolic process;regulation of cell cycle;regulation of mitotic cell cycle;regulation of organelle organization;regulation of translation			IPR011989;IPR016024;IPR021133	ARM-like;ARM-type_fold;HEAT_type_2	PS50077	HEAT_REPEAT				MM_CE	PD_CE	25	25	25	37.5	37.5	37.5	69.026		0	112.59	22637000000	74	0.00162994	-4.57702	0.000254083	-8.10576	C8V5C5
15.8597	16.0491	16.1402	15.5138	15.2994	15.0434	15.0623	15.3767	16.2035	16.3626	16.5711	C8V5C9	ANIA_04081		+	0.69527	2.28954	+	1.1836	3.51974	binding;catalytic activity;cation binding;cysteine dioxygenase activity;dioxygenase activity;ion binding;iron ion binding;metal ion binding;oxidoreductase activity;oxidoreductase activity, acting on single donors with incorporation of molecular oxygen;oxidoreductase activity, acting on single donors with incorporation of molecular oxygen, incorporation of two atoms of oxygen;transition metal ion …	amine metabolic process;cellular amino acid metabolic process;cellular ketone metabolic process;cellular metabolic process;cellular nitrogen compound metabolic process;cellular process;metabolic process;nitrogen compound metabolic process;organic acid metabolic process;primary metabolic process;small molecule metabolic process;sulfur compound metabolic process		CDO_I	IPR010300;IPR011051;IPR014710	Cys_dOase_I;RmlC_Cupin;RmlC-like_jellyroll					PF05995	MM_CE	PD_CE	6	6	6	39.8	39.8	39.8	23.917		0	172.05	631030000	7	0.00206848	4.29262	0.000239605	8.87444	C8V5C9
18.7339	18.966	18.7708	18.6225	18.4021	18.3916	18.4544	18.5194	19.0699	19.048	19.2123	C8V5D0	ANIA_04080		+	0.331461	2.28736	+	0.668202	4.16449	binding;GTP binding;guanyl nucleotide binding;guanyl ribonucleotide binding;nucleotide binding;purine nucleotide binding;purine ribonucleoside triphosphate binding;purine ribonucleotide binding;ribonucleotide binding	biosynthetic process;cellular metabolic process;cellular process;cytoplasmic translation;macromolecule metabolic process;metabolic process;primary metabolic process;protein metabolic process;translation		MMR_HSR1;TGS	IPR004095;IPR005225;IPR006073;IPR006074;IPR012676;IPR027417	GTP_binding_domain;GTP1-OBG_CS;P-loop_NTPase;Small_GTP-bd_dom;TGS;TGS-like	PS00905	GTP1_OBG			PF01926;PF02824;PF16897	MM_CE	PD_CE	15	15	14	41	41	39.2	41.449		0	207.75	4750100000	28	0.00206687	4.28806	7.13376e-05	12.0863	C8V5D0
16.5856	16.5832	16.7252	16.7392	16.5984	16.5604	16.6249	16.6485	16.2552	16.1632	16.2831	C8V5G2	ANIA_04076			0.050252	0.489818	+	-0.374209	3.75394				PXA	IPR003114	Phox_assoc	PS51207	PXA			PF02194		PD_CE	6	6	6	10.8	10.8	10.8	70.81		0	37.577	223280000	6	0.161126	1.07491	0.000143608	-9.93683	C8V5G2
17.3873	17.4403	17.6875	17.3889	17.133	17.1221	17.2341	17.1815	17.5764	17.7454	17.4273	C8V5G3	ANIA_04075		+	0.30834	2.1756	+	0.415389	2.39636	catalytic activity;hydrolase activity;hydrolase activity, acting on glycosyl bonds;hydrolase activity, hydrolyzing N-glycosyl compounds;nicotinamide riboside hydrolase activity;nicotinic acid riboside hydrolase activity;ribosylpyrimidine nucleosidase activity;uridine nucleosidase activity	biosynthetic process;catabolic process;cellular metabolic compound salvage;cellular metabolic process;cellular nitrogen compound metabolic process;cellular process;cofactor metabolic process;heterocycle metabolic process;macromolecule metabolic process;metabolic process;nitrogen compound metabolic process;nucleobase-containing compound catabolic process;nucleobase-containing compound metabolic pr…		IU_nuc_hydro	IPR001910;IPR023186	Inosine/uridine_hydrolase;Inosine/uridine_hydrolase_dom					PF01156	MM_CE	PD_CE	6	6	6	32.5	32.5	32.5	17.42		0	16.781	984460000	11	0.00236484	4.05685	0.00166498	5.02599	C8V5G3
19.1294	19.266	19.0985	19.4575	19.5826	19.5552	19.5648	19.4702	19.4253	19.1973	19.1574	C8V5G6	ANIA_04072		+	-0.305354	1.92978	+	-0.283203	1.86949		biological regulation;cellular component organization;cellular metabolic process;cellular process;chromatin modification;chromatin organization;chromosome organization;histone modification;macromolecule metabolic process;macromolecule modification;metabolic process;organelle organization;primary metabolic process;protein metabolic process;protein modification process;regulation of cell cycle		Ank_2	IPR002110;IPR020683	Ankyrin_rpt;Ankyrin_rpt-contain_dom	PS50088;PS50297	ANK_REP_REGION;ANK_REPEAT			PF12796	MM_CE	PD_CE	29	29	29	26.8	26.8	26.8	137.81		0	205.55	1771400000	26	0.00386301	-3.57206	0.00532004	-3.73469	C8V5G6
16.6217	16.498	16.5637	16.4099	16.6225	16.5897	16.48	16.7343	15.8334	15.8173	16.0508	C8V5G7	ANIA_04071			-0.0833087	0.560976	+	-0.706102	3.3057	catalytic activity;oxidoreductase activity;oxidoreductase activity, acting on the CH-CH group of donors	alcohol metabolic process;biosynthetic process;carbohydrate metabolic process;catabolic process;cell growth;cellular lipid metabolic process;cellular metabolic process;cellular process;filamentous growth;growth;growth of unicellular organism as a thread of attached cells;lipid metabolic process;metabolic process;oligosaccharide metabolic process;primary metabolic process;pseudohyphal growth;small…		Steroid_dh	IPR001104	3-oxo-5_a-steroid_4-DH_C	PS50244	S5A_REDUCTASE			PF02544		PD_CE	4	4	4	13.2	13.2	13.2	39.112		0	33.856	344010000	5	0.128593	-1.20156	0.000327402	-7.99397	C8V5G7
19.1495	19.237	19.3399	19.1213	18.9402	18.9254	19.0688	19.0849	19.146	19.1118	19.159	C8V5J4	ANIA_10497		+	0.20712	1.73344	+	0.13412	1.33594	adenyl nucleotide binding;adenyl ribonucleotide binding;ATP binding;ATPase activity;binding;catalytic activity;chromatin binding;DNA binding;DNA helicase activity;DNA replication origin binding;helicase activity;hydrolase activity;hydrolase activity, acting on acid anhydrides;hydrolase activity, acting on acid anhydrides, in phosphorus-containing anhydrides;nucleic acid binding;nucleoside-triphos…	biological regulation;cellular component assembly;cellular component organization;cellular macromolecular complex assembly;cellular metabolic process;cellular nitrogen compound metabolic process;cellular process;DNA metabolic process;DNA recombination;DNA repair;gene silencing;macromolecular complex assembly;macromolecule metabolic process;metabolic process;nitrogen compound metabolic process;nuc…		MCM;MCM_N	IPR001208;IPR003593;IPR008046;IPR012340;IPR018525;IPR027417;IPR027925	AAA+_ATPase;MCM_CS;MCM_DNA-dep_ATPase;MCM_N;Mcm3;NA-bd_OB-fold;P-loop_NTPase	PS00847;PS50051	MCM_1;MCM_2	DNA helicase		PF00493;PF14551;PF17207;PF17855	MM_CE	PD_CE	28	28	28	36.1	36.1	36.1	93.599		0	135.99	2785200000	35	0.00599703	3.2054	0.0184571	2.63708	C8V5J4
15.8099	15.948	15.769	15.1963	14.7051	14.4412	14.5202	14.7594	15.616	15.8285	16.1873	C8V5J5	ANIA_10498		+	1.07435	2.97596	+	1.27081	3.22451				PPR	IPR002885	Pentatricopeptide_repeat					PF13041	MM_CE	PD_CE	2	2	2	1.3	1.3	1.3	141.2		0.00050727	3.683	57996000	2	0.000673147	5.8961	0.000325711	7.68069	C8V5J5
20.1158	20.5533	20.3702	19.8534	19.5044	19.3135	19.3407	19.3435	20.8545	20.8864	20.9943	C8V5J7	ANIA_04042		+	0.847643	2.75723	+	1.53624	5.68387	binding;C-22 sterol desaturase activity;catalytic activity;cation binding;heme binding;ion binding;iron ion binding;metal ion binding;monooxygenase activity;oxidoreductase activity;oxidoreductase activity, acting on paired donors, with incorporation or reduction of molecular oxygen;oxidoreductase activity, acting on paired donors, with oxidation of a pair of donors resulting in the reduction of m…	alcohol metabolic process;biosynthetic process;cellular component organization;cellular localization;cellular membrane organization;cellular metabolic process;cellular process;endocytosis;establishment of localization;lipid metabolic process;localization;membrane invagination;membrane organization;metabolic process;primary metabolic process;protein targeting;protein transport;small molecule metab…		p450	IPR001128;IPR002403;IPR017972	Cyt_P450;Cyt_P450_CS;Cyt_P450_E_grp-IV	PS00086	CYTOCHROME_P450			PF00067	MM_CE	PD_CE	16	16	16	29.2	29.2	29.2	60.28		0	135.93	4599900000	40	0.000818557	5.3474	0	24.5982	C8V5J7
17.6886	17.8935	18.3701	17.8746	17.4943	17.4313	17.2944	17.336	18.0882	17.9522	17.7448	C8V5L0	ANIA_07989		+	0.567685	2.01093	+	0.539384	2.54317	carbon-carbon lyase activity;carboxy-lyase activity;catalytic activity;lyase activity;phosphatidylserine decarboxylase activity	biosynthetic process;cellular lipid metabolic process;cellular metabolic process;cellular process;lipid metabolic process;metabolic process;primary metabolic process		PS_Dcarbxylase	IPR003817	PS_Dcarbxylase					PF02666	MM_CE	PD_CE	10	10	10	28.5	28.5	28.5	39.235		0	33.537	889270000	19	0.00320733	3.72872	0.00115736	5.4338	C8V5L0
18.4459	18.1483	19.587	18.7194	20.8864	20.9853	20.5827	20.0756	19.6976	20.7385	19.1049	C8V5M0	ANIA_07999		+	-1.90736	2.6687		-0.785514	0.814249	catalytic activity;oxidoreductase activity			adh_short	IPR002198;IPR002347;IPR016040	DH_sc/Rdtase_SDR;Glc/ribitol_DH;NAD(P)-bd_dom					PF00106	MM_CE		9	9	9	28.6	28.6	28.6	28.996		0	32.686	34591000000	33	0.00105796	-5.136	0.0865416	-1.68211	C8V5M0
19.0208	19.0696	19.27	19.1568	18.7021	18.7567	18.4158	18.7214	18.4684	18.8746	19.2416	C8V5N1	ANIA_04033		+	0.480325	2.61829		0.212517	0.449551		cellular component assembly;cellular component organization;cellular macromolecular complex assembly;cellular metabolic process;cellular process;macromolecular complex assembly;macromolecule metabolic process;metabolic process;primary metabolic process;protein complex assembly;protein folding;protein metabolic process		Prefoldin_2	IPR002777;IPR009053;IPR027235	PFD_beta-like;PFD2;Prefoldin					PF01920	MM_CE		12	12	12	83.1	83.1	83.1	13.575		0	89.974	4026400000	21	0.00113444	5.01822	0.341908	1.01846	C8V5N1
16.3218	16.4699	16.76	16.1017	16.3422	16.0344	16.2804	16.716	16.8295	16.4521	16.9676	C8V5N3	ANIA_04031			0.0701013	0.133991		0.406458	0.952031	catalytic activity;dolichyl-diphosphooligosaccharide-protein glycotransferase activity;oligosaccharyl transferase activity;transferase activity;transferase activity, transferring glycosyl groups;transferase activity, transferring hexosyl groups	carbohydrate metabolic process;cellular metabolic process;cellular process;macromolecule metabolic process;macromolecule modification;metabolic process;primary metabolic process;protein glycosylation;protein metabolic process;protein modification process		DAD	IPR003038	DAD/Ost2			Dolichyl-diphosphooligosaccharide--protein glycosyltransferase subunit OST2		PF02109			3	3	3	35.9	35.9	35.9	17.665		0	191.12	558280000	5	0.592199	0.355288	0.0552171	1.92868	C8V5N3
14.2109	14.2972	14.2031	14.7068	14.7343	14.7712	14.7001	14.6828	14.2873	14.3818	14.4849	C8V5N4	ANIA_10504		+	-0.367609	1.64181	+	-0.33742	2.84823	binding;cation binding;DNA binding;ion binding;metal ion binding;nucleic acid binding;nucleic acid binding transcription factor activity;sequence-specific DNA binding RNA polymerase II transcription factor activity;sequence-specific DNA binding transcription factor activity;transition metal ion binding;zinc ion binding			Fungal_trans;Zn_clus	IPR001138;IPR007219	Transcription_factor_dom_fun;Zn2-C6_fun-type_DNA-bd	PS00463;PS50048	ZN2_CY6_FUNGAL_1;ZN2_CY6_FUNGAL_2			PF00172;PF04082	MM_CE	PD_CE	3	3	3	4.4	4.4	4.4	91.059		0	8.712	47908000	4	0.00732346	-3.03964	0.000641169	-6.36189	C8V5N4
17.6793	17.5748	17.4556	17.4656	17.1072	17.0037	17.0553	17.0799	16.5993	16.7397	16.7126	C8V5N5	ANIA_10496		+	0.482291	3.82615	+	-0.377674	3.43228				LicD	IPR007074;IPR009644	Fukutin-related;LicD					PF04991	MM_CE	PD_CE	5	5	5	18.5	18.5	18.5	33.336		0	10.989	576320000	8	0.000312958	8.45779	0.000229765	-8.50476	C8V5N5
12.2867	11.9834	12.2766	12.3144	12.4409	12.3221	12.4119	12.429	13.0189	13.3899	13.6058	C8V5P7	ANIA_04019		+	-0.185707	1.189	+	0.937242	2.85371		cellular process;establishment of localization;transmembrane transport;transport		MFS_1	IPR011701;IPR020846	MFS;MFS_dom	PS50850	MFS			PF07690	MM_CE	PD_CE	1	1	1	2.6	2.6	2.6	58.046		0.0050955	2.0747	24041000	1	0.0216348	-2.25813	0.00064505	6.37964	C8V5P7
11.3908	11.7708	11.4537	11.7251	11.275	11.337	11.788	11.5534	13.3855	12.9392	12.7976	C8V5Q0	ANIA_10501			0.0967417	0.264445	+	1.55244	3.22284	binding;core promoter binding;core promoter sequence-specific DNA binding;DNA binding;nucleic acid binding;nucleic acid binding transcription factor activity;protein binding transcription factor activity;regulatory region DNA binding;regulatory region nucleic acid binding;RNA polymerase I CORE element sequence-specific DNA binding;RNA polymerase I CORE element sequence-specific DNA binding transc…			RRN7	IPR021752	TF_Rrn7					PF11781		PD_CE	2	2	2	5	5	5	64.429		0	5.3348	7853400	1	0.352708	0.64309	0.00032553	7.67437	C8V5Q0
18.1562	18.1109	18.1614	18.0372	17.7254	17.6381	17.6978	17.7319	17.909	17.8467	18.032	C8V5Q2	ANIA_04014		+	0.418123	4.62319	+	0.230931	2.16629		cellular process;endosome transport;establishment of localization;Golgi vesicle transport;transport;vacuolar transport;vesicle-mediated transport		Vps52	IPR007258	Vps52					PF04129	MM_CE	PD_CE	15	15	15	21.6	21.6	21.6	74.398		0	93.674	521910000	16	0	11.6741	0.00274627	4.43146	C8V5Q2
18.208	17.9186	17.9479	17.7678	17.739	17.542	17.6455	17.5543	18.1244	18.1488	18.4466	C8V5Q9	ANIA_10495		+	0.340363	1.80012	+	0.619738	2.75377	3-oxoacid CoA-transferase activity;catalytic activity;CoA-transferase activity;transferase activity;transferase activity, transferring sulfur-containing groups	catabolic process;cellular ketone body metabolic process;cellular metabolic process;cellular process;metabolic process;small molecule metabolic process		CoA_trans	IPR004165;IPR012791;IPR012792;IPR014388	3-oxoacid_CoA-transf_A;3-oxoacid_CoA-transf_B;3-oxoacid_CoA-transferase;CoA_trans_fam_I			Succinyl-CoA:3-ketoacid-coenzyme A transferase		PF01144	MM_CE	PD_CE	8	8	8	18.8	18.8	18.8	54.518		0	21.467	766690000	12	0.00512408	3.32807	0.000724486	6.06211	C8V5Q9
19.4843	19.3483	19.4646	19.4144	19.3787	19.3937	19.4001	19.4492	19.1824	19.2352	19.3415	C8V5T7	ANIA_08021			0.0224628	0.273408	+	-0.152387	1.77923	adenyl nucleotide binding;adenyl ribonucleotide binding;ATP binding;binding;nucleotide binding;purine nucleotide binding;purine ribonucleoside triphosphate binding;purine ribonucleotide binding;ribonucleotide binding	anatomical structure formation involved in morphogenesis;biological regulation;cell differentiation;cellular component organization;cellular homeostasis;cellular ion homeostasis;cellular membrane organization;cellular metabolic process;cellular nitrogen compound metabolic process;cellular process;developmental process;endocytosis;establishment of localization;filamentous growth;growth;heterocycle…		ATP-synt_ab;ATP-synt_ab_N	IPR000194;IPR004100;IPR027417	ATPase_F1/V1/A1_a/bsu_nucl-bd;ATPase_F1_a/bsu_N;P-loop_NTPase					PF00006;PF02874;PF16886		PD_CE	10	10	10	26.6	26.6	26.6	44.352		0	163.94	28263000000	37	0.340774	0.661538	0.00662944	-3.53645	C8V5T7
18.5591	18.8043	18.2233	18.7317	19.1057	19.4039	19.6647	19.0785	19.8682	19.349	19.2057	C8V5W2	ANIA_03983		+	-0.733579	2.08331		0.161102	0.281247												MM_CE		11	11	11	62.6	62.6	62.6	15.169		0	229.89	13740000000	24	0.00284551	-3.8712	0.55031	0.68586	C8V5W2
18.4528	18.2722	17.896	18.4559	18.5973	18.5033	18.4926	18.396	17.6509	17.7292	17.7125	C8V5W6	ANIA_03979			-0.228078	0.826221	+	-0.799776	4.65039				MAPEG	IPR001129;IPR023352	MAPEG-like_dom;Membr-assoc_MAPEG					PF01124		PD_CE	6	6	6	35.9	35.9	35.9	16.285		0	12.637	11618000000	15	0.0582608	-1.65404	0.000127854	-15.1968	C8V5W6
15.9437	16.1521	16.6784	17.181	17.0322	17.5313	17.0722	16.7006	18.8239	17.8152	17.2013	C8V5W7	ANIA_10494		+	-0.595264	0.929396		0.862717	0.95919	catalytic activity;oxidoreductase activity			adh_short	IPR002198;IPR002347;IPR016040	DH_sc/Rdtase_SDR;Glc/ribitol_DH;NAD(P)-bd_dom					PF00106	MM_CE		6	6	6	20.5	20.5	20.5	35.831		0	17.53	442860000	8	0.043788	-1.82591	0.0541383	1.94155	C8V5W7
17.3525	17.4086	17.1042	17.7782	17.678	17.7505	17.8854	17.6665	17.8888	17.6572	17.3856	C8V5X0	ANIA_03976		+	-0.33425	1.18939		-0.101294	0.311374				NmrA	IPR008030;IPR016040	NAD(P)-bd_dom;NmrA-like					PF05368	MM_CE		6	6	6	18.9	18.9	18.9	37.225		0	33.72	1104900000	8	0.0215733	-2.25878	0.510645	-0.747812	C8V5X0
17.7292	17.7404	18.7202	18.5153	18.3957	18.7301	18.3222	18.1972	20.0753	18.8685	18.1025	C8V5X5	ANIA_10499			-0.235036	0.359579		0.604138	0.552695	catalytic activity;oxidoreductase activity			Aldo_ket_red	IPR001395;IPR018170;IPR020471;IPR023210	Aldo/ket_red;Aldo/ket_reductase_CS;Aldo/keto_reductase_subgr;NADP_OxRdtase_dom	PS00062;PS00798	ALDOKETO_REDUCTASE_1;ALDOKETO_REDUCTASE_2			PF00248			9	9	9	24.6	24.6	24.6	34.753		0	36.169	608340000	8	0.249615	-0.832621	0.233178	1.21075	C8V5X5
16.2847	15.8823	16.8202	15.6472	16.0357	15.682	15.622	15.617	16.8564	16.3125	16.2364	C8V5Z2	ANIA_03958			0.41945	0.747576	+	0.729318	1.81614	catalytic activity;oxidoreductase activity;oxidoreductase activity, acting on paired donors, with incorporation or reduction of molecular oxygen;oxidoreductase activity, acting on paired donors, with incorporation or reduction of molecular oxygen, 2-oxoglutarate as one donor, and incorporation of one atom each of oxygen into both donors			2OG-FeII_Oxy_2	IPR005123;IPR027450	AlkB-like;Oxoglu/Fe-dep_dioxygenase	PS51471	FE2OG_OXY			PF13532		PD_CE	3	3	3	10	10	10	40.188		0	4.5303	140170000	3	0.0727852	1.52204	0.00623822	3.61679	C8V5Z2
19.1821	19.2476	18.9769	18.6834	18.3084	18.2976	18.2478	18.3012	18.629	18.6533	18.7813	C8V5Z6	ANIA_11045		+	0.733754	2.91883	+	0.399117	3.62257	binding;catalytic activity;coenzyme binding;cofactor binding;flavin adenine dinucleotide binding;oxidoreductase activity;oxidoreductase activity, acting on CH-OH group of donors;oxidoreductase activity, acting on the CH-OH group of donors, NAD or NADP as acceptor;UDP-N-acetylmuramate dehydrogenase activity			FAD_binding_4;FAD-oxidase_C	IPR004113;IPR006094;IPR016164;IPR016166;IPR016167;IPR016169	CO_DH_flavot_FAD-bd_sub2;FAD-bd_2;FAD-bd_2_sub1;FAD-linked_Oxase-like_C;FAD-linked_oxidase_C;Oxid_FAD_bind_N	PS51387	FAD_PCMH			PF01565;PF02913	MM_CE	PD_CE	11	11	11	20.6	20.6	20.6	61.268		0	198.58	3663500000	26	0.000709038	5.749	0.000229102	9.32748	C8V5Z6
16.1727	16.5224	16.5528	16.3625	15.9874	16.0004	16.0607	16.1534	16.1517	16.4428	16.5057	C8V5Z8	ANIA_08034		+	0.352121	1.99722	+	0.31626	1.57688				DUF4048	IPR025122	DUF4048					PF13257	MM_CE	PD_CE	6	6	6	12.3	12.3	12.3	46.464		0	11.619	82009000	6	0.00329412	3.70202	0.0102505	3.11195	C8V5Z8
16.6336	16.5772	16.494	16.5445	16.368	16.4653	16.397	16.4047	16.3189	16.5473	16.6711	C8V606	ANIA_08042		+	0.153573	2.29407		0.103679	0.523396	binding;catalytic activity;chromatin binding;deacetylase activity;histone deacetylase activity;histone deacetylase activity (H3-K14 specific);hydrolase activity;hydrolase activity, acting on carbon-nitrogen (but not peptide) bonds;hydrolase activity, acting on carbon-nitrogen (but not peptide) bonds, in linear amides;protein deacetylase activity	amine metabolic process;biological regulation;cellular amide metabolic process;cellular aromatic compound metabolic process;cellular component assembly;cellular component organization;cellular ketone metabolic process;cellular localization;cellular metabolic process;cellular nitrogen compound metabolic process;cellular process;chromatin modification;chromatin organization;chromosome organization;…		Arb2;Hist_deacetyl	IPR000286;IPR017321;IPR019154;IPR023801	Arb2_domain;His_deacetylse;His_deacetylse_dom;Hist_deAcase_II_yeast					PF00850;PF09757	MM_CE		7	7	7	9.1	9.1	9.1	85.235		0	24.407	389970000	7	0.00204836	4.30216	0.260739	1.15673	C8V606
18.8229	18.9754	16.9153	18.095	16.8562	17.137	17.7492	17.1394	19.5403	19.3925	19.3028	C8V607	ANIA_08043		+	0.981717	0.997368	+	2.19143	3.66395				Bys1	IPR006771	Bys1					PF04681	MM_CE	PD_CE	2	2	2	11.3	11.3	11.3	21.803		0	78.543	6517500000	5	0.0365229	1.93881	0.00020339	9.51562	C8V607
17.0836	17.1436	17.7065	17.1774	17.1054	17.0422	17.2763	17.1885	17.1444	17.2315	17.2252	C8V609	ANIA_08045			0.124696	0.350728		0.0472592	0.303742	binding;mRNA binding;nucleic acid binding;RNA binding	cellular metabolic process;cellular nitrogen compound metabolic process;cellular process;macromolecule metabolic process;metabolic process;mRNA metabolic process;mRNA processing;nitrogen compound metabolic process;nucleobase-containing compound metabolic process;primary metabolic process;RNA metabolic process;RNA processing		NUDIX_2	IPR016706	Cleav_polyA_spec_factor_su5					PF13869			9	9	8	36.4	36.4	29.8	30.897		0	79.902	1169600000	12	0.256874	0.815515	0.520565	0.732239	C8V609
16.3371	16.3849	16.378	16.071	16.3509	16.3973	16.1661	16.4929	16.2525	16.3368	16.6418	C8V612	ANIA_11033			-0.0590448	0.23543		0.0585473	0.176195	catalytic activity;dephospho-CoA kinase activity;kinase activity;phosphotransferase activity, alcohol group as acceptor;transferase activity;transferase activity, transferring phosphorus-containing groups	biosynthetic process;cellular metabolic process;cellular nitrogen compound metabolic process;cellular process;cofactor metabolic process;heterocycle metabolic process;metabolic process;nitrogen compound metabolic process;nucleobase-containing compound metabolic process;nucleobase-containing small molecule metabolic process;nucleoside metabolic process;nucleotide metabolic process;phosphorus metab…		DUF3431	IPR021838	DUF3431					PF11913			6	6	6	15.9	15.9	15.9	40.06		0	12.983	275200000	8	0.393201	-0.582367	0.710861	0.457495	C8V612
17.6006	17.4865	17.4835	17.6351	17.4726	17.5414	17.4879	17.3489	17.1118	17.1987	17.1468	C8V613	ANIA_11040			0.0887594	0.778876	+	-0.310239	2.70075	adenyl nucleotide binding;adenyl ribonucleotide binding;ATP binding;binding;catalytic activity;dephospho-CoA kinase activity;kinase activity;nucleotide binding;phosphotransferase activity, alcohol group as acceptor;purine nucleotide binding;purine ribonucleoside triphosphate binding;purine ribonucleotide binding;ribonucleotide binding;transferase activity;transferase activity, transferring phosph…	biosynthetic process;cellular metabolic process;cellular nitrogen compound metabolic process;cellular process;cofactor metabolic process;heterocycle metabolic process;metabolic process;nitrogen compound metabolic process;nucleobase-containing compound metabolic process;nucleobase-containing small molecule metabolic process;nucleoside metabolic process;nucleotide metabolic process;primary metaboli…		CoaE	IPR001977;IPR027417	Depp_CoAkinase;P-loop_NTPase	PS51219	DPCK			PF01121		PD_CE	7	7	7	21.1	21.1	21.1	31.102		0	20.922	877230000	9	0.0666293	1.57472	0.000796231	-5.89884	C8V613
18.4593	18.4978	18.6207	18.3048	18.4206	18.5437	18.2401	18.3439	18.8512	18.4977	19.0462	C8V616	ANIA_08050			0.0835829	0.403153	+	0.411274	1.35186				UPF0047	IPR001602	UPF0047	PS01314	UPF0047			PF01894		PD_CE	5	5	5	32.6	32.6	32.6	16.259		0	26.881	2068400000	20	0.215067	0.915512	0.0177269	2.66758	C8V616
16.9693	17.0951	18.2905	17.3423	17.2077	17.1833	17.0577	16.9573	18.0225	17.2765	17.1742	C8V617	ANIA_11039			0.322804	0.481535		0.389593	0.804472	carbon-sulfur lyase activity;catalytic activity;lyase activity			GFA	IPR006913;IPR011057	GFA/CENP-V;Mss4-like					PF04828			7	7	7	23.2	23.2	23.2	26.331		0	15.426	784660000	13	0.165333	1.05994	0.0894529	1.66465	C8V617
16.6647	16.488	16.4686	16.5094	16.2642	16.1396	16.2256	16.2819	16.2142	16.011	16.5102	C8V620	ANIA_03955		+	0.304834	2.84213		0.0173063	0.0472768				AD	IPR019181	Anticodon-binding_dom					PF09793	MM_CE		4	4	4	21.9	21.9	21.9	25.864		0	26.867	526980000	9	0.000717724	5.5558	0.923109	0.13636	C8V620
21.5513	21.6366	21.5956	21.6811	21.401	21.3567	21.3814	21.2591	21.0585	21.0303	20.7642	C8V621	ANIA_03954		+	0.26658	3.14492	+	-0.398551	2.22935	binding;catalytic activity;coenzyme binding;cofactor binding;NADP binding;nucleotide binding;oxidoreductase activity;oxidoreductase activity, acting on CH-OH group of donors;oxidoreductase activity, acting on the CH-OH group of donors, NAD or NADP as acceptor;phosphogluconate dehydrogenase (decarboxylating) activity	alcohol metabolic process;carbohydrate metabolic process;catabolic process;cellular metabolic process;cellular nitrogen compound metabolic process;cellular process;cofactor metabolic process;heterocycle metabolic process;metabolic process;nitrogen compound metabolic process;nucleobase-containing compound metabolic process;nucleobase-containing small molecule metabolic process;nucleotide metabolic…		6PGD;NAD_binding_2	IPR006113;IPR006114;IPR006115;IPR006183;IPR006184;IPR008927;IPR012284;IPR013328;IPR016040	6PGD_dom_2;6PGD_dom_3;6PGDH_C;6PGDH_Gnd/GntZ;6PGDH_NADP-bd;6PGdom_BS;6-PGluconate_DH_C-like;NAD(P)-bd_dom;Pgluconate_DH	PS00461	6PGD	6-phosphogluconate dehydrogenase, decarboxylating		PF00393;PF03446	MM_CE	PD_CE	22	22	22	38.6	38.6	38.6	54.028		0	323.31	153520000000	147	0.000431237	6.34771	0.00245759	-4.58932	C8V621
18.491	18.5003	18.4199	18.5016	18.5291	18.5266	18.656	18.5214	18.3221	18.2357	18.2406	C8V628	ANIA_03947		+	-0.0801067	1.09805	+	-0.292164	2.88189	3'-5' exonuclease activity;3'-5'-exodeoxyribonuclease activity;3'-tyrosyl-DNA phosphodiesterase activity;binding;carbon-oxygen lyase activity;catalytic activity;cation binding;deoxyribonuclease activity;DNA binding;DNA-(apurinic or apyrimidinic site) lyase activity;double-stranded DNA specific 3'-5' exodeoxyribonuclease activity;double-stranded DNA specific exodeoxyribonuclease activity;exodeoxyr…	catabolic process;cellular metabolic process;cellular nitrogen compound metabolic process;cellular process;DNA metabolic process;DNA repair;macromolecule metabolic process;metabolic process;nitrogen compound metabolic process;nucleobase-containing compound metabolic process;primary metabolic process;response to DNA damage stimulus;response to stimulus;response to stress		AP_endonuc_2	IPR001719;IPR013022;IPR018246	AP_endonuc_2;AP_endonuc_F2_Zn_BS;Xyl_isomerase-like_TIM-brl	PS00730;PS00731;PS51432	AP_NUCLEASE_F2_2;AP_NUCLEASE_F2_3;AP_NUCLEASE_F2_4			PF01261	MM_CE	PD_CE	19	19	19	32.2	32.2	32.2	60.397		0	57.508	956390000	23	0.0276888	-2.10621	0.000628698	-6.47156	C8V628
19.3457	19.2565	19.2507	19.1923	19.0455	19.0876	18.9822	18.9774	19.2758	19.3855	19.3254	C8V637	ANIA_03939		+	0.238123	2.92683	+	0.305693	3.16088	acid-amino acid ligase activity;catalytic activity;ligase activity;ligase activity, forming carbon-nitrogen bonds;small conjugating protein ligase activity;ubiquitin-protein ligase activity	cellular metabolic process;cellular process;macromolecule metabolic process;macromolecule modification;metabolic process;primary metabolic process;protein metabolic process;protein modification by small protein conjugation or removal;protein modification process		Cullin;Cullin_Nedd8	IPR001373;IPR011991;IPR016157;IPR016158;IPR016159;IPR019559	Cullin_CS;Cullin_homology;Cullin_N;Cullin_neddylation_domain;Cullin_repeat-like_dom;WHTH_DNA-bd_dom	PS01256;PS50069	CULLIN_1;CULLIN_2			PF00888;PF10557	MM_CE	PD_CE	23	23	23	27.8	27.8	27.8	94.188		0	141.22	2127800000	34	0.000685446	5.76944	0.000381663	7.44267	C8V637
12.3218	12.7597	12.6616	12.7828	12.287	12.5981	11.9165	12.1981	13.4272	13.8024	13.5696	C8V641	ANIA_03935		+	0.381545	1.13354	+	1.3498	3.07128				RCR	IPR020999	Chitin_synth_reg_RCR					PF12273	MM_CE	PD_CE	2	2	2	12.2	12.2	12.2	15.705		0	22.45	31747000	1	0.024811	2.16539	0.000393772	7.11826	C8V641
10.4962	10.2092	10.1206	10.4962	10.7089	10.6248	10.8708	10.4964	9.9006	9.90046	9.12659	C8V642	ANIA_03934		+	-0.344648	1.48126	+	-1.03267	2.1515	binding;GTP binding;guanyl nucleotide binding;guanyl ribonucleotide binding;nucleotide binding;purine nucleotide binding;purine ribonucleoside triphosphate binding;purine ribonucleotide binding;ribonucleotide binding	biological regulation;cellular process;response to stimulus;signal transduction		Arf	IPR005225;IPR006689;IPR024156;IPR027417	P-loop_NTPase;Small_GTPase_ARF;Small_GTPase_ARF/SAR;Small_GTP-bd_dom	PS51417	ARF			PF00025	MM_CE	PD_CE	1	1	1	7.3	7.3	7.3	20.159	+	1	-2	6982800	1	0.0102622	-2.75626	0.00282936	-4.39495	C8V642
15.5249	15.6573	15.7728	16.5158	16.2012	16.914	16.5245	15.9548	17.7887	16.8006	16.4122	C8V645	ANIA_03931		+	-0.530939	0.882036		0.60188	0.671838		anatomical structure formation involved in morphogenesis;cell wall organization;cell wall organization or biogenesis;cellular cell wall organization;cellular cell wall organization or biogenesis;cellular component assembly;cellular component organization;cellular process;developmental process;external encapsulating structure organization		Pil1	IPR028245	PIL1/LSP1					PF13805	MM_CE		6	6	6	14	14	14	44.572		0	8.8912	110110000	6	0.0496842	-1.74714	0.144788	1.42712	C8V645
18.6855	18.8804	18.732	18.7076	18.6559	18.6238	18.6523	18.6853	18.6243	18.5867	18.6451	C8V646	ANIA_03930		+	0.0971079	1.10673		-0.0356054	0.83884				SWI-SNF_Ssr4	IPR013859	DUF1750_fun					PF08549	MM_CE		11	11	11	21.9	21.9	21.9	52.13		0	67.336	2344000000	18	0.027006	2.12066	0.0797155	-1.72603	C8V646
11.145	11.0261	11.6463	10.8991	13.3188	13.1178	12.7399	12.9723	11.6162	12.1587	11.4753	C8V647	ANIA_10487		+	-1.85807	4.0063	+	-1.28715	2.63086	transmembrane transporter activity;transporter activity	cellular process;establishment of localization;ion transport;transmembrane transport;transport		MFS_1	IPR011701;IPR020846	MFS;MFS_dom	PS50850	MFS			PF07690	MM_CE	PD_CE	1	1	1	1.9	1.9	1.9	57.596		0.0011472	2.7854	25601000	1	0.000157895	-9.10573	0.000883668	-5.68895	C8V647
12.5841	12.7207	12.4405	13.0757	12.8691	13.0444	12.7209	12.6101	12.2136	12.6818	12.1274	C8V648	ANIA_10492			-0.105847	0.262766	+	-0.470162	1.30679				Ppx-GppA	IPR003695	Ppx_GppA					PF02541		PD_CE	1	1	1	2.3	2.3	2.3	63.532		0.0011449	2.722	13624000	1	0.35475	-0.639618	0.02021	-2.58152	C8V648
19.0843	18.8269	19.113	19.0334	19.5248	19.7449	19.6006	19.7894	18.7561	18.8578	18.763	C8V659	ANIA_03918		+	-0.650527	3.4664	+	-0.872613	4.00208	aminopeptidase activity;binding;catalytic activity;cation binding;exopeptidase activity;hydrolase activity;ion binding;metal ion binding;peptidase activity;peptidase activity, acting on L-amino acid peptides	catabolic process;cellular metabolic process;cellular process;macromolecule metabolic process;metabolic process;primary metabolic process;protein catabolic process;protein metabolic process		PA;Peptidase_M28	IPR003137;IPR007484;IPR029514	Ape3;Peptidase_M28;Protease-assoc_domain			Peptide hydrolase		PF02225;PF04389	MM_CE	PD_CE	8	8	8	17.9	17.9	17.9	52.928		0	52.541	19467000000	26	0.000418605	-7.28149	0.000130152	-11.1888	C8V659
14.4329	14.3577	14.6656	14.3641	17.3619	17.0651	17.0862	17.7061	16.978	17.0339	16.9501	C8V662	ANIA_03915		+	-2.84973	5.59623		-0.317488	0.868127	transporter activity			MIP	IPR000425;IPR022357;IPR023271	Aquaporin-like;MIP;MIP_CS	PS00221	MIP			PF00230	MM_CE		2	2	2	6.2	6.2	6.2	37.233		0	39.338	386770000	3	0	-17.1294	0.0723045	-1.77837	C8V662
14.9434	14.7358	14.9797	14.7898	14.948	15.1045	15.2401	15.0916	15.9292	15.3486	15.3434	C8V664	ANIA_03914		+	-0.233868	1.50006	+	0.444369	1.26699	catalytic activity;hydrolase activity;hydrolase activity, acting on glycosyl bonds;hydrolase activity, hydrolyzing O-glycosyl compounds	carbohydrate metabolic process;cell wall organization;cell wall organization or biogenesis;metabolic process;primary metabolic process		Glyco_hydro_16	IPR000757;IPR013320;IPR017168	ConA-like_dom;Glyco_hydro_16;Glyco_hydro_16_CRH1_prd					PF00722	MM_CE	PD_CE	1	1	1	2.3	2.3	2.3	38.026		0.0019449	2.5341	66685000	1	0.00984591	-2.78902	0.0227284	2.50624	C8V664
14.2236	14.1479	13.6452	14.3031	14.4383	14.4117	14.3308	14.1945	13.8628	13.4706	13.8626	C8V667	ANIA_11041			-0.263905	0.835106	+	-0.61186	2.31655	binding;cation binding;ion binding;metal ion binding;transition metal ion binding;zinc ion binding			zf-CHY	IPR008913	Znf_CHY	PS51266	ZF_CHY			PF05495		PD_CE	1	1	1	8	8	8	15.535		0.0061611	1.93	211800000	2	0.0567397	-1.66888	0.00189022	-4.81385	C8V667
18.5098	18.4773	18.2334	18.3381	18.1033	18.079	18.1368	18.0459	18.3372	18.1976	18.4032	C8V668	ANIA_08054		+	0.298405	2.37044	+	0.22141	1.97994	catalytic activity;endopeptidase activity;hydrolase activity;peptidase activity;peptidase activity, acting on L-amino acid peptides;threonine-type endopeptidase activity;threonine-type peptidase activity	catabolic process;cellular metabolic process;cellular process;establishment or maintenance of cell polarity;macromolecule metabolic process;metabolic process;primary metabolic process;protein metabolic process;proteolysis;proteolysis involved in cellular protein catabolic process		Proteasome	IPR001353;IPR023332;IPR029055	Ntn_hydrolases_N;Proteasome_sua/b;Proteasome_suA-type	PS51475	PROTEASOME_ALPHA_2			PF00227	MM_CE	PD_CE	14	14	14	53.3	53.3	53.3	26.992		0	94.629	3578100000	33	0.00181996	4.46472	0.00407989	3.98555	C8V668
19.1346	19.0787	19.0356	19.1764	18.7993	18.86	18.7912	18.8546	18.5153	18.6758	18.6048	C8V680	ANIA_08065		+	0.280061	3.639	+	-0.227605	2.43696		biological regulation;cellular component organization;cellular localization;cellular membrane organization;cellular process;cytoskeleton organization;endocytosis;establishment of localization;establishment or maintenance of cell polarity;localization;membrane invagination;membrane organization;organelle organization;regulation of organelle organization;transport;vesicle-mediated transport		P21-Arc	IPR007204	ARPC3			Actin-related protein 2/3 complex subunit 3		PF04062	MM_CE	PD_CE	8	8	8	36.7	36.7	36.7	21.16		0	31.728	6919100000	22	0.000364754	7.82728	0.00153528	-5.13643	C8V680
18.086	18.0603	17.945	17.8503	17.5201	17.382	17.2164	17.3668	17.8067	17.983	18.0681	C8V690	ANIA_08075		+	0.614078	3.51536	+	0.581258	2.71693	catalytic activity;deoxyhypusine synthase activity;transferase activity;transferase activity, transferring alkyl or aryl (other than methyl) groups	amine metabolic process;biosynthetic process;cellular amino acid metabolic process;cellular ketone metabolic process;cellular metabolic process;cellular nitrogen compound metabolic process;cellular process;macromolecule metabolic process;macromolecule modification;metabolic process;nitrogen compound metabolic process;organic acid metabolic process;peptidyl-amino acid modification;primary metaboli…		DS	IPR002773;IPR029035	Deoxyhypusine_synthase;DHS-like_NAD/FAD-binding_dom					PF01916	MM_CE	PD_CE	8	8	8	20	20	20	42.96		0	49.629	1229000000	13	0.000389249	7.43298	0.000757911	5.94828	C8V690
12.1368	11.8018	12.3978	12.2656	12.055	12.3296	12.2531	12.2531	11.8741	12.0255	12.1877	C8V6A4	ANIA_13001			-0.0722036	0.203291		-0.193635	0.926739	binding;cation binding;ion binding;metal ion binding;nucleic acid binding transcription factor activity;sequence-specific DNA binding RNA polymerase II transcription factor activity;sequence-specific DNA binding transcription factor activity;transition metal ion binding;zinc ion binding			Zn_clus	IPR001138	Zn2-C6_fun-type_DNA-bd	PS00463;PS50048	ZN2_CY6_FUNGAL_1;ZN2_CY6_FUNGAL_2			PF00172			1	1	1	1.5	1.5	1.5	69.673		0.0035268	2.2602	33070000	1	0.447262	-0.513138	0.0599832	-1.88329	C8V6A4
18.1117	17.8943	18.2004	18.4342	18.5091	18.5316	18.5983	18.6328	19.2493	18.978	19.4478	C8V6A6	ANIA_03901		+	-0.407806	1.91047	+	0.657067	2.5754	binding;catalytic activity;cation binding;coenzyme binding;cofactor binding;FMN binding;heme binding;ion binding;iron ion binding;lactate dehydrogenase activity;L-lactate dehydrogenase (cytochrome) activity;metal ion binding;nucleotide binding;oxidoreductase activity;oxidoreductase activity, acting on CH-OH group of donors;oxidoreductase activity, acting on the CH-OH group of donors, cytochrome a…	cellular ketone metabolic process;cellular metabolic process;cellular process;metabolic process;organic acid metabolic process;small molecule metabolic process		Cyt-b5;FMN_dh	IPR000262;IPR001199;IPR008259;IPR012133;IPR013785;IPR018506	Aldolase_TIM;Alpha-hydoxy_acid_DH_FMN;Cyt_B5_heme-BS;Cyt_B5-like_heme/steroid-bd;FMN_hydac_DH_AS;FMN-dep_DH	PS00191;PS00557;PS50255;PS51349	CYTOCHROME_B5_1;CYTOCHROME_B5_2;FMN_HYDROXY_ACID_DH_1;FMN_HYDROXY_ACID_DH_2			PF00173;PF01070	MM_CE	PD_CE	14	14	14	33	33	33	55.244		0	226.06	2072500000	26	0.00403488	-3.53524	0.00109078	5.52655	C8V6A6
19.3673	19.4075	19.1495	19.294	19.9437	20.0978	20.6355	20.8034	19.3404	19.4571	19.1491	C8V6B1	ANIA_03897		+	-1.06552	2.59503	+	-1.05457	2.03608	ammonia-lyase activity;carbon-nitrogen lyase activity;catalytic activity;lyase activity;phenylalanine ammonia-lyase activity	amine metabolic process;biosynthetic process;catabolic process;cellular amino acid metabolic process;cellular aromatic compound metabolic process;cellular ketone metabolic process;cellular metabolic process;cellular nitrogen compound metabolic process;cellular process;metabolic process;nitrogen compound metabolic process;organic acid metabolic process;primary metabolic process;secondary metabolic…		Lyase_aromatic	IPR001106;IPR005922;IPR008948;IPR022313;IPR024083	Aromatic_Lyase;Fumarase/histidase_N;L-Aspartase-like;Phe/His_NH3-lyase_AS;Phe_NH3-lyase	PS00488	PAL_HISTIDASE	Phenylalanine ammonia-lyase		PF00221	MM_CE	PD_CE	18	18	17	28.9	28.9	27.8	74.24		0	304.53	6166300000	40	0.00120037	-4.9645	0.00367954	-4.11677	C8V6B1
NaN	NaN	NaN	NaN	NaN	NaN	NaN	NaN	NaN	NaN	NaN	C8V6C1	ANIA_03887			0	NaN		0	NaN	binding;catalytic activity;cation binding;ion binding;metal ion binding;oxidoreductase activity;transition metal ion binding;zinc ion binding			adh_short;ADH_zinc_N	IPR002198;IPR006162;IPR009081;IPR013149;IPR013968;IPR016040	Acyl_carrier_prot-like;ADH_C;DH_sc/Rdtase_SDR;NAD(P)-bd_dom;PKS_KR;Ppantetheine_attach_site	PS00012;PS50075	ACP_DOMAIN;PHOSPHOPANTETHEINE			PF08659			1	1	1	1.5	1.5	1.5	65.9	+	1	-2	0	0	1	NaN	1	NaN	C8V6C1
19.3816	19.5845	19.4834	19.482	19.4423	19.2705	19.3426	19.3194	19.5234	19.7362	20.0006	C8V6D0	ANIA_10472		+	0.139152	1.35059	+	0.409685	1.68101	catalytic activity;hydroxyethylthiazole kinase activity;kinase activity;phosphotransferase activity, alcohol group as acceptor;thiamine-phosphate diphosphorylase activity;transferase activity;transferase activity, transferring alkyl or aryl (other than methyl) groups;transferase activity, transferring phosphorus-containing groups	biosynthetic process;cellular aromatic compound metabolic process;cellular metabolic process;cellular nitrogen compound metabolic process;cellular process;heterocycle metabolic process;metabolic process;nitrogen compound metabolic process;small molecule metabolic process;sulfur compound metabolic process;vitamin metabolic process		HK;TMP-TENI	IPR000417;IPR003733;IPR013785;IPR022998;IPR029056	Aldolase_TIM;Hyethyz_kinase;Ribokinase-like;ThiaminP_synth_SF;TMP_synthase					PF02110;PF02581	MM_CE	PD_CE	14	14	14	27	27	27	54.646		0	165.91	5295200000	29	0.0144376	2.5312	0.00816759	3.32714	C8V6D0
19.6008	19.535	19.6214	19.4703	19.2903	19.2689	19.2658	19.2014	19.6604	19.6393	19.7292	C8V6D1	ANIA_10474		+	0.300283	3.58446	+	0.419691	4.32977	aminoacyl-tRNA ligase activity;binding;catalytic activity;enzyme activator activity;enzyme regulator activity;ligase activity;ligase activity, forming aminoacyl-tRNA and related compounds;ligase activity, forming carbon-oxygen bonds;lipid binding;methionine-tRNA ligase activity;nucleic acid binding;phosphatidylinositol binding;phosphatidylinositol-3,5-bisphosphate binding;phosphatidylinositol-3-p…	amine metabolic process;biological regulation;cellular amino acid metabolic process;cellular ketone metabolic process;cellular metabolic process;cellular nitrogen compound metabolic process;cellular process;macromolecule metabolic process;metabolic process;nitrogen compound metabolic process;nucleobase-containing compound metabolic process;organic acid metabolic process;primary metabolic process;…		GST_C_3;tRNA_bind	IPR002547;IPR004046;IPR010987;IPR012340	Glutathione-S-Trfase_C-like;GST_C;NA-bd_OB-fold;tRNA-bd_dom	PS50886	TRBD			PF01588	MM_CE	PD_CE	14	14	14	44.1	44.1	44.1	46.541		0	201.01	14167000000	34	0.000411361	7.65126	8.54962e-05	13.069	C8V6D1
19.7634	19.6552	19.6315	19.6328	19.2805	19.311	19.1883	19.1892	19.4875	19.6237	19.5714	C8V6D2	ANIA_10475		+	0.428502	4.1461	+	0.318611	2.85489	adenyl nucleotide binding;adenyl ribonucleotide binding;aminoacyl-tRNA ligase activity;ATP binding;binding;catalytic activity;ligase activity;ligase activity, forming aminoacyl-tRNA and related compounds;ligase activity, forming carbon-oxygen bonds;nucleotide binding;purine nucleotide binding;purine ribonucleoside triphosphate binding;purine ribonucleotide binding;ribonucleotide binding;tryptopha…	amine metabolic process;cellular amino acid metabolic process;cellular ketone metabolic process;cellular metabolic process;cellular nitrogen compound metabolic process;cellular process;macromolecule metabolic process;metabolic process;nitrogen compound metabolic process;nucleobase-containing compound metabolic process;organic acid metabolic process;primary metabolic process;RNA metabolic process;…		tRNA-synt_1b	IPR001412;IPR002305;IPR002306;IPR014729	aa-tRNA-synth_I_CS;aa-tRNA-synth_Ic;Rossmann-like_a/b/a_fold;Trp-tRNA-ligase	PS00178	AA_TRNA_LIGASE_I			PF00579	MM_CE	PD_CE	17	17	17	37.5	37.5	37.5	48.42		0	199.23	15266000000	43	0.000181818	9.63829	0.000645608	6.38348	C8V6D2
18.7467	18.6302	18.4852	18.8372	18.2768	18.4426	18.2303	18.2064	18.8497	18.7265	18.472	C8V6E0	ANIA_08080		+	0.385743	2.22302	+	0.393669	1.76402	antioxidant activity;catalytic activity;oxidoreductase activity;oxidoreductase activity, acting on paired donors, with incorporation or reduction of molecular oxygen;oxidoreductase activity, acting on peroxide as acceptor;peroxidase activity;peroxiredoxin activity;thioredoxin peroxidase activity	biological regulation;cellular homeostasis;cellular process;homeostatic process;response to chemical stimulus;response to oxidative stress;response to stimulus;response to stress		Redoxin	IPR012336;IPR013740	Redoxin;Thioredoxin-like_fold	PS51352	THIOREDOXIN_2			PF08534	MM_CE	PD_CE	6	6	6	41.9	41.9	41.9	17.857		0	76.224	16793000000	11	0.0022391	4.15406	0.00677657	3.5036	C8V6E0
16.9908	16.724	15.6449	15.8906	15.4814	15.6011	15.871	15.9899	19.0607	19.2957	18.0079	C8V6E2	ANIA_11046			0.576765	0.840174	+	3.05226	3.43022				DUF1524	IPR011089	DUF1524					PF07510		PD_CE	4	4	4	28.7	28.7	28.7	19.714		0	14.109	322110000	7	0.0560379	1.67735	0.000229316	8.49624	C8V6E2
17.3821	17.2998	17.0009	17.928	17.6893	18.3595	17.8774	17.2898	20.3752	19.189	19.102	C8V6F7	ANIA_03873			-0.401303	0.654107	+	1.75143	2.00736	binding;catalytic activity;cation binding;ion binding;metal ion binding;oxidoreductase activity;transition metal ion binding;zinc ion binding			ADH_N;ADH_zinc_N	IPR002085;IPR011032;IPR013149;IPR013154;IPR016040	ADH_C;ADH_GroES-like;ADH_SF_Zn-type;GroES-like;NAD(P)-bd_dom					PF00107;PF08240		PD_CE	7	7	7	23.1	23.1	23.1	37.374		0	136.91	1289900000	14	0.0962221	-1.36317	0.00392709	4.04933	C8V6F7
19.4445	19.5142	19.3223	19.1416	18.8506	18.8506	18.8979	18.8602	19.3883	19.4592	19.6338	C8V6G5	ANIA_03865		+	0.49085	2.99918	+	0.628929	3.78165	adenyl nucleotide binding;adenyl ribonucleotide binding;aminoacyl-tRNA ligase activity;ATP binding;binding;catalytic activity;ligase activity;ligase activity, forming aminoacyl-tRNA and related compounds;ligase activity, forming carbon-oxygen bonds;methionine-tRNA ligase activity;nucleotide binding;purine nucleotide binding;purine ribonucleoside triphosphate binding;purine ribonucleotide binding;…	amine metabolic process;cellular amino acid metabolic process;cellular ketone metabolic process;cellular metabolic process;cellular nitrogen compound metabolic process;cellular process;macromolecule metabolic process;metabolic process;nitrogen compound metabolic process;nucleobase-containing compound metabolic process;organic acid metabolic process;primary metabolic process;RNA metabolic process;…		tRNA-synt_1g	IPR009080;IPR014729;IPR014758;IPR015413	Methionyl/Leucyl_tRNA_Synth;Met-tRNA_synth;Rossmann-like_a/b/a_fold;tRNAsynth_1a_anticodon-bd					PF09334	MM_CE	PD_CE	17	17	17	33.7	33.7	33.7	64.532		0	210.79	2467400000	27	0.000683529	5.95666	0.00014735	10.0699	C8V6G5
19.4575	19.3021	19.3087	19.3032	19.6338	18.8662	18.8392	18.6436	19.6001	19.1285	19.9361	C8V6G7	ANIA_11419			0.347143	0.773511		0.559207	0.83789	structural constituent of ribosome;structural molecule activity	biosynthetic process;cellular metabolic process;cellular process;macromolecule metabolic process;metabolic process;primary metabolic process;protein metabolic process;translation		Ribosomal_L38e	IPR002675	Ribosomal_L38e					PF01781			7	7	6	53.8	53.8	52.5	9.2589		0	8.0726	13272000000	24	0.0676157	1.5657	0.0799342	1.72434	C8V6G7
16.9563	16.8624	16.7761	16.7554	16.6615	16.7668	16.8496	16.8439	16.713	16.6336	16.9193	C8V6H5	ANIA_10470			0.0570879	0.394341		-0.0251716	0.104164	binding;catalytic activity;DNA binding;DNA polymerase activity;DNA-directed DNA polymerase activity;nucleic acid binding;nucleotidyltransferase activity;transferase activity;transferase activity, transferring phosphorus-containing groups	biological regulation;biosynthetic process;catabolic process;cellular component organization;cellular metabolic process;cellular nitrogen compound metabolic process;cellular process;chromosome organization;DNA metabolic process;DNA replication;homeostatic process;macromolecule metabolic process;metabolic process;nitrogen compound metabolic process;nucleobase-containing compound metabolic process;…		DNA_pol_E_B	IPR007185;IPR024826	DNA_pol_alpha/epsilon_bsu;DNA_pol_delta/II_ssu					PF04042;PF18018			6	6	6	17.1	17.1	17.1	59.335		0	43.613	274160000	6	0.222038	0.898915	0.831006	-0.285448	C8V6H5
17.0902	16.9693	17.2294	16.9156	17.0558	17.1818	17.037	17.1427	17.1196	17.2476	17.1184	C8V6I5	ANIA_10469			-0.0532017	0.284101		0.0575517	0.470205	catalytic activity;oxidoreductase activity			adh_short	IPR002198;IPR002347;IPR016040	DH_sc/Rdtase_SDR;Glc/ribitol_DH;NAD(P)-bd_dom					PF00106			5	5	5	17.8	17.8	17.8	29.248		0	9.6377	375360000	6	0.32745	-0.683371	0.317645	1.05748	C8V6I5
17.6455	17.7609	17.6721	17.5202	16.763	16.6773	16.6999	16.7282	17.6669	17.582	17.595	C8V6I6	ANIA_10480		+	0.932569	5.66286	+	0.897551	6.02846				cobW	IPR003495;IPR011629;IPR027417	Cbl_biosynth_CobW-like_C;CobW/HypB/UreG_dom;P-loop_NTPase					PF02492	MM_CE	PD_CE	6	6	6	12.7	12.7	12.7	44.431		0	17.877	982450000	8	0	17.5808	0	28.8561	C8V6I6
14.9393	14.8769	14.7629	14.9226	14.5527	14.773	14.7728	14.4357	14.3526	14.3894	14.5445	C8V6J8	ANIA_03835		+	0.241865	1.39334		-0.204712	0.906611	binding;cation binding;DNA binding;ion binding;metal ion binding;nucleic acid binding;nucleic acid binding transcription factor activity;sequence-specific DNA binding RNA polymerase II transcription factor activity;sequence-specific DNA binding transcription factor activity;transition metal ion binding;zinc ion binding			Fungal_trans;Zn_clus	IPR001138;IPR007219	Transcription_factor_dom_fun;Zn2-C6_fun-type_DNA-bd	PS00463;PS50048	ZN2_CY6_FUNGAL_1;ZN2_CY6_FUNGAL_2			PF00172;PF04082	MM_CE		4	4	4	6.1	6.1	6.1	66.116		0	16.846	89466000	4	0.0129781	2.60434	0.063906	-1.84722	C8V6J8
15.9084	15.7962	15.9678	15.5468	15.7603	15.5048	15.7279	15.2108	16.6642	16.2404	16.5874	C8V6K2	ANIA_11035			0.253857	0.802155	+	0.946393	2.42423	catalytic activity;monooxygenase activity;oxidoreductase activity	metabolic process		FAD_binding_3	IPR002938;IPR003042	mOase_FAD-bd;Rng_hydrolase-like					PF01494		PD_CE	3	3	3	8	8	8	39.667		0	5.2025	88072000	3	0.0627251	1.61377	0.00156879	5.1016	C8V6K2
16.8713	16.8058	16.6745	17.0949	16.5095	16.5358	16.4427	16.4714	16.4226	16.4003	16.7182	C8V6K3	ANIA_11043		+	0.371757	2.2066		0.0238264	0.0970036	acetyltransferase activity;catalytic activity;N-acetyltransferase activity;N-acyltransferase activity;transferase activity;transferase activity, transferring acyl groups;transferase activity, transferring acyl groups other than amino-acyl groups			Acetyltransf_1	IPR000182;IPR016181	Acyl_CoA_acyltransferase;GNAT_dom	PS51186	GNAT			PF00583	MM_CE		3	3	3	14.4	14.4	14.4	23.41		0	4.2429	111570000	3	0.00225251	4.12027	0.842465	0.267418	C8V6K3
15.3085	14.9263	16.4354	15.6189	17.529	17.4848	17.5082	17.1926	16.606	17.21	16.0185	C8V6L8	ANIA_11049		+	-1.85642	2.86788	+	-0.817192	1.36876				NmrA	IPR008030;IPR016040	NAD(P)-bd_dom;NmrA-like					PF05368	MM_CE	PD_CE	5	5	5	15.6	15.6	15.6	37.619		0	80.289	2190900000	8	0.000735838	-5.62012	0.0170177	-2.70008	C8V6L8
14.7298	14.9675	14.9341	15.1564	15.7003	15.7545	15.7411	15.4203	18.1624	18.1118	18.2829	C8V6N3	ANIA_08122		+	-0.707125	3.01981	+	2.53163	5.69482		cellular process;establishment of localization;transmembrane transport;transport		MFS_1	IPR011701;IPR020846	MFS;MFS_dom	PS50850	MFS			PF07690	MM_CE	PD_CE	4	4	4	7.3	7.3	7.3	58.852		0	7.9712	144540000	4	0.000613651	-6.01087	0	24.7234	C8V6N3
14.9324	14.8009	15.0769	14.9829	15.3434	15.3112	15.2951	15.2699	14.9401	14.7562	14.8291	C8V6N6	ANIA_08125		+	-0.356641	3.01078	+	-0.463141	3.6796	binding;cation binding;DNA binding;ion binding;metal ion binding;nucleic acid binding;nucleic acid binding transcription factor activity;sequence-specific DNA binding RNA polymerase II transcription factor activity;sequence-specific DNA binding transcription factor activity;transition metal ion binding;zinc ion binding			Fungal_trans;Zn_clus	IPR001138;IPR007219	Transcription_factor_dom_fun;Zn2-C6_fun-type_DNA-bd	PS00463;PS50048	ZN2_CY6_FUNGAL_1;ZN2_CY6_FUNGAL_2			PF00172;PF04082	MM_CE	PD_CE	3	3	3	6.1	6.1	6.1	90.007		0	76.18	194600000	3	0.000607187	-5.98711	0.000206897	-9.58768	C8V6N6
16.6884	16.7193	17.6065	16.6971	16.4621	16.3289	16.165	16.6814	16.0445	16.2575	17.3717	C8V6P1	ANIA_08129		+	0.518455	1.07235		0.148539	0.153071	binding;cation binding;ion binding;metal ion binding;nucleic acid binding transcription factor activity;sequence-specific DNA binding RNA polymerase II transcription factor activity;sequence-specific DNA binding transcription factor activity;transition metal ion binding;zinc ion binding	anatomical structure formation involved in morphogenesis;biological regulation;developmental process;reproduction;sporulation		Fungal_trans_2;Zn_clus	IPR001138;IPR021858	DUF3468;Zn2-C6_fun-type_DNA-bd	PS00463;PS50048	ZN2_CY6_FUNGAL_1;ZN2_CY6_FUNGAL_2			PF00172;PF11951	MM_CE		5	5	5	10.5	10.5	10.5	68.366		0	31.042	142820000	4	0.0297719	2.06342	0.748041	0.403936	C8V6P1
19.4799	19.5637	19.1942	19.2745	18.5423	18.5338	18.4189	18.4991	19.1567	19.1899	19.2294	C8V6Q6	ANIA_03830		+	0.879594	4.1596	+	0.693474	5.06135	ammonia-lyase activity;binding;carbon-nitrogen lyase activity;catalytic activity;cofactor binding;L-threonine ammonia-lyase activity;lyase activity;pyridoxal phosphate binding;vitamin B6 binding;vitamin binding	amine metabolic process;biosynthetic process;catabolic process;cellular amino acid metabolic process;cellular ketone metabolic process;cellular metabolic process;cellular nitrogen compound metabolic process;cellular process;metabolic process;nitrogen compound metabolic process;organic acid metabolic process;primary metabolic process;small molecule metabolic process		PALP;Thr_dehydrat_C	IPR000634;IPR001721;IPR001926;IPR005787	ACT-like_dom;Ser/Thr_deHydtase_PyrdxlP-BS;Thr_deHydtase_biosynth;TrpB-like_PLP-dep	PS00165;PS51672	ACT_LIKE;DEHYDRATASE_SER_THR	Threonine dehydratase		PF00291;PF00585	MM_CE	PD_CE	14	14	14	30.3	30.3	30.3	62.108		0	125.48	3180500000	34	0.000185249	9.69113	0	18.4165	C8V6Q6
19.2907	19.2762	19.4585	19.2453	18.9097	18.8871	19.0283	18.9832	20.2131	20.1459	20.3214	C8V6Q8	ANIA_03829		+	0.365606	3.13016	+	1.27474	5.45405	aldehyde dehydrogenase (NAD) activity;catalytic activity;oxidoreductase activity;oxidoreductase activity, acting on the aldehyde or oxo group of donors;oxidoreductase activity, acting on the aldehyde or oxo group of donors, NAD or NADP as acceptor;succinate-semialdehyde dehydrogenase [NAD(P)+] activity;succinate-semialdehyde dehydrogenase activity	amine metabolic process;catabolic process;cellular amino acid metabolic process;cellular ketone metabolic process;cellular metabolic process;cellular nitrogen compound metabolic process;cellular process;metabolic process;nitrogen compound metabolic process;organic acid metabolic process;primary metabolic process;small molecule metabolic process		Aldedh	IPR010102;IPR015590;IPR016160;IPR016161;IPR016162;IPR016163	Ald_DH/histidinol_DH;Ald_DH_C;Ald_DH_CS_CYS;Ald_DH_N;Aldehyde_DH_dom;Succ_semiAld_DH	PS00070	ALDEHYDE_DEHYDR_CYS			PF00171	MM_CE	PD_CE	15	15	15	33.5	33.5	33.5	57.809		0	150.25	10299000000	32	0.000426521	6.30722	0	22.1094	C8V6Q8
19.8869	19.9536	19.9401	19.7144	19.8266	19.7018	19.7742	19.6966	20.293	20.2931	20.5664	C8V6R6	ANIA_10476		+	0.123936	1.01014	+	0.634383	3.17464	catalytic activity;oxidoreductase activity			IMPDH	IPR001093;IPR013785;IPR015875	Aldolase_TIM;IMP_DH/GMP_Rdtase_CS;IMP_DH_GMPRt	PS00487	IMP_DH_GMP_RED			PF00478	MM_CE	PD_CE	12	12	12	37.1	37.1	37.1	31.844		0	59.91	7582400000	40	0.0355679	1.96002	0.000350726	7.49361	C8V6R6
17.4952	17.666	17.053	17.35	17.1956	17.2139	16.9387	17.0534	17.9042	17.9011	18.117	C8V6R7	ANIA_11238		+	0.290651	1.03593	+	0.873704	3.5462	catalytic activity;IMP dehydrogenase activity;oxidoreductase activity;oxidoreductase activity, acting on CH-OH group of donors;oxidoreductase activity, acting on the CH-OH group of donors, NAD or NADP as acceptor	biosynthetic process;cellular metabolic process;cellular nitrogen compound metabolic process;cellular process;heterocycle metabolic process;metabolic process;nitrogen compound metabolic process;nucleobase-containing compound metabolic process;nucleobase-containing small molecule metabolic process;nucleotide metabolic process;primary metabolic process;small molecule metabolic process		IMPDH	IPR001093;IPR005990;IPR013785	Aldolase_TIM;IMP_DH;IMP_DH_GMPRt					PF00478	MM_CE	PD_CE	6	6	6	27.1	27.1	27.1	22.068		0	133.86	5380300000	11	0.0329755	2.00287	0.00024531	8.98906	C8V6R7
19.9055	19.6754	19.1359	19.6208	18.5965	18.6442	18.3598	18.4208	19.4642	19.1064	19.4423	C8V6S7	ANIA_03814		+	1.07908	3.07112	+	0.832296	2.92033	catalytic activity;cis-trans isomerase activity;isomerase activity;peptidyl-prolyl cis-trans isomerase activity	cellular metabolic process;cellular process;macromolecule metabolic process;metabolic process;primary metabolic process;protein folding;protein metabolic process		Pro_isomerase	IPR002130;IPR020892;IPR024936;IPR029000	Cyclophilin-like_dom;Cyclophilin-type_PPIase;Cyclophilin-type_PPIase_CS;Cyclophilin-type_PPIase_dom	PS00170;PS50072	CSA_PPIASE_1;CSA_PPIASE_2	Peptidyl-prolyl cis-trans isomerase		PF00160	MM_CE	PD_CE	4	4	4	23.5	23.5	23.5	23.616		0	67.987	18070000000	18	0.000511416	6.14731	0.000617886	6.59871	C8V6S7
19.0994	19.221	19.4539	19.0208	17.018	16.7743	16.75	16.8507	17.6426	17.7849	17.8432	C8V6S8	ANIA_03813		+	2.35052	6.11316	+	0.90864	3.8522	cation transmembrane transporter activity;copper ion transmembrane transporter activity;inorganic cation transmembrane transporter activity;ion transmembrane transporter activity;metal ion transmembrane transporter activity;substrate-specific transmembrane transporter activity;substrate-specific transporter activity;transition metal ion transmembrane transporter activity;transmembrane transporter…			Ctr	IPR007274	Cop_transporter					PF04145	MM_CE	PD_CE	5	5	5	41.4	41.4	41.4	23.128		0	302.3	10428000000	16	0	20.949	0.00015619	10.4162	C8V6S8
16.74	16.9132	16.8058	16.6573	16.5513	16.4039	16.5237	16.5859	16.8745	16.8649	17.1401	C8V6T1	ANIA_03810		+	0.262877	2.11043	+	0.443635	2.38589	catalytic activity;CTD phosphatase activity;hydrolase activity;hydrolase activity, acting on ester bonds;phosphatase activity;phosphoprotein phosphatase activity;phosphoric ester hydrolase activity;protein serine/threonine phosphatase activity;protein tyrosine phosphatase activity	biological regulation;biosynthetic process;cellular metabolic process;cellular nitrogen compound metabolic process;cellular process;macromolecule metabolic process;macromolecule modification;metabolic process;mRNA metabolic process;mRNA processing;nitrogen compound metabolic process;nucleobase-containing compound metabolic process;phosphorus metabolic process;primary metabolic process;protein dep…		Ssu72	IPR006811	RNA_pol_II_suA					PF04722	MM_CE	PD_CE	4	4	4	25.1	25.1	25.1	28.949		0	44.735	450270000	8	0.00262983	3.92528	0.00167582	4.99778	C8V6T1
16.0415	15.9906	15.5939	15.8699	16.1808	16.3561	16.0823	16.1907	16.2424	16.2854	16.4146	C8V6T2	ANIA_03809		+	-0.328503	1.53825		0.111649	0.655302	catalytic activity;hydrolase activity;hydrolase activity, acting on carbon-nitrogen (but not peptide) bonds;hydrolase activity, acting on carbon-nitrogen (but not peptide) bonds, in linear amides;nicotinamidase activity	aging;biological regulation;cellular process;developmental process;gene silencing;regulation of gene expression, epigenetic		Isochorismatase	IPR000868	Isochorismatase-like					PF00857	MM_CE		2	2	2	14.2	14.2	14.2	16.488		0	4.6554	227600000	3	0.00906331	-2.85591	0.154582	1.39733	C8V6T2
19.8383	19.9199	19.903	19.8857	19.5695	19.6875	19.6966	19.6928	19.6519	19.656	19.3898	C8V6T4	ANIA_03807		+	0.225117	3.14801		-0.0956947	0.527724				Oxysterol_BP	IPR000648;IPR018494	Oxysterol-bd;Oxysterol-bd_CS	PS01013	OSBP			PF01237	MM_CE		22	22	22	42.4	42.4	42.4	57.708		0	138.64	6137500000	44	0.000432732	6.3562	0.256789	-1.16473	C8V6T4
19.1986	19.3685	19.2723	19.0752	18.2132	18.4107	18.4729	18.4281	18.3981	18.391	18.3469	C8V6T6	ANIA_03805		+	0.847449	4.24503		-0.00252883	0.0121872	catalytic activity				IPR015813;IPR018523	Isocitrate_lyase_ph_CS;Pyrv/PenolPyrv_Kinase-like_dom	PS00161	ISOCITRATE_LYASE				MM_CE		8	8	8	31.4	31.4	31.4	25.244		0	168.01	1900200000	13	0.000205714	10.0318	0.978819	-0.036458	C8V6T6
14.4923	14.4202	14.0721	14.3477	14.4169	14.3772	14.262	14.309	14.3094	14.5476	14.7177	C8V6U5	ANIA_03797			-0.00819254	0.028634		0.183623	0.8317	adenyl nucleotide binding;adenyl ribonucleotide binding;ATP binding;ATPase activity;ATPase activity, coupled;ATP-dependent DNA helicase activity;ATP-dependent helicase activity;binding;catalytic activity;DNA binding;DNA helicase activity;DNA-dependent ATPase activity;helicase activity;hydrolase activity;hydrolase activity, acting on acid anhydrides;hydrolase activity, acting on acid anhydrides, i…	cellular metabolic process;cellular nitrogen compound metabolic process;cellular process;DNA metabolic process;DNA recombination;DNA repair;macromolecule metabolic process;metabolic process;nitrogen compound metabolic process;nucleobase-containing compound metabolic process;primary metabolic process;response to abiotic stimulus;response to DNA damage stimulus;response to stimulus;response to stre…		UvrD_C;UvrD-helicase	IPR000212;IPR013986;IPR014016;IPR014017;IPR027417	DExx_box_DNA_helicase_dom;DNA_helicase_UvrD/REP;DNA_helicase_UvrD-like_C;P-loop_NTPase;UvrD-like_ATP-bd	PS51198;PS51217	UVRD_HELICASE_ATP_BIND;UVRD_HELICASE_CTER			PF00580;PF13361			1	1	1	0.7	0.7	0.7	111.37	+	1	-2	18915000000	1	0.897616	-0.0834682	0.0817649	1.71328	C8V6U5
17.4411	17.311	17.2014	18.8842	18.531	18.7029	18.567	18.4239	17.6631	17.8368	17.3499	C8V6X6	ANIA_08163		+	-0.84673	1.10818	+	-0.939562	2.9927	catalytic activity;oxidoreductase activity				IPR002198;IPR002347;IPR016040	DH_sc/Rdtase_SDR;Glc/ribitol_DH;NAD(P)-bd_dom						MM_CE	PD_CE	5	5	5	19.1	19.1	19.1	26.4		0	11.376	972950000	7	0.0268991	-2.12308	0.000500952	-6.84368	C8V6X6
18.1695	18.1806	18.2207	18.1142	17.9549	17.9514	17.7893	17.8922	17.8899	17.9033	17.912	C8V714	ANIA_03779		+	0.274266	3.0793		0.00474691	0.0353123	catalytic activity;exopolyphosphatase activity;hydrolase activity;hydrolase activity, acting on acid anhydrides;hydrolase activity, acting on acid anhydrides, in phosphorus-containing anhydrides;pyrophosphatase activity	catabolic process;cellular metabolic process;cellular process;metabolic process;phosphorus metabolic process		DHH;DHHA2	IPR001667;IPR004097	DDH_dom;DHHA2					PF01368;PF02833	MM_CE		10	10	10	22	22	22	50.085		0	112.69	1693500000	13	0.000443279	6.16929	0.941547	0.103077	C8V714
17.5297	17.6025	17.4608	16.8984	16.6819	16.6073	16.5799	16.7203	17.5582	17.6054	18.117	C8V723	ANIA_10445		+	0.725489	2.35109	+	1.11285	3.09431	ion transmembrane transporter activity;substrate-specific transmembrane transporter activity;substrate-specific transporter activity;transmembrane transporter activity;transporter activity			Mtc	IPR004686	Mtc			Probable mitochondrial transport protein		PF03820	MM_CE	PD_CE	7	7	7	23.5	23.5	23.5	35.405		0	16.199	664090000	10	0.00182595	4.42319	0.000398577	7.2005	C8V723
18.0741	18.0493	18.0522	18.0455	17.9319	17.9947	17.8326	17.8898	18.1495	18.036	18.2718	C8V725	ANIA_03771		+	0.143036	2.20224	+	0.240161	1.73293				DUF814	IPR008532	DUF814					PF05670	MM_CE	PD_CE	7	7	7	20	20	20	26.177		0	14.53	2368400000	10	0.00224749	4.1113	0.00713275	3.43698	C8V725
16.1766	16.0595	16.0179	15.9038	15.7721	15.8568	15.5252	15.6467	16.525	16.1789	16.4236	C8V730	ANIA_10467		+	0.339246	1.9928	+	0.675619	2.58753	binding;cation binding;ion binding;metal ion binding;nucleic acid binding transcription factor activity;sequence-specific DNA binding RNA polymerase II transcription factor activity;sequence-specific DNA binding transcription factor activity;transition metal ion binding;zinc ion binding			Fungal_trans_2;Zn_clus	IPR001138;IPR021858	DUF3468;Zn2-C6_fun-type_DNA-bd	PS00463;PS50048	ZN2_CY6_FUNGAL_1;ZN2_CY6_FUNGAL_2			PF00172;PF11951	MM_CE	PD_CE	2	2	2	7.2	7.2	7.2	46.001		0	10.132	46099000	2	0.00331724	3.69344	0.00101446	5.56175	C8V730
17.9291	17.9594	17.5308	17.7896	18.1251	18.1889	18.3894	18.465	17.9497	18.0322	17.5738	C8V731	ANIA_10444		+	-0.489895	2.08156	+	-0.440209	1.47197	catalytic activity;gamma-glutamyltransferase activity;transferase activity;transferase activity, transferring acyl groups;transferase activity, transferring amino-acyl groups	amine metabolic process;catabolic process;cellular amino acid metabolic process;cellular ketone metabolic process;cellular metabolic process;cellular nitrogen compound metabolic process;cellular process;metabolic process;nitrogen compound metabolic process;organic acid metabolic process;peptide metabolic process;primary metabolic process;small molecule metabolic process;sulfur compound metabolic …		G_glu_transpept	IPR000101;IPR029055	GGT_peptidase;Ntn_hydrolases_N						MM_CE	PD_CE	9	9	9	16.5	16.5	16.5	61.096		0	63.988	2650600000	21	0.00284151	-3.86772	0.0132089	-2.90153	C8V731
18.3914	18.432	18.3499	18.2074	18.0353	17.9861	17.9932	17.9259	18.251	18.2681	18.2262	C8V733	ANIA_10457		+	0.360043	3.26655	+	0.263282	3.60025	binding;DNA binding;nucleic acid binding	response to abiotic stimulus;response to stimulus										MM_CE	PD_CE	18	18	18	26.3	26.3	26.3	85.203		0	111.73	920860000	22	0.000447186	6.68898	0.000224583	9.22743	C8V733
16.2491	16.3066	16.3411	15.8737	16.1688	16.1265	16.0469	15.9482	16.4888	16.501	16.5409	C8V738	ANIA_03761			0.120069	0.456334	+	0.437648	3.156	binding;cation binding;ion binding;metal ion binding;nucleic acid binding;nucleic acid binding transcription factor activity;sequence-specific DNA binding transcription factor activity;transition metal ion binding;zinc ion binding			R3H	IPR000967;IPR001374;IPR001841;IPR019786	R3H_ss-bd;Zinc_finger_PHD-type_CS;Znf_NFX1;Znf_RING	PS01359;PS51061	R3H;ZF_PHD_1			PF01422;PF01424		PD_CE	7	7	7	7.5	7.5	7.5	128.16		0	45.792	361670000	8	0.179796	1.01409	0.000380649	7.42468	C8V738
20.9109	20.8183	20.7538	20.7926	20.5006	20.4181	20.472	20.2737	20.4979	20.5313	20.491	C8V742	ANIA_08182		+	0.402801	3.25508		0.0905857	0.709464	1-phosphatidylinositol binding;binding;catalytic activity;GTP binding;GTPase activity;guanyl nucleotide binding;guanyl ribonucleotide binding;hydrolase activity;hydrolase activity, acting on acid anhydrides;hydrolase activity, acting on acid anhydrides, in phosphorus-containing anhydrides;lipid binding;nucleoside-triphosphatase activity;nucleotide binding;phosphatidylinositol binding;phosphatidyl…	biological regulation;cellular component assembly;cellular component organization;cellular localization;cellular macromolecular complex assembly;cellular process;cytokinesis;establishment or maintenance of cell polarity;localization;macromolecular complex assembly;protein complex assembly;regulation of protein modification process		Septin	IPR016491;IPR027417;IPR030379	G_SEPTIN_dom;P-loop_NTPase;Septin	PS51719	G_SEPTIN			PF00735	MM_CE		25	24	24	54.7	52.3	52.3	44.304		0	323.31	65136000000	81	0.000441065	6.6562	0.125478	1.49471	C8V742
18.4803	18.6668	18.5614	18.18	18.1508	18.0752	18.0836	18.151	19.0468	19.0164	19.5375	C8V743	ANIA_08183		+	0.356946	1.81057	+	1.08506	3.19465	binding;nucleic acid binding;RNA binding;snoRNA binding	cellular component assembly;cellular component organization;cellular macromolecular complex assembly;cellular metabolic process;cellular nitrogen compound metabolic process;cellular process;establishment or maintenance of cell polarity;macromolecular complex assembly;macromolecule metabolic process;metabolic process;nitrogen compound metabolic process;nucleobase-containing compound metabolic proc…		Utp12;WD40	IPR001680;IPR007148;IPR015943;IPR017986;IPR019775;IPR020472;IPR027145	G-protein_beta_WD-40_rep;PWP2;SSU_processome_Utp12;WD40/YVTN_repeat-like_dom;WD40_repeat;WD40_repeat_CS;WD40_repeat_dom	PS00678;PS50082;PS50294	WD_REPEATS_1;WD_REPEATS_2;WD_REPEATS_REGION			PF00400;PF04003	MM_CE	PD_CE	16	16	16	20.2	20.2	20.2	93.439		0	53.278	860400000	22	0.00503393	3.34747	0.00032	7.56819	C8V743
16.672	16.3987	16.8107	17.0049	17.3735	17.3555	17.3558	17.2551	16.5855	16.5513	16.6798	C8V745	ANIA_11053		+	-0.613422	2.48183	+	-0.729465	4.77467	arylformamidase activity;catalytic activity;hydrolase activity;hydrolase activity, acting on carbon-nitrogen (but not peptide) bonds;hydrolase activity, acting on carbon-nitrogen (but not peptide) bonds, in linear amides	amine metabolic process;catabolic process;cellular amino acid metabolic process;cellular aromatic compound metabolic process;cellular ketone metabolic process;cellular metabolic process;cellular nitrogen compound metabolic process;cellular process;heterocycle metabolic process;metabolic process;nitrogen compound metabolic process;organic acid metabolic process;primary metabolic process;small mole…		Cyclase	IPR007325	KFase					PF04199	MM_CE	PD_CE	6	6	6	13.6	13.6	13.6	37.838		0	14.936	421960000	8	0.00155643	-4.70838	0	-16.1079	C8V745
20.5427	20.6439	20.627	20.5437	20.295	20.2215	20.3081	20.3978	20.6781	20.727	20.8358	C8V746	ANIA_11052		+	0.283765	3.12682	+	0.441375	3.20952	5'-3' exonuclease activity;5'-3' exoribonuclease activity;binding;catalytic activity;cation binding;chromatin binding;endonuclease activity;endonuclease activity, active with either ribo- or deoxyribonucleic acids and producing 5'-phosphomonoesters;endoribonuclease activity;endoribonuclease activity, producing 5'-phosphomonoesters;exonuclease activity;exonuclease activity, active with either ribo…	biological regulation;catabolic process;cellular metabolic process;cellular nitrogen compound metabolic process;cellular process;macromolecule metabolic process;metabolic process;mRNA metabolic process;nitrogen compound metabolic process;nucleobase-containing compound metabolic process;primary metabolic process;regulation of cell cycle;regulation of mitotic cell cycle;RNA catabolic process;RNA me…		XRN_N	IPR004859;IPR016494;IPR027073	5_3_exoribonuclease;5_3_exoribonuclease_1;Put_53exo			5'-3' exoribonuclease 1		PF03159;PF17846;PF18129;PF18194;PF18332;PF18334	MM_CE	PD_CE	42	42	42	28.8	28.8	28.8	157.59		0	203.43	11487000000	66	0.000425068	6.29808	0.000323188	7.62404	C8V746
19.2078	19.3272	19.2237	19.2177	19.1855	19.1167	19.2125	19.395	19.2131	19.2182	19.2805	C8V748	ANIA_08187			0.0166531	0.0925118		0.00983318	0.0469617		biological regulation;cellular component organization;cellular metabolic process;cellular process;chromatin modification;chromatin organization;chromosome organization;gene silencing;histone modification;macromolecule metabolic process;macromolecule modification;metabolic process;organelle organization;peptidyl-amino acid modification;primary metabolic process;protein acylation;protein metabolic …		CAF1C_H4-bd;WD40	IPR001680;IPR015943;IPR017986;IPR019775;IPR020472;IPR022052	G-protein_beta_WD-40_rep;Histone-bd_RBBP4_N;WD40/YVTN_repeat-like_dom;WD40_repeat;WD40_repeat_CS;WD40_repeat_dom	PS00678;PS50082;PS50294	WD_REPEATS_1;WD_REPEATS_2;WD_REPEATS_REGION			PF00400;PF12265			12	12	12	39.2	39.2	39.2	46.198		0	307.63	6361900000	52	0.700571	0.253773	0.923564	0.135493	C8V748
18.1848	18.3908	18.3133	18.0314	17.7346	17.726	17.8722	17.7931	18.8075	18.8434	18.9182	C8V749	ANIA_08188		+	0.448588	2.71308	+	1.07488	5.46647	binding;catalytic activity;cation binding;cyclohydrolase activity;GTP binding;GTP cyclohydrolase activity;GTP cyclohydrolase I activity;guanyl nucleotide binding;guanyl ribonucleotide binding;hydrolase activity;hydrolase activity, acting on carbon-nitrogen (but not peptide) bonds;hydrolase activity, acting on carbon-nitrogen (but not peptide) bonds, in cyclic amidines;ion binding;metal ion bindin…	biosynthetic process;cellular aromatic compound metabolic process;cellular metabolic process;cellular nitrogen compound metabolic process;cellular process;cofactor metabolic process;heterocycle metabolic process;metabolic process;nitrogen compound metabolic process		GTP_cyclohydroI	IPR001474;IPR018234;IPR020602	GTP_CycHdrlase_I;GTP_CycHdrlase_I_CS;GTP_CycHdrlase_I_dom	PS00859;PS00860	GTP_CYCLOHYDROL_1_1;GTP_CYCLOHYDROL_1_2			PF01227	MM_CE	PD_CE	12	12	12	36.5	36.5	36.5	36.252		0	190.33	1836700000	16	0.000985507	5.24124	0	22.2373	C8V749
18.7129	18.8584	18.3971	19.0199	18.2793	18.4164	18.2318	18.3563	18.1846	18.3885	18.2459	C8V751	ANIA_08190		+	0.426164	1.66149		-0.0479341	0.281003	adenyl nucleotide binding;adenyl ribonucleotide binding;ATP binding;binding;catalytic activity;cyclin-dependent protein kinase activity;kinase activity;nucleotide binding;phosphotransferase activity, alcohol group as acceptor;protein kinase activity;protein serine/threonine kinase activity;purine nucleotide binding;purine ribonucleoside triphosphate binding;purine ribonucleotide binding;ribonucle…	biological regulation;cellular metabolic process;cellular nitrogen compound metabolic process;cellular process;macromolecule metabolic process;macromolecule modification;metabolic process;mRNA metabolic process;mRNA processing;nitrogen compound metabolic process;nucleobase-containing compound metabolic process;peptidyl-amino acid modification;phosphorus metabolic process;primary metabolic process…		Pkinase	IPR000719;IPR002290;IPR008271;IPR011009;IPR017441	Kinase-like_dom;Prot_kinase_dom;Protein_kinase_ATP_BS;Ser/Thr_dual-sp_kinase;Ser/Thr_kinase_AS	PS00107;PS00108;PS50011	PROTEIN_KINASE_ATP;PROTEIN_KINASE_DOM;PROTEIN_KINASE_ST			PF00069	MM_CE		17	17	17	19.5	19.5	19.5	123.55		0	103.65	712800000	18	0.00700518	3.07499	0.550563	-0.685352	C8V751
15.9926	16.0349	16.1781	16.1336	15.9345	15.7936	15.9231	15.9403	15.8949	15.8619	15.9475	C8V754	ANIA_08193		+	0.186916	1.82705		0.00355275	0.0260267				AIG2	IPR009288;IPR013024	AIG2-like;Butirosin_synth_BtrG-like					PF06094	MM_CE		4	4	4	21	21	21	25.16		0	49.021	518690000	4	0.00493876	3.37814	0.955885	0.0767066	C8V754
18.9211	18.9735	18.9024	19.0084	19.2123	19.3378	19.2854	19.493	18.7329	18.6897	18.7341	C8V755	ANIA_09460		+	-0.380758	2.98828	+	-0.613197	3.45149	catalytic activity;hydrolase activity;peptidase activity	cellular metabolic process;cellular process;establishment of localization;macromolecule metabolic process;metabolic process;peptide metabolic process;primary metabolic process;protein maturation;protein metabolic process;protein targeting;protein transport;transport		SPC22	IPR007653	SPC22					PF04573	MM_CE	PD_CE	8	8	8	27.1	27.1	27.1	27.343		0	13.805	3520800000	16	0.000680172	-5.92818	0.000225914	-8.58477	C8V755
18.3491	18.6575	18.6241	18.3954	18.3375	18.2821	18.3531	18.4699	18.6154	18.5567	18.8829	C8V765	ANIA_08200			0.145858	0.830772	+	0.324322	1.70346											PF15932		PD_CE	7	7	7	50.9	50.9	50.9	18.088		0	135.3	4263100000	21	0.0574677	1.66164	0.0077064	3.37442	C8V765
18.877	18.8706	18.6741	18.8642	19.0314	19.2047	19.1385	19.098	18.7628	18.7063	18.5973	C8V766	ANIA_08201		+	-0.296651	2.54538	+	-0.429334	3.11083	adenyl nucleotide binding;adenyl ribonucleotide binding;ATP binding;ATPase activity;ATPase activity, coupled;ATP-dependent DNA helicase activity;ATP-dependent helicase activity;binding;catalytic activity;DNA binding;DNA helicase activity;DNA-dependent ATPase activity;helicase activity;hydrolase activity;hydrolase activity, acting on acid anhydrides;hydrolase activity, acting on acid anhydrides, i…	biological regulation;biosynthetic process;cellular component organization;cellular metabolic process;cellular nitrogen compound metabolic process;cellular process;establishment of localization;macromolecule metabolic process;macromolecule modification;metabolic process;nitrogen compound metabolic process;nuclear transport;nucleobase-containing compound metabolic process;nucleobase-containing com…		Helicase_C;ResIII	IPR001161;IPR001650;IPR006935;IPR014001;IPR027417	Helicase/UvrB_dom;Helicase_ATP-bd;Helicase_C;Helicase_Ercc3;P-loop_NTPase	PS51192;PS51194	HELICASE_ATP_BIND_1;HELICASE_CTER			PF04851;PF13625;PF16203	MM_CE	PD_CE	9	9	9	11.2	11.2	11.2	92.773		0	28.572	729470000	18	0.00140227	-4.85108	0.000368123	-7.25995	C8V766
16.9996	17.116	17.2064	16.8048	16.2854	16.2766	16.0782	16.2688	17.5048	17.4463	17.6532	C8V778	ANIA_08213		+	0.804461	3.7062	+	1.30752	4.85247	adenyl nucleotide binding;adenyl ribonucleotide binding;ATP binding;binding;catalytic activity;kinase activity;nucleobase-containing compound kinase activity;nucleotide binding;nucleotide kinase activity;phosphotransferase activity, phosphate group as acceptor;purine nucleotide binding;purine ribonucleoside triphosphate binding;purine ribonucleotide binding;ribonucleotide binding;thymidylate kina…	biosynthetic process;cellular metabolic process;cellular nitrogen compound metabolic process;cellular process;heterocycle metabolic process;metabolic process;nitrogen compound metabolic process;nucleobase-containing compound metabolic process;nucleobase-containing small molecule metabolic process;nucleotide metabolic process;phosphorus metabolic process;primary metabolic process;small molecule me…			IPR018094;IPR018095;IPR027417	P-loop_NTPase;Thymidylate_kin_CS;Thymidylate_kinase	PS01331	THYMIDYLATE_KINASE			PF02223	MM_CE	PD_CE	4	4	4	17.9	17.9	17.9	24.355		0	27.479	283350000	6	0.00031931	8.04887	0	16.7051	C8V778
20.7093	20.783	20.8687	20.7863	20.8939	20.9107	20.9783	21.1101	20.8685	20.8358	20.7464	C8V782	ANIA_11054		+	-0.186429	1.7102	+	-0.156364	1.20071	alpha-glucosidase activity;binding;carbohydrate binding;catalytic activity;glucan 1,3-alpha-glucosidase activity;glucosidase activity;hydrolase activity;hydrolase activity, acting on glycosyl bonds;hydrolase activity, hydrolyzing O-glycosyl compounds	carbohydrate metabolic process;cell wall organization or biogenesis;cellular cell wall organization or biogenesis;cellular metabolic process;cellular process;metabolic process;oligosaccharide metabolic process;primary metabolic process		Gal_mutarotas_2;Glyco_hydro_31	IPR000322;IPR011013;IPR017853;IPR025887;IPR030458	Gal_mutarotase_SF_dom;Glyco_hydro_31;Glyco_hydro_31_AS;Glyco_hydro_31_N_dom;Glycoside_hydrolase_SF	PS00129	GLYCOSYL_HYDROL_F31_1			PF01055;PF13802	MM_CE	PD_CE	28	28	28	26.3	26.3	26.3	105.33		0	169.37	7736100000	60	0.00628908	-3.16305	0.0268873	-2.3822	C8V782
18.3022	18.2356	18.1982	18.4192	18.1722	18.2768	18.2196	18.2332	17.6717	17.851	17.6317	C8V784	ANIA_11058			0.063314	0.556053	+	-0.507322	3.35662													PD_CE	13	13	13	44.5	44.5	44.5	34.659		0	153.29	6060300000	20	0.13057	1.1929	0.000241677	-8.19609	C8V784
14.8864	14.9324	14.9303	15.1541	14.331	14.4632	14.4357	14.7315	16.4782	15.7316	15.1809	C8V785	ANIA_11059		+	0.485478	2.45397	+	1.30658	1.96701	catalytic activity;chitinase activity;endochitinase activity;hydrolase activity;hydrolase activity, acting on glycosyl bonds;hydrolase activity, hydrolyzing O-glycosyl compounds	carbohydrate metabolic process;metabolic process;primary metabolic process		Glyco_hydro_18	IPR001223;IPR001579;IPR013781;IPR017853	Glyco_hydro_18_chit_AS;Glyco_hydro_catalytic_dom;Glyco_hydro18cat;Glycoside_hydrolase_SF	PS01095	CHITINASE_18			PF00704	MM_CE	PD_CE	1	1	1	1.7	1.7	1.7	57.246		0.0055547	2.021	100810000	2	0.00155508	4.64669	0.00419916	3.95569	C8V785
16.7013	16.7507	17.054	16.7853	16.6963	16.7046	16.8087	16.7961	16.4233	16.4039	16.7147	C8V790	ANIA_03757			0.0713749	0.36679	+	-0.23749	1.32031				Abhydrolase_5	IPR029058;IPR029059	AB_hydrolase;AB_hydrolase_5					PF12146		PD_CE	6	6	6	20.8	20.8	20.8	33.908		0	17.206	1517500000	9	0.243087	0.846486	0.019356	-2.60723	C8V790
17.5034	17.2719	17.3707	17.4799	17.395	17.3788	17.2756	17.3349	17.0815	17.039	17.2301	C8V793	ANIA_10456			0.0604272	0.455663	+	-0.229201	1.96931	catalytic activity;cysteine-type peptidase activity;hydrolase activity;NEDD8-specific protease activity;peptidase activity;peptidase activity, acting on L-amino acid peptides;small conjugating protein-specific protease activity	anatomical structure formation involved in morphogenesis;cell differentiation;cellular metabolic process;cellular process;developmental process;macromolecule metabolic process;macromolecule modification;metabolic process;primary metabolic process;protein metabolic process;protein modification by small protein conjugation or removal;protein modification process;reproduction;response to abiotic sti…		Peptidase_C48	IPR003653	Peptidase_C48	PS50600	ULP_PROTEASE			PF02902		PD_CE	6	6	6	19	19	19	29.468		0	15.892	892010000	8	0.180268	1.01286	0.00417245	-3.961	C8V793
18.9921	19.0518	18.9988	18.9904	19.0111	19.0111	18.8704	18.8822	18.9634	18.8856	18.8679	C8V794	ANIA_10442			0.0645909	0.764618		-0.0380901	0.30204	enzyme regulator activity;GTPase regulator activity;guanyl-nucleotide exchange factor activity;nucleoside-triphosphatase regulator activity;Ras guanyl-nucleotide exchange factor activity;Rho guanyl-nucleotide exchange factor activity;small GTPase regulator activity	biological regulation;cellular process;response to stimulus;signal transduction		BAR;RhoGEF	IPR000219;IPR001331;IPR004148;IPR027267	AH/BAR-dom;BAR_dom;DH-domain;GDS_CDC24_CS	PS00741;PS50010;PS51021	BAR;DH_1;DH_2			PF00621			34	34	34	17.5	17.5	17.5	211.41		0	136.04	1545700000	38	0.0693383	1.55075	0.522784	-0.728755	C8V794
19.4809	19.5031	19.4724	19.3362	19.2285	19.0447	19.1921	19.147	19.9827	19.7724	20.0658	C8V7A0	ANIA_03748		+	0.295056	2.76703	+	0.787205	3.56166	ATP phosphoribosyltransferase activity;binding;catalytic activity;cation binding;ion binding;magnesium ion binding;metal ion binding;transferase activity;transferase activity, transferring glycosyl groups;transferase activity, transferring pentosyl groups	amine metabolic process;biosynthetic process;cellular amino acid metabolic process;cellular ketone metabolic process;cellular metabolic process;cellular nitrogen compound metabolic process;cellular process;heterocycle metabolic process;metabolic process;nitrogen compound metabolic process;organic acid metabolic process;primary metabolic process;small molecule metabolic process		HisG;HisG_C	IPR001348;IPR011322;IPR013115;IPR013820;IPR015867;IPR018198;IPR020621	ATP_PRibTrfase_cat;ATP_PRibTrfase_CS;ATP_PRibTrfase_HisG;ATP_PRibTrfase_HisG_long;HisG_C;N-reg_PII/ATP_PRibTrfase_C;N-reg_PII-like_a/b	PS01316	ATP_P_PHORIBOSYLTR			PF01634;PF08029	MM_CE	PD_CE	12	12	12	34.5	34.5	34.5	32.951		0	70.643	15481000000	38	0.0008	5.37116	0.000215586	9.05666	C8V7A0
18.4049	18.4024	18.2804	18.4903	18.0557	18.2201	17.9778	17.9915	18.1226	18.3455	18.2533	C8V7A2	ANIA_03747		+	0.333225	2.49295	+	0.179197	1.04892	catalytic activity;prenyltransferase activity;protein geranylgeranyltransferase activity;protein prenyltransferase activity;Rab geranylgeranyltransferase activity;transferase activity;transferase activity, transferring alkyl or aryl (other than methyl) groups	biological regulation;cell communication;cellular metabolic process;cellular process;establishment of localization;Golgi vesicle transport;macromolecule metabolic process;macromolecule modification;metabolic process;primary metabolic process;protein metabolic process;protein modification process;protein targeting;protein transport;regulation of cell cycle;response to external stimulus;response to…		Prenyltrans	IPR001330;IPR008930;IPR026873	Prenyltrans;Ptb1;Terpenoid_cyclase/PrenylTrfase					PF00432	MM_CE	PD_CE	7	7	7	19.2	19.2	19.2	35.824		0	19.829	1308700000	11	0.00151205	4.73317	0.0415348	2.10358	C8V7A2
20.3819	20.3921	20.2001	20.4527	20.2923	20.278	20.4267	20.3841	20.1658	20.2113	20.1999	C8V7B0	ANIA_03739			0.0113964	0.0619256	+	-0.152953	1.75112	binding;nucleic acid binding;nucleotide binding			RRM_1	IPR000504;IPR012677	Nucleotide-bd_a/b_plait;RRM_dom	PS50102	RRM			PF00076		PD_CE	26	26	26	59.5	59.5	59.5	52.293		0	323.31	30049000000	66	0.78802	0.174635	0.00696338	-3.47589	C8V7B0
19.1806	19.1274	19.5211	19.9451	19.1199	19.2363	19.2208	19.2699	19.5207	18.8499	18.7282	C8V7C4	awh11			0.231836	0.566834		-0.178785	0.363759		response to stimulus;response to stress		HSP9_HSP12	IPR007250;IPR016360	Heat_shock_protein_9/12_fun;HSP9_HSP12					PF04119			7	7	7	65.2	65.2	65.2	9.7965		0	34.831	6901100000	19	0.126136	1.21185	0.444398	-0.852718	C8V7C4
18.1989	18.3803	18.2016	18.2233	17.861	17.8583	17.8632	17.9236	18.0006	18.1135	18.0798	C8V7C6	cog6		+	0.374508	3.72431	+	0.188118	2.60056		cellular process;establishment of localization;Golgi vesicle transport;protein targeting;protein transport;transport;vacuolar transport;vesicle-mediated transport			IPR010490	COG6			Conserved oligomeric Golgi complex subunit 6		PF06419	MM_CE	PD_CE	11	11	11	14.5	14.5	14.5	81.667		0	81.774	937500000	14	0.00028101	8.10953	0.000954868	5.59978	C8V7C6
19.2237	19.253	19.2379	19.1103	18.9292	18.9665	19.0362	19.112	19.2111	19.2196	19.2995	C8V7C7	aim24		+	0.195258	2.03139	+	0.232445	2.14066				AIM24	IPR002838;IPR016031	AIM24;Trp_RNA-bd_attenuator-like_dom			Altered inheritance of mitochondria protein 24, mitochondrial		PF01987	MM_CE	PD_CE	10	10	10	32.6	32.6	32.6	44.208		0	120.96	4622600000	21	0.00312068	3.76872	0.00288635	4.36834	C8V7C7
13.6538	13.7295	13.8658	13.8021	15.0685	15.3552	15.5129	15.8797	14.9584	14.6041	14.078	C8V7C8	ANIA_03722		+	-1.69127	4.15034	+	-0.90721	1.5695	transporter activity	cellular process;establishment of localization;ion transport;transmembrane transport;transport		MFS_1	IPR011701;IPR020846	MFS;MFS_dom	PS50850	MFS			PF07690	MM_CE	PD_CE	1	1	1	1.7	1.7	1.7	52.234		0.0024213	2.4487	59502000	1	0.000182741	-9.65485	0.0103733	-3.09695	C8V7C8
19.227	19.1448	19.1558	19.2785	19.0613	19.036	19.0917	19.0774	18.6948	18.7868	18.653	C8V7D1	mpkB		+	0.134912	2.15133	+	-0.355068	3.74123	adenyl nucleotide binding;adenyl ribonucleotide binding;ATP binding;binding;nucleotide binding;purine nucleotide binding;purine ribonucleoside triphosphate binding;purine ribonucleotide binding;ribonucleotide binding	amine metabolic process;anatomical structure development;anatomical structure formation involved in morphogenesis;anatomical structure morphogenesis;ascospore formation;biological regulation;biosynthetic process;cell development;cell differentiation;cellular amide metabolic process;cellular aromatic compound metabolic process;cellular ketone metabolic process;cellular metabolic process;cellular n…		Pkinase	IPR000719;IPR002290;IPR003527;IPR008271;IPR011009;IPR017441	Kinase-like_dom;MAP_kinase_CS;Prot_kinase_dom;Protein_kinase_ATP_BS;Ser/Thr_dual-sp_kinase;Ser/Thr_kinase_AS	PS00107;PS00108;PS01351;PS50011	MAPK;PROTEIN_KINASE_ATP;PROTEIN_KINASE_DOM;PROTEIN_KINASE_ST	Mitogen-activated protein kinase		PF00069	MM_CE	PD_CE	8	8	8	19.2	19.2	19.2	40.998		0	224.45	10623000000	31	0.00244919	4.00759	0.000141991	-9.87633	C8V7D1
17.7412	17.7049	17.7014	17.5881	17.3	17.2908	17.1615	17.2825	17.3619	17.4515	17.6814	C8V7D2	ANIA_10455		+	0.425201	4.01618	+	0.239585	1.37293	carbon-oxygen lyase activity;catalytic activity;hydro-lyase activity;lyase activity;uroporphyrinogen-III synthase activity	biosynthetic process;cellular metabolic process;cellular nitrogen compound metabolic process;cellular process;cofactor metabolic process;heterocycle metabolic process;metabolic process;nitrogen compound metabolic process;pigment metabolic process		HEM4	IPR003754	4pyrrol_synth_uPrphyn_synth					PF02602	MM_CE	PD_CE	7	7	7	24.8	24.8	24.8	34.423		0	20.17	476000000	8	0.000160714	9.14247	0.0168737	2.70812	C8V7D2
19.9779	19.9084	19.9072	19.7928	20.0066	20.1096	20.0434	20.1017	20.2797	20.3727	20.3111	C8V7D3	ANIA_10440		+	-0.168749	2.00075	+	0.255833	3.01645	catalytic activity;NADH dehydrogenase activity;oxidoreductase activity;oxidoreductase activity, acting on NADH or NADPH	metabolic process			IPR016040	NAD(P)-bd_dom					PF01370	MM_CE	PD_CE	18	18	17	44.8	44.8	42.9	43.6		0	196.23	12757000000	49	0.00325287	-3.70888	0.000455818	6.92572	C8V7D3
20.6685	20.6328	20.4963	20.5192	20.5531	20.4865	20.4444	20.2971	20.8588	20.8713	20.975	C8V7E4	ANIA_08224		+	0.13391	1.00411	+	0.456393	2.8642	adenyl nucleotide binding;adenyl ribonucleotide binding;aminoacyl-tRNA ligase activity;ATP binding;binding;catalytic activity;glutamate-tRNA ligase activity;ligase activity;ligase activity, forming aminoacyl-tRNA and related compounds;ligase activity, forming carbon-oxygen bonds;nucleotide binding;purine nucleotide binding;purine ribonucleoside triphosphate binding;purine ribonucleotide binding;r…	amine metabolic process;cellular amino acid metabolic process;cellular ketone metabolic process;cellular metabolic process;cellular nitrogen compound metabolic process;cellular process;macromolecule metabolic process;metabolic process;nitrogen compound metabolic process;nucleobase-containing compound metabolic process;organic acid metabolic process;primary metabolic process;RNA metabolic process;…		GST_C_3;tRNA-synt_1c;tRNA-synt_1c_C	IPR000924;IPR004046;IPR004526;IPR010987;IPR011035;IPR014729;IPR020056;IPR020058;IPR020059;IPR020061	Glu/Gln-tRNA-synth;Glu/Gln-tRNA-synth_Ib_a-bdl;Glu/Gln-tRNA-synth_Ib_cat-dom;Glu/Gln-tRNA-synth_Ib_codon-bd;Glutathione-S-Trfase_C-like;Glu-tRNA-synth_arc/euk;GST_C;Rbsml_L25/Gln-tRNA_synth_b-brl;Ribosomal_L25/Gln-tRNA_synth;Rossmann-like_a/b/a_fold					PF00749;PF03950	MM_CE	PD_CE	28	28	28	32.1	32.1	32.1	77.059		0	194.69	20685000000	62	0.0359377	1.95001	0.000630113	6.41374	C8V7E4
14.7298	14.7024	14.4714	14.5323	14.4533	14.3634	14.4252	14.2774	14.9658	14.8172	14.6565	C8V7E6	ANIA_08226		+	0.229154	1.6653	+	0.433362	2.36263		cellular component organization;cellular process;establishment of localization;Golgi organization;organelle organization;protein transport;transport		COG2	IPR009316;IPR024602	COG_su2_N;COG2					PF06148	MM_CE	PD_CE	3	3	2	10.8	10.8	8	28.792		0.0066298	1.8999	116930000	2	0.00700749	3.08184	0.00171599	4.93554	C8V7E6
18.6507	18.6994	18.6695	18.2861	17.9681	17.8884	17.7931	17.8039	18.866	18.7839	19.1556	C8V7F0	ANIA_08229		+	0.713032	3.28956	+	1.07178	3.79022	channel activity;ion channel activity;ion transmembrane transporter activity;membrane insertase activity;passive transmembrane transporter activity;protein transporter activity;substrate-specific channel activity;substrate-specific transmembrane transporter activity;substrate-specific transporter activity;transmembrane transporter activity;transporter activity	cellular component assembly;cellular component organization;cellular localization;cellular macromolecular complex assembly;cellular membrane organization;cellular process;establishment of localization;localization;macromolecular complex assembly;membrane organization;mitochondrion organization;organelle organization;protein complex assembly;protein targeting;protein transport;transport		60KD_IMP	IPR001708	Membrane_insert_OXA1/ALB3/YidC					PF02096	MM_CE	PD_CE	11	11	10	20.4	20.4	18.5	54.5		0	50.974	1813500000	16	0.000454902	6.75516	0.00014882	10.1114	C8V7F0
16.1389	16.4345	16.458	15.7038	15.7764	15.7699	15.6621	15.874	14.8412	15.3951	14.7991	C8V7F1	ANIA_11061		+	0.413177	1.20399	+	-0.758802	2.19378	catalytic activity;transferase activity;transferase activity, transferring acyl groups;transferase activity, transferring acyl groups other than amino-acyl groups			Acyl_transf_3	IPR002656	Acyl_transf_3					PF01757	MM_CE	PD_CE	5	5	5	10.9	10.9	10.9	54.844		0	20.608	117250000	6	0.0208371	2.28327	0.00260154	-4.49982	C8V7F1
17.355	17.4249	17.4387	17.3562	17.3905	17.2496	17.3816	17.2905	17.4658	17.4835	17.4545	C8V7F2	ANIA_11056			0.0656328	0.793107	+	0.139859	1.70142	binding;chromatin binding	cellular component assembly;cellular component organization;cellular macromolecular complex assembly;cellular process;macromolecular complex assembly		TAFII28	IPR006809;IPR009072	Histone-fold;TAFII28					PF04719		PD_CE	10	10	10	41.6	41.6	41.6	38.699		0	292.05	470410000	12	0.0643057	1.5986	0.00778766	3.37011	C8V7F2
16.9988	16.978	17.2058	17.2744	17.6505	17.751	17.7078	18.2486	17.7521	17.8979	17.8097	C8V7G7	ANIA_11062		+	-0.725235	2.44732		-0.0195554	0.0403217	catalytic activity;deaminase activity			Ribonuc_L-PSP	IPR006056;IPR006175;IPR013813	Endoribo_LPSP/chorism_mut-like;YjgF/Yer057p/UK114;YjgF-like					PF01042	MM_CE		5	5	5	38.3	38.3	38.3	13.772		0	19.237	7021200000	7	0.00158429	-4.63202	0.932644	-0.117105	C8V7G7
17.2014	17.2453	17.187	17.1149	16.6742	16.6238	16.7741	16.7015	17.5094	17.2112	17.2609	C8V7G9	ANIA_08244		+	0.493733	4.67512	+	0.633722	3.14967		anatomical structure development;cell development;cellular process;developmental process										MM_CE	PD_CE	11	11	11	13.8	13.8	13.8	91.039		0	21.991	274070000	12	0	11.9181	0.000378636	7.40144	C8V7G9
18.633	18.6644	18.6403	18.6531	18.8607	18.9899	19.0704	19.1414	18.8004	18.7317	18.7848	C8V7H1	ANIA_11069		+	-0.36791	3.04291	+	-0.243289	1.6768	binding;carbohydrate binding;catalytic activity;chitin binding;chitinase activity;hydrolase activity;hydrolase activity, acting on glycosyl bonds;hydrolase activity, hydrolyzing O-glycosyl compounds;pattern binding;polysaccharide binding	amine metabolic process;carbohydrate metabolic process;catabolic process;macromolecule metabolic process;metabolic process;nitrogen compound metabolic process;polysaccharide metabolic process;primary metabolic process		PhoD	IPR018946;IPR029052	Alk_phosphatase_PhoD-like;Metallo-depent_PP-like					PF09423	MM_CE	PD_CE	16	16	16	24.7	24.7	24.7	66.115		0	56.947	3221300000	31	0.000624602	-6.07202	0.00823252	-3.3183	C8V7H1
17.476	17.6174	17.4674	17.4092	16.595	16.5803	16.4944	16.7403	16.2634	16.6264	16.4265	C8V7H9	ANIA_11064		+	0.890041	4.93043		-0.163697	0.732581				Glyco_hydro_71	IPR005197	Glyco_hydro_71					PF03659	MM_CE		5	5	5	19.2	19.2	19.2	47.556		0	54.317	735200000	5	0	13.1879	0.115179	-1.53613	C8V7H9
19.5556	19.3445	19.3172	19.5676	19.5337	19.7246	19.5661	19.6789	19.3276	19.3737	19.2102	C8V7I0	ANIA_11070		+	-0.179589	1.1678	+	-0.32198	2.30469	aminopeptidase activity;binding;catalytic activity;cation binding;exopeptidase activity;hydrolase activity;ion binding;metal ion binding;metalloaminopeptidase activity;metalloexopeptidase activity;metallopeptidase activity;peptidase activity;peptidase activity, acting on L-amino acid peptides;transition metal ion binding;zinc ion binding			Peptidase_M18	IPR001948;IPR023358	Peptidase_M18;Peptidase_M18_dom2					PF02127	MM_CE	PD_CE	13	13	13	25.6	25.6	25.6	56.783		0	56.74	9524900000	27	0.0225664	-2.22262	0.00191974	-4.78287	C8V7I0
18.2819	18.3819	18.2314	17.9716	17.9971	18.0885	17.9021	17.9684	18.4732	18.3924	18.8006	C8V7I2	ANIA_08254		+	0.22765	1.26148	+	0.566375	2.37488	binding;nucleic acid binding;RNA binding;snoRNA binding	cellular metabolic process;cellular nitrogen compound metabolic process;cellular process;macromolecule metabolic process;macromolecule modification;metabolic process;nitrogen compound metabolic process;nucleobase-containing compound metabolic process;primary metabolic process;RNA metabolic process;RNA modification;RNA processing;rRNA processing		Nop10p	IPR007264	H/ACA_rnp_Nop10					PF04135	MM_CE	PD_CE	6	6	6	50.7	50.7	50.7	7.7328		0	19.877	1847700000	9	0.0181126	2.38001	0.00169507	4.96824	C8V7I2
17.9473	18.0559	17.9499	17.7292	17.3444	17.281	17.3309	17.4326	17.6593	17.7346	17.8812	C8V7I8	ANIA_11065		+	0.573372	3.56616	+	0.411164	2.80575	catalytic activity;intramolecular transferase activity;isomerase activity			Prenyltrans	IPR001330;IPR002365;IPR008930;IPR018333	Prenyltrans;Squalene_cyclase;Terpene_synthase_CS;Terpenoid_cyclase/PrenylTrfase	PS01074	TERPENE_SYNTHASES	Terpene cyclase/mutase family member		PF13243;PF13249	MM_CE	PD_CE	11	11	11	15	15	15	86.343		0	33.597	1078600000	15	0.000405405	7.59291	0.000657489	6.22563	C8V7I8
19.7815	19.8081	19.9096	19.8811	19.9125	19.8358	19.8797	19.8502	19.618	19.6808	19.7519	C8V7I9	ANIA_11071			-0.024488	0.296528	+	-0.185986	2.34255		biological regulation;cell communication;cell wall organization or biogenesis;cellular cell wall organization or biogenesis;cellular component assembly;cellular component organization;cellular macromolecular complex assembly;cellular process;chromosome organization;macromolecular complex assembly;organelle assembly;organelle organization;protein complex assembly;response to chemical stimulus;resp…		CS;SGS	IPR007052;IPR007699;IPR008978;IPR011990	CS_dom;HSP20-like_chaperone;SGS;TPR-like_helical_dom	PS51048;PS51203	CS;SGS			PF04969;PF05002		PD_CE	20	20	20	35	35	35	58.983		0	166.68	4161100000	32	0.312696	-0.70851	0.00184181	-4.88224	C8V7I9
17.8884	17.9358	18.0989	17.7962	18.3446	18.1412	18.2816	18.3894	17.8775	17.6248	19.0395	C8V7J0	ANIA_10439		+	-0.359375	2.30024		-0.108599	0.107388	catalytic activity;GPI-anchor transamidase activity;hydrolase activity	cellular metabolic process;cellular process;macromolecule metabolic process;macromolecule modification;metabolic process;primary metabolic process;protein metabolic process;protein modification process		Gaa1	IPR007246	Gaa1					PF04114	MM_CE		7	7	7	13.2	13.2	13.2	70.084		0	29.234	775910000	15	0.00203523	-4.31516	0.825566	-0.293502	C8V7J0
16.8863	16.7982	16.8009	16.4227	16.4103	16.3141	16.1818	16.2053	16.4326	16.6447	16.8267	C8V7J1	ANIA_10465		+	0.449162	2.08145	+	0.3568	1.58744	catalytic activity;endopeptidase activity;hydrolase activity;peptidase activity;peptidase activity, acting on L-amino acid peptides;serine hydrolase activity;serine-type endopeptidase activity;serine-type peptidase activity			Rhomboid	IPR022764	Peptidase_S54_rhomboid_dom					PF01694	MM_CE	PD_CE	6	6	6	25.6	25.6	25.6	30.195		0	65.314	969450000	9	0.00284052	3.8675	0.0100049	3.13348	C8V7J1
18.3411	18.5409	18.2811	18.4585	18.2357	18.5395	18.2684	18.4783	18.4217	18.5893	18.2881	C8V7J5	ANIA_11411			0.0248885	0.0953879		0.0525063	0.175316	structural constituent of ribosome;structural molecule activity	biosynthetic process;cellular metabolic process;cellular process;macromolecule metabolic process;metabolic process;primary metabolic process;protein metabolic process;translation		Ribosomal_S14	IPR001209;IPR018271	Ribosomal_S14;Ribosomal_S14_CS	PS00527	RIBOSOMAL_S14			PF00253			3	3	3	33.9	33.9	33.9	6.7188		0	8.4093	34454000000	13	0.691964	0.261015	0.711927	0.455484	C8V7J5
15.4707	15.5352	15.3861	15.2478	15.0935	15.0988	14.7578	14.9326	14.8841	14.9117	15.2877	C8V7J6	ANIA_03711		+	0.43927	2.29885		0.0571623	0.149048	catalytic activity;cysteine-type peptidase activity;hydrolase activity;peptidase activity;peptidase activity, acting on L-amino acid peptides;small conjugating protein-specific protease activity;ubiquitin-specific protease activity	catabolic process;cellular component organization;cellular metabolic process;cellular nitrogen compound metabolic process;cellular process;chromatin modification;chromatin organization;chromosome organization;histone modification;macromolecule metabolic process;macromolecule modification;metabolic process;nitrogen compound metabolic process;nucleobase-containing compound metabolic process;one-car…		UCH	IPR001394;IPR018200;IPR028889	Peptidase_C19_UCH;USP_CS;USP_dom	PS00972;PS50235	USP_1;USP_3			PF00443	MM_CE		1	1	1	1.9	1.9	1.9	53.847		0.0060146	1.9737	41482000	1	0.00205397	4.31223	0.753789	0.394468	C8V7J6
14.9849	14.9194	14.4329	14.8793	14.3843	14.3672	14.4716	14.3308	15.3538	14.9922	15.1628	C8V7J7	ANIA_03710		+	0.415674	1.74065	+	0.781108	3.37919	structural constituent of cytoskeleton;structural molecule activity	biological regulation;cellular component organization;cellular process;cytoskeleton organization;organelle organization;regulation of organelle organization		DASH_Dam1	IPR013962	DASH_Dam1					PF08653	MM_CE	PD_CE	2	2	2	8	8	8	22.156		0	4.1826	61713000	4	0.00593321	3.21857	0.000246077	8.28711	C8V7J7
19.7857	19.7104	19.5533	19.7119	19.6883	19.7772	19.7179	19.7364	19.9164	19.9346	19.8429	C8V7J8	ANIA_03709			-0.0396485	0.320872	+	0.168012	2.46729				CRAL_TRIO;CRAL_TRIO_N	IPR001251;IPR011074	CRAL/TRIO_N_dom;CRAL-TRIO_dom	PS50191	CRAL_TRIO			PF00650;PF03765		PD_CE	17	17	17	34.4	34.4	34.4	66.454		0	146.83	15256000000	32	0.28693	-0.757078	0.00143017	5.22009	C8V7J8
19.3527	19.3223	19.1772	19.4247	18.685	18.8962	18.6878	18.6579	18.9379	19.1218	18.8685	C8V7J9	ANIA_03708		+	0.587481	3.61336	+	0.244357	1.36188	catalytic activity;hydrolase activity	cellular metabolic process;cellular nitrogen compound metabolic process;cellular process;metabolic process;nitrogen compound metabolic process;nucleobase-containing compound metabolic process;nucleobase-containing small molecule metabolic process;nucleotide metabolic process;primary metabolic process;small molecule metabolic process		HIT	IPR001310;IPR011146;IPR019808	Histidine_triad_CS;Histidine_triad_HIT;HIT-like	PS00892;PS51084	HIT_1;HIT_2			PF01230	MM_CE	PD_CE	6	6	6	57.9	57.9	57.9	14.923		0	144.51	38234000000	37	0.000355289	7.7441	0.017279	2.68683	C8V7J9
20.146	20.2001	20.41	20.0128	20.0971	20.1406	20.1263	20.0589	20.5005	20.3977	20.8713	C8V7K1	ANIA_03706			0.0864878	0.461363	+	0.484089	1.96929				S10_plectin	IPR005326	S10_plectin_N					PF03501		PD_CE	12	12	12	51.6	51.6	51.6	17.655		0	26.313	53774000000	65	0.176871	1.02328	0.00417128	3.96095	C8V7K1
14.3558	14.4588	14.3767	14.1971	13.9839	13.967	13.8777	13.954	13.9967	13.9802	14.1158	C8V7K2	ANIA_10454		+	0.401466	3.28506		0.0852451	0.926475		biological regulation;cellular component organization;cellular metabolic process;cellular nitrogen compound metabolic process;cellular process;chromosome organization;DNA metabolic process;gene silencing;homeostatic process;macromolecule metabolic process;metabolic process;nitrogen compound metabolic process;nucleobase-containing compound metabolic process;organelle organization;primary metabolic…		Telomere_Sde2	IPR024974	Sde2_N					PF13019	MM_CE		2	2	2	6	6	6	32.274		0	5.6521	72109000	3	0.000452418	6.74217	0.0600296	1.88282	C8V7K2
17.2701	17.4773	17.458	17.1113	16.9778	16.8812	16.8532	16.9064	17.7736	17.7584	17.8812	C8V7K3	ANIA_10438		+	0.424525	2.47661	+	0.899704	5.22826	binding;catalytic activity;GTP binding;GTPase activity;guanyl nucleotide binding;guanyl ribonucleotide binding;hydrolase activity;hydrolase activity, acting on acid anhydrides;hydrolase activity, acting on acid anhydrides, in phosphorus-containing anhydrides;nucleoside-triphosphatase activity;nucleotide binding;purine nucleotide binding;purine ribonucleoside triphosphate binding;purine ribonucleo…	cellular process;metabolic process;ribosome biogenesis		MMR_HSR1	IPR006073;IPR027417	GTP_binding_domain;P-loop_NTPase						MM_CE	PD_CE	8	8	8	11	11	11	70.517		0	18.823	292240000	10	0.00155169	4.69679	0	19.9058	C8V7K3
NaN	NaN	NaN	NaN	NaN	NaN	NaN	NaN	NaN	NaN	NaN	C8V7L0	ANIA_03697			0	NaN		0	NaN	binding;catalytic activity;cation binding;ion binding;metal ion binding;oxidoreductase activity;transition metal ion binding;zinc ion binding				IPR002085	ADH_SF_Zn-type								1	1	1	2.9	2.9	2.9	34.256	+	1	-2	0	0	1	NaN	1	NaN	C8V7L0
20.03	20.0453	20.0252	19.9013	19.9316	19.8417	19.9011	19.9648	20.0877	20.1156	20.1659	C8V7L2	ANIA_03695		+	0.0906277	1.11766	+	0.213255	2.68743	anthranilate synthase activity;carbon-carbon lyase activity;catalytic activity;lyase activity;oxo-acid-lyase activity	amine metabolic process;anatomical structure development;biosynthetic process;cellular amino acid metabolic process;cellular aromatic compound metabolic process;cellular ketone metabolic process;cellular metabolic process;cellular nitrogen compound metabolic process;cellular process;developmental process;heterocycle metabolic process;metabolic process;nitrogen compound metabolic process;organic a…		Anth_synt_I_N;Chorismate_bind	IPR005256;IPR005801;IPR006805;IPR015890;IPR019999	ADC_synthase;Anth_synth_I_like;Anth_synth_I_N;Anth_synth_I_PabB;Chorismate_C					PF00425;PF04715	MM_CE	PD_CE	17	17	17	39.6	39.6	39.6	56.444		0	223.59	6454300000	39	0.0260278	2.13889	0.000832487	5.85839	C8V7L2
16.2286	16.3452	16.5194	16.2892	16.1822	16.2452	16.2361	16.2465	16.5845	16.2766	16.4029	C8V7L6	ANIA_03691		+	0.118075	0.932841	+	0.193796	1.27381	adenyl nucleotide binding;adenyl ribonucleotide binding;ATP binding;binding;nucleotide binding;purine nucleotide binding;purine ribonucleoside triphosphate binding;purine ribonucleotide binding;ribonucleotide binding			AAA	IPR003593;IPR003959;IPR003960;IPR027417	AAA+_ATPase;ATPase_AAA_core;ATPase_AAA_CS;P-loop_NTPase	PS00674	AAA			PF00004;PF09336	MM_CE	PD_CE	7	7	7	8.8	8.8	8.8	88.721		0	13.319	133070000	7	0.0433372	1.83163	0.0221891	2.51909	C8V7L6
16.6145	16.7485	16.6101	16.1743	15.511	15.4969	15.704	15.6145	16.0021	15.8587	16.1407	C8V7L7	ANIA_03690		+	0.955258	3.41422	+	0.41889	2.27414		establishment of localization;transport		Mito_carr	IPR018108;IPR023395	Mitochondrial_sb/sol_carrier;Mt_carrier_dom	PS50920	SOLCAR			PF00153	MM_CE	PD_CE	2	2	2	6	6	6	34.703		0	5.6753	1182400000	3	0.000405195	7.12285	0.0020365	4.70373	C8V7L7
18.639	18.5701	18.3725	18.4013	18.1118	18.0555	18.043	18.0149	18.2585	18.2731	18.1835	C8V7L8	ANIA_03689		+	0.439394	3.19373	+	0.182059	2.54543	acid-amino acid ligase activity;binding;catalytic activity;cation binding;ion binding;ligase activity;ligase activity, forming carbon-nitrogen bonds;metal ion binding;small conjugating protein ligase activity;transition metal ion binding;ubiquitin-protein ligase activity;zinc ion binding	cellular component organization;cellular metabolic process;cellular process;chromatin modification;chromatin organization;chromosome organization;histone modification;macromolecule metabolic process;macromolecule modification;metabolic process;organelle organization;primary metabolic process;protein metabolic process;protein modification by small protein conjugation or removal;protein modificatio…		IBR;zf-C3HC4	IPR001841;IPR002867;IPR013083;IPR017907;IPR018957	Znf_C3HC4_RING-type;Znf_C6HC;Znf_RING;Znf_RING/FYVE/PHD;Znf_RING_CS	PS00518;PS50089	ZF_RING_1;ZF_RING_2			PF00097;PF01485	MM_CE	PD_CE	10	10	10	16	16	16	58.958		0	26.809	1804700000	17	0.000450542	6.48297	0.00115946	5.44028	C8V7L8
19.1448	19.1084	19.1242	18.9402	18.9114	18.9481	18.9132	18.9551	19.3488	19.264	19.3937	C8V7L9	ANIA_10459		+	0.147418	1.64676	+	0.403532	4.08977	binding;catalytic activity;enzyme regulator activity;GTPase regulator activity;guanyl-nucleotide exchange factor activity;nucleic acid binding;nucleoside-triphosphatase regulator activity;nucleotidyltransferase activity;RNA binding;transferase activity;transferase activity, transferring phosphorus-containing groups;translation factor activity, nucleic acid binding;translation initiation factor ac…	biological regulation;regulation of translation		Hexapep;NTP_transferase;W2	IPR001451;IPR003307;IPR005835;IPR011004;IPR016021;IPR016024;IPR029044	ARM-type_fold;Hexapep_transf;MIF4-like_typ_1/2/3;NTP_transferase;Nucleotide-diphossugar_trans;Trimer_LpxA-like;W2_domain	PS51363	W2			PF00132;PF00483;PF02020	MM_CE	PD_CE	17	17	17	22.7	22.7	22.7	78.573		0	39.23	4192600000	31	0.00727532	3.04852	6.60377e-05	11.6653	C8V7L9
16.2269	16.5073	16.5847	16.0807	15.9552	15.7223	15.9918	16.0369	16.2025	16.1607	16.1496	C8V7M0	srrA		+	0.42338	1.66555	+	0.244391	1.47546	binding;DNA binding;molecular transducer activity;nucleic acid binding;nucleic acid binding transcription factor activity;RNA polymerase II core promoter proximal region sequence-specific DNA binding transcription factor activity;RNA polymerase II core promoter proximal region sequence-specific DNA binding transcription factor activity involved in positive regulation of transcription;sequence-spe…	anatomical structure formation involved in morphogenesis;biological regulation;cellular component organization;cellular process;developmental process;reproduction;response to abiotic stimulus;response to chemical stimulus;response to osmotic stress;response to oxidative stress;response to stimulus;response to stress;signal transduction;sporulation		HSF_DNA-bind;Response_reg	IPR000232;IPR001789;IPR011006;IPR011991;IPR014402;IPR027725	CheY-like_superfamily;HSF_DNA-bd;HSF_fam;Sig_transdc_resp-reg_receiver;Sig_transdc_resp-reg_Skn7;WHTH_DNA-bd_dom	PS00434;PS50110	HSF_DOMAIN;RESPONSE_REGULATORY			PF00072;PF00447	MM_CE	PD_CE	4	4	4	8.4	8.4	8.4	62.191		0	16.583	344720000	6	0.00700951	3.08228	0.0130946	2.90842	C8V7M0
19.1464	19.0878	18.965	18.7307	18.1009	18.2497	18.1012	18.2827	18.773	18.7072	18.6736	C8V7M1	ANIA_03687		+	0.798854	3.59622	+	0.534296	3.45964	catalytic activity;oxidoreductase activity			Redoxin	IPR012336;IPR013740	Redoxin;Thioredoxin-like_fold	PS51352	THIOREDOXIN_2			PF08534	MM_CE	PD_CE	7	7	7	37	37	37	19.6		0	78.911	8428900000	15	0.000351431	7.68892	0.000227273	8.6189	C8V7M1
15.2078	14.9595	15.0452	14.9939	14.696	14.7153	14.5883	14.453	15.0975	15.0648	15.3849	C8V7M2	ANIA_03686		+	0.438467	2.76892	+	0.569265	2.4341		biological regulation;cellular process;response to chemical stimulus;response to stimulus		BolA	IPR002634	BolA					PF01722	MM_CE	PD_CE	2	2	2	14.5	14.5	14.5	14.335		0.00082508	2.9284	185930000	2	0.000770833	5.37576	0.00154936	5.12858	C8V7M2
18.468	18.5644	18.8997	18.4528	18.3116	18.2124	18.1913	18.3146	18.5461	18.7044	19.047	C8V7M5	ANIA_10437		+	0.338806	1.67898	+	0.508402	1.95407	binding;catalytic activity;cation binding;cyclohydrolase activity;GTP binding;GTP cyclohydrolase activity;GTP cyclohydrolase I activity;guanyl nucleotide binding;guanyl ribonucleotide binding;hydrolase activity;hydrolase activity, acting on carbon-nitrogen (but not peptide) bonds;hydrolase activity, acting on carbon-nitrogen (but not peptide) bonds, in cyclic amidines;ion binding;metal ion bindin…	biosynthetic process;cellular aromatic compound metabolic process;cellular metabolic process;cellular nitrogen compound metabolic process;cellular process;cofactor metabolic process;heterocycle metabolic process;metabolic process;nitrogen compound metabolic process		NIF3	IPR002678	GTP_cyclohydrolase_I/Nif3					PF01784	MM_CE	PD_CE	10	10	10	28.9	28.9	28.9	39.451		0	117.28	3417500000	18	0.00678266	3.1065	0.00430992	3.92594	C8V7M5
19.3804	19.4129	19.1479	18.8804	18.4542	18.3421	18.378	18.3488	19.2749	19.3003	19.4738	C8V7M6	ANIA_10453		+	0.824635	3.21548	+	0.968939	4.76342		cellular component organization;cellular membrane organization;cellular process;establishment of localization;membrane organization;mitochondrion organization;organelle organization;protein targeting;protein transport;transport		Tim54	IPR021056	Mt_import_IM_translocase_Tim54					PF11711	MM_CE	PD_CE	18	18	18	37.2	37.2	37.2	52.979		0	116.72	3142700000	21	0.000459838	6.54398	0	16.0233	C8V7M6
12.9808	13.0757	13.2744	13.2841	13.7058	13.5389	13.8432	13.7823	12.7695	12.9726	12.8388	C8V7M7	ANIA_03684		+	-0.563793	2.87914	+	-0.857266	3.60894	binding;cation binding;DNA binding;ion binding;metal ion binding;nucleic acid binding;nucleic acid binding transcription factor activity;sequence-specific DNA binding RNA polymerase II transcription factor activity;sequence-specific DNA binding transcription factor activity;transition metal ion binding;zinc ion binding			Fungal_trans;Zn_clus	IPR001138;IPR007219	Transcription_factor_dom_fun;Zn2-C6_fun-type_DNA-bd	PS00463;PS50048	ZN2_CY6_FUNGAL_1;ZN2_CY6_FUNGAL_2			PF00172;PF04082	MM_CE	PD_CE	1	1	1	1.9	1.9	1.9	70.376		0	5.0593	69718000	2	0.000718007	-5.64842	0.000225954	-9.26628	C8V7M7
14.5151	14.6917	14.6956	14.7047	14.3672	14.2976	14.3265	14.2974	14.7637	14.7579	14.7133	C8V7M9	ANIA_10436		+	0.329601	3.30164	+	0.4228	4.9999	protein binding transcription factor activity;RNA polymerase II transcription cofactor activity;RNA polymerase II transcription factor binding transcription factor activity;transcription cofactor activity;transcription factor binding transcription factor activity			Rox3	IPR013942	Mediator_Med19_fun					PF08633	MM_CE	PD_CE	2	2	2	5.5	5.5	5.5	48.118		0	8.5171	54973000	3	0.000460317	6.79011	0	17.896	C8V7M9
16.4193	16.5203	16.7392	16.6873	17.353	17.4447	17.3246	17.3953	17.1853	17.3	17.4754	C8V7N0	ANIA_10460		+	-0.787868	4.24651		-0.0591534	0.321112				DUF4202	IPR025255	DUF4202					PF13875	MM_CE		5	5	5	29.9	29.9	29.9	22.568		0	66.415	2730600000	8	0.000206897	-10.0378	0.498459	-0.767567	C8V7N0
16.2527	16.2286	16.3489	15.8461	15.6845	15.7003	15.5942	15.6429	15.9846	15.992	16.3637	C8V7N1	ANIA_03681		+	0.513564	2.40254	+	0.457954	2.08124				VIT1	IPR008217	Ccc1_fam					PF01988	MM_CE	PD_CE	2	2	2	6	6	6	31.842		0.0054063	2.0527	166810000	5	0.00173783	4.53411	0.00336198	4.22425	C8V7N1
16.3106	16.6666	16.0449	15.3005	14.1111	14.1607	14.2306	14.3179	17.2897	17.1732	17.542	C8V7N2	ANIA_03680		+	1.87558	3.16428	+	3.12987	6.08985												MM_CE	PD_CE	1	1	1	7.6	7.6	7.6	9.8424	+	1	-2	509980000	2	0.000440056	6.4011	0	29.6878	C8V7N2
17.834	17.9219	18.9812	17.896	18.0273	18.1816	17.9677	18.0696	19.141	18.6101	18.1544	C8V7N3	ANIA_03679			0.0967426	0.130612	+	0.573595	1.18163	catalytic activity;oxidoreductase activity			adh_short	IPR002198;IPR002347;IPR016040;IPR020904	DH_sc/Rdtase_SDR;Glc/ribitol_DH;NAD(P)-bd_dom;Sc_DH/Rdtase_CS	PS00061	ADH_SHORT					PD_CE	9	9	9	18.5	18.5	18.5	32.61		0	91.081	792800000	14	0.600796	0.34724	0.0282724	2.34679	C8V7N3
19.0475	19.0927	18.9296	18.9834	18.8919	18.8055	18.9948	18.8664	19.017	18.9217	18.8189	C8V7N4	ANIA_03678		+	0.1236	1.22597		0.0295359	0.16937				CUE;VPS9	IPR003123;IPR003892;IPR009060	CUE;UBA-like;VPS9	PS51140;PS51205	CUE;VPS9			PF02204;PF02845;PF18151	MM_CE		28	28	28	40.7	40.7	40.7	85.398		0	152.02	2532500000	36	0.0196696	2.32019	0.721698	0.441834	C8V7N4
15.8639	15.7495	15.7551	15.9496	16.5803	16.6056	16.6527	16.6917	15.1512	15.4864	15.1788	C8V7N9	ANIA_04645		+	-0.803015	5.23901	+	-1.36041	4.53448											PF16983	MM_CE	PD_CE	3	3	3	8	8	8	36.767		0	20.947	390730000	7	0	-14.8929	0.000110236	-14.3918	C8V7N9
11.6383	11.7026	12.2656	12.0546	12.451	12.4606	12.6816	12.3864	12.0551	11.8584	11.6465	C8V7P9	ANIA_04636		+	-0.579614	1.93612	+	-0.641557	2.44022												MM_CE	PD_CE	1	1	1	3	3	3	29.323		0.0033713	2.2946	55772000	2	0.00382193	-3.58418	0.00153379	-5.14537	C8V7P9
16.9463	16.8726	16.7071	16.4752	15.6096	15.5726	15.4314	15.5621	16.0144	16.0508	16.3458	C8V7Q0	ANIA_10572		+	1.20635	4.43403	+	0.593107	2.72864				LRR_8	IPR001611	Leu-rich_rpt	PS51450	LRR			PF13855	MM_CE	PD_CE	2	2	2	2.9	2.9	2.9	60.195		0.00556	2.0382	99147000	3	0	10.8241	0.000751293	5.9843	C8V7Q0
15.7527	15.7447	15.6903	15.3139	14.722	14.8217	14.5801	14.7435	15.303	15.3028	15.558	C8V7S6	ANIA_04612		+	0.908571	3.63595	+	0.671066	3.10311		biological regulation;cellular component organization;cellular process;cytoskeleton organization;organelle organization		DASH_Spc19	IPR013251	DASH_Spc19					PF08287	MM_CE	PD_CE	2	2	2	13.9	13.9	13.9	18.493		0	6.455	217520000	5	0.000363636	7.81736	0.000365866	7.2321	C8V7S6
16.3192	16.2847	15.256	15.9447	14.5476	14.3481	14.4206	14.7973	16.1409	16.3657	16.7	C8V7S7	ANIA_11444		+	1.42271	2.76068	+	1.87377	3.86078	cation transmembrane transporter activity;hydrogen ion transmembrane transporter activity;inorganic cation transmembrane transporter activity;ion transmembrane transporter activity;monovalent inorganic cation transmembrane transporter activity;substrate-specific transmembrane transporter activity;substrate-specific transporter activity;transmembrane transporter activity;transporter activity	biosynthetic process;cellular metabolic process;cellular nitrogen compound metabolic process;cellular process;establishment of localization;heterocycle metabolic process;hydrogen transport;ion transport;metabolic process;nitrogen compound metabolic process;nucleobase-containing compound metabolic process;nucleobase-containing small molecule metabolic process;nucleotide metabolic process;primary m…		ATP-synt_J	IPR006995	ATPase_F0-cplx_jsu					PF04911	MM_CE	PD_CE	2	2	2	25.9	25.9	25.9	6.2111		0.0073992	1.8698	50018000	3	0.000820672	5.35577	0.00015739	10.459	C8V7S7
14.1805	14.184	14.4025	14.5814	15.2982	15.2919	15.3984	15.2862	14.5876	14.7177	14.5935	C8V7U1	ANIA_04598		+	-0.981554	4.18666	+	-0.685741	4.54189					IPR021713	Folliculin					PF11704	MM_CE	PD_CE	5	5	5	10.3	10.3	10.3	49.409		0	15.876	157370000	5	0.00019115	-9.7979	0.000110891	-14.442	C8V7U1
16.276	16.4889	16.4008	15.6059	15.3906	15.2189	15.2723	15.327	16.5392	16.4694	16.9234	C8V7U7	ANIA_04592		+	0.890657	2.32587	+	1.34177	3.90033	binding;catalytic activity;cation binding;heme binding;ion binding;iron ion binding;metal ion binding;oxidoreductase activity;oxidoreductase activity, acting on paired donors, with incorporation or reduction of molecular oxygen;oxidoreductase activity, acting on paired donors, with oxidation of a pair of donors resulting in the reduction of molecular oxygen to two molecules of water;tetrapyrrole …	lipid metabolic process;metabolic process;primary metabolic process		Cyt-b5;FA_desaturase	IPR001199;IPR005804;IPR012171	Cyt_B5-like_heme/steroid-bd;Fatty_acid_desaturase;Fatty_acid_desaturase-1	PS50255	CYTOCHROME_B5_2			PF00173;PF00487	MM_CE	PD_CE	3	3	3	4.6	4.6	4.6	63.208		0	5.9981	334040000	4	0.00189599	4.36941	0.000163673	10.6587	C8V7U7
19.9802	19.8976	19.8811	19.833	19.9228	19.8213	19.8823	19.7856	19.9329	20.0675	19.9742	C8V7U8	ANIA_04591			0.0449781	0.469195	+	0.13849	1.42666	catalytic activity;intramolecular transferase activity;intramolecular transferase activity, phosphotransferases;isomerase activity;phosphopentomutase activity	biosynthetic process;carbohydrate metabolic process;catabolic process;cellular metabolic compound salvage;cellular metabolic process;cellular nitrogen compound metabolic process;cellular process;heterocycle metabolic process;metabolic process;nitrogen compound metabolic process;nucleobase-containing compound catabolic process;nucleobase-containing compound metabolic process;nucleobase-containing …		PGM_PMM_I;PGM_PMM_II;PGM_PMM_III;PGM_PMM_IV	IPR005843;IPR005844;IPR005845;IPR005846;IPR016055	A-D-PHexomutase_a/b/a-I;A-D-PHexomutase_a/b/a-I/II/III;A-D-PHexomutase_a/b/a-II;A-D-PHexomutase_a/b/a-III;A-D-PHexomutase_C					PF00408;PF02878;PF02879;PF02880		PD_CE	17	17	17	29.5	29.5	29.5	68.952		0	238.41	16983000000	48	0.172197	1.03755	0.0147084	2.81245	C8V7U8
19.2754	19.4284	19.4493	19.3757	19.1929	19.1176	19.2462	19.3154	19.2292	19.2504	19.4885	C8V7V5	ANIA_04585		+	0.164183	1.5507		0.104686	0.561288		biological regulation		NOT2_3_5;Not3	IPR007207;IPR007282	NOT;Not_N					PF04065;PF04153	MM_CE		20	20	20	35.9	35.9	35.9	68.649		0	190.94	3415000000	29	0.0088141	2.8778	0.225144	1.22652	C8V7V5
18.6537	18.5222	18.0797	17.6982	15.8745	15.7845	15.6253	15.6607	17.9408	18.0086	18.3703	C8V7X1	ANIA_04569		+	2.50222	4.49771	+	2.37034	5.03096	2-octoprenyl-3-methyl-6-methoxy-1,4-benzoquinone hydroxylase activity;catalytic activity;oxidoreductase activity	biosynthetic process;cellular ketone metabolic process;cellular metabolic process;cellular process;cofactor metabolic process;metabolic process;small molecule metabolic process		COQ7	IPR009078;IPR011566;IPR012347	Ferritin-like_SF;Ferritin-rel;Ubq_synth_Coq7					PF03232	MM_CE	PD_CE	7	7	7	28.3	28.3	28.3	27.364		0	22.589	1480800000	11	0	11.1037	0	18.1573	C8V7X1
16.0179	16.1815	15.9649	16.0543	16.0704	16.0171	16.0314	15.8717	15.7833	15.9643	15.8928	C8V7X2	ANIA_10570			0.056983	0.394672		-0.117539	0.844505	catalytic activity;hydrolase activity;hydrolase activity, acting on ester bonds;non-membrane spanning protein tyrosine phosphatase activity;phosphatase activity;phosphoprotein phosphatase activity;phosphoric ester hydrolase activity;protein serine/threonine phosphatase activity;protein tyrosine phosphatase activity			LMWPc	IPR000106;IPR017867;IPR023485	Ptyr_pPase_SF;Tyr_phospatase/Ars_reductase;Tyr_phospatase_low_mol_wt					PF01451			3	3	3	13.5	13.5	13.5	27.831		0	24.745	441290000	6	0.221748	0.89954	0.0781601	-1.73615	C8V7X2
20.0357	20.0391	20.0044	20.1	20.0466	20.149	20.0451	20.1035	19.7771	19.8796	19.8601	C8V7X8	ANIA_04563			-0.0412898	0.611668	+	-0.247113	2.81196	adenyl nucleotide binding;adenyl ribonucleotide binding;ATP binding;binding;catalytic activity;kinase activity;nucleotide binding;phosphotransferase activity, alcohol group as acceptor;protein kinase activity;protein serine/threonine kinase activity;purine nucleotide binding;purine ribonucleoside triphosphate binding;purine ribonucleotide binding;ribonucleotide binding;transferase activity;transf…	biological regulation;cellular component organization;cellular membrane organization;cellular metabolic process;cellular nitrogen compound metabolic process;cellular process;cytoskeleton organization;DNA metabolic process;DNA repair;endocytosis;establishment of localization;Golgi vesicle transport;macromolecule metabolic process;macromolecule modification;membrane invagination;membrane organizati…		Pkinase	IPR000719;IPR008271;IPR011009;IPR017441	Kinase-like_dom;Prot_kinase_dom;Protein_kinase_ATP_BS;Ser/Thr_kinase_AS	PS00107;PS00108;PS50011	PROTEIN_KINASE_ATP;PROTEIN_KINASE_DOM;PROTEIN_KINASE_ST			PF00069		PD_CE	19	19	18	46.2	46.2	44.3	42.579		0	102.11	9200900000	48	0.109605	-1.29002	0.000661074	-6.24539	C8V7X8
15.3368	15.1622	15.2253	15.3731	15.0564	15.335	15.0899	15.1112	17.0684	16.3015	15.8605	C8V7Z2	ANIA_10626			0.126203	0.781076	+	1.26197	2.04713	active transmembrane transporter activity;adenyl nucleotide binding;adenyl ribonucleotide binding;ATP binding;ATPase activity;ATPase activity, coupled;ATPase activity, coupled to movement of substances;ATPase activity, coupled to transmembrane movement of ions;ATPase activity, coupled to transmembrane movement of substances;binding;catalytic activity;cation transmembrane transporter activity;cati…	biosynthetic process;cellular metabolic process;cellular nitrogen compound metabolic process;cellular process;establishment of localization;heterocycle metabolic process;hydrogen transport;ion transport;metabolic process;nitrogen compound metabolic process;nucleobase-containing compound metabolic process;nucleobase-containing small molecule metabolic process;nucleotide metabolic process;primary m…		ATP-synt_ab;ATP-synt_ab_C;ATP-synt_ab_N	IPR000194;IPR000793;IPR004100;IPR005294;IPR020003;IPR023366;IPR027417	ATPase_a/bsu_AS;ATPase_asu-like;ATPase_F1/V1/A1_a/bsu_nucl-bd;ATPase_F1/V1/A1-cplx_a/bsu_C;ATPase_F1_a/bsu_N;ATPase_F1-cplx_asu;P-loop_NTPase	PS00152	ATPASE_ALPHA_BETA	ATP synthase subunit alpha		PF00006;PF00306;PF02874		PD_CE	17	3	3	22.8	4.8	4.8	61.474		0	5.6204	245860000	4	0.066152	1.57841	0.00365529	4.14292	C8V7Z2
11.7708	12.2766	11.9063	12.2867	12.1371	12.3609	12.0943	11.9364	12.9881	12.287	12.0945	C8V7Z3	ANIA_10631			-0.0720947	0.178324		0.324358	0.60089				SBDS	IPR002140;IPR019783	Ribosome_mat_SBDS_N;Ribosome_maturation_pr_SBDS					PF01172			1	1	1	13.3	13.3	13.3	12.563		0	3.9266	29608000	1	0.49378	-0.457739	0.191921	1.29882	C8V7Z3
13.2617	13.3348	12.972	13.3985	11.5535	12.4294	11.3197	11.9251	13.8159	12.6388	13.8086	C8V7Z5	ANIA_05082		+	1.43482	2.82967	+	1.61418	1.85925	binding;catalytic activity;GTP binding;GTPase activity;guanyl nucleotide binding;guanyl ribonucleotide binding;hydrolase activity;hydrolase activity, acting on acid anhydrides;hydrolase activity, acting on acid anhydrides, in phosphorus-containing anhydrides;nucleoside-triphosphatase activity;nucleotide binding;purine nucleotide binding;purine ribonucleoside triphosphate binding;purine ribonucleo…	cellular component assembly;cellular component organization;cellular macromolecular complex assembly;cellular process;macromolecular complex assembly;protein complex assembly;protein polymerization		Tubulin_C	IPR000217;IPR002452;IPR003008;IPR008280;IPR018316;IPR023123	Alpha_tubulin;Tub_FtsZ_C;Tubulin;Tubulin/FtsZ_2-layer-sand-dom;Tubulin_C;Tubulin_FtsZ_GTPase					PF03953	MM_CE	PD_CE	2	1	1	4.8	2.8	2.8	40.545	+	1	-2	11875000	1	0.000710341	5.52485	0.00549933	3.7119	C8V7Z5
14.4661	14.2369	13.4808	13.823	13.5268	13.533	13.4127	13.2549	13.5551	13.919	14.1768	C8V827	ANIA_05055		+	0.56986	1.33031	+	0.451779	1.35131	aminopeptidase activity;binding;catalytic activity;cation binding;exopeptidase activity;hydrolase activity;ion binding;metal ion binding;metalloaminopeptidase activity;metalloexopeptidase activity;metallopeptidase activity;peptidase activity;peptidase activity, acting on L-amino acid peptides	cellular metabolic process;cellular process;macromolecule metabolic process;macromolecule modification;metabolic process;primary metabolic process;protein metabolic process;protein modification process		Peptidase_M24	IPR000994;IPR001714;IPR002467	Pept_M24_MAP;Pept_M24_structural-domain;Pept_M24A_MAP1			Methionine aminopeptidase 1		PF00557	MM_CE	PD_CE	2	2	2	10.3	10.3	10.3	39.879		0	5.6764	52856000	2	0.0151662	2.49663	0.0177424	2.66652	C8V827
NaN	NaN	NaN	NaN	NaN	NaN	NaN	NaN	NaN	NaN	NaN	C8V829	ANIA_05053			0	NaN		0	NaN	acetyltransferase activity;catalytic activity;N-acetyltransferase activity;N-acyltransferase activity;transferase activity;transferase activity, transferring acyl groups;transferase activity, transferring acyl groups other than amino-acyl groups			Acetyltransf_10	IPR000182;IPR016181	Acyl_CoA_acyltransferase;GNAT_dom	PS51186	GNAT			PF00583			1	1	1	4.7	4.7	4.7	32.043	+	1	-2	0	0	1	NaN	1	NaN	C8V829
15.769	15.7165	15.4951	15.7326	16.0185	16.0785	16.212	16.0168	16.0581	16.1573	15.9539	C8V830	ANIA_05052		+	-0.403144	2.70709		-0.0249821	0.126897	binding;cation binding;DNA binding;ion binding;metal ion binding;nucleic acid binding;nucleic acid binding transcription factor activity;sequence-specific DNA binding RNA polymerase II transcription factor activity;sequence-specific DNA binding transcription factor activity;transition metal ion binding;zinc ion binding			Fungal_trans;Zn_clus	IPR001138;IPR007219	Transcription_factor_dom_fun;Zn2-C6_fun-type_DNA-bd	PS00463;PS50048	ZN2_CY6_FUNGAL_1;ZN2_CY6_FUNGAL_2			PF00172;PF04082	MM_CE		3	3	3	5.3	5.3	5.3	80.13		0	4.3449	79753000	3	0.000981583	-5.22695	0.793039	-0.341479	C8V830
18.4042	18.2652	19.6195	18.6045	19.5755	19.5646	19.8486	20.1207	18.8684	19.2926	18.8969	C8V858	ANIA_05027		+	-1.054	1.70665	+	-0.758062	1.94925				DUF2235	IPR018712	DUF2235					PF09994	MM_CE	PD_CE	26	26	26	40	40	40	72.119		0	257.17	5333700000	40	0.00636262	-3.15661	0.0043606	-3.91489	C8V858
18.8846	18.8341	18.8868	18.7317	18.0991	17.9918	17.9266	17.7536	19.2339	19.3388	19.2565	C8V864	ANIA_05021		+	0.89151	4.4765	+	1.33363	4.60386		biosynthetic process;metabolic process		Glycos_transf_1	IPR001296	Glyco_trans_1					PF00534	MM_CE	PD_CE	20	20	20	28.2	28.2	28.2	79.423		0	108.33	7111100000	30	0	11.0099	0.000123077	14.8686	C8V864
20.8064	20.8151	20.7749	20.8151	20.8522	20.8522	20.822	20.7633	20.6092	20.6242	20.4212	C8V880	ANIA_04547			-0.0195312	0.367798	+	-0.270877	2.20005	structural molecule activity	cellular process;establishment of localization;Golgi vesicle transport;protein transport;transport;vesicle-mediated transport		Adaptin_N;COP-gamma_platf	IPR002553;IPR009028;IPR011989;IPR013040;IPR013041;IPR015873;IPR016024;IPR017106	ARM-like;ARM-type_fold;Clathrin/coatomer_adapt-like_N;Clathrin_a/coatomer_app_sub_C;Coatomer/calthrin_app_sub_C;Coatomer/clathrin_app_Ig-like;Coatomer_gsu;Coatomer_gsu_app_Ig-like-sub			Coatomer subunit gamma		PF01602;PF08752;PF16381		PD_CE	30	30	30	33.6	33.6	33.6	100.67		0	253.65	20231000000	66	0.242194	-0.848419	0.00256104	-4.51552	C8V880
17.6875	17.7049	17.5345	17.5129	17.4113	17.4378	17.2662	17.3034	17.5744	17.642	17.6712	C8V884	ANIA_04543	x	+	0.255244	2.11105	+	0.274553	2.39927	catalytic activity;lysine N-methyltransferase activity;methyltransferase activity;N-methyltransferase activity;protein methyltransferase activity;protein-lysine N-methyltransferase activity;S-adenosylmethionine-dependent methyltransferase activity;transferase activity;transferase activity, transferring one-carbon groups	cellular metabolic process;cellular process;establishment of localization;macromolecule metabolic process;macromolecule modification;metabolic process;one-carbon metabolic process;peptidyl-amino acid modification;primary metabolic process;protein alkylation;protein metabolic process;protein modification process;small molecule metabolic process;transport;vesicle-mediated transport			IPR026635;IPR029063	SAM-dependent_MTases;See1-like					PF13847	MM_CE	PD_CE	5	5	5	15.9	15.9	15.9	36.216		0	14.074	776400000	8	0.00263169	3.9265	0.00164674	5.03385	C8V884
17.6054	17.6898	17.6802	17.5997	17.7142	17.5856	17.6895	17.7972	18.267	18.2115	18.3993	C8V887	ANIA_04540			-0.0528569	0.483349	+	0.596001	3.44868	binding;catalytic activity;cation binding;ion binding;metal ion binding;oxidoreductase activity;transition metal ion binding;zinc ion binding			ADH_N;ADH_zinc_N	IPR002085;IPR002328;IPR011032;IPR013149;IPR013154;IPR016040	ADH_C;ADH_GroES-like;ADH_SF_Zn-type;ADH_Zn_CS;GroES-like;NAD(P)-bd_dom	PS00059	ADH_ZINC			PF00107;PF08240		PD_CE	7	6	6	18.9	16.9	16.9	38.216		0	17.834	920700000	9	0.164422	-1.06322	0.000225464	8.57302	C8V887
17.5907	17.5506	17.5364	17.9654	18.1362	18.4219	18.2725	18.3416	17.3638	17.5405	17.2377	C8V888	ANIA_04539		+	-0.632246	2.7469	+	-0.912375	3.52366				Yippee-Mis18	IPR004910	Yippee/Mis18			Protein yippee-like		PF03226	MM_CE	PD_CE	2	2	2	17.3	17.3	17.3	12.674		0	6.6242	1352100000	9	0.000879098	-5.32243	0.000240283	-8.89135	C8V888
18.911	18.9101	19.0832	19.1084	18.8712	18.8274	18.8345	18.7572	18.6472	18.6789	18.6466	C8V891	ANIA_04536		+	0.180609	1.6608	+	-0.165028	2.59535	adenyl nucleotide binding;adenyl ribonucleotide binding;ATP binding;binding;catalytic activity;kinase activity;molecular transducer activity;nucleotide binding;phosphotransferase activity, alcohol group as acceptor;protein kinase activity;purine nucleotide binding;purine ribonucleoside triphosphate binding;purine ribonucleotide binding;ribonucleotide binding;signal transducer activity;transferase…			Pkinase	IPR000014;IPR000719;IPR008271;IPR011009	Kinase-like_dom;PAS;Prot_kinase_dom;Ser/Thr_kinase_AS	PS00108;PS50011	PROTEIN_KINASE_DOM;PROTEIN_KINASE_ST			PF00069	MM_CE	PD_CE	15	15	14	14.3	14.3	13.6	123.63		0	79.603	992150000	23	0.00700316	3.07374	0.000985486	-5.58454	C8V891
18.7649	18.6947	18.8574	18.8696	19.2066	19.2066	19.2915	19.2496	18.5479	18.5598	18.4433	C8V894	ANIA_10564		+	-0.441936	4.1384	+	-0.721576	5.05835					IPR001680;IPR015943;IPR017986	WD40/YVTN_repeat-like_dom;WD40_repeat;WD40_repeat_dom					PF17034	MM_CE	PD_CE	18	18	18	21.7	21.7	21.7	108.38		0	72.19	1450800000	25	0.000180301	-9.60824	0	-18.3907	C8V894
17.0411	17.1143	16.7861	17.1128	17.0946	17.27	17.1803	17.0895	17.1933	17.2431	16.9922	C8V895	ANIA_10567			-0.145003	0.81543		-0.0156984	0.0680257	2'-phosphotransferase activity;catalytic activity;phosphotransferase activity, alcohol group as acceptor;transferase activity;transferase activity, transferring phosphorus-containing groups;tRNA 2'-phosphotransferase activity	cellular metabolic process;cellular nitrogen compound metabolic process;cellular process;macromolecule metabolic process;metabolic process;nitrogen compound metabolic process;nucleobase-containing compound metabolic process;primary metabolic process;RNA metabolic process;RNA processing;RNA splicing;tRNA metabolic process;tRNA processing		PTS_2-RNA	IPR002745	Ptrans_KptA/Tpt1					PF01885			6	6	6	18.9	18.9	18.9	37.157		0	23.574	690230000	9	0.0602052	-1.63599	0.889716	-0.192377	C8V895
16.6415	16.837	16.6898	16.7507	17.9227	18.1402	18.1214	17.8585	17.2197	17.0759	17.1712	C8V897	ANIA_04531		+	-1.28094	5.3514	+	-0.85512	3.64266				Abhydrolase_6	IPR000073;IPR029058	AB_hydrolase;AB_hydrolase_1					PF00561	MM_CE	PD_CE	3	3	3	6.9	6.9	6.9	55.933		0	15.009	770650000	6	0	-15.5645	0.000211523	-9.41841	C8V897
17.1258	17.08	17.3653	17.9404	19.667	19.9727	19.3041	19.7045	16.9504	17.5727	17.0688	C8V8A2	ANIA_04527		+	-2.28417	4.10767	+	-2.46477	3.93143	binding;chromatin binding;DNA binding;nucleic acid binding			Myb_DNA-binding	IPR001005;IPR009057;IPR017877;IPR017930	Homeodomain-like;Myb_dom;Myb-like_dom;SANT/Myb	PS50090;PS51294	HTH_MYB;MYB_LIKE			PF00249	MM_CE	PD_CE	9	9	9	60.1	60.1	60.1	21.06		0	259.18	2150300000	10	0.000173077	-9.4892	0.000168378	-10.8182	C8V8A2
19.6821	19.5698	19.8907	19.7857	20.1999	20.3297	20.3778	20.5314	19.4964	19.548	19.3552	C8V8B5	ANIA_10563		+	-0.627609	3.18693	+	-0.893181	3.65506	alkaline phosphatase activity;carbohydrate phosphatase activity;catalytic activity;fructose-2,6-bisphosphate 6-phosphatase activity;hydrolase activity;hydrolase activity, acting on ester bonds;phosphatase activity;phosphoric ester hydrolase activity;sugar-phosphatase activity	cellular metabolic process;cellular nitrogen compound metabolic process;cellular process;cofactor metabolic process;heterocycle metabolic process;macromolecule metabolic process;macromolecule modification;metabolic process;nitrogen compound metabolic process;nucleobase-containing compound metabolic process;nucleobase-containing small molecule metabolic process;nucleotide metabolic process;phospho…		Alk_phosphatase	IPR001952;IPR017849;IPR017850;IPR018299	Alkaline_Pase-like_a/b/a;Alkaline_phosphatase;Alkaline_phosphatase_AS;Alkaline_phosphatase_core	PS00123	ALKALINE_PHOSPHATASE	Alkaline phosphatase		PF00245	MM_CE	PD_CE	27	27	27	35.1	35.1	35.1	66.252		0	309.62	21758000000	42	0.000447633	-6.46399	0.000214058	-9.47494	C8V8B5
18.8052	18.7209	18.6872	18.9199	18.723	18.8523	18.7449	18.642	18.9321	18.7188	18.6745	C8V8B9	ANIA_10562			0.0427346	0.259376		0.0345801	0.156411	catalytic activity;oxidoreductase activity;oxidoreductase activity, acting on a sulfur group of donors;oxidoreductase activity, acting on a sulfur group of donors, disulfide as acceptor;peptide-methionine-(S)-S-oxide reductase activity	cellular metabolic process;cellular process;macromolecule metabolic process;metabolic process;primary metabolic process;protein metabolic process;response to chemical stimulus;response to oxidative stress;response to stimulus;response to stress		PMSR	IPR002569;IPR028427	Met_Sox_Rdtase;Met_Sox_Rdtase_MsrA					PF01625			6	6	6	26.8	26.8	26.8	23.731		0	39.068	4039100000	20	0.359388	0.632592	0.742407	0.411762	C8V8B9
18.1625	18.0947	18.4824	18.1745	18.5951	18.437	18.6768	18.4229	18.3231	18.1621	18.0337	C8V8C3	ANIA_04510		+	-0.304407	1.54309	+	-0.359994	1.78755	catalytic activity;endo-1,4-beta-xylanase activity;hydrolase activity;hydrolase activity, acting on glycosyl bonds;hydrolase activity, hydrolyzing O-glycosyl compounds	metabolic process		cNMP_binding	IPR000595;IPR001810;IPR006553;IPR014710;IPR018488;IPR018490	cNMP-bd_CS;cNMP-bd_dom;cNMP-bd-like;F-box_dom;Leu-rich_rpt_Cys-con_subtyp;RmlC-like_jellyroll	PS00889;PS50042;PS50181	CNMP_BINDING_2;CNMP_BINDING_3;FBOX			PF00027	MM_CE	PD_CE	14	14	14	18.4	18.4	18.4	102.2		0	165.83	874680000	22	0.00898462	-2.86441	0.00650956	-3.55447	C8V8C3
16.9686	16.8582	17.0021	17.34	17.9803	18.3436	18.175	18.1787	17.3214	17.2033	17.1645	C8V8C9	ANIA_04504		+	-1.12717	3.92932	+	-0.939679	3.71461	catalytic activity			Glyco_hydro_76	IPR005198;IPR008928;IPR012341	6-hairpin_glycosidase-like;6hp_glycosidase;Glyco_hydro_76					PF03663	MM_CE	PD_CE	9	9	9	18.2	18.2	18.2	68.813		0	110.12	1743400000	16	0.000144966	-8.82373	0.000139456	-9.75068	C8V8C9
16.2986	16.4138	16.5211	16.4808	16.3795	16.4408	16.1404	16.2901	16.1228	16.0771	16.542	C8V8D1	ANIA_04502			0.115876	0.689654		-0.0654106	0.172253				DUF2205	IPR019357	DUF2205_coiled-coil					PF10224			5	5	5	24.7	24.7	24.7	18.604		0	11.741	3132400000	6	0.0868349	1.42391	0.717122	-0.448464	C8V8D1
18.7244	18.5503	18.4258	18.1078	17.5615	17.0349	16.8628	17.0127	18.5377	18.1218	18.8819	C8V8D3	ANIA_04500		+	1.33409	3.25308	+	1.39584	2.53642	enzyme inhibitor activity;enzyme regulator activity	biological regulation		IATP	IPR007648	ATPase_inhibitor_IATP_mt					PF04568	MM_CE	PD_CE	16	16	16	71.4	71.4	71.4	11.306		0	188.94	1948800000	11	0.000440061	6.6505	0.00116372	5.41453	C8V8D3
20.0209	20.0917	20.0954	19.9476	19.9762	19.9426	20.0055	20.0055	20.3128	20.3398	20.5373	C8V8E0	ANIA_04494			0.0564561	0.725691	+	0.414189	2.95055	structural constituent of ribosome;structural molecule activity	biosynthetic process;cellular metabolic process;cellular process;macromolecule metabolic process;metabolic process;primary metabolic process;protein metabolic process;translation		Ribosomal_L14	IPR000218;IPR019972;IPR023571	Ribosomal_L14_CS;Ribosomal_L14_dom;Ribosomal_L14b/L23e	PS00049	RIBOSOMAL_L14			PF00238		PD_CE	8	8	8	47.9	47.9	47.9	14.839		0	37.978	40730000000	56	0.0775231	1.48507	0.000571956	6.70013	C8V8E0
19.0706	19.0292	18.9861	18.9603	18.8368	18.8347	18.8284	18.7693	18.9346	18.9076	18.7872	C8V8E2	ANIA_04492		+	0.194244	3.25897		0.0591768	0.653926	catalytic activity;cysteine-type peptidase activity;hydrolase activity;peptidase activity;peptidase activity, acting on L-amino acid peptides;small conjugating protein-specific protease activity;ubiquitin-specific protease activity	catabolic process;cellular component organization;cellular metabolic process;cellular process;macromolecule metabolic process;macromolecule modification;metabolic process;mitochondrion organization;organelle fission;organelle organization;primary metabolic process;protein metabolic process;protein modification by small protein conjugation or removal;protein modification process;proteolysis;proteo…		JAB;MitMem_reg	IPR000555;IPR024969	JAMM/MPN+_dom;Rpn11/EIF3F_C					PF01398;PF13012	MM_CE		13	13	13	36.1	36.1	36.1	37.794		0	52.707	9732800000	31	0.000445127	6.66732	0.155403	1.39485	C8V8E2
20.1841	20.154	20.2383	20.3798	20.3558	20.3321	20.3253	20.1964	19.9558	19.9009	19.7581	C8V8F1	ANIA_04483			-0.0633645	0.464166	+	-0.430799	2.92561	adenyl nucleotide binding;adenyl ribonucleotide binding;ATP binding;binding;catalytic activity;kinase activity;nucleotide binding;phosphotransferase activity, alcohol group as acceptor;protein kinase activity;purine nucleotide binding;purine ribonucleoside triphosphate binding;purine ribonucleotide binding;ribonucleotide binding;transferase activity;transferase activity, transferring phosphorus-c…			Pkinase	IPR000719;IPR002290;IPR008271;IPR011009;IPR020636	Ca/CaM-dep_Ca-dep_prot_Kinase;Kinase-like_dom;Prot_kinase_dom;Ser/Thr_dual-sp_kinase;Ser/Thr_kinase_AS	PS00108;PS50011	PROTEIN_KINASE_DOM;PROTEIN_KINASE_ST			PF00069		PD_CE	31	31	31	53.3	53.3	53.3	70.052		0	323.31	13106000000	59	0.175131	-1.02839	0.000615804	-6.61635	C8V8F1
21.0825	21.0719	20.9627	21.2129	21.2127	21.2437	21.2008	21.1587	20.9218	20.9354	20.7798	C8V8F5	nikA		+	-0.121487	1.18055	+	-0.324996	3.03289	catalytic activity;kinase activity;molecular transducer activity;phosphotransferase activity, alcohol group as acceptor;phosphotransferase activity, nitrogenous group as acceptor;protein histidine kinase activity;protein kinase activity;signal transducer activity;transferase activity;transferase activity, transferring phosphorus-containing groups;two-component sensor activity	biological regulation;cellular metabolic process;cellular process;macromolecule metabolic process;macromolecule modification;metabolic process;peptidyl-amino acid modification;phosphorus metabolic process;primary metabolic process;protein metabolic process;protein modification process;protein phosphorylation;response to abiotic stimulus;response to osmotic stress;response to stimulus;response to …		HAMP;HATPase_c;HisKA;Response_reg	IPR001789;IPR003594;IPR003660;IPR003661;IPR004358;IPR005467;IPR009082;IPR011006	CheY-like_superfamily;EnvZ-like_dim/P;HAMP_linker_domain;HATPase_C;Sig_transdc_His_kinase_core;Sig_transdc_His_kinase_dimeric;Sig_transdc_His_kin-like_C;Sig_transdc_resp-reg_receiver	PS50109;PS50110;PS50885	HAMP;HIS_KIN;RESPONSE_REGULATORY			PF00072;PF00512;PF00672;PF02518	MM_CE	PD_CE	47	47	47	39.6	39.6	39.6	142.83		0	323.31	20090000000	89	0.0219275	-2.24396	0.000432485	-6.98299	C8V8F5
16.8996	16.7296	16.882	16.3464	16.7009	16.6869	16.5888	16.8585	16.8697	16.4738	17.137	C8V8F8	ANIA_10568			0.00561333	0.0135287		0.118022	0.277263	carboxylic acid transmembrane transporter activity;monocarboxylic acid transmembrane transporter activity;organic acid transmembrane transporter activity;pyruvate transmembrane transporter activity;substrate-specific transmembrane transporter activity;substrate-specific transporter activity;transmembrane transporter activity;transporter activity	establishment of localization;ion transport;organic acid transport;transport		MPC	IPR005336	MPC					PF03650			2	2	2	5.7	5.7	5.7	33.857		0.00082088	2.8195	970500000	4	0.951191	0.0400808	0.555118	0.677566	C8V8F8
18.6612	18.7703	19.0269	18.6489	18.4587	18.3885	18.4281	18.5576	18.6525	18.7652	19.1973	C8V8F9	ANIA_10561		+	0.318591	1.81674	+	0.413422	1.44302		cellular metabolic process;cellular nitrogen compound metabolic process;cellular process;macromolecule metabolic process;metabolic process;mRNA metabolic process;mRNA processing;nitrogen compound metabolic process;nucleobase-containing compound metabolic process;primary metabolic process;RNA metabolic process;RNA processing;RNA splicing		LSM	IPR001163;IPR006649;IPR010920	LSM_dom;Ribonucl_LSM;Ribonucl_LSM_euk/arc					PF01423	MM_CE	PD_CE	8	8	8	38.8	38.8	38.8	19.233		0	118.25	3973600000	22	0.00499722	3.35894	0.0141443	2.84449	C8V8F9
20.17	20.2832	20.0782	19.965	19.9153	19.9217	19.8449	19.846	20.1786	20.3777	20.4294	C8V8G5	ANIA_04470		+	0.242103	1.84833	+	0.446571	2.89101	binding;catalytic activity;GTP binding;GTPase activity;guanyl nucleotide binding;guanyl ribonucleotide binding;hydrolase activity;hydrolase activity, acting on acid anhydrides;hydrolase activity, acting on acid anhydrides, in phosphorus-containing anhydrides;nucleic acid binding;nucleoside-triphosphatase activity;nucleotide binding;purine nucleotide binding;purine ribonucleoside triphosphate bind…	biological regulation;cellular component assembly;cellular component organization;cellular macromolecular complex assembly;cellular process;macromolecular complex assembly;regulation of translation;ribonucleoprotein complex assembly		eIF2_C;GTP_EFTU;GTP_EFTU_D2	IPR000795;IPR004161;IPR009000;IPR009001;IPR015256;IPR027417	EF_GTP-bd_dom;P-loop_NTPase;TIF2_gsu_C;Transl_B-barrel;Transl_elong_EF1A/Init_IF2_C;Transl_elong_EFTu/EF1A_2					PF00009;PF03144;PF09173	MM_CE	PD_CE	16	16	16	33.9	33.9	33.9	55.998		0	178.56	18180000000	40	0.00470927	3.41794	0.000632327	6.50154	C8V8G5
19.1281	19.3138	19.46	19.1648	19.6217	19.4687	19.4832	19.8944	18.6362	19.0009	19.0488	C8V8G6	ANIA_11231		+	-0.350348	1.51439	+	-0.721702	2.20099	catalytic activity;endopeptidase activity;hydrolase activity;metalloendopeptidase activity;metallopeptidase activity;peptidase activity;peptidase activity, acting on L-amino acid peptides	macromolecule metabolic process;metabolic process;primary metabolic process;protein maturation;protein metabolic process		Peptidase_M48	IPR001915;IPR027057	CAXX_Prtase_1;Peptidase_M48					PF01435;PF16491	MM_CE	PD_CE	8	8	8	17.5	17.5	17.5	51.952		0	43.572	7021700000	19	0.00961324	-2.81406	0.00256262	-4.51786	C8V8G6
16.5374	16.6409	16.262	16.1521	16.21	15.9303	16.2494	16.3315	17.1655	16.9124	17.328	C8V8G7	ANIA_09433			0.217771	0.742578	+	0.95501	2.92482													PD_CE	6	6	6	50.5	50.5	50.5	19.698		0	41.428	325490000	7	0.073956	1.51361	0.000614966	6.61369	C8V8G7
15.5079	15.4236	16.1658	15.1163	14.757	14.5445	14.6919	14.5777	15.5963	15.6585	15.8083	C8V8G8	ANIA_11230		+	0.910602	2.15961	+	1.04489	4.36288	structural constituent of ribosome;structural molecule activity	biosynthetic process;cellular metabolic process;cellular process;macromolecule metabolic process;metabolic process;primary metabolic process;protein metabolic process;translation		Ribosomal_L34	IPR000271	Ribosomal_L34			Ribosomal protein L34		PF00468	MM_CE	PD_CE	2	2	2	5.8	5.8	5.8	15.388		0.0013068	2.6972	86778000	4	0.00244711	4.02436	8.88889e-05	13.2748	C8V8G8
20.2558	20.2852	20.2874	20.2073	20.2033	20.2711	20.1507	20.2914	20.174	20.283	20.1335	C8V8G9	ANIA_09434			0.0297861	0.34273		-0.0322797	0.242861	binding;catalytic activity;cation binding;ion binding;metal ion binding			Peptidase_M16;Peptidase_M16_C	IPR007863;IPR011237;IPR011249;IPR011765	Metalloenz_LuxS/M16;Pept_M16_dom;Pept_M16_N;Peptidase_M16_C					PF00675;PF05193			29	29	29	23.7	23.7	23.7	118.85		0	94.391	8379300000	51	0.264544	0.799975	0.604473	-0.604875	C8V8G9
18.2934	18.239	18.3708	18.245	18.0951	18.1324	18.0869	18.2211	17.8557	17.8961	18.1033	C8V8H0	ANIA_09435		+	0.153158	1.91311	+	-0.18215	1.24762		cellular component organization;cellular process;mitosis;nuclear division;organelle fission;organelle organization		Zw10	IPR009361	RZZ-complex_Zw10					PF06248	MM_CE	PD_CE	12	12	12	13.9	13.9	13.9	85.695		0	106.51	1773300000	19	0.00396767	3.54028	0.0237513	-2.46981	C8V8H0
17.8834	17.976	17.7648	17.4535	17.2765	17.3464	17.1261	17.2546	18.0331	18.1544	18.4956	C8V8H2	ANIA_04468		+	0.518538	2.2567	+	0.976797	3.21167	binding;nucleic acid binding;RNA binding;structural constituent of ribosome;structural molecule activity	biological regulation;biosynthetic process;cellular metabolic process;cellular process;macromolecule metabolic process;metabolic process;primary metabolic process;protein metabolic process;translation		Ribosomal_S13	IPR001892;IPR010979;IPR018269;IPR027437	30s_Rbsml_prot_S13_C;Ribosomal_S13;Ribosomal_S13_CS;Ribosomal_S13-like_H2TH	PS00646;PS50159	RIBOSOMAL_S13_1;RIBOSOMAL_S13_2			PF00416	MM_CE	PD_CE	4	4	4	27.7	27.7	27.7	13.749		0	7.5545	995270000	6	0.00212874	4.22391	0.000323725	7.63216	C8V8H2
20.066	20.269	20.1928	19.841	19.8629	19.8381	19.8558	19.9816	20.4938	20.5265	20.6093	C8V8H4	ded1		+	0.207616	1.09038	+	0.658584	4.42166	adenyl nucleotide binding;adenyl ribonucleotide binding;ATP binding;ATPase activity;ATPase activity, coupled;ATP-dependent helicase activity;ATP-dependent RNA helicase activity;binding;catalytic activity;helicase activity;hydrolase activity;hydrolase activity, acting on acid anhydrides;hydrolase activity, acting on acid anhydrides, in phosphorus-containing anhydrides;nucleic acid binding;nucleosi…	biological regulation;cellular metabolic process;cellular nitrogen compound metabolic process;cellular process;chromosome segregation;macromolecule metabolic process;metabolic process;nitrogen compound metabolic process;nucleobase-containing compound metabolic process;primary metabolic process;response to abiotic stimulus;response to osmotic stress;response to stimulus;response to stress;RNA meta…		DEAD;Helicase_C	IPR000629;IPR001650;IPR011545;IPR014001;IPR014014;IPR027417	DEAD/DEAH_box_helicase_dom;Helicase_ATP-bd;Helicase_C;P-loop_NTPase;RNA_helicase_DEAD_Q_motif;RNA-helicase_DEAD-box_CS	PS00039;PS51192;PS51194;PS51195	DEAD_ATP_HELICASE;HELICASE_ATP_BIND_1;HELICASE_CTER;Q_MOTIF	ATP-dependent RNA helicase ded1		PF00270;PF00271	MM_CE	PD_CE	26	26	25	42.7	42.7	41	71.239		0	256.05	19162000000	75	0.0283188	2.09344	9.54003e-05	13.6477	C8V8H4
18.6762	18.7835	18.9092	18.7291	18.7939	18.7331	18.8057	18.8071	18.5503	18.5675	18.4625	C8V8H5	AN10560			-0.0104337	0.070455	+	-0.258145	3.1883		biological regulation;biosynthetic process;cellular component organization;cellular metabolic process;cellular nitrogen compound metabolic process;cellular process;chromatin modification;chromatin organization;chromosome organization;macromolecule metabolic process;metabolic process;nitrogen compound metabolic process;nucleobase-containing compound metabolic process;organelle organization;primary…	RIG-I-like receptor signaling pathway						Ino eighty subunit 1				PD_CE	20	20	20	28.7	28.7	28.7	87.754		0	255.69	2493000000	28	0.763117	-0.197113	0.00033279	-7.54448	C8V8H5
20.702	20.76	20.5076	20.6785	20.4072	20.4767	20.3129	20.3678	20.5104	20.5028	20.4679	C8V8H7	ANIA_04464		+	0.270857	2.2522	+	0.102545	1.22574	catalytic activity;cyclohydrolase activity;hydrolase activity;hydrolase activity, acting on carbon-nitrogen (but not peptide) bonds;hydrolase activity, acting on carbon-nitrogen (but not peptide) bonds, in cyclic amidines;hydroxymethyl-, formyl- and related transferase activity;IMP cyclohydrolase activity;phosphoribosylaminoimidazolecarboxamide formyltransferase activity;transferase activity;tran…	biosynthetic process;cellular metabolic process;cellular nitrogen compound metabolic process;cellular process;heterocycle metabolic process;metabolic process;nitrogen compound metabolic process;nucleobase-containing compound metabolic process;nucleobase-containing small molecule metabolic process;nucleotide metabolic process;primary metabolic process;small molecule metabolic process		AICARFT_IMPCHas;MGS	IPR002695;IPR011607;IPR016193;IPR024050;IPR024051	AICAR_Tfase_dom;AICAR_Tfase_insert_dom;AICARFT_IMPCHas;Cytidine_deaminase-like;MGS-like_dom					PF01808;PF02142	MM_CE	PD_CE	28	28	28	49.4	49.4	49.4	65.061		0	323.31	38475000000	61	0.00212142	4.21453	0.0252252	2.42884	C8V8H7
18.6498	18.6078	18.7068	18.4867	18.5471	18.7486	18.6791	18.6617	18.8961	18.6521	18.7172	C8V8I3	ANIA_04458			-0.0463533	0.312225		0.0959996	0.558855	binding;cation binding;ion binding;metal ion binding;transition metal ion binding;zinc ion binding	catabolic process;cellular component assembly;cellular component organization;cellular macromolecular complex assembly;cellular metabolic process;cellular process;macromolecular complex assembly;macromolecule metabolic process;metabolic process;primary metabolic process;protein metabolic process;proteolysis;proteolysis involved in cellular protein catabolic process;ribonucleoprotein complex assem…		UCH;zf-UBP	IPR001394;IPR001607;IPR013083;IPR028889	Peptidase_C19_UCH;USP_dom;Znf_RING/FYVE/PHD;Znf_UBP	PS50235;PS50271	USP_3;ZF_UBP			PF00443;PF02148			14	14	14	27.3	27.3	27.3	69.025		0	214.82	1335900000	22	0.295808	-0.739925	0.227427	1.22206	C8V8I3
18.0174	18.0014	18.2583	17.9692	17.9881	17.7267	17.6178	17.8372	17.7445	17.8918	18.3275	C8V8I4	ANIA_04457		+	0.269116	1.39465		0.195457	0.506026	catalytic activity;endopeptidase activator activity;endopeptidase activity;endopeptidase regulator activity;enzyme activator activity;enzyme regulator activity;hydrolase activity;peptidase activator activity;peptidase activity;peptidase activity, acting on L-amino acid peptides;peptidase regulator activity;threonine-type endopeptidase activity;threonine-type peptidase activity	catabolic process;cellular metabolic process;cellular process;macromolecule metabolic process;metabolic process;primary metabolic process;protein metabolic process;proteolysis;proteolysis involved in cellular protein catabolic process		Proteasome	IPR001353;IPR016050;IPR023333;IPR029055	Ntn_hydrolases_N;Proteasome_bsu_CS;Proteasome_sua/b;Proteasome_suB-type	PS00854;PS51476	PROTEASOME_BETA_1;PROTEASOME_BETA_2	Proteasome subunit beta type		PF00227	MM_CE		6	6	6	29.6	29.6	29.6	22.727		0	106.77	2166600000	10	0.0129559	2.60659	0.278548	1.12449	C8V8I4
19.4764	19.4345	19.401	19.5408	19.327	19.3706	19.2989	19.3764	19.2283	19.3625	19.3453	C8V8J0	ANIA_04450		+	0.119945	1.83619		-0.0311874	0.313378				TUG-UBL1;UBX	IPR001012;IPR021569;IPR029071	TUG/UBX4;Ubiquitin-rel_dom;UBX_dom	PS50033	UBX			PF00789;PF11470	MM_CE		18	18	18	39.2	39.2	39.2	55.996		0	73.419	3046500000	30	0.00491261	3.3952	0.508107	-0.751889	C8V8J0
22.377	22.3414	22.5677	22.3414	22.2656	21.943	21.9431	21.6365	22.1484	22.2233	22.2656	C8V8J7	ANIA_04443	x	+	0.459811	1.78358		0.265412	0.833242	5-methyltetrahydrofolate-dependent methyltransferase activity;5-methyltetrahydropteroyltriglutamate-homocysteine S-methyltransferase activity;5-methyltetrahydropteroyltri-L-glutamate-dependent methyltransferase activity;binding;catalytic activity;cation binding;ion binding;metal ion binding;methionine synthase activity;methyltransferase activity;S-methyltransferase activity;transferase activity;t…	amine metabolic process;biosynthetic process;cellular amino acid metabolic process;cellular aromatic compound metabolic process;cellular ketone metabolic process;cellular metabolic process;cellular nitrogen compound metabolic process;cellular process;heterocycle metabolic process;metabolic process;nitrogen compound metabolic process;nucleobase-containing compound metabolic process;nucleobase-cont…		Meth_synt_1;Meth_synt_2	IPR002629;IPR006276;IPR013215	Cbl-indep_Met_Synth_N;Cobalamin-indep_Met_synthase;Met_Synth_C/arc					PF01717;PF08267	MM_CE		51	51	51	50.9	50.9	50.9	86.824		0	323.31	292410000000	191	0.00542309	3.29748	0.0813712	1.71603	C8V8J7
16.2349	16.094	16.4905	16.167	16.8116	16.6608	16.5629	16.6949	16.1679	16.1751	16.3992	C8V8J8	ANIA_10559		+	-0.43592	2.31383	+	-0.435152	2.36906	catalytic activity;oxidoreductase activity;oxidoreductase activity, acting on the CH-CH group of donors	lipid metabolic process;metabolic process;primary metabolic process			IPR001104	3-oxo-5_a-steroid_4-DH_C	PS50244	S5A_REDUCTASE				MM_CE	PD_CE	4	4	4	11.4	11.4	11.4	43.381		0	13.898	164320000	4	0.00193615	-4.34388	0.00170405	-4.95269	C8V8J8
19.4493	19.4513	19.8063	19.5731	19.6926	19.6407	19.6448	19.6395	19.509	19.5436	19.5766	C8V8J9	ANIA_10556			-0.0843964	0.445449	+	-0.11135	2.38833	acid-amino acid ligase activity;catalytic activity;ligase activity;ligase activity, forming carbon-nitrogen bonds;small conjugating protein ligase activity;ubiquitin-protein ligase activity;ubiquitin-ubiquitin ligase activity	catabolic process;cellular metabolic process;cellular process;macromolecule metabolic process;metabolic process;primary metabolic process;protein metabolic process;proteolysis;proteolysis involved in cellular protein catabolic process;response to chemical stimulus;response to stimulus;response to stress		U-box;Ufd2P_core	IPR003613;IPR013083;IPR019474	Ub_conjug_fac_E4_core;Ubox_domain;Znf_RING/FYVE/PHD	PS51698	U_BOX			PF04564;PF10408		PD_CE	28	28	28	29.6	29.6	29.6	124.63		0	282.47	5244000000	49	0.186557	-0.994117	0.00166823	-5.00434	C8V8J9
18.167	18.332	18.1458	18.4265	18.5428	18.1342	17.9321	17.9605	18.5522	18.4876	18.7939	C8V8L0	ANIA_05014			0.125457	0.344858	+	0.468844	1.28991	structural constituent of ribosome;structural molecule activity	biosynthetic process;cellular metabolic process;cellular process;macromolecule metabolic process;metabolic process;primary metabolic process;protein metabolic process;translation		Ribosomal_L22e	IPR002671	Ribosomal_L22e					PF01776		PD_CE	8	8	8	60.5	60.5	60.5	14.103		0	65.726	31537000000	20	0.26271	0.804117	0.0211815	2.54951	C8V8L0
16.4126	16.6652	16.6707	16.1376	16.191	16.1073	16.1715	16.1144	17.5036	17.3896	17.7934	C8V8L4	ANIA_05010		+	0.325481	1.3546	+	1.41617	4.42702	binding;nucleic acid binding;RNA binding;snoRNA binding	cellular metabolic process;cellular nitrogen compound metabolic process;cellular process;macromolecule metabolic process;metabolic process;nitrogen compound metabolic process;nucleobase-containing compound metabolic process;primary metabolic process;RNA metabolic process;RNA processing;rRNA processing										MM_CE	PD_CE	5	5	5	17.8	17.8	17.8	30.11		0	16.308	166210000	6	0.0143296	2.53805	9.62199e-05	13.6822	C8V8L4
14.7879	14.6543	14.7833	14.4866	14.6592	14.6124	14.4186	14.6313	14.2978	14.3293	14.4564	C8V8L8	ANIA_10611			0.0976613	0.498178	+	-0.219208	1.45475	acetylglucosaminyltransferase activity;catalytic activity;phosphatidylinositol N-acetylglucosaminyltransferase activity;transferase activity;transferase activity, transferring glycosyl groups;transferase activity, transferring hexosyl groups;UDP-glycosyltransferase activity	biosynthetic process;cellular lipid metabolic process;cellular metabolic process;cellular process;lipid metabolic process;macromolecule metabolic process;macromolecule modification;metabolic process;primary metabolic process;protein lipidation;protein metabolic process;protein modification process		Gpi1	IPR007720	GlcNAc_Gpi1					PF05024		PD_CE	2	2	2	3.8	3.8	3.8	76.067		0	5.9055	75496000	2	0.157442	1.08996	0.0138407	-2.86754	C8V8L8
[truncated: 5,968 more rows]

## Sheet: LFQ
LFQ intensity CE_1	LFQ intensity CE_2	LFQ intensity CE_3	LFQ intensity CE_4	LFQ intensity MM_1	LFQ intensity MM_2	LFQ intensity MM_3	LFQ intensity MM_4	LFQ intensity PD_1	LFQ intensity PD_2	LFQ intensity PD_3	LFQ intensity PD_4	T: Protein IDs	T: Protein IDs	C: Protein names	C: Gene names	Mtase?	C: Student's T-test Significant MM_CE	N: Student's T-test Difference MM_CE	N: -Log Student's T-test p-value MM_CE	C: Student's T-test Significant PD_CE	N: Student's T-test Difference PD_CE	N: -Log Student's T-test p-value PD_CE	C: GOMF name	C: GOBP slim name	C: KEGG name	C: Pfam	C: Keywords	C: Interpro	C: Interpro name	C: Prosite	C: Prosite name	C: Protein name	C: Cross-reference (CAZy)	C: Cross-reference (GeneID)	C: Only identified by site	C: Student's T-test significant	C: Student's T-test significant	N: Peptides	N: Razor + unique peptides	N: Unique peptides	N: Sequence coverage [%]	N: Unique + razor sequence coverage [%]	N: Unique sequence coverage [%]	N: Mol. weight [kDa]	N: Q-value	N: Score	N: Intensity	N: MS/MS count	N: Student's T-test q-value MM_CE
[truncated: 3,903 more rows]
[truncated: 4 more columns]

[truncated: 1 more sheets: Deep proteome]
