# Supplementary material for: A seven-transmembrane methyltransferase catalysing N-terminal histidine methylation of lytic polysaccharide monooxygenases
Source: Research Square preprint supplement (doi:10.21203/rs.3.rs-2289157/v1), 2022-12-21
Supplement: Supplementary file 6 [file cb07eff33ebc7984c3aa682a.xlsx]

## Sheet: Info
Supplementary table 2
This table contains histidine methylation sites identified using MaxQuant from the different proteomics analysis of Aspergillus nidulans. Contaminant and reverse hits were removed from the list.
LFQ: A. nidulans cells grown on different carbon sources were analyzed using a label free approach independently.
TMT: A. nidulans cells grown on different carbon sources were analyzed using TMT-11 tags.
Deep proteome: Equal peptide amounts of A. nidulan grown on different carbon sources were mixed and fractioned to generate a large label-free proteome dataset.
N-term meth-His: Summarizes the N-terminal histidine methylated sites found from the different experiments (LFQ, TMT, deep proteomics analysis).

## Sheet: LFQ
Proteins	Positions within proteins	Leading proteins	Protein	Fasta headers	Localization prob	Score diff	PEP	Score	Delta score	Score for localization	Localization prob CE_1	Score diff CE_1	PEP CE_1	Score CE_1	Localization prob CE_2	Score diff CE_2	PEP CE_2	Score CE_2	Localization prob CE_3	Score diff CE_3	PEP CE_3	Score CE_3	Localization prob CE_4	Score diff CE_4	PEP CE_4	Score CE_4	Localization prob MM_1	Score diff MM_1	PEP MM_1	Score MM_1	Localization prob MM_2	Score diff MM_2	PEP MM_2	Score MM_2	Localization prob MM_3	Score diff MM_3	PEP MM_3	Score MM_3	Localization prob MM_4	Score diff MM_4	PEP MM_4	Score MM_4	Localization prob PD_1	Score diff PD_1	PEP PD_1	Score PD_1	Localization prob PD_2	Score diff PD_2	PEP PD_2
C8V530	1	C8V530	C8V530	tr|C8V530|C8V530_EMENI Uncharacterized protein OS=Emericella nidulans (strain FGSC A4 / ATCC 38163 / CBS 112.46 / NRRL 194 / M139) OX=227321 GN=ANIA_10419 PE=4 SV=1	1	136.604	8.36339e-18	191.53	170.13	136.6	1	94.0587	1.91737e-05	94.059	0	0		NaN	1	191.528	8.36339e-18	191.53	1	136.604	9.4965e-09	136.6
Q5B428	1	Q5B428	Q5B428	tr|Q5B428|Q5B428_EMENI Uncharacterized protein OS=Emericella nidulans (strain FGSC A4 / ATCC 38163 / CBS 112.46 / NRRL 194 / M139) OX=227321 GN=ANIA_04702 PE=4 SV=1	1	123.72	1.23228e-06	217.02	162.24	123.72	1	176.751	2.88572e-05	176.75	1	217.016	1.23228e-06	217.02	1	81.9152	0.00675114	123.98	1	88.3637	0.00363157	126.62	1	93.1105	0.00272737	93.111	1	127.462	0.0108631	127.46	1	127.462	0.00827304	127.46	1	217.016	1.23228e-06	217.02	1	82.7505	0.00844357	82.75	1	136.268	0.000206145
C8VKW1	4	C8VKW1	C8VKW1	tr|C8VKW1|C8VKW1_EMENI Uncharacterized protein OS=Emericella nidulans (strain FGSC A4 / ATCC 38163 / CBS 112.46 / NRRL 194 / M139) OX=227321 GN=ANIA_01939 PE=4 SV=1	1	58.9811	0.0372234	58.981	28.313	58.981																	1	51.7872	0.0544823	51.787	1	58.9811	0.0372234	58.981	0	0		NaN
Q5BD36	4	Q5BD36	Q5BD36	tr|Q5BD36|Q5BD36_EMENI Uncharacterized protein OS=Emericella nidulans (strain FGSC A4 / ATCC 38163 / CBS 112.46 / NRRL 194 / M139) OX=227321 GN=ANIA_01544 PE=4 SV=1	1	44.6108	0.0469554	44.611	26.575	44.611																																	1	44.6108	0.0469554	44.611	0	0
Q5B6P3	6	Q5B6P3	Q5B6P3	sp|Q5B6P3|PNG1_EMENI Protein PNG1 OS=Emericella nidulans (strain FGSC A4 / ATCC 38163 / CBS 112.46 / NRRL 194 / M139) OX=227321 GN=png1 PE=3 SV=1	0.666667	0	0.0338118	44.349	6.7908	44.349	0	0		NaN	0.666667	0	0.0338118	44.349	0	0		NaN	0	0		NaN	0	0		NaN	0	0		NaN	0	0		NaN	0	0		NaN	0	0		NaN	0	0
Q5B6P3	7	Q5B6P3	Q5B6P3	sp|Q5B6P3|PNG1_EMENI Protein PNG1 OS=Emericella nidulans (strain FGSC A4 / ATCC 38163 / CBS 112.46 / NRRL 194 / M139) OX=227321 GN=png1 PE=3 SV=1	0.666667	0	0.0338118	44.349	6.7908	44.349	0	0		NaN	0.666667	0	0.0338118	44.349	0	0		NaN	0	0		NaN	0	0		NaN	0	0		NaN	0	0		NaN	0	0		NaN	0	0		NaN	0	0
Q5B6P3	8	Q5B6P3	Q5B6P3	sp|Q5B6P3|PNG1_EMENI Protein PNG1 OS=Emericella nidulans (strain FGSC A4 / ATCC 38163 / CBS 112.46 / NRRL 194 / M139) OX=227321 GN=png1 PE=3 SV=1	0.666667	0	0.0338118	44.349	6.7908	44.349	0	0		NaN	0.666667	0	0.0338118	44.349	0	0		NaN	0	0		NaN	0	0		NaN	0	0		NaN	0	0		NaN	0	0		NaN	0	0		NaN	0	0
P23753	40	P23753	P23753	sp|P23753|H3_EMENI Histone H3 OS=Emericella nidulans (strain FGSC A4 / ATCC 38163 / CBS 112.46 / NRRL 194 / M139) OX=227321 GN=hhtA PE=3 SV=2	1	46.8795	1.05497e-05	114.4	104.4	46.88	1	74.4602	0.0014945	74.46					1	48.6592	0.0335546	48.659	1	62.3383	0.00265973	62.338	0	0		NaN	0	0		NaN	1	114.401	1.05497e-05	114.4	0	0		NaN	0	0		NaN	0	0
Q5AT88	57	Q5AT88	Q5AT88	tr|Q5AT88|Q5AT88_EMENI Uncharacterized protein OS=Emericella nidulans (strain FGSC A4 / ATCC 38163 / CBS 112.46 / NRRL 194 / M139) OX=227321 GN=ANIA_08492 PE=4 SV=1	1	66.682	0.00939816	66.682	45.394	66.682	1	66.682	0.00939816	66.682	0	0		NaN	0	0		NaN	0	0		NaN													0	0		NaN
Q5AZU9	59	Q5AZU9	Q5AZU9	tr|Q5AZU9|Q5AZU9_EMENI 60S ribosomal protein L44 P (Broad) OS=Emericella nidulans (strain FGSC A4 / ATCC 38163 / CBS 112.46 / NRRL 194 / M139) OX=227321 GN=ANIA_06181 PE=3 SV=1	1	53.3001	1.98951e-05	108.77	42.47	53.3	1	46.9641	4.03588e-05	101.35	1	95.4983	0.000168542	95.498	1	107.344	2.38248e-05	107.34	1	104.144	3.26499e-05	104.14	1	100.086	5.08303e-05	100.09	1	58.2684	0.000882285	58.268	1	50.1084	0.00312292	77.867	1	108.769	1.98951e-05	108.77	0	0		NaN	0	0
Q5AT88	60	Q5AT88	Q5AT88	tr|Q5AT88|Q5AT88_EMENI Uncharacterized protein OS=Emericella nidulans (strain FGSC A4 / ATCC 38163 / CBS 112.46 / NRRL 194 / M139) OX=227321 GN=ANIA_08492 PE=4 SV=1	1	66.682	0.00939816	66.682	45.394	66.682	1	66.682	0.00939816	66.682	0	0		NaN	0	0		NaN	0	0		NaN													0	0		NaN
C8V3H3	68	C8V3H3	C8V3H3	tr|C8V3H3|C8V3H3_EMENI Uncharacterized protein OS=Emericella nidulans (strain FGSC A4 / ATCC 38163 / CBS 112.46 / NRRL 194 / M139) OX=227321 GN=ANIA_05946 PE=4 SV=1	1	43.7692	0.0662258	43.769	10.507	43.769	1	43.7692	0.0662258	43.769
Q5AQS0	104	Q5AQS0	Q5AQS0	tr|Q5AQS0|Q5AQS0_EMENI C2H2 finger domain protein (Kin17), putative (AFU_orthologue AFUA_3G02320) OS=Emericella nidulans (strain FGSC A4 / ATCC 38163 / CBS 112.46 / NRRL 194 / M139) OX=227321 GN=ANIA_09360 PE=4 SV=1	1	42.109	0.033544	42.109	7.3012	42.109																									1	42.109	0.033544	42.109
Q5AQS0	106	Q5AQS0	Q5AQS0	tr|Q5AQS0|Q5AQS0_EMENI C2H2 finger domain protein (Kin17), putative (AFU_orthologue AFUA_3G02320) OS=Emericella nidulans (strain FGSC A4 / ATCC 38163 / CBS 112.46 / NRRL 194 / M139) OX=227321 GN=ANIA_09360 PE=4 SV=1	1	42.109	0.033544	42.109	7.3012	42.109																									1	42.109	0.033544	42.109
P10874	137	P10874	P10874	sp|P10874|TBB2_EMENI Tubulin beta-2 chain OS=Emericella nidulans (strain FGSC A4 / ATCC 38163 / CBS 112.46 / NRRL 194 / M139) OX=227321 GN=tubC PE=3 SV=2	1	72.2922	7.61768e-10	72.292	70.61	72.292																	0	0		NaN													1	72.2922	7.61768e-10	72.292
Q5BH49	148	Q5BH49	Q5BH49	tr|Q5BH49|Q5BH49_EMENI Secretory pathway protein Ssp120, putative (AFU_orthologue AFUA_5G11640) OS=Emericella nidulans (strain FGSC A4 / ATCC 38163 / CBS 112.46 / NRRL 194 / M139) OX=227321 GN=ANIA_00131 PE=4 SV=1	0.999998	57.8389	3.079e-05	64.87	62.222	64.87	0.999998	57.8389	3.079e-05	64.87	0	0		NaN													0.999991	51.0618	6.69999e-05	58.093
Q5BCG6	198	Q5BCG6	Q5BCG6	tr|Q5BCG6|Q5BCG6_EMENI Uncharacterized protein OS=Emericella nidulans (strain FGSC A4 / ATCC 38163 / CBS 112.46 / NRRL 194 / M139) OX=227321 GN=ANIA_01764 PE=4 SV=1	1	55.4411	0.0513603	55.441	17.796	55.441																									1	55.4411	0.0513603	55.441
Q5AW57	238	Q5AW57	Q5AW57	tr|Q5AW57|Q5AW57_EMENI mRNA capping enzyme alpha subunit, putative (AFU_orthologue AFUA_2G05780) OS=Emericella nidulans (strain FGSC A4 / ATCC 38163 / CBS 112.46 / NRRL 194 / M139) OX=227321 GN=ANIA_07473 PE=4 SV=1	1	44.3093	0.0177048	44.309	24.548	44.309																									1	44.3093	0.0177048	44.309
C8V662	333	C8V662	C8V662	tr|C8V662|C8V662_EMENI MIP aquaporin (Eurofung) OS=Emericella nidulans (strain FGSC A4 / ATCC 38163 / CBS 112.46 / NRRL 194 / M139) OX=227321 GN=ANIA_03915 PE=3 SV=1	1	45.368	0.00443629	45.368	35.363	45.368					0	0		NaN	0	0		NaN	0	0		NaN	1	45.368	0.00443629	45.368									0	0		NaN
C8V662	334	C8V662	C8V662	tr|C8V662|C8V662_EMENI MIP aquaporin (Eurofung) OS=Emericella nidulans (strain FGSC A4 / ATCC 38163 / CBS 112.46 / NRRL 194 / M139) OX=227321 GN=ANIA_03915 PE=3 SV=1	1	45.368	0.00443629	45.368	35.363	45.368					0	0		NaN	0	0		NaN	0	0		NaN	1	45.368	0.00443629	45.368									0	0		NaN
Q5AWC6	336	Q5AWC6	Q5AWC6	tr|Q5AWC6|Q5AWC6_EMENI Alpha/beta hydrolase, putative (AFU_orthologue AFUA_3G01280) OS=Emericella nidulans (strain FGSC A4 / ATCC 38163 / CBS 112.46 / NRRL 194 / M139) OX=227321 GN=ANIA_07404 PE=4 SV=1	1	45.161	0.00337854	56.563	9.3653	45.161	1	56.2581	0.00337854	56.258									1	48.4235	0.00736566	48.423	1	48.4235	0.0573097	48.423					1	56.5631	0.018858	56.563					1	45.161	0.0162829	45.161
C8V662	337	C8V662	C8V662	tr|C8V662|C8V662_EMENI MIP aquaporin (Eurofung) OS=Emericella nidulans (strain FGSC A4 / ATCC 38163 / CBS 112.46 / NRRL 194 / M139) OX=227321 GN=ANIA_03915 PE=3 SV=1	1	45.368	0.00443629	45.368	35.363	45.368					0	0		NaN	0	0		NaN	0	0		NaN	1	45.368	0.00443629	45.368									0	0		NaN
Q5AWC6	339	Q5AWC6	Q5AWC6	tr|Q5AWC6|Q5AWC6_EMENI Alpha/beta hydrolase, putative (AFU_orthologue AFUA_3G01280) OS=Emericella nidulans (strain FGSC A4 / ATCC 38163 / CBS 112.46 / NRRL 194 / M139) OX=227321 GN=ANIA_07404 PE=4 SV=1	1	45.161	0.00337854	56.563	9.3653	45.161	1	56.2581	0.00337854	56.258									1	48.4235	0.00736566	48.423	1	48.4235	0.0573097	48.423					1	56.5631	0.018858	56.563					1	45.161	0.0162829	45.161
Q5B0V1	340	Q5B0V1	Q5B0V1	tr|Q5B0V1|Q5B0V1_EMENI Nuclear migration protein, putative (AFU_orthologue AFUA_2G07730) OS=Emericella nidulans (strain FGSC A4 / ATCC 38163 / CBS 112.46 / NRRL 194 / M139) OX=227321 GN=ANIA_05829 PE=4 SV=1	1	42.0009	0.0208074	42.001	22.758	42.001	1	42.0009	0.0208074	42.001	0	0		NaN	0	0		NaN	0	0		NaN
Q5B0V1	345	Q5B0V1	Q5B0V1	tr|Q5B0V1|Q5B0V1_EMENI Nuclear migration protein, putative (AFU_orthologue AFUA_2G07730) OS=Emericella nidulans (strain FGSC A4 / ATCC 38163 / CBS 112.46 / NRRL 194 / M139) OX=227321 GN=ANIA_05829 PE=4 SV=1	1	42.0009	0.0208074	42.001	22.758	42.001	1	42.0009	0.0208074	42.001	0	0		NaN	0	0		NaN	0	0		NaN
Q5BBW4	417	Q5BBW4	Q5BBW4	tr|Q5BBW4|Q5BBW4_EMENI Ubiquitin-protein ligase (Tom1), putative (AFU_orthologue AFUA_4G10780) OS=Emericella nidulans (strain FGSC A4 / ATCC 38163 / CBS 112.46 / NRRL 194 / M139) OX=227321 GN=ANIA_01966 PE=4 SV=1	1	42.5986	0.0183152	42.599	16.977	42.599																	1	42.5986	0.0183152	42.599	0	0		NaN	0	0		NaN					0	0		NaN
Q5B4Q7	436	Q5B4Q7	Q5B4Q7	tr|Q5B4Q7|Q5B4Q7_EMENI Carboxylic ester hydrolase OS=Emericella nidulans (strain FGSC A4 / ATCC 38163 / CBS 112.46 / NRRL 194 / M139) OX=227321 GN=ANIA_04473 PE=3 SV=1	1	42.109	0.00588903	65.038	47.218	42.109	1	65.0378	0.00588903	65.038					0	0		NaN	1	55.6761	0.0146143	55.676	0	0		NaN	0	0		NaN									0	0		NaN	1	42.109	0.040449
Q5B5T1	503	Q5B5T1	Q5B5T1	tr|Q5B5T1|Q5B5T1_EMENI Flavin-containing amine oxidasedehydrogenase, putative (AFU_orthologue AFUA_6G11670) OS=Emericella nidulans (strain FGSC A4 / ATCC 38163 / CBS 112.46 / NRRL 194 / M139) OX=227321 GN=ANIA_04099 PE=4 SV=1	1	59.3497	0.0509556	59.35	39.046	59.35																									1	59.3497	0.0509556	59.35
C8VAK3	527	C8VAK3	C8VAK3	tr|C8VAK3|C8VAK3_EMENI MYB DNA-binding domain protein (AFU_orthologue AFUA_3G07070) OS=Emericella nidulans (strain FGSC A4 / ATCC 38163 / CBS 112.46 / NRRL 194 / M139) OX=227321 GN=ANIA_04813 PE=4 SV=1	0.999214	31.0409	0.0386088	58.37	38.066	58.37	0	0		NaN	0	0		NaN	0	0		NaN	0	0		NaN	0	0		NaN	0.999214	31.0409	0.0386088	58.37	0	0		NaN	0	0		NaN					0	0
H9D0P5	571	H9D0P5	H9D0P5	tr|H9D0P5|H9D0P5_EMENI Cytochrome c oxidase subunit 1 OS=Emericella nidulans (strain FGSC A4 / ATCC 38163 / CBS 112.46 / NRRL 194 / M139) OX=227321 GN=ANID_20014 PE=3 SV=1	1	124.983	6.40635e-06	170.24	158.88	124.98	1	143.01	0.00541401	143.01	1	133.548	0.00539234	133.55	1	152.63	0.0017656	152.63	1	170.24	6.40635e-06	170.24	1	142.789	0.00549782	142.79	1	101.644	0.0187171	101.64	1	137.62	0.00551876	137.62	1	138.098	0.00553358	138.1	1	82.4525	0.045501	82.452	1	124.983	0.00487225
Q5AWN3	779	Q5AWN3	Q5AWN3	tr|Q5AWN3|Q5AWN3_EMENI SWI-SNF complex subunit (Snf5), putative (AFU_orthologue AFUA_2G16840) OS=Emericella nidulans (strain FGSC A4 / ATCC 38163 / CBS 112.46 / NRRL 194 / M139) OX=227321 GN=ANIA_07297 PE=4 SV=1	1	40.3516	0.034689	40.352	14.309	40.352
Q5B027;Q5B1W7	1;1	Q5B027;Q5B1W7	Q5B027	tr|Q5B027|Q5B027_EMENI LPMO_10 Uncharacterized protein OS=Emericella nidulans (strain FGSC A4 / ATCC 38163 / CBS 112.46 / NRRL 194 / M139) OX=227321 GN=ANIA_06103 PE=4 SV=1;tr|Q5B1W7|Q5B1W7_EMENI LPMO_10 Uncharacterized protein OS=Emericella nidulans (stra	1	118.334	0.00901222	118.33	85.522	118.33	0	0		NaN	1	84.0827	0.054489	84.083	1	86.1356	0.0418781	86.136	1	118.334	0.00901222	118.33	0	0		NaN																	0	0
C8V2C5;C8V838	200;218	C8V2C5	C8V2C5	tr|C8V2C5|C8V2C5_EMENI Uncharacterized protein OS=Emericella nidulans (strain FGSC A4 / ATCC 38163 / CBS 112.46 / NRRL 194 / M139) OX=227321 GN=ANIA_10787 PE=4 SV=1;tr|C8V838|C8V838_EMENI Uncharacterized protein OS=Emericella nidulans (strain FGSC A4 / ATC	1	45.9154	0.05161	45.915	31.658	45.915													1	45.9154	0.05161	45.915									0	0		NaN
[truncated: 155 more columns]

## Sheet: TMT
Proteins	Positions within proteins	Leading proteins	Protein	Fasta headers	Localization prob	Score diff	PEP	Score	Delta score	Score for localization	Localization prob Anid	Score diff Anid	PEP Anid	Score Anid	Diagnostic peak	Number of Histidine Methyl (H)	Amino acid	Sequence window	Modification window	Peptide window coverage	Histidine Methyl (H) Probabilities	Histidine Methyl (H) Score diffs	Position in peptide	Charge	Mass error [ppm]	Reporter intensity corrected 0___1	Reporter intensity corrected 0___2	Reporter intensity corrected 0___3	Reporter intensity corrected 1___1	Reporter intensity corrected 1___2	Reporter intensity corrected 1___3	Reporter intensity corrected 2___1	Reporter intensity corrected 2___2	Reporter intensity corrected 2___3	Reporter intensity corrected 3___1	Reporter intensity corrected 3___2	Reporter intensity corrected 3___3	Reporter intensity corrected 4___1	Reporter intensity corrected 4___2	Reporter intensity corrected 4___3	Reporter intensity corrected 5___1	Reporter intensity corrected 5___2	Reporter intensity corrected 5___3	Reporter intensity corrected 6___1	Reporter intensity corrected 6___2	Reporter intensity corrected 6___3	Reporter intensity corrected 7___1	Reporter intensity corrected 7___2	Reporter intensity corrected 7___3
Q5B428	1	Q5B428	Q5B428		1	78.0978	0.000130002	199.02	168.67	78.098	1	78.0978	0.000130002	199.02		1	H	_______________HTVIVYPGYRGNNLHT	X;X;X;X;X;X;X;X;X;X;X;X;X;X;X;Histidine Methyl (H);X;X;X;X;X;X;X;X;X;X;X;X;X;X;X	XXXXXXXXXXXXXXXPPPPPPPPPPXXXXXX	H(1)TVIVYPGYR	H(78.1)TVIVYPGYR	1	3	-1.1364	61045	0	0	49524	0	0	73650	0	0	62773	0	0	107310	0	0	144520	0	0	78126	0	0	102200	0	0
Q5AR18	2	Q5AR18	Q5AR18		1	55.7166	0.0247391	55.717	40.635	55.717	1	55.7166	0.0247391	55.717		1	H	______________MHTSEEIKAAMEKWCRD	X;X;X;X;X;X;X;X;X;X;X;X;X;X;Oxidation (M);Histidine Methyl (H);X;X;X;X;X;X;X;X;X;X;X;X;X;X;X	XXXXXXXXXXXXXXPPPPPPPPXXXXXXXXX	MH(1)TSEEIK	MH(55.72)TSEEIK	2	2	-2.7668	24652	0	0	24134	0	0	31978	0	0	25823	0	0	37120	0	0	43075	0	0	27335	0	0	33773	0	0
C8VN58	3	C8VN58	C8VN58		1	40.4964	0.0522002	40.496	7.0876	40.496	1	40.4964	0.0522002	40.496		1	H	_____________MRHNRLFNPIRPLRWSFP	X;X;X;X;X;X;X;X;X;X;X;X;X;Oxidation (M);X;Histidine Methyl (H);Deamidation (NQ);X;X;X;X;X;X;X;X;X;X;X;X;X;X	XXXXXXXXXXXXXPPPPPPPPPPPXXXXXXX	MRH(1)NRLFNPIR	MRH(40.5)NRLFNPIR	3	3	-2.8057	14162	0	0	10886	0	0	15273	0	0	15124	0	0	26053	0	0	27359	0	0	23012	0	0	25561	0	0
C8VDD9	4	C8VDD9	C8VDD9		1	53.089	0.0226952	53.089	6.6322	53.089	1	53.089	0.0226952	53.089		2	H	____________MDPHSLPAHDTRRRRNALA	X;X;X;X;X;X;X;X;X;X;X;X;Oxidation (M);X;X;Histidine Methyl (H);X;X;X;X;Histidine Methyl (H);X;X;X;X;X;X;X;X;X;X	XXXXXXXXXXXXPPPPPPPPPPPPXXXXXXX	MDPH(1)SLPAH(1)DTR	MDPH(53.09)SLPAH(53.09)DTR	4	2	-3.5717	0	28806	0	0	19447	0	0	44342	0	0	12151	0	0	8874.2	0	0	8335.6	0	0	5485.9	0	0	5222.2	0
Q5AS51	4	Q5AS51	Q5AS51		1	44.601	0.0425294	44.601	7.9698	44.601	1	44.601	0.0425294	44.601		1	H	____________MSLHSNAASRSVFPKGPSF	X;X;X;X;X;X;X;X;X;X;X;X;Oxidation (M);X;X;Histidine Methyl (H);X;Deamidation (NQ);X;X;X;X;X;X;X;X;X;X;X;X;X	XXXXXXXXXXXXPPPPPPPPPPPPPPPXXXX	MSLH(1)SNAASRSVFPK	MSLH(44.6)SNAASRSVFPK	4	3	1.113	41005	0	0	64035	0	0	54784	0	0	46320	0	0	63420	0	0	44310	0	0	29449	0	0	25729	0	0
Q5B7M5	4	Q5B7M5	Q5B7M5		1	54.9816	0.0234589	54.982	8.6296	54.982	1	54.9816	0.0234589	54.982		1	H	____________MFSHTIKRRRLSESPGGSS	X;X;X;X;X;X;X;X;X;X;X;X;Oxidation (M);X;X;Histidine Methyl (H);Phospho (STY);X;X;X;X;X;X;X;X;X;X;X;X;X;X	XXXXXXXXXXXXPPPPPPPPPXXXXXXXXXX	MFSH(1)TIKRR	MFSH(54.98)TIKRR	4	3	3.5078	21589	0	0	16220	0	0	25426	0	0	22841	0	0	20268	0	0	25202	0	0	14916	0	0	18913	0	0
C8V321	7	C8V321	C8V321		1	44.2031	0.0381591	44.203	12.709	44.203	1	44.2031	0.0381591	44.203		1	H	_________MSQPVYHYLALGRLGRGEVLNL	X;X;X;X;X;X;X;X;X;X;X;Deamidation (NQ);X;X;Phospho (STY);Histidine Methyl (H);X;X;X;X;X;X;X;X;X;X;X;X;X;X;X	XXXXXXXXXXPPPPPPPPPPPPXXXXXXXXX	SQPVYH(1)YLALGR	SQPVYH(44.2)YLALGR	6	2	4.0077	69231	0	0	58237	0	0	59812	0	0	69224	0	0	6910.5	0	0	9475.3	0	0	5250.4	0	0	6769.7	0	0
Q5AXA3	7	Q5AXA3	Q5AXA3		0.512698	0.22064	0.0290842	47.823	17.253	47.823	0.512698	0.22064	0.0290842	47.823		1	H	_________MLYNEAHPGHRARDELCLGWAS	X;X;X;X;X;X;X;X;X;X;X;X;Deamidation (NQ);X;X;Histidine Methyl (H);X;X;X;X;X;X;X;X;X;X;X;X;X;X;X	XXXXXXXXXXPPPPPPPPPPPPXXXXXXXXX	LYNEAH(0.513)PGH(0.487)RAR	LYNEAH(0.22)PGH(-0.22)RAR	6	2	-0.97382	8673.1	0	0	9711	0	0	14377	0	0	9712.3	0	0	10650	0	0	13247	0	0	13803	0	0	11083	0	0
Q92203	7	Q92203	Q92203		0.5	0	0.0421044	40.384	22.683	40.384	0.5	0	0.0421044	40.384		1	H	_________MATNITHHAGITRNERNQLRKQ	X;X;X;X;X;X;X;X;X;Oxidation (M);X;X;X;X;X;Histidine Methyl (H);X;X;X;X;X;X;X;X;X;Deamidation (NQ);Deamidation (NQ);X;X;X;X	XXXXXXXXXPPPPPPPPPPPPPPPPPPPPXX	MATNITH(0.5)H(0.5)AGITRNERNQLR	MATNITH(0)H(0)AGITRNERNQLR	7	3	-2.3856	1370	0	0	1742.9	0	0	2143.6	0	0	2082.8	0	0	1995.9	0	0	2032.8	0	0	1885.7	0	0	1904.4	0	0
C8VUY4	8	C8VUY4	C8VUY4		1	40.962	0.0377786	40.962	9.5726	40.962	1	40.962	0.0377786	40.962		1	H	________MFFNRAYHQSIAVLRQFASPYPR	X;X;X;X;X;X;X;X;Oxidation (M);X;X;Deamidation (NQ);X;X;X;Histidine Methyl (H);X;Phospho (STY);X;X;X;X;X;X;X;X;X;X;X;X;X	XXXXXXXXPPPPPPPPPPPPPPPXXXXXXXX	MFFNRAYH(1)QSIAVLR	MFFNRAYH(40.96)QSIAVLR	8	4	1.9478	20433	0	0	21865	0	0	22893	0	0	35219	0	0	16514	0	0	22672	0	0	12187	0	0	14906	0	0
Q5B682	8	Q5B682	Q5B682		1	66.5464	0.0285111	66.546	14.144	66.546	1	66.5464	0.0285111	66.546		2	H	________MSISPGNHHRRRSSVLTGAGPSQ	X;X;X;X;X;X;X;X;X;X;X;X;X;X;Deamidation (NQ);Histidine Methyl (H);Histidine Methyl (H);X;X;X;X;X;X;X;X;X;X;X;X;X;X	XXXXXXXXXPPPPPPPPPXXXXXXXXXXXXX	SISPGNH(1)H(1)R	SISPGNH(66.55)H(66.55)R	7	2	-0.87948	0	24413	0	0	28558	0	0	32932	0	0	27017	0	0	44119	0	0	38630	0	0	33502	0	0	24589	0
Q92203	8	Q92203	Q92203		0.5	0	0.0421044	40.384	22.683	40.384	0.5	0	0.0421044	40.384		1	H	________MATNITHHAGITRNERNQLRKQK	X;X;X;X;X;X;X;X;X;X;X;X;X;X;X;X;X;X;X;X;X;X;X;X;X;X;X;X;X;X;X	XXXXXXXXXXXXXXXXXXXXXXXXXXXXXXX	MATNITH(0.5)H(0.5)AGITRNERNQLR	MATNITH(0)H(0)AGITRNERNQLR	8	3	-2.3856	1370	0	0	1742.9	0	0	2143.6	0	0	2082.8	0	0	1995.9	0	0	2032.8	0	0	1885.7	0	0	1904.4	0	0
C8VDD9	9	C8VDD9	C8VDD9		1	53.089	0.0226952	53.089	6.6322	53.089	1	53.089	0.0226952	53.089		2	H	_______MDPHSLPAHDTRRRRNALACNTCR	X;X;X;X;X;X;X;Oxidation (M);X;X;Histidine Methyl (H);X;X;X;X;Histidine Methyl (H);X;X;X;X;X;X;X;X;X;X;X;X;X;X;X	XXXXXXXPPPPPPPPPPPPXXXXXXXXXXXX	MDPH(1)SLPAH(1)DTR	MDPH(53.09)SLPAH(53.09)DTR	9	2	-3.5717	0	28806	0	0	19447	0	0	44342	0	0	12151	0	0	8874.2	0	0	8335.6	0	0	5485.9	0	0	5222.2	0
Q5AZL4	9	Q5AZL4	Q5AZL4		0.991748	20.8262	0.0412795	53.08	30.163	53.08	0.991748	20.8262	0.0412795	53.08		1	H	_______MAPTSTVQHHHRSTTKTTHKPYKS	X;X;X;X;X;X;X;X;X;X;X;X;X;X;Deamidation (NQ);Histidine Methyl (H);X;X;X;X;X;X;X;X;X;X;X;X;X;X;X	XXXXXXXXPPPPPPPPPPPXXXXXXXXXXXX	APTSTVQH(0.992)H(0.008)HR	APTSTVQH(20.83)H(-20.83)H(-42.75)R	8	4	2.592	10257	0	0	8417	0	0	19136	0	0	9841.4	0	0	10968	0	0	12102	0	0	8086.8	0	0	9219.2	0	0
Q5B682	9	Q5B682	Q5B682		1	66.5464	0.0285111	66.546	14.144	66.546	1	66.5464	0.0285111	66.546		2	H	_______MSISPGNHHRRRSSVLTGAGPSQP	X;X;X;X;X;X;X;X;X;X;X;X;X;Deamidation (NQ);Histidine Methyl (H);Histidine Methyl (H);X;X;X;X;X;X;X;X;X;X;X;X;X;X;X	XXXXXXXXPPPPPPPPPXXXXXXXXXXXXXX	SISPGNH(1)H(1)R	SISPGNH(66.55)H(66.55)R	8	2	-0.87948	0	24413	0	0	28558	0	0	32932	0	0	27017	0	0	44119	0	0	38630	0	0	33502	0	0	24589	0
C8V3F8	13	C8V3F8	C8V3F8		1	57.5984	0.022249	57.598	31.084	57.598	1	57.5984	0.022249	57.598		1	H	___MPQQSKQSKNQQHPNIIKTLKKIQDLAV	X;X;X;X;X;X;X;X;X;X;X;X;Deamidation (NQ);Deamidation (NQ);X;Histidine Methyl (H);X;Deamidation (NQ);X;X;X;X;X;X;X;X;X;X;X;X;X	XXXXXXXXXXXXPPPPPPPPPXXXXXXXXXX	NQQH(1)PNIIK	NQQH(57.6)PNIIK	4	3	-0.047988	84137	0	0	61519	0	0	85735	0	0	67280	0	0	56661	0	0	61223	0	0	34008	0	0	44264	0	0
Q96WX8	17	Q96WX8	Q96WX8		1	54.4709	0.023763	54.471	8.3128	54.471	1	54.4709	0.023763	54.471		1	H	TSLDSILADKYPAKAHARRVAEGLKALGHSG	X;X;X;X;X;X;X;X;X;X;X;X;X;X;X;Histidine Methyl (H);X;X;X;X;X;X;X;X;X;X;X;X;X;X;X	XXXXXXXXXXXXXXPPPPPPPPPPPXXXXXX	AH(1)ARRVAEGLK	AH(54.47)ARRVAEGLK	2	4	-2.6053	49904	0	0	28385	0	0	29093	0	0	40634	0	0	49004	0	0	54100	0	0	24299	0	0	36210	0	0
Q5AQC2	20	Q5AQC2	Q5AQC2		1	76.6789	0.0364238	76.679	7.8328	76.679	1	76.6789	0.0364238	76.679		1	H	PVVFAAQNPSAVKELHATIQCGVRPKGAGAN	X;X;X;X;X;X;X;X;X;X;X;X;X;X;X;Histidine Methyl (H);X;Phospho (STY);X;X;X;X;X;X;X;X;X;X;X;X;X	XXXXXXXXXXXXXPPPPPPPPPPPXXXXXXX	ELH(1)ATIQCGVR	ELH(76.68)ATIQCGVR	3	2	0.63485	12877	0	0	12303	0	0	19460	0	0	11693	0	0	13914	0	0	14531	0	0	12550	0	0	12533	0	0
Q5AZ60	23	Q5AZ60	Q5AZ60		1	94.3627	0.0153053	94.363	26.637	94.363	1	94.3627	0.0153053	94.363		1	H	AKIIARRSADRGYAEHGGWLKTYHTFSFASY	X;X;X;X;X;X;X;X;X;X;X;X;X;X;X;Histidine Methyl (H);X;X;X;X;X;X;X;X;X;X;X;X;X;X;X	XXXXXXXPPPPPPPPPPPPPPXXXXXXXXXX	SADRGYAEH(1)GGWLK	SADRGYAEH(94.36)GGWLK	9	2	-3.2588	22470	0	0	17197	0	0	22229	0	0	30023	0	0	12982	0	0	18915	0	0	7892.4	0	0	11153	0	0
Q5BA75	23	Q5BA75	Q5BA75		1	90.827	0.000918528	90.827	34.569	90.827	1	90.827	0.000918528	90.827		2	H	GQRARDSVNLAKRASHLHNATASGKLPKSDF	X;Deamidation (NQ);X;X;X;X;Phospho (STY);X;Deamidation (NQ);X;X;X;X;X;X;Histidine Methyl (H);X;Histidine Methyl (H);Deamidation (NQ);X;Phospho (STY);X;X;X;X;X;X;X;X;X;X	XXXXXXXXXXXXXPPPPPPPPPPPPXXXXXX	ASH(1)LH(1)NATASGK	ASH(90.83)LH(90.83)NATASGK	3	2	4.0234	0	25169	0	0	13519	0	0	14533	0	0	20319	0	0	14861	0	0	24929	0	0	8760.1	0	0	8729.2	0
Q5B2G6	25	Q5B2G6	Q5B2G6		0.999996	53.6814	0.0154022	73.985	41.977	73.985	0.999996	53.6814	0.0154022	73.985		1	H	LPFSKRAMHALINSQHAKQFSKDITRWGVIQ	X;X;X;X;X;X;X;X;X;X;X;X;Deamidation (NQ);X;Deamidation (NQ);Histidine Methyl (H);X;X;X;X;X;X;X;X;X;X;X;X;X;X;X	XXXXXXPPPPPPPPPPPPXXXXXXXXXXXXX	AMHALINSQH(1)AK	AMH(-53.68)ALINSQH(53.68)AK	10	2	-2.4438	17682	0	0	17563	0	0	39647	0	0	36659	0	0	35069	0	0	88879	0	0	33240	0	0	25640	0	0
Q5BA75	25	Q5BA75	Q5BA75		1	90.827	0.000918528	90.827	34.569	90.827	1	90.827	0.000918528	90.827		2	H	RARDSVNLAKRASHLHNATASGKLPKSDFRF	X;X;X;X;Phospho (STY);X;Deamidation (NQ);X;X;X;X;X;X;Histidine Methyl (H);X;Histidine Methyl (H);Deamidation (NQ);X;Phospho (STY);X;X;X;X;X;X;X;X;X;X;X;X	XXXXXXXXXXXPPPPPPPPPPPPXXXXXXXX	ASH(1)LH(1)NATASGK	ASH(90.83)LH(90.83)NATASGK	5	2	4.0234	0	25169	0	0	13519	0	0	14533	0	0	20319	0	0	14861	0	0	24929	0	0	8760.1	0	0	8729.2	0
Q5BFV6	25	Q5BFV6	Q5BFV6		1	55.5671	0.0265598	55.567	6.7708	55.567	1	55.5671	0.0265598	55.567		1	H	LGQRSDQPRYLASYMHAGMVERQTNRDVSHQ	X;X;X;X;X;X;X;X;X;X;X;X;X;X;Oxidation (M);Histidine Methyl (H);X;X;Oxidation (M);X;X;X;X;X;X;X;X;X;X;X;X	XXXXXXXXXPPPPPPPPPPPPPXXXXXXXXX	YLASYMH(1)AGMVER	YLASYMH(55.57)AGMVER	7	2	2.5975	100690	0	0	24449	0	0	275800	0	0	15376	0	0	0	0	0	3462.8	0	0	2663.6	0	0	2091.7	0	0
Q5BH45	25	Q5BH45	Q5BH45		0.5	0	0.0212198	40.404	18.005	40.404	0.5	0	0.0212198	40.404		1	H	AVHLSREAVELRDSGHHEAAVRNLREALALA	X;X;X;X;X;X;X;X;X;X;X;X;X;Phospho (STY);X;Histidine Methyl (H);X;X;X;X;X;X;Deamidation (NQ);X;X;X;X;X;X;X;X	XXXXXXXXXXXXPPPPPPPPPPPPPPPPPPP	DSGH(0.5)H(0.5)EAAVRNLREALALAPDNATVK	DSGH(0)H(0)EAAVRNLREALALAPDNATVK	4	3	-2.8111	10410	0	0	5434.3	0	0	3742.8	0	0	7411.6	0	0	9340.3	0	0	8391.1	0	0	4703	0	0	5267.8	0	0
C8V7F2	26	C8V7F2	C8V7F2		1	68.8931	0.0170244	68.893	40.88	68.893	1	68.8931	0.0170244	68.893		1	H	PNPLKRTSISSASTGHQSKRPRMHPLRQTSF	X;X;X;X;X;X;X;X;X;X;X;X;Phospho (STY);Phospho (STY);X;Histidine Methyl (H);X;X;X;X;X;X;X;X;X;X;X;X;X;Phospho (STY);X	XXXXXXPPPPPPPPPPPPPXXXXXXXXXXXX	TSISSASTGH(1)QSK	TSISSASTGH(68.89)QSK	10	2	3.8617	5675.6	0	0	4477.9	0	0	6700.6	0	0	7823.8	0	0	3656.8	0	0	4373.1	0	0	2845.4	0	0	3235.4	0	0
Q5BH45	26	Q5BH45	Q5BH45		0.5	0	0.0212198	40.404	18.005	40.404	0.5	0	0.0212198	40.404		1	H	VHLSREAVELRDSGHHEAAVRNLREALALAP	X;X;X;X;X;X;X;X;X;X;X;X;X;X;X;X;X;X;X;X;X;X;X;X;X;X;X;X;X;X;X	XXXXXXXXXXXXXXXXXXXXXXXXXXXXXXX	DSGH(0.5)H(0.5)EAAVRNLREALALAPDNATVK	DSGH(0)H(0)EAAVRNLREALALAPDNATVK	5	3	-2.8111	10410	0	0	5434.3	0	0	3742.8	0	0	7411.6	0	0	9340.3	0	0	8391.1	0	0	4703	0	0	5267.8	0	0
Q5B0G3	29	Q5B0G3	Q5B0G3		1	44.1352	0.0415885	44.135	6.5768	44.135	1	44.1352	0.0415885	44.135		1	H	SRSMLAIFRLDFQYEHKRSARIRITVSDGG_	X;X;X;X;X;X;X;X;X;X;X;X;Deamidation (NQ);Phospho (STY);X;Histidine Methyl (H);X;X;X;X;X;X;X;X;X;X;X;X;X;X;X	XXXXXXXXXPPPPPPPPXXXXXXXXXXXXXX	LDFQYEH(1)K	LDFQYEH(44.14)K	7	2	1.7319	15831	0	0	15283	0	0	23226	0	0	20510	0	0	19347	0	0	17937	0	0	12620	0	0	14142	0	0
Q5BFB4	33	Q5BFB4	Q5BFB4		0.5	0	0.0144851	70.552	19.643	70.552	0.5	0	0.0144851	70.552		1	H	DSGEFPPIASKVPKTHSNHLQINYLARQYAD	X;X;X;X;X;X;X;X;X;X;X;X;X;X;X;Histidine Methyl (H);X;Deamidation (NQ);X;X;Deamidation (NQ);X;X;X;X;X;X;X;X;X;X	XXXXXXXXXXXXXXPPPPPPPPPPPPPXXXX	TH(0.5)SNH(0.5)LQINYLAR	TH(0)SNH(0)LQINYLAR	2	2	-2.8031	48552	0	0	29675	0	0	43097	0	0	34302	0	0	32989	0	0	35017	0	0	18505	0	0	19140	0	0
C8VHJ4	35	C8VHJ4	C8VHJ4		1	71.3424	0.0518991	71.342	28.473	71.342	1	71.3424	0.0518991	71.342		1	H	VAGSVPDADAPTKQSHRSFKRKFAKLKIQFE	X;X;X;Phospho (STY);X;X;X;X;X;X;X;X;X;Deamidation (NQ);Phospho (STY);Histidine Methyl (H);X;X;X;X;X;X;X;X;X;X;X;X;X;X;X	XXXXXXXXXXXXXPPPPPPPXXXXXXXXXXX	QSH(1)RSFK	QSH(71.34)RSFK	3	2	-2.6904	31703	0	0	23367	0	0	45138	0	0	59773	0	0	38288	0	0	64954	0	0	25946	0	0	31474	0	0
Q5BFB4	36	Q5BFB4	Q5BFB4		0.5	0	0.0144851	70.552	19.643	70.552	0.5	0	0.0144851	70.552		1	H	EFPPIASKVPKTHSNHLQINYLARQYADNLP	X;X;X;X;X;X;X;X;X;X;X;X;X;X;X;X;X;X;X;X;X;X;X;X;X;X;X;X;X;X;X	XXXXXXXXXXXXXXXXXXXXXXXXXXXXXXX	TH(0.5)SNH(0.5)LQINYLAR	TH(0)SNH(0)LQINYLAR	5	2	-2.8031	48552	0	0	29675	0	0	43097	0	0	34302	0	0	32989	0	0	35017	0	0	18505	0	0	19140	0	0
Q5BF49	44	Q5BF49	Q5BF49		1	40.7239	0.0407493	40.724	10.914	40.724	1	40.7239	0.0407493	40.724		1	H	TLETDINTPRLLDSQHVASKFARGMPTASWD	X;X;X;X;X;X;X;X;X;X;X;X;X;Phospho (STY);Deamidation (NQ);Histidine Methyl (H);X;X;X;X;X;X;X;X;X;X;X;X;X;X;X	XXXXXXXXXXPPPPPPPPPPXXXXXXXXXXX	LLDSQH(1)VASK	LLDSQH(40.72)VASK	6	2	-0.44603	0	0	0	0	0	0	0	0	0	0	0	0	0	0	0	0	0	0	0	0	0	0	0	0
C8V9H4	46	C8V9H4	C8V9H4		0.999582	37.5393	0.00361683	49.942	42.507	49.942	0.999582	37.5393	0.00361683	49.942		1	H	GSDDDNPEMELGDNEHVPPFLRQSVLDIRHK	X;Phospho (STY);X;X;X;Deamidation (NQ);X;X;X;X;X;X;X;X;X;Histidine Methyl (H);X;X;X;X;X;X;X;X;X;X;X;X;X;X;X	PPPPPPPPPPPPPPPPPPPPPPXXXXXXXXX	SHPDNEDGVGVVDGSDDDNPEMELGDNEH(1)VPPFLR	SH(-37.54)PDNEDGVGVVDGSDDDNPEMELGDNEH(37.54)VPPFLR	29	4	-2.5908	448.32	0	0	263.84	0	0	481.02	0	0	273.6	0	0	258.83	0	0	310.14	0	0	138.03	0	0	169.95	0	0
Q5AXH9	46	Q5AXH9	Q5AXH9		1	50.0394	0.0341844	50.039	6.9159	50.039	1	50.0394	0.0341844	50.039		3	H	QNSRHRRISSPKRLLHHHAKHTNHLGDGQAY	X;X;X;X;X;X;X;X;X;X;X;X;X;X;X;Histidine Methyl (H);Histidine Methyl (H);Histidine Methyl (H);X;X;X;X;X;X;X;X;X;X;X;X;X	XXXXXXXXXXXXXPPPPPPPXXXXXXXXXXX	LLH(1)H(1)H(1)AK	LLH(50.04)H(50.04)H(50.04)AK	3	2	-0.73741	0	0	14125	0	0	11409	0	0	25435	0	0	11889	0	0	10463	0	0	14268	0	0	8531.5	0	0	10737
Q5AXH9	47	Q5AXH9	Q5AXH9		1	50.0394	0.0341844	50.039	6.9159	50.039	1	50.0394	0.0341844	50.039		3	H	NSRHRRISSPKRLLHHHAKHTNHLGDGQAYP	X;X;X;X;X;X;X;X;X;X;X;X;X;X;Histidine Methyl (H);Histidine Methyl (H);Histidine Methyl (H);X;X;X;X;X;X;X;X;X;X;X;X;X;X	XXXXXXXXXXXXPPPPPPPXXXXXXXXXXXX	LLH(1)H(1)H(1)AK	LLH(50.04)H(50.04)H(50.04)AK	4	2	-0.73741	0	0	14125	0	0	11409	0	0	25435	0	0	11889	0	0	10463	0	0	14268	0	0	8531.5	0	0	10737
C8VMG9	48	C8VMG9	C8VMG9		1	54.5979	0.0199114	54.598	20.504	54.598	1	54.5979	0.0199114	54.598		1	H	KTASEGEQSKEASKLHPTSEPRQTRPEAKTV	X;X;X;X;X;X;X;X;X;X;X;X;X;X;X;Histidine Methyl (H);X;X;X;X;X;X;Deamidation (NQ);Phospho (STY);X;X;X;X;X;X;X	XXXXXXXXXXXXXXPPPPPPPPPPPPPPPXX	LH(1)PTSEPRQTRPEAK	LH(54.6)PTSEPRQTRPEAK	2	3	0.12115	35829	0	0	31655	0	0	33259	0	0	41657	0	0	12692	0	0	16880	0	0	10819	0	0	13210	0	0
Q5AXH9	48	Q5AXH9	Q5AXH9		1	50.0394	0.0341844	50.039	6.9159	50.039	1	50.0394	0.0341844	50.039		3	H	SRHRRISSPKRLLHHHAKHTNHLGDGQAYPL	X;X;X;X;X;X;X;X;X;X;X;X;X;Histidine Methyl (H);Histidine Methyl (H);Histidine Methyl (H);X;X;X;X;X;X;X;X;X;X;X;X;X;X;X	XXXXXXXXXXXPPPPPPPXXXXXXXXXXXXX	LLH(1)H(1)H(1)AK	LLH(50.04)H(50.04)H(50.04)AK	5	2	-0.73741	0	0	14125	0	0	11409	0	0	25435	0	0	11889	0	0	10463	0	0	14268	0	0	8531.5	0	0	10737
C8VN22	50	C8VN22	C8VN22		1	83.6916	0.00261225	83.692	44.909	83.692	1	83.6916	0.00261225	83.692		1	H	AERHGYTRGVVKEIIHDAGRGAPLAKVQFRH	X;X;X;X;X;X;X;X;X;X;X;X;X;X;X;Histidine Methyl (H);X;X;X;X;X;X;X;X;X;X;X;X;X;X;X	XXXXXXXXXXXXPPPPPPPPPPPPPPXXXXX	EIIH(1)DAGRGAPLAK	EIIH(83.69)DAGRGAPLAK	4	4	-0.031698	62437	0	0	61675	0	0	63537	0	0	80712	0	0	43891	0	0	57663	0	0	34452	0	0	51046	0	0
Q5AZU9	59	Q5AZU9	Q5AZU9		1	81.6316	0.000411618	112.17	72.512	81.632	1	81.6316	0.000411618	112.17		1	H	DRKQSGYGGQTKPVFHKKAKTTKKVVLRLEC	X;X;X;Deamidation (NQ);X;X;X;X;X;X;X;X;X;X;X;Histidine Methyl (H);X;X;X;X;X;X;X;X;X;X;X;X;X;X;X	XXXPPPPPPPPPPPPPPXXXXXXXXXXXXXX	QSGYGGQTKPVFH(1)K	QSGYGGQTKPVFH(81.63)K	13	4	0.33066	215650	0	0	209670	0	0	288010	0	0	213920	0	0	175660	0	0	205200	0	0	86660	0	0	107520	0	0
C8VE95	64	C8VE95	C8VE95		1	49.9933	0.0357147	49.993	11.722	49.993	1	49.9933	0.0357147	49.993		1	H	NDGEMPRNSLFAQFSHFFVFRSNELKSPAGL	X;X;X;X;X;X;X;X;Phospho (STY);X;X;X;X;X;X;Histidine Methyl (H);X;X;X;X;X;X;Deamidation (NQ);X;X;X;X;X;X;X;X	XXXXXXXPPPPPPPPPPPPPPPPPPPXXXXX	NSLFAQFSH(1)FFVFRSNELK	NSLFAQFSH(49.99)FFVFRSNELK	9	3	4.1578	2887	0	0	3035.1	0	0	3850.1	0	0	4017.6	0	0	14852	0	0	20016	0	0	25259	0	0	22518	0	0
C8VBI2	68	C8VBI2	C8VBI2		1	56.5631	0.0157804	56.563	17.541	56.563	1	56.5631	0.0157804	56.563		1	H	CLASRAFFEPRYSLRHNSTATLKEHGFARRF	X;X;X;X;X;X;X;X;X;X;X;X;X;X;X;Histidine Methyl (H);Deamidation (NQ);Phospho (STY);X;X;Phospho (STY);X;X;X;X;X;X;X;X;X;X	XXXXXXXXXXXPPPPPPPPPPPPXXXXXXXX	YSLRH(1)NSTATLK	YSLRH(56.56)NSTATLK	5	2	-0.33248	21059	0	0	18807	0	0	7949.7	0	0	17647	0	0	7294.6	0	0	8429.1	0	0	3434.7	0	0	2774.1	0	0
Q5AUR1	71	Q5AUR1	Q5AUR1		1	45.8831	0.0269125	45.883	12.259	45.883	1	45.8831	0.0269125	45.883		2	H	WYFKRIRSGNPQDVQHSLHERFGDIARIGPN	X;X;X;X;X;X;X;Phospho (STY);X;X;X;X;X;X;Deamidation (NQ);Histidine Methyl (H);X;X;Histidine Methyl (H);X;X;X;X;X;X;X;X;X;X;X;X	XXXXPPPPPPPPPPPPPPPPPXXXXXXXXXX	RIRSGNPQDVQH(1)SLH(1)ER	RIRSGNPQDVQH(45.88)SLH(45.88)ER	12	3	-3.7375	0	9434.2	0	0	9412.4	0	0	24875	0	0	10771	0	0	5751.1	0	0	6583.8	0	0	6160.5	0	0	5871.9	0
Q5AUR1	74	Q5AUR1	Q5AUR1		1	45.8831	0.0269125	45.883	12.259	45.883	1	45.8831	0.0269125	45.883		2	H	KRIRSGNPQDVQHSLHERFGDIARIGPNILA	X;X;X;X;Phospho (STY);X;X;X;X;X;X;Deamidation (NQ);Histidine Methyl (H);X;X;Histidine Methyl (H);X;X;X;X;X;X;X;X;X;X;X;X;X;X;X	XPPPPPPPPPPPPPPPPPXXXXXXXXXXXXX	RIRSGNPQDVQH(1)SLH(1)ER	RIRSGNPQDVQH(45.88)SLH(45.88)ER	15	3	-3.7375	0	9434.2	0	0	9412.4	0	0	24875	0	0	10771	0	0	5751.1	0	0	6583.8	0	0	6160.5	0	0	5871.9	0
C8VFR5	78	C8VFR5	C8VFR5		1	68.1321	0.020378	68.132	28.552	68.132	1	68.1321	0.020378	68.132		1	H	YDIENATEKAANSPLHRSLRGRHLQMIAIGG	X;X;X;X;X;X;X;X;X;X;X;Deamidation (NQ);Phospho (STY);X;X;Histidine Methyl (H);X;X;X;X;X;X;X;X;X;X;X;X;X;X;X	XXXXXXXXXPPPPPPPPPPPXXXXXXXXXXX	AANSPLH(1)RSLR	AANSPLH(68.13)RSLR	7	3	1.6768	45772	0	0	7701.9	0	0	209210	0	0	17644	0	0	0	0	0	18283	0	0	3387.8	0	0	4685.2	0	0
C8VFS7	78	C8VFS7	C8VFS7		1	53.1701	0.0301691	53.17	6.1031	53.17	1	53.1701	0.0301691	53.17		2	H	KILAKRALREIKLLQHFRGHRNVCRISAFCI	X;X;X;X;X;X;X;X;X;X;X;X;X;X;X;Histidine Methyl (H);X;X;X;Histidine Methyl (H);X;X;X;X;X;X;X;X;X;X;X	XXXXXXXXXXXXPPPPPPPPPXXXXXXXXXX	LLQH(1)FRGH(1)R	LLQH(53.17)FRGH(53.17)R	4	2	-1.4456	0	3669.8	0	0	3030.3	0	0	4773.3	0	0	3996	0	0	4044.8	0	0	4655.6	0	0	2345.3	0	0	3199.2	0
Q5BDE5	78	Q5BDE5	Q5BDE5		1	56.2048	0.0220047	56.205	13.42	56.205	1	56.2048	0.0220047	56.205		1	H	LLETTRLIRAGQRSMHYMFQAVKFISILLKE	X;X;X;X;X;X;X;X;X;X;X;X;X;Phospho (STY);X;Histidine Methyl (H);Phospho (STY);X;X;Deamidation (NQ);X;X;X;X;X;X;X;X;X;X;X	XXXXXXXXXXXXXPPPPPPPPPPXXXXXXXX	SMH(1)YMFQAVK	SMH(56.2)YMFQAVK	3	3	-3.5439	8316.4	0	0	6292	0	0	7066.7	0	0	7345.2	0	0	4681.1	0	0	6125.5	0	0	4471	0	0	4834.4	0	0
C8V373	80	C8V373	C8V373		1	51.9267	0.0274735	51.927	26.541	51.927	1	51.9267	0.0274735	51.927		2	H	PQALREEKQARRTYDHFKHEAKVPGSGVEWT	X;X;X;X;X;X;X;X;X;X;X;X;X;X;X;Histidine Methyl (H);X;X;Histidine Methyl (H);X;X;X;X;X;X;X;X;X;X;X;X	XXXXXXXXXXXXPPPPPPPPPPXXXXXXXXX	TYDH(1)FKH(1)EAK	TYDH(51.93)FKH(51.93)EAK	4	5	-2.2113	0	2533.3	0	0	2727	0	0	6416.1	0	0	2471.5	0	0	2663.5	0	0	2643.8	0	0	2352.2	0	0	2096.2	0
C8VFS7	82	C8VFS7	C8VFS7		1	53.1701	0.0301691	53.17	6.1031	53.17	1	53.1701	0.0301691	53.17		2	H	KRALREIKLLQHFRGHRNVCRISAFCIRDK_	X;X;X;X;X;X;X;X;X;X;X;Histidine Methyl (H);X;X;X;Histidine Methyl (H);X;X;X;X;X;X;X;X;X;X;X;X;X;X;X	XXXXXXXXPPPPPPPPPXXXXXXXXXXXXXX	LLQH(1)FRGH(1)R	LLQH(53.17)FRGH(53.17)R	8	2	-1.4456	0	3669.8	0	0	3030.3	0	0	4773.3	0	0	3996	0	0	4044.8	0	0	4655.6	0	0	2345.3	0	0	3199.2	0
C8V373	83	C8V373	C8V373		1	51.9267	0.0274735	51.927	26.541	51.927	1	51.9267	0.0274735	51.927		2	H	LREEKQARRTYDHFKHEAKVPGSGVEWTEGI	X;X;X;X;X;X;X;X;X;X;X;X;Histidine Methyl (H);X;X;Histidine Methyl (H);X;X;X;X;X;X;X;X;X;X;X;X;X;X;X	XXXXXXXXXPPPPPPPPPPXXXXXXXXXXXX	TYDH(1)FKH(1)EAK	TYDH(51.93)FKH(51.93)EAK	7	5	-2.2113	0	2533.3	0	0	2727	0	0	6416.1	0	0	2471.5	0	0	2663.5	0	0	2643.8	0	0	2352.2	0	0	2096.2	0
C8VNU2	84	C8VNU2	C8VNU2		1	83.8618	0.00593923	83.862	28.548	83.862	1	83.8618	0.00593923	83.862		1	H	KLYVFGGRILSKTRPHLTSDIYELDLIRRHW	X;X;X;X;X;X;X;X;X;X;X;X;X;X;X;Histidine Methyl (H);X;X;Phospho (STY);X;X;X;X;X;X;X;X;X;X;X;X	XXXXXXXXXXXXXXPPPPPPPPPPPPPPPXX	PH(1)LTSDIYELDLIRR	PH(83.86)LTSDIYELDLIRR	2	2	3.5971	13065	0	0	10472	0	0	14465	0	0	17385	0	0	7063.8	0	0	14957	0	0	5121.6	0	0	7330.3	0	0
Q5AT37	84	Q5AT37	Q5AT37		0.998033	27.0541	0.0120748	65.347	27.871	65.347	0.998033	27.0541	0.0120748	65.347		1	H	SNLFSLTDQERRPVTHRSPPHEKDTLCQNAC	X;X;X;X;X;X;X;X;X;X;X;X;X;X;Phospho (STY);Histidine Methyl (H);X;Phospho (STY);X;X;X;X;X;X;X;X;X;X;X;X;X	XXXXXXXXXXXXPPPPPPPPPPPXXXXXXXX	PVTH(0.998)RSPPH(0.002)EK	PVTH(27.05)RSPPH(-27.05)EK	4	2	-0.22091	18907	0	0	18234	0	0	33067	0	0	35860	0	0	21567	0	0	38622	0	0	14023	0	0	17414	0	0
Q5BAW4	94	Q5BAW4	Q5BAW4		1	93.0983	0.00215472	93.098	14.582	93.098	1	93.0983	0.00215472	93.098		1	H	ADLWMQLRDRMKVDWHQMTLQEKKAAYWIAF	X;X;X;X;X;X;X;X;X;X;X;X;X;X;X;Histidine Methyl (H);Deamidation (NQ);Oxidation (M);X;X;X;X;X;X;X;X;X;X;X;X;X	XXXXXXXXXXXXPPPPPPPPPPPXXXXXXXX	VDWH(1)QMTLQEK	VDWH(93.1)QMTLQEK	4	2	0.76984	8261.9	0	0	7509.2	0	0	31470	0	0	15875	0	0	18160	0	0	45340	0	0	17317	0	0	10542	0	0
Q5BDT5	98	Q5BDT5	Q5BDT5		1	50.878	0.0427257	50.878	17.757	50.878	1	50.878	0.0427257	50.878		1	H	KCLVEELSIDHNKSNHEGLTARETIESDGSF	X;X;X;X;X;X;X;X;X;X;X;X;X;Phospho (STY);Deamidation (NQ);Histidine Methyl (H);X;X;X;Phospho (STY);X;X;X;X;X;X;X;X;X;X;X	XXXXXXXXXXXXXPPPPPPPPPXXXXXXXXX	SNH(1)EGLTAR	SNH(50.88)EGLTAR	3	2	-1.496	0	0	0	0	0	0	243.76	0	0	0	0	0	380.88	0	0	383.2	0	0	269.92	0	0	0	0	0
Q5B410	102	Q5B410	Q5B410		0.999938	45.362	0.0184103	61.56	17.135	61.56	0.999938	45.362	0.0184103	61.56		1	H	PPNKSTSPKSQHRTDHDTKQRIRRASTATVR	X;X;X;X;X;X;X;X;X;X;X;X;X;Phospho (STY);X;Histidine Methyl (H);X;X;X;Deamidation (NQ);X;X;X;X;X;X;X;X;X;X;X	XXXXXXXXXPPPPPPPPPPPPXXXXXXXXXX	SQHRTDH(1)DTKQR	SQH(-45.36)RTDH(45.36)DTKQR	7	2	1.704	5308.3	0	0	6852.9	0	0	7511.1	0	0	9262.8	0	0	2517.1	0	0	3161.2	0	0	1202.8	0	0	1690.8	0	0
C8VJW0	103	C8VJW0	C8VJW0		1	43.2463	0.0477589	43.246	11.115	43.246	1	43.2463	0.0477589	43.246		1	H	EDGSIVLRPPKRPSRHQQKTGPPVGAPLSSS	X;X;X;X;X;X;X;X;X;X;X;X;X;X;X;Histidine Methyl (H);X;X;X;X;X;X;X;X;X;X;X;X;X;X;X	XXXXXXXXXXXPPPPPPPPXXXXXXXXXXXX	RPSRH(1)QQK	RPSRH(43.25)QQK	5	3	-4.3738	0	0	0	0	0	0	0	0	0	0	0	0	0	0	0	0	0	0	0	0	0	0	0	0
Q5AQP8	104	Q5AQP8	Q5AQP8		1	94.8498	0.00213181	94.85	58.293	94.85	1	94.8498	0.00213181	94.85		1	H	RPLLTFRLLQVGWRIHRTRDLVLVFLYQLTY	X;X;X;X;X;X;X;X;X;X;X;X;X;X;X;Histidine Methyl (H);X;Phospho (STY);X;X;X;X;X;X;X;X;X;X;X;X;X	XXXXXXXPPPPPPPPPPPPXXXXXXXXXXXX	LLQVGWRIH(1)RTR	LLQVGWRIH(94.85)RTR	9	2	-2.9657	5071.4	0	0	5288.8	0	0	13158	0	0	7180	0	0	15914	0	0	29516	0	0	12474	0	0	14332	0	0
C8VSB2	108	C8VSB2	C8VSB2		0.998849	30.1202	0.0477467	42.475	29.668	42.475	0.998849	30.1202	0.0477467	42.475		1	H	SYGHHRQTSIVHGIQHSRNPSFAASTTSTSP	X;X;X;X;X;X;Deamidation (NQ);Phospho (STY);X;X;X;X;X;X;X;Histidine Methyl (H);X;X;X;X;X;X;X;X;X;X;X;X;X;X;X	XXXXXXPPPPPPPPPPPPXXXXXXXXXXXXX	QTSIVH(0.001)GIQH(0.999)SR	QTSIVH(-30.12)GIQH(30.12)SR	10	4	-1.1548	1863.8	0	0	2519.6	0	0	3206.4	0	0	1592.7	0	0	2158.9	0	0	2115	0	0	2104.8	0	0	1872.8	0	0
C8VNU1	112	C8VNU1	C8VNU1		1	48.5554	0.0163341	48.555	32.659	48.555	1	48.5554	0.0163341	48.555		1	H	KLTFPIISDPERKIAHQYDMVDYQDTTNVDS	X;X;X;X;X;X;X;X;X;X;X;X;X;X;X;Histidine Methyl (H);Deamidation (NQ);X;X;Oxidation (M);X;X;X;Deamidation (NQ);X;X;X;X;X;X;X	XXXXXXXXXXXXXPPPPPPPPPPPPPPPPPP	IAH(1)QYDMVDYQDTTNVDSK	IAH(48.56)QYDMVDYQDTTNVDSK	3	3	3.2681	3905.5	0	0	4986.1	0	0	6785.7	0	0	4994.4	0	0	2017.7	0	0	2117.9	0	0	2365.5	0	0	2151.6	0	0
Q5B4T4	112	Q5B4T4	Q5B4T4		0.999898	41.2823	0.0106679	53.448	24.683	53.448	0.999898	41.2823	0.0106679	53.448		1	H	SHAGRFTFSAADPGNHKICLTPETNAATGGW	X;X;X;X;X;X;Phospho (STY);X;X;X;X;X;X;X;Deamidation (NQ);Histidine Methyl (H);X;X;X;X;X;X;X;X;X;X;X;X;X;X;X	PPPPPPPPPPPPPPPPPXXXXXXXXXXXXXX	RDSHAGRFTFSAADPGNH(1)K	RDSH(-41.28)AGRFTFSAADPGNH(41.28)K	18	2	0.54793	403.94	0	0	582.44	0	0	1240.3	0	0	1283.4	0	0	2070.5	0	0	3660.2	0	0	4964.4	0	0	4937	0	0
Q5AXQ8	115	Q5AXQ8	Q5AXQ8		1	50.2837	0.00202525	116.77	78.68	50.284	1	50.2837	0.00202525	116.77		1	H	YKQGHCEKGRKCKFSHDLNVDRKAAKKDLYT	X;X;X;X;X;X;X;X;X;X;X;X;X;X;X;Histidine Methyl (H);X;X;X;X;X;X;X;X;X;X;X;X;X;X;X	XXXXXXXXXXXXXPPPPPPPPPPXXXXXXXX	FSH(1)DLNVDRK	FSH(50.28)DLNVDRK	3	4	0.29788	31739	0	0	26938	0	0	41735	0	0	23384	0	0	16859	0	0	21056	0	0	12664	0	0	11989	0	0
Q5BE21	115	Q5BE21	Q5BE21		1	53.9948	0.0202445	53.995	8.7379	53.995	1	53.9948	0.0202445	53.995		1	H	GADVNAKSITGQNALHFATSKANITTVRTLL	X;X;X;X;X;X;X;X;X;X;X;Deamidation (NQ);Deamidation (NQ);X;X;Histidine Methyl (H);X;X;Phospho (STY);X;X;X;X;X;X;X;X;X;X;X;X	XXXXXXXPPPPPPPPPPPPPPXXXXXXXXXX	SITGQNALH(1)FATSK	SITGQNALH(53.99)FATSK	9	3	3.5676	53928	0	0	49585	0	0	94339	0	0	46309	0	0	31458	0	0	28741	0	0	18993	0	0	13982	0	0
Q5AU09	117	Q5AU09	Q5AU09		1	41.202	0.0347018	41.202	15.245	41.202	1	41.202	0.0347018	41.202		1	H	GETNTILQTLIDQSAHREDTRKSRRPWSYLL	X;X;X;Deamidation (NQ);X;X;X;Deamidation (NQ);X;X;X;X;X;X;X;Histidine Methyl (H);X;X;X;X;X;X;X;X;X;X;X;X;X;X;X	PPPPPPPPPPPPPPPPPXXXXXXXXXXXXXX	IGETNTILQTLIDQSAH(1)R	IGETNTILQTLIDQSAH(41.2)R	17	4	-1.6878	10111	0	0	8603.9	0	0	14204	0	0	11917	0	0	6817.5	0	0	8454.6	0	0	5346	0	0	5605.4	0	0
Q5B9N2	119	Q5B9N2	Q5B9N2		0.99185	20.8172	0.0214713	50.145	18.506	50.145	0.99185	20.8172	0.0214713	50.145		2	H	SCTYEGCQKTFLRASHLNHHVKSAHTGVRDY	X;X;X;X;X;X;X;X;X;Phospho (STY);X;X;X;X;Phospho (STY);Histidine Methyl (H);X;X;Histidine Methyl (H);X;X;X;X;X;X;X;X;X;X;X;X	XXXXXXXXXPPPPPPPPPPPPPXXXXXXXXX	TFLRASH(0.992)LNH(0.992)H(0.016)VK	TFLRASH(20.82)LNH(20.82)H(-20.82)VK	7	3	3.2827	0	35467	0	0	36668	0	0	39303	0	0	41054	0	0	21732	0	0	24872	0	0	14495	0	0	16212	0
Q5BDG9	119	Q5BDG9	Q5BDG9		1	57.5984	0.0353138	57.598	38.327	57.598	1	57.5984	0.0353138	57.598		1	H	HHVQNSEESLEKKRRHYMDVVNAFERALALL	X;X;X;X;X;X;X;X;X;X;X;X;X;X;X;Histidine Methyl (H);X;Oxidation (M);X;X;X;Deamidation (NQ);X;X;X;X;X;X;X;X;X	XXXXXXXXXXXXXXXPPPPPPPPPPPXXXXX	H(1)YMDVVNAFER	H(57.6)YMDVVNAFER	1	2	-1.5026	664.36	0	0	646.09	0	0	862.39	0	0	321.79	0	0	476.62	0	0	501.38	0	0	354.43	0	0	258.31	0	0
Q5AQQ2	121	Q5AQQ2	Q5AQQ2		1	40.756	0.0352154	40.756	10.662	40.756	1	40.756	0.0352154	40.756		1	H	TNVFGPINVARAFLPHFRSQRSGTIVNIGSM	X;X;X;X;X;X;X;Deamidation (NQ);X;X;X;X;X;X;X;Histidine Methyl (H);X;X;X;X;X;X;X;X;X;X;X;X;X;X;X	PPPPPPPPPPPPPPPPPPPPPXXXXXXXXXX	TNVFGPINVARAFLPH(1)FRSQR	TNVFGPINVARAFLPH(40.76)FRSQR	16	3	-1.1345	3363.6	0	0	2272.4	0	0	4219.8	0	0	2764.2	0	0	118190	0	0	135680	0	0	44724	0	0	102220	0	0
Q5B9N2	122	Q5B9N2	Q5B9N2		0.99185	20.8172	0.0214713	50.145	18.506	50.145	0.99185	20.8172	0.0214713	50.145		2	H	YEGCQKTFLRASHLNHHVKSAHTGVRDYICD	X;X;X;X;X;X;Phospho (STY);X;X;X;X;Phospho (STY);Histidine Methyl (H);X;X;Histidine Methyl (H);X;X;X;X;X;X;X;X;X;X;X;X;X;X;X	XXXXXXPPPPPPPPPPPPPXXXXXXXXXXXX	TFLRASH(0.992)LNH(0.992)H(0.016)VK	TFLRASH(20.82)LNH(20.82)H(-20.82)VK	10	3	3.2827	0	35467	0	0	36668	0	0	39303	0	0	41054	0	0	21732	0	0	24872	0	0	14495	0	0	16212	0
C8VNX5	124	C8VNX5	C8VNX5		1	55.7239	0.0127803	55.724	40.848	55.724	1	55.7239	0.0127803	55.724		2	H	LILEINGEEIVRADPHVGLLHRGTEKLIEYK	X;X;X;X;X;X;X;X;X;X;X;X;X;X;X;Histidine Methyl (H);X;X;X;X;Histidine Methyl (H);X;X;X;X;X;X;X;X;X;X	XXXXXXXXXXXXPPPPPPPPPPPPPPXXXXX	ADPH(1)VGLLH(1)RGTEK	ADPH(55.72)VGLLH(55.72)RGTEK	4	4	0.87244	0	10054	0	0	10444	0	0	24166	0	0	12076	0	0	17406	0	0	21108	0	0	14045	0	0	20049	0
Q5BA19	126	Q5BA19	Q5BA19		1	51.013	0.0393109	51.013	17.052	51.013	1	51.013	0.0393109	51.013		1	H	TEHRELGLLFDPNKPHQPSFNTRAPRIKKLV	X;X;X;X;X;X;X;X;X;X;X;X;X;X;X;Histidine Methyl (H);Deamidation (NQ);X;X;X;Deamidation (NQ);X;X;X;X;X;X;X;X;X;X	XXXXXXXXXXXXXXPPPPPPPPPPPPXXXXX	PH(1)QPSFNTRAPR	PH(51.01)QPSFNTRAPR	2	4	3.0626	16303	0	0	12867	0	0	25183	0	0	16471	0	0	14407	0	0	18316	0	0	12798	0	0	13733	0	0
C8VNX5	129	C8VNX5	C8VNX5		1	55.7239	0.0127803	55.724	40.848	55.724	1	55.7239	0.0127803	55.724		2	H	NGEEIVRADPHVGLLHRGTEKLIEYKSYFQA	X;X;X;X;X;X;X;X;X;X;Histidine Methyl (H);X;X;X;X;Histidine Methyl (H);X;X;X;X;X;X;X;X;X;X;X;X;X;X;X	XXXXXXXPPPPPPPPPPPPPPXXXXXXXXXX	ADPH(1)VGLLH(1)RGTEK	ADPH(55.72)VGLLH(55.72)RGTEK	9	4	0.87244	0	10054	0	0	10444	0	0	24166	0	0	12076	0	0	17406	0	0	21108	0	0	14045	0	0	20049	0
Q5B1K9	129	Q5B1K9	Q5B1K9		1	102.776	1.10085e-18	102.78	84.506	102.78	1	102.776	1.10085e-18	102.78		1	H	FQPPPTLVPTPTGGVHQEMPGAGLGLSQGTD	X;X;X;X;X;X;X;X;X;X;X;X;X;X;X;Histidine Methyl (H);Deamidation (NQ);X;X;X;X;X;X;X;X;X;X;X;X;X;X	PPPPPPPPPPPPPPPPPPPPPPPPPPPPPPP	MPISQAFQPPPTLVPTPTGGVH(1)QEMPGAGLGLSQGTDVTK	MPISQAFQPPPTLVPTPTGGVH(102.78)QEMPGAGLGLSQGTDVTK	22	4	-2.4824	2591.4	0	0	2288.5	0	0	2673	0	0	1959.1	0	0	713.49	0	0	575.34	0	0	1838.5	0	0	530.35	0	0
C8VEZ2	130	C8VEZ2	C8VEZ2		1	53.1664	0.0229077	53.166	35.435	53.166	1	53.1664	0.0229077	53.166		1	H	ETSPMRLRMEKLIKDHQQKIVEELSRIDGKQ	X;X;X;X;Oxidation (M);X;X;X;X;X;X;X;X;X;X;Histidine Methyl (H);X;X;X;X;X;X;X;X;X;X;X;X;X;X;X	XXXXXXXXXXXPPPPPPPPXXXXXXXXXXXX	LIKDH(1)QQK	LIKDH(53.17)QQK	5	3	2.6115	0	0	0	0	0	0	0	0	0	0	0	0	0	0	0	0	0	0	0	0	0	0	0	0
Q5BGM8	130	Q5BGM8	Q5BGM8		1	46.4619	0.0418413	46.462	10.503	46.462	1	46.4619	0.0418413	46.462		1	H	RFRPQSEHPRLSAVSHLASEKNYSGDEDETP	X;X;X;X;X;X;X;X;X;X;X;X;X;X;Phospho (STY);Histidine Methyl (H);X;X;Phospho (STY);X;X;X;X;X;X;X;X;X;X;X;X	XXXXXXXXXXPPPPPPPPPPPXXXXXXXXXX	LSAVSH(1)LASEK	LSAVSH(46.46)LASEK	6	2	1.6876	18885	0	0	17060	0	0	19503	0	0	12839	0	0	2985	0	0	3075.4	0	0	1811.1	0	0	1100	0	0
C8VP08	131	C8VP08	C8VP08		0.5	0	0.0430311	41.088	11.322	41.088	0.5	0	0.0430311	41.088		1	H	LQGAIKITIYASTRRHLHLDWMRRLALRIIP	X;X;X;X;X;X;X;X;X;X;X;Phospho (STY);X;X;X;Histidine Methyl (H);X;X;X;X;X;Oxidation (M);X;X;X;X;X;X;X;X;X	XXXXXXPPPPPPPPPPPPPPPPPXXXXXXXX	ITIYASTRRH(0.5)LH(0.5)LDWMR	ITIYASTRRH(0)LH(0)LDWMR	10	3	-2.5346	9677.1	0	0	8615.5	0	0	10737	0	0	11942	0	0	7182.6	0	0	8877.5	0	0	5534.3	0	0	6780.3	0	0
C8VP08	133	C8VP08	C8VP08		0.5	0	0.0430311	41.088	11.322	41.088	0.5	0	0.0430311	41.088		1	H	GAIKITIYASTRRHLHLDWMRRLALRIIPIL	X;X;X;X;X;X;X;X;X;X;X;X;X;X;X;X;X;X;X;X;X;X;X;X;X;X;X;X;X;X;X	XXXXXXXXXXXXXXXXXXXXXXXXXXXXXXX	ITIYASTRRH(0.5)LH(0.5)LDWMR	ITIYASTRRH(0)LH(0)LDWMR	12	3	-2.5346	9677.1	0	0	8615.5	0	0	10737	0	0	11942	0	0	7182.6	0	0	8877.5	0	0	5534.3	0	0	6780.3	0	0
Q5BB82	134	Q5BB82	Q5BB82		1	45.9965	0.0373666	45.997	13.988	45.997	1	45.9965	0.0373666	45.997		1	H	RHAVNNAGRKLTVNEHGKLDDEVSVISSETN	X;X;X;X;X;X;X;X;X;X;X;Phospho (STY);X;Deamidation (NQ);X;Histidine Methyl (H);X;X;X;X;X;X;X;X;X;X;X;X;X;X;X	XXXXXXXXXPPPPPPPPPXXXXXXXXXXXXX	KLTVNEH(1)GK	KLTVNEH(46)GK	7	3	1.8667	22644	0	0	19509	0	0	38612	0	0	24896	0	0	35804	0	0	31360	0	0	20603	0	0	57551	0	0
C8VI22	136	C8VI22	C8VI22		1	50.6753	0.0424461	50.675	17.266	50.675	1	50.6753	0.0424461	50.675		1	H	PHGVDENYAGLDKAMHQVQGDPDSVLDPMLK	X;X;X;X;X;X;X;X;X;X;X;X;X;X;X;Histidine Methyl (H);Deamidation (NQ);X;X;X;X;X;X;Phospho (STY);X;X;X;X;Oxidation (M);X;X	XXXXXXXXXXXXXPPPPPPPPPPPPPPPPPP	AMH(1)QVQGDPDSVLDPMLK	AMH(50.68)QVQGDPDSVLDPMLK	3	2	-0.13812	6297.2	0	0	4490.2	0	0	2981.4	0	0	9046.9	0	0	5680.8	0	0	11478	0	0	4059.6	0	0	3499.6	0	0
Q5B6R2	140	Q5B6R2	Q5B6R2		1	46.6209	0.019746	46.621	23.483	46.621	1	46.6209	0.019746	46.621		2	H	TAYESLLRDIVSRSDHDHRQTIHDAIRHHFQ	X;X;X;X;Phospho (STY);X;X;X;X;X;X;X;X;X;X;Histidine Methyl (H);X;Histidine Methyl (H);X;X;X;X;X;X;X;X;X;X;X;X;X	PPPPPPPPPPPPPPPPPPPXXXXXXXXXXXX	LTAYESLLRDIVSRSDH(1)DH(1)R	LTAYESLLRDIVSRSDH(46.62)DH(46.62)R	17	4	-1.7064	0	6961.3	0	0	7598.6	0	0	8588.9	0	0	10780	0	0	3722.2	0	0	7373.1	0	0	2512.5	0	0	4600.6	0
Q5B3B7	141	Q5B3B7	Q5B3B7		1	79.474	0.0508023	79.474	23.576	79.474	1	79.474	0.0508023	79.474		1	H	QNGIERIHKTKMQQTHTVNKDCLRIKGYLAQ	X;X;X;X;X;X;X;X;X;X;X;X;Deamidation (NQ);X;X;Histidine Methyl (H);X;X;X;X;X;X;X;X;X;X;X;X;X;X;X	XXXXXXXXXXXPPPPPPPPPXXXXXXXXXXX	MQQTH(1)TVNK	MQQTH(79.47)TVNK	5	2	4.118	9530	0	0	8877.7	0	0	23786	0	0	18324	0	0	27863	0	0	102210	0	0	10531	0	0	7227.7	0	0
C8VIG8	142	C8VIG8	C8VIG8		0.5	0	0.0435473	49.5	8.9809	49.5	0.5	0	0.0435473	49.5		1	H	LSDSFRDAYGKTLKQHHSFMIKPIFSAAMSA	X;X;X;X;X;X;X;X;X;X;X;Phospho (STY);X;X;Deamidation (NQ);Histidine Methyl (H);X;X;X;X;X;X;X;X;X;X;X;X;Oxidation (M);X;X	XXXXXXXXXXXPPPPPPPPPPPXXXXXXXXX	TLKQH(0.5)H(0.5)SFMIK	TLKQH(0)H(0)SFMIK	5	3	3.0845	20762	0	0	18060	0	0	42279	0	0	14660	0	0	12810	0	0	14081	0	0	11661	0	0	12764	0	0
Q5B6R2	142	Q5B6R2	Q5B6R2		1	46.6209	0.019746	46.621	23.483	46.621	1	46.6209	0.019746	46.621		2	H	YESLLRDIVSRSDHDHRQTIHDAIRHHFQAS	X;X;Phospho (STY);X;X;X;X;X;X;X;X;X;X;Histidine Methyl (H);X;Histidine Methyl (H);X;X;X;X;X;X;X;X;X;X;X;X;X;X;X	PPPPPPPPPPPPPPPPPXXXXXXXXXXXXXX	LTAYESLLRDIVSRSDH(1)DH(1)R	LTAYESLLRDIVSRSDH(46.62)DH(46.62)R	19	4	-1.7064	0	6961.3	0	0	7598.6	0	0	8588.9	0	0	10780	0	0	3722.2	0	0	7373.1	0	0	2512.5	0	0	4600.6	0
C8VHR2	143	C8VHR2	C8VHR2		1	47.743	0.0392369	47.743	12.919	47.743	1	47.743	0.0392369	47.743		2	H	DALPNPSIKGKSKAVHRHPSRVGEHESETPY	X;X;X;X;X;X;X;X;X;X;X;X;X;X;X;Histidine Methyl (H);X;Histidine Methyl (H);X;X;X;X;X;X;X;X;X;X;X;X;X	XXXXXXXXXXXXXPPPPPPPPXXXXXXXXXX	AVH(1)RH(1)PSR	AVH(47.74)RH(47.74)PSR	3	2	-1.18	0	9363.2	0	0	7860.4	0	0	16676	0	0	14702	0	0	30293	0	0	37906	0	0	28036	0	0	27281	0
C8VIG8	143	C8VIG8	C8VIG8		0.5	0	0.0435473	49.5	8.9809	49.5	0.5	0	0.0435473	49.5		1	H	SDSFRDAYGKTLKQHHSFMIKPIFSAAMSAT	X;X;X;X;X;X;X;X;X;X;X;X;X;X;X;X;X;X;X;X;X;X;X;X;X;X;X;Oxidation (M);X;X;X	XXXXXXXXXXXXXXXXXXXXXXXXXXXXXXX	TLKQH(0.5)H(0.5)SFMIK	TLKQH(0)H(0)SFMIK	6	3	3.0845	20762	0	0	18060	0	0	42279	0	0	14660	0	0	12810	0	0	14081	0	0	11661	0	0	12764	0	0
C8VHR2	145	C8VHR2	C8VHR2		1	47.743	0.0392369	47.743	12.919	47.743	1	47.743	0.0392369	47.743		2	H	LPNPSIKGKSKAVHRHPSRVGEHESETPYED	X;X;X;X;X;X;X;X;X;X;X;X;X;Histidine Methyl (H);X;Histidine Methyl (H);X;X;X;X;X;X;X;X;X;X;X;X;X;X;X	XXXXXXXXXXXPPPPPPPPXXXXXXXXXXXX	AVH(1)RH(1)PSR	AVH(47.74)RH(47.74)PSR	5	2	-1.18	0	9363.2	0	0	7860.4	0	0	16676	0	0	14702	0	0	30293	0	0	37906	0	0	28036	0	0	27281	0
Q5BDK5	145	Q5BDK5	Q5BDK5		1	91.8667	0.00829665	91.867	28.651	91.867	1	91.8667	0.00829665	91.867		1	H	SHPSLSHAYTSKALSHMTQAIEAKLRQERAL	X;X;X;X;X;X;X;X;X;X;X;X;X;X;X;Histidine Methyl (H);X;Phospho (STY);Deamidation (NQ);X;X;X;X;X;X;X;X;X;X;X;X	XXXXXXXXXXXXPPPPPPPPPPPPXXXXXXX	ALSH(1)MTQAIEAK	ALSH(91.87)MTQAIEAK	4	2	3.0095	5240.7	0	0	3892.4	0	0	5609.4	0	0	29203	0	0	50503	0	0	51601	0	0	29207	0	0	34237	0	0
C8VFN0	146	C8VFN0	C8VFN0		1	47.2606	0.0400448	47.261	19.64	47.261	1	47.2606	0.0400448	47.261		2	H	RQTICQTSRYKDDLGHIRDMHRLLLYKGYVF	X;X;X;X;X;X;X;X;X;X;X;X;X;X;X;Histidine Methyl (H);X;X;X;X;Histidine Methyl (H);X;X;X;X;X;X;X;X;X;X	XXXXXXXXXXXPPPPPPPPPPPXXXXXXXXX	DDLGH(1)IRDMH(1)R	DDLGH(47.26)IRDMH(47.26)R	5	2	-1.6528	0	26204	0	0	21721	0	0	33056	0	0	19553	0	0	13992	0	0	16048	0	0	12990	0	0	14129	0
C8VBL4	148	C8VBL4	C8VBL4		1	46.6804	0.0488962	46.68	42.132	46.68	1	46.6804	0.0488962	46.68		1	H	LRGRGYASRLFKELSHILPQWQAGEVEKPRG	X;X;X;X;X;X;X;X;X;X;X;X;X;X;Phospho (STY);Histidine Methyl (H);X;X;X;Deamidation (NQ);X;X;X;X;X;X;X;X;X;X;X	XXXXXXXXXXXXPPPPPPPPPPPPPPPPXXX	ELSH(1)ILPQWQAGEVEK	ELSH(46.68)ILPQWQAGEVEK	4	3	-3.3842	3613.8	0	0	3207.2	0	0	2777	0	0	2711.1	0	0	1543.6	0	0	2210.8	0	0	1092.8	0	0	1471.4	0	0
Q5BGW0	148	Q5BGW0	Q5BGW0		0.494441	0	0.0164252	62.203	16.339	62.203	0.494441	0	0.0164252	62.203			H	TSSHLVKVLHSLGSHHHSLTNLKPGETTIPT	X;X;X;X;X;X;X;X;X;X;Phospho (STY);X;X;Phospho (STY);X;Histidine Methyl (H);X;X;X;X;X;X;X;X;X;X;X;X;X;X;X	XXXXXXXPPPPPPPPPPPPPPPPXXXXXXXX	VLH(0.007)SLGSH(0.006)H(0.494)H(0.493)SLTNLK	VLH(-20.82)SLGSH(-20.82)H(0)H(0)SLTNLK	9	3	2.214	0	0	0	0	0	0	0	0	0	0	0	0	0	0	0	0	0	0	0	0	0	0	0	0
C8VJS5	149	C8VJS5	C8VJS5		1	41.7043	0.0405011	41.704	18.332	41.704	1	41.7043	0.0405011	41.704		2	H	HIVDETQAFADILREHFHMNDIFKMEDLVAR	X;X;X;X;X;X;X;X;X;X;X;X;X;X;X;Histidine Methyl (H);X;Histidine Methyl (H);Oxidation (M);X;X;X;X;X;X;X;X;X;X;X;X	XXXXXXXXXXXXXXPPPPPPPPPPXXXXXXX	EH(1)FH(1)MNDIFK	EH(41.7)FH(41.7)MNDIFK	2	3	-4.1541	0	1897.1	0	0	1903.6	0	0	2535.4	0	0	2398.8	0	0	21168	0	0	31029	0	0	11927	0	0	37551	0
Q5ARR9	149	Q5ARR9	Q5ARR9		1	60.1571	0.00103646	90.926	32.439	60.157	1	60.1571	0.00103646	90.926		1	H	DEGWSAANMKAYMRKHQAQPVNPESKAAASP	X;X;X;X;X;X;X;X;X;X;X;X;X;X;X;Histidine Methyl (H);Deamidation (NQ);X;Deamidation (NQ);X;X;X;X;X;X;X;X;X;X;X;X	XXXXXXXXXXXXXXPPPPPPPPPPPPXXXXX	KH(1)QAQPVNPESK	KH(60.16)QAQPVNPESK	2	3	-1.0008	8353.4	0	0	9088.2	0	0	23497	0	0	8059	0	0	42744	0	0	50311	0	0	21282	0	0	36570	0	0
Q5BGW0	149	Q5BGW0	Q5BGW0		0.492644	0	0.0164252	62.203	16.339	62.203	0.492644	0	0.0164252	62.203			H	SSHLVKVLHSLGSHHHSLTNLKPGETTIPTP	X;X;X;X;X;X;X;X;X;X;X;X;X;X;X;X;X;X;X;X;X;X;X;X;X;X;X;X;X;X;X	XXXXXXXXXXXXXXXXXXXXXXXXXXXXXXX	VLH(0.007)SLGSH(0.006)H(0.494)H(0.493)SLTNLK	VLH(-20.82)SLGSH(-20.82)H(0)H(0)SLTNLK	10	3	2.214	0	0	0	0	0	0	0	0	0	0	0	0	0	0	0	0	0	0	0	0	0	0	0	0
C8VFN0	151	C8VFN0	C8VFN0		1	47.2606	0.0400448	47.261	19.64	47.261	1	47.2606	0.0400448	47.261		2	H	QTSRYKDDLGHIRDMHRLLLYKGYVFPEIRR	X;X;X;X;X;X;X;X;X;X;Histidine Methyl (H);X;X;X;X;Histidine Methyl (H);X;X;X;X;X;X;X;X;X;X;X;X;X;X;X	XXXXXXPPPPPPPPPPPXXXXXXXXXXXXXX	DDLGH(1)IRDMH(1)R	DDLGH(47.26)IRDMH(47.26)R	10	2	-1.6528	0	26204	0	0	21721	0	0	33056	0	0	19553	0	0	13992	0	0	16048	0	0	12990	0	0	14129	0
C8VJS5	151	C8VJS5	C8VJS5		1	41.7043	0.0405011	41.704	18.332	41.704	1	41.7043	0.0405011	41.704		2	H	VDETQAFADILREHFHMNDIFKMEDLVARMI	X;X;X;X;X;X;X;X;X;X;X;X;X;Histidine Methyl (H);X;Histidine Methyl (H);Oxidation (M);X;X;X;X;X;X;X;X;X;X;X;X;X;X	XXXXXXXXXXXXPPPPPPPPPPXXXXXXXXX	EH(1)FH(1)MNDIFK	EH(41.7)FH(41.7)MNDIFK	4	3	-4.1541	0	1897.1	0	0	1903.6	0	0	2535.4	0	0	2398.8	0	0	21168	0	0	31029	0	0	11927	0	0	37551	0
Q5BDZ8	155	Q5BDZ8	Q5BDZ8		1	54.2594	0.00269709	54.259	42.948	54.259	1	54.2594	0.00269709	54.259		1	H	TVVVDPALEAEGFQGHPTQSDQMDEDVKIPV	X;X;X;X;X;X;X;X;X;X;X;X;X;Deamidation (NQ);X;Histidine Methyl (H);X;X;Deamidation (NQ);X;X;X;X;X;X;X;X;X;X;X;X	PPPPPPPPPPPPPPPPPPPPPPPPPPPPXXX	TVVVDPALEAEGFQGH(1)PTQSDQMDEDVK	TVVVDPALEAEGFQGH(54.26)PTQSDQMDEDVK	16	4	2.6616	1665.9	0	0	1277.9	0	0	2218.1	0	0	1486.6	0	0	1540.9	0	0	1905.7	0	0	1060.9	0	0	1387.5	0	0
Q5BA31	160	Q5BA31	Q5BA31		1	68.3984	0.0413167	68.398	19.638	68.398	1	68.3984	0.0413167	68.398		1	H	EVSVEQAEGSARRLLHLLQRAERFEDASDVA	X;X;X;X;X;X;X;X;X;X;X;X;X;X;X;Histidine Methyl (H);X;X;X;X;X;X;X;X;X;X;X;X;X;X;X	XXXXXXXXXXXXXPPPPPPPXXXXXXXXXXX	LLH(1)LLQR	LLH(68.4)LLQR	3	3	2.0314	0	0	0	0	0	0	0	0	0	0	0	0	0	0	0	0	0	0	0	0	0	0	0	0
Q5B2Y5	161	Q5B2Y5	Q5B2Y5		1	53.7511	0.038235	53.751	18.483	53.751	1	53.7511	0.038235	53.751		1	H	YKICIAKGQEWMTAFHMRYGLFEWLVTPFGL	X;X;X;X;X;X;X;X;Deamidation (NQ);X;X;Oxidation (M);X;X;X;Histidine Methyl (H);X;X;X;X;X;X;X;X;X;X;X;X;X;X;X	XXXXXXXPPPPPPPPPPPXXXXXXXXXXXXX	GQEWMTAFH(1)MR	GQEWMTAFH(53.75)MR	9	2	-2.2143	747.67	0	0	463.41	0	0	2352.1	0	0	1388.7	0	0	3481.9	0	0	6033.3	0	0	3544.5	0	0	3227.6	0	0
Q5B1I5	162	Q5B1I5	Q5B1I5		1	62.4662	0.034772	62.466	14.863	62.466	1	62.4662	0.034772	62.466		1	H	GRNEPNTDKTNEELVHINRKCEELSMDIWYS	X;X;X;X;X;X;X;X;X;X;X;X;X;X;X;Histidine Methyl (H);X;X;X;X;X;X;X;X;X;X;X;X;X;X;X	XXXXXXXXXPPPPPPPPPPPXXXXXXXXXXX	TNEELVH(1)INRK	TNEELVH(62.47)INRK	7	3	-0.22895	16729	0	0	19417	0	0	23141	0	0	23449	0	0	15533	0	0	27071	0	0	9879.7	0	0	19461	0	0
C8VU15	163	C8VU15	C8VU15		1	64.3739	0.0442732	64.374	22.498	64.374	1	64.3739	0.0442732	64.374		1	H	APLRTDFDKYIKGMQHVESANVTKQSDADKI	X;X;X;X;X;X;X;X;X;X;X;X;X;X;X;Histidine Methyl (H);X;X;X;X;Deamidation (NQ);X;Phospho (STY);X;X;X;X;X;X;X;X	XXXXXXXXXXXXPPPPPPPPPPPPXXXXXXX	GMQH(1)VESANVTK	GMQH(64.37)VESANVTK	4	2	-0.85173	12944	0	0	8231.7	0	0	18237	0	0	8977.6	0	0	5277.4	0	0	4733.4	0	0	2954	0	0	2938.8	0	0
Q5B9R3	164	Q5B9R3	Q5B9R3		1	51.1346	0.0203375	51.135	14.814	51.135	1	51.1346	0.0203375	51.135		1	H	QQYDSIIFRKRNITVHLGNTPRIKIPLNTIY	X;X;X;X;X;X;X;X;X;X;X;Deamidation (NQ);X;X;X;Histidine Methyl (H);X;X;Deamidation (NQ);Phospho (STY);X;X;X;X;X;X;X;X;X;X;X	XXXXXXXXXXXPPPPPPPPPPPPPXXXXXXX	NITVH(1)LGNTPRIK	NITVH(51.13)LGNTPRIK	5	3	-2.0309	76603	0	0	47422	0	0	69099	0	0	63222	0	0	45038	0	0	47314	0	0	23670	0	0	34154	0	0
Q5BDJ4	176	Q5BDJ4	Q5BDJ4		1	54.4709	0.0437074	54.471	14.686	54.471	1	54.4709	0.0437074	54.471		1	H	EAEKRRLLYQQTPRRHRTSSSTLEEKRKVTM	X;X;X;X;X;X;X;X;X;X;X;X;X;X;X;Histidine Methyl (H);X;Phospho (STY);Phospho (STY);X;X;X;X;X;X;X;X;X;X;X;X	XXXXXXXXXXXXXXXPPPPPPPPPPPXXXXX	H(1)RTSSSTLEEK	H(54.47)RTSSSTLEEK	1	3	-1.2411	17727	0	0	14477	0	0	31240	0	0	26636	0	0	40018	0	0	68850	0	0	33930	0	0	24195	0	0
Q5BDU7	176	Q5BDU7	Q5BDU7		1	90.827	0.00384437	90.827	21.551	90.827	1	90.827	0.00384437	90.827		1	H	QQLARLSADEEASSIHDVSIRFRMAIKIESG	X;X;X;X;X;X;X;X;X;X;X;X;X;X;X;Histidine Methyl (H);X;X;X;X;X;X;X;X;X;X;X;X;X;X;X	XXXXXPPPPPPPPPPPPPPPPXXXXXXXXXX	LSADEEASSIH(1)DVSIR	LSADEEASSIH(90.83)DVSIR	11	2	0.10044	15484	0	0	19120	0	0	27151	0	0	12022	0	0	1366.3	0	0	4087	0	0	1773	0	0	1457.4	0	0
Q5AQI2	186	Q5AQI2	Q5AQI2		1	70.2351	0.000881052	70.235	30.884	70.235	1	70.2351	0.000881052	70.235		1	H	GYSSGAFSRQQSADRHKSQSANIPFSDRIPP	X;X;X;X;X;X;X;X;X;Deamidation (NQ);X;X;X;X;X;Histidine Methyl (H);X;Phospho (STY);Deamidation (NQ);X;X;X;X;X;X;X;X;X;X;X;X	XXXXXXXXXPPPPPPPPPPPPPPPPPPPXXX	QQSADRH(1)KSQSANIPFSDR	QQSADRH(70.24)KSQSANIPFSDR	7	3	0.872	62893	0	0	68116	0	0	114920	0	0	60787	0	0	103390	0	0	84399	0	0	82292	0	0	119110	0	0
C8VSL2	187	C8VSL2	C8VSL2		1	53.8685	0.0179924	53.869	27.886	53.869	1	53.8685	0.0179924	53.869		1	H	VEGDELRAYQKEWNSHSLDGLPSLRTALQDK	X;X;X;X;X;X;X;X;X;X;X;X;X;X;X;Histidine Methyl (H);X;X;X;X;X;X;Phospho (STY);X;X;X;X;X;X;X;X	XXXXXXXXXXXPPPPPPPPPPPPPPXXXXXX	EWNSH(1)SLDGLPSLR	EWNSH(53.87)SLDGLPSLR	5	4	-2.4764	7788	0	0	6627.8	0	0	14438	0	0	7873.8	0	0	3614.6	0	0	4675.2	0	0	3355.8	0	0	3122.1	0	0
Q5BBE4	189	Q5BBE4	Q5BBE4		1	50.9502	0.0307178	50.95	19.952	50.95	1	50.9502	0.0307178	50.95		1	H	RSVSPSGKSRRSASQHKQQSRPGLKSRGSST	X;X;X;X;X;X;X;X;X;X;X;X;X;X;Deamidation (NQ);Histidine Methyl (H);X;Deamidation (NQ);Deamidation (NQ);X;X;X;X;X;X;X;X;X;X;X;X	XXXXXXXXXXPPPPPPPPPPPXXXXXXXXXX	RSASQH(1)KQQSR	RSASQH(50.95)KQQSR	6	3	1.3507	13511	0	0	13367	0	0	38201	0	0	17416	0	0	10067	0	0	11988	0	0	9091.8	0	0	8763.9	0	0
Q5BDC9	191	Q5BDC9	Q5BDC9		1	44.4995	0.0331467	44.5	28.734	44.5	1	44.4995	0.0331467	44.5		1	H	SAINGKMNPTDMRPQHFGPNDPLLLPRNNAL	X;X;X;X;X;X;X;Deamidation (NQ);X;X;X;Oxidation (M);X;X;Deamidation (NQ);Histidine Methyl (H);X;X;X;X;X;X;X;X;X;X;X;X;X;X;X	XXXXXXPPPPPPPPPPPPPPPPPPPPPXXXX	MNPTDMRPQH(1)FGPNDPLLLPR	MNPTDMRPQH(44.5)FGPNDPLLLPR	10	4	3.2953	31925	0	0	25628	0	0	41191	0	0	41802	0	0	36724	0	0	45969	0	0	29243	0	0	30655	0	0
Q5BH21	195	Q5BH21	Q5BH21		1	42.0009	0.0463918	42.001	25.061	42.001	1	42.0009	0.0463918	42.001		2	H	RKIPEVAQKRQMAPSHSSSLHRGSEPHRTDL	X;X;X;X;X;X;X;X;X;X;X;X;X;X;Phospho (STY);Histidine Methyl (H);X;X;Phospho (STY);X;Histidine Methyl (H);X;X;X;X;X;X;X;X;X;X	XXXXXXXXXXPPPPPPPPPPPPXXXXXXXXX	QMAPSH(1)SSSLH(1)R	QMAPSH(42)SSSLH(42)R	6	2	3.8452	0	4083.7	0	0	5474.5	0	0	5346.7	0	0	4577.5	0	0	4488.8	0	0	4152.7	0	0	3403.6	0	0	3421.5	0
Q5ATI9	199	Q5ATI9	Q5ATI9		1	76.2278	0.0241714	76.228	52.006	76.228	1	76.2278	0.0241714	76.228		1	H	ALLGPTASKIYAAGFHIEPRGPEVEKLIHIL	X;X;X;X;X;X;X;X;X;X;X;X;X;X;X;Histidine Methyl (H);X;X;X;X;X;X;X;X;X;X;X;X;X;X;X	XXXXXXXXXPPPPPPPPPPPXXXXXXXXXXX	IYAAGFH(1)IEPR	IYAAGFH(76.23)IEPR	7	3	3.9924	20628	0	0	16608	0	0	25477	0	0	16073	0	0	13210	0	0	18071	0	0	8866.9	0	0	10845	0	0
Q5BH21	200	Q5BH21	Q5BH21		1	42.0009	0.0463918	42.001	25.061	42.001	1	42.0009	0.0463918	42.001		2	H	VAQKRQMAPSHSSSLHRGSEPHRTDLPSRFT	X;X;X;X;X;X;X;X;X;Phospho (STY);Histidine Methyl (H);X;X;Phospho (STY);X;Histidine Methyl (H);X;X;X;X;X;X;X;X;X;X;X;X;X;X;X	XXXXXPPPPPPPPPPPPXXXXXXXXXXXXXX	QMAPSH(1)SSSLH(1)R	QMAPSH(42)SSSLH(42)R	11	2	3.8452	0	4083.7	0	0	5474.5	0	0	5346.7	0	0	4577.5	0	0	4488.8	0	0	4152.7	0	0	3403.6	0	0	3421.5	0
Q5B578	201	Q5B578	Q5B578		1	88.283	9.43992e-05	88.283	71.205	88.283	1	88.283	9.43992e-05	88.283		1	H	ARRASSATEIGLPMQHSDPSDLKNMAGSAAS	X;X;X;X;X;X;X;X;X;X;X;X;X;X;Deamidation (NQ);Histidine Methyl (H);X;X;X;X;X;X;X;X;X;X;X;X;X;X;X	XXXPPPPPPPPPPPPPPPPPPPPXXXXXXXX	ASSATEIGLPMQH(1)SDPSDLK	ASSATEIGLPMQH(88.28)SDPSDLK	13	3	-2.1721	13151	0	0	11433	0	0	18602	0	0	14937	0	0	9962.2	0	0	11515	0	0	6299.2	0	0	6699.8	0	0
C8VET1	209	C8VET1	C8VET1		1	45.1367	0.0319649	47.198	31.932	45.137	1	45.1367	0.0319649	47.198		2	H	GADVNYRDAEGKTAIHHAVQAERSGMAEL__	X;X;X;X;X;X;X;X;X;X;X;X;Phospho (STY);X;X;Histidine Methyl (H);Histidine Methyl (H);X;X;Deamidation (NQ);X;X;X;X;X;X;X;X;X;X;X	XXXXXXXXXXXXPPPPPPPPPPPXXXXXXXX	TAIH(1)H(1)AVQAER	TAIH(45.14)H(45.14)AVQAER	4	2	-3.0822	0	4418.9	0	0	4648.1	0	0	6348.5	0	0	4796.7	0	0	4839.6	0	0	5806.3	0	0	3970.6	0	0	4028.8	0
Q5B5D6	209	Q5B5D6	Q5B5D6		1	75.8543	0.0398102	75.854	35.282	75.854	1	75.8543	0.0398102	75.854		1	H	AAEDLRMKILEQRRQHAQQQAR_________	X;X;X;X;X;X;X;X;X;X;X;X;X;X;Deamidation (NQ);Histidine Methyl (H);X;X;X;X;X;X;X;X;X;X;X;X;X;X;X	XXXXXXXXXXXXXXPPPPPPPPXXXXXXXXX	QH(1)AQQQAR	QH(75.85)AQQQAR	2	3	-0.071186	6631	0	0	4023	0	0	9030.7	0	0	7408.6	0	0	3199.3	0	0	5654	0	0	2717.6	0	0	2823.8	0	0
C8VET1	210	C8VET1	C8VET1		1	45.1367	0.0319649	47.198	31.932	45.137	1	45.1367	0.0319649	47.198		2	H	ADVNYRDAEGKTAIHHAVQAERSGMAEL___	X;X;X;X;X;X;X;X;X;X;X;Phospho (STY);X;X;Histidine Methyl (H);Histidine Methyl (H);X;X;Deamidation (NQ);X;X;X;X;X;X;X;X;X;X;X;X	XXXXXXXXXXXPPPPPPPPPPPXXXXXXXXX	TAIH(1)H(1)AVQAER	TAIH(45.14)H(45.14)AVQAER	5	2	-3.0822	0	4418.9	0	0	4648.1	0	0	6348.5	0	0	4796.7	0	0	4839.6	0	0	5806.3	0	0	3970.6	0	0	4028.8	0
Q5BAM0	212	Q5BAM0	Q5BAM0		1	63.2101	0.0269722	63.21	26.235	63.21	1	63.2101	0.0269722	63.21		1	H	ELTSVALGVFRDVVKHMPDGMGGAKWWEDLQ	X;X;X;X;X;X;X;X;X;X;X;X;X;X;X;Histidine Methyl (H);Oxidation (M);X;X;X;Oxidation (M);X;X;X;X;X;X;X;X;X;X	XXXXXXXXXXXXXXXPPPPPPPPPPXXXXXX	H(1)MPDGMGGAK	H(63.21)MPDGMGGAK	1	2	3.4201	113860	0	0	70272	0	0	248080	0	0	56061	0	0	214580	0	0	450340	0	0	144600	0	0	93445	0	0
Q5AQT5	217	Q5AQT5	Q5AQT5		1	85.7306	0.0100362	85.731	35.124	85.731	1	85.7306	0.0100362	85.731		1	H	DDEYGGSVANRSRLLHQVLQKVAKAIGADKV	X;X;X;X;X;X;X;X;X;X;X;Phospho (STY);X;X;X;Histidine Methyl (H);X;X;X;Deamidation (NQ);X;X;X;X;X;X;X;X;X;X;X	XXXXXXXXXXXPPPPPPPPPPXXXXXXXXXX	SRLLH(1)QVLQK	SRLLH(85.73)QVLQK	5	2	-0.89238	11327	0	0	11732	0	0	15516	0	0	18951	0	0	16975	0	0	23295	0	0	11449	0	0	13656	0	0
C8VTP0	219	C8VTP0	C8VTP0		1	43.7698	0.0382786	43.77	15.908	43.77	1	43.7698	0.0382786	43.77		1	H	WKDMVAAEEQRLKNKHQSLYEKHQNDAGSDP	X;X;X;Oxidation (M);X;X;X;X;X;X;X;X;X;Deamidation (NQ);X;Histidine Methyl (H);X;Phospho (STY);X;Phospho (STY);X;X;X;Deamidation (NQ);X;X;X;X;X;X;X	XXXXXXXXXXXXXPPPPPPPPPXXXXXXXXX	NKH(1)QSLYEK	NKH(43.77)QSLYEK	3	3	4.2572	26133	0	0	21349	0	0	22394	0	0	26306	0	0	47039	0	0	45715	0	0	26301	0	0	34306	0	0
G5EAX5	224	G5EAX5	G5EAX5		0.852175	7.60818	0.0059888	59.862	47.236	59.862	0.852175	7.60818	0.0059888	59.862		1	H	SKDRWDECMHVLARLHGNGDMNHPLVLAQYK	X;X;X;X;X;X;X;X;X;X;X;X;X;X;X;Histidine Methyl (H);X;Deamidation (NQ);X;X;Oxidation (M);Deamidation (NQ);X;X;X;X;X;X;X;X;X	XXXXXXXXXXXXXXPPPPPPPPPPPPPPPPP	LH(0.852)GNGDMNH(0.148)PLVLAQYK	LH(7.61)GNGDMNH(-7.61)PLVLAQYK	2	3	3.9503	2983.1	0	0	2498.5	0	0	3600	0	0	3208.7	0	0	10553	0	0	10944	0	0	6163	0	0	9093.1	0	0
C8VQH5	225	C8VQH5	C8VQH5		1	74.1273	0.0382559	74.127	55.352	74.127	1	74.1273	0.0382559	74.127		1	H	NSSQLLAKRAIISNDHRGKSRKERLDMAGDR	X;X;X;X;X;X;X;X;X;X;X;X;X;X;X;Histidine Methyl (H);X;X;X;X;X;X;X;X;X;X;X;X;X;X;X	XXXXXXXXXPPPPPPPPXXXXXXXXXXXXXX	AIISNDH(1)R	AIISNDH(74.13)R	7	3	-0.19401	8801.4	0	0	6449.6	0	0	20429	0	0	9174.1	0	0	6306.6	0	0	8893.2	0	0	5372.9	0	0	5574.4	0	0
Q5BBW7	225	Q5BBW7	Q5BBW7		1	66.6919	0.012788	66.692	7.4935	66.692	1	66.6919	0.012788	66.692		1	H	LTLVPDVTFLPAFRPHGDQNVSQYKETVKLV	X;X;X;X;X;X;X;X;X;X;X;X;X;X;X;Histidine Methyl (H);X;X;X;X;X;Phospho (STY);X;Phospho (STY);X;X;X;X;X;X;X	XXXXXXXXXXXXXXPPPPPPPPPPPXXXXXX	PH(1)GDQNVSQYK	PH(66.69)GDQNVSQYK	2	2	-0.32607	7946.7	0	0	7654.3	0	0	7586.1	0	0	10558	0	0	1791.7	0	0	2770.9	0	0	1379.1	0	0	1254.4	0	0
Q5AWA5	229	Q5AWA5	Q5AWA5		1	50.6068	0.0201713	50.607	32.571	50.607	1	50.6068	0.0201713	50.607		1	H	GESKDLVANVTIAKDHLLNVMRGYMMLAVLI	X;X;X;X;X;X;X;X;X;X;X;X;X;X;X;Histidine Methyl (H);X;X;X;X;Oxidation (M);X;X;X;X;X;X;X;X;X;X	XXXXXXXXXXXXXXPPPPPPPPXXXXXXXXX	DH(1)LLNVMR	DH(50.61)LLNVMR	2	3	-4.2704	0	0	0	0	0	0	0	0	0	0	0	0	0	0	0	0	0	0	0	0	0	0	0	0
G5EAX5	231	G5EAX5	G5EAX5		0.654927	2.78282	6.10009e-05	122.33	109.23	122.33	0.654927	2.78282	6.10009e-05	122.33		1	H	CMHVLARLHGNGDMNHPLVLAQYKEIQDALA	X;X;X;X;X;X;X;X;X;X;Deamidation (NQ);X;X;Oxidation (M);Deamidation (NQ);Histidine Methyl (H);X;X;X;X;X;X;X;X;X;X;Deamidation (NQ);X;X;X;X	XXXXXXXPPPPPPPPPPPPPPPPPXXXXXXX	LH(0.345)GNGDMNH(0.655)PLVLAQYK	LH(-2.78)GNGDMNH(2.78)PLVLAQYK	9	4	3.7644	7438.5	0	0	7295	0	0	11304	0	0	9400.3	0	0	17189	0	0	21400	0	0	10529	0	0	16914	0	0
Q5B617	243	Q5B617	Q5B617		1	66.4975	0.0403984	66.498	33.302	66.498	1	66.4975	0.0403984	66.498		1	H	PEQQARPSNDDLSSKHTGDIPNERFARVQRY	X;X;X;X;X;X;X;X;X;X;X;X;X;X;X;Histidine Methyl (H);Phospho (STY);X;X;X;X;X;X;X;X;X;X;X;X;X;X	XXXXXXXXXXXXXXXPPPPPPPPPPPPXXXX	H(1)TGDIPNERFAR	H(66.5)TGDIPNERFAR	1	3	-1.4183	7560.9	0	0	7229.5	0	0	10421	0	0	9301.2	0	0	10542	0	0	13675	0	0	7669	0	0	9238.4	0	0
C8VLW1	244	C8VLW1	C8VLW1		0.99921	31.022	0.0260589	41.711	20.772	41.711	0.99921	31.022	0.0260589	41.711		1	H	DTHLGGQDFDTNLLEHFKKEFQKKTGKDLSG	X;X;X;X;X;X;Deamidation (NQ);X;X;X;X;Deamidation (NQ);X;X;X;Histidine Methyl (H);X;X;X;X;X;X;X;X;X;X;X;X;X;X;X	PPPPPPPPPPPPPPPPPPXXXXXXXXXXXXX	ATAGDTH(0.001)LGGQDFDTNLLEH(0.999)FK	ATAGDTH(-31.02)LGGQDFDTNLLEH(31.02)FK	20	4	3.142	4317.6	0	0	4305	0	0	5415.5	0	0	3697.4	0	0	3806.7	0	0	3984.7	0	0	2555.6	0	0	3229.5	0	0
Q5B7U3	245	Q5B7U3	Q5B7U3		1	57.5896	0.0471145	57.59	10.523	57.59	1	57.5896	0.0471145	57.59		1	H	YLRRRMVHAAKLRPNHQDSLKRLNRVVIYMV	X;X;X;X;X;X;X;X;X;X;X;X;X;X;Deamidation (NQ);Histidine Methyl (H);Deamidation (NQ);X;X;X;X;X;X;X;X;X;X;X;X;X;X	XXXXXXXXXXXPPPPPPPPPPXXXXXXXXXX	LRPNH(1)QDSLK	LRPNH(57.59)QDSLK	5	2	-2.3021	12303	0	0	13403	0	0	32959	0	0	9973.7	0	0	37071	0	0	51710	0	0	37295	0	0	60087	0	0
Q5B4F5	247	Q5B4F5	Q5B4F5		1	86.1905	1.30775e-05	86.19	57.778	86.19	1	86.1905	1.30775e-05	86.19		1	H	TRDEAQPLTVTGQSGHDLPVALDGVVGNTLR	X;X;X;X;X;Deamidation (NQ);X;X;X;X;X;X;Deamidation (NQ);X;X;Histidine Methyl (H);X;X;X;X;X;X;X;X;X;X;X;X;X;X;X	XXPPPPPPPPPPPPPPPPPPPPPPPPPPPPP	DEAQPLTVTGQSGH(1)DLPVALDGVVGNTLR	DEAQPLTVTGQSGH(86.19)DLPVALDGVVGNTLR	14	3	2.8992	6218.1	0	0	6087	0	0	5791.1	0	0	3543.4	0	0	0	0	0	297.94	0	0	363.34	0	0	0	0	0
Q5AQC1	248	Q5AQC1	Q5AQC1		1	60.2551	0.039881	60.255	29.427	60.255	1	60.2551	0.039881	60.255		1	H	RNHNGRNNQRQRGRGHRGQGQGQSQKHGQAQ	X;X;X;X;X;X;X;X;X;X;X;X;X;X;X;Histidine Methyl (H);X;X;X;X;X;X;Deamidation (NQ);X;X;X;X;X;X;X;X	XXXXXXXXXXXXXXPPPPPPPPPPPPXXXXX	GH(1)RGQGQGQSQK	GH(60.26)RGQGQGQSQK	2	4	-0.50108	399.23	0	0	314.03	0	0	908.95	0	0	568.56	0	0	960.04	0	0	1128.4	0	0	1138.5	0	0	1243.4	0	0
C8VBT4	251	C8VBT4	C8VBT4		1	49.2502	0.00639575	49.25	33.312	49.25	1	49.2502	0.00639575	49.25		1	H	SGALGLLQGSPTYPDHTKQDVYSWSQPQPLQ	X;X;X;X;X;X;X;X;X;X;X;X;X;X;X;Histidine Methyl (H);X;X;X;X;X;X;X;X;X;X;X;X;X;X;X	PPPPPPPPPPPPPPPPPPXXXXXXXXXXXXX	SLTNGDQLSSGALGLLQGSPTYPDH(1)TK	SLTNGDQLSSGALGLLQGSPTYPDH(49.25)TK	25	5	2.5421	13811	0	0	10795	0	0	17462	0	0	11104	0	0	10194	0	0	10964	0	0	5031.3	0	0	9627.3	0	0
C8VI18	253	C8VI18	C8VI18		1	59.7997	0.0188058	59.8	17.799	59.8	1	59.7997	0.0188058	59.8		2	H	GPAMGYAVVMQGRYLHHQALKALGGRERISM	X;X;X;X;X;X;X;X;X;X;X;X;X;Phospho (STY);X;Histidine Methyl (H);Histidine Methyl (H);Deamidation (NQ);X;X;X;X;X;X;X;X;X;X;X;X;X	XXXXXXXXXXXXXPPPPPPPPXXXXXXXXXX	YLH(1)H(1)QALK	YLH(59.8)H(59.8)QALK	3	3	2.2481	0	18245	0	0	15101	0	0	23085	0	0	24691	0	0	17399	0	0	22135	0	0	14135	0	0	19073	0
Q5B6A4	253	Q5B6A4	Q5B6A4		0.878874	16.1869	0.0126618	52.298	9.658	52.298	0.878874	16.1869	0.0126618	52.298		1	H	DDKTIRLWNVLTGKAHPTPFIGHHNYVYAIA	X;X;X;X;X;X;X;X;X;X;X;X;X;X;X;Histidine Methyl (H);X;Phospho (STY);X;X;X;X;X;X;X;X;X;X;X;X;X	XXXXXXXXXXXXXXPPPPPPPPPPPPPPPPP	AH(0.879)PTPFIGH(0.061)H(0.061)NYVYAIAFSPK	AH(16.19)PTPFIGH(-16.19)H(-16.19)NYVYAIAFSPK	2	4	-1.7685	12692	0	0	13189	0	0	13629	0	0	16695	0	0	23994	0	0	21307	0	0	14555	0	0	16363	0	0
C8VI18	254	C8VI18	C8VI18		1	59.7997	0.0188058	59.8	17.799	59.8	1	59.7997	0.0188058	59.8		2	H	PAMGYAVVMQGRYLHHQALKALGGRERISMV	X;X;X;X;X;X;X;X;X;X;X;X;Phospho (STY);X;Histidine Methyl (H);Histidine Methyl (H);Deamidation (NQ);X;X;X;X;X;X;X;X;X;X;X;X;X;X	XXXXXXXXXXXXPPPPPPPPXXXXXXXXXXX	YLH(1)H(1)QALK	YLH(59.8)H(59.8)QALK	4	3	2.2481	0	18245	0	0	15101	0	0	23085	0	0	24691	0	0	17399	0	0	22135	0	0	14135	0	0	19073	0
C8VNV1	260	C8VNV1	C8VNV1		1	51.4453	0.054482	51.445	15.142	51.445	1	51.4453	0.054482	51.445		1	H	YSLKPNRRTLEMAQEHWRLEQSVLQHRQEEV	X;X;X;X;X;X;X;X;Phospho (STY);X;X;Oxidation (M);X;X;X;Histidine Methyl (H);X;X;X;X;X;X;X;X;X;X;X;X;X;X;X	XXXXXXXXPPPPPPPPPPXXXXXXXXXXXXX	TLEMAQEH(1)WR	TLEMAQEH(51.45)WR	8	3	-3.5143	4954.5	0	0	4449.1	0	0	8298.8	0	0	4803.1	0	0	7455.2	0	0	5367.2	0	0	5377.4	0	0	4654.4	0	0
Q5AZ08	260	Q5AZ08	Q5AZ08		1	67.4165	0.00104935	67.416	24.301	67.416	1	67.4165	0.00104935	67.416		1	H	VDNETSSNSTYLQEAHKIAMSAIAALTDDYH	X;X;Deamidation (NQ);X;X;X;X;Deamidation (NQ);Phospho (STY);X;X;X;Deamidation (NQ);X;X;Histidine Methyl (H);X;X;X;X;X;X;X;X;X;X;X;X;X;X;X	PPPPPPPPPPPPPPPPPXXXXXXXXXXXXXX	AVDNETSSNSTYLQEAH(1)K	AVDNETSSNSTYLQEAH(67.42)K	17	3	4.3431	69367	0	0	61837	0	0	72254	0	0	93113	0	0	42928	0	0	70503	0	0	45106	0	0	46728	0	0
Q5B0N6	263	Q5B0N6	Q5B0N6		1	72.1384	0.0297852	72.138	9.4211	72.138	1	72.1384	0.0297852	72.138		1	H	DRNSVLRGIKQTDFSHVRKVAETFLGRNRSR	X;X;X;X;X;X;X;X;X;X;Deamidation (NQ);X;X;X;X;Histidine Methyl (H);X;X;X;X;X;X;X;X;X;X;X;X;X;X;X	XXXXXXXXXXPPPPPPPPXXXXXXXXXXXXX	QTDFSH(1)VR	QTDFSH(72.14)VR	6	2	-1.5395	0	0	0	0	0	0	0	0	0	0	0	0	0	0	0	0	0	0	0	0	0	0	0	0
C8VTL4	264	C8VTL4	C8VTL4		1	42.7886	0.0478061	42.789	13.813	42.789	1	42.7886	0.0478061	42.789		1	H	SDAISTKPVVYNALRHGLEKSPDSRPSDLAI	X;X;X;X;X;X;X;X;X;X;Phospho (STY);Deamidation (NQ);X;X;X;Histidine Methyl (H);X;X;X;X;X;X;X;X;X;X;X;X;X;X;X	XXXXXXXPPPPPPPPPPPPPXXXXXXXXXXX	PVVYNALRH(1)GLEK	PVVYNALRH(42.79)GLEK	9	3	-1.0341	5904.1	0	0	4106.3	0	0	6062.7	0	0	4413.8	0	0	4539.4	0	0	5679.5	0	0	3746.2	0	0	3700.8	0	0
Q5BDB4	266	Q5BDB4	Q5BDB4		1	106.435	1.15474e-10	106.43	84.424	106.43	1	106.435	1.15474e-10	106.43		1	H	AENHDLAYFKNMLADHQAAIQQEEEEREAQE	X;X;X;X;X;X;X;X;X;X;Deamidation (NQ);Oxidation (M);X;X;X;Histidine Methyl (H);X;X;X;X;X;X;X;X;X;X;X;X;X;X;X	XXXXXXXXXXPPPPPPPPPPPPPPPPPPPPP	NMLADH(1)QAAIQQEEEEREAQEAAK	NMLADH(106.43)QAAIQQEEEEREAQEAAK	6	4	-3.819	107790	0	0	84196	0	0	120390	0	0	95420	0	0	102880	0	0	98412	0	0	46758	0	0	70252	0	0
C8V904	267	C8V904	C8V904		0.581314	3.35513	0.045193	43.592	19.305	43.592	0.581314	3.35513	0.045193	43.592		1	H	QQYRAEIRSHKSTLRHMEDEVAPRAEPGTHE	X;X;X;X;X;X;X;X;Phospho (STY);X;X;X;X;X;X;Histidine Methyl (H);Oxidation (M);X;X;X;X;X;X;X;X;X;X;X;X;X;X	XXXXXXXXPPPPPPPPPPPPPPPPXXXXXXX	SH(0.419)KSTLRH(0.581)MEDEVAPR	SH(-3.36)KSTLRH(3.36)MEDEVAPR	8	3	3.6846	12747	0	0	14480	0	0	31089	0	0	11285	0	0	12722	0	0	12589	0	0	8295.6	0	0	10527	0	0
C8VF70	276	C8VF70	C8VF70		0.997672	27.5833	0.026469	51.927	24.957	51.927	0.997672	27.5833	0.026469	51.927		1	H	KPVGSIKNYVPKKLVHTWKSHTKAITSLRFF	X;X;X;X;X;X;X;X;X;X;X;X;X;X;X;Histidine Methyl (H);Phospho (STY);X;X;Phospho (STY);X;X;X;X;X;X;X;X;X;X;X	XXXXXXXXXXXXXPPPPPPPPPPXXXXXXXX	LVH(0.998)TWKSH(0.002)TK	LVH(27.58)TWKSH(-27.58)TK	3	4	3.3094	18586	0	0	8341.9	0	0	19143	0	0	20994	0	0	35305	0	0	36098	0	0	22541	0	0	25666	0	0
Q00730	279	Q00730	Q00730		1	125.72	0.0223248	125.72	84.272	125.72	1	125.72	0.0223248	125.72		1	H	AERAQFRSNPSALVEHTKSIEAEVNGMWGAF	X;X;X;X;X;X;X;X;Deamidation (NQ);X;X;X;X;X;X;Histidine Methyl (H);X;X;X;X;X;X;X;X;X;X;X;X;X;X;X	XXXXXXXPPPPPPPPPPPXXXXXXXXXXXXX	SNPSALVEH(1)TK	SNPSALVEH(125.72)TK	9	2	-0.38217	69161	0	0	58514	0	0	85320	0	0	69391	0	0	37167	0	0	60072	0	0	35764	0	0	40867	0	0
Q5BFJ6	281	Q5BFJ6	Q5BFJ6		1	42.7886	0.0316856	42.789	17.071	42.789	1	42.7886	0.0316856	42.789		2	H	TDNSSPTKRPNSAAGHSRSHKSMSSNLLIAA	X;X;X;X;X;X;X;X;X;X;X;Phospho (STY);X;X;X;Histidine Methyl (H);Phospho (STY);X;X;Histidine Methyl (H);X;X;X;X;X;X;X;X;X;X;X	XXXXXXXXPPPPPPPPPPPPPXXXXXXXXXX	RPNSAAGH(1)SRSH(1)K	RPNSAAGH(42.79)SRSH(42.79)K	8	3	2.0904	0	6235.4	0	0	5220	0	0	15646	0	0	7322.8	0	0	11798	0	0	17015	0	0	14733	0	0	24256	0
Q5ATI6	285	Q5ATI6	Q5ATI6		1	59.8708	0.0445309	59.871	38.03	59.871	1	59.8708	0.0445309	59.871		1	H	IMFAAKVLTRRFKAYHVDLYAEDLNIKDSAK	X;X;X;X;X;X;X;X;X;X;X;X;X;X;X;Histidine Methyl (H);X;X;X;X;X;X;X;X;X;X;X;X;X;X;X	XXXXXXXXXXXXXPPPPPPPPPPPPPPXXXX	AYH(1)VDLYAEDLNIK	AYH(59.87)VDLYAEDLNIK	3	3	0.38982	41083	0	0	59278	0	0	155650	0	0	66023	0	0	13777	0	0	13076	0	0	8129.5	0	0	15477	0	0
Q5BFJ6	285	Q5BFJ6	Q5BFJ6		1	42.7886	0.0316856	42.789	17.071	42.789	1	42.7886	0.0316856	42.789		2	H	SPTKRPNSAAGHSRSHKSMSSNLLIAAFRKS	X;X;X;X;X;X;X;Phospho (STY);X;X;X;Histidine Methyl (H);Phospho (STY);X;X;Histidine Methyl (H);X;X;X;X;X;X;X;X;X;X;X;X;X;X;X	XXXXPPPPPPPPPPPPPXXXXXXXXXXXXXX	RPNSAAGH(1)SRSH(1)K	RPNSAAGH(42.79)SRSH(42.79)K	12	3	2.0904	0	6235.4	0	0	5220	0	0	15646	0	0	7322.8	0	0	11798	0	0	17015	0	0	14733	0	0	24256	0
C8VRF5	287	C8VRF5	C8VRF5		1	58.4333	0.0234297	58.433	24.883	58.433	1	58.4333	0.0234297	58.433		1	H	SVARLRTNNSGVRNTHFKMGQVVELLLDPKF	X;X;X;X;X;X;X;Deamidation (NQ);Deamidation (NQ);X;X;X;X;X;X;Histidine Methyl (H);X;X;X;X;X;X;X;X;X;X;X;X;X;X;X	XXXXXXPPPPPPPPPPPPXXXXXXXXXXXXX	TNNSGVRNTH(1)FK	TNNSGVRNTH(58.43)FK	10	2	2.4088	2986.3	0	0	6088.1	0	0	8135	0	0	17755	0	0	34530	0	0	21013	0	0	50645	0	0	47383	0	0
Q5B4P3	288	Q5B4P3	Q5B4P3		1	63.4796	0.0418339	63.48	8.4159	63.48	1	63.4796	0.0418339	63.48		1	H	KNFHIYCGYCKLRITHDTLRVRKFRNDITDL	X;X;X;X;X;X;X;X;X;X;X;X;X;X;X;Histidine Methyl (H);X;Phospho (STY);X;X;X;X;X;X;X;X;X;X;X;X;X	XXXXXXXXXXXXXPPPPPPPPPPXXXXXXXX	ITH(1)DTLRVRK	ITH(63.48)DTLRVRK	3	2	0.42557	22166	0	0	19496	0	0	24948	0	0	20234	0	0	7828	0	0	11819	0	0	6428.4	0	0	7895.1	0	0
C8VKV5	290	C8VKV5	C8VKV5		1	57.1775	0.0302833	57.177	8.4218	57.177	1	57.1775	0.0302833	57.177		1	H	ILRLGIRSPATRAKSHPQNQKRRKRIGDRRC	X;X;X;X;X;X;X;X;X;X;X;X;X;X;X;Histidine Methyl (H);X;Deamidation (NQ);Deamidation (NQ);Deamidation (NQ);X;X;X;X;X;X;X;X;X;X;X	XXXXXXXXXXXXXXPPPPPPPXXXXXXXXXX	SH(1)PQNQK	SH(57.18)PQNQK	2	3	0.43417	27704	0	0	21682	0	0	27328	0	0	31731	0	0	20075	0	0	29493	0	0	19526	0	0	18833	0	0
C8VNE3	292	C8VNE3	C8VNE3		1	54.4082	0.0383737	54.408	18.97	54.408	1	54.4082	0.0383737	54.408		2	H	PAEITDHELDMELSRHVQHLQKIKATVIAEV	X;X;X;X;X;X;X;X;X;X;X;X;X;X;X;Histidine Methyl (H);X;X;Histidine Methyl (H);X;Deamidation (NQ);X;X;X;X;X;X;X;X;X;X	XXXXXXXXXXXXXXXPPPPPPPXXXXXXXXX	H(1)VQH(1)LQK	H(54.41)VQH(54.41)LQK	1	3	2.8037	0	112280	0	0	72325	0	0	148330	0	0	101850	0	0	89163	0	0	119700	0	0	54470	0	0	79976	0
Q5ARX3	292	Q5ARX3	Q5ARX3		1	45.368	0.0370268	45.368	8.4235	45.368	1	45.368	0.0370268	45.368		1	H	DDLPKLPFTARAETVHFKLQQFQAGRKLWVA	X;X;X;X;X;X;X;X;Phospho (STY);X;X;X;X;Phospho (STY);X;Histidine Methyl (H);X;X;X;X;X;X;X;X;X;X;X;X;X;X;X	XXXXXPPPPPPPPPPPPPXXXXXXXXXXXXX	LPFTARAETVH(1)FK	LPFTARAETVH(45.37)FK	11	2	-2.0203	6127.2	0	0	2145.1	0	0	6770.7	0	0	6620.6	0	0	20133	0	0	11461	0	0	12842	0	0	16543	0	0
Q5B942	292	Q5B942	Q5B942		1	91.8534	0.0519164	91.853	23.873	91.853	1	91.8534	0.0519164	91.853		1	H	ARIAYSTEPEFEHNRHSGDEELIARLRRRGR	X;X;X;X;X;X;X;X;X;X;X;X;X;X;X;Histidine Methyl (H);X;X;X;X;X;X;X;X;X;X;X;X;X;X;X	XXXXXXXXXXXXXXXPPPPPPPPPPXXXXXX	H(1)SGDEELIAR	H(91.85)SGDEELIAR	1	2	0.33581	16951	0	0	15948	0	0	27640	0	0	14275	0	0	8208.6	0	0	8929.7	0	0	8801.4	0	0	7223.2	0	0
C8VNE3	295	C8VNE3	C8VNE3		1	54.4082	0.0383737	54.408	18.97	54.408	1	54.4082	0.0383737	54.408		2	H	ITDHELDMELSRHVQHLQKIKATVIAEVQAD	X;X;X;X;X;X;X;X;X;X;X;X;Histidine Methyl (H);X;X;Histidine Methyl (H);X;Deamidation (NQ);X;X;X;X;X;X;X;X;X;X;X;X;X	XXXXXXXXXXXXPPPPPPPXXXXXXXXXXXX	H(1)VQH(1)LQK	H(54.41)VQH(54.41)LQK	4	3	2.8037	0	112280	0	0	72325	0	0	148330	0	0	101850	0	0	89163	0	0	119700	0	0	54470	0	0	79976	0
Q8TFN1	296	Q8TFN1	Q8TFN1		0.499841	0	0.0253293	46.89	7.5044	46.89	0.499841	0	0.0253293	46.89			H	PLPRGSTKARQITKNHLPSHTSTPNLRPMEA	X;X;X;X;X;X;X;X;X;X;Deamidation (NQ);X;X;X;X;Histidine Methyl (H);X;X;Phospho (STY);X;X;X;X;X;Deamidation (NQ);X;X;X;X;X;X	XXXXXXXXXXPPPPPPPPPPPPPPPPPXXXX	QITKNH(0.5)LPSH(0.5)TSTPNLR	QITKNH(0)LPSH(0)TSTPNLR	6	3	-3.7041	0	0	0	0	0	0	0	0	0	0	0	0	0	0	0	0	0	0	0	0	0	0	0	0
C8V1W8	297	C8V1W8	C8V1W8		1	57.1775	0.0461021	57.177	27.704	57.177	1	57.1775	0.0461021	57.177		1	H	NSSHRRITLFRVNPTHTRKIYRNAPRKQEIG	X;X;X;X;X;X;X;X;X;X;X;X;X;X;X;Histidine Methyl (H);Phospho (STY);X;X;X;X;X;X;X;X;X;X;X;X;X;X	XXXXXXXXXXXPPPPPPPPXXXXXXXXXXXX	VNPTH(1)TRK	VNPTH(57.18)TRK	5	2	1.2993	118590	0	0	93119	0	0	179510	0	0	122630	0	0	64625	0	0	111090	0	0	53880	0	0	53279	0	0
Q5AW97	299	Q5AW97	Q5AW97		1	47.2879	0.0474027	47.288	18.33	47.288	1	47.2879	0.0474027	47.288		1	H	VGVASRREAASFVQPHRPISRATSFKGIFER	X;X;X;X;X;X;X;X;X;X;Phospho (STY);X;X;X;X;Histidine Methyl (H);X;X;X;X;X;X;X;X;X;X;X;X;X;X;X	XXXXXXPPPPPPPPPPPXXXXXXXXXXXXXX	REAASFVQPH(1)R	REAASFVQPH(47.29)R	10	3	-2.6243	11103	0	0	12796	0	0	14840	0	0	14231	0	0	10035	0	0	12008	0	0	8138.2	0	0	9962.5	0	0
Q5AZB0	299	Q5AZB0	Q5AZB0		1	40.0672	0.0561566	40.067	22.631	40.067	1	40.0672	0.0561566	40.067		1	H	SPPERMDRSMSRPREHRQPRPSIFEPPAIDY	X;X;X;X;X;X;X;X;X;X;X;X;X;X;X;Histidine Methyl (H);X;X;X;X;X;X;X;X;X;X;X;X;X;X;X	XXXXXXXXXXXXPPPPPPPPXXXXXXXXXXX	PREH(1)RQPR	PREH(40.07)RQPR	4	3	3.4304	0	0	0	0	0	0	0	0	0	0	0	0	0	0	0	0	0	0	0	0	0	0	0	0
Q5B8K6	299	Q5B8K6	Q5B8K6		1	43.442	0.0430462	43.442	17.705	43.442	1	43.442	0.0430462	43.442		1	H	GSLKDPMPALIFPRRHAPIRTSTLPRSPDVG	X;X;X;X;X;X;X;X;X;X;X;X;X;X;X;Histidine Methyl (H);X;X;X;X;Phospho (STY);Phospho (STY);X;X;X;X;X;X;X;X;X	XXXXXXXXXXXXXXXPPPPPPPPPPPXXXXX	H(1)APIRTSTLPR	H(43.44)APIRTSTLPR	1	2	-3.6613	16352	0	0	14534	0	0	17867	0	0	27734	0	0	15679	0	0	21389	0	0	10325	0	0	13386	0	0
Q8TFN1	300	Q8TFN1	Q8TFN1		0.500159	0	0.0253293	46.89	7.5044	46.89	0.500159	0	0.0253293	46.89		1	H	GSTKARQITKNHLPSHTSTPNLRPMEAKDVD	X;X;X;X;X;X;X;X;X;X;X;X;X;X;X;X;X;X;X;X;X;X;X;X;X;X;X;X;X;X;X	XXXXXXXXXXXXXXXXXXXXXXXXXXXXXXX	QITKNH(0.5)LPSH(0.5)TSTPNLR	QITKNH(0)LPSH(0)TSTPNLR	10	3	-3.7041	18939	0	0	20066	0	0	23624	0	0	32097	0	0	17931	0	0	20496	0	0	12772	0	0	17185	0	0
Q5AT32	303	Q5AT32	Q5AT32		1	49.3676	0.0279611	49.368	33.796	49.368	1	49.3676	0.0279611	49.368		1	H	SKGASFGMSALGRSKHTQLESGTVSKAGRDS	X;X;X;X;X;X;X;Oxidation (M);X;X;X;X;X;X;X;Histidine Methyl (H);Phospho (STY);Deamidation (NQ);X;X;X;X;Phospho (STY);X;X;X;X;X;X;X;X	XXXXXXXXXXXXXXXPPPPPPPPPPPXXXXX	H(1)TQLESGTVSK	H(49.37)TQLESGTVSK	1	2	-0.036865	351.78	0	0	296.66	0	0	867.57	0	0	345.48	0	0	1031.9	0	0	852.72	0	0	781.07	0	0	976.89	0	0
Q5AWH2	305	Q5AWH2	Q5AWH2		1	47.6659	0.0259478	47.666	11.382	47.666	1	47.6659	0.0259478	47.666		1	H	AQCAYKTGLQIVEMVHADRKPSDIMTREAFE	X;X;X;X;X;X;X;X;X;Deamidation (NQ);X;X;X;X;X;Histidine Methyl (H);X;X;X;X;X;X;X;X;X;X;X;X;X;X;X	XXXXXXPPPPPPPPPPPPPPXXXXXXXXXXX	TGLQIVEMVH(1)ADRK	TGLQIVEMVH(47.67)ADRK	10	3	0.22128	167310	0	0	130880	0	0	215380	0	0	159200	0	0	46889	0	0	67178	0	0	29555	0	0	27366	0	0
Q5AYK2	308	Q5AYK2	Q5AYK2		1	43.6798	0.050868	43.68	23.94	43.68	1	43.6798	0.050868	43.68		1	H	LPDSTSDSSMRTGSMHTVARSQRNRRTQFLF	X;X;X;X;X;X;X;X;X;Oxidation (M);X;X;X;X;Oxidation (M);Histidine Methyl (H);X;X;X;X;X;Deamidation (NQ);X;X;X;X;X;X;X;X;X	XXXXXXXXXXXPPPPPPPPPPPPXXXXXXXX	TGSMH(1)TVARSQR	TGSMH(43.68)TVARSQR	5	4	4.4252	5647.9	0	0	4391.7	0	0	15538	0	0	7905	0	0	10506	0	0	19783	0	0	10131	0	0	13033	0	0
Q5AYQ3	308	Q5AYQ3	Q5AYQ3		1	90.3084	0.0376385	90.308	29.719	90.308	1	90.3084	0.0376385	90.308		1	H	NASHDIVRANLDKSVHIRETVKGPRYCPSLE	X;X;X;X;X;X;X;X;X;X;X;X;X;X;X;Histidine Methyl (H);X;X;X;Phospho (STY);X;X;X;X;X;X;X;X;X;X;X	XXXXXXXXXXXXXPPPPPPPPPXXXXXXXXX	SVH(1)IRETVK	SVH(90.31)IRETVK	3	2	-1.8933	112610	0	0	99318	0	0	122260	0	0	158690	0	0	25493	0	0	44992	0	0	27145	0	0	22000	0	0
Q5B9M9	308	Q5B9M9	Q5B9M9		0.999999	61.427	0.00890053	88.134	72.243	88.134	0.999999	61.427	0.00890053	88.134		1	H	RDQPPQRLPQQHLPQHGRGLSAGLPLITNPQ	X;X;X;X;X;X;X;X;X;X;X;X;X;X;X;Histidine Methyl (H);X;X;X;X;X;X;X;X;X;X;X;X;X;X;X	XXXXXXXPPPPPPPPPPPXXXXXXXXXXXXX	LPQQHLPQH(1)GR	LPQQH(-61.43)LPQH(61.43)GR	9	3	0.36126	21690	0	0	18898	0	0	38803	0	0	29915	0	0	39376	0	0	48058	0	0	29434	0	0	37253	0	0
Q5AS56	311	Q5AS56	Q5AS56		1	56.5476	0.0203126	56.563	15.375	56.548	1	56.5476	0.0203126	56.563		1	H	GTQFLAKTLNSTLMSHIRDRLPDIKARLNTL	X;X;X;X;X;X;X;X;X;Deamidation (NQ);X;X;X;Oxidation (M);X;Histidine Methyl (H);X;X;X;X;X;X;X;X;X;X;X;X;X;X;X	XXXXXXXPPPPPPPPPPPXXXXXXXXXXXXX	TLNSTLMSH(1)IR	TLNSTLMSH(56.55)IR	9	3	-2.5589	28433	0	0	23527	0	0	36831	0	0	33453	0	0	22351	0	0	27058	0	0	18794	0	0	22444	0	0
Q5AYK9	321	Q5AYK9	Q5AYK9		1	59.3058	0.024188	82.379	35.119	59.306	1	59.3058	0.024188	82.379		1	H	CFIKFLKQAGVSNVQHLELGKWGIHGNAHLQ	X;X;X;X;X;X;X;X;X;X;X;X;X;X;X;Histidine Methyl (H);X;X;X;X;X;X;X;X;X;X;X;X;X;X;X	XXXXXXXPPPPPPPPPPPPPPXXXXXXXXXX	QAGVSNVQH(1)LELGK	QAGVSNVQH(59.31)LELGK	9	3	-0.31075	185890	0	0	52126	0	0	291340	0	0	50153	0	0	44635	0	0	45055	0	0	17615	0	0	22329	0	0
C8V248	325	C8V248	C8V248		1	47.5678	0.0222464	47.568	6.1554	47.568	1	47.5678	0.0222464	47.568		1	H	FDAQARPRSMLTSGYHAVKIRIFDMGLVYKY	X;X;X;X;X;X;X;X;Phospho (STY);X;X;X;X;X;Phospho (STY);Histidine Methyl (H);X;X;X;X;X;X;X;X;X;X;X;X;X;X;X	XXXXXXPPPPPPPPPPPPPPPXXXXXXXXXX	PRSMLTSGYH(1)AVKIR	PRSMLTSGYH(47.57)AVKIR	10	4	-1.4451	7914.4	0	0	7109.4	0	0	10432	0	0	15183	0	0	10117	0	0	17464	0	0	9194.5	0	0	10352	0	0
Q5AZU4	334	Q5AZU4	Q5AZU4		1	45.9725	0.0353571	45.973	8.6088	45.973	1	45.9725	0.0353571	45.973		1	H	ASLQPLGFGWTKAEAHTSPKSKTKPKHTNLE	X;X;X;X;X;X;X;X;X;X;X;X;X;X;X;Histidine Methyl (H);Phospho (STY);X;X;X;Phospho (STY);X;X;X;X;X;X;X;X;X;X	XXXXXXXXXXXXPPPPPPPPPPXXXXXXXXX	AEAH(1)TSPKSK	AEAH(45.97)TSPKSK	4	4	0.15199	1725.8	0	0	1755.1	0	0	3465.7	0	0	8371.4	0	0	29127	0	0	30572	0	0	19608	0	0	28423	0	0
Q5BA22	335	Q5BA22	Q5BA22		1	61.038	0.0119793	61.038	11.411	61.038	1	61.038	0.0119793	61.038		1	H	SLTYAKTGAAIVKQPHATAFQVFDQKTLHLL	X;X;X;X;X;X;X;X;X;X;X;X;X;X;X;Histidine Methyl (H);X;Phospho (STY);X;X;Deamidation (NQ);X;X;X;Deamidation (NQ);X;X;X;X;X;X	XXXXXXXXXXXXXPPPPPPPPPPPPPXXXXX	QPH(1)ATAFQVFDQK	QPH(61.04)ATAFQVFDQK	3	3	-0.42514	106430	0	0	93110	0	0	43164	0	0	133580	0	0	22214	0	0	24642	0	0	15383	0	0	17572	0	0
Q5B6H6	338	Q5B6H6	Q5B6H6		1	44.1881	0.0519132	44.188	22.887	44.188	1	44.1881	0.0519132	44.188		1	H	TNRNILEMAEERTRNHEELDKWRKKSHHLEA	X;X;X;X;X;X;X;X;X;X;X;X;Phospho (STY);X;Deamidation (NQ);Histidine Methyl (H);X;X;X;X;X;X;X;X;X;X;X;X;X;X;X	XXXXXXXXXXXXPPPPPPPPPXXXXXXXXXX	TRNH(1)EELDK	TRNH(44.19)EELDK	4	3	2.0793	2505.9	0	0	2747.6	0	0	3829.1	0	0	3006.6	0	0	3584.1	0	0	3368.7	0	0	2604.7	0	0	2317.8	0	0
Q5AQM4	340	Q5AQM4	Q5AQM4		1	96.4916	0.0511587	96.492	53.307	96.492	1	96.4916	0.0511587	96.492		1	H	LSLSIDFYARLFVRIHRSPAQAKFMSGNTML	X;X;X;X;X;X;X;X;X;X;X;X;X;X;X;Histidine Methyl (H);X;Phospho (STY);X;X;X;X;X;X;X;X;X;X;X;X;X	XXXXXXXXXXXXXXPPPPPPPPPXXXXXXXX	IH(1)RSPAQAK	IH(96.49)RSPAQAK	2	2	-0.030535	47886	0	0	35752	0	0	53121	0	0	39421	0	0	15905	0	0	22562	0	0	13918	0	0	19637	0	0
Q5B0E9	351	Q5B0E9	Q5B0E9		1	75.7382	0.0348074	75.738	23.335	75.738	1	75.7382	0.0348074	75.738		1	H	DPAPEDSESPEVGRDHSVETLKGATAAVPAV	X;X;X;X;X;X;X;X;X;X;X;X;X;X;X;Histidine Methyl (H);X;X;X;X;X;X;X;X;X;X;X;X;X;X;X	XXXXXXXXXXXXXXPPPPPPPPXXXXXXXXX	DH(1)SVETLK	DH(75.74)SVETLK	2	3	0.39069	34131	0	0	24719	0	0	37433	0	0	41015	0	0	25669	0	0	35547	0	0	17328	0	0	19860	0	0
Q5AUN3	355	Q5AUN3	Q5AUN3		1	60.6481	0.0522716	60.648	11.861	60.648	1	60.6481	0.0522716	60.648		1	H	RDRDPRDRDSSGGRRHTLLPRPNEMTINPEV	X;X;X;X;X;X;X;X;X;X;X;X;X;X;X;Histidine Methyl (H);Phospho (STY);X;X;X;X;X;X;X;X;X;X;X;X;X;X	XXXXXXXXXXXXXXPPPPPPPXXXXXXXXXX	RH(1)TLLPR	RH(60.65)TLLPR	2	2	-2.062	54910	0	0	61653	0	0	60057	0	0	38863	0	0	18342	0	0	25599	0	0	13321	0	0	15204	0	0
Q5B1Q1	356	Q5B1Q1	Q5B1Q1		1	44.2994	0.0255654	53.569	29.293	44.299	1	44.2994	0.0255654	53.569		1	H	VKLTDFGLSTGGKKTHDNSYYQNLLKNSTSK	X;X;X;X;X;X;X;X;X;X;X;X;X;X;X;Histidine Methyl (H);X;X;Phospho (STY);X;X;X;X;X;X;X;X;X;X;X;X	XXXXXXXXXXXXXXPPPPPPPPPPPPXXXXX	TH(1)DNSYYQNLLK	TH(44.3)DNSYYQNLLK	2	5	4.3104	28958	0	0	18575	0	0	37005	0	0	25394	0	0	26510	0	0	24601	0	0	16275	0	0	19198	0	0
Q5B5H4	357	Q5B5H4	Q5B5H4		1	74.3762	0.0125757	74.376	25.279	74.376	1	74.3762	0.0125757	74.376		1	H	TFPGPQTSHHSRSSGHVRSDSRTRRTEHVYL	X;X;X;X;X;X;X;X;X;X;X;X;X;X;X;Histidine Methyl (H);X;X;Phospho (STY);X;X;X;X;X;X;X;X;X;X;X;X	XXXXXXXXXXXXPPPPPPPPPPPPXXXXXXX	SSGH(1)VRSDSRTR	SSGH(74.38)VRSDSRTR	4	2	0.66039	1421	0	0	1527.5	0	0	2282.8	0	0	2093.2	0	0	2633.3	0	0	2757.3	0	0	1235.9	0	0	0	0	0
Q5ARK3	360	Q5ARK3	Q5ARK3		1	55.4258	0.0275711	55.426	24.988	55.426	1	55.4258	0.0275711	55.426		2	H	LVAHALYFKKLLDKEHRAHRQAAKSLAAACA	X;X;X;X;X;X;X;X;X;X;X;X;X;X;X;Histidine Methyl (H);X;X;Histidine Methyl (H);X;Deamidation (NQ);X;X;X;X;X;X;X;X;X;X	XXXXXXXXXXXXXXPPPPPPPPPPXXXXXXX	EH(1)RAH(1)RQAAK	EH(55.43)RAH(55.43)RQAAK	2	3	4.1698	0	73932	0	0	63159	0	0	87757	0	0	64259	0	0	27751	0	0	24446	0	0	15343	0	0	18581	0
Q5ARK3	363	Q5ARK3	Q5ARK3		1	55.4258	0.0275711	55.426	24.988	55.426	1	55.4258	0.0275711	55.426		2	H	HALYFKKLLDKEHRAHRQAAKSLAAACAEVW	X;X;X;X;X;X;X;X;X;X;X;X;Histidine Methyl (H);X;X;Histidine Methyl (H);X;Deamidation (NQ);X;X;X;X;X;X;X;X;X;X;X;X;X	XXXXXXXXXXXPPPPPPPPPPXXXXXXXXXX	EH(1)RAH(1)RQAAK	EH(55.43)RAH(55.43)RQAAK	5	3	4.1698	0	73932	0	0	63159	0	0	87757	0	0	64259	0	0	27751	0	0	24446	0	0	15343	0	0	18581	0
Q5BB90	363	Q5BB90	Q5BB90		1	60.5185	0.0249153	60.518	25.986	60.518	1	60.5185	0.0249153	60.518		1	H	RALRLSLLGLITVRLHRRQEMLDSGRMRPVV	X;X;X;X;X;X;X;X;X;X;X;Phospho (STY);X;X;X;Histidine Methyl (H);X;X;X;X;X;X;X;X;X;X;X;X;X;X;X	XXXXPPPPPPPPPPPPPPXXXXXXXXXXXXX	LSLLGLITVRLH(1)RR	LSLLGLITVRLH(60.52)RR	12	2	-3.2189	2978.8	0	0	2069.4	0	0	2408.1	0	0	4723.7	0	0	2472	0	0	3764.3	0	0	1510.2	0	0	1598.6	0	0
C8VHC5	377	C8VHC5	C8VHC5		1	42.0954	0.0416969	42.095	19.864	42.095	1	42.0954	0.0416969	42.095		1	H	GPSEGGEGLPAPWRRHRADRGSSLSAQKWKQ	X;X;X;X;X;X;X;X;X;X;X;X;X;X;X;Histidine Methyl (H);X;X;X;X;X;X;X;X;X;X;X;X;X;X;X	XXXXXXXXXXXXXXXPPPPPPPPPPPPPXXX	H(1)RADRGSSLSAQK	H(42.1)RADRGSSLSAQK	1	4	-0.13095	26282	0	0	24869	0	0	23396	0	0	45953	0	0	17883	0	0	29688	0	0	11271	0	0	12033	0	0
C8V997	380	C8V997	C8V997		1	41.1636	0.0393964	41.164	9.1553	41.164	1	41.1636	0.0393964	41.164		2	H	ASVQDSDNEPGVGRTHQSTHEKQRARIADEI	X;X;X;X;X;Phospho (STY);X;X;X;X;X;X;X;X;Phospho (STY);Histidine Methyl (H);X;X;X;Histidine Methyl (H);X;X;Deamidation (NQ);X;X;X;X;X;X;X;X	XXXXXXXXXXXXXXPPPPPPPPPPXXXXXXX	TH(1)QSTH(1)EKQR	TH(41.16)QSTH(41.16)EKQR	2	4	-2.0545	0	6142.4	0	0	6234.7	0	0	7873.2	0	0	6074	0	0	4298.7	0	0	4415.9	0	0	3192.6	0	0	5108.6	0
C8V997	384	C8V997	C8V997		1	41.1636	0.0393964	41.164	9.1553	41.164	1	41.1636	0.0393964	41.164		2	H	DSDNEPGVGRTHQSTHEKQRARIADEIRRLE	X;Phospho (STY);X;X;X;X;X;X;X;X;Phospho (STY);Histidine Methyl (H);X;X;X;Histidine Methyl (H);X;X;Deamidation (NQ);X;X;X;X;X;X;X;X;X;X;X;X	XXXXXXXXXXPPPPPPPPPPXXXXXXXXXXX	TH(1)QSTH(1)EKQR	TH(41.16)QSTH(41.16)EKQR	6	4	-2.0545	0	6142.4	0	0	6234.7	0	0	7873.2	0	0	6074	0	0	4298.7	0	0	4415.9	0	0	3192.6	0	0	5108.6	0
C8VC65	384	C8VC65	C8VC65		1	83.3769	0.0434188	83.377	54.954	83.377	1	83.3769	0.0434188	83.377		1	H	VNYRVAHHQRPVDVQHRAVQIIADVVDKYGL	X;X;X;X;X;X;X;X;X;X;X;X;X;X;Deamidation (NQ);Histidine Methyl (H);X;X;X;X;X;X;X;X;X;X;X;X;X;X;X	XXXXXXXXXXPPPPPPPXXXXXXXXXXXXXX	PVDVQH(1)R	PVDVQH(83.38)R	6	3	0.52301	17797	0	0	11632	0	0	11405	0	0	9271.4	0	0	3212.9	0	0	4590.4	0	0	2911.5	0	0	5328.3	0	0
Q5AUM2	384	Q5AUM2	Q5AUM2		1	57.5984	0.0180444	57.598	37.269	57.598	1	57.5984	0.0180444	57.598		2	H	EVEFELLRRENDYMRHPHRKRHMGSVLGKLG	X;X;X;X;X;X;X;X;X;X;X;X;X;Oxidation (M);X;Histidine Methyl (H);X;Histidine Methyl (H);X;X;X;X;X;X;X;X;X;X;X;X;X	XXXXXXXXXPPPPPPPPPPXXXXXXXXXXXX	ENDYMRH(1)PH(1)R	ENDYMRH(57.6)PH(57.6)R	7	2	2.5048	0	13222	0	0	13814	0	0	13813	0	0	7972.2	0	0	4766.5	0	0	4456.5	0	0	4335.4	0	0	2570.2	0
Q5AUM2	386	Q5AUM2	Q5AUM2		1	57.5984	0.0180444	57.598	37.269	57.598	1	57.5984	0.0180444	57.598		2	H	EFELLRRENDYMRHPHRKRHMGSVLGKLGAG	X;X;X;X;X;X;X;X;X;X;X;Oxidation (M);X;Histidine Methyl (H);X;Histidine Methyl (H);X;X;X;X;X;X;X;X;X;X;X;X;X;X;X	XXXXXXXPPPPPPPPPPXXXXXXXXXXXXXX	ENDYMRH(1)PH(1)R	ENDYMRH(57.6)PH(57.6)R	9	2	2.5048	0	13222	0	0	13814	0	0	13813	0	0	7972.2	0	0	4766.5	0	0	4456.5	0	0	4335.4	0	0	2570.2	0
Q5B8H2	393	Q5B8H2	Q5B8H2		1	80.4381	0.00964263	80.438	10.382	80.438	1	80.4381	0.00964263	80.438		1	H	HLLNTSWTSHRLSPLHYEINKNAESYSLLTN	X;X;X;X;X;X;X;X;X;X;X;X;X;X;X;Histidine Methyl (H);Phospho (STY);X;X;Deamidation (NQ);X;X;X;X;X;X;X;X;X;X;X	XXXXXXXXXXXPPPPPPPPPPXXXXXXXXXX	LSPLH(1)YEINK	LSPLH(80.44)YEINK	5	2	3.9547	6435.2	0	0	4928.1	0	0	5945.8	0	0	9709.4	0	0	7456.4	0	0	13244	0	0	5297.4	0	0	6604.9	0	0
Q5BH85	398	Q5BH85	Q5BH85		1	52.7897	0.0341971	52.79	8.7985	52.79	1	52.7897	0.0341971	52.79		2	H	PQARSDDEDEQRRRQHKSHIINKHPHKHNEG	X;X;X;X;X;X;X;X;X;X;X;X;X;X;X;Histidine Methyl (H);X;Phospho (STY);Histidine Methyl (H);X;X;X;X;X;X;X;X;X;X;X;X	XXXXXXXXXXXXXXPPPPPPPPPXXXXXXXX	QH(1)KSH(1)IINK	QH(52.79)KSH(52.79)IINK	2	3	4.4087	0	29922	0	0	29204	0	0	11073	0	0	35124	0	0	27461	0	0	30040	0	0	13380	0	0	17870	0
Q5BH85	401	Q5BH85	Q5BH85		1	52.7897	0.0341971	52.79	8.7985	52.79	1	52.7897	0.0341971	52.79		2	H	RSDDEDEQRRRQHKSHIINKHPHKHNEGERR	X;X;X;X;X;X;X;X;X;X;X;X;Histidine Methyl (H);X;Phospho (STY);Histidine Methyl (H);X;X;X;X;X;X;X;X;X;X;X;X;X;X;X	XXXXXXXXXXXPPPPPPPPPXXXXXXXXXXX	QH(1)KSH(1)IINK	QH(52.79)KSH(52.79)IINK	5	3	4.4087	0	29922	0	0	29204	0	0	11073	0	0	35124	0	0	27461	0	0	30040	0	0	13380	0	0	17870	0
Q5B3F8	410	Q5B3F8	Q5B3F8		1	43.9912	0.0431372	43.991	9.459	43.991	1	43.9912	0.0431372	43.991		1	H	NEAPHRRVEYLNGLAHLQRCMREHSCRYGFI	X;X;X;X;X;X;X;X;X;Phospho (STY);X;Deamidation (NQ);X;X;X;Histidine Methyl (H);X;Deamidation (NQ);X;X;X;X;X;X;X;X;X;X;X;X;X	XXXXXXXPPPPPPPPPPPPXXXXXXXXXXXX	VEYLNGLAH(1)LQR	VEYLNGLAH(43.99)LQR	9	3	-4.4882	23424	0	0	16211	0	0	25906	0	0	20609	0	0	16262	0	0	17981	0	0	7963.7	0	0	9696.7	0	0
C8V9R1	417	C8V9R1	C8V9R1		1	44.6138	0.0410973	44.614	17.186	44.614	1	44.6138	0.0410973	44.614		1	H	LGPVKEAQAILGGNNHSDSYRSSPGGTQTYS	X;X;X;X;X;X;X;Deamidation (NQ);X;X;X;X;X;Deamidation (NQ);Deamidation (NQ);Histidine Methyl (H);X;X;X;X;X;X;X;X;X;X;X;X;X;X;X	XXXXXPPPPPPPPPPPPPPPPXXXXXXXXXX	EAQAILGGNNH(1)SDSYR	EAQAILGGNNH(44.61)SDSYR	11	2	-3.5182	16792	0	0	17037	0	0	12824	0	0	17159	0	0	13578	0	0	13989	0	0	9363.3	0	0	8203	0	0
Q5ASS7	417	Q5ASS7	Q5ASS7		1	56.3592	0.0182711	56.359	20.025	56.359	1	56.3592	0.0182711	56.359		1	H	TEPSTEANKILLSFLHKLSRFLGNATVSPLD	X;X;X;X;X;X;X;X;X;X;X;X;Phospho (STY);X;X;Histidine Methyl (H);X;X;Phospho (STY);X;X;X;X;X;X;X;X;X;X;X;X	XXXXXXXXXPPPPPPPPPPPXXXXXXXXXXX	ILLSFLH(1)KLSR	ILLSFLH(56.36)KLSR	7	4	-0.24725	59971	0	0	18533	0	0	233780	0	0	21931	0	0	9877.5	0	0	38992	0	0	9233	0	0	14782	0	0
C8V8J7	421	C8V8J7	C8V8J7		1	49.6315	0.0181394	49.632	25.377	49.632	1	49.6315	0.0181394	49.632		1	H	DPKVKERQAAVTPEQHNRKSPFPVRIAEQTK	X;X;X;X;X;X;X;X;X;X;X;X;X;X;Deamidation (NQ);Histidine Methyl (H);Deamidation (NQ);X;X;X;X;X;X;X;X;X;X;X;X;X;X	XXXXXXXPPPPPPPPPPPXXXXXXXXXXXXX	QAAVTPEQH(1)NR	QAAVTPEQH(49.63)NR	9	3	4.3632	0	0	0	0	0	0	0	0	0	0	0	0	0	0	0	0	0	0	0	0	0	0	0	0
Q5B6S0	431	Q5B6S0	Q5B6S0		1	40.4964	0.0503696	40.496	15.023	40.496	1	40.4964	0.0503696	40.496		1	H	PRDNGRDMVVYRQENHPNEAQRQMAAHFLSL	X;X;X;X;X;X;X;X;X;X;X;X;Deamidation (NQ);X;Deamidation (NQ);Histidine Methyl (H);X;X;X;X;Deamidation (NQ);X;X;X;X;X;X;X;X;X;X	XXXXXXXXXXXXPPPPPPPPPPXXXXXXXXX	QENH(1)PNEAQR	QENH(40.5)PNEAQR	4	3	0.050035	8279.5	0	0	6179	0	0	6584.3	0	0	9568.7	0	0	4586.7	0	0	6404.4	0	0	4185.5	0	0	4034.6	0	0
Q00667	432	Q00667	Q00667		1	40.552	0.0414248	40.552	11.92	40.552	1	40.552	0.0414248	40.552		1	H	WGLKTCQKVQEEYNEHSWQPLKRHFKDPRKA	X;X;X;X;X;X;X;X;X;X;X;X;X;Deamidation (NQ);X;Histidine Methyl (H);X;X;Deamidation (NQ);X;X;X;X;X;X;X;X;X;X;X;X	XXXXXXXXPPPPPPPPPPPPPPXXXXXXXXX	VQEEYNEH(1)SWQPLK	VQEEYNEH(40.55)SWQPLK	8	4	3.5885	2540.6	0	0	1918.8	0	0	3011.1	0	0	4703.8	0	0	8623.5	0	0	8727.3	0	0	5454.2	0	0	6126.8	0	0
Q5AZ28	432	Q5AZ28	Q5AZ28		1	70.1001	0.0559991	70.1	14.551	70.1	1	70.1001	0.0559991	70.1		1	H	ETAWKQARSRTQPDPHYQGMLKYKEVPMWWY	X;X;X;X;X;X;X;X;X;X;X;X;X;X;X;Histidine Methyl (H);X;Deamidation (NQ);X;X;X;X;X;X;X;X;X;X;X;X;X	XXXXXXXXXXPPPPPPPPPPPPXXXXXXXXX	TQPDPH(1)YQGMLK	TQPDPH(70.1)YQGMLK	6	2	1.9018	18450	0	0	15987	0	0	14082	0	0	24240	0	0	17837	0	0	23013	0	0	11390	0	0	12510	0	0
Q5B8N1	433	Q5B8N1	Q5B8N1		1	74.9616	0.0549276	74.962	24.854	74.962	1	74.9616	0.0549276	74.962		1	H	EKGSIERKQRSRERTHEQVVYTAQNGTRYGV	X;X;X;X;X;X;X;X;X;X;X;X;X;X;X;Histidine Methyl (H);X;X;X;X;X;X;X;X;X;X;X;X;X;X;X	XXXXXXXXXXXXXXPPPPPPPPPPPPPPXXX	TH(1)EQVVYTAQNGTR	TH(74.96)EQVVYTAQNGTR	2	2	1.7861	22227	0	0	24322	0	0	22999	0	0	12928	0	0	1634.2	0	0	2687.8	0	0	1188.4	0	0	2267.9	0	0
C8V1S4	460	C8V1S4	C8V1S4		1	67.4137	0.0181574	67.414	33.325	67.414	1	67.4137	0.0181574	67.414		1	H	VNSDKATSPSYPYRRHETMQAVSRTGTPLNS	X;X;X;X;X;X;X;X;X;X;X;X;X;X;X;Histidine Methyl (H);X;X;Oxidation (M);Deamidation (NQ);X;X;X;X;X;X;X;X;X;X;X	XXXXXXXXXXXXXXXPPPPPPPPPXXXXXXX	H(1)ETMQAVSR	H(67.41)ETMQAVSR	1	3	-2.8595	14477	0	0	8368	0	0	12152	0	0	12153	0	0	11768	0	0	15720	0	0	13053	0	0	13499	0	0
Q5BA75	479	Q5BA75	Q5BA75		1	57.7984	0.00774158	57.798	42.544	57.798	1	57.7984	0.00774158	57.798		1	H	NGLDVNQPQGTMGVQHYERGLMWAETYQSGH	X;X;X;X;X;X;X;X;X;X;X;X;X;X;Deamidation (NQ);Histidine Methyl (H);X;X;X;X;X;X;X;X;X;X;X;X;X;X;X	PPPPPPPPPPPPPPPPPPPXXXXXXXXXXXX	AENGLDVNQPQGTMGVQH(1)YER	AENGLDVNQPQGTMGVQH(57.8)YER	18	4	-2.3145	3196.9	0	0	2195.3	0	0	8335.6	0	0	2421.2	0	0	2274.5	0	0	3286.1	0	0	1884.2	0	0	1969.2	0	0
Q5BDC7	479	Q5BDC7	Q5BDC7		1	42.0307	0.0518498	42.031	13.748	42.031	1	42.0307	0.0518498	42.031		2	H	LEKMGISFETKAPASHHQSTIPRATIPSMSS	X;X;X;X;X;X;X;X;X;X;X;X;X;X;X;Histidine Methyl (H);Histidine Methyl (H);Deamidation (NQ);X;X;X;X;X;X;X;X;X;X;X;X;X	XXXXXXXXXXXPPPPPPPPPPPPXXXXXXXX	APASH(1)H(1)QSTIPR	APASH(42.03)H(42.03)QSTIPR	5	3	-0.84583	0	4604.4	0	0	3236.4	0	0	5541.2	0	0	3851.5	0	0	3383	0	0	3908.7	0	0	2848.5	0	0	3360.6	0
C8VJ63	480	C8VJ63	C8VJ63		1	44.0054	0.03113	44.005	12.585	44.005	1	44.0054	0.03113	44.005		1	H	AGLNSIKVVTDLRHRHAQGQQNAGVSIRSGG	X;X;X;X;X;X;X;X;X;X;X;X;X;X;X;Histidine Methyl (H);X;Deamidation (NQ);X;Deamidation (NQ);X;Deamidation (NQ);X;X;X;X;X;X;Phospho (STY);X;X	XXXXXXXXXXXXXXXPPPPPPPPPPPPPPPP	H(1)AQGQQNAGVSIRSGGVK	H(44.01)AQGQQNAGVSIRSGGVK	1	4	-0.81112	3574.3	0	0	3093.8	0	0	6045.1	0	0	7141.5	0	0	7836.4	0	0	11344	0	0	11798	0	0	13247	0	0
Q5BDC7	480	Q5BDC7	Q5BDC7		1	42.0307	0.0518498	42.031	13.748	42.031	1	42.0307	0.0518498	42.031		2	H	EKMGISFETKAPASHHQSTIPRATIPSMSSN	X;X;X;X;X;X;X;X;X;X;X;X;X;X;Histidine Methyl (H);Histidine Methyl (H);Deamidation (NQ);X;X;X;X;X;X;X;X;X;X;X;X;X;X	XXXXXXXXXXPPPPPPPPPPPPXXXXXXXXX	APASH(1)H(1)QSTIPR	APASH(42.03)H(42.03)QSTIPR	6	3	-0.84583	0	4604.4	0	0	3236.4	0	0	5541.2	0	0	3851.5	0	0	3383	0	0	3908.7	0	0	2848.5	0	0	3360.6	0
C8VIT5	484	C8VIT5	C8VIT5		1	42.109	0.0516388	42.109	7.2848	42.109	1	42.109	0.0516388	42.109		2	H	YPGQSNPEGPQGRQNHNHRGNNRHAHDDGHR	X;X;X;X;X;X;X;X;X;X;X;X;X;X;X;Histidine Methyl (H);X;Histidine Methyl (H);X;X;X;X;X;X;X;X;X;X;X;X;X	XXXXXXXXXXXXXPPPPPPPPPPXXXXXXXX	QNH(1)NH(1)RGNNR	QNH(42.11)NH(42.11)RGNNR	3	2	-2.0983	0	34068	0	0	23756	0	0	31295	0	0	31386	0	0	29905	0	0	37577	0	0	26288	0	0	30201	0
C8VJW6	484	C8VJW6	C8VJW6		1	56.0133	0.0171049	56.013	17.012	56.013	1	56.0133	0.0171049	56.013		1	H	ADLSRLQKEVDDLRGHYENRAAR________	X;X;X;X;X;X;X;X;X;X;X;X;X;X;X;Histidine Methyl (H);Phospho (STY);X;Deamidation (NQ);X;X;X;X;X;X;X;X;X;X;X;X	XXXXXXXXPPPPPPPPPPPPXXXXXXXXXXX	EVDDLRGH(1)YENR	EVDDLRGH(56.01)YENR	8	2	-2.4513	43542	0	0	41730	0	0	40968	0	0	55914	0	0	32232	0	0	53427	0	0	30684	0	0	30820	0	0
C8VIT5	486	C8VIT5	C8VIT5		1	42.109	0.0516388	42.109	7.2848	42.109	1	42.109	0.0516388	42.109		2	H	GQSNPEGPQGRQNHNHRGNNRHAHDDGHRRG	X;X;X;X;X;X;X;X;X;X;X;X;X;Histidine Methyl (H);X;Histidine Methyl (H);X;X;X;X;X;X;X;X;X;X;X;X;X;X;X	XXXXXXXXXXXPPPPPPPPPPXXXXXXXXXX	QNH(1)NH(1)RGNNR	QNH(42.11)NH(42.11)RGNNR	5	2	-2.0983	0	34068	0	0	23756	0	0	31295	0	0	31386	0	0	29905	0	0	37577	0	0	26288	0	0	30201	0
C8VFY6	488	C8VFY6	C8VFY6		1	52.3906	0.0236218	52.391	37.236	52.391	1	52.3906	0.0236218	52.391		1	H	NVDAKNEGDAKESMQHANPSKKGVEREYTII	X;X;X;X;X;X;X;X;X;X;X;X;X;Oxidation (M);X;Histidine Methyl (H);X;Deamidation (NQ);X;Phospho (STY);X;X;X;X;X;X;X;X;X;X;X	XXXXXXXXXXXPPPPPPPPPPPXXXXXXXXX	ESMQH(1)ANPSKK	ESMQH(52.39)ANPSKK	5	4	-0.67489	42391	0	0	43474	0	0	61667	0	0	49376	0	0	46478	0	0	60430	0	0	38930	0	0	46435	0	0
Q5AWK9	502	Q5AWK9	Q5AWK9		1	69.8246	0.0128652	69.825	7.6246	69.825	1	69.8246	0.0128652	69.825		2	H	LSQQHSGDPQTLLRRHCYHLIPSLKLILNII	X;X;X;X;X;X;X;X;X;X;X;X;X;X;X;Histidine Methyl (H);X;Phospho (STY);Histidine Methyl (H);X;X;X;X;X;X;X;X;X;X;X;X	XXXXXXXXXXXXXXXPPPPPPPPPPXXXXXX	H(1)CYH(1)LIPSLK	H(69.82)CYH(69.82)LIPSLK	1	2	-4.3937	0	11380	0	0	9441.6	0	0	13851	0	0	12852	0	0	8604.3	0	0	10062	0	0	6858.9	0	0	6982.4	0
Q5BAY0	502	Q5BAY0	Q5BAY0		1	57.4919	0.0400969	57.492	10.886	57.492	1	57.4919	0.0400969	57.492		1	H	ERFYMPVRGTVLLDGHDIKDLNLRWLRQQIS	X;X;X;X;X;X;X;X;X;X;X;X;X;X;X;Histidine Methyl (H);X;X;X;X;X;X;X;X;X;X;X;X;X;X;X	XXXXXXXXPPPPPPPPPPPXXXXXXXXXXXX	GTVLLDGH(1)DIK	GTVLLDGH(57.49)DIK	8	4	-3.0793	22121	0	0	19295	0	0	32813	0	0	22045	0	0	20140	0	0	19482	0	0	12998	0	0	13996	0	0
Q5B4C1	503	Q5B4C1	Q5B4C1		1	49.0967	0.030375	49.097	7.2207	49.097	1	49.0967	0.030375	49.097		1	H	EQISAANKDIGFKTIHISERNRPDIDMYIES	X;X;X;X;X;X;X;X;X;X;X;X;X;Phospho (STY);X;Histidine Methyl (H);X;Phospho (STY);X;X;Deamidation (NQ);X;X;X;X;X;X;X;X;X;X	XXXXXXXXXXXXXPPPPPPPPPXXXXXXXXX	TIH(1)ISERNR	TIH(49.1)ISERNR	3	2	0.0030802	21908	0	0	22930	0	0	60036	0	0	26079	0	0	1300.3	0	0	5075.1	0	0	2533.1	0	0	3164.6	0	0
C8VS22	504	C8VS22	C8VS22		1	46.3002	0.0220737	46.3	8.7498	46.3	1	46.3002	0.0220737	46.3		1	H	DVYLKNGHFCLDQDKHAVNPSRSAKDASKGI	X;X;X;X;X;X;X;X;X;X;X;X;X;X;X;Histidine Methyl (H);X;X;X;X;X;X;Phospho (STY);X;X;X;X;X;X;X;X	XXXXXXXXXXXXXXXPPPPPPPPPPPPPPXX	H(1)AVNPSRSAKDASK	H(46.3)AVNPSRSAKDASK	1	4	-0.8037	72391	0	0	18369	0	0	282450	0	0	21137	0	0	5104.9	0	0	46461	0	0	7272.4	0	0	14419	0	0
Q5AWK9	505	Q5AWK9	Q5AWK9		1	69.8246	0.0128652	69.825	7.6246	69.825	1	69.8246	0.0128652	69.825		2	H	QHSGDPQTLLRRHCYHLIPSLKLILNIISGV	X;X;X;X;X;X;X;X;X;X;X;X;Histidine Methyl (H);X;Phospho (STY);Histidine Methyl (H);X;X;X;X;X;X;X;X;X;X;X;X;X;X;X	XXXXXXXXXXXXPPPPPPPPPPXXXXXXXXX	H(1)CYH(1)LIPSLK	H(69.82)CYH(69.82)LIPSLK	4	2	-4.3937	0	11380	0	0	9441.6	0	0	13851	0	0	12852	0	0	8604.3	0	0	10062	0	0	6858.9	0	0	6982.4	0
C8V333	519	C8V333	C8V333		1	98.5231	0.031065	98.523	51.174	98.523	1	98.5231	0.031065	98.523		1	H	PPQGEIWIRGGSVSTHYFKNEEETKAAYAEG	X;X;X;X;X;X;X;X;X;X;X;X;X;X;X;Histidine Methyl (H);X;X;X;X;X;X;X;X;X;X;X;X;X;X;X	XXXXXXXXXPPPPPPPPPPXXXXXXXXXXXX	GGSVSTH(1)YFK	GGSVSTH(98.52)YFK	7	2	0.55411	44844	0	0	39026	0	0	28742	0	0	35308	0	0	35484	0	0	46295	0	0	21065	0	0	27879	0	0
Q5B5I8	522	Q5B5I8	Q5B5I8		1	43.5122	0.0385537	43.512	11.183	43.512	1	43.5122	0.0385537	43.512		1	H	ETDLKKAYRKLAIKYHPDKNREGEAGDEKFK	X;X;X;X;X;X;X;X;X;X;X;X;X;X;Phospho (STY);Histidine Methyl (H);X;X;X;X;X;X;X;X;X;X;X;X;X;X;X	XXXXXXXXXXPPPPPPPPPXXXXXXXXXXXX	LAIKYH(1)PDK	LAIKYH(43.51)PDK	6	5	-1.5251	16731	0	0	9554.9	0	0	30940	0	0	11726	0	0	8634.5	0	0	11793	0	0	5277.9	0	0	6882	0	0
Q5BDK7	527	Q5BDK7	Q5BDK7		1	49.5946	0.0278311	49.595	40.113	49.595	1	49.5946	0.0278311	49.595		1	H	HVPLCMLLERALDLAHTYPELDNIANRERLG	X;X;X;X;X;X;X;X;X;X;X;X;X;X;X;Histidine Methyl (H);Phospho (STY);X;X;X;X;X;Deamidation (NQ);X;X;X;X;X;X;X;X	XXXXXXXXXXPPPPPPPPPPPPPPPPPXXXX	ALDLAH(1)TYPELDNIANR	ALDLAH(49.59)TYPELDNIANR	6	3	-3.652	75787	0	0	77846	0	0	189350	0	0	137850	0	0	58441	0	0	102240	0	0	52023	0	0	58596	0	0
C8VBI2	535	C8VBI2	C8VBI2		1	42.5986	0.051661	42.599	10.664	42.599	1	42.5986	0.051661	42.599		1	H	DVAARVKKRFPQASNHLRRLDRLFEQYDKDH	X;X;X;X;X;X;X;X;X;X;X;Deamidation (NQ);X;Phospho (STY);X;Histidine Methyl (H);X;X;X;X;X;X;X;X;X;X;X;X;X;X;X	XXXXXXXXXPPPPPPPPPPXXXXXXXXXXXX	FPQASNH(1)LRR	FPQASNH(42.6)LRR	7	2	-0.68054	444.34	0	0	475.34	0	0	1303.7	0	0	850.65	0	0	936.59	0	0	1146	0	0	1242.3	0	0	2406.1	0	0
Q5ATP6	540	Q5ATP6	Q5ATP6		1	57.0193	0.0249822	57.019	23.334	57.019	1	57.0193	0.0249822	57.019		1	H	DPQLHRALVDDDLRKHSKKRRRVQRGVTLLG	X;X;X;X;X;X;X;X;X;X;X;X;X;X;X;Histidine Methyl (H);Phospho (STY);X;X;X;X;X;X;X;X;X;X;X;X;X;X	XXXXXXPPPPPPPPPPPPXXXXXXXXXXXXX	ALVDDDLRKH(1)SK	ALVDDDLRKH(57.02)SK	10	3	1.7562	133940	0	0	116300	0	0	169020	0	0	230890	0	0	108580	0	0	140090	0	0	85271	0	0	90391	0	0
Q5AZE6	543	Q5AZE6	Q5AZE6		1	48.1115	0.0266994	48.112	6.0434	48.112	1	48.1115	0.0266994	48.112		1	H	TLRWKDNMLANAKSLHSKRPKYRITDLSRTM	X;X;X;X;X;X;X;X;X;X;X;X;X;Phospho (STY);X;Histidine Methyl (H);Phospho (STY);X;X;X;X;X;X;X;X;X;X;X;X;X;X	XXXXXPPPPPPPPPPPPPPXXXXXXXXXXXX	DNMLANAKSLH(1)SKR	DNMLANAKSLH(48.11)SKR	11	3	-3.2653	22692	0	0	24829	0	0	31433	0	0	31651	0	0	17224	0	0	32035	0	0	16756	0	0	18884	0	0
Q5BGC4	554	Q5BGC4	Q5BGC4		1	48.5679	0.0270007	48.568	14.474	48.568	1	48.5679	0.0270007	48.568		1	H	NLLKDIPSWLRSLRLHKYTDNLKDLKWTELI	X;X;X;X;X;X;X;X;X;X;X;X;X;X;X;Histidine Methyl (H);X;Phospho (STY);Phospho (STY);X;Deamidation (NQ);X;X;X;X;X;X;X;X;X;X	XXXXXXXXXXXPPPPPPPPPPPPXXXXXXXX	SLRLH(1)KYTDNLK	SLRLH(48.57)KYTDNLK	5	3	0.52844	8548.6	0	0	6135.4	0	0	16436	0	0	6248.9	0	0	16222	0	0	11982	0	0	10622	0	0	16274	0	0
Q5BC96	563	Q5BC96	Q5BC96		1	47.6028	0.031145	47.603	6.2033	47.603	1	47.6028	0.031145	47.603		2	H	ASACATLDFALRVLTHHSYLRRTILICRTGM	X;X;X;X;X;X;X;X;X;X;X;X;X;X;X;Histidine Methyl (H);Histidine Methyl (H);Phospho (STY);X;X;X;X;X;X;X;X;X;X;X;X;X	XXXXXXXXXXXXPPPPPPPPPPXXXXXXXXX	VLTH(1)H(1)SYLRR	VLTH(47.6)H(47.6)SYLRR	4	2	-1.7151	0	7093.3	0	0	4822.1	0	0	7629.5	0	0	10154	0	0	7808.6	0	0	10371	0	0	6107.4	0	0	7005.3	0
Q5BC96	564	Q5BC96	Q5BC96		1	47.6028	0.031145	47.603	6.2033	47.603	1	47.6028	0.031145	47.603		2	H	SACATLDFALRVLTHHSYLRRTILICRTGML	X;X;X;X;X;X;X;X;X;X;X;X;X;X;Histidine Methyl (H);Histidine Methyl (H);Phospho (STY);X;X;X;X;X;X;X;X;X;X;X;X;X;X	XXXXXXXXXXXPPPPPPPPPPXXXXXXXXXX	VLTH(1)H(1)SYLRR	VLTH(47.6)H(47.6)SYLRR	5	2	-1.7151	0	7093.3	0	0	4822.1	0	0	7629.5	0	0	10154	0	0	7808.6	0	0	10371	0	0	6107.4	0	0	7005.3	0
H9D0P5	571	H9D0P5	H9D0P5		1	179.21	0.000137881	179.21	163.52	179.21	1	179.21	0.000137881	179.21		1	H	NNSSLEWCLTSPPKPHAFASLPLQS______	X;X;X;X;X;X;X;X;X;X;X;X;X;X;X;Histidine Methyl (H);X;X;X;X;X;X;X;Deamidation (NQ);X;X;X;X;X;X;X	XXXXXXXXXXXXXXPPPPPPPPPPPXXXXXX	PH(1)AFASLPLQS	PH(179.21)AFASLPLQS	2	2	-0.83748	11132	0	0	8412.4	0	0	9565.9	0	0	9606.2	0	0	9364	0	0	10785	0	0	6482.4	0	0	6644.9	0	0
Q5BEC4	573	Q5BEC4	Q5BEC4		1	83.647	0.0103813	83.647	11.404	83.647	1	83.647	0.0103813	83.647		2	H	RFYLGRHCKKNAALAHTLTHWRFHLNEWVVE	X;X;X;X;X;X;X;X;X;X;X;X;X;X;X;Histidine Methyl (H);Phospho (STY);X;X;Histidine Methyl (H);X;X;X;X;X;X;X;X;X;X;X	XXXXXXXXXXPPPPPPPPPPPPXXXXXXXXX	NAALAH(1)TLTH(1)WR	NAALAH(83.65)TLTH(83.65)WR	6	2	-4.1577	0	51145	0	0	59809	0	0	19644	0	0	118260	0	0	5060.5	0	0	7754.8	0	0	4545.6	0	0	5245.4	0
Q5BEC4	577	Q5BEC4	Q5BEC4		1	83.647	0.0103813	83.647	11.404	83.647	1	83.647	0.0103813	83.647		2	H	GRHCKKNAALAHTLTHWRFHLNEWVVEHLRT	X;X;X;X;X;X;X;X;X;X;X;Histidine Methyl (H);Phospho (STY);X;X;Histidine Methyl (H);X;X;X;X;X;X;X;X;X;X;X;X;X;X;X	XXXXXXPPPPPPPPPPPPXXXXXXXXXXXXX	NAALAH(1)TLTH(1)WR	NAALAH(83.65)TLTH(83.65)WR	10	2	-4.1577	0	51145	0	0	59809	0	0	19644	0	0	118260	0	0	5060.5	0	0	7754.8	0	0	4545.6	0	0	5245.4	0
Q5AZC6	588	Q5AZC6	Q5AZC6		1	48.8834	0.0180286	48.883	34.27	48.883	1	48.8834	0.0180286	48.883		1	H	KKPYIEKPDSTDEMVHNKEALKEFADKCWDI	X;X;X;X;X;X;X;X;X;X;X;X;X;X;X;Histidine Methyl (H);Deamidation (NQ);X;X;X;X;X;X;X;X;X;X;X;X;X;X	XPPPPPPPPPPPPPPPPPXXXXXXXXXXXXX	KPYIEKPDSTDEMVH(1)NK	KPYIEKPDSTDEMVH(48.88)NK	15	5	-4.2579	14236	0	0	13362	0	0	29476	0	0	15868	0	0	15194	0	0	17769	0	0	11986	0	0	15618	0	0
Q5B1U9	613	Q5B1U9	Q5B1U9		0.540697	0	0.0082511	69.729	34.4	69.729	0.540697	0	0.0082511	69.729		1	H	NIQPIIIRKTYCPHKHSQLHQVDGELERPKV	X;X;X;X;X;X;X;X;X;X;X;X;X;X;X;Histidine Methyl (H);X;Deamidation (NQ);X;X;X;X;X;X;X;X;X;X;X;X;X	XXXXXXXXXXXXXXXPPPPPPPPPPPPPPPX	H(0.541)SQLH(0.459)QVDGELERPK	H(0)SQLH(0)QVDGELERPK	1	3	-1.3103	57505	0	0	44866	0	0	103370	0	0	30651	0	0	5188.7	0	0	7137	0	0	7008.2	0	0	5973.4	0	0
Q5B1U9	617	Q5B1U9	Q5B1U9		0.459303	0	0.0082511	69.729	34.4	69.729	0.459303	0	0.0082511	69.729			H	IIIRKTYCPHKHSQLHQVDGELERPKVPPPI	X;X;X;X;X;X;X;X;X;X;X;X;X;X;X;X;X;X;X;X;X;X;X;X;X;X;X;X;X;X;X	XXXXXXXXXXXXXXXXXXXXXXXXXXXXXXX	H(0.541)SQLH(0.459)QVDGELERPK	H(0)SQLH(0)QVDGELERPK	5	3	-1.3103	0	0	0	0	0	0	0	0	0	0	0	0	0	0	0	0	0	0	0	0	0	0	0	0
Q96V54	642	Q96V54	Q96V54		1	55.0637	0.0284789	55.064	26.957	55.064	1	55.0637	0.0284789	55.064		1	H	LEASKVSKEDEDRRNHAENGTSKKNAGGLGR	X;X;X;X;X;X;X;X;X;X;X;X;X;X;Deamidation (NQ);Histidine Methyl (H);X;X;Deamidation (NQ);X;X;X;X;X;X;X;X;X;X;X;X	XXXXXXXXXXXXXXPPPPPPPPPXXXXXXXX	NH(1)AENGTSK	NH(55.06)AENGTSK	2	3	0.037696	9139.2	0	0	5473.2	0	0	11725	0	0	5717	0	0	8325.1	0	0	6621.2	0	0	3994.3	0	0	12313	0	0
C8VCZ2	649	C8VCZ2	C8VCZ2		0.999892	41.3361	7.92629e-05	78.236	59.988	78.236	0.999892	41.3361	7.92629e-05	78.236		1	H	TITEQHEPSSVPSLDHQETNMLLGKYPLLEF	X;X;X;X;X;X;X;X;X;X;X;X;X;X;X;Histidine Methyl (H);Deamidation (NQ);X;X;Deamidation (NQ);X;X;X;X;X;X;X;X;X;X;X	PPPPPPPPPPPPPPPPPPPPPPPPPXXXXXX	TTITEQHEPSSVPSLDH(1)QETNMLLGK	TTITEQH(-41.34)EPSSVPSLDH(41.34)QETNMLLGK	17	4	3.0225	17154	0	0	11316	0	0	41233	0	0	15997	0	0	19250	0	0	20164	0	0	20557	0	0	19390	0	0
Q5AXF8	652	Q5AXF8	Q5AXF8		1	45.8629	0.0260132	45.863	21.325	45.863	1	45.8629	0.0260132	45.863		1	H	RNYLKPDAFAINSGKHSSMSKREAFTPVFSP	X;X;X;X;X;X;X;X;X;X;X;X;X;X;X;Histidine Methyl (H);X;X;Oxidation (M);X;X;X;X;X;X;X;X;X;X;X;X	XXXXXPPPPPPPPPPPPPPPPXXXXXXXXXX	PDAFAINSGKH(1)SSMSK	PDAFAINSGKH(45.86)SSMSK	11	5	2.0593	22785	0	0	6181.8	0	0	107040	0	0	8219.4	0	0	6532.5	0	0	10636	0	0	3532.1	0	0	4714.6	0	0
Q5ARQ5	655	Q5ARQ5	Q5ARQ5		1	68.7347	0.00931072	68.735	25.453	68.735	1	68.7347	0.00931072	68.735		1	H	SHDRSMFPRLIGQSDHTVAQKENLPSSPNGL	X;X;X;X;X;X;X;X;X;X;X;X;Deamidation (NQ);Phospho (STY);X;Histidine Methyl (H);Phospho (STY);X;X;X;X;X;X;X;X;X;X;X;X;X;X	XXXXXXXXXPPPPPPPPPPPPXXXXXXXXXX	LIGQSDH(1)TVAQK	LIGQSDH(68.73)TVAQK	7	2	-3.5636	6547.4	0	0	9557.6	0	0	7456.4	0	0	9972.9	0	0	6443.4	0	0	10263	0	0	5097.8	0	0	8388.6	0	0
Q5B1T9	658	Q5B1T9	Q5B1T9		1	71.5551	0.0111155	71.555	15.196	71.555	1	71.5551	0.0111155	71.555		1	H	DKVTIWIPSTKPTKDHQDISEPLDARSAGGS	X;X;X;X;X;X;X;X;X;X;X;X;X;X;X;Histidine Methyl (H);X;X;X;X;X;X;X;X;X;X;X;X;X;X;X	XXXXXXXXXXXXXXPPPPPPPPPPPPXXXXX	DH(1)QDISEPLDAR	DH(71.56)QDISEPLDAR	2	4	-2.9791	11027	0	0	8807.8	0	0	17867	0	0	7009.2	0	0	11225	0	0	12651	0	0	5417.2	0	0	9590.5	0	0
Q5B5W4	671	Q5B5W4	Q5B5W4		1	46.3622	0.0184045	46.362	22.445	46.362	1	46.3622	0.0184045	46.362		1	H	DGDASKVQRAILGIAHEYPDYYPPQLKIQDA	X;X;X;X;X;X;X;Deamidation (NQ);X;X;X;X;X;X;X;Histidine Methyl (H);X;Phospho (STY);X;X;X;X;X;X;X;X;X;X;X;X;X	XXXXXXPPPPPPPPPPPPPPPPPPPPPXXXX	VQRAILGIAH(1)EYPDYYPPQLK	VQRAILGIAH(46.36)EYPDYYPPQLK	10	3	-4.0614	10417	0	0	11254	0	0	19557	0	0	12569	0	0	8434.8	0	0	12949	0	0	8340.6	0	0	8428.1	0	0
Q5BBL8	671	Q5BBL8	Q5BBL8		1	141.552	3.91456e-46	245.69	211.42	141.55	1	141.552	3.91456e-46	245.69		1	H	YGSAPPTEEDDDEYGHDEL____________	X;X;X;X;X;X;X;X;X;X;X;X;X;X;X;Histidine Methyl (H);X;X;X;X;X;X;X;X;X;X;X;X;X;X;X	PPPPPPPPPPPPPPPPPPPXXXXXXXXXXXX	LYGSAPPTEEDDDEYGH(1)DEL	LYGSAPPTEEDDDEYGH(141.55)DEL	17	3	-0.048868	21782	0	0	14576	0	0	23245	0	0	36136	0	0	12145	0	0	10252	0	0	8846.1	0	0	9071.5	0	0
C8UZY3	680	C8UZY3	C8UZY3		1	76.8465	0.0149489	76.847	36.578	76.847	1	76.8465	0.0149489	76.847		1	H	LSSAWLDQSKILGWRHKSTDRRLELWKRRAW	X;X;X;X;X;X;X;X;X;X;X;X;X;X;X;Histidine Methyl (H);X;Phospho (STY);Phospho (STY);X;X;X;X;X;X;X;X;X;X;X;X	XXXXXXXXXXXXXXXPPPPPPPXXXXXXXXX	H(1)KSTDRR	H(76.85)KSTDRR	1	2	-0.59321	2527.6	0	0	1958.2	0	0	3333	0	0	3981.7	0	0	23417	0	0	39418	0	0	16435	0	0	16229	0	0
C8V9U0	686	C8V9U0	C8V9U0		1	51.2181	0.0141266	55.314	8.1248	51.218	1	51.2181	0.0141266	55.314		1	H	CAFQYKKLLTSIRVYHNGKLHGMEFLYEDAT	X;X;X;X;X;X;X;X;X;Phospho (STY);X;X;X;X;Phospho (STY);Histidine Methyl (H);Deamidation (NQ);X;X;X;X;X;X;X;X;X;X;X;X;X;X	XXXXXXPPPPPPPPPPPPPXXXXXXXXXXXX	KLLTSIRVYH(1)NGK	KLLTSIRVYH(51.22)NGK	10	4	3.0622	706660	0	0	483980	0	0	457430	0	0	276350	0	0	63843	0	0	72766	0	0	31763	0	0	43734	0	0
Q5B7D4	697	Q5B7D4	Q5B7D4		1	84.4756	0.0205953	84.476	20.178	84.476	1	84.4756	0.0205953	84.476		1	H	PAVDALPSTPPAKRQHCPLPDRETTTLSQAV	X;X;X;X;X;X;X;X;X;X;X;X;X;X;Deamidation (NQ);Histidine Methyl (H);X;X;X;X;X;X;X;X;X;X;X;X;X;X;X	XXXXXXXXXXXXXPPPPPPPPPXXXXXXXXX	RQH(1)CPLPDR	RQH(84.48)CPLPDR	3	2	-3.7838	40959	0	0	23982	0	0	69597	0	0	47420	0	0	56613	0	0	74569	0	0	45006	0	0	41968	0	0
Q5AVK2	705	Q5AVK2	Q5AVK2		1	56.7293	0.043542	56.729	14.334	56.729	1	56.7293	0.043542	56.729		1	H	PYVSYALPKSNSEYNHLRQKPSADYSSRISQ	X;X;X;X;X;X;X;X;X;X;X;X;X;X;Deamidation (NQ);Histidine Methyl (H);X;X;Deamidation (NQ);X;X;X;X;X;X;X;X;X;X;X;X	XXXXXXXXXPPPPPPPPPPPXXXXXXXXXXX	SNSEYNH(1)LRQK	SNSEYNH(56.73)LRQK	7	2	1.8473	71871	0	0	48873	0	0	39538	0	0	73036	0	0	4878.2	0	0	8527.6	0	0	3118.1	0	0	3280.3	0	0
Q5B6C3	711	Q5B6C3	Q5B6C3		1	45.2567	0.0177944	45.257	20.107	45.257	1	45.2567	0.0177944	45.257		1	H	KKSPDLRLSISDVTAHIPGTSDMQNRQKVKD	X;X;X;X;X;X;X;X;X;X;Phospho (STY);X;X;Phospho (STY);X;Histidine Methyl (H);X;X;X;X;X;X;X;X;X;X;X;X;X;X;X	XXXXXXXPPPPPPPPPPPPPPPPPPPPPXXX	LSISDVTAH(1)IPGTSDMQNRQK	LSISDVTAH(45.26)IPGTSDMQNRQK	9	4	-3.9522	6844.9	0	0	5598.1	0	0	12866	0	0	6361.3	0	0	5082.2	0	0	6616.4	0	0	3832.1	0	0	4841.3	0	0
Q5BBT5	718	Q5BBT5	Q5BBT5		0.999985	48.3082	0.0200032	71.379	16.667	71.379	0.999985	48.3082	0.0200032	71.379		1	H	KADLERPSIHSASRLHSDLDHKRRRAVSASS	X;X;X;X;X;X;X;X;X;X;X;X;X;X;X;Histidine Methyl (H);X;X;X;X;X;X;X;X;X;X;X;X;X;X;X	XXXXXXXXXXXXXXPPPPPPPPXXXXXXXXX	LH(1)SDLDHK	LH(48.31)SDLDH(-48.31)K	2	4	-1.2468	5288.4	0	0	3038.7	0	0	12400	0	0	13290	0	0	16574	0	0	19269	0	0	11710	0	0	15662	0	0
Q5BF83	720	Q5BF83	Q5BF83		1	50.9659	0.0344252	50.966	32.235	50.966	1	50.9659	0.0344252	50.966		1	H	LNEQELKAIEDEVDRHARALPRMDIVRGSLA	X;X;X;X;X;X;X;X;X;X;X;X;X;X;X;Histidine Methyl (H);X;X;X;X;X;X;X;X;X;X;X;X;X;X;X	XXXXXXXXXXXXXXXPPPPPPPXXXXXXXXX	H(1)ARALPR	H(50.97)ARALPR	1	3	-1.9402	0	0	0	0	0	0	0	0	0	0	0	0	0	0	0	0	0	0	0	0	0	0	0	0
Q5ART7	721	Q5ART7	Q5ART7		1	78.1127	0.00677383	78.113	38.808	78.113	1	78.1127	0.00677383	78.113		1	H	HANAQQRAFDKQSAAHQKHFEKQNAALAAQY	X;X;X;X;X;X;X;X;X;X;X;Deamidation (NQ);X;X;X;Histidine Methyl (H);Deamidation (NQ);X;X;X;X;X;X;X;X;X;X;X;X;X;X	XXXXXXXPPPPPPPPPPPXXXXXXXXXXXXX	AFDKQSAAH(1)QK	AFDKQSAAH(78.11)QK	9	2	-0.17623	48381	0	0	46057	0	0	34152	0	0	53207	0	0	18048	0	0	20928	0	0	14589	0	0	14444	0	0
Q5B7Z7	721	Q5B7Z7	Q5B7Z7		1	87.8065	0.0145411	87.806	60.477	87.806	1	87.8065	0.0145411	87.806		1	H	RFIQQKGRPVMLEQRHSGREWLPLKVHLEQR	X;X;X;X;X;X;X;X;X;X;X;X;X;Deamidation (NQ);X;Histidine Methyl (H);X;X;X;X;X;X;X;X;X;X;X;X;X;X;X	XXXXXXPPPPPPPPPPPPPXXXXXXXXXXXX	GRPVMLEQRH(1)SGR	GRPVMLEQRH(87.81)SGR	10	2	-2.4714	11520	0	0	14846	0	0	14340	0	0	20595	0	0	10393	0	0	12759	0	0	17094	0	0	19729	0	0
Q5BAX2	727	Q5BAX2	Q5BAX2		1	95.6204	0.00890127	111.28	42.88	95.62	1	95.6204	0.00890127	111.28		1	H	MEIFKKMGPRVILVEHRGRLTGLVTVKDCLK	X;X;X;X;X;X;X;X;X;X;X;X;X;X;X;Histidine Methyl (H);X;X;X;X;X;X;X;X;X;X;X;X;X;X;X	XXXXXXXXXXPPPPPPPXXXXXXXXXXXXXX	VILVEH(1)R	VILVEH(95.62)R	6	3	-0.51734	8390.9	0	0	8229.8	0	0	12715	0	0	10933	0	0	10006	0	0	12372	0	0	8425.4	0	0	9055.6	0	0
C8VQL3	752	C8VQL3	C8VQL3		1	55.5671	0.0274899	55.567	16.263	55.567	1	55.5671	0.0274899	55.567		1	H	VPVLSKRLLNVLQPLHDTRNRHMAESLVHSN	X;X;X;X;X;X;X;X;X;Deamidation (NQ);X;X;Deamidation (NQ);X;X;Histidine Methyl (H);X;Phospho (STY);X;X;X;X;X;X;X;X;X;X;X;X;X	XXXXXXXPPPPPPPPPPPPXXXXXXXXXXXX	LLNVLQPLH(1)DTR	LLNVLQPLH(55.57)DTR	9	2	3.8802	12202	0	0	13992	0	0	15272	0	0	3880.2	0	0	1530.2	0	0	1279.7	0	0	1209.1	0	0	1120.3	0	0
Q5AX77	753	Q5AX77	Q5AX77		0.539897	0.694628	0.0344987	42.095	14.599	42.095	0.539897	0.694628	0.0344987	42.095		1	H	MQVVRSLLELWKETGHKTLLFAQHRIMLDIL	X;X;X;X;X;X;X;X;X;X;X;X;X;X;X;Histidine Methyl (H);X;Phospho (STY);X;X;X;X;X;X;X;X;X;X;X;X;X	XXXXXXXXXXXXPPPPPPPPPPPPPXXXXXX	ETGH(0.54)KTLLFAQH(0.46)R	ETGH(0.69)KTLLFAQH(-0.69)R	4	5	-1.8893	4015.4	0	0	3660.6	0	0	7955	0	0	2884.9	0	0	2460.3	0	0	3028.5	0	0	2324.8	0	0	2887.4	0	0
C8VA01	784	C8VA01	C8VA01		1	45.7179	0.0356749	45.718	25.931	45.718	1	45.7179	0.0356749	45.718		1	H	QTAYTHFRAIPEKIRHQEAKKEAQDASIAKI	X;X;X;X;X;X;X;X;X;X;X;X;X;X;X;Histidine Methyl (H);Deamidation (NQ);X;X;X;X;X;X;X;X;X;X;X;X;X;X	XXXXXXXXXXXXXPPPPPPPXXXXXXXXXXX	IRH(1)QEAK	IRH(45.72)QEAK	3	3	-3.3038	0	0	0	0	0	0	0	0	0	0	0	0	0	0	0	0	0	0	0	0	0	0	0	0
Q5AQZ4	790	Q5AQZ4	Q5AQZ4		0.999603	34.0138	0.0554293	47.067	28.395	47.067	0.999603	34.0138	0.0554293	47.067		1	H	SPYIDGQTAARITFKHVHIKSRSTLSIVGIP	X;X;X;X;X;X;X;X;X;X;X;X;X;X;X;Histidine Methyl (H);X;X;X;X;Phospho (STY);X;X;X;X;X;X;X;X;X;X	XXXXXXXXXXXXXXXPPPPPPPXXXXXXXXX	H(1)VHIKSR	H(34.01)VH(-34.01)IKSR	1	4	-2.5909	12254	0	0	10333	0	0	15491	0	0	9569.9	0	0	12179	0	0	15450	0	0	7711.7	0	0	9676.1	0	0
C8V1D8	798	C8V1D8	C8V1D8		0.989174	19.5525	0.0339024	47.201	7.9825	47.201	0.989174	19.5525	0.0339024	47.201		2	H	KVEKHPNLRIGYIKQHALEHVEMHLEKTPSQ	X;X;X;X;X;X;X;X;X;X;X;X;X;X;Deamidation (NQ);Histidine Methyl (H);X;X;X;Histidine Methyl (H);X;X;X;X;X;X;X;X;X;X;X	XXXXXXXXXXXXXXPPPPPPPPPPPPPXXXX	QH(0.989)ALEH(0.987)VEMH(0.023)LEK	QH(19.55)ALEH(18.9)VEMH(-18.9)LEK	2	4	0.63743	0	21064	0	0	17685	0	0	21315	0	0	27139	0	0	48718	0	0	51512	0	0	30735	0	0	46459	0
C8V1D8	802	C8V1D8	C8V1D8		0.987431	18.9043	0.0339024	47.201	7.9825	47.201	0.987431	18.9043	0.0339024	47.201		2	H	HPNLRIGYIKQHALEHVEMHLEKTPSQYLQW	X;X;X;X;X;X;X;X;X;X;Deamidation (NQ);Histidine Methyl (H);X;X;X;Histidine Methyl (H);X;X;X;X;X;X;X;X;X;X;X;X;X;X;X	XXXXXXXXXXPPPPPPPPPPPPPXXXXXXXX	QH(0.989)ALEH(0.987)VEMH(0.023)LEK	QH(19.55)ALEH(18.9)VEMH(-18.9)LEK	6	4	0.63743	0	21064	0	0	17685	0	0	21315	0	0	27139	0	0	48718	0	0	51512	0	0	30735	0	0	46459	0
Q5ASA5	805	Q5ASA5	Q5ASA5		0.5	0	0.0294636	48.44	18.002	48.44	0.5	0	0.0294636	48.44		1	H	VKKFCKEFFDKAVAKHQAHEKRKAEKLAKEG	X;X;X;X;X;X;X;X;X;X;X;X;X;X;X;Histidine Methyl (H);X;X;X;X;X;X;X;X;X;X;X;X;X;X;X	XXXXXXXXXXXPPPPPPPPPPPXXXXXXXXX	AVAKH(0.5)QAH(0.5)EKR	AVAKH(0)QAH(0)EKR	5	3	1.7746	0	0	0	0	0	0	0	0	0	0	0	0	0	0	0	0	0	0	0	0	0	0	0	0
Q5ASA5	808	Q5ASA5	Q5ASA5		0.5	0	0.0294636	48.44	18.002	48.44	0.5	0	0.0294636	48.44		1	H	FCKEFFDKAVAKHQAHEKRKAEKLAKEGSSD	X;X;X;X;X;X;X;X;X;X;X;X;X;X;X;X;X;X;X;X;X;X;X;X;X;X;X;X;X;X;X	XXXXXXXXXXXXXXXXXXXXXXXXXXXXXXX	AVAKH(0.5)QAH(0.5)EKR	AVAKH(0)QAH(0)EKR	8	3	1.7746	0	0	0	0	0	0	0	0	0	0	0	0	0	0	0	0	0	0	0	0	0	0	0	0
Q5AXV5	818	Q5AXV5	Q5AXV5		1	52.1723	0.015223	52.172	33.577	52.172	1	52.1723	0.015223	52.172		1	H	KLETVTQELFDLRMQHENTLNDYEALEAKYE	X;X;X;X;X;X;X;X;X;X;X;X;X;X;Deamidation (NQ);Histidine Methyl (H);X;Deamidation (NQ);X;X;X;X;X;X;X;X;X;X;X;X;X	XXXXXXXXXXXXXPPPPPPPPPPPPPPPPXX	MQH(1)ENTLNDYEALEAK	MQH(52.17)ENTLNDYEALEAK	3	4	4.4016	14377	0	0	11165	0	0	21667	0	0	13874	0	0	15058	0	0	13691	0	0	11590	0	0	11150	0	0
Q5BBC6	840	Q5BBC6	Q5BBC6		1	40.0015	0.0481302	40.002	15.847	40.002	1	40.0015	0.0481302	40.002		1	H	WTQGVFEFRYHHNGKHNVMAISRPFEVRIPR	X;X;X;X;X;X;X;X;X;X;X;X;X;X;X;Histidine Methyl (H);Deamidation (NQ);X;Oxidation (M);X;X;X;X;X;X;X;X;X;X;X;X	XXXXXXXXXXXXXXXPPPPPPPPXXXXXXXX	H(1)NVMAISR	H(40)NVMAISR	1	3	-3.4674	7726.5	0	0	8074.7	0	0	14709	0	0	8719.2	0	0	12089	0	0	16522	0	0	10747	0	0	14192	0	0
Q5BGV0	856	Q5BGV0	Q5BGV0		1	56.7293	0.0511616	56.729	30.056	56.729	1	56.7293	0.0511616	56.729		1	H	VIPITDEDAWLDEKNHIVWNVEKGVPPIFEE	X;X;X;X;X;X;X;X;X;X;X;X;X;X;Deamidation (NQ);Histidine Methyl (H);X;X;X;X;X;X;X;X;X;X;X;X;X;X;X	XXXXXXXXXXXXXXPPPPPPPPPXXXXXXXX	NH(1)IVWNVEK	NH(56.73)IVWNVEK	2	4	-3.4892	10499	0	0	7763.8	0	0	9107.3	0	0	9709	0	0	2941.1	0	0	5338.7	0	0	3479.7	0	0	2709.9	0	0
Q5B1U2	861	Q5B1U2	Q5B1U2		0.999993	51.632	0.0209414	63.48	34.753	63.48	0.999993	51.632	0.0209414	63.48		1	H	GGSAAGFRLQRLLMPHEHKESIIPWQATWVR	X;X;X;X;X;X;X;X;X;X;X;X;X;Oxidation (M);X;Histidine Methyl (H);X;X;X;X;X;X;X;X;X;X;X;X;X;X;X	XXXXXXXXXXXPPPPPPPPXXXXXXXXXXXX	LLMPH(1)EHK	LLMPH(51.63)EH(-51.63)K	5	4	1.3661	125200	0	0	116970	0	0	112340	0	0	151810	0	0	111890	0	0	137220	0	0	68314	0	0	94380	0	0
Q5BF98	922	Q5BF98	Q5BF98		1	59.2612	0.0116917	59.261	20.844	59.261	1	59.2612	0.0116917	59.261		1	H	AKDIRDELNMIRMVLHYQKNVLDDFHEVVGE	X;X;X;X;X;X;X;X;Deamidation (NQ);X;X;X;X;X;X;Histidine Methyl (H);Phospho (STY);X;X;X;X;X;X;X;X;X;X;X;X;X;X	XXPPPPPPPPPPPPPPPPPXXXXXXXXXXXX	DIRDELNMIRMVLH(1)YQK	DIRDELNMIRMVLH(59.26)YQK	14	3	-2.827	30043	0	0	32248	0	0	128640	0	0	9138.4	0	0	1196.6	0	0	1001.1	0	0	375.03	0	0	691.24	0	0
Q5BGR5	1210	Q5BGR5	Q5BGR5		1	58.3699	0.0201401	58.37	6.6077	58.37	1	58.3699	0.0201401	58.37		1	H	VKAYCYATTASDKSIHRQQIEKEAPVFYDAS	X;X;X;X;X;X;X;X;X;X;X;X;X;Phospho (STY);X;Histidine Methyl (H);X;Deamidation (NQ);Deamidation (NQ);X;X;X;X;X;X;X;X;X;X;X;X	XXXXXXXXXXXXXPPPPPPPPPXXXXXXXXX	SIH(1)RQQIEK	SIH(58.37)RQQIEK	3	3	2.5585	12248	0	0	9815.2	0	0	13948	0	0	14936	0	0	6804.1	0	0	8614.1	0	0	6928.8	0	0	5848.7	0	0
Q5ARK1	1263	Q5ARK1	Q5ARK1		1	40.552	0.039243	40.552	9.8682	40.552	1	40.552	0.039243	40.552		1	H	SVLAVPGGRRAKSIMHSRNLGTMKKAKAEKW	X;X;X;X;X;X;X;X;X;X;X;X;X;X;X;Histidine Methyl (H);X;X;X;X;X;Phospho (STY);Oxidation (M);X;X;X;X;X;X;X;X	XXXXXXXXXXXXPPPPPPPPPPPPPXXXXXX	SIMH(1)SRNLGTMKK	SIMH(40.55)SRNLGTMKK	4	4	-2.1301	38885	0	0	22839	0	0	40086	0	0	27237	0	0	10585	0	0	13729	0	0	7781.2	0	0	8550.3	0	0
Q5BB86	1302	Q5BB86	Q5BB86		1	72.2335	0.0453722	72.234	9.5163	72.234	1	72.2335	0.0453722	72.234		1	H	GAGDEYKVWAQALREHTNMRKAFSSINRWLD	X;X;X;X;X;X;X;X;X;X;X;X;X;X;X;Histidine Methyl (H);X;Deamidation (NQ);X;X;X;X;X;X;X;X;X;X;X;X;X	XXXXXXXXXXXXXXPPPPPPPXXXXXXXXXX	EH(1)TNMRK	EH(72.23)TNMRK	2	2	3.7361	17358	0	0	14609	0	0	20711	0	0	32768	0	0	117830	0	0	136710	0	0	77122	0	0	119500	0	0
Q5BCI4	1310	Q5BCI4	Q5BCI4		1	44.5871	0.0286456	57.989	25.439	44.587	1	44.5871	0.0286456	57.989		1	H	QDHITSSILRLLRVLHGMNTTLDDILAETKD	X;X;X;X;X;X;X;X;X;X;X;X;X;X;X;Histidine Methyl (H);X;X;X;Phospho (STY);X;X;X;X;X;X;X;X;X;X;X	XXXXXXXXXXPPPPPPPPPPPPPPPPPPPPX	LLRVLH(1)GMNTTLDDILAETK	LLRVLH(44.59)GMNTTLDDILAETK	6	4	3.3547	473610	0	0	487670	0	0	170670	0	0	478610	0	0	17457	0	0	41262	0	0	15088	0	0	27413	0	0
Q5B4Q8	1324	Q5B4Q8	Q5B4Q8		1	45.3069	0.0294641	45.307	22.814	45.307	1	45.3069	0.0294641	45.307		1	H	NMPLEQVKQLTTERLHQYQQQQQQRMSQVAM	X;X;X;X;X;X;X;X;X;X;X;X;X;X;X;Histidine Methyl (H);Deamidation (NQ);X;X;X;X;X;X;X;X;X;X;X;X;X;X	XXXXXXXXXXXXXXPPPPPPPPPPPXXXXXX	LH(1)QYQQQQQQR	LH(45.31)QYQQQQQQR	2	3	-3.7203	0	0	0	0	0	0	0	0	0	0	0	0	0	0	0	0	0	0	0	0	0	0	0	0
Q03149	1487	Q03149	Q03149		1	45.4342	0.0243123	45.434	12.439	45.434	1	45.4342	0.0243123	45.434		2	H	DENYQSIREVILDSEHHEATALVKFQAPQAN	X;X;X;X;X;X;X;X;X;X;X;X;X;Phospho (STY);X;Histidine Methyl (H);Histidine Methyl (H);X;X;Phospho (STY);X;X;X;X;X;X;X;X;X;X;X	XXXXXXXXPPPPPPPPPPPPPPPPXXXXXXX	EVILDSEH(1)H(1)EATALVK	EVILDSEH(45.43)H(45.43)EATALVK	8	3	2.2821	0	22437	0	0	18634	0	0	1876.4	0	0	32500	0	0	2370.2	0	0	2250.7	0	0	1253.6	0	0	1784	0
Q03149	1488	Q03149	Q03149		1	45.4342	0.0243123	45.434	12.439	45.434	1	45.4342	0.0243123	45.434		2	H	ENYQSIREVILDSEHHEATALVKFQAPQANF	X;X;X;X;X;X;X;X;X;X;X;X;Phospho (STY);X;Histidine Methyl (H);Histidine Methyl (H);X;X;Phospho (STY);X;X;X;X;X;X;X;X;X;X;X;X	XXXXXXXPPPPPPPPPPPPPPPPXXXXXXXX	EVILDSEH(1)H(1)EATALVK	EVILDSEH(45.43)H(45.43)EATALVK	9	3	2.2821	0	22437	0	0	18634	0	0	1876.4	0	0	32500	0	0	2370.2	0	0	2250.7	0	0	1253.6	0	0	1784	0
Q5B6A7	1807	Q5B6A7	Q5B6A7		1	49.4231	0.0332198	49.423	6.6345	49.423	1	49.4231	0.0332198	49.423		1	H	ECSLALLPVLDIDVRHLVQMCYVAEIVKVAT	X;X;X;X;X;X;X;X;X;X;X;X;X;X;X;Histidine Methyl (H);X;X;X;X;X;Phospho (STY);X;X;X;X;X;X;X;X;X	XXXXXXXXXXXXXXXPPPPPPPPPPPPPXXX	H(1)LVQMCYVAEIVK	H(49.42)LVQMCYVAEIVK	1	4	3.7714	3267.3	0	0	2657.8	0	0	6057.7	0	0	4395.6	0	0	32354	0	0	54959	0	0	8477.6	0	0	36075	0	0
C8VB89	1851	C8VB89	C8VB89		1	70.9771	0.0116455	70.977	37.752	70.977	1	70.9771	0.0116455	70.977		1	H	KLHNRWEKAHYYLGKHYNKILDSEKSKPLGK	X;X;X;X;X;X;X;X;X;X;X;X;X;X;X;Histidine Methyl (H);Phospho (STY);Deamidation (NQ);X;X;X;X;X;X;X;X;X;X;X;X;X	XXXXXXXXXXXXXXXPPPPPPPPPPXXXXXX	H(1)YNKILDSEK	H(70.98)YNKILDSEK	1	3	-3.7704	51718	0	0	18506	0	0	237440	0	0	22780	0	0	10419	0	0	31987	0	0	8115.5	0	0	13092	0	0
Q5AWT4	2104	Q5AWT4	Q5AWT4		0.5	0	0.0343077	47.288	17.815	47.288	0.5	0	0.0343077	47.288		1	H	MQNKNVSVTEELILRHVDHMISERTNREAKQ	X;X;X;X;X;X;X;X;X;X;X;X;X;X;X;Histidine Methyl (H);X;X;X;Oxidation (M);X;Phospho (STY);X;X;X;X;X;X;X;X;X	XXXXXXXXXXXXXXXPPPPPPPPPPPPXXXX	H(0.5)VDH(0.5)MISERTNR	H(0)VDH(0)MISERTNR	1	3	-3.8487	16858	0	0	13519	0	0	26188	0	0	20123	0	0	23059	0	0	44283	0	0	14511	0	0	18213	0	0
Q5AWT4	2107	Q5AWT4	Q5AWT4		0.5	0	0.0343077	47.288	17.815	47.288	0.5	0	0.0343077	47.288		1	H	KNVSVTEELILRHVDHMISERTNREAKQSAL	X;X;X;X;X;X;X;X;X;X;X;X;X;X;X;X;X;X;X;X;X;X;X;X;X;X;X;X;X;X;X	XXXXXXXXXXXXXXXXXXXXXXXXXXXXXXX	H(0.5)VDH(0.5)MISERTNR	H(0)VDH(0)MISERTNR	4	3	-3.8487	16858	0	0	13519	0	0	26188	0	0	20123	0	0	23059	0	0	44283	0	0	14511	0	0	18213	0	0
Q5B027;Q5B1W7	1;1	Q5B027;Q5B1W7	Q5B027		1	97.8134	0.00590269	97.813	80.428	97.813	1	97.8134	0.00590269	97.813		1	H	_______________HGYLTVPASRTRLGFE	X;X;X;X;X;X;X;X;X;X;X;X;X;X;X;Histidine Methyl (H);X;X;X;X;X;X;X;X;X;X;X;X;X;X;X	XXXXXXXXXXXXXXXPPPPPPPPPPXXXXXX	H(1)GYLTVPASR	H(97.81)GYLTVPASR	1	3	0.17558	40837	0	0	25062	0	0	62669	0	0	35446	0	0	47617	0	0	55592	0	0	36564	0	0	57870	0	0
[truncated: 209 more columns]

## Sheet: Deep
Proteins	Positions within proteins	Leading proteins	Protein	Fasta headers	Localization prob	Score diff	PEP	Score	Delta score	Score for localization	Localization prob Aspergillus Mix	Score diff Aspergillus Mix	PEP Aspergillus Mix	Score Aspergillus Mix	Diagnostic peak	Number of Histidine Methyl (H)	Amino acid	Sequence window	Modification window	Peptide window coverage	Histidine Methyl (H) Probabilities	Histidine Methyl (H) Score diffs	Position in peptide	Charge	Mass error [ppm]	Intensity	Intensity___1	Intensity___2	Intensity___3	Ratio mod/base	Intensity Aspergillus Mix	Ratio mod/base Aspergillus Mix	Intensity Aspergillus Mix___1	Intensity Aspergillus Mix___2	Intensity Aspergillus Mix___3	Occupancy Aspergillus Mix	Occupancy ratioAspergillus Mix	Occupancy error scale Aspergillus Mix	Reverse	Potential contaminant	id	Protein group IDs	Positions	Position	Peptide IDs	Mod. peptide IDs	Evidence IDs	MS/MS IDs	Best localization evidence ID
C8V530	1	C8V530	C8V530	tr|C8V530|C8V530_EMENI Uncharacterized protein OS=Emericella nidulans (strain FGSC A4 / ATCC 38163 / CBS 112.46 / NRRL 194 / M139) OX=227321 GN=ANIA_10419 PE=4 SV=1	1	102.52	1.2845e-32	242.48	214.3	102.52	1	102.52	1.2845e-32	242.48		1	H	_______________HGYVSNIVINGVSYRG	X;X;X;X;X;X;X;X;X;X;X;X;X;X;X;Histidine Methyl (H);X;X;X;X;X;X;X;X;X;X;X;X;X;X;X	XXXXXXXXXXXXXXXPPPPPPPPPPPPPPPX	H(1)GYVSNIVINGVSYR	H(102.52)GYVSNIVINGVSYR	1	3	-0.031841	185950000	185950000	0	0	NaN	149590000	NaN	149590000	0	0						5	384	1	1	26100	29727	75700;75701;75702;75703;75704;75705;75706	92583;92584;92585;92586;92587;92588;92589;92590	75706
Q5AU55	1	Q5AU55	Q5AU55	tr|Q5AU55|Q5AU55_EMENI Uncharacterized protein OS=Emericella nidulans (strain FGSC A4 / ATCC 38163 / CBS 112.46 / NRRL 194 / M139) OX=227321 GN=ANIA_08175 PE=4 SV=1	1	47.0619	0.0176587	47.062	43.342	47.062	1	47.0619	0.0176587	47.062		1	H	_______________HMVMTNPVPYNFKSWD	X;X;X;X;X;X;X;X;X;X;X;X;X;X;X;Histidine Methyl (H);Oxidation (M);X;Oxidation (M);X;X;X;X;X;X;X;X;X;X;X;X	XXXXXXXXXXXXXXXPPPPPPPPPPPPPXXX	H(1)MVMTNPVPYNFK	H(47.06)MVMTNPVPYNFK	1	3	0.61847	4437700	4437700	0	0	NaN	4437700	NaN	4437700	0	0						45	2945	1	1	26628	30354	78270	95843	78270
Q5B428	1	Q5B428	Q5B428	tr|Q5B428|Q5B428_EMENI Uncharacterized protein OS=Emericella nidulans (strain FGSC A4 / ATCC 38163 / CBS 112.46 / NRRL 194 / M139) OX=227321 GN=ANIA_04702 PE=4 SV=1	1	61.1614	1.46868e-19	244.76	194.93	61.161	1	61.1614	1.46868e-19	244.76		1	H	_______________HTVIVYPGYRGNNLHT	X;X;X;X;X;X;X;X;X;X;X;X;X;X;X;Histidine Methyl (H);X;X;X;X;X;X;X;X;X;X;X;X;X;X;X	XXXXXXXXXXXXXXXPPPPPPPPPPXXXXXX	H(1)TVIVYPGYR	H(61.16)TVIVYPGYR	1	3	-0.45513	6946400000	6946400000	0	0	128.2	3247400000	59.935	3247400000	0	0						69	4589	1	1	27174	30960	80084;80085;80086;80087;80088;80089;80090;80091;80092;80093;80094;80095;80096;80097;80098;80099	98071;98072;98073;98074;98075;98076;98077;98078;98079;98080;98081;98082;98083;98084;98085;98086;98087;98088;98089;98090	80099
Q5AT42	4	Q5AT42	Q5AT42	tr|Q5AT42|Q5AT42_EMENI Amino acid transporter (Eurofung) OS=Emericella nidulans (strain FGSC A4 / ATCC 38163 / CBS 112.46 / NRRL 194 / M139) OX=227321 GN=ANIA_08538 PE=4 SV=1	1	51.9267	0.00593274	51.927	27.583	51.927	1	51.9267	0.00593274	51.927		1	H	____________MSDHGDTAPLLGEQRQPEY	X;X;X;X;X;X;X;X;X;X;X;X;Oxidation (M);X;X;Histidine Methyl (H);X;X;X;X;X;X;X;X;X;X;X;X;X;X;X	XXXXXXXXXXXXPPPPPPPPPPPPPPPXXXX	MSDH(1)GDTAPLLGEQR	MSDH(51.93)GDTAPLLGEQR	4	2	2.3785	4859200	4859200	0	0	NaN	4859200	NaN	4859200	0	0						41	2803	4	4	45049	51914	137357	168186	137357
Q5B4S5	4	Q5B4S5	Q5B4S5	tr|Q5B4S5|Q5B4S5_EMENI Uncharacterized protein OS=Emericella nidulans (strain FGSC A4 / ATCC 38163 / CBS 112.46 / NRRL 194 / M139) OX=227321 GN=ANIA_04455 PE=4 SV=1	1	47.8938	0.00863745	47.894	21.776	47.894	1	47.8938	0.00863745	47.894		1	H	____________MSRHTPPTDTLGKESDRTR	X;X;X;X;X;X;X;X;X;X;X;X;X;X;X;Histidine Methyl (H);X;X;X;X;X;X;X;X;X;X;X;X;X;X;X	XXXXXXXXXXXXXPPPPPPPPPPPPPPPPXX	SRH(1)TPPTDTLGKESDR	SRH(47.89)TPPTDTLGKESDR	3	2	-1.4997	179340000	179340000	0	0	NaN	179340000	NaN	179340000	0	0						71	4728	4	4	60094	69268	181440;181441	220714;220715	181441
Q5B6V6	4	Q5B6V6	Q5B6V6	tr|Q5B6V6|Q5B6V6_EMENI Uncharacterized protein OS=Emericella nidulans (strain FGSC A4 / ATCC 38163 / CBS 112.46 / NRRL 194 / M139) OX=227321 GN=ANIA_03724 PE=4 SV=1	0.995621	23.5672	0.0124045	50.353	10.505	50.353	0.995621	23.5672	0.0124045	50.353		1	H	____________MLHHAREQTIEGFKAREAM	X;X;X;X;X;X;X;X;X;X;X;X;X;X;X;Histidine Methyl (H);X;X;X;X;Phospho (STY);X;X;X;X;X;X;X;X;X;X	XXXXXXXXXXXXPPPPPPPPPPPPPPXXXXX	MLH(0.004)H(0.996)AREQTIEGFK	MLH(-23.57)H(23.57)AREQTIEGFK	4	2	-0.070581	56798000	56798000	0	0	NaN	56798000	NaN	56798000	0	0						81	5112	4	4	44498	50945	134850	165103	134850
Q5B9L6	5	Q5B9L6	Q5B9L6	sp|Q5B9L6|FEN1_EMENI Flap endonuclease 1 OS=Emericella nidulans (strain FGSC A4 / ATCC 38163 / CBS 112.46 / NRRL 194 / M139) OX=227321 GN=fen1 PE=3 SV=1	1	46.1784	0.000922967	46.178	34.923	46.178	1	46.1784	0.000922967	46.178		1	H	___________MGIKHLYQVIAENAPDAIKA	X;X;X;X;X;X;X;X;X;X;X;Oxidation (M);X;X;X;Histidine Methyl (H);X;Phospho (STY);X;X;X;X;X;X;X;X;X;X;X;X;X	XXXXXXXXXXXPPPPPPPPPPPPPPPPPPPP	MGIKH(1)LYQVIAENAPDAIKAGDIK	MGIKH(46.18)LYQVIAENAPDAIKAGDIK	5	4	1.1807	34454000	34454000	0	0	NaN	34454000	NaN	34454000	0	0						88	5538	5	5	44146	50323	133179	163090	133179
Q5AV19	6	Q5AV19	Q5AV19	tr|Q5AV19|Q5AV19_EMENI Uncharacterized protein OS=Emericella nidulans (strain FGSC A4 / ATCC 38163 / CBS 112.46 / NRRL 194 / M139) OX=227321 GN=ANIA_07861 PE=4 SV=1	1	50.1945	0.0058192	50.284	19.412	50.194	1	50.1945	0.0058192	50.284		2	H	__________VSTDKHDSEGHSKGYRHIQDA	X;X;X;X;X;X;X;X;X;X;X;X;X;X;X;Histidine Methyl (H);X;X;X;X;Histidine Methyl (H);X;X;X;X;X;X;X;X;X;X	XXXXXXXXXXPPPPPPPPPPPPPPPPXXXXX	VSTDKH(1)DSEGH(1)SKGYR	VSTDKH(50.19)DSEGH(50.19)SKGYR	6	2	-1.1154	54500000	0	54500000	0	NaN	54500000	NaN	0	54500000	0						46	3089	6	6	71770	82736	218627;218628	266275;266276	218628
Q5B5N1	7	Q5B5N1	Q5B5N1	tr|Q5B5N1|Q5B5N1_EMENI Uncharacterized protein OS=Emericella nidulans (strain FGSC A4 / ATCC 38163 / CBS 112.46 / NRRL 194 / M139) OX=227321 GN=ANIA_04149 PE=4 SV=1	0.5	0	0.0189441	43.628	10.219	43.628	0.5	0	0.0189441	43.628		1	H	_________IPGRETHHLLAPYARISRKFQV	X;X;X;X;X;X;X;X;X;X;X;X;X;X;Phospho (STY);Histidine Methyl (H);X;X;X;X;X;X;X;X;X;X;X;X;X;X;X	XXXXXXXXXPPPPPPPPPPPPPPPXXXXXXX	IPGRETH(0.5)H(0.5)LLAPYAR	IPGRETH(0)H(0)LLAPYAR	7	2	-0.56825	77829000	77829000	0	0	NaN	77829000	NaN	77829000	0	0						73	4896	7	7	30786	35058	92431	113556	92431
Q5BGG5	7	Q5BGG5	Q5BGG5	tr|Q5BGG5|Q5BGG5_EMENI Uncharacterized protein OS=Emericella nidulans (strain FGSC A4 / ATCC 38163 / CBS 112.46 / NRRL 194 / M139) OX=227321 GN=ANIA_00365 PE=4 SV=1	1	48.0533	0.0194332	48.053	21.689	48.053	1	48.0533	0.0194332	48.053		1	H	_________MTRNISHGRGGAGNIFSSEAPK	X;X;X;X;X;X;X;X;X;X;X;X;X;X;X;Histidine Methyl (H);X;X;X;X;X;X;X;X;X;X;X;X;X;X;X	XXXXXXXXXXXXPPPPPPPPPPPPPPPPPPP	NISH(1)GRGGAGNIFSSEAPK	NISH(48.05)GRGGAGNIFSSEAPK	4	3	-0.38983	8984300	8984300	0	0	NaN	8984300	NaN	8984300	0	0						109	6767	7	7	46734	54077	142980	174992	142980
Q5BH03	7	Q5BH03	Q5BH03	tr|Q5BH03|Q5BH03_EMENI Uncharacterized protein OS=Emericella nidulans (strain FGSC A4 / ATCC 38163 / CBS 112.46 / NRRL 194 / M139) OX=227321 GN=ANIA_00177 PE=4 SV=1	0.666667	0	0.0189502	40.589	22.177	40.589	0.666667	0	0.0189502	40.589		2	H	_________MSLSTPHDHHILTIKYRVHTES	X;X;X;X;X;X;X;X;X;Oxidation (M);X;X;Phospho (STY);X;X;Histidine Methyl (H);X;Histidine Methyl (H);X;X;X;X;X;X;X;X;X;X;X;X;X	XXXXXXXXXPPPPPPPPPPPPPPPXXXXXXX	MSLSTPH(0.667)DH(0.667)H(0.667)ILTIK	MSLSTPH(0)DH(0)H(0)ILTIK	7	2	-1.5776	7776600	0	7776600	0	NaN	7776600	NaN	0	7776600	0						112	6860	7	7	45094	51995	137595	168491	137595
Q5B5N1	8	Q5B5N1	Q5B5N1	tr|Q5B5N1|Q5B5N1_EMENI Uncharacterized protein OS=Emericella nidulans (strain FGSC A4 / ATCC 38163 / CBS 112.46 / NRRL 194 / M139) OX=227321 GN=ANIA_04149 PE=4 SV=1	0.5	0	0.0189441	43.628	10.219	43.628	0.5	0	0.0189441	43.628		1	H	________IPGRETHHLLAPYARISRKFQVA	X;X;X;X;X;X;X;X;X;X;X;X;X;X;X;X;X;X;X;X;X;X;X;X;X;X;X;X;X;X;X	XXXXXXXXXXXXXXXXXXXXXXXXXXXXXXX	IPGRETH(0.5)H(0.5)LLAPYAR	IPGRETH(0)H(0)LLAPYAR	8	2	-0.56825	77829000	77829000	0	0	NaN	77829000	NaN	77829000	0	0						74	4896	8	8	30786	35058	92431	113556	92431
Q5AYC6	9	Q5AYC6	Q5AYC6	tr|Q5AYC6|Q5AYC6_EMENI Uncharacterized protein OS=Emericella nidulans (strain FGSC A4 / ATCC 38163 / CBS 112.46 / NRRL 194 / M139) OX=227321 GN=ANIA_06704 PE=4 SV=1	0.998412	27.9853	0.0157767	42.802	14.938	42.802	0.998412	27.9853	0.0157767	42.802		1	H	_______MESNNLKGHSKHDNKDDSTPETSD	X;X;X;X;X;X;X;Oxidation (M);X;X;X;X;X;X;X;Histidine Methyl (H);X;X;X;X;X;X;X;X;X;X;X;X;X;X;X	XXXXXXXPPPPPPPPPPPPPPPXXXXXXXXX	MESNNLKGH(0.998)SKH(0.002)DNK	MESNNLKGH(27.99)SKH(-27.99)DNK	9	2	3.8761	8239600	8239600	0	0	NaN	8239600	NaN	8239600	0	0						57	3595	9	9	43945	49976	132351	162087	132351
Q5BH03	9	Q5BH03	Q5BH03	tr|Q5BH03|Q5BH03_EMENI Uncharacterized protein OS=Emericella nidulans (strain FGSC A4 / ATCC 38163 / CBS 112.46 / NRRL 194 / M139) OX=227321 GN=ANIA_00177 PE=4 SV=1	0.666667	0	0.0189502	40.589	22.177	40.589	0.666667	0	0.0189502	40.589		2	H	_______MSLSTPHDHHILTIKYRVHTESPT	X;X;X;X;X;X;X;Oxidation (M);X;X;Phospho (STY);X;X;Histidine Methyl (H);X;Histidine Methyl (H);X;X;X;X;X;X;X;X;X;X;X;X;X;X;X	XXXXXXXPPPPPPPPPPPPPPPXXXXXXXXX	MSLSTPH(0.667)DH(0.667)H(0.667)ILTIK	MSLSTPH(0)DH(0)H(0)ILTIK	9	2	-1.5776	7776600	0	7776600	0	NaN	7776600	NaN	0	7776600	0						113	6860	9	9	45094	51995	137595	168491	137595
Q5BB64	10	Q5BB64	Q5BB64	tr|Q5BB64|Q5BB64_EMENI Uncharacterized protein OS=Emericella nidulans (strain FGSC A4 / ATCC 38163 / CBS 112.46 / NRRL 194 / M139) OX=227321 GN=ANIA_02216 PE=4 SV=1	1	44.8635	0.0127672	44.863	18.191	44.863	1	44.8635	0.0127672	44.863		2	H	______METAPLTLAHTHARNAALETRKSNP	X;X;X;X;X;X;Oxidation (M);X;X;X;X;X;Phospho (STY);X;X;Histidine Methyl (H);Phospho (STY);Histidine Methyl (H);X;X;X;X;X;X;X;X;X;X;X;X;X	XXXXXXXPPPPPPPPPPPPPXXXXXXXXXXX	ETAPLTLAH(1)TH(1)AR	ETAPLTLAH(44.86)TH(44.86)AR	9	2	0.76167	40373000	0	40373000	0	NaN	40373000	NaN	0	40373000	0						95	5800	10	10	15914	18144	46566	56449	46566
Q5BH03	10	Q5BH03	Q5BH03	tr|Q5BH03|Q5BH03_EMENI Uncharacterized protein OS=Emericella nidulans (strain FGSC A4 / ATCC 38163 / CBS 112.46 / NRRL 194 / M139) OX=227321 GN=ANIA_00177 PE=4 SV=1	0.666667	0	0.0189502	40.589	22.177	40.589	0.666667	0	0.0189502	40.589		2	H	______MSLSTPHDHHILTIKYRVHTESPTI	X;X;X;X;X;X;X;X;X;X;X;X;X;X;X;X;X;X;X;X;X;X;X;X;X;X;X;X;X;X;X	XXXXXXXXXXXXXXXXXXXXXXXXXXXXXXX	MSLSTPH(0.667)DH(0.667)H(0.667)ILTIK	MSLSTPH(0)DH(0)H(0)ILTIK	10	2	-1.5776	7776600	0	7776600	0	NaN	7776600	NaN	0	7776600	0						114	6860	10	10	45094	51995	137595	168491	137595
Q5AV19	11	Q5AV19	Q5AV19	tr|Q5AV19|Q5AV19_EMENI Uncharacterized protein OS=Emericella nidulans (strain FGSC A4 / ATCC 38163 / CBS 112.46 / NRRL 194 / M139) OX=227321 GN=ANIA_07861 PE=4 SV=1	1	50.1945	0.0058192	50.284	19.412	50.194	1	50.1945	0.0058192	50.284		2	H	_____VSTDKHDSEGHSKGYRHIQDASTGRI	X;X;X;X;X;X;X;X;X;X;Histidine Methyl (H);X;X;X;X;Histidine Methyl (H);X;X;X;X;X;X;X;X;X;X;X;X;X;X;X	XXXXXPPPPPPPPPPPPPPPPXXXXXXXXXX	VSTDKH(1)DSEGH(1)SKGYR	VSTDKH(50.19)DSEGH(50.19)SKGYR	11	2	-1.1154	54500000	0	54500000	0	NaN	54500000	NaN	0	54500000	0						47	3089	11	11	71770	82736	218627;218628	266275;266276	218628
Q5B9V2	11	Q5B9V2	Q5B9V2	tr|Q5B9V2|Q5B9V2_EMENI Uncharacterized protein OS=Emericella nidulans (strain FGSC A4 / ATCC 38163 / CBS 112.46 / NRRL 194 / M139) OX=227321 GN=ANIA_02678 PE=4 SV=1	1	50.1945	0.0134456	50.194	29.988	50.194	1	50.1945	0.0134456	50.194			H	_____MSPSTPSSDSHIHSEKSTQSETDLIV	X;X;X;X;X;X;X;X;X;Phospho (STY);X;X;X;X;X;Histidine Methyl (H);X;Histidine Methyl (H);X;X;X;X;X;X;X;X;X;X;X;X;X	XXXXXXPPPPPPPPPPPPPPPXXXXXXXXXX	SPSTPSSDSH(1)IH(1)SEK	SPSTPSSDSH(50.19)IH(50.19)SEK	10	2	1.8018	46982000	0	46982000	0	NaN	46982000	NaN	0	46982000	0						90	5575	11	11	59705	68822	180422	219533	180422
Q5BB64	12	Q5BB64	Q5BB64	tr|Q5BB64|Q5BB64_EMENI Uncharacterized protein OS=Emericella nidulans (strain FGSC A4 / ATCC 38163 / CBS 112.46 / NRRL 194 / M139) OX=227321 GN=ANIA_02216 PE=4 SV=1	1	44.8635	0.0127672	44.863	18.191	44.863	1	44.8635	0.0127672	44.863		2	H	____METAPLTLAHTHARNAALETRKSNPVA	X;X;X;X;Oxidation (M);X;X;X;X;X;Phospho (STY);X;X;Histidine Methyl (H);Phospho (STY);Histidine Methyl (H);X;X;X;X;X;X;X;X;X;X;X;X;X;X;X	XXXXXPPPPPPPPPPPPPXXXXXXXXXXXXX	ETAPLTLAH(1)TH(1)AR	ETAPLTLAH(44.86)TH(44.86)AR	11	2	0.76167	40373000	0	40373000	0	NaN	40373000	NaN	0	40373000	0						96	5800	12	12	15914	18144	46566	56449	46566
G5EB06	13	G5EB06	G5EB06	tr|G5EB06|G5EB06_EMENI Uncharacterized protein OS=Emericella nidulans (strain FGSC A4 / ATCC 38163 / CBS 112.46 / NRRL 194 / M139) OX=227321 GN=ANIA_02919 PE=4 SV=1	1	42.8024	0.0122958	42.802	12.454	42.802	1	42.8024	0.0122958	42.802		1	H	___MSPAQDSESIKAHPRRRPFRAARPSLVP	X;X;X;X;X;X;X;X;X;Phospho (STY);X;Phospho (STY);X;X;X;Histidine Methyl (H);X;X;X;X;X;X;X;X;X;X;X;X;X;X;X	XXXXPPPPPPPPPPPPPPPXXXXXXXXXXXX	SPAQDSESIKAH(1)PRR	SPAQDSESIKAH(42.8)PRR	12	2	-0.95	175120000	175120000	0	0	NaN	175120000	NaN	175120000	0	0						26	2157	13	13	59357	68408	179549	218500	179549
Q5B164	13	Q5B164	Q5B164	tr|Q5B164|Q5B164_EMENI CBS and PB1 domain protein (AFU_orthologue AFUA_1G06780) OS=Emericella nidulans (strain FGSC A4 / ATCC 38163 / CBS 112.46 / NRRL 194 / M139) OX=227321 GN=ANIA_05716 PE=4 SV=1	1	45.1154	0.0181263	45.115	33.139	45.115	1	45.1154	0.0181263	45.115		1	H	___MSSTPTFRGTTSHRTVGRGRLPDFEGGS	X;X;X;X;X;X;X;X;X;X;X;X;X;X;X;Histidine Methyl (H);X;X;X;X;X;X;X;X;X;X;X;X;X;X;X	XXXXPPPPPPPPPPPPPXXXXXXXXXXXXXX	SSTPTFRGTTSH(1)R	SSTPTFRGTTSH(45.12)R	12	3	-0.031791	80382000	80382000	0	0	NaN	80382000	NaN	80382000	0	0						67	4110	13	13	60718	69997	183063	222635	183063
Q5B9V2	13	Q5B9V2	Q5B9V2	tr|Q5B9V2|Q5B9V2_EMENI Uncharacterized protein OS=Emericella nidulans (strain FGSC A4 / ATCC 38163 / CBS 112.46 / NRRL 194 / M139) OX=227321 GN=ANIA_02678 PE=4 SV=1	1	50.1945	0.0134456	50.194	29.988	50.194	1	50.1945	0.0134456	50.194			H	___MSPSTPSSDSHIHSEKSTQSETDLIVSA	X;X;X;X;X;X;X;Phospho (STY);X;X;X;X;X;Histidine Methyl (H);X;Histidine Methyl (H);X;X;X;X;X;X;X;X;X;X;X;X;X;X;X	XXXXPPPPPPPPPPPPPPPXXXXXXXXXXXX	SPSTPSSDSH(1)IH(1)SEK	SPSTPSSDSH(50.19)IH(50.19)SEK	12	2	1.8018	46982000	0	46982000	0	NaN	46982000	NaN	0	46982000	0						91	5575	13	13	59705	68822	180422	219533	180422
C8V0D4	27	C8V0D4	C8V0D4	tr|C8V0D4|C8V0D4_EMENI Cytochrome P450, putative (Eurofung) OS=Emericella nidulans (strain FGSC A4 / ATCC 38163 / CBS 112.46 / NRRL 194 / M139) OX=227321 GN=ANIA_06449 PE=3 SV=1	1	51.2649	0.00752917	51.265	24.136	51.265	1	51.2649	0.00752917	51.265		1	H	FVVSVYFFRVRLRLSHIPGPFLASLTNINRR	X;X;X;X;X;X;X;X;X;X;X;X;X;X;Phospho (STY);Histidine Methyl (H);X;X;X;X;X;X;X;X;X;X;X;X;X;X;X	XXXXXXXXXXXXXPPPPPPPPPPPPPPPPPP	LSH(1)IPGPFLASLTNINRR	LSH(51.26)IPGPFLASLTNINRR	3	3	-1.4356	249340000	249340000	0	0	NaN	249340000	NaN	249340000	0	0						0	56	27	27	41386	46858	124509	152565	124509
Q5AWM2	33	Q5AWM2	Q5AWM2	tr|Q5AWM2|Q5AWM2_EMENI Uncharacterized protein OS=Emericella nidulans (strain FGSC A4 / ATCC 38163 / CBS 112.46 / NRRL 194 / M139) OX=227321 GN=ANIA_07308 PE=4 SV=1	0.99855	30.0871	0.00991357	49.298	23.168	49.298	0.99855	30.0871	0.00991357	49.298		1	H	RRTVTYRSLGRALRVHSTLAKQMLYEFHLNE	X;X;X;X;X;X;X;X;X;X;X;X;X;X;X;Histidine Methyl (H);Phospho (STY);X;X;X;X;X;X;X;Phospho (STY);X;X;X;X;X;X	XXXXXXXXXXXXXXPPPPPPPPPPPPPPPPP	VH(0.999)STLAKQMLYEFH(0.001)LNENSK	VH(30.09)STLAKQMLYEFH(-30.09)LNENSK	2	2	-1.5853	9739200	9739200	0	0	NaN	9739200	NaN	9739200	0	0						50	3345	33	33	69130	79678	209904	255573	209904
Q5B135	44	Q5B135	Q5B135	sp|Q5B135|ENO_EMENI Enolase OS=Emericella nidulans (strain FGSC A4 / ATCC 38163 / CBS 112.46 / NRRL 194 / M139) OX=227321 GN=enoA PE=1 SV=1	1	94.8816	4.11827e-05	94.882	83.506	94.882	1	94.8816	4.11827e-05	94.882		2	H	GLHRAIVPSGASTGQHEAHELRDGDKSKWLG	X;X;X;X;X;X;X;X;X;X;X;X;X;X;X;Histidine Methyl (H);X;X;Histidine Methyl (H);X;X;X;X;X;X;X;X;X;X;X;X	XXXXPPPPPPPPPPPPPPPPPPXXXXXXXXX	AIVPSGASTGQH(1)EAH(1)ELR	AIVPSGASTGQH(94.88)EAH(94.88)ELR	12	4	0.26198	20595000	0	20595000	0	0.00047124	20595000	0.00047124	0	20595000	0						65	4089	44	44	3153	3557	9578	11595	9578
Q5B135	47	Q5B135	Q5B135	sp|Q5B135|ENO_EMENI Enolase OS=Emericella nidulans (strain FGSC A4 / ATCC 38163 / CBS 112.46 / NRRL 194 / M139) OX=227321 GN=enoA PE=1 SV=1	1	94.8816	4.11827e-05	94.882	83.506	94.882	1	94.8816	4.11827e-05	94.882		2	H	RAIVPSGASTGQHEAHELRDGDKSKWLGKGV	X;X;X;X;X;X;X;X;X;X;X;X;Histidine Methyl (H);X;X;Histidine Methyl (H);X;X;X;X;X;X;X;X;X;X;X;X;X;X;X	XPPPPPPPPPPPPPPPPPPXXXXXXXXXXXX	AIVPSGASTGQH(1)EAH(1)ELR	AIVPSGASTGQH(94.88)EAH(94.88)ELR	15	4	0.26198	20595000	0	20595000	0	0.00047124	20595000	0.00047124	0	20595000	0						66	4089	47	47	3153	3557	9578	11595	9578
C8VN22	50	C8VN22	C8VN22	tr|C8VN22|C8VN22_EMENI Uncharacterized protein OS=Emericella nidulans (strain FGSC A4 / ATCC 38163 / CBS 112.46 / NRRL 194 / M139) OX=227321 GN=ANIA_02275 PE=4 SV=1	1	56.5691	0.0218543	56.569	44.574	56.569	1	56.5691	0.0218543	56.569		1	H	AERHGYTRGVVKEIIHDAGRGAPLAKVQFRH	X;X;X;X;X;X;X;X;X;X;X;X;X;X;X;Histidine Methyl (H);X;X;X;X;X;X;X;X;X;X;X;X;X;X;X	XXXXXXXXXXXXPPPPPPPPPPPPPPXXXXX	EIIH(1)DAGRGAPLAK	EIIH(56.57)DAGRGAPLAK	4	3	-0.21955	31623000	31623000	0	0	NaN	31623000	NaN	31623000	0	0						17	1589	50	50	13906	15857	41339;41340	50204;50205	41340
Q5AQG5	58	Q5AQG5	Q5AQG5	tr|Q5AQG5|Q5AQG5_EMENI 60S ribosomal protein L9, putative (AFU_orthologue AFUA_1G09100) OS=Emericella nidulans (strain FGSC A4 / ATCC 38163 / CBS 112.46 / NRRL 194 / M139) OX=227321 GN=ANIA_09465 PE=4 SV=1	1	41.7043	0.0166879	41.704	6.8169	41.704	1	41.7043	0.0166879	41.704		2	H	VTFGRPKKDVISIEMHHGSRKGVATLRTVRT	X;X;X;X;X;X;X;X;X;X;X;X;X;X;Oxidation (M);Histidine Methyl (H);Histidine Methyl (H);X;X;X;X;X;X;X;X;X;X;X;X;X;X	XXXXXXXPPPPPPPPPPPPPXXXXXXXXXXX	KDVISIEMH(1)H(1)GSR	KDVISIEMH(41.7)H(41.7)GSR	9	2	-2.4508	19841000	0	19841000	0	0.0078836	19841000	0.0078836	0	19841000	0						33	2437	58	58	32983	37489	99082	121665	99082
Q5AQG5	59	Q5AQG5	Q5AQG5	tr|Q5AQG5|Q5AQG5_EMENI 60S ribosomal protein L9, putative (AFU_orthologue AFUA_1G09100) OS=Emericella nidulans (strain FGSC A4 / ATCC 38163 / CBS 112.46 / NRRL 194 / M139) OX=227321 GN=ANIA_09465 PE=4 SV=1	1	41.7043	0.0166879	41.704	6.8169	41.704	1	41.7043	0.0166879	41.704		2	H	TFGRPKKDVISIEMHHGSRKGVATLRTVRTL	X;X;X;X;X;X;X;X;X;X;X;X;X;Oxidation (M);Histidine Methyl (H);Histidine Methyl (H);X;X;X;X;X;X;X;X;X;X;X;X;X;X;X	XXXXXXPPPPPPPPPPPPPXXXXXXXXXXXX	KDVISIEMH(1)H(1)GSR	KDVISIEMH(41.7)H(41.7)GSR	10	2	-2.4508	19841000	0	19841000	0	0.0078836	19841000	0.0078836	0	19841000	0						34	2437	59	59	32983	37489	99082	121665	99082
Q5AZU9	59	Q5AZU9	Q5AZU9	tr|Q5AZU9|Q5AZU9_EMENI 60S ribosomal protein L44 P (Broad) OS=Emericella nidulans (strain FGSC A4 / ATCC 38163 / CBS 112.46 / NRRL 194 / M139) OX=227321 GN=ANIA_06181 PE=3 SV=1	1	59.6073	5.14301e-05	151.66	130.09	59.607	1	59.6073	5.14301e-05	151.66		1	H	DRKQSGYGGQTKPVFHKKAKTTKKVVLRLEC	X;X;X;X;X;X;X;X;X;X;X;X;X;X;X;Histidine Methyl (H);X;X;X;X;X;X;X;X;X;X;X;X;X;X;X	XXXPPPPPPPPPPPPPPXXXXXXXXXXXXXX	QSGYGGQTKPVFH(1)K	QSGYGGQTKPVFH(59.61)K	13	3	0.23659	14941000000	14941000000	0	0	764.09	563940000	28.841	563940000	0	0						60	3872	59	59	53210	61418	162058;162059;162060;162061;162062;162063;162064;162065;162066;162067;162068;162069;162070;162071	197652;197653;197654;197655;197656;197657;197658;197659;197660;197661;197662;197663;197664;197665;197666;197667;197668;197669;197670;197671;197672	162071
Q5B6M4	76	Q5B6M4	Q5B6M4	tr|Q5B6M4|Q5B6M4_EMENI Histone deacetylase OS=Emericella nidulans (strain FGSC A4 / ATCC 38163 / CBS 112.46 / NRRL 194 / M139) OX=227321 GN=ANIA_03806 PE=3 SV=1	1	48.2287	0.0164223	48.229	37.391	48.229	1	48.2287	0.0164223	48.229		3	H	WRLTLTKQLVLAYGMHHAMDLYHCRAATVEE	X;X;X;X;X;X;X;X;X;X;X;X;X;X;Oxidation (M);Histidine Methyl (H);Histidine Methyl (H);X;Oxidation (M);X;X;X;Histidine Methyl (H);X;X;X;X;X;X;X;X	XXPPPPPPPPPPPPPPPPPPPPPPPXXXXXX	LTLTKQLVLAYGMH(1)H(1)AMDLYH(1)CR	LTLTKQLVLAYGMH(48.23)H(48.23)AMDLYH(48.23)CR	14	3	1.4312	36129000	0	0	36129000	NaN	36129000	NaN	0	0	36129000						76	5073	76	76	42179	47754	126745	155285	126745
Q5B6M4	77	Q5B6M4	Q5B6M4	tr|Q5B6M4|Q5B6M4_EMENI Histone deacetylase OS=Emericella nidulans (strain FGSC A4 / ATCC 38163 / CBS 112.46 / NRRL 194 / M139) OX=227321 GN=ANIA_03806 PE=3 SV=1	1	48.2287	0.0164223	48.229	37.391	48.229	1	48.2287	0.0164223	48.229		3	H	RLTLTKQLVLAYGMHHAMDLYHCRAATVEEL	X;X;X;X;X;X;X;X;X;X;X;X;X;Oxidation (M);Histidine Methyl (H);Histidine Methyl (H);X;Oxidation (M);X;X;X;Histidine Methyl (H);X;X;X;X;X;X;X;X;X	XPPPPPPPPPPPPPPPPPPPPPPPXXXXXXX	LTLTKQLVLAYGMH(1)H(1)AMDLYH(1)CR	LTLTKQLVLAYGMH(48.23)H(48.23)AMDLYH(48.23)CR	15	3	1.4312	36129000	0	0	36129000	NaN	36129000	NaN	0	0	36129000						77	5073	77	77	42179	47754	126745	155285	126745
Q5B6M4	83	Q5B6M4	Q5B6M4	tr|Q5B6M4|Q5B6M4_EMENI Histone deacetylase OS=Emericella nidulans (strain FGSC A4 / ATCC 38163 / CBS 112.46 / NRRL 194 / M139) OX=227321 GN=ANIA_03806 PE=3 SV=1	1	48.2287	0.0164223	48.229	37.391	48.229	1	48.2287	0.0164223	48.229		3	H	QLVLAYGMHHAMDLYHCRAATVEELSDFHTS	X;X;X;X;X;X;X;Oxidation (M);Histidine Methyl (H);Histidine Methyl (H);X;Oxidation (M);X;X;X;Histidine Methyl (H);X;X;X;X;X;X;X;X;X;X;X;X;X;X;X	PPPPPPPPPPPPPPPPPPXXXXXXXXXXXXX	LTLTKQLVLAYGMH(1)H(1)AMDLYH(1)CR	LTLTKQLVLAYGMH(48.23)H(48.23)AMDLYH(48.23)CR	21	3	1.4312	36129000	0	0	36129000	NaN	36129000	NaN	0	0	36129000						78	5073	83	83	42179	47754	126745	155285	126745
Q5BGS0	84	Q5BGS0	Q5BGS0	tr|Q5BGS0|Q5BGS0_EMENI DNA primase large subunit OS=Emericella nidulans (strain FGSC A4 / ATCC 38163 / CBS 112.46 / NRRL 194 / M139) OX=227321 GN=ANIA_00260 PE=3 SV=1	1	42.8179	0.0151851	42.818	25.312	42.818	1	42.8179	0.0151851	42.818		1	H	EACSYRNKTAAETTAHITPLLQKFLPLSANT	X;X;X;X;X;X;X;X;X;X;X;X;Phospho (STY);X;X;Histidine Methyl (H);X;Phospho (STY);X;X;X;X;X;X;X;X;X;X;X;X;X	XXXXXXPPPPPPPPPPPPPPPPPXXXXXXXX	NKTAAETTAH(1)ITPLLQK	NKTAAETTAH(42.82)ITPLLQK	10	3	2.3825	16408000	16408000	0	0	NaN	16408000	NaN	16408000	0	0						111	6818	84	84	46803	54154	143117	175142	143117
C8VMQ7	88	C8VMQ7	C8VMQ7	tr|C8VMQ7|C8VMQ7_EMENI ATP synthase subunit alpha OS=Emericella nidulans (strain FGSC A4 / ATCC 38163 / CBS 112.46 / NRRL 194 / M139) OX=227321 GN=ANIA_01523 PE=3 SV=1	1	70.5552	0.000306731	70.555	61.272	70.555	1	70.5552	0.000306731	70.555		1	H	ETGRVLSVGDGIARVHGMTNVQAEELVEFAS	X;X;X;X;X;X;X;X;X;X;X;X;X;X;X;Histidine Methyl (H);X;X;X;X;X;X;X;X;X;X;X;X;X;X;X	XXXXXXXXXXXXXXPPPPPPPPPPPPPPPPP	VH(1)GMTNVQAEELVEFASGVK	VH(70.56)GMTNVQAEELVEFASGVK	2	3	1.9374	0	0	0	0	0	0	0	0	0	0						16	1556	88	88	69060	79597	209639	255251	209639
Q5AYE7	93	Q5AYE7	Q5AYE7	tr|Q5AYE7|Q5AYE7_EMENI Uncharacterized protein OS=Emericella nidulans (strain FGSC A4 / ATCC 38163 / CBS 112.46 / NRRL 194 / M139) OX=227321 GN=ANIA_06683 PE=4 SV=1	1	61.9993	0.0144172	61.999	27.192	61.999	1	61.9993	0.0144172	61.999		1	H	SQAEIAAYCRAVAEMHDIPRHVTLRSTVQSA	X;X;X;X;X;X;X;X;X;X;X;X;X;X;Oxidation (M);Histidine Methyl (H);X;X;X;X;X;X;X;X;X;X;X;X;X;X;X	XXXXXXXXXXPPPPPPPPPPXXXXXXXXXXX	AVAEMH(1)DIPR	AVAEMH(62)DIPR	6	2	4.3315	0	0	0	0	NaN	0	NaN	0	0	0						58	3607	93	93	6668	7639	19846	24097	19846
P33282	94	P33282	P33282	sp|P33282|URIC_EMENI Uricase OS=Emericella nidulans (strain FGSC A4 / ATCC 38163 / CBS 112.46 / NRRL 194 / M139) OX=227321 GN=uaZ PE=3 SV=1	0.333332	0	0.0161438	57.785	37.355	57.785	0.333332	0	0.0161438	57.785			H	LFGSILGTHFINKYKHIHVAHTNIITHRWTR	X;X;X;X;X;X;X;X;X;X;X;X;X;X;X;Histidine Methyl (H);X;X;X;X;X;Phospho (STY);X;X;X;X;X;X;X;X;X	XXXXXXXXXXXXXPPPPPPPPPPPPPPPXXX	YKH(0.333)IH(0.333)VAH(0.333)TNIITHR	YKH(0)IH(0)VAH(0)TNIITH(-51.94)R	3	2	1.0513	0	0	0	0	NaN	0	NaN	0	0	0						30	2334	94	94	75160	86531			228765
P33282	96	P33282	P33282	sp|P33282|URIC_EMENI Uricase OS=Emericella nidulans (strain FGSC A4 / ATCC 38163 / CBS 112.46 / NRRL 194 / M139) OX=227321 GN=uaZ PE=3 SV=1	0.333332	0	0.0161438	57.785	37.355	57.785	0.333332	0	0.0161438	57.785			H	GSILGTHFINKYKHIHVAHTNIITHRWTRLN	X;X;X;X;X;X;X;X;X;X;X;X;X;X;X;X;X;X;X;X;X;X;X;X;X;X;X;X;X;X;X	XXXXXXXXXXXXXXXXXXXXXXXXXXXXXXX	YKH(0.333)IH(0.333)VAH(0.333)TNIITHR	YKH(0)IH(0)VAH(0)TNIITH(-51.94)R	5	2	1.0513	0	0	0	0	NaN	0	NaN	0	0	0						31	2334	96	96	75160	86531			228765
P33282	99	P33282	P33282	sp|P33282|URIC_EMENI Uricase OS=Emericella nidulans (strain FGSC A4 / ATCC 38163 / CBS 112.46 / NRRL 194 / M139) OX=227321 GN=uaZ PE=3 SV=1	0.333332	0	0.0161438	57.785	37.355	57.785	0.333332	0	0.0161438	57.785			H	LGTHFINKYKHIHVAHTNIITHRWTRLNIDG	X;X;X;X;X;X;X;X;X;X;X;X;X;X;X;X;X;X;X;X;X;X;X;X;X;X;X;X;X;X;X	XXXXXXXXXXXXXXXXXXXXXXXXXXXXXXX	YKH(0.333)IH(0.333)VAH(0.333)TNIITHR	YKH(0)IH(0)VAH(0)TNIITH(-51.94)R	8	2	1.0513	0	0	0	0	NaN	0	NaN	0	0	0						32	2334	99	99	75160	86531			228765
Q5AXD1	100	Q5AXD1	Q5AXD1	sp|Q5AXD1|MCD4_EMENI GPI ethanolamine phosphate transferase 1 OS=Emericella nidulans (strain FGSC A4 / ATCC 38163 / CBS 112.46 / NRRL 194 / M139) OX=227321 GN=mcd4 PE=3 SV=1	0.5	0	0.0129519	56.258	20.314	56.258	0.5	0	0.0129519	56.258			H	DLTFLAPFIRSRVLSHGTFGISHTRVPTESR	X;X;X;X;X;X;X;X;X;X;X;X;X;X;X;Histidine Methyl (H);X;Phospho (STY);X;X;X;Phospho (STY);X;X;X;X;X;X;X;X;X	XXXXXXXXXXXXPPPPPPPPPPPPPXXXXXX	VLSH(0.5)GTFGISH(0.5)TR	VLSH(0)GTFGISH(0)TR	4	2	-0.42571	262560000	262560000	0	0	0.46519	262560000	0.46519	262560000	0	0						51	3435	100	100	70257	80928	213533	260123	213533
Q5B4A1	101	Q5B4A1	Q5B4A1	tr|Q5B4A1|Q5B4A1_EMENI Uncharacterized protein OS=Emericella nidulans (strain FGSC A4 / ATCC 38163 / CBS 112.46 / NRRL 194 / M139) OX=227321 GN=ANIA_04629 PE=4 SV=1	1	63.3322	0.0132721	64.65	50.048	64.65	1	63.3322	0.0132721	64.65		1	H	WWSANLHQNAARRDTHELGFMIAPWAIKAWE	X;X;X;X;X;X;X;X;X;X;X;X;X;X;X;Histidine Methyl (H);X;X;X;X;X;X;X;X;X;X;X;X;X;X;X	XXXXXXXXXXXXPPPPPPPPPPPPPPPPPPP	RDTH(1)ELGFMIAPWAIKAWELHR	RDTH(63.33)ELGFMIAPWAIKAWELH(-63.33)R	4	2	-1.1	19321000	19321000	0	0	NaN	19321000	NaN	19321000	0	0						70	4624	101	101	53964	62221	163770	199641	163770
Q5BCZ1	102	Q5BCZ1	Q5BCZ1	tr|Q5BCZ1|Q5BCZ1_EMENI Uncharacterized protein OS=Emericella nidulans (strain FGSC A4 / ATCC 38163 / CBS 112.46 / NRRL 194 / M139) OX=227321 GN=ANIA_01589 PE=4 SV=1	1	69.2755	0.00899486	69.276	33.831	69.276	1	69.2755	0.00899486	69.276		1	H	CDEGKNEPSWRASLEHEVLYRFTVEVSCPTC	X;X;X;X;X;X;X;X;X;X;X;X;X;X;X;Histidine Methyl (H);X;X;X;X;X;X;X;X;X;X;X;X;X;X;X	XXXXXXXXXXXPPPPPPPPPPXXXXXXXXXX	ASLEH(1)EVLYR	ASLEH(69.28)EVLYR	5	3	-0.50503	72682000	72682000	0	0	5.8838	72682000	5.8838	72682000	0	0						100	6131	102	102	5832	6685	17492	21240	17492
Q5AXD1	107	Q5AXD1	Q5AXD1	sp|Q5AXD1|MCD4_EMENI GPI ethanolamine phosphate transferase 1 OS=Emericella nidulans (strain FGSC A4 / ATCC 38163 / CBS 112.46 / NRRL 194 / M139) OX=227321 GN=mcd4 PE=3 SV=1	0.988018	19.4828	0.0118396	74.464	35.16	74.464	0.988018	19.4828	0.0118396	74.464		1	H	FIRSRVLSHGTFGISHTRVPTESRPGHVALI	X;X;X;X;X;X;X;X;X;X;Phospho (STY);X;X;X;Phospho (STY);Histidine Methyl (H);X;X;X;X;X;X;X;X;X;X;X;X;X;X;X	XXXXXPPPPPPPPPPPPPXXXXXXXXXXXXX	VLSH(0.012)GTFGISH(0.988)TR	VLSH(-19.48)GTFGISH(19.48)TR	11	2	0.4822	318080000	318080000	0	0	0.56356	262560000	0.46519	262560000	0	0						52	3435	107	107	70257	80928	213532;213533	260122;260123	213532
Q5AXQ8	115	Q5AXQ8	Q5AXQ8	tr|Q5AXQ8|Q5AXQ8_EMENI CCCH finger DNA binding protein, putative (AFU_orthologue AFUA_5G13930) OS=Emericella nidulans (strain FGSC A4 / ATCC 38163 / CBS 112.46 / NRRL 194 / M139) OX=227321 GN=ANIA_06922 PE=4 SV=1	1	58.6765	0.013861	78.932	50.723	58.676	1	58.6765	0.013861	78.932		1	H	YKQGHCEKGRKCKFSHDLNVDRKAAKKDLYT	X;X;X;X;X;X;X;X;X;X;X;X;X;X;X;Histidine Methyl (H);X;X;X;X;X;X;X;X;X;X;X;X;X;X;X	XXXXXXXXXXXXXPPPPPPPPPPXXXXXXXX	FSH(1)DLNVDRK	FSH(58.68)DLNVDRK	3	3	0.17469	255910000	255910000	0	0	NaN	167030000	NaN	167030000	0	0						56	3492	115	115	19494;19495	22166;22167	56460;56461;56462	68905;68906;68907	56462
Q5BFW3	129	Q5BFW3	Q5BFW3	tr|Q5BFW3|Q5BFW3_EMENI Uncharacterized protein OS=Emericella nidulans (strain FGSC A4 / ATCC 38163 / CBS 112.46 / NRRL 194 / M139) OX=227321 GN=ANIA_00567 PE=3 SV=1	1	100.066	0.0127978	100.07	47.43	100.07	1	100.066	0.0127978	100.07			H	AKGWTTEELLPLMKKHETYQRACNNPEIHGF	X;X;X;X;X;X;X;X;X;X;X;X;Oxidation (M);X;X;Histidine Methyl (H);X;X;X;X;X;X;X;X;X;X;X;X;X;X;X	XXXXXXXXXXXXXXPPPPPPPXXXXXXXXXX	KH(1)ETYQR	KH(100.07)ETYQR	2	1	-1.899	57693000	57693000	0	0	NaN	57693000	NaN	57693000	0	0						106	6675	129	129	33320	37858	100102	122868	100102
Q5B017	133	Q5B017	Q5B017	tr|Q5B017|Q5B017_EMENI Uncharacterized protein OS=Emericella nidulans (strain FGSC A4 / ATCC 38163 / CBS 112.46 / NRRL 194 / M139) OX=227321 GN=ANIA_06113 PE=4 SV=1	1	51.013	0.00694316	51.013	10.288	51.013	1	51.013	0.00694316	51.013		1	H	QILPSYAYDRDKVLSHARLYAKEFESVEITK	X;X;X;X;X;X;X;X;X;X;X;X;X;X;Phospho (STY);Histidine Methyl (H);X;X;X;X;X;X;X;X;X;Phospho (STY);X;X;X;Phospho (STY);X	XXXXXXXXXXXXPPPPPPPPPPPPPPPPPPP	VLSH(1)ARLYAKEFESVEITK	VLSH(51.01)ARLYAKEFESVEITK	4	2	-1.5157	35016000	35016000	0	0	NaN	35016000	NaN	35016000	0	0						61	3898	133	133	70255	80926	213530	260120	213530
G5EB41	134	G5EB41	G5EB41	tr|G5EB41|G5EB41_EMENI Uncharacterized protein OS=Emericella nidulans (strain FGSC A4 / ATCC 38163 / CBS 112.46 / NRRL 194 / M139) OX=227321 GN=cyaA PE=4 SV=1	1	54.306	0.00445123	54.306	46.217	54.306	1	54.306	0.00445123	54.306		1	H	NPSPRVNTNYGDYFQHDPQGTLSYSPRLGTG	X;X;X;X;X;X;X;X;X;X;X;X;X;X;X;Histidine Methyl (H);X;X;X;X;X;X;X;X;X;X;X;X;X;X;X	XXXXXPPPPPPPPPPPPPPPPPPPPPPXXXX	VNTNYGDYFQH(1)DPQGTLSYSPR	VNTNYGDYFQH(54.31)DPQGTLSYSPR	11	3	0.50408	12884000	12884000	0	0	0.15895	12884000	0.15895	12884000	0	0						27	2188	134	134	70769	81593	215580	262639	215580
Q5B2F8	137	Q5B2F8	Q5B2F8	tr|Q5B2F8|Q5B2F8_EMENI Uncharacterized protein OS=Emericella nidulans (strain FGSC A4 / ATCC 38163 / CBS 112.46 / NRRL 194 / M139) OX=227321 GN=ANIA_05272 PE=4 SV=1	1	53.2112	0.0064417	53.211	40.074	53.211	1	53.2112	0.0064417	53.211		1	H	AVFIAPKIGTRSLMGHVENLQDRSSKNPTLS	X;X;X;X;X;X;X;X;X;X;X;X;X;Oxidation (M);X;Histidine Methyl (H);X;X;X;X;X;X;X;X;X;X;X;X;X;X;X	XXXXXXXXXXXPPPPPPPPPPPPXXXXXXXX	SLMGH(1)VENLQDR	SLMGH(53.21)VENLQDR	5	3	1.4351	6723600	6723600	0	0	NaN	6723600	NaN	6723600	0	0						68	4304	137	137	58584	67452	177293;177294	215833;215834	177294
C8V790	140	C8V790	C8V790	tr|C8V790|C8V790_EMENI BEM46 family protein (AFU_orthologue AFUA_7G04660) OS=Emericella nidulans (strain FGSC A4 / ATCC 38163 / CBS 112.46 / NRRL 194 / M139) OX=227321 GN=ANIA_03757 PE=4 SV=1	1	107.574	0.0144909	107.57	70.383	107.57	1	107.574	0.0144909	107.57			H	PDEHGLKIDAQTALDHLRLRGETANSRIVVY	X;X;X;X;X;X;X;X;X;X;X;X;X;X;X;Histidine Methyl (H);X;X;X;X;X;X;X;X;X;X;X;X;X;X;X	XXXXXXXPPPPPPPPPPPXXXXXXXXXXXXX	IDAQTALDH(1)LR	IDAQTALDH(107.57)LR	9	2	0.10544	54789000	54789000	0	0	0.058321	54789000	0.058321	54789000	0	0						6	509	140	140	27977	31866	83125	101907	83125
Q5AVD6	140	Q5AVD6	Q5AVD6	tr|Q5AVD6|Q5AVD6_EMENI Uncharacterized protein OS=Emericella nidulans (strain FGSC A4 / ATCC 38163 / CBS 112.46 / NRRL 194 / M139) OX=227321 GN=ANIA_07744 PE=4 SV=1	1	40.8015	0.0118799	40.801	26.329	40.801	1	40.8015	0.0118799	40.801		1	H	PWEWYRSARTVRRQNHLYDIAPPMGIDRPIS	X;X;X;X;X;X;X;X;X;X;X;X;X;X;X;Histidine Methyl (H);X;Phospho (STY);X;X;X;X;X;X;X;X;X;X;X;X;X	XXXXXXXXXXXXPPPPPPPPPPPPPPPPXXX	RQNH(1)LYDIAPPMGIDR	RQNH(40.8)LYDIAPPMGIDR	4	3	-4.2421	0	0	0	0	NaN	0	NaN	0	0	0						48	3122	140	140	55201	63583	167996	204750	167996
Q5BH49	148	Q5BH49	Q5BH49	tr|Q5BH49|Q5BH49_EMENI Secretory pathway protein Ssp120, putative (AFU_orthologue AFUA_5G11640) OS=Emericella nidulans (strain FGSC A4 / ATCC 38163 / CBS 112.46 / NRRL 194 / M139) OX=227321 GN=ANIA_00131 PE=4 SV=1	0.999999	59.8867	2.72286e-09	110.77	89.17	110.77	0.999999	59.8867	2.72286e-09	110.77		1	H	GDIEYEYEIHHFEKYHGEDATEEELTHPEDI	X;X;X;X;X;X;X;X;X;X;X;X;X;X;X;Histidine Methyl (H);X;X;X;X;X;X;X;X;X;X;X;X;X;X;X	XXXXXXXXXXXXXXPPPPPPPPPPPPPPPPP	YH(1)GEDATEEELTHPEDIEHFK	YH(59.89)GEDATEEELTH(-59.89)PEDIEH(-103.15)FK	2	3	0.97658	150320000	150320000	0	0	0.40294	108270000	0.29022	108270000	0	0						115	6885	148	148	74900	86242	227908;227909	277885;277886	227909
Q5BBZ2	160	Q5BBZ2	Q5BBZ2	tr|Q5BBZ2|Q5BBZ2_EMENI 15-hydroxyprostaglandin dehydrogenase (NAD(+)) (AFU_orthologue AFUA_3G09480) OS=Emericella nidulans (strain FGSC A4 / ATCC 38163 / CBS 112.46 / NRRL 194 / M139) OX=227321 GN=ANIA_01938 PE=4 SV=1	1	96.3311	0.00984126	96.331	53.588	96.331	1	96.3311	0.00984126	96.331		1	H	GGRIVVTGSIGAVFPHRSYPVYCGTKAAVNH	X;X;X;X;X;X;Phospho (STY);X;X;X;X;X;X;X;X;Histidine Methyl (H);X;X;X;X;X;X;X;X;X;X;X;X;X;X;X	XXXPPPPPPPPPPPPPPXXXXXXXXXXXXXX	IVVTGSIGAVFPH(1)R	IVVTGSIGAVFPH(96.33)R	13	2	-2.0405	1356000000	1356000000	0	0	NaN	1356000000	NaN	1356000000	0	0						98	5959	160	160	32451	36911	97486	119750	97486
Q5AXP5	161	Q5AXP5	Q5AXP5	tr|Q5AXP5|Q5AXP5_EMENI Uncharacterized protein OS=Emericella nidulans (strain FGSC A4 / ATCC 38163 / CBS 112.46 / NRRL 194 / M139) OX=227321 GN=ANIA_06935 PE=4 SV=1	0.999994	52.3695	0.012959	60.59	38.504	60.59	0.999994	52.3695	0.012959	60.59		2	H	EVVRALWHTIERFSKHAHYHIFRKLPVIFAV	X;X;X;X;X;X;X;X;X;X;X;X;X;X;X;Histidine Methyl (H);X;Histidine Methyl (H);X;X;X;X;X;X;X;X;X;X;X;X;X	XXXXXXXXXXXXPPPPPPPPPPPXXXXXXXX	FSKH(1)AH(1)YHIFR	FSKH(52.37)AH(38.5)YH(-38.5)IFR	4	2	3.272	0	0	0	0	NaN	0	NaN	0	0	0						54	3487	161	161	19524	22198	56545	69005	56545
Q5AXP5	163	Q5AXP5	Q5AXP5	tr|Q5AXP5|Q5AXP5_EMENI Uncharacterized protein OS=Emericella nidulans (strain FGSC A4 / ATCC 38163 / CBS 112.46 / NRRL 194 / M139) OX=227321 GN=ANIA_06935 PE=4 SV=1	0.999859	38.5037	0.012959	60.59	38.504	60.59	0.999859	38.5037	0.012959	60.59		2	H	VRALWHTIERFSKHAHYHIFRKLPVIFAVAL	X;X;X;X;X;X;X;X;X;X;X;X;X;Histidine Methyl (H);X;Histidine Methyl (H);X;X;X;X;X;X;X;X;X;X;X;X;X;X;X	XXXXXXXXXXPPPPPPPPPPPXXXXXXXXXX	FSKH(1)AH(1)YHIFR	FSKH(52.37)AH(38.5)YH(-38.5)IFR	6	2	3.272	0	0	0	0	NaN	0	NaN	0	0	0						55	3487	163	163	19524	22198	56545	69005	56545
Q5BAR9	164	Q5BAR9	Q5BAR9	tr|Q5BAR9|Q5BAR9_EMENI Haloacid dehalogenase, type II (AFU_orthologue AFUA_5G14640) OS=Emericella nidulans (strain FGSC A4 / ATCC 38163 / CBS 112.46 / NRRL 194 / M139) OX=227321 GN=ANIA_02361 PE=4 SV=1	1	41.3995	0.0164044	41.399	9.2405	41.399	1	41.3995	0.0164044	41.399		2	H	SVESIKAYKPAPAVYHHLVAKTGKSSAQKGD	X;X;X;X;X;X;X;X;X;X;X;X;X;X;Phospho (STY);Histidine Methyl (H);Histidine Methyl (H);X;X;X;X;Phospho (STY);X;X;X;X;X;X;X;X;X	XXXXXXXXXPPPPPPPPPPPPPPPXXXXXXX	PAPAVYH(1)H(1)LVAKTGK	PAPAVYH(41.4)H(41.4)LVAKTGK	7	2	-2.5293	58568000	0	58568000	0	NaN	58568000	NaN	0	58568000	0						93	5719	164	164	48816	56491	149123	182411	149123
Q5BAR9	165	Q5BAR9	Q5BAR9	tr|Q5BAR9|Q5BAR9_EMENI Haloacid dehalogenase, type II (AFU_orthologue AFUA_5G14640) OS=Emericella nidulans (strain FGSC A4 / ATCC 38163 / CBS 112.46 / NRRL 194 / M139) OX=227321 GN=ANIA_02361 PE=4 SV=1	1	41.3995	0.0164044	41.399	9.2405	41.399	1	41.3995	0.0164044	41.399		2	H	VESIKAYKPAPAVYHHLVAKTGKSSAQKGDI	X;X;X;X;X;X;X;X;X;X;X;X;X;Phospho (STY);Histidine Methyl (H);Histidine Methyl (H);X;X;X;X;Phospho (STY);X;X;X;X;X;X;X;X;X;X	XXXXXXXXPPPPPPPPPPPPPPPXXXXXXXX	PAPAVYH(1)H(1)LVAKTGK	PAPAVYH(41.4)H(41.4)LVAKTGK	8	2	-2.5293	58568000	0	58568000	0	NaN	58568000	NaN	0	58568000	0						94	5719	165	165	48816	56491	149123	182411	149123
Q5BG94	168	Q5BG94	Q5BG94	tr|Q5BG94|Q5BG94_EMENI Regulator of gluconeogenesis Rmd5, putative (AFU_orthologue AFUA_1G04490) OS=Emericella nidulans (strain FGSC A4 / ATCC 38163 / CBS 112.46 / NRRL 194 / M139) OX=227321 GN=ANIA_00436 PE=4 SV=1	1	76.3317	0.00622798	76.332	28.784	76.332	1	76.3317	0.00622798	76.332		2	H	LDIGGVPSSKVRDEFHNMYRILHELKENNNL	X;X;X;X;X;X;X;X;X;X;X;X;X;X;X;Histidine Methyl (H);X;Oxidation (M);Phospho (STY);X;X;X;Histidine Methyl (H);X;X;X;X;X;X;X;X	XXXXXXXXXXPPPPPPPPPPPPPPPPXXXXX	VRDEFH(1)NMYRILH(1)ELK	VRDEFH(76.33)NMYRILH(76.33)ELK	6	2	1.0313	199740000	0	199740000	0	NaN	199740000	NaN	0	199740000	0						107	6727	168	168	71403	82300	217503	264953	217503
P20654	172	P20654	P20654	sp|P20654|PP1_EMENI Serine/threonine-protein phosphatase PP1 OS=Emericella nidulans (strain FGSC A4 / ATCC 38163 / CBS 112.46 / NRRL 194 / M139) OX=227321 GN=bimG PE=2 SV=1	1	66.1517	0.00104883	66.152	46.436	66.152	1	66.1517	0.00104883	66.152		1	H	CLPIAAIIDEKIFTMHGGLSPDLNSMEQIRR	X;X;X;X;X;X;X;X;X;X;X;X;X;X;Oxidation (M);Histidine Methyl (H);X;X;X;X;X;X;X;X;X;Oxidation (M);X;X;X;X;X	XXXXXXXXXXXPPPPPPPPPPPPPPPPPPPX	IFTMH(1)GGLSPDLNSMEQIR	IFTMH(66.15)GGLSPDLNSMEQIR	5	3	-1.7384	256560000	256560000	0	0	0.049004	256560000	0.049004	256560000	0	0						29	2306	172	172	28714	32672	85214	104492	85214
Q5BEU1	172	Q5BEU1	Q5BEU1	tr|Q5BEU1|Q5BEU1_EMENI TIM barrel metal-dependent hydrolase, putative (AFU_orthologue AFUA_1G16240) OS=Emericella nidulans (strain FGSC A4 / ATCC 38163 / CBS 112.46 / NRRL 194 / M139) OX=227321 GN=ANIA_00939 PE=4 SV=1	0.5	0	0.00457387	40.381	25.066	40.381	0.5	0	0.00457387	40.381		1	H	KRARLIRDLGWMIQVHTPMSTMPHLEEIIPK	X;X;X;X;X;X;X;X;X;X;X;Oxidation (M);X;X;X;Histidine Methyl (H);X;X;Oxidation (M);X;X;X;X;X;X;X;X;X;X;X;X	XXXXXXXPPPPPPPPPPPPPPPPPPPPPPPP	DLGWMIQVH(0.5)TPMSTMPH(0.5)LEEIIPK	DLGWMIQVH(0)TPMSTMPH(0)LEEIIPK	9	3	0.2858	32155000	32155000	0	0	NaN	32155000	NaN	32155000	0	0						104	6464	172	172	9772	11145	29432	35616	29432
Q5AS52	174	Q5AS52	Q5AS52	tr|Q5AS52|Q5AS52_EMENI Uncharacterized protein OS=Emericella nidulans (strain FGSC A4 / ATCC 38163 / CBS 112.46 / NRRL 194 / M139) OX=227321 GN=ANIA_08878 PE=4 SV=1	1	53.7511	0.0132261	53.751	24.793	53.751	1	53.7511	0.0132261	53.751		1	H	VYEKSGLLKSCIPMLHQVITNKLSSYFGSLQ	X;X;X;X;X;X;X;X;X;X;X;X;X;Oxidation (M);X;Histidine Methyl (H);X;X;X;Phospho (STY);X;X;X;X;X;X;X;X;X;X;X	XXXXXXXXXPPPPPPPPPPPPPXXXXXXXXX	SCIPMLH(1)QVITNK	SCIPMLH(53.75)QVITNK	7	2	0.8926	21591000	21591000	0	0	NaN	21591000	NaN	21591000	0	0						39	2652	174	174	56183	64689	170779	208070	170779
Q5BG94	175	Q5BG94	Q5BG94	tr|Q5BG94|Q5BG94_EMENI Regulator of gluconeogenesis Rmd5, putative (AFU_orthologue AFUA_1G04490) OS=Emericella nidulans (strain FGSC A4 / ATCC 38163 / CBS 112.46 / NRRL 194 / M139) OX=227321 GN=ANIA_00436 PE=4 SV=1	1	76.3317	0.00622798	76.332	28.784	76.332	1	76.3317	0.00622798	76.332		2	H	SSKVRDEFHNMYRILHELKENNNLLPAIEWS	X;X;X;X;X;X;X;X;Histidine Methyl (H);X;Oxidation (M);Phospho (STY);X;X;X;Histidine Methyl (H);X;X;X;X;X;X;X;X;X;X;X;X;X;X;X	XXXPPPPPPPPPPPPPPPPXXXXXXXXXXXX	VRDEFH(1)NMYRILH(1)ELK	VRDEFH(76.33)NMYRILH(76.33)ELK	13	2	1.0313	199740000	0	199740000	0	NaN	199740000	NaN	0	199740000	0						108	6727	175	175	71403	82300	217503	264953	217503
Q5ARH4	176	Q5ARH4	Q5ARH4	tr|Q5ARH4|Q5ARH4_EMENI Triacylglycerol lipase, putative (AFU_orthologue AFUA_7G02040) OS=Emericella nidulans (strain FGSC A4 / ATCC 38163 / CBS 112.46 / NRRL 194 / M139) OX=227321 GN=ANIA_09106 PE=4 SV=1	0.999895	42.2603	0.0054291	43.176	29.066	43.176	0.999895	42.2603	0.0054291	43.176		1	H	PENFKVLSLTTIATPHRGSAVADYLLQQIGD	X;X;X;X;X;X;X;Phospho (STY);X;X;X;X;X;X;X;Histidine Methyl (H);X;X;X;X;X;X;X;X;X;X;X;X;X;X;X	PPPPPPPPPPPPPPPPPXXXXXXXXXXXXXX	YMITHLKPENFKVLSLTTIATPH(1)R	YMITH(-42.26)LKPENFKVLSLTTIATPH(42.26)R	23	3	0.50063	35292000	35292000	0	0	NaN	35292000	NaN	35292000	0	0						36	2563	176	176	75557	86997	230051	280521	230051
Q5B709	177	Q5B709	Q5B709	tr|Q5B709|Q5B709_EMENI Uncharacterized protein OS=Emericella nidulans (strain FGSC A4 / ATCC 38163 / CBS 112.46 / NRRL 194 / M139) OX=227321 GN=ANIA_03672 PE=3 SV=1	1	58.596	0.0129801	58.596	19.634	58.596	1	58.596	0.0129801	58.596		1	H	AVGLDLEDAEYLTRKHSGNSNQLRLLHYLPV	X;X;X;X;X;X;X;X;X;X;X;X;X;X;X;Histidine Methyl (H);Phospho (STY);X;X;X;X;X;X;X;X;X;X;X;X;X;X	XXXXXXXXXXXXXXPPPPPPPPPPXXXXXXX	KH(1)SGNSNQLR	KH(58.6)SGNSNQLR	2	2	-4.1049	0	0	0	0	NaN	0	NaN	0	0	0						82	5130	177	177	33340	37878	100138	122909	100138
C8V0H6	179	C8V0H6	C8V0H6	tr|C8V0H6|C8V0H6_EMENI Malate dehydrogenase, NAD-dependent (AFU_orthologue AFUA_6G05210) OS=Emericella nidulans (strain FGSC A4 / ATCC 38163 / CBS 112.46 / NRRL 194 / M139) OX=227321 GN=ANIA_06499 PE=3 SV=1	1	53.3415	0.00267655	53.342	46.389	53.342	1	53.3415	0.00267655	53.342		1	H	GQKDPSAVTVPVVGGHSGETIVPLFSKVSPA	X;X;X;X;X;X;X;X;X;X;X;X;X;X;X;Histidine Methyl (H);X;X;X;X;X;X;X;X;X;X;X;X;X;X;X	XXXPPPPPPPPPPPPPPPPPPPPPPPPXXXX	DPSAVTVPVVGGH(1)SGETIVPLFSK	DPSAVTVPVVGGH(53.34)SGETIVPLFSK	13	3	1.2951	2800100	2800100	0	0	6.1415e-05	2800100	6.1415e-05	2800100	0	0						1	59	179	179	10610	12165	31984	38747	31984
Q5BEU1	180	Q5BEU1	Q5BEU1	tr|Q5BEU1|Q5BEU1_EMENI TIM barrel metal-dependent hydrolase, putative (AFU_orthologue AFUA_1G16240) OS=Emericella nidulans (strain FGSC A4 / ATCC 38163 / CBS 112.46 / NRRL 194 / M139) OX=227321 GN=ANIA_00939 PE=4 SV=1	0.5	0	0.00457387	40.381	25.066	40.381	0.5	0	0.00457387	40.381		1	H	LGWMIQVHTPMSTMPHLEEIIPKLGVKVCID	X;X;X;X;X;X;X;X;X;X;X;X;X;X;X;X;X;X;X;X;X;X;X;X;X;X;X;X;X;X;X	XXXXXXXXXXXXXXXXXXXXXXXXXXXXXXX	DLGWMIQVH(0.5)TPMSTMPH(0.5)LEEIIPK	DLGWMIQVH(0)TPMSTMPH(0)LEEIIPK	17	3	0.2858	32155000	32155000	0	0	NaN	32155000	NaN	32155000	0	0						105	6464	180	180	9772	11145	29432	35616	29432
Q5B913	205	Q5B913	Q5B913	tr|Q5B913|Q5B913_EMENI tRNA dihydrouridine synthase (Smm1), putative (AFU_orthologue AFUA_3G08390) OS=Emericella nidulans (strain FGSC A4 / ATCC 38163 / CBS 112.46 / NRRL 194 / M139) OX=227321 GN=ANIA_02967 PE=4 SV=1	1	42.9467	0.0181054	42.947	34.659	42.947	1	42.9467	0.0181054	42.947		1	H	LVSRLVRTGITGLTIHCRTTPMRPRERAIRD	X;X;X;X;X;X;X;X;X;X;X;X;X;Phospho (STY);X;Histidine Methyl (H);X;X;X;X;X;Oxidation (M);X;X;X;X;X;X;X;X;X	XXXXXXXPPPPPPPPPPPPPPPPPPXXXXXX	TGITGLTIH(1)CRTTPMRPR	TGITGLTIH(42.95)CRTTPMRPR	9	3	-4.2136	10829000	10829000	0	0	NaN	10829000	NaN	10829000	0	0						85	5453	205	205	63382	73022	191011	232181	191011
Q5AXH5	206	Q5AXH5	Q5AXH5	tr|Q5AXH5|Q5AXH5_EMENI Conserved leucine-rich repeat protein (AFU_orthologue AFUA_4G04440) OS=Emericella nidulans (strain FGSC A4 / ATCC 38163 / CBS 112.46 / NRRL 194 / M139) OX=227321 GN=ANIA_07005 PE=4 SV=1	1	67.8972	0.0112906	67.897	50.001	67.897	1	67.8972	0.0112906	67.897			H	PPSSIRLPSRPRTSVHKTGPANEHASVDSAD	X;X;X;X;X;X;X;X;X;X;X;X;Phospho (STY);Phospho (STY);X;Histidine Methyl (H);X;X;X;X;X;X;X;X;X;X;X;X;X;X;X	XXXXXXPPPPPPPPPPPXXXXXXXXXXXXXX	LPSRPRTSVH(1)K	LPSRPRTSVH(67.9)K	10	2	-0.49784	756650000	756650000	0	0	NaN	756650000	NaN	756650000	0	0						53	3458	206	206	40413	45767	121723	149196	121723
C8V2U2	265	C8V2U2	C8V2U2	tr|C8V2U2|C8V2U2_EMENI Eukaryotic translation initiation factor subunit eIF-4F, putative (AFU_orthologue AFUA_2G09490) OS=Emericella nidulans (strain FGSC A4 / ATCC 38163 / CBS 112.46 / NRRL 194 / M139) OX=227321 GN=ANIA_06060 PE=4 SV=1	1	62.3029	7.23011e-10	103.95	88.441	62.303	1	62.3029	7.23011e-10	103.95		2	H	PGRGGFYHQGGRGRGHSQSSHQGPVAFSPTP	X;X;X;X;X;X;X;X;X;X;X;X;X;X;X;Histidine Methyl (H);X;X;X;X;Histidine Methyl (H);X;X;X;X;X;X;X;X;X;X	XXXXXXXXXXXXPPPPPPPPPPPPPPPPPPP	GRGH(1)SQSSH(1)QGPVAFSPTPGFR	GRGH(62.3)SQSSH(62.3)QGPVAFSPTPGFR	4	4	0.24599	22141000	0	22141000	0	NaN	22141000	NaN	0	22141000	0						2	222	265	265	23983	27328	69056;69057	84316;84317	69057
C8V2U2	270	C8V2U2	C8V2U2	tr|C8V2U2|C8V2U2_EMENI Eukaryotic translation initiation factor subunit eIF-4F, putative (AFU_orthologue AFUA_2G09490) OS=Emericella nidulans (strain FGSC A4 / ATCC 38163 / CBS 112.46 / NRRL 194 / M139) OX=227321 GN=ANIA_06060 PE=4 SV=1	1	62.3029	7.23011e-10	103.95	88.441	62.303	1	62.3029	7.23011e-10	103.95		2	H	FYHQGGRGRGHSQSSHQGPVAFSPTPGFRQP	X;X;X;X;X;X;X;X;X;X;Histidine Methyl (H);X;X;X;X;Histidine Methyl (H);X;X;X;X;X;X;X;X;X;X;X;X;X;X;X	XXXXXXXPPPPPPPPPPPPPPPPPPPPPPXX	GRGH(1)SQSSH(1)QGPVAFSPTPGFR	GRGH(62.3)SQSSH(62.3)QGPVAFSPTPGFR	9	4	0.24599	22141000	0	22141000	0	NaN	22141000	NaN	0	22141000	0						3	222	270	270	23983	27328	69056;69057	84316;84317	69057
Q5BAL1	286	Q5BAL1	Q5BAL1	tr|Q5BAL1|Q5BAL1_EMENI Uncharacterized protein OS=Emericella nidulans (strain FGSC A4 / ATCC 38163 / CBS 112.46 / NRRL 194 / M139) OX=227321 GN=ANIA_02419 PE=4 SV=1	1	44.2994	0.0151393	44.299	26.032	44.299	1	44.2994	0.0151393	44.299		1	H	KARELKTLNKSMFAVHVSNPFTSAQRKRDRD	X;X;X;X;X;X;X;X;X;X;X;Oxidation (M);X;X;X;Histidine Methyl (H);X;X;X;X;X;Phospho (STY);X;X;X;X;X;X;X;X;X	XXXXXXXXXXPPPPPPPPPPPPPPPPPXXXX	SMFAVH(1)VSNPFTSAQRK	SMFAVH(44.3)VSNPFTSAQRK	6	2	-1.367	11024000	11024000	0	0	NaN	11024000	NaN	11024000	0	0						92	5695	286	286	58995	67920	178398	217144	178398
C8VDT4	290	C8VDT4	C8VDT4	tr|C8VDT4|C8VDT4_EMENI Uncharacterized protein OS=Emericella nidulans (strain FGSC A4 / ATCC 38163 / CBS 112.46 / NRRL 194 / M139) OX=227321 GN=ANIA_07812 PE=4 SV=1	1	68.8931	0.0101034	68.893	7.1136	68.893	1	68.8931	0.0101034	68.893		1	H	LQTALRTSNSLNVITHTLVKKIDFDEEKRAT	X;X;X;X;X;X;X;X;X;X;X;X;X;X;Phospho (STY);Histidine Methyl (H);Phospho (STY);X;X;X;X;X;X;X;X;X;X;X;X;X;X	XXXXXXPPPPPPPPPPPPPPXXXXXXXXXXX	TSNSLNVITH(1)TLVK	TSNSLNVITH(68.89)TLVK	10	2	1.9196	69611000	69611000	0	0	0.053378	69611000	0.053378	69611000	0	0						8	997	290	290	66035	76175	199944	243277	199944
C8VLL3	294	C8VLL3	C8VLL3	tr|C8VLL3|C8VLL3_EMENI Glucoamylase OS=Emericella nidulans (strain FGSC A4 / ATCC 38163 / CBS 112.46 / NRRL 194 / M139) OX=227321 GN=ANIA_11143 PE=3 SV=1	1	75.294	0.0216419	75.294	20.686	75.294	1	75.294	0.0216419	75.294		1	H	DDVTFQPCSARALANHYRVVDAFRDLYDINA	X;X;X;X;X;X;X;X;X;X;X;X;X;X;X;Histidine Methyl (H);Phospho (STY);X;X;X;X;X;X;X;X;X;X;X;X;X;X	XXXXXXXXXXXPPPPPPPPPPPPPXXXXXXX	ALANH(1)YRVVDAFR	ALANH(75.29)YRVVDAFR	5	2	-2.8655	25763000	25763000	0	0	NaN	25763000	NaN	25763000	0	0						12	1472	294	294	3299	3717	9998	12101	9998
C8VEZ9	298	C8VEZ9	C8VEZ9	tr|C8VEZ9|C8VEZ9_EMENI RNA12 protein, putative (AFU_orthologue AFUA_1G07350) OS=Emericella nidulans (strain FGSC A4 / ATCC 38163 / CBS 112.46 / NRRL 194 / M139) OX=227321 GN=ANIA_10634 PE=4 SV=1	1	44.1881	0.0132691	44.188	30.525	44.188	1	44.1881	0.0132691	44.188		1	H	ERKIRLSMIKDWLLSHPRLVIPAVAALIAAI	X;X;X;X;X;X;Phospho (STY);Oxidation (M);X;X;X;X;X;X;Phospho (STY);Histidine Methyl (H);X;X;X;X;X;X;X;X;X;X;X;X;X;X;X	XXXPPPPPPPPPPPPPPPXXXXXXXXXXXXX	IRLSMIKDWLLSH(1)PR	IRLSMIKDWLLSH(44.19)PR	13	2	0.30114	5196900	5196900	0	0	NaN	5196900	NaN	5196900	0	0						9	1041	298	298	31280	35608	93841	115264	93841
C8VRL7	333	C8VRL7	C8VRL7	tr|C8VRL7|C8VRL7_EMENI Uncharacterized protein OS=Emericella nidulans (strain FGSC A4 / ATCC 38163 / CBS 112.46 / NRRL 194 / M139) OX=227321 GN=ANIA_01404 PE=4 SV=1	1	67.7257	0.0134224	67.726	34.992	67.726	1	67.7257	0.0134224	67.726		1	H	GQQCLEHELVLEHKEHAYVLATLVSNLEKDF	X;X;X;X;X;X;X;X;X;X;X;X;X;X;X;Histidine Methyl (H);X;X;X;X;X;Phospho (STY);X;X;Phospho (STY);X;X;X;X;X;X	XXXXXXXXXXXXXXPPPPPPPPPPPPPPPXX	EH(1)AYVLATLVSNLEK	EH(67.73)AYVLATLVSNLEK	2	2	3.7707	34009000	34009000	0	0	0.40173	34009000	0.40173	34009000	0	0						19	1804	333	333	13646	15572	40617	49336	40617
Q5B5R9	339	Q5B5R9	Q5B5R9	tr|Q5B5R9|Q5B5R9_EMENI Alpha-ketoglutarate-dependent taurine dioxygenase (AFU_orthologue AFUA_3G01010) OS=Emericella nidulans (strain FGSC A4 / ATCC 38163 / CBS 112.46 / NRRL 194 / M139) OX=227321 GN=ANIA_04111 PE=4 SV=1	1	67.5628	0.0200421	67.563	18.767	67.563	1	67.5628	0.0200421	67.563		1	H	ALWDNRWDYEGSEPRHGTRVTALAEKPFFDP	X;X;X;X;X;X;X;X;X;X;X;X;X;X;X;Histidine Methyl (H);X;Phospho (STY);X;X;Phospho (STY);X;X;X;X;X;X;X;X;X;X	XXXXXXXXXXXXXXXPPPPPPPPPPPXXXXX	H(1)GTRVTALAEK	H(67.56)GTRVTALAEK	1	2	1.9893	7738100	7738100	0	0	NaN	7738100	NaN	7738100	0	0						75	4910	339	339	26074	29696	75610	92433	75610
Q5B0V1	340	Q5B0V1	Q5B0V1	tr|Q5B0V1|Q5B0V1_EMENI Nuclear migration protein, putative (AFU_orthologue AFUA_2G07730) OS=Emericella nidulans (strain FGSC A4 / ATCC 38163 / CBS 112.46 / NRRL 194 / M139) OX=227321 GN=ANIA_05829 PE=4 SV=1	1	56.3592	0.0146665	56.359	32.068	56.359	1	56.3592	0.0146665	56.359		2	H	PQSPEALPEERPISVHSQMSHTMSSKARKIL	X;X;X;X;X;X;X;X;X;X;X;X;X;X;X;Histidine Methyl (H);X;X;X;X;Histidine Methyl (H);X;Oxidation (M);X;X;X;X;X;X;X;X	XXXXXXXXXXXPPPPPPPPPPPPPPPXXXXX	PISVH(1)SQMSH(1)TMSSK	PISVH(56.36)SQMSH(56.36)TMSSK	5	2	-0.524	73440000	0	73440000	0	NaN	73440000	NaN	0	73440000	0						63	4055	340	340	49845	57627	152711	186714	152711
C8V4I7	343	C8V4I7	C8V4I7	tr|C8V4I7|C8V4I7_EMENI Uncharacterized protein OS=Emericella nidulans (strain FGSC A4 / ATCC 38163 / CBS 112.46 / NRRL 194 / M139) OX=227321 GN=ANIA_07889 PE=4 SV=1	0.989901	19.913	0.0140662	48.64	29.397	48.64	0.989901	19.913	0.0140662	48.64		1	H	PNLTIDPPDPRLLRVHSAIAHIMKLSGAGDY	X;X;X;X;X;X;X;X;X;X;X;X;X;X;X;Histidine Methyl (H);Phospho (STY);X;X;X;X;X;Oxidation (M);X;X;X;X;X;X;X;X	XXXXXXXXXXXPPPPPPPPPPPPPXXXXXXX	LLRVH(0.99)SAIAH(0.01)IMK	LLRVH(19.91)SAIAH(-19.91)IMK	5	2	-4.1626	0	0	0	0	NaN	0	NaN	0	0	0						4	354	343	343	39041	44166	117606	144175	117606
Q5B0V1	345	Q5B0V1	Q5B0V1	tr|Q5B0V1|Q5B0V1_EMENI Nuclear migration protein, putative (AFU_orthologue AFUA_2G07730) OS=Emericella nidulans (strain FGSC A4 / ATCC 38163 / CBS 112.46 / NRRL 194 / M139) OX=227321 GN=ANIA_05829 PE=4 SV=1	1	56.3592	0.0146665	56.359	32.068	56.359	1	56.3592	0.0146665	56.359		2	H	ALPEERPISVHSQMSHTMSSKARKILGLSLD	X;X;X;X;X;X;X;X;X;X;Histidine Methyl (H);X;X;X;X;Histidine Methyl (H);X;Oxidation (M);X;X;X;X;X;X;X;X;X;X;X;X;X	XXXXXXPPPPPPPPPPPPPPPXXXXXXXXXX	PISVH(1)SQMSH(1)TMSSK	PISVH(56.36)SQMSH(56.36)TMSSK	10	2	-0.524	73440000	0	73440000	0	NaN	73440000	NaN	0	73440000	0						64	4055	345	345	49845	57627	152711	186714	152711
Q5ATU7	346	Q5ATU7	Q5ATU7	tr|Q5ATU7|Q5ATU7_EMENI 14-alpha sterol demethylase OS=Emericella nidulans (strain FGSC A4 / ATCC 38163 / CBS 112.46 / NRRL 194 / M139) OX=227321 GN=ANIA_08283 PE=3 SV=1	1	68.5575	0.00689577	68.557	42.441	68.557	1	68.5575	0.00689577	68.557		1	H	EELYQEQLKVLGSDMHMTYDDLQKLELHSKI	X;X;X;X;X;X;X;X;X;X;X;X;X;X;X;Histidine Methyl (H);X;Phospho (STY);X;X;X;X;X;X;X;X;X;X;X;X;X	XXXXXXXXXPPPPPPPPPPPPPPPXXXXXXX	VLGSDMH(1)MTYDDLQK	VLGSDMH(68.56)MTYDDLQK	7	2	-3.1289	0	0	0	0	0	0	0	0	0	0						42	2891	346	346	69924	80556	212429	258715	212429
Q5B9H5	370	Q5B9H5	Q5B9H5	tr|Q5B9H5|Q5B9H5_EMENI Uncharacterized protein OS=Emericella nidulans (strain FGSC A4 / ATCC 38163 / CBS 112.46 / NRRL 194 / M139) OX=227321 GN=ANIA_02805 PE=4 SV=1	1	62.2	0.0157918	62.2	9.0299	62.2	1	62.2	0.0157918	62.2		1	H	AAANELQRRIILSQYHVRVNSAATAQSPQES	X;X;X;X;X;X;X;X;X;X;X;X;X;X;Phospho (STY);Histidine Methyl (H);X;X;X;X;X;X;X;X;X;X;X;X;X;X;X	XXXXXXXXXPPPPPPPPPXXXXXXXXXXXXX	IILSQYH(1)VR	IILSQYH(62.2)VR	7	2	-1.97	0	0	0	0	0	0	0	0	0	0						87	5523	370	370	29373	33425	87713	107642	87713
Q5AWE1	390	Q5AWE1	Q5AWE1	tr|Q5AWE1|Q5AWE1_EMENI Uncharacterized protein OS=Emericella nidulans (strain FGSC A4 / ATCC 38163 / CBS 112.46 / NRRL 194 / M139) OX=227321 GN=ANIA_07389 PE=3 SV=1	1	72.6431	0.0189984	72.643	29.779	72.643	1	72.6431	0.0189984	72.643			H	LVDIYQDRLDLDASYHRALTRGNGFDNITRT	X;X;X;X;X;X;X;X;X;X;X;X;X;X;X;Histidine Methyl (H);X;X;X;X;X;X;X;X;X;X;X;X;X;X;X	XXXXXXXXPPPPPPPPPPPPPXXXXXXXXXX	LDLDASYH(1)RALTR	LDLDASYH(72.64)RALTR	8	2	1.7581	96180000	96180000	0	0	NaN	96180000	NaN	96180000	0	0						49	3305	390	390	35505	40270	106938	131046	106938
Q5AR54	391	Q5AR54	Q5AR54	sp|Q5AR54|ASQK_EMENI Nonribosomal peptide synthetase asqK OS=Emericella nidulans (strain FGSC A4 / ATCC 38163 / CBS 112.46 / NRRL 194 / M139) OX=227321 GN=asqK PE=1 SV=1	1	42.2418	0.0178072	42.242	25.362	42.242	1	42.2418	0.0178072	42.242		1	H	QRITSETDLRVIGRSHTARLRLVDPANYNRL	X;X;X;X;Phospho (STY);X;X;X;X;X;X;X;X;X;X;Histidine Methyl (H);X;X;X;X;X;X;X;X;X;X;X;X;X;X;X	XXPPPPPPPPPPPPPPPPPXXXXXXXXXXXX	ITSETDLRVIGRSH(1)TAR	ITSETDLRVIGRSH(42.24)TAR	14	3	-0.77372	0	0	0	0	NaN	0	NaN	0	0	0						35	2526	391	391	31954	36356	95786	117614	95786
Q5B5G9	397	Q5B5G9	Q5B5G9	tr|Q5B5G9|Q5B5G9_EMENI LMBR1 domain protein (AFU_orthologue AFUA_1G06071) OS=Emericella nidulans (strain FGSC A4 / ATCC 38163 / CBS 112.46 / NRRL 194 / M139) OX=227321 GN=ANIA_04211 PE=4 SV=1	1	53.4532	0.00609883	53.453	41.665	53.453	1	53.4532	0.00609883	53.453		1	H	IAPRLSVVTMSIVSYHERPAPVGFGRQVIAS	X;X;X;X;X;Phospho (STY);X;X;X;Oxidation (M);X;X;X;X;X;Histidine Methyl (H);X;X;X;X;X;X;X;X;X;X;X;X;X;X;X	PPPPPPPPPPPPPPPPPPXXXXXXXXXXXXX	SIAPRLSVVTMSIVSYH(1)ER	SIAPRLSVVTMSIVSYH(53.45)ER	17	3	2.2054	40794000	40794000	0	0	NaN	40794000	NaN	40794000	0	0						72	4866	397	397	57678	66436	174847	212884	174847
Q5ASS7	417	Q5ASS7	Q5ASS7	tr|Q5ASS7|Q5ASS7_EMENI Glutamyl-tRNA(Gln) amidotransferase, subunit A (AFU_orthologue AFUA_7G06800) OS=Emericella nidulans (strain FGSC A4 / ATCC 38163 / CBS 112.46 / NRRL 194 / M139) OX=227321 GN=ANIA_08653 PE=4 SV=1	1	61.3533	0.00414472	61.353	22.719	61.353	1	61.3533	0.00414472	61.353		1	H	TEPSTEANKILLSFLHKLSRFLGNATVSPLD	X;X;X;X;X;X;X;X;X;X;X;X;Phospho (STY);X;X;Histidine Methyl (H);X;X;Phospho (STY);X;X;X;X;X;X;X;X;X;X;X;X	XXXXXXXXXPPPPPPPPPPPXXXXXXXXXXX	ILLSFLH(1)KLSR	ILLSFLH(61.35)KLSR	7	3	-0.91625	0	0	0	0	NaN	0	NaN	0	0	0						40	2759	417	417	29970	34081	89713	110169	89713
C8VMG0	426	C8VMG0	C8VMG0	tr|C8VMG0|C8VMG0_EMENI Valyl-tRNA synthetase (AFU_orthologue AFUA_8G04800) OS=Emericella nidulans (strain FGSC A4 / ATCC 38163 / CBS 112.46 / NRRL 194 / M139) OX=227321 GN=ANIA_10195 PE=3 SV=1	1	46.4619	0.0215445	46.462	32.227	46.462	1	46.4619	0.0215445	46.462			H	VIEMLKEKGLYVKWEHNPMKIPRCAKSNDVI	X;X;X;X;X;X;X;X;X;X;Phospho (STY);X;X;X;X;Histidine Methyl (H);X;X;Oxidation (M);X;X;X;X;X;X;X;X;X;X;X;X	XXXXXXXXPPPPPPPPPPPPXXXXXXXXXXX	GLYVKWEH(1)NPMK	GLYVKWEH(46.46)NPMK	8	2	-3.7696	56307000	56307000	0	0	NaN	56307000	NaN	56307000	0	0						15	1543	426	426	23174	26306	66564	81236	66564
Q5B8I7	430	Q5B8I7	Q5B8I7	tr|Q5B8I7|Q5B8I7_EMENI DUF1212 domain membrane protein Prm10, putative (AFU_orthologue AFUA_3G13940) OS=Emericella nidulans (strain FGSC A4 / ATCC 38163 / CBS 112.46 / NRRL 194 / M139) OX=227321 GN=ANIA_03143 PE=4 SV=1	1	93.0956	0.00575912	96.342	73.022	93.096	1	93.0956	0.00575912	96.342			H	LLILCKALMKFGAPTHRLEEYMKMTARVLEI	X;X;X;X;X;X;X;X;X;X;X;X;X;X;X;Histidine Methyl (H);X;X;X;X;X;Oxidation (M);X;X;X;X;X;X;X;X;X	XXXXXXXXXXPPPPPPPPPPPPPXXXXXXXX	FGAPTH(1)RLEEYMK	FGAPTH(93.1)RLEEYMK	6	2	-0.62909	7848300000	7848300000	0	0	NaN	7772600000	NaN	7772600000	0	0						84	5360	430	430	17730	20176	51564;51565;51566;51567;51568;51569;51570;51571;51572	62562;62563;62564;62565;62566;62567;62568;62569;62570	51572
Q5B7K4	438	Q5B7K4	Q5B7K4	tr|Q5B7K4|Q5B7K4_EMENI Uncharacterized protein OS=Emericella nidulans (strain FGSC A4 / ATCC 38163 / CBS 112.46 / NRRL 194 / M139) OX=227321 GN=ANIA_03476 PE=4 SV=1	1	41.4823	0.00288328	41.482	29.63	41.482	1	41.4823	0.00288328	41.482		1	H	RTAMEKSAPVIYETIHEALCEEDPRVLGSKE	X;X;X;X;X;X;Phospho (STY);X;X;X;X;X;X;X;X;Histidine Methyl (H);X;X;X;X;X;X;X;X;X;X;X;X;Phospho (STY);X;X	XXXXXXPPPPPPPPPPPPPPPPPPPPPPPPP	SAPVIYETIH(1)EALCEEDPRVLGSKER	SAPVIYETIH(41.48)EALCEEDPRVLGSKER	10	3	0.25151	68450000	68450000	0	0	NaN	68450000	NaN	68450000	0	0						83	5223	438	438	55991	64474	170303;170304	207509;207510	170304
Q5ARL7	459	Q5ARL7	Q5ARL7	tr|Q5ARL7|Q5ARL7_EMENI Oxysterol binding protein (Osh1), putative (AFU_orthologue AFUA_7G02480) OS=Emericella nidulans (strain FGSC A4 / ATCC 38163 / CBS 112.46 / NRRL 194 / M139) OX=227321 GN=ANIA_09063 PE=4 SV=1	1	42.7433	0.0214727	42.743	17.357	42.743	1	42.7433	0.0214727	42.743		2	H	DKTRFEIYGKSSVKYHLKANHVVEAKRWFWT	X;X;X;X;X;X;X;X;X;X;X;X;X;X;Phospho (STY);Histidine Methyl (H);X;X;X;X;Histidine Methyl (H);X;X;X;X;X;X;X;X;X;X	XXXXXXXXXXXXXXPPPPPPPPPPPPXXXXX	YH(1)LKANH(1)VVEAK	YH(42.74)LKANH(42.74)VVEAK	2	2	-1.7329	15527000	0	15527000	0	NaN	15527000	NaN	0	15527000	0						37	2592	459	459	74919	86266	227994	277984	227994
Q5ARL7	464	Q5ARL7	Q5ARL7	tr|Q5ARL7|Q5ARL7_EMENI Oxysterol binding protein (Osh1), putative (AFU_orthologue AFUA_7G02480) OS=Emericella nidulans (strain FGSC A4 / ATCC 38163 / CBS 112.46 / NRRL 194 / M139) OX=227321 GN=ANIA_09063 PE=4 SV=1	1	42.7433	0.0214727	42.743	17.357	42.743	1	42.7433	0.0214727	42.743		2	H	EIYGKSSVKYHLKANHVVEAKRWFWTLNNAI	X;X;X;X;X;X;X;X;X;Phospho (STY);Histidine Methyl (H);X;X;X;X;Histidine Methyl (H);X;X;X;X;X;X;X;X;X;X;X;X;X;X;X	XXXXXXXXXPPPPPPPPPPPPXXXXXXXXXX	YH(1)LKANH(1)VVEAK	YH(42.74)LKANH(42.74)VVEAK	7	2	-1.7329	15527000	0	15527000	0	NaN	15527000	NaN	0	15527000	0						38	2592	464	464	74919	86266	227994	277984	227994
Q5BD92	469	Q5BD92	Q5BD92	tr|Q5BD92|Q5BD92_EMENI RING finger protein (AFU_orthologue AFUA_8G04840) OS=Emericella nidulans (strain FGSC A4 / ATCC 38163 / CBS 112.46 / NRRL 194 / M139) OX=227321 GN=ANIA_01488 PE=4 SV=1	0.983555	17.7676	0.000235839	47.784	35.285	47.784	0.983555	17.7676	0.000235839	47.784		1	H	RIGFGAGRGDLFNNLHQQIHQGNGPWQPGMN	X;X;X;X;X;X;X;X;X;X;X;X;X;X;X;Histidine Methyl (H);X;X;X;X;X;X;X;X;X;X;X;X;X;Oxidation (M);X	XPPPPPPPPPPPPPPPPPPPPPPPPPPPPPP	IGFGAGRGDLFNNLH(0.984)QQIH(0.016)QGNGPWQPGMNPNPAGAR	IGFGAGRGDLFNNLH(17.77)QQIH(-17.77)QGNGPWQPGMNPNPAGAR	15	5	0.36545	4882200	4882200	0	0	NaN	4882200	NaN	4882200	0	0						101	6172	469	469	28844	32820	85602	104967	85602
Q5BDW5	505	Q5BDW5	Q5BDW5	tr|Q5BDW5|Q5BDW5_EMENI C2H2 transcription factor, putative (AFU_orthologue AFUA_1G10080) OS=Emericella nidulans (strain FGSC A4 / ATCC 38163 / CBS 112.46 / NRRL 194 / M139) OX=227321 GN=ANIA_01265 PE=4 SV=1	1	55.5494	0.00596642	55.549	19.606	55.549	1	55.5494	0.00596642	55.549		2	H	SVCGKLFARQATLERHERSHRGEKPYKCTVC	X;X;X;X;X;X;X;X;X;X;X;X;X;X;X;Histidine Methyl (H);X;X;X;Histidine Methyl (H);X;X;X;X;X;X;X;X;X;X;X	XXXXXXXXXPPPPPPPPPPPPXXXXXXXXXX	QATLERH(1)ERSH(1)R	QATLERH(55.55)ERSH(55.55)R	7	2	-0.46357	0	0	0	0	NaN	0	NaN	0	0	0						102	6299	505	505	51828	59875	158859	193939	158859
Q5BDW5	509	Q5BDW5	Q5BDW5	tr|Q5BDW5|Q5BDW5_EMENI C2H2 transcription factor, putative (AFU_orthologue AFUA_1G10080) OS=Emericella nidulans (strain FGSC A4 / ATCC 38163 / CBS 112.46 / NRRL 194 / M139) OX=227321 GN=ANIA_01265 PE=4 SV=1	1	55.5494	0.00596642	55.549	19.606	55.549	1	55.5494	0.00596642	55.549		2	H	KLFARQATLERHERSHRGEKPYKCTVCGKSF	X;X;X;X;X;X;X;X;X;X;X;Histidine Methyl (H);X;X;X;Histidine Methyl (H);X;X;X;X;X;X;X;X;X;X;X;X;X;X;X	XXXXXPPPPPPPPPPPPXXXXXXXXXXXXXX	QATLERH(1)ERSH(1)R	QATLERH(55.55)ERSH(55.55)R	11	2	-0.46357	0	0	0	0	NaN	0	NaN	0	0	0						103	6299	509	509	51828	59875	158859	193939	158859
C8VAK3	527	C8VAK3	C8VAK3	tr|C8VAK3|C8VAK3_EMENI MYB DNA-binding domain protein (AFU_orthologue AFUA_3G07070) OS=Emericella nidulans (strain FGSC A4 / ATCC 38163 / CBS 112.46 / NRRL 194 / M139) OX=227321 GN=ANIA_04813 PE=4 SV=1	0.999878	39.1271	0.0167334	58.37	45.793	58.37	0.999878	39.1271	0.0167334	58.37		1	H	LPAVDRQIPSNRSSQHTLFHERVPSLDDGPT	X;X;X;X;X;X;X;X;X;X;X;X;X;X;X;Histidine Methyl (H);X;X;X;X;X;X;X;X;X;X;X;X;X;X;X	XXXXXXXXXXXXPPPPPPPPPPXXXXXXXXX	SSQH(1)TLFHER	SSQH(39.13)TLFH(-39.13)ER	4	3	-0.37592	0	0	0	0	NaN	0	NaN	0	0	0						7	758	527	527	60581	69837	182693	222173	182693
Q5BGM8	534	Q5BGM8	Q5BGM8	tr|Q5BGM8|Q5BGM8_EMENI Cell cycle inhibitor Nif1, putative (AFU_orthologue AFUA_1G02760) OS=Emericella nidulans (strain FGSC A4 / ATCC 38163 / CBS 112.46 / NRRL 194 / M139) OX=227321 GN=ANIA_00302 PE=4 SV=1	1	47.8938	0.0109426	47.894	6.1895	47.894	1	47.8938	0.0109426	47.894			H	GIQLHEKGSLNESTYHLRVAAKQDHPVAMLL	X;X;X;X;X;X;X;X;X;X;X;X;X;Phospho (STY);Phospho (STY);Histidine Methyl (H);X;X;X;X;X;X;X;X;X;X;X;X;X;X;X	XXXXXXXPPPPPPPPPPPPPPPXXXXXXXXX	GSLNESTYH(1)LRVAAK	GSLNESTYH(47.89)LRVAAK	9	2	0.6467	179370000	179370000	0	0	NaN	179370000	NaN	179370000	0	0						110	6794	534	534	24187	27556	69606	84998	69606
Q5AZH0	560	Q5AZH0	Q5AZH0	tr|Q5AZH0|Q5AZH0_EMENI Midasin OS=Emericella nidulans (strain FGSC A4 / ATCC 38163 / CBS 112.46 / NRRL 194 / M139) OX=227321 GN=ANIA_06310 PE=3 SV=1	1	58.9807	0.016061	58.981	6.2646	58.981	1	58.9807	0.016061	58.981		1	H	TTLSDSLALKVAEALHISPQRARFCLHERTP	X;X;X;X;X;X;X;X;X;X;X;X;X;X;X;Histidine Methyl (H);X;Phospho (STY);X;X;X;X;X;X;X;X;X;X;X;X;X	XXXXXXXXXXPPPPPPPPPPPXXXXXXXXXX	VAEALH(1)ISPQR	VAEALH(58.98)ISPQR	6	2	-3.0415	0	0	0	0	0	0	0	0	0	0						59	3792	560	560	67307	77612	203888	248165	203888
H9D0P5	571	H9D0P5	H9D0P5	tr|H9D0P5|H9D0P5_EMENI Cytochrome c oxidase subunit 1 OS=Emericella nidulans (strain FGSC A4 / ATCC 38163 / CBS 112.46 / NRRL 194 / M139) OX=227321 GN=ANID_20014 PE=3 SV=1	1	175.376	0.0183682	175.38	167.04	175.38	1	175.376	0.0183682	175.38		1	H	NNSSLEWCLTSPPKPHAFASLPLQS______	X;X;X;X;X;X;X;X;X;X;X;X;X;X;X;Histidine Methyl (H);X;X;X;X;X;X;X;X;X;X;X;X;X;X;X	XXXXXXXXXXXXXXPPPPPPPPPPPXXXXXX	PH(1)AFASLPLQS	PH(175.38)AFASLPLQS	2	2	0.51415	3989200000	3989200000	0	0	NaN	3971000000	NaN	3971000000	0	0						28	2235	571	571	49602	57352	151857;151858;151859;151860	185696;185697;185698;185699;185700	151860
C8VLV2	589	C8VLV2	C8VLV2	tr|C8VLV2|C8VLV2_EMENI Uncharacterized protein OS=Emericella nidulans (strain FGSC A4 / ATCC 38163 / CBS 112.46 / NRRL 194 / M139) OX=227321 GN=ANIA_08871 PE=4 SV=1	0.5	0	0.0166497	44.765	13.168	40.589	0.5	0	0.0166497	44.765		1	H	IHEWARQHPRMLEAGHYHETWGVSERKGSWA	X;X;X;X;X;X;X;X;X;X;Oxidation (M);X;X;X;X;Histidine Methyl (H);X;X;X;Phospho (STY);X;X;X;X;X;X;X;X;X;X;X	XXXXXXXXXXPPPPPPPPPPPPPPPPXXXXX	MLEAGH(0.5)YH(0.5)ETWGVSER	MLEAGH(0)YH(0)ETWGVSER	6	2	0.45903	1338100000	1338100000	0	0	NaN	1338100000	NaN	1338100000	0	0						13	1490	589	589	44458	50881	134720;134721	164950;164951	134721
C8VLV2	591	C8VLV2	C8VLV2	tr|C8VLV2|C8VLV2_EMENI Uncharacterized protein OS=Emericella nidulans (strain FGSC A4 / ATCC 38163 / CBS 112.46 / NRRL 194 / M139) OX=227321 GN=ANIA_08871 PE=4 SV=1	0.5	0	0.0166497	44.765	13.168	40.589	0.5	0	0.0166497	44.765		1	H	EWARQHPRMLEAGHYHETWGVSERKGSWAV_	X;X;X;X;X;X;X;X;X;X;X;X;X;X;X;X;X;X;X;X;X;X;X;X;X;X;X;X;X;X;X	XXXXXXXXXXXXXXXXXXXXXXXXXXXXXXX	MLEAGH(0.5)YH(0.5)ETWGVSER	MLEAGH(0)YH(0)ETWGVSER	8	2	0.45903	1338100000	1338100000	0	0	NaN	1338100000	NaN	1338100000	0	0						14	1490	591	591	44458	50881	134720;134721	164950;164951	134721
Q5B6T7	615	Q5B6T7	Q5B6T7	tr|Q5B6T7|Q5B6T7_EMENI Miscellaneous Zn(II)2Cys6 transcription factor (Eurofung) OS=Emericella nidulans (strain FGSC A4 / ATCC 38163 / CBS 112.46 / NRRL 194 / M139) OX=227321 GN=ANIA_03743 PE=4 SV=1	1	46.0014	0.0181798	46.001	17.275	46.001	1	46.0014	0.0181798	46.001		2	H	HRSASNPGGPKYTASHAVAAHSLRSTSVPPN	X;X;X;X;X;X;X;X;X;X;X;X;X;X;Phospho (STY);Histidine Methyl (H);X;X;X;X;Histidine Methyl (H);Phospho (STY);X;X;X;X;X;X;X;X;X	XXXXXXXXXXXPPPPPPPPPPPPPXXXXXXX	YTASH(1)AVAAH(1)SLR	YTASH(46)AVAAH(46)SLR	5	2	-0.48876	65981000	0	65981000	0	0.58729	65981000	0.58729	0	65981000	0						79	5101	615	615	76303	87863	232438	283515	232438
Q5B6T7	620	Q5B6T7	Q5B6T7	tr|Q5B6T7|Q5B6T7_EMENI Miscellaneous Zn(II)2Cys6 transcription factor (Eurofung) OS=Emericella nidulans (strain FGSC A4 / ATCC 38163 / CBS 112.46 / NRRL 194 / M139) OX=227321 GN=ANIA_03743 PE=4 SV=1	1	46.0014	0.0181798	46.001	17.275	46.001	1	46.0014	0.0181798	46.001		2	H	NPGGPKYTASHAVAAHSLRSTSVPPNNPVYS	X;X;X;X;X;X;X;X;X;Phospho (STY);Histidine Methyl (H);X;X;X;X;Histidine Methyl (H);Phospho (STY);X;X;X;X;X;X;X;X;X;X;X;X;X;X	XXXXXXPPPPPPPPPPPPPXXXXXXXXXXXX	YTASH(1)AVAAH(1)SLR	YTASH(46)AVAAH(46)SLR	10	2	-0.48876	65981000	0	65981000	0	0.58729	65981000	0.58729	0	65981000	0						80	5101	620	620	76303	87863	232438	283515	232438
Q5B993	662	Q5B993	Q5B993	sp|Q5B993|ATG11_EMENI Autophagy-related protein 11 OS=Emericella nidulans (strain FGSC A4 / ATCC 38163 / CBS 112.46 / NRRL 194 / M139) OX=227321 GN=atg11 PE=3 SV=2	1	57.1357	0.00588501	57.136	33.304	57.136	1	57.1357	0.00588501	57.136		1	H	EELEEELDRLTDSRDHEKQDADERMHQLELE	X;X;X;X;X;X;X;X;X;X;X;X;X;X;X;Histidine Methyl (H);X;X;X;X;X;X;X;X;X;X;X;X;X;X;X	XXXXXXXXXPPPPPPPPPPPPPPPXXXXXXX	LTDSRDH(1)EKQDADER	LTDSRDH(57.14)EKQDADER	7	3	0.087353	0	0	0	0	NaN	0	NaN	0	0	0						86	5492	662	662	41989	47538	126132	154517	126132
Q5BBL8	671	Q5BBL8	Q5BBL8	tr|Q5BBL8|Q5BBL8_EMENI Uncharacterized protein OS=Emericella nidulans (strain FGSC A4 / ATCC 38163 / CBS 112.46 / NRRL 194 / M139) OX=227321 GN=ANIA_02062 PE=3 SV=1	1	186.019	1.807e-32	190.46	175.99	186.02	1	186.019	1.807e-32	190.46		1	H	YGSAPPTEEDDDEYGHDEL____________	X;X;X;X;X;X;X;X;X;X;X;X;X;X;X;Histidine Methyl (H);X;X;X;X;X;X;X;X;X;X;X;X;X;X;X	PPPPPPPPPPPPPPPPPPPXXXXXXXXXXXX	LYGSAPPTEEDDDEYGH(1)DEL	LYGSAPPTEEDDDEYGH(186.02)DEL	17	2	0.15485	91363000	91363000	0	0	0.081651	91363000	0.081651	91363000	0	0						97	5891	671	671	43313	49028	130253;130254	159647;159648	130254
Q5B9M3	766	Q5B9M3	Q5B9M3	tr|Q5B9M3|Q5B9M3_EMENI Uncharacterized protein OS=Emericella nidulans (strain FGSC A4 / ATCC 38163 / CBS 112.46 / NRRL 194 / M139) OX=227321 GN=ANIA_02757 PE=4 SV=1	1	43.0988	0.00134933	43.099	36.665	43.099	1	43.0988	0.00134933	43.099		1	H	LSRPAGTPEEPIGRGHPFPPPGIPLPTPAKV	X;X;X;X;X;X;X;X;X;X;X;X;X;X;X;Histidine Methyl (H);X;X;X;X;X;X;X;X;X;X;X;X;X;X;X	XXXPPPPPPPPPPPPPPPPPPPPPPPPPPPX	PAGTPEEPIGRGH(1)PFPPPGIPLPTPAK	PAGTPEEPIGRGH(43.1)PFPPPGIPLPTPAK	13	4	0.42946	8383500	8383500	0	0	NaN	8383500	NaN	8383500	0	0						89	5543	766	766	48723	56391	148801	182031	148801
Q5BCY6	856	Q5BCY6	Q5BCY6	tr|Q5BCY6|Q5BCY6_EMENI Uncharacterized protein OS=Emericella nidulans (strain FGSC A4 / ATCC 38163 / CBS 112.46 / NRRL 194 / M139) OX=227321 GN=ANIA_01594 PE=4 SV=1	1	57.4919	0.00697736	61.212	51.651	57.492	1	57.4919	0.00697736	61.212		1	H	FQTCEEKYVAEAMCRHLAVMCRMYNDYGSLA	X;X;X;X;X;X;X;X;X;X;X;X;Oxidation (M);X;X;Histidine Methyl (H);X;X;X;X;X;X;X;X;X;X;X;X;X;X;X	XXXXXXXPPPPPPPPPPPPPPPXXXXXXXXX	YVAEAMCRH(1)LAVMCR	YVAEAMCRH(57.49)LAVMCR	9	2	-3.8197	67948000	67948000	0	0	NaN	67948000	NaN	67948000	0	0						99	6128	856	856	76464	88040	232905;232906	284060;284061	232906
C8VPJ2	865	C8VPJ2	C8VPJ2	tr|C8VPJ2|C8VPJ2_EMENI DNA-directed RNA polymerase subunit OS=Emericella nidulans (strain FGSC A4 / ATCC 38163 / CBS 112.46 / NRRL 194 / M139) OX=227321 GN=ANIA_10316 PE=3 SV=1	1	51.2109	0.0206177	51.211	19.143	51.211	1	51.2109	0.0206177	51.211			H	RNSFFSGLLPYEFIFHAMSGREGLVDTAVKT	X;X;Phospho (STY);X;X;X;X;X;X;X;X;X;X;X;X;Histidine Methyl (H);X;X;X;X;X;X;X;X;X;X;X;X;X;X;X	XPPPPPPPPPPPPPPPPPPPPXXXXXXXXXX	NSFFSGLLPYEFIFH(1)AMSGR	NSFFSGLLPYEFIFH(51.21)AMSGR	15	2	-1.8307	5229100	5229100	0	0	NaN	5229100	NaN	5229100	0	0						18	1675	865	865	47804	55347	146274	179011	146274
Q5ATZ5	882	Q5ATZ5	Q5ATZ5	tr|Q5ATZ5|Q5ATZ5_EMENI Uncharacterized protein OS=Emericella nidulans (strain FGSC A4 / ATCC 38163 / CBS 112.46 / NRRL 194 / M139) OX=227321 GN=ANIA_08235 PE=4 SV=1	0.999831	37.7097	0.0223469	41.242	18.768	41.242	0.999831	37.7097	0.0223469	41.242			H	EAKHVALALKTMPYAHRYAQNDARSRNGARS	X;X;X;X;X;X;X;X;X;X;Phospho (STY);X;X;Phospho (STY);X;Histidine Methyl (H);X;X;X;X;X;X;X;X;X;X;X;X;X;X;X	XXXPPPPPPPPPPPPPPXXXXXXXXXXXXXX	HVALALKTMPYAH(1)R	H(-37.71)VALALKTMPYAH(37.71)R	13	2	1.9722	16549000	16549000	0	0	NaN	16549000	NaN	16549000	0	0						43	2916	882	882	27191	30980	80158	98158	80158
C8VJR7	1487	C8VJR7	C8VJR7	sp|C8VJR7|ALNA_EMENI Highly reducing polyketide synthase alnA OS=Emericella nidulans (strain FGSC A4 / ATCC 38163 / CBS 112.46 / NRRL 194 / M139) OX=227321 GN=alnA PE=1 SV=1	1	58.0902	0.00592099	58.09	31.944	58.09	1	58.0902	0.00592099	58.09		2	H	TKILHREGRVAIIRSHALPDERHFAATKGLL	X;X;X;X;X;X;X;X;X;X;X;X;X;X;Phospho (STY);Histidine Methyl (H);X;X;X;X;X;X;Histidine Methyl (H);X;X;X;X;X;X;X;X	XXXXXXXXXPPPPPPPPPPPPPPPPPPPXXX	VAIIRSH(1)ALPDERH(1)FAATK	VAIIRSH(58.09)ALPDERH(58.09)FAATK	7	3	-1.8391	34583000	0	34583000	0	NaN	34583000	NaN	0	34583000	0						10	1373	1487	1487	67440	77765	204297	248655	204297
C8VJR7	1494	C8VJR7	C8VJR7	sp|C8VJR7|ALNA_EMENI Highly reducing polyketide synthase alnA OS=Emericella nidulans (strain FGSC A4 / ATCC 38163 / CBS 112.46 / NRRL 194 / M139) OX=227321 GN=alnA PE=1 SV=1	1	58.0902	0.00592099	58.09	31.944	58.09	1	58.0902	0.00592099	58.09		2	H	GRVAIIRSHALPDERHFAATKGLLKEISFES	X;X;X;X;X;X;X;Phospho (STY);Histidine Methyl (H);X;X;X;X;X;X;Histidine Methyl (H);X;X;X;X;X;X;X;X;X;X;X;X;X;X;X	XXPPPPPPPPPPPPPPPPPPPXXXXXXXXXX	VAIIRSH(1)ALPDERH(1)FAATK	VAIIRSH(58.09)ALPDERH(58.09)FAATK	14	3	-1.8391	34583000	0	34583000	0	NaN	34583000	NaN	0	34583000	0						11	1373	1494	1494	67440	77765	204297	248655	204297
Q5AU19	1633	Q5AU19	Q5AU19	tr|Q5AU19|Q5AU19_EMENI PHD transcription factor (Rum1), putative (AFU_orthologue AFUA_5G03430) OS=Emericella nidulans (strain FGSC A4 / ATCC 38163 / CBS 112.46 / NRRL 194 / M139) OX=227321 GN=ANIA_08211 PE=4 SV=1	1	44.0521	0.017968	44.052	33.771	44.052	1	44.0521	0.017968	44.052		1	H	YSRTATGGPSGIDIDHSNPFGSSPRNLDDVF	X;X;X;X;X;X;X;X;X;X;X;X;X;X;X;Histidine Methyl (H);X;X;X;X;X;X;X;X;X;X;X;X;X;X;X	XXXPPPPPPPPPPPPPPPPPPPPPPXXXXXX	TATGGPSGIDIDH(1)SNPFGSSPR	TATGGPSGIDIDH(44.05)SNPFGSSPR	13	3	0.039951	10151000	10151000	0	0	0.071794	10151000	0.071794	10151000	0	0						44	2929	1633	1633	62444	71962	187942	228456	187942
Q5B027;Q5B1W7	1;1	Q5B027;Q5B1W7	Q5B027	tr|Q5B027|Q5B027_EMENI LPMO_10 Uncharacterized protein OS=Emericella nidulans (strain FGSC A4 / ATCC 38163 / CBS 112.46 / NRRL 194 / M139) OX=227321 GN=ANIA_06103 PE=4 SV=1;tr|Q5B1W7|Q5B1W7_EMENI LPMO_10 Uncharacterized protein OS=Emericella nidulans (stra	1	78.0978	0.00444297	78.098	63.891	78.098	1	78.0978	0.00444297	78.098		1	H	_______________HGYLTVPASRTRLGFE	X;X;X;X;X;X;X;X;X;X;X;X;X;X;X;Histidine Methyl (H);X;X;X;X;X;X;X;X;X;X;X;X;X;X;X	XXXXXXXXXXXXXXXPPPPPPPPPPXXXXXX	H(1)GYLTVPASR	H(78.1)GYLTVPASR	1	3	0.096481	0	0	0	0	NaN	0	NaN	0	0	0						62	3906;4233	1;1	1	26097	29723	75695	92576	75695
[truncated: 11 more columns]

## Sheet: N-term meth-His
Protein	N-term sequence	LFQ	TMT	Deep
C8V530	H(methy)GYVSNIVINGVSYR	x		x
Q5B027;Q5B1W7	H(methyl)GYLTVPASR	x
Q5B428	H(methyl)TVIVYPGYR	x	x	x
Q5AU55	H(methyl)MVMTNPVPYNFK			x
