# Supplementary material for: A seven-transmembrane methyltransferase catalysing N-terminal histidine methylation of lytic polysaccharide monooxygenases
Source: Research Square preprint supplement (doi:10.21203/rs.3.rs-2289157/v1), 2022-12-21
Supplement: Supplementary file 7 [file e224858a32e7471341be8a5d.xlsx]

## Sheet: Info
This sheet contains quantification of the Q5B428 N-terminal histidine methylated HTVIVYPGYR. The data was analyzed using Skyline output was used to produce Figure 1 and Figure S1.
	Sheet	Info
	Figure S1	PRM quantification used to generate Figure S1 from A. nidulans gene knockout experiments.
	Figure 2-3	PRM quantification used to generate graphs in Figure 2D,E and Figure 3C, D can be found here
	Figure 4	PRM quantiication used to generate graph in Figure 4A, B due to AN4663 truncation from AA1-224
	Reference	Reference and sample legend for Skyline analysis file.

## Sheet:  Figure S1
Q5B428	609.8351++	[methyl]HTVIVYPGYR
				y9 - 1067.5884+	y8 - 966.5407+	y7 - 867.4723+	y6 - 754.3883+	y5 - 655.3198+	y4 - 492.2565+
Strain	AspGD Gene KO	UniProt	Replicate	Peak Area	Peak Area	Peak Area	Peak Area	Peak Area	Peak Area		Total				AspGD	Uniprot	Strain number	Ref number
NID2531 #1	Reference	Reference	1	6084710	5.59288e+06	2.07511e+06	1.45935e+06	953149	689656		1.68549e+07				Ref	Ref	NID2531 #1	1
NID2531 #2	Reference	Reference	2	6.42116e+06	6.2216e+06	2.15944e+06	1600905	1.00902e+06	746488		1.81586e+07				Ref	Ref	NID2531 #2	2
NID2709 #1	AN2405	Q5BAM5	1	13970565	13680112	5493113	3.44612e+06	2413276	1.66806e+06		4.06712e+07				AN2405	Q5BAM5	NID2709 #1	3
NID2709 #2	AN2405	Q5BAM5	2	9863873	9749348	3.65648e+06	2481784	1.63091e+06	1.33778e+06		2.87202e+07				AN2405	Q5BAM5	NID2709 #2	4
NID2710 #1	AN3464	Q5B7L6	1	11228181	10741673	4587527	2723400	1.88816e+06	1.38326e+06		3.25522e+07				AN3464	Q5B7L6	NID2710 #1	5
NID2710 #2	AN3464	Q5B7L6	2	10900816	10632293	3887205	2.6069e+06	1.66664e+06	1.34534e+06		3.10392e+07				AN3464	Q5B7L6	NID2710 #2	6
NID2712 #1	AN10974	C8VBW6	1	9114474	8152517	3714049	2.04469e+06	1.59575e+06	1.01302e+06		2.56345e+07				AN10974	C8VBW6	NID2712 #1	7
NID2712 #2	AN10974	C8VBW6	2	7982095	7.82058e+06	3.41734e+06	1.8878e+06	1.40555e+06	801356		2.33147e+07				AN10974	C8VBW6	NID2712 #2	8
NID2713 #1	AN4663	Q5B467	1	1593.89	64416.7	63269.5	128642	68306.7	0		326229				AN4663	Q5B467	NID2713 #1	9
NID2713 #2	AN4663	Q5B467	2	0	2672.32	9210.13	36630.6	34491.4	0		83004.4				AN4663	Q5B467	NID2713 #2	10
NID2714 #1	AN2165	Q5BBB5	1	8955888	8462820	3.92337e+06	2.37858e+06	1.7692e+06	1.02254e+06		2.65124e+07				AN2165	Q5BBB5	NID2714 #1	11
NID2714 #2	AN2165	Q5BBB5	2	8693441	8096454	3577364	2.24949e+06	1.66171e+06	1.00499e+06		2.52834e+07				AN2165	Q5BBB5	NID2714 #2	12
NID2715 #1	AN0761	Q5BFB9	1	15075636	14336716	5.60901e+06	3.57112e+06	2.43134e+06	1.66785e+06		4.26917e+07				AN0761	Q5BFB9	NID2715 #1	13
NID2715 #2	AN0761	Q5BFB9	2	20100192	19869580	6875298	4756003	3.35018e+06	2.5233e+06		57474550				AN0761	Q5BFB9	NID2715 #2	14
NID2721 #1	AN1566	Q5BD14	1	22631992	22304704	7550082	5800862	3.69079e+06	2.94407e+06		64922504				AN1566	Q5BD14	NID2721 #1	15
NID2721 #2	AN1566	Q5BD14	2	14697039	14271987	5.03169e+06	3.55837e+06	2.49607e+06	1.96088e+06		4.2016e+07				AN1566	Q5BD14	NID2721 #2	16
NID2723 #1	AN7375	Q5AWF5	1	11262117	10861358	3703859	2738526	2.01798e+06	1565024		3.21489e+07				AN7375	Q5AWF5	NID2723 #1	17
NID2723 #2	AN7375	Q5AWF5	2	16525186	15649471	5.19268e+06	4.10147e+06	2.72287e+06	1.91522e+06		4.61069e+07				AN7375	Q5AWF5	NID2723 #2	18
NID2733 #1	AN0134	Q5BH46	1	25454998	22103932	7258994	5.43551e+06	3482175	3359366		6.7095e+07				AN0134	Q5BH46	NID2733 #1	19
NID2733 #2	AN0134	Q5BH46	2	9578205	7.29173e+06	2.60956e+06	1.93774e+06	1.27037e+06	1.08908e+06		2.37767e+07				AN0134	Q5BH46	NID2733 #2	20
NID2745 #1	AN8945	Q5ARY5	1	19743078	19225010	6148286	4.5364e+06	3.28627e+06	2687663		5.56267e+07				AN8945	Q5ARY5	NID2745 #1	21
NID2745 #2	AN8945	Q5ARY5	2	18731950	15187390	5107201	3886732	2.46779e+06	2.09507e+06		4.74761e+07				AN8945	Q5ARY5	NID2745 #2	22
NID2746 #1	AN9193	Q5AR87	1	35790204	32197620	10270217	8.15795e+06	4.27774e+06	4596036		95289767				AN9193	Q5AR87	NID2746 #1	23
NID2746 #2	AN9193	Q5AR87	2	18829140	17388230	5.65482e+06	4563262	2.91493e+06	2.31987e+06		5.16703e+07				AN9193	Q5AR87	NID2746 #2	24
NID2747 #1	AN4625	Q5B4A5	1	18242074	16872782	5.50569e+06	4324259	2.81477e+06	2.35302e+06		50112599				AN4625	Q5B4A5	NID2747 #1	25
NID2747 #2	AN4625	Q5B4A5	2	15521725	15655059	5495488	4.08182e+06	2.81516e+06	1.81675e+06		4.5386e+07				AN4625	Q5B4A5	NID2747 #2	26
NID2749 #1	AN5874	Q5B0Q6	1	14623793	14610936	5.46122e+06	3.68806e+06	2.58388e+06	1.84969e+06		4.28176e+07				AN5874	Q5B0Q6	NID2749 #1	27
NID2749 #2	AN5874	Q5B0Q6	2	18381796	16560737	6283714	4437155	2.97423e+06	2.52907e+06		5.11667e+07				AN5874	Q5B0Q6	NID2749 #2	28
NID2750 #1	AN10700	C8VFV1	1	13074896	12515996	5092296	3265783	2.44976e+06	1.61721e+06		3.80159e+07				AN10700	C8VFV1	NID2750 #1	29
NID2750 #2	AN10700	C8VFV1	2	12193067	11672715	4.25859e+06	3.12452e+06	2.16322e+06	1.45746e+06		3.48696e+07				AN10700	C8VFV1	NID2750 #2	30
NID2755 #1	AN5630	Q5B1F0	1	17935208	17610802	5810866	4.37419e+06	2.96115e+06	2.2538e+06		5.0946e+07				AN5630	Q5B1F0	NID2755 #1	31
NID2755 #2	AN5630	Q5B1F0	2	26479676	25668928	8409813	6.72011e+06	4.49367e+06	3320883		75093083				AN5630	Q5B1F0	NID2755 #2	32
NID2757 #1	AN2406	Q5BAM4	1	19386582	18082612	6622258	4748058	3.20235e+06	2.39117e+06		5.4433e+07				AN2406	Q5BAM4	NID2757 #1	33
NID2757 #2	AN2406	Q5BAM4	2	14506645	14036250	5263897	3673551	2.34327e+06	1.59627e+06		4.14199e+07				AN2406	Q5BAM4	NID2757 #2	34
NID2759 #1	AN9098	Q5ARI2	1	16600493	15835430	5.37391e+06	4.10312e+06	2.67465e+06	1.98445e+06		4.6572e+07				AN9098	Q5ARI2	NID2759 #1	35
NID2759 #2	AN9098	Q5ARI2	2	18014080	17585028	7871362	4456431	2.9284e+06	1.79906e+06		5.26544e+07				AN9098	Q5ARI2	NID2759 #2	36
NID2761 #1	AN8849	Q5AS81	1	16430000	15874374	6.69646e+06	3.83543e+06	2.68895e+06	1.82371e+06		4.73489e+07				AN8849	Q5AS81	NID2761 #1	37
NID2761 #2	AN8849	Q5AS81	2	12508534	11526852	4.77925e+06	2.95253e+06	2.21899e+06	1.44627e+06		3.54324e+07				AN8849	Q5AS81	NID2761 #2	38
NID2773 #1	AN4663	Q5B467	3	0	128484	15227.1	18612.5	261695	43576.8		467595				AN4663	Q5B467	NID2773 #1	39
NID2774 #1	AN4663	Q5B467	4	0	45368.7	28119.8	103744	43080.7	0		220314				AN4663	Q5B467	NID2774 #1	40
NID2801 #1	AN3096	Q5B8N4	1	13161452	12347239	5460593	3.38002e+06	2552940	1.37129e+06		3.82735e+07				AN3096	Q5B8N4	NID2801 #1	42
NID2801 #2	AN3096	Q5B8N4	2	11583597	10761333	4.8232e+06	2.90604e+06	1.97767e+06	1.28836e+06		3.33402e+07				AN3096	Q5B8N4	NID2801 #2	43
NID2802 #1	AN6094	Q5B036	1	14501975	13415096	4.7451e+06	3.57508e+06	2.2318e+06	1.63714e+06		4.01062e+07				AN6094	Q5B036	NID2802 #1	44
NID2802 #2	AN6094	Q5B036	2	13618472	12980951	5166139	3.18118e+06	2231635	1.54161e+06		3.872e+07				AN6094	Q5B036	NID2802 #2	45
NID2825 #1	AN6713	Q5AYB7	1	5323192	5.1232e+06	1.97164e+06	1.24256e+06	888608	622743		1.51719e+07				AN6713	Q5AYB7	NID2825 #1	47
NID2838 #1	AN10909	C8VCZ0	1	15344535	14803900	5250037	3.89607e+06	2.83623e+06	1728407		4.38592e+07				AN10909	C8VCZ0	NID2838 #1	48
NID2838 #2	AN10909	C8VCZ0	2	9126475	8765381	3.24436e+06	2.29128e+06	1.62753e+06	1.04097e+06		2.6096e+07				AN10909	C8VCZ0	NID2838 #2	49
Q5B428	602.8273++	HTVIVYPGYR
				y9 - 1067.5884+	y8 - 966.5407+	y7 - 867.4723+	y6 - 754.3883+	y5 - 655.3198+	y4 - 492.2565+	y3 - 395.2037+
Strain	AspGD Gene KO	UniProt	Replicate	Peak Area	Peak Area	Peak Area	Peak Area	Peak Area	Peak Area	Peak Area		Total
NID2531 #1	Reference	Reference	1	0	9831.39	33803.2	40227.4	733.241	374447	0		459042
NID2531 #2	Reference	Reference	2	0	4498.14	30392	39170.6	3923.91	305279	0		383263
NID2709 #1	AN2405	Q5BAM5	1	0	0	41738.9	96359.2	33196.1	45875.3	10994.3		228164
NID2709 #2	AN2405	Q5BAM5	2	3388.07	0	118880	51651.4	43666.7	28468.5	24610.2		270665
NID2710 #1	AN3464	Q5B7L6	1	0	0	100041	81608	65034.5	19102.6	9535.24		275321
NID2710 #2	AN3464	Q5B7L6	2	7942.63	22017.5	33028.1	38844.9	34836.7	4743.84	0		141414
NID2712 #1	AN10974	C8VBW6	1	0	4811.51	38657.4	77606.8	14271.3	43110.8	20162		198620
NID2712 #2	AN10974	C8VBW6	2	464.508	0	213614	5699.61	0	8624.32	0		228402
NID2713 #1	AN4663	Q5B467	1	3.51909e+06	5902233	4.2634e+06	2.05031e+06	1358663	933569	40964.5		1.80682e+07
NID2713 #2	AN4663	Q5B467	2	2.37329e+06	6.61869e+06	3125182	1.47363e+06	913176	647380	41467.4		1.51928e+07
NID2714 #1	AN2165	C8VM99	1	38805.2	17189	31683.3	15098.6	46224	52223.6	24127.6		225351
NID2714 #2	AN2165	C8VM99	2	147422	42027.5	91564.6	4766.08	9262.65	45093.9	9971.26		350108
NID2715 #1	AN0761	Q5BFB9	1	174196	24724.2	84045.8	139500	46759.7	106300	11981.9		587507
NID2715 #2	AN0761	Q5BFB9	2	40705.2	31028.1	69878.3	52804.4	2962.74	62336.6	351.2		260066
NID2721 #1	AN1566	C8VN06	1	60571.7	126199	58468	33708.5	37118.3	85606.6	12964.7		414637
NID2721 #2	AN1566	C8VN06	2	0	40663.2	46070.4	35481.5	51479.7	31222.8	4618.99		209537
NID2723 #1	AN7375	Q5AWF5	1	223448	49757	107277	12718.8	32377.9	2910.58	6142.55		434631
NID2723 #2	AN7375	Q5AWF5	2	6456.75	6477.1	52317.6	228891	234920	501809	0		1.03087e+06
NID2733 #1	AN0134	Q5BH46	1	32189.6	0	74264.4	5124.79	2222.99	36657.2	21710.1		172169
NID2733 #2	AN0134	Q5BH46	2	0	1073.65	23882.8	86823.9	18710.8	4691.98	143.488		135327
NID2745 #1	AN8945	C8VLB4	1	6978.87	64332.6	81050.8	28355.8	39172.8	32128.8	12249		264269
NID2745 #2	AN8945	C8VLB4	2	0	25321.5	31276.6	122941	74316.4	46803.6	4362.31		305021
NID2746 #1	AN9193	C8VJU3	1	285088	90156.2	32165.4	193831	0	151573	0		752814
NID2746 #2	AN9193	C8VJU3	2	21284.5	34093.8	89326.3	8312.79	8714.34	43002	33238.7		237972
NID2747 #1	AN4625	Q5B4A5	1	4252.74	25914.4	41238.5	27188.4	43033.1	28552.3	0		170179
NID2747 #2	AN4625	Q5B4A5	2	177668	0	15921.7	182753	0	23142.7	0		399486
NID2749 #1	AN5874	Q5B0Q6	1	325536	27776.1	9036.59	243001	0	26449.1	16998.4		648797
NID2749 #2	AN5874	Q5B0Q6	2	0	27852.5	18127.5	133529	0	2248.25	0		181758
NID2750 #1	AN10700	C8VFV1	1	0	0	56895.7	54494.1	5980.38	43385.5	3264.29		164020
NID2750 #2	AN10700	C8VFV1	2	6469.25	20519	78168.1	62498	45309.6	21772.7	11756.4		246493
NID2755 #1	AN5630	Q5B1F0	1	0	9957.79	75229.3	2257.99	2533.16	0	7352		97330.2
NID2755 #2	AN5630	Q5B1F0	2	10340.1	0	78084.7	122510	0	122579	0		333514
NID2757 #1	AN2406	Q5BAM4	1	119421	0	3984.86	11230.5	29604.2	32823.6	17905.3		214969
NID2757 #2	AN2406	Q5BAM4	2	127202	0	122438	77268.1	31515.4	26740.8	2368.1		387533
NID2759 #1	AN9098	C8VH48	1	33042.7	23196.3	69940.2	21510.3	0	66118.5	5782.36		219590
NID2759 #2	AN9098	C8VH48	2	114672	19108.6	2737.05	75783.6	0	75528.1	0		287830
NID2761 #1	AN8849	Q5AS81	1	413509	51849.5	49201.4	178040	11786	48540.8	3594.89		756521
NID2761 #2	AN8849	Q5AS81	2	0	49497.7	15097.9	29223.3	0	8000.81	0		101820
NID2773 #1	AN4663	Q5B467	3	4.53528e+06	5405917	3.73245e+06	1.63319e+06	1.35772e+06	1.02616e+06	27154		1.77179e+07
NID2774 #1	AN4663	Q5B467	4	5.31344e+06	7.84814e+06	4.15041e+06	2.58906e+06	2090806	1.5059e+06	546.216		2.34983e+07
NID2801 #1	AN3096	Q5B8N4	1	0	0	0	0	0	0	167356		167356
NID2801 #2	AN3096	Q5B8N4	2	0	11616.5	40297.6	22447.7	1830.19	24046	0		100238
NID2802 #1	AN6094	Q5B036	1	7132.24	18234.8	17074.4	8706.09	10330.6	8318.18	6790.65		76586.9
NID2802 #2	AN6094	Q5B036	2	4527.58	18650.5	28364.8	11795.5	641.483	9121.94	3940.09		77041.8
NID2825 #1	AN6713	C8V1Q1	1	0	23598.5	0	371378	11278.4	12727.3	0		418982
NID2838 #1	AN10909	C8VCZ0	1	103458	0	89920.6	19848.6	20568.9	20889.7	5958.05		260644
NID2838 #2	AN10909	C8VCZ0	2	1404.43	10657.9	40541.3	79575.1	12454.6	30849.6	10218.6		185701

## Sheet: Figure 2, 3
Q5B428	406.8925+++	[methyl]HTVIVYPGYR
		y6 - 754.3883+	y5 - 655.3198+	y4 - 492.2565+	y3 - 395.2037+	y2 - 338.1823+
	Replicate	Peak Area	Peak Area	Peak Area	Peak Area	Peak Area
	Reference_1	149324	678710	7.37167e+06	1.95458e+06	777602
	Reference_2	98311.3	1.09763e+06	8.09245e+06	2.06339e+06	401093
	Reference_3	147013	754679	7.4064e+06	1.89387e+06	525958
	AN4663-KO_1	188.281	7284.13	43108.6	3416.33	58881.9
	AN4663-KO_2	11478.8	0	87431.7	12884.1	135355
	AN4663-KO_3	0	0	0	19885.1	43142.7
	AN4663-KO_4	0	0	3641.77	9152	10220.8
	AN4663-E340A_1	11499.3	3558.79	12330.9	34071.2	44903.2
	AN4663-E340A_2	143118	2229.74	14863.8	8662.53	49316.4
	AN4663-E340A_3	0	0	6376.81	104956	30175.9
	AN4663-N-RFP_1	122885	788389	5.82337e+06	1.52085e+06	352408
	AN4663-N-RFP_2	80558.5	833782	6509564	1.70596e+06	382973
	AN4663-N-RFP_3	106745	815178	6565315	1.70609e+06	689871
	AN4663-C-RFP_1	10133.8	0	323542	51643	202810
	AN4663-C-RFP_2	25504.9	54559.6	552438	123825	86649.5
	AN4663-C-RFP_3	21453.9	40260	360873	66599.1	73841.8
Q5B428	602.8273++	HTVIVYPGYR
		y7 - 867.4723+	y6 - 754.3883+	y5 - 655.3198+	y4 - 492.2565+
	Replicate	Peak Area	Peak Area	Peak Area	Peak Area		Total
	Reference_1	52946.4	0	5355.74	17845.5		76147.7
	Reference_2	10395.5	0	0	0		10395.5
	Reference_3	569.226	0	1272.85	25726.9		27569
	AN4663-KO_1	1.14641e+06	670758	383190	349731		2.55009e+06
	AN4663-KO_2	1.16635e+06	783434	470994	400255		2.82103e+06
	AN4663-KO_3	1.20403e+06	789411	510826	439183		2.94345e+06
	AN4663-KO_4	2.07115e+06	1.27133e+06	757015	653505		4.75301e+06
	AN4663-E340A_1	2.03813e+06	1358468	872632	837154		5.10639e+06
	AN4663-E340A_2	828603	535703	349808	313138		2.02725e+06
	AN4663-E340A_3	1.10963e+06	720193	471540	439635		2.741e+06
	AN4663-N-RFP_1	67896	0	0	15471.1		83367
	AN4663-N-RFP_2	6935.9	0	71.5267	0		7007.43
	AN4663-N-RFP_3	16054.5	0	25794.7	0		41849.2
	AN4663-C-RFP_1	1.15979e+06	709709	461568	320422		2.65149e+06
	AN4663-C-RFP_2	1.43008e+06	880848	540124	374085		3.22514e+06
	AN4663-C-RFP_3	1.49287e+06	868322	582060	464819		3.40807e+06

## Sheet: Figure 4
Q5B428	609.8351++	[methyl]HTVIVYPGYR
				y9 - 1067.5884+	y8 - 966.5407+	y7 - 867.4723+	y6 - 754.3883+	y5 - 655.3198+	y4 - 492.2565+		Total
Strain	AspGD Gene KO	UniProt	Replicate	Peak Area	Peak Area	Peak Area	Peak Area	Peak Area	Peak Area
NID2531 #1	Reference	Reference	1	6084710	5.59288e+06	2.07511e+06	1.45935e+06	953149	689656		1.68549e+07
NID2531 #2	Reference	Reference	2	6.42116e+06	6.2216e+06	2.15944e+06	1600905	1.00902e+06	746488		1.81586e+07
NID2843 #1	Trunc_AN4663_225-559	Q5B467	1	0	0	0	8430.16	67739.4	11439.5		87609
NID2844 #1	Trunc_AN4663_225-559	Q5B467	2	0	0	0	9423.03	0	14724.5		24147.5
NID2845 #1	Trunc_AN4663_225-559	Q5B467	3	0	0	0	0	28219.9	84667.1		112887
Q5B428	602.8273++	HTVIVYPGYR
				y9 - 1067.5884+	y8 - 966.5407+	y7 - 867.4723+	y6 - 754.3883+	y5 - 655.3198+	y4 - 492.2565+		Total
Strain	AspGD Gene KO	UniProt	Replicate	Peak Area	Peak Area	Peak Area	Peak Area	Peak Area	Peak Area
NID2531 #1	Reference	Reference	1	0	11306.3	5751.32	277614	13211.9	4400.55		312284
NID2531 #2	Reference	Reference	2	0	836.71	0	285280	20344.4	0		306461
NID2843 #1	Trunc_AN4663_225-559	Q5B467	1	2.15761e+06	3.71415e+06	2962753	1.36993e+06	923742	732708		1.18609e+07
NID2844 #1	Trunc_AN4663_225-559	Q5B467	2	2.16152e+06	3.7314e+06	1.78297e+06	937280	596532	514841		9.72454e+06
NID2845 #1	Trunc_AN4663_225-559	Q5B467	3	1.42623e+06	2.61056e+06	1715559	629215	360395	374689		7.11664e+06

## Sheet: Reference
AspGD	Uniprot	Strain number	Ref number	Candidate selection
Ref	Ref	NID2531 #1	1	-
Ref	Ref	NID2531 #2	2	-
AN2405	Q5BAM5	NID2709 #1	3	Manual
AN2405	Q5BAM5	NID2709 #2	4	Manual
AN3464	Q5B7L6	NID2710 #1	5	Proteomics
AN3464	Q5B7L6	NID2710 #2	6	Proteomics
AN10974	C8VBW6	NID2712 #1	7	Manual
AN10974	C8VBW6	NID2712 #2	8	Manual
AN4663	Q5B467	NID2713 #1	9	Proteomics
AN4663	Q5B467	NID2713 #2	10	Proteomics
AN2165	C8VM99	NID2714 #1	11	Proteomics
AN2165	C8VM99	NID2714 #2	12	Proteomics
AN0761	Q5BFB9	NID2715 #1	13	Proteomics
AN0761	Q5BFB9	NID2715 #2	14	Proteomics
AN1566	C8VN06	NID2721 #1	15	Proteomics
AN1566	C8VN06	NID2721 #2	16	Proteomics
AN7375	Q5AWF5	NID2723 #1	17	Manual
AN7375	Q5AWF5	NID2723 #2	18	Manual
AN0134	Q5BH46	NID2733 #1	19	Proteomics
AN0134	Q5BH46	NID2733 #2	20	Proteomics
AN8945	C8VLB4	NID2745 #1	21	Proteomics
AN8945	C8VLB4	NID2745 #2	22	Proteomics
AN9193	C8VJU3	NID2746 #1	23	Proteomics
AN9193	C8VJU3	NID2746 #2	24	Proteomics
AN4625	Q5B4A5	NID2747 #1	25	Proteomics
AN4625	Q5B4A5	NID2747 #2	26	Proteomics
AN5874	C8UZY1	NID2749 #1	27	Proteomics
AN5874	C8UZY1	NID2749 #2	28	Proteomics
AN10700	C8VFV1	NID2750 #1	29	Proteomics
AN10700	C8VFV1	NID2750 #2	30	Proteomics
AN5630	Q5B1F0	NID2755 #1	31	Proteomics
AN5630	Q5B1F0	NID2755 #2	32	Proteomics
AN2406	Q5BAM4	NID2757 #1	33	Manual
AN2406	Q5BAM4	NID2757 #2	34	Manual
AN9098	C8VH48	NID2759 #1	35	Proteomics
AN9098	C8VH48	NID2759 #2	36	Proteomics
AN8849	Q5AS81	NID2761 #1	37	Proteomics
AN8849	Q5AS81	NID2761 #2	38	Proteomics
AN4663	Q5B467	NID2773 #1	39	Proteomics
AN4663	Q5B467	NID2774 #1	40	Proteomics
AN4663_E340A	Q5B467	NID2787 #1	41	Proteomics
AN3096	Q5B8N4	NID2801 #1	42	Manual
AN3096	Q5B8N4	NID2801 #2	43	Manual
AN6094	Q5B036	NID2802 #1	44	Proteomics
AN6094	Q5B036	NID2802 #2	45	Proteomics
AN4663_E340A	Q5B467	NID2815 #1	46	Proteomics
AN6713	C8V1Q1	NID2825 #1	47	Proteomics
AN10909	C8VCZ0	NID2838 #1	48	Proteomics
AN10909	C8VCZ0	NID2838 #2	49	Proteomics
Trunc_AN4663_225-559	Q5B467	NID2843 #1	50	Proteomics
Trunc_AN4663_225-559	Q5B467	NID2844 #1	51	Proteomics
Trunc_AN4663_225-559	Q5B467	NID2845 #1	52	Proteomics
